# Supplementary material for: Emerging Roles of Heat-Induced circRNAs Related to Lactogenesis in Lactating Sows
Source: Front Genet. 2020 Feb 11;10:1347. doi: 10.3389/fgene.2019.01347 (PMC7027193; doi:10.3389/fgene.2019.01347)
Supplement: Supplementary file 4 [file Table_2.xlsx]

## Sheet: A
Summary of read mapping statistics
Sample	Raw reads	Valid reads	Mapped reads	Unique Mapped reads	Multi Mapped reads	PE Mapped reads	Mapped left reads	Mapped right reads	Reads map to sense strand	Reads map to antisense strand	Non-splice reads	Splice reads
NS_1	91292588	85177006	68288623 (80.17%)	57922440 (68.00%)	10366183 (12.17%)	64915126 (76.21%)	34488920 (40.49%)	33799703 (39.68%)	28893112 (33.92%)	29029328 (34.08%)	36502383 (42.85%)	21420057 (25.15%)
NS_2	88634536	83207184	65650942 (78.90%)	56880267 (68.36%)	8770675 (10.54%)	61938614 (74.44%)	33546239 (40.32%)	32104703 (38.58%)	28347672 (34.07%)	28532595 (34.29%)	40231873 (48.35%)	16648394 (20.01%)
NS_3	97787280	91492190	74727734 (81.68%)	62814898 (68.66%)	11912836 (13.02%)	71549944 (78.20%)	37782649 (41.30%)	36945085 (40.38%)	31330366 (34.24%)	31484532 (34.41%)	40502976 (44.27%)	22311922 (24.39%)
HS_1	103942660	96382572	74184969 (76.97%)	65390865 (67.85%)	8794104 (9.12%)	69587562 (72.20%)	38034902 (39.46%)	36150067 (37.51%)	32643645 (33.87%)	32747220 (33.98%)	49403642 (51.26%)	15987223 (16.59%)
HS_2	86037014	79430382	61662967 (77.63%)	53909003 (67.87%)	7753964 (9.76%)	57853766 (72.84%)	31595954 (39.78%)	30067013 (37.85%)	26933386 (33.91%)	26975617 (33.96%)	39735358 (50.03%)	14173645 (17.84%)
HS_3	99417880	92807236	81604272 (87.93%)	71920824 (77.49%)	9683448 (10.43%)	76943398 (82.91%)	41922616 (45.17%)	39681656 (42.76%)	35803460 (38.58%)	36117364 (38.92%)	46236564 (49.82%)	25684260 (27.67%)
Note: Unique mapped reads indicated that a read was aligned to only one locus in the reference genome. Non-splice reads can be mapped directly to the reference genome end to end, whereas splice reads cannot be aligned directly to the genome.

## Sheet: B
All transcripts expressed in six samples
tracking_id	class_code	nearest_ref_id	gene_short_name	locus	length
TCONS_00000001	x	ENSSSCT00000042326	ENSSSCG00000037372	1:0-9097	9097
TCONS_00000002	x	ENSSSCT00000042326	ENSSSCG00000037372	1:0-9097	7036
TCONS_00000003	=	ENSSSCT00000058189	PSMB1	1:23367-39931	1211
TCONS_00000004	=	ENSSSCT00000023500	PSMB1	1:23852-40113	800
TCONS_00000005	=	ENSSSCT00000024788	DLL1	1:198991-208447	3291
TCONS_00000006	=	ENSSSCT00000062318	DLL1	1:199230-211342	5029
TCONS_00000007	j	ENSSSCT00000062318	DLL1	1:201405-208447	2596
TCONS_00000008	=	ENSSSCT00000054059	ENSSSCG00000033475	1:352195-356072	1620
TCONS_00000009	=	ENSSSCT00000052221	ENSSSCG00000035944	1:470505-475345	1876
TCONS_00000010	=	ENSSSCT00000004433	TCTE3	1:541027-551881	585
TCONS_00000011	=	ENSSSCT00000004429	PHF10	1:555354-578329	3548
TCONS_00000012	j	ENSSSCT00000004429	PHF10	1:556721-561668	1962
TCONS_00000013	=	ENSSSCT00000004435	PHF10	1:556721-578329	3425
TCONS_00000014	=	ENSSSCT00000031463	PHF10	1:556721-578329	3269
TCONS_00000015	=	ENSSSCT00000056161	PHF10	1:557077-576706	1865
TCONS_00000016	j	ENSSSCT00000004431	WDR27	1:578464-599402	1915
TCONS_00000017	j	ENSSSCT00000004431	WDR27	1:578464-599402	1741
TCONS_00000018	=	ENSSSCT00000004431	WDR27	1:578464-719928	2468
TCONS_00000019	j	ENSSSCT00000004431	WDR27	1:578464-720108	2290
TCONS_00000020	j	ENSSSCT00000004431	WDR27	1:578464-720108	1561
TCONS_00000021	j	ENSSSCT00000004431	WDR27	1:578464-720108	3383
TCONS_00000022	j	ENSSSCT00000004431	WDR27	1:600255-720108	2390
TCONS_00000023	j	ENSSSCT00000004431	WDR27	1:601840-720108	3130
TCONS_00000024	j	ENSSSCT00000004431	WDR27	1:607799-630153	6627
TCONS_00000025	j	ENSSSCT00000004431	WDR27	1:611609-720108	8603
TCONS_00000026	j	ENSSSCT00000004431	WDR27	1:626427-632860	2321
TCONS_00000027	=	ENSSSCT00000004436	THBS2	1:855023-882461	5774
TCONS_00000030	=	ENSSSCT00000044270	THBS2	1:855034-882181	5385
TCONS_00000031	=	ENSSSCT00000064251	THBS2	1:857885-883694	6668
TCONS_00000032	=	ENSSSCT00000050017	ENSSSCG00000031703	1:1414133-1423270	2187
TCONS_00000033	=	ENSSSCT00000062180	ENSSSCG00000031703	1:1414133-1423270	2136
TCONS_00000034	=	ENSSSCT00000004442	ENSSSCG00000004017	1:1495817-1517984	1966
TCONS_00000035	=	ENSSSCT00000027970	ENSSSCG00000004017	1:1496031-1521666	5924
TCONS_00000036	-	-	-	1:1698887-1702094	2237
TCONS_00000037	-	-	-	1:1699086-1702094	3008
TCONS_00000038	-	-	-	1:1832020-1835527	2454
TCONS_00000039	-	-	-	1:1832091-1833696	1605
TCONS_00000040	-	-	-	1:1832091-1835527	2135
TCONS_00000041	-	-	-	1:1834217-1835527	986
TCONS_00000042	=	ENSSSCT00000060870	UNC93A	1:1919993-1958266	2819
TCONS_00000043	j	ENSSSCT00000060870	UNC93A	1:1929521-1946864	1258
TCONS_00000044	=	ENSSSCT00000023133	UNC93A	1:1929927-1958142	2094
TCONS_00000045	j	ENSSSCT00000060870	UNC93A	1:1936516-1958328	5122
TCONS_00000046	=	ENSSSCT00000048825	UNC93A	1:1937966-1958142	3491
TCONS_00000047	=	ENSSSCT00000004444	UNC93A	1:1938456-1958328	2111
TCONS_00000048	=	ENSSSCT00000059154	UNC93A	1:1943175-1958139	2133
TCONS_00000049	=	ENSSSCT00000028127	ENSSSCG00000022580	1:1974564-1976149	1227
TCONS_00000050	=	ENSSSCT00000054151	ENSSSCG00000037137	1:2003171-2008112	4941
TCONS_00000051	=	ENSSSCT00000038732	ENSSSCG00000034196	1:2070633-2074974	285
TCONS_00000052	=	ENSSSCT00000045564	ENSSSCG00000034196	1:2074627-2074974	237
TCONS_00000053	=	ENSSSCT00000044112	ENSSSCG00000004024	1:2145175-2164767	3192
TCONS_00000054	j	ENSSSCT00000044112	ENSSSCG00000004024	1:2145175-2166287	4658
TCONS_00000055	=	ENSSSCT00000064938	ENSSSCG00000004024	1:2146809-2164764	1768
TCONS_00000056	j	ENSSSCT00000044112	ENSSSCG00000004024	1:2146809-2166287	3312
TCONS_00000057	=	ENSSSCT00000046761	ENSSSCG00000004024	1:2149443-2166287	3122
TCONS_00000058	=	ENSSSCT00000064255	ENSSSCG00000004024	1:2149443-2166287	3197
TCONS_00000059	=	ENSSSCT00000004450	ENSSSCG00000004024	1:2149559-2163866	606
TCONS_00000060	=	ENSSSCT00000049529	RPS6KA2	1:2203605-2522599	5485
TCONS_00000061	=	ENSSSCT00000004447	RPS6KA2	1:2261970-2519756	2118
TCONS_00000062	j	ENSSSCT00000049529	RPS6KA2	1:2261970-2522601	5040
TCONS_00000063	=	ENSSSCT00000041914	RPS6KA2	1:2320862-2522600	5187
TCONS_00000064	=	ENSSSCT00000052370	RPS6KA2	1:2320984-2522600	4988
TCONS_00000065	=	ENSSSCT00000058943	RPS6KA2	1:2323164-2519756	2280
TCONS_00000066	j	ENSSSCT00000049529	RPS6KA2	1:2323164-2522601	5202
TCONS_00000067	=	ENSSSCT00000056494	RPS6KA2	1:2374151-2517986	1953
TCONS_00000068	j	ENSSSCT00000049529	RPS6KA2	1:2374151-2522601	5016
TCONS_00000069	j	ENSSSCT00000049529	RPS6KA2	1:2375023-2522601	5208
TCONS_00000070	=	ENSSSCT00000044784	RPS6KA2	1:2375023-2522601	5285
TCONS_00000071	=	ENSSSCT00000061934	RPS6KA2	1:2375052-2522600	5138
TCONS_00000072	j	ENSSSCT00000064731	MPC1	1:2541402-2552921	1085
TCONS_00000073	j	ENSSSCT00000064731	MPC1	1:2541407-2552921	1155
TCONS_00000074	=	ENSSSCT00000064731	MPC1	1:2541628-2552388	330
TCONS_00000075	j	ENSSSCT00000064731	MPC1	1:2541960-2552921	9985
TCONS_00000076	=	ENSSSCT00000004445	SFT2D1	1:2576728-2593516	1127
TCONS_00000077	=	ENSSSCT00000004446	PRR18	1:2599705-2602266	786
TCONS_00000078	=	ENSSSCT00000057225	ENSSSCG00000036759	1:2608626-2613747	1086
TCONS_00000079	=	ENSSSCT00000053976	ENSSSCG00000034946	1:2677004-2679627	1415
TCONS_00000080	=	ENSSSCT00000037176	TBXT	1:2716762-2724976	1299
TCONS_00000081	=	ENSSSCT00000037270	TBXT	1:2717164-2724976	1308
TCONS_00000082	=	ENSSSCT00000004453	PDE10A	1:2882386-3386480	2266
TCONS_00000083	j	ENSSSCT00000004453	PDE10A	1:2882386-3397928	7811
TCONS_00000084	=	ENSSSCT00000051543	ssc-mir-9831	1:2893741-2893818	77
TCONS_00000085	=	ENSSSCT00000021249	RF00026	1:3065679-3065779	100
TCONS_00000086	=	ENSSSCT00000041923	PDE10A	1:3120410-3383543	2797
TCONS_00000087	j	ENSSSCT00000004453	PDE10A	1:3120410-3386480	2714
TCONS_00000088	j	ENSSSCT00000004453	PDE10A	1:3120410-3397928	8460
TCONS_00000089	j	ENSSSCT00000004453	PDE10A	1:3120410-3397928	8398
TCONS_00000090	j	ENSSSCT00000004453	PDE10A	1:3120410-3397928	8309
TCONS_00000091	j	ENSSSCT00000004453	PDE10A	1:3284132-3397928	8585
TCONS_00000092	-	-	-	1:3389346-3397928	5770
TCONS_00000093	=	ENSSSCT00000004454	C6orf118	1:3409210-3424328	1224
TCONS_00000094	j	ENSSSCT00000048870	PRKN	1:5465389-6732089	3747
TCONS_00000095	j	ENSSSCT00000048870	PRKN	1:5465389-6732089	3750
TCONS_00000096	j	ENSSSCT00000048870	PRKN	1:5465412-6732089	3574
TCONS_00000097	=	ENSSSCT00000022182	RF00001	1:5525079-5525185	106
TCONS_00000098	j	ENSSSCT00000048870	PRKN	1:5679023-6441000	1692
TCONS_00000099	j	ENSSSCT00000048870	PRKN	1:5679023-6511587	988
TCONS_00000100	=	ENSSSCT00000048870	PRKN	1:5679023-6729846	1386
TCONS_00000101	=	ENSSSCT00000004459	PRKN	1:5698505-6729846	1230
TCONS_00000102	j	ENSSSCT00000048870	PRKN	1:5912029-6732089	3268
TCONS_00000103	j	ENSSSCT00000048870	PRKN	1:5919315-6732089	3308
TCONS_00000104	j	ENSSSCT00000048870	PRKN	1:6129312-6732089	3142
TCONS_00000105	j	ENSSSCT00000048870	PRKN	1:6129313-6291705	849
TCONS_00000106	j	ENSSSCT00000048870	PRKN	1:6129822-6291705	846
TCONS_00000107	j	ENSSSCT00000048870	PRKN	1:6129822-6732089	3200
TCONS_00000108	=	ENSSSCT00000004461	AGPAT4	1:6771660-6883113	2128
TCONS_00000109	=	ENSSSCT00000049202	AGPAT4	1:6771660-6883113	2077
TCONS_00000110	j	ENSSSCT00000049202	AGPAT4	1:6771660-6884988	3969
TCONS_00000111	j	ENSSSCT00000049202	AGPAT4	1:6771660-6884988	6225
TCONS_00000113	j	ENSSSCT00000049202	AGPAT4	1:6872502-6884988	2874
TCONS_00000114	j	ENSSSCT00000049202	AGPAT4	1:6875550-6884988	5166
TCONS_00000115	=	ENSSSCT00000045160	ENSSSCG00000032396	1:6918943-6926626	414
TCONS_00000116	x	ENSSSCT00000027521	MAP3K4	1:6921863-6922587	724
TCONS_00000117	x	ENSSSCT00000027521	MAP3K4	1:6924602-6926410	1808
TCONS_00000118	=	ENSSSCT00000004466	PLG	1:7061968-7109531	3174
TCONS_00000119	=	ENSSSCT00000055744	PLG	1:7062450-7109517	4021
TCONS_00000120	=	ENSSSCT00000020364	RF00425	1:7230643-7230770	127
TCONS_00000121	=	ENSSSCT00000004468	SLC22A2	1:7289169-7323644	4136
TCONS_00000122	=	ENSSSCT00000004476	TCP1	1:7590139-7601795	2377
TCONS_00000123	=	ENSSSCT00000065084	TCP1	1:7590212-7600699	2635
TCONS_00000124	=	ENSSSCT00000049476	TCP1	1:7590212-7600706	3018
TCONS_00000125	=	ENSSSCT00000042694	TCP1	1:7590262-7600703	3908
TCONS_00000126	=	ENSSSCT00000020125	RF00429	1:7593175-7593315	140
TCONS_00000127	j	ENSSSCT00000004476	TCP1	1:7593188-7601795	2027
TCONS_00000128	=	ENSSSCT00000020200	RF00401	1:7599024-7599157	133
TCONS_00000129	-	-	-	1:7651621-7658108	6402
TCONS_00000130	-	-	-	1:7651780-7664135	3939
TCONS_00000131	=	ENSSSCT00000056447	SOD2	1:7679351-7691724	3832
TCONS_00000133	=	ENSSSCT00000039602	SOD2	1:7679570-7691722	3494
TCONS_00000134	=	ENSSSCT00000054351	SOD2	1:7679570-7691722	3536
TCONS_00000135	j	ENSSSCT00000004481	TAGAP	1:8208083-8214067	2232
TCONS_00000136	=	ENSSSCT00000004481	TAGAP	1:8208083-8218717	4294
TCONS_00000137	j	ENSSSCT00000004481	TAGAP	1:8208083-8219339	5222
TCONS_00000139	=	ENSSSCT00000060453	RSPH3	1:8243299-8265639	1158
TCONS_00000140	j	ENSSSCT00000046747	RSPH3	1:8243299-8266083	1501
TCONS_00000141	j	ENSSSCT00000046747	RSPH3	1:8243299-8266083	1614
TCONS_00000142	j	ENSSSCT00000046747	RSPH3	1:8243525-8260253	2502
TCONS_00000143	j	ENSSSCT00000046747	RSPH3	1:8243525-8260253	2490
TCONS_00000144	j	ENSSSCT00000046747	RSPH3	1:8243525-8261609	1289
TCONS_00000145	=	ENSSSCT00000046747	RSPH3	1:8243525-8265639	1563
TCONS_00000146	j	ENSSSCT00000046747	RSPH3	1:8243525-8266083	2064
TCONS_00000147	=	ENSSSCT00000004483	RSPH3	1:8243768-8265639	1746
TCONS_00000148	j	ENSSSCT00000046747	RSPH3	1:8243768-8266083	2141
TCONS_00000149	=	ENSSSCT00000061102	RSPH3	1:8246885-8265639	1900
TCONS_00000150	j	ENSSSCT00000046747	RSPH3	1:8259305-8266083	1819
TCONS_00000151	-	-	-	1:8288345-8289127	706
TCONS_00000152	-	-	-	1:8348688-8350492	1000
TCONS_00000153	-	-	-	1:8348688-8367788	1301
TCONS_00000154	j	ENSSSCT00000004487	EZR	1:8403354-8452747	23353
TCONS_00000155	=	ENSSSCT00000004487	EZR	1:8403354-8452747	2783
TCONS_00000156	=	ENSSSCT00000042927	DYNLT1	1:8555744-8567087	5531
TCONS_00000157	=	ENSSSCT00000054081	DYNLT1	1:8555744-8567087	5252
TCONS_00000158	o	ENSSSCT00000054081	DYNLT1	1:8563327-8568464	4737
TCONS_00000159	=	ENSSSCT00000045179	ENSSSCG00000035802	1:8765338-8767283	207
TCONS_00000160	=	ENSSSCT00000063105	ENSSSCG00000035802	1:8765494-8767283	204
TCONS_00000161	=	ENSSSCT00000037724	ENSSSCG00000035802	1:8766017-8767283	240
TCONS_00000162	-	-	-	1:8881693-8883996	2013
TCONS_00000163	-	-	-	1:8882532-8883168	636
TCONS_00000164	=	ENSSSCT00000013465	SERAC1	1:8935072-9000228	1905
TCONS_00000166	j	ENSSSCT00000049688	SERAC1	1:8935072-9003092	4943
TCONS_00000167	=	ENSSSCT00000049688	SERAC1	1:8935090-9001474	3345
TCONS_00000168	=	ENSSSCT00000039355	SERAC1	1:8935131-9000884	3780
TCONS_00000169	j	ENSSSCT00000049688	SERAC1	1:8994687-9003092	5723
TCONS_00000170	=	ENSSSCT00000048759	ENSSSCG00000040580	1:9209307-9210565	888
TCONS_00000171	-	-	-	1:9325332-9329534	1771
TCONS_00000172	-	-	-	1:9326635-9329534	870
TCONS_00000173	-	-	-	1:9327202-9329534	556
TCONS_00000175	=	ENSSSCT00000053025	ENSSSCG00000038527	1:9621067-9624056	2989
TCONS_00000176	=	ENSSSCT00000004492	TMEM242	1:9667884-9719230	1966
TCONS_00000177	j	ENSSSCT00000004492	TMEM242	1:9670704-9719230	2415
TCONS_00000178	=	ENSSSCT00000004498	ENSSSCG00000004069	1:11441932-11442630	534
TCONS_00000179	=	ENSSSCT00000004497	NOX3	1:11446059-11500978	1707
TCONS_00000180	j	ENSSSCT00000031943	TFB1M	1:11566187-11589685	3923
TCONS_00000181	j	ENSSSCT00000031943	TFB1M	1:11566187-11598139	2809
TCONS_00000182	=	ENSSSCT00000054905	TFB1M	1:11566187-11652934	5708
TCONS_00000183	=	ENSSSCT00000031943	TFB1M	1:11566244-11653871	2450
TCONS_00000184	=	ENSSSCT00000047251	ENSSSCG00000033953	1:12221171-12226307	201
TCONS_00000185	=	ENSSSCT00000066016	ENSSSCG00000033953	1:12221589-12226307	195
TCONS_00000186	=	ENSSSCT00000061898	ENSSSCG00000033953	1:12222810-12226307	201
TCONS_00000187	=	ENSSSCT00000047096	ENSSSCG00000033953	1:12225011-12226307	195
TCONS_00000188	j	ENSSSCT00000004500	ENSSSCG00000004071	1:12297376-12382687	2262
TCONS_00000189	=	ENSSSCT00000004500	ENSSSCG00000004071	1:12297376-12395687	2465
TCONS_00000191	j	ENSSSCT00000004500	ENSSSCG00000004071	1:12375340-12397343	3384
TCONS_00000192	j	ENSSSCT00000056688	ENSSSCG00000004072	1:12449405-12598673	2340
TCONS_00000193	-	-	-	1:12449415-12450145	730
TCONS_00000194	=	ENSSSCT00000004501	ENSSSCG00000004072	1:12528707-12597745	1131
TCONS_00000195	=	ENSSSCT00000056688	ENSSSCG00000004072	1:12528707-12597745	1131
TCONS_00000196	=	ENSSSCT00000004504	RGS17	1:13340247-13442039	4514
TCONS_00000197	j	ENSSSCT00000004505	MTRF1L	1:13445543-13457469	2400
TCONS_00000198	j	ENSSSCT00000004505	MTRF1L	1:13445543-13458290	2166
TCONS_00000199	j	ENSSSCT00000004505	MTRF1L	1:13445543-13458290	2816
TCONS_00000200	=	ENSSSCT00000004505	MTRF1L	1:13446491-13458290	1345
TCONS_00000201	=	ENSSSCT00000004506	FBXO5	1:13466913-13482333	6470
TCONS_00000202	=	ENSSSCT00000061652	FBXO5	1:13466913-13482333	6287
TCONS_00000203	=	ENSSSCT00000065019	ENSSSCG00000031720	1:13633323-13667301	183
TCONS_00000204	j	ENSSSCT00000030512	ENSSSCG00000004081	1:13715266-14042954	5021
TCONS_00000205	j	ENSSSCT00000030512	ENSSSCG00000004081	1:13715266-14042954	5030
TCONS_00000206	j	ENSSSCT00000030512	ENSSSCG00000004081	1:13715266-14091957	20733
TCONS_00000207	j	ENSSSCT00000030512	ENSSSCG00000004081	1:13715266-14114465	22493
TCONS_00000208	j	ENSSSCT00000030512	ENSSSCG00000004081	1:13715266-14114465	22109
TCONS_00000209	j	ENSSSCT00000030512	ENSSSCG00000004081	1:13715266-14114465	22442
TCONS_00000210	j	ENSSSCT00000030512	ENSSSCG00000004081	1:13715266-14114465	22448
TCONS_00000211	j	ENSSSCT00000030512	ENSSSCG00000004081	1:13715266-14114465	22508
TCONS_00000212	j	ENSSSCT00000030512	ENSSSCG00000004081	1:13715266-14114465	22489
TCONS_00000213	j	ENSSSCT00000030512	ENSSSCG00000004081	1:13715266-14114465	22434
TCONS_00000214	j	ENSSSCT00000030512	ENSSSCG00000004081	1:13715266-14114465	22598
TCONS_00000215	=	ENSSSCT00000030512	ENSSSCG00000004081	1:13715671-14042954	5164
TCONS_00000216	=	ENSSSCT00000004510	ENSSSCG00000004081	1:13723380-13913640	4830
TCONS_00000217	j	ENSSSCT00000050808	ENSSSCG00000031744	1:14018538-14114465	5952
TCONS_00000218	j	ENSSSCT00000050808	ENSSSCG00000031744	1:14018667-14091957	3935
TCONS_00000219	=	ENSSSCT00000037074	ENSSSCG00000034008	1:14018716-14019955	345
TCONS_00000220	j	ENSSSCT00000031249	ENSSSCG00000021273	1:14018823-14038375	932
TCONS_00000221	=	ENSSSCT00000031249	ENSSSCG00000021273	1:14022554-14032889	831
TCONS_00000222	=	ENSSSCT00000050808	ENSSSCG00000031744	1:14070068-14091908	1452
TCONS_00000223	j	ENSSSCT00000004511	ENSSSCG00000004082	1:14114841-14185078	3570
TCONS_00000224	j	ENSSSCT00000004511	ENSSSCG00000004082	1:14114841-14201703	4836
TCONS_00000225	j	ENSSSCT00000004511	ENSSSCG00000004082	1:14114841-14201703	4905
TCONS_00000226	j	ENSSSCT00000004511	ENSSSCG00000004082	1:14134224-14185078	2752
TCONS_00000227	j	ENSSSCT00000004511	ENSSSCG00000004082	1:14134315-14201703	3927
TCONS_00000228	j	ENSSSCT00000004511	ENSSSCG00000004082	1:14151445-14201703	3771
TCONS_00000229	=	ENSSSCT00000004511	ENSSSCG00000004082	1:14151445-14201703	3702
TCONS_00000230	j	ENSSSCT00000004520	RMND1	1:14794908-14802006	1711
TCONS_00000231	=	ENSSSCT00000004520	RMND1	1:14794908-14851848	2323
TCONS_00000232	=	ENSSSCT00000066077	RMND1	1:14794908-14851848	2323
TCONS_00000233	j	ENSSSCT00000004520	RMND1	1:14794908-14852015	2704
TCONS_00000234	j	ENSSSCT00000004520	RMND1	1:14794908-14852015	2387
TCONS_00000235	j	ENSSSCT00000004520	RMND1	1:14794908-14852015	2516
TCONS_00000236	j	ENSSSCT00000004520	RMND1	1:14794908-14852015	2387
TCONS_00000237	j	ENSSSCT00000004520	RMND1	1:14796964-14852015	1721
TCONS_00000238	j	ENSSSCT00000059490	ZBTB2	1:14864014-14897541	7903
TCONS_00000240	j	ENSSSCT00000059490	ZBTB2	1:14864014-14897541	8455
TCONS_00000241	=	ENSSSCT00000059490	ZBTB2	1:14865918-14897541	6509
TCONS_00000242	=	ENSSSCT00000004521	ZBTB2	1:14866059-14894954	3086
TCONS_00000243	=	ENSSSCT00000028147	RF00319	1:15357030-15357214	184
TCONS_00000244	=	ENSSSCT00000044531	ENSSSCG00000040966	1:15730879-15731372	468
TCONS_00000245	=	ENSSSCT00000042802	ENSSSCG00000035574	1:16007575-16012892	936
TCONS_00000246	j	ENSSSCT00000053471	ENSSSCG00000032525	1:16022358-16027727	2315
TCONS_00000247	j	ENSSSCT00000050027	ENSSSCG00000033578	1:16022358-16050266	3938
TCONS_00000248	=	ENSSSCT00000053471	ENSSSCG00000032525	1:16023145-16025005	1294
TCONS_00000249	j	ENSSSCT00000053471	ENSSSCG00000032525	1:16023145-16027727	2773
TCONS_00000250	=	ENSSSCT00000050027	ENSSSCG00000033578	1:16043120-16050266	4029
TCONS_00000251	=	ENSSSCT00000054854	LRP11	1:16138872-16197219	2011
TCONS_00000252	=	ENSSSCT00000062003	LRP11	1:16138872-16197219	2254
TCONS_00000253	j	ENSSSCT00000062003	LRP11	1:16138872-16198970	4047
TCONS_00000254	=	ENSSSCT00000004536	LRP11	1:16139238-16198970	3603
TCONS_00000255	=	ENSSSCT00000040266	LRP11	1:16148936-16197219	1032
TCONS_00000256	=	ENSSSCT00000052785	NUP43	1:16249611-16267634	5340
TCONS_00000257	j	ENSSSCT00000052785	NUP43	1:16249611-16267703	5756
TCONS_00000258	j	ENSSSCT00000052785	NUP43	1:16249611-16267703	5331
TCONS_00000259	=	ENSSSCT00000004540	NUP43	1:16251839-16265318	1065
TCONS_00000260	j	ENSSSCT00000052785	NUP43	1:16261309-16267703	2644
TCONS_00000261	=	ENSSSCT00000004541	LATS1	1:16274842-16320604	7151
TCONS_00000263	=	ENSSSCT00000064835	LATS1	1:16282616-16321581	7804
TCONS_00000264	=	ENSSSCT00000004539	KATNA1	1:16330846-16360800	1967
TCONS_00000267	j	ENSSSCT00000023948	KATNA1	1:16330846-16362141	4218
TCONS_00000268	=	ENSSSCT00000023948	KATNA1	1:16330914-16360800	1991
TCONS_00000269	=	ENSSSCT00000024741	PPIL4	1:16400962-16446849	5275
TCONS_00000270	j	ENSSSCT00000024741	PPIL4	1:16407248-16446849	5212
TCONS_00000271	=	ENSSSCT00000056550	ZC3H12D	1:16463707-16501366	5144
TCONS_00000272	=	ENSSSCT00000004544	ZC3H12D	1:16465235-16498971	2669
TCONS_00000273	x	ENSSSCT00000059358	STXBP5	1:18511354-18712488	1251
TCONS_00000274	j	ENSSSCT00000039335	SHPRH	1:19612822-19626440	1686
TCONS_00000275	j	ENSSSCT00000039335	SHPRH	1:19612822-19636420	3586
TCONS_00000276	j	ENSSSCT00000039335	SHPRH	1:19612822-19644996	4229
TCONS_00000277	=	ENSSSCT00000004555	SHPRH	1:19612822-19693402	5356
TCONS_00000278	=	ENSSSCT00000039335	SHPRH	1:19612822-19693402	5107
TCONS_00000279	j	ENSSSCT00000039335	SHPRH	1:19612822-19697336	9339
TCONS_00000280	j	ENSSSCT00000039335	SHPRH	1:19612822-19697336	9420
TCONS_00000281	=	ENSSSCT00000060565	SHPRH	1:19612915-19695273	7215
TCONS_00000282	j	ENSSSCT00000039335	SHPRH	1:19612997-19697336	9102
TCONS_00000283	=	ENSSSCT00000044986	SHPRH	1:19613202-19695244	7112
TCONS_00000284	j	ENSSSCT00000039335	SHPRH	1:19624087-19697336	8424
TCONS_00000285	j	ENSSSCT00000039335	SHPRH	1:19624091-19697336	8339
TCONS_00000286	j	ENSSSCT00000039335	SHPRH	1:19630075-19636420	2325
TCONS_00000287	-	-	-	1:19724481-19725362	881
TCONS_00000289	j	ENSSSCT00000064623	FBXO30	1:19747149-19842578	11364
TCONS_00000290	=	ENSSSCT00000043635	FBXO30	1:19755719-19770720	2440
TCONS_00000291	=	ENSSSCT00000059678	FBXO30	1:19756183-19882802	2859
TCONS_00000292	=	ENSSSCT00000064623	FBXO30	1:19756183-20024398	2763
TCONS_00000293	=	ENSSSCT00000041085	FBXO30	1:19756237-19777618	9241
TCONS_00000294	=	ENSSSCT00000047736	FBXO30	1:19756287-19892090	4030
TCONS_00000295	=	ENSSSCT00000004556	FBXO30	1:19756375-19775639	7246
TCONS_00000296	=	ENSSSCT00000040676	FBXO30	1:19760405-19775639	11244
TCONS_00000298	j	ENSSSCT00000064623	FBXO30	1:19760405-20024398	6691
TCONS_00000299	=	ENSSSCT00000004557	FBXO30	1:19806672-19893339	3590
TCONS_00000300	=	ENSSSCT00000058130	ENSSSCG00000033962	1:20890273-20890516	243
TCONS_00000301	-	-	-	1:21113542-21114941	957
TCONS_00000302	=	ENSSSCT00000043535	SF3B5	1:21231285-21232011	617
TCONS_00000303	=	ENSSSCT00000058859	PLAGL1	1:21303993-21370628	2882
TCONS_00000304	j	ENSSSCT00000058859	PLAGL1	1:21303993-21371067	3020
TCONS_00000305	j	ENSSSCT00000058859	PLAGL1	1:21303993-21371067	2988
TCONS_00000306	j	ENSSSCT00000058859	PLAGL1	1:21303993-21371067	3353
TCONS_00000307	j	ENSSSCT00000058859	PLAGL1	1:21308805-21342010	1064
TCONS_00000308	j	ENSSSCT00000058859	PLAGL1	1:21309223-21371067	3036
TCONS_00000309	j	ENSSSCT00000058859	PLAGL1	1:21309224-21371067	3077
TCONS_00000310	j	ENSSSCT00000058859	PLAGL1	1:21309255-21371067	7553
TCONS_00000311	=	ENSSSCT00000004562	PLAGL1	1:21327543-21370631	2682
TCONS_00000312	j	ENSSSCT00000058859	PLAGL1	1:21335771-21371067	4324
TCONS_00000313	j	ENSSSCT00000058859	PLAGL1	1:21345124-21371067	8044
TCONS_00000314	=	ENSSSCT00000060952	PLAGL1	1:21346380-21371067	6455
TCONS_00000315	=	ENSSSCT00000056848	PLAGL1	1:21365164-21369871	1514
TCONS_00000316	=	ENSSSCT00000061187	ENSSSCG00000040918	1:21406936-21409950	3014
TCONS_00000318	=	ENSSSCT00000042139	ENSSSCG00000039614	1:21421367-21426638	222
TCONS_00000319	=	ENSSSCT00000004568	FUCA2	1:21742271-21763519	3355
TCONS_00000320	j	ENSSSCT00000048579	ADAT2	1:21801559-21814721	442
TCONS_00000321	=	ENSSSCT00000048579	ADAT2	1:21801559-21824435	1952
TCONS_00000322	-	-	-	1:21831885-21833226	780
TCONS_00000324	j	ENSSSCT00000056296	HIVEP2	1:22241216-22437257	10219
TCONS_00000325	=	ENSSSCT00000056296	HIVEP2	1:22241306-22436130	9077
TCONS_00000326	j	ENSSSCT00000056296	HIVEP2	1:22241725-22437257	10100
TCONS_00000327	j	ENSSSCT00000056296	HIVEP2	1:22241877-22437257	10023
TCONS_00000328	=	ENSSSCT00000054067	HIVEP2	1:22352135-22435306	7867
TCONS_00000330	=	ENSSSCT00000004573	HIVEP2	1:22412431-22436439	9204
TCONS_00000331	=	ENSSSCT00000042834	NMBR	1:22971976-22991686	5256
TCONS_00000332	=	ENSSSCT00000048004	RF00026	1:24997897-24998004	107
TCONS_00000334	j	ENSSSCT00000004577	CITED2	1:25155218-25162193	6136
TCONS_00000335	j	ENSSSCT00000004577	CITED2	1:25155227-25162193	6044
TCONS_00000336	=	ENSSSCT00000055465	CITED2	1:25155663-25160264	4139
TCONS_00000337	=	ENSSSCT00000004577	CITED2	1:25156036-25158044	1761
TCONS_00000338	=	ENSSSCT00000050649	CITED2	1:25156161-25162193	5856
TCONS_00000339	j	ENSSSCT00000064833	TXLNB	1:25228332-25233117	1721
TCONS_00000340	j	ENSSSCT00000064833	TXLNB	1:25228332-25272473	3300
TCONS_00000341	=	ENSSSCT00000004578	TXLNB	1:25228332-25282893	2330
TCONS_00000342	=	ENSSSCT00000064833	TXLNB	1:25228614-25285301	4576
TCONS_00000343	j	ENSSSCT00000064833	TXLNB	1:25264481-25267624	1372
TCONS_00000344	j	ENSSSCT00000064833	TXLNB	1:25280453-25286065	4490
TCONS_00000345	-	-	-	1:25287633-25288703	1070
TCONS_00000346	-	-	-	1:25288908-25290642	1734
TCONS_00000347	-	-	-	1:25290763-25297919	7156
TCONS_00000348	-	-	-	1:25298621-25301016	2395
TCONS_00000349	-	-	-	1:25301299-25303443	2144
TCONS_00000350	-	-	-	1:25304579-25306553	1974
TCONS_00000351	=	ENSSSCT00000033622	REPS1	1:25480922-25565080	2994
TCONS_00000352	=	ENSSSCT00000056258	REPS1	1:25480922-25565080	3075
TCONS_00000353	j	ENSSSCT00000004582	REPS1	1:25480922-25565277	3140
TCONS_00000354	j	ENSSSCT00000004582	REPS1	1:25480922-25565277	3155
TCONS_00000355	=	ENSSSCT00000004582	REPS1	1:25481342-25565277	2816
TCONS_00000356	j	ENSSSCT00000004582	REPS1	1:25543169-25565277	1948
TCONS_00000357	j	ENSSSCT00000004582	REPS1	1:25550970-25565277	1484
TCONS_00000358	j	ENSSSCT00000004582	REPS1	1:25550970-25565277	1481
TCONS_00000359	=	ENSSSCT00000052552	NHSL1	1:25736369-25986510	4932
TCONS_00000360	j	ENSSSCT00000037006	NHSL1	1:25736369-25988645	6935
TCONS_00000361	j	ENSSSCT00000037006	NHSL1	1:25736369-25988645	7073
TCONS_00000363	j	ENSSSCT00000037006	NHSL1	1:25846877-25988645	12833
TCONS_00000364	=	ENSSSCT00000047086	NHSL1	1:25852031-25987833	6861
TCONS_00000365	j	ENSSSCT00000037006	NHSL1	1:25852031-25988645	7547
TCONS_00000366	=	ENSSSCT00000043821	NHSL1	1:25879085-25987837	5963
TCONS_00000368	j	ENSSSCT00000037006	NHSL1	1:25919823-25925779	1753
TCONS_00000369	=	ENSSSCT00000037006	NHSL1	1:25920285-25988643	7050
TCONS_00000370	=	ENSSSCT00000004585	NHSL1	1:25920298-25988645	6901
TCONS_00000371	=	ENSSSCT00000063827	NHSL1	1:25948681-25988645	7221
TCONS_00000372	j	ENSSSCT00000037006	NHSL1	1:25966387-25988645	9167
TCONS_00000373	=	ENSSSCT00000021979	RF00156	1:25991387-25991508	121
TCONS_00000374	=	ENSSSCT00000046807	RF00026	1:26037661-26037765	104
TCONS_00000375	=	ENSSSCT00000004588	ENSSSCG00000004151	1:26043664-26044123	459
TCONS_00000376	=	ENSSSCT00000051639	PERP	1:26301212-26317883	2093
TCONS_00000377	-	-	-	1:26509648-26519621	599
TCONS_00000378	=	ENSSSCT00000004593	OLIG3	1:26800670-26801489	819
TCONS_00000379	=	ENSSSCT00000004594	IFNGR1	1:27036891-27061093	5583
TCONS_00000380	j	ENSSSCT00000034018	IFNGR1	1:27036891-27061188	5559
TCONS_00000381	j	ENSSSCT00000034018	IFNGR1	1:27036971-27061188	5206
TCONS_00000382	=	ENSSSCT00000034018	IFNGR1	1:27037158-27061093	5226
TCONS_00000383	j	ENSSSCT00000034018	IFNGR1	1:27049786-27061188	6326
TCONS_00000384	=	ENSSSCT00000004597	IL22RA2	1:27077945-27090235	678
TCONS_00000385	=	ENSSSCT00000004596	IL20RA	1:27137491-27173997	3839
TCONS_00000386	=	ENSSSCT00000021974	RF00026	1:27335793-27335889	96
TCONS_00000387	j	ENSSSCT00000063024	MAP3K5	1:27379920-27459815	2007
TCONS_00000389	=	ENSSSCT00000056666	MAP3K5	1:27380143-27600496	5523
TCONS_00000390	=	ENSSSCT00000063024	MAP3K5	1:27380861-27599792	4278
TCONS_00000391	=	ENSSSCT00000025418	MAP3K5	1:27387916-27599792	3763
TCONS_00000392	j	ENSSSCT00000063024	MAP3K5	1:27387916-27600839	4987
TCONS_00000394	j	ENSSSCT00000063024	MAP3K5	1:27472254-27516857	1999
TCONS_00000395	j	ENSSSCT00000063024	MAP3K5	1:27472254-27600839	4981
TCONS_00000396	j	ENSSSCT00000063024	MAP3K5	1:27519294-27600839	7143
TCONS_00000397	j	ENSSSCT00000046954	MAP7	1:27606045-27782893	3885
TCONS_00000398	=	ENSSSCT00000046954	MAP7	1:27606053-27782750	3737
TCONS_00000399	j	ENSSSCT00000046954	MAP7	1:27606053-27782893	5102
TCONS_00000400	j	ENSSSCT00000046954	MAP7	1:27606053-27782893	4991
TCONS_00000401	j	ENSSSCT00000046954	MAP7	1:27606053-27782893	3769
TCONS_00000402	=	ENSSSCT00000038446	MAP7	1:27606069-27782732	3589
TCONS_00000403	=	ENSSSCT00000065529	MAP7	1:27632593-27782034	3644
TCONS_00000404	j	ENSSSCT00000046954	MAP7	1:27632593-27782893	4392
TCONS_00000405	j	ENSSSCT00000046954	MAP7	1:27679108-27782893	4162
TCONS_00000406	=	ENSSSCT00000062995	MAP7	1:27679590-27781280	2178
TCONS_00000407	j	ENSSSCT00000048439	BCLAF1	1:27869764-27892881	7370
TCONS_00000408	j	ENSSSCT00000048439	BCLAF1	1:27869764-27903875	10877
TCONS_00000409	j	ENSSSCT00000048439	BCLAF1	1:27869764-27903875	11046
TCONS_00000410	j	ENSSSCT00000048439	BCLAF1	1:27869764-27903875	10883
TCONS_00000411	j	ENSSSCT00000048439	BCLAF1	1:27869764-27903875	10893
TCONS_00000412	=	ENSSSCT00000058049	BCLAF1	1:27872182-27902973	5607
TCONS_00000413	=	ENSSSCT00000004602	BCLAF1	1:27872182-27902975	5756
TCONS_00000414	j	ENSSSCT00000048439	BCLAF1	1:27872182-27903875	6694
TCONS_00000415	=	ENSSSCT00000048439	BCLAF1	1:27872249-27903373	5889
TCONS_00000416	=	ENSSSCT00000043883	BCLAF1	1:27878431-27903486	6378
TCONS_00000417	=	ENSSSCT00000060649	BCLAF1	1:27878431-27903486	5970
TCONS_00000418	j	ENSSSCT00000048439	BCLAF1	1:27878431-27903875	5846
TCONS_00000419	=	ENSSSCT00000037556	BCLAF1	1:27880552-27919899	2763
TCONS_00000420	j	ENSSSCT00000048439	BCLAF1	1:27886780-27903875	4578
TCONS_00000421	j	ENSSSCT00000048439	BCLAF1	1:27893117-27903875	10723
TCONS_00000422	=	ENSSSCT00000004603	MTFR2	1:27908781-27927480	4320
TCONS_00000423	x	ENSSSCT00000065157	PDE7B	1:28035868-28047897	12029
TCONS_00000424	x	ENSSSCT00000065157	PDE7B	1:28193021-28197650	4629
TCONS_00000426	=	ENSSSCT00000060052	RF00156	1:28258953-28262253	3300
TCONS_00000427	j	ENSSSCT00000004605	AHI1	1:28566396-28597109	1173
TCONS_00000428	j	ENSSSCT00000004605	AHI1	1:28566396-28623908	2584
TCONS_00000429	j	ENSSSCT00000004605	AHI1	1:28566396-28645006	3244
TCONS_00000430	j	ENSSSCT00000004605	AHI1	1:28566396-28744785	4256
TCONS_00000431	=	ENSSSCT00000004605	AHI1	1:28566396-28760468	5109
TCONS_00000432	j	ENSSSCT00000004605	AHI1	1:28566396-28762381	6565
TCONS_00000433	j	ENSSSCT00000004605	AHI1	1:28566396-28762381	7184
TCONS_00000435	j	ENSSSCT00000004605	AHI1	1:28566396-28762381	6836
TCONS_00000436	j	ENSSSCT00000004605	AHI1	1:28566396-28762381	6859
TCONS_00000437	j	ENSSSCT00000004605	AHI1	1:28566396-28762381	6954
TCONS_00000438	=	ENSSSCT00000062806	AHI1	1:28566907-28754562	3533
TCONS_00000439	=	ENSSSCT00000040870	AHI1	1:28566907-28759126	3508
TCONS_00000440	=	ENSSSCT00000058434	AHI1	1:28566907-28759126	3622
TCONS_00000441	=	ENSSSCT00000057650	AHI1	1:28573887-28754562	3652
TCONS_00000442	=	ENSSSCT00000065502	AHI1	1:28586596-28760468	4686
TCONS_00000443	=	ENSSSCT00000036796	AHI1	1:28586610-28759126	2973
TCONS_00000444	=	ENSSSCT00000060523	AHI1	1:28586610-28759126	3024
TCONS_00000445	=	ENSSSCT00000057712	AHI1	1:28586610-28762381	6543
TCONS_00000446	j	ENSSSCT00000038230	HBS1L	1:28968818-28985442	1997
TCONS_00000447	j	ENSSSCT00000038230	HBS1L	1:28968818-29055581	6337
TCONS_00000448	=	ENSSSCT00000004608	HBS1L	1:28968843-29052295	2601
TCONS_00000449	=	ENSSSCT00000048916	HBS1L	1:28968843-29052418	2748
TCONS_00000450	j	ENSSSCT00000038230	HBS1L	1:28968848-29055581	5877
TCONS_00000451	j	ENSSSCT00000038230	HBS1L	1:28968849-29055581	5761
TCONS_00000452	=	ENSSSCT00000038230	HBS1L	1:28968855-29052420	3035
TCONS_00000453	=	ENSSSCT00000038791	HBS1L	1:28968958-29055581	5632
TCONS_00000454	=	ENSSSCT00000060427	HBS1L	1:28968958-29055581	5877
TCONS_00000455	=	ENSSSCT00000061209	HBS1L	1:28968958-29055581	5733
TCONS_00000456	=	ENSSSCT00000029261	ALDH8A1	1:29060743-29079324	1471
TCONS_00000457	=	ENSSSCT00000062973	SGK1	1:29625956-29753600	3073
TCONS_00000458	j	ENSSSCT00000062973	SGK1	1:29625956-29753666	3284
TCONS_00000459	j	ENSSSCT00000062973	SGK1	1:29625956-29753666	3725
TCONS_00000460	=	ENSSSCT00000037228	SGK1	1:29724074-29753600	2443
TCONS_00000461	=	ENSSSCT00000058706	SGK1	1:29745086-29753602	2474
TCONS_00000462	=	ENSSSCT00000037646	SGK1	1:29745113-29753599	2770
TCONS_00000463	j	ENSSSCT00000062973	SGK1	1:29745418-29753666	4120
TCONS_00000464	=	ENSSSCT00000039329	SGK1	1:29745419-29753601	3939
TCONS_00000465	j	ENSSSCT00000062973	SGK1	1:29745419-29753666	4267
TCONS_00000466	=	ENSSSCT00000027054	SGK1	1:29747844-29753666	2505
TCONS_00000467	=	ENSSSCT00000004611	SLC2A12	1:29835666-29898011	2236
TCONS_00000468	=	ENSSSCT00000050000	SLC2A12	1:29836093-29901991	5857
TCONS_00000469	j	ENSSSCT00000050000	SLC2A12	1:29842327-29901993	5708
TCONS_00000470	=	ENSSSCT00000053756	SLC2A12	1:29842327-29901993	5886
TCONS_00000471	j	ENSSSCT00000004617	SLC18B1	1:30923523-30938556	2659
TCONS_00000472	j	ENSSSCT00000004617	SLC18B1	1:30923523-30957745	7103
TCONS_00000473	=	ENSSSCT00000004617	SLC18B1	1:30923523-30957745	7021
TCONS_00000474	j	ENSSSCT00000004617	SLC18B1	1:30948342-30957745	6482
TCONS_00000475	j	ENSSSCT00000004618	VNN2	1:30961377-30970895	2229
TCONS_00000476	j	ENSSSCT00000004618	VNN2	1:30961377-30970895	2273
TCONS_00000477	j	ENSSSCT00000004618	VNN2	1:30961554-30970895	2133
TCONS_00000478	j	ENSSSCT00000004618	VNN2	1:30961593-30970895	2015
TCONS_00000479	j	ENSSSCT00000004618	VNN2	1:30961609-30970895	2406
TCONS_00000480	=	ENSSSCT00000004618	VNN2	1:30962711-30970544	1521
TCONS_00000481	j	ENSSSCT00000004619	ENSSSCG00000004180	1:30981552-30993278	2003
TCONS_00000482	=	ENSSSCT00000004619	ENSSSCG00000004180	1:30981552-30993278	2196
TCONS_00000483	j	ENSSSCT00000004619	ENSSSCG00000004180	1:30987615-30993278	1839
TCONS_00000484	=	ENSSSCT00000004620	VNN1	1:31003337-31023731	1647
TCONS_00000485	=	ENSSSCT00000021373	RF00026	1:31012063-31012167	104
TCONS_00000486	=	ENSSSCT00000054090	TAAR1	1:31048534-31049551	855
TCONS_00000487	=	ENSSSCT00000004622	TAAR2	1:31073515-31074574	1059
TCONS_00000488	=	ENSSSCT00000057234	ENSSSCG00000037870	1:31083313-31087692	1020
TCONS_00000489	=	ENSSSCT00000037854	ENSSSCG00000004184	1:31094140-31098493	975
TCONS_00000490	=	ENSSSCT00000063023	ENSSSCG00000004184	1:31094634-31097120	921
TCONS_00000491	=	ENSSSCT00000047043	ENSSSCG00000004184	1:31096071-31097120	984
TCONS_00000492	=	ENSSSCT00000004623	ENSSSCG00000004184	1:31096071-31098867	1005
TCONS_00000493	=	ENSSSCT00000004624	TAAR5	1:31104141-31105153	954
TCONS_00000494	=	ENSSSCT00000056414	ENSSSCG00000037590	1:31112235-31116563	1053
TCONS_00000495	=	ENSSSCT00000038294	ENSSSCG00000037590	1:31112665-31116563	1053
TCONS_00000496	=	ENSSSCT00000040736	ENSSSCG00000037590	1:31113695-31116563	1041
TCONS_00000497	=	ENSSSCT00000056948	ENSSSCG00000040065	1:31124660-31125693	1002
TCONS_00000498	=	ENSSSCT00000004629	STX7	1:31184924-31237640	2816
TCONS_00000499	j	ENSSSCT00000004629	STX7	1:31184924-31238001	2016
TCONS_00000500	=	ENSSSCT00000020420	RF00003	1:31274986-31275154	168
TCONS_00000501	j	ENSSSCT00000004630	MOXD1	1:31282505-31347744	1611
TCONS_00000502	=	ENSSSCT00000004630	MOXD1	1:31282505-31366108	1803
TCONS_00000504	=	ENSSSCT00000059782	CTGF	1:31673797-31677691	2828
TCONS_00000505	j	ENSSSCT00000004631	CTGF	1:31673797-31680169	5720
TCONS_00000506	=	ENSSSCT00000004631	CTGF	1:31673797-31680169	5421
TCONS_00000507	=	ENSSSCT00000038588	CTGF	1:31673797-31680169	5546
TCONS_00000508	=	ENSSSCT00000004638	ENSSSCG00000004197	1:31909766-31910316	474
TCONS_00000509	j	ENSSSCT00000032585	MED23	1:31959849-32001581	5437
TCONS_00000510	j	ENSSSCT00000032585	MED23	1:31959954-31979415	3080
TCONS_00000511	j	ENSSSCT00000032585	MED23	1:31960022-31968973	1285
TCONS_00000512	j	ENSSSCT00000032585	MED23	1:31960022-32001581	6779
TCONS_00000513	j	ENSSSCT00000032585	MED23	1:31960023-32001581	5690
TCONS_00000514	=	ENSSSCT00000032585	MED23	1:31960023-32001581	5281
TCONS_00000515	=	ENSSSCT00000004637	MED23	1:31960023-32001581	5672
TCONS_00000516	=	ENSSSCT00000032585	MED23	1:31960206-32000920	4437
TCONS_00000517	=	ENSSSCT00000030957	MED23	1:31960444-32000617	4095
TCONS_00000519	j	ENSSSCT00000032585	MED23	1:31977216-32001581	4451
TCONS_00000520	=	ENSSSCT00000021690	RF00100	1:31981214-31981489	275
TCONS_00000521	j	ENSSSCT00000032585	MED23	1:31990226-32001581	3201
TCONS_00000522	j	ENSSSCT00000032585	MED23	1:31993369-32001581	2355
TCONS_00000523	j	ENSSSCT00000042776	EPB41L2	1:32417498-32586835	3768
TCONS_00000524	j	ENSSSCT00000042776	EPB41L2	1:32417498-32595550	4628
TCONS_00000525	j	ENSSSCT00000042776	EPB41L2	1:32417498-32600181	5216
TCONS_00000526	=	ENSSSCT00000043663	EPB41L2	1:32417498-32612982	3957
TCONS_00000527	=	ENSSSCT00000024281	EPB41L2	1:32417908-32612982	3895
TCONS_00000528	j	ENSSSCT00000042776	EPB41L2	1:32418008-32586835	2868
TCONS_00000529	j	ENSSSCT00000042776	EPB41L2	1:32418008-32630639	4645
TCONS_00000530	j	ENSSSCT00000042776	EPB41L2	1:32418178-32630639	4643
TCONS_00000531	j	ENSSSCT00000042776	EPB41L2	1:32418216-32586835	2661
TCONS_00000532	=	ENSSSCT00000004640	EPB41L2	1:32418216-32630638	4424
TCONS_00000533	=	ENSSSCT00000040415	EPB41L2	1:32418216-32630639	4216
TCONS_00000534	=	ENSSSCT00000065387	EPB41L2	1:32418647-32630639	4321
TCONS_00000535	=	ENSSSCT00000042776	EPB41L2	1:32418654-32630638	4505
TCONS_00000536	=	ENSSSCT00000050067	EPB41L2	1:32418683-32630638	4503
TCONS_00000537	=	ENSSSCT00000037764	EPB41L2	1:32418684-32630638	4292
TCONS_00000538	=	ENSSSCT00000050899	EPB41L2	1:32418715-32630638	4209
TCONS_00000539	=	ENSSSCT00000040347	EPB41L2	1:32504736-32630637	4466
TCONS_00000540	j	ENSSSCT00000042776	EPB41L2	1:32589878-32630639	3229
TCONS_00000541	j	ENSSSCT00000042776	EPB41L2	1:32629186-32630639	1317
TCONS_00000542	=	ENSSSCT00000004643	SAMD3	1:33146523-33195550	1942
TCONS_00000543	=	ENSSSCT00000065444	SAMD3	1:33147919-33196046	2627
TCONS_00000544	=	ENSSSCT00000043551	SAMD3	1:33149087-33196046	2481
TCONS_00000545	j	ENSSSCT00000004643	SAMD3	1:33149459-33174174	1067
TCONS_00000546	=	ENSSSCT00000057193	SAMD3	1:33149459-33196046	2287
TCONS_00000547	=	ENSSSCT00000004645	TMEM244	1:33470250-33492702	703
TCONS_00000548	=	ENSSSCT00000047609	ARHGAP18	1:33527734-33717964	3786
TCONS_00000549	j	ENSSSCT00000047609	ARHGAP18	1:33583331-33718891	4504
TCONS_00000550	=	ENSSSCT00000038797	ARHGAP18	1:33583405-33717964	4449
TCONS_00000551	=	ENSSSCT00000004646	ARHGAP18	1:33583492-33684274	1173
TCONS_00000552	=	ENSSSCT00000004647	ARHGAP18	1:33617495-33716546	1902
TCONS_00000553	=	ENSSSCT00000064357	ARHGAP18	1:33631668-33717965	3390
TCONS_00000554	j	ENSSSCT00000054145	PTPRK	1:34692618-35258784	6836
TCONS_00000555	=	ENSSSCT00000038851	PTPRK	1:34692714-35221518	3538
TCONS_00000556	=	ENSSSCT00000060259	PTPRK	1:34692714-35257274	5356
TCONS_00000557	=	ENSSSCT00000062128	PTPRK	1:34692714-35257274	4927
TCONS_00000558	=	ENSSSCT00000054145	PTPRK	1:34692714-35258034	8979
TCONS_00000559	=	ENSSSCT00000038730	PTPRK	1:34692714-35258701	6723
TCONS_00000560	=	ENSSSCT00000063294	PTPRK	1:34692714-35258701	9574
TCONS_00000561	=	ENSSSCT00000004650	PTPRK	1:34693366-35258700	6082
TCONS_00000562	=	ENSSSCT00000063865	PTPRK	1:34693402-35258697	5983
TCONS_00000563	=	ENSSSCT00000042817	THEMIS	1:35333472-35521353	3755
TCONS_00000564	=	ENSSSCT00000030479	THEMIS	1:35333494-35521348	3414
TCONS_00000565	=	ENSSSCT00000064036	ENSSSCG00000031145	1:35422558-35506110	306
TCONS_00000566	=	ENSSSCT00000004653	C6orf58	1:35600112-35621314	1604
TCONS_00000567	=	ENSSSCT00000056832	RF00026	1:35685927-35686034	107
TCONS_00000568	=	ENSSSCT00000061940	ENSSSCG00000038602	1:35694268-35769838	5644
TCONS_00000569	j	ENSSSCT00000004658	ENSSSCG00000038602	1:35694268-35778966	10548
TCONS_00000570	=	ENSSSCT00000004658	ENSSSCG00000038602	1:35696401-35775062	6308
TCONS_00000571	=	ENSSSCT00000048885	KIAA0408	1:35756781-35778966	7312
TCONS_00000572	j	ENSSSCT00000004658	ENSSSCG00000038602	1:35769386-35778966	6749
TCONS_00000573	j	ENSSSCT00000057506	ECHDC1	1:35852493-35892872	2344
TCONS_00000574	j	ENSSSCT00000057506	ECHDC1	1:35852493-35911541	5308
TCONS_00000575	=	ENSSSCT00000057506	ECHDC1	1:35852493-35911541	5361
TCONS_00000577	=	ENSSSCT00000004659	ECHDC1	1:35863410-35909308	2311
TCONS_00000578	=	ENSSSCT00000047133	ENSSSCG00000031772	1:36993701-37043588	237
TCONS_00000579	=	ENSSSCT00000051054	ENSSSCG00000040231	1:37588851-37589028	177
TCONS_00000580	j	ENSSSCT00000004669	HDDC2	1:37640647-37660705	1469
TCONS_00000581	j	ENSSSCT00000004669	HDDC2	1:37640647-37660705	1189
TCONS_00000582	j	ENSSSCT00000004669	HDDC2	1:37640662-37660705	1268
TCONS_00000583	=	ENSSSCT00000004669	HDDC2	1:37640672-37660335	897
TCONS_00000584	=	ENSSSCT00000020669	RF00100	1:37953035-37953350	315
TCONS_00000585	=	ENSSSCT00000062651	ENSSSCG00000036671	1:39027472-39578423	1031
TCONS_00000586	=	ENSSSCT00000029492	ENSSSCG00000027613	1:39180525-39339224	1540
TCONS_00000587	=	ENSSSCT00000062814	RF00026	1:39224795-39224902	107
TCONS_00000588	=	ENSSSCT00000060099	ENSSSCG00000039357	1:39862069-39893386	135
TCONS_00000589	=	ENSSSCT00000004680	ENSSSCG00000004235	1:39890907-39896309	1473
TCONS_00000590	x	ENSSSCT00000052160	PKIB	1:40022841-40029663	879
TCONS_00000591	-	-	-	1:40028952-40030774	359
TCONS_00000592	=	ENSSSCT00000059055	SERINC1	1:40099185-40140304	3850
TCONS_00000594	=	ENSSSCT00000004682	SERINC1	1:40099389-40141544	2876
TCONS_00000595	=	ENSSSCT00000044335	ENSSSCG00000037157	1:40965030-40965231	201
TCONS_00000596	j	ENSSSCT00000004689	TBC1D32	1:41057290-41128031	4821
TCONS_00000597	=	ENSSSCT00000060707	TBC1D32	1:41057290-41261858	4273
TCONS_00000598	j	ENSSSCT00000004689	TBC1D32	1:41057290-41263620	6315
TCONS_00000599	=	ENSSSCT00000004689	TBC1D32	1:41057785-41263561	5766
TCONS_00000600	j	ENSSSCT00000004689	TBC1D32	1:41096574-41179528	3642
TCONS_00000601	=	ENSSSCT00000041262	TBC1D32	1:41096574-41261858	3824
TCONS_00000602	j	ENSSSCT00000004689	TBC1D32	1:41134867-41263620	4649
TCONS_00000603	j	ENSSSCT00000004689	TBC1D32	1:41163681-41179528	1319
TCONS_00000604	j	ENSSSCT00000004689	TBC1D32	1:41163681-41263620	3502
TCONS_00000605	j	ENSSSCT00000004689	TBC1D32	1:41163681-41263620	3507
TCONS_00000606	=	ENSSSCT00000004690	ENSSSCG00000004243	1:42541795-42545383	1074
TCONS_00000607	=	ENSSSCT00000064111	ENSSSCG00000004243	1:42544247-42545383	1044
TCONS_00000608	j	ENSSSCT00000047113	MAN1A1	1:42729675-42896291	7328
TCONS_00000609	j	ENSSSCT00000047113	MAN1A1	1:42729721-42731895	1965
TCONS_00000610	j	ENSSSCT00000047113	MAN1A1	1:42729721-42773666	2899
TCONS_00000611	j	ENSSSCT00000047113	MAN1A1	1:42729721-42788150	2030
TCONS_00000612	j	ENSSSCT00000047113	MAN1A1	1:42729721-42826380	3344
TCONS_00000613	=	ENSSSCT00000047113	MAN1A1	1:42729721-42896283	4940
TCONS_00000614	=	ENSSSCT00000004691	MAN1A1	1:42729753-42896291	5125
TCONS_00000615	j	ENSSSCT00000047113	MAN1A1	1:42782834-42896291	3776
TCONS_00000616	j	ENSSSCT00000047113	MAN1A1	1:42867248-42896291	4055
TCONS_00000617	j	ENSSSCT00000047113	MAN1A1	1:42873330-42896291	5806
TCONS_00000618	j	ENSSSCT00000058756	FAM184A	1:43003349-43071466	3178
TCONS_00000619	j	ENSSSCT00000058756	FAM184A	1:43003349-43108279	3792
TCONS_00000620	=	ENSSSCT00000004692	FAM184A	1:43003349-43113371	4311
TCONS_00000621	=	ENSSSCT00000037145	FAM184A	1:43003349-43113371	4113
TCONS_00000622	=	ENSSSCT00000046216	FAM184A	1:43003349-43113371	4164
TCONS_00000623	=	ENSSSCT00000058756	FAM184A	1:43003349-43113371	4353
TCONS_00000624	j	ENSSSCT00000058756	FAM184A	1:43003349-43113630	4778
TCONS_00000625	j	ENSSSCT00000058756	FAM184A	1:43003349-43113630	4465
TCONS_00000626	j	ENSSSCT00000058756	FAM184A	1:43058278-43113630	2379
TCONS_00000627	=	ENSSSCT00000004693	ENSSSCG00000004246	1:43171886-43198297	1519
TCONS_00000628	j	ENSSSCT00000045320	ENSSSCG00000039084	1:43171886-43268329	6389
TCONS_00000629	j	ENSSSCT00000045320	ENSSSCG00000039084	1:43171886-43268329	6391
TCONS_00000630	j	ENSSSCT00000045320	ENSSSCG00000039084	1:43171886-43268329	6070
TCONS_00000631	x	ENSSSCT00000004694	ASF1A	1:43228706-43231861	3155
TCONS_00000632	=	ENSSSCT00000045320	ENSSSCG00000039084	1:43258484-43265580	1551
TCONS_00000633	-	-	-	1:43276504-43282810	1111
TCONS_00000634	j	ENSSSCT00000004696	CEP85L	1:43392667-43441920	1602
TCONS_00000636	=	ENSSSCT00000004696	CEP85L	1:43392974-43559423	2403
TCONS_00000637	j	ENSSSCT00000004696	CEP85L	1:43438205-43563631	9031
TCONS_00000638	j	ENSSSCT00000004696	CEP85L	1:43526119-43563631	5643
TCONS_00000639	j	ENSSSCT00000004696	CEP85L	1:43550911-43563631	5265
TCONS_00000640	j	ENSSSCT00000004696	CEP85L	1:43553488-43563631	5124
TCONS_00000642	j	ENSSSCT00000059612	GOPC	1:44239363-44275646	1748
TCONS_00000643	=	ENSSSCT00000059612	GOPC	1:44239363-44287001	5910
TCONS_00000644	j	ENSSSCT00000059612	GOPC	1:44239363-44287678	6287
TCONS_00000645	j	ENSSSCT00000059612	GOPC	1:44239363-44287678	6476
TCONS_00000646	=	ENSSSCT00000046257	GOPC	1:44239365-44287001	5884
TCONS_00000647	=	ENSSSCT00000054920	GOPC	1:44239382-44285220	3975
TCONS_00000648	=	ENSSSCT00000004701	GOPC	1:44239606-44282726	1203
TCONS_00000649	=	ENSSSCT00000029401	ROS1	1:44409508-44533146	7875
TCONS_00000650	=	ENSSSCT00000041797	ROS1	1:44430872-44534874	8448
TCONS_00000651	=	ENSSSCT00000020721	RF00026	1:44836935-44837050	115
TCONS_00000652	=	ENSSSCT00000052581	GPRC6A	1:44853936-44878393	8070
TCONS_00000653	j	ENSSSCT00000058714	FAM162B	1:44889832-44897568	1026
TCONS_00000654	j	ENSSSCT00000058714	FAM162B	1:44889853-44897568	960
TCONS_00000655	=	ENSSSCT00000058714	FAM162B	1:44889863-44897109	495
TCONS_00000656	=	ENSSSCT00000004710	ENSSSCG00000004261	1:44899218-44899545	327
TCONS_00000657	j	ENSSSCT00000061721	ZUP1	1:44939823-44941234	508
TCONS_00000658	j	ENSSSCT00000061721	ZUP1	1:44939823-44954415	2312
TCONS_00000659	j	ENSSSCT00000061721	ZUP1	1:44939823-44962730	3223
TCONS_00000660	=	ENSSSCT00000004712	ZUP1	1:44939893-44961129	2069
TCONS_00000661	=	ENSSSCT00000061721	ZUP1	1:44939941-44962730	3101
TCONS_00000662	=	ENSSSCT00000025750	ZUP1	1:44940793-44961133	1812
TCONS_00000663	j	ENSSSCT00000061721	ZUP1	1:44944032-44962730	2393
TCONS_00000665	j	ENSSSCT00000063357	PTP4A1	1:45144486-45218748	2543
TCONS_00000666	=	ENSSSCT00000050791	PTP4A1	1:45144489-45178464	1203
TCONS_00000667	=	ENSSSCT00000026265	PTP4A1	1:45170467-45180274	2931
TCONS_00000668	j	ENSSSCT00000063357	PTP4A1	1:45170467-45181743	4475
TCONS_00000669	=	ENSSSCT00000063357	PTP4A1	1:45170502-45218748	2498
TCONS_00000670	=	ENSSSCT00000062352	PTP4A1	1:45170526-45180296	4085
TCONS_00000671	=	ENSSSCT00000054951	PTP4A1	1:45170962-45179733	5913
TCONS_00000672	=	ENSSSCT00000058723	PTP4A1	1:45171683-45181026	5369
TCONS_00000673	=	ENSSSCT00000063899	PTP4A1	1:45172131-45178464	1070
TCONS_00000674	j	ENSSSCT00000040949	PHF3	1:45219388-45270665	2811
TCONS_00000675	j	ENSSSCT00000040949	PHF3	1:45219388-45270665	2542
TCONS_00000676	=	ENSSSCT00000052268	PHF3	1:45219388-45295072	6942
TCONS_00000679	j	ENSSSCT00000040949	PHF3	1:45219388-45299477	12548
TCONS_00000680	=	ENSSSCT00000040949	PHF3	1:45219410-45296398	8515
TCONS_00000681	j	ENSSSCT00000040949	PHF3	1:45262718-45299477	11096
TCONS_00000682	=	ENSSSCT00000065506	ENSSSCG00000036232	1:45342450-45342642	192
TCONS_00000683	=	ENSSSCT00000062918	RF00026	1:48788852-48788959	107
TCONS_00000684	=	ENSSSCT00000066143	ADGRB3	1:49189826-49619712	5449
TCONS_00000685	=	ENSSSCT00000004719	ADGRB3	1:49189826-49619779	5417
TCONS_00000686	o	ENSSSCT00000004930	ENSSSCG00000004463	1:50045026-50270324	1566
TCONS_00000687	o	ENSSSCT00000004930	ENSSSCG00000004463	1:50045026-50315644	2134
TCONS_00000688	=	ENSSSCT00000004930	ENSSSCG00000004463	1:50188750-50189158	408
TCONS_00000689	-	-	-	1:50320398-50327412	669
TCONS_00000690	-	-	-	1:50320398-50348525	1005
TCONS_00000691	-	-	-	1:50320398-50348638	1032
TCONS_00000692	-	-	-	1:50352988-50372820	450
TCONS_00000693	-	-	-	1:50374469-50395169	739
TCONS_00000694	j	ENSSSCT00000064116	FAM135A	1:50579714-50647149	1279
TCONS_00000695	=	ENSSSCT00000004725	FAM135A	1:50579714-50716183	6563
TCONS_00000696	j	ENSSSCT00000064116	FAM135A	1:50579714-50716186	6056
TCONS_00000697	j	ENSSSCT00000064116	FAM135A	1:50579714-50716186	7149
TCONS_00000698	=	ENSSSCT00000062959	FAM135A	1:50579725-50715879	4898
TCONS_00000699	=	ENSSSCT00000048904	FAM135A	1:50579729-50716186	6629
TCONS_00000700	=	ENSSSCT00000064116	FAM135A	1:50579820-50715891	5775
TCONS_00000701	=	ENSSSCT00000054799	FAM135A	1:50596449-50714672	3831
TCONS_00000702	=	ENSSSCT00000045995	FAM135A	1:50596488-50714672	3960
TCONS_00000703	j	ENSSSCT00000064116	FAM135A	1:50642934-50716186	7857
TCONS_00000704	j	ENSSSCT00000064116	FAM135A	1:50644024-50695406	4757
TCONS_00000705	=	ENSSSCT00000060012	FAM135A	1:50644678-50714672	3891
TCONS_00000706	j	ENSSSCT00000064116	FAM135A	1:50648161-50716186	7003
TCONS_00000707	j	ENSSSCT00000064116	FAM135A	1:50659925-50716186	5575
TCONS_00000709	j	ENSSSCT00000052276	SMAP1	1:50721668-50744873	1151
TCONS_00000710	j	ENSSSCT00000052276	SMAP1	1:50721696-50731910	674
TCONS_00000711	=	ENSSSCT00000057791	SMAP1	1:50721700-50737706	1838
TCONS_00000712	j	ENSSSCT00000004726	SMAP1	1:50721700-50945633	5834
TCONS_00000713	=	ENSSSCT00000052276	SMAP1	1:50721700-50945633	5714
TCONS_00000714	=	ENSSSCT00000004726	SMAP1	1:50781626-50942189	2514
TCONS_00000715	=	ENSSSCT00000051535	SMAP1	1:50781668-50945633	5796
TCONS_00000716	=	ENSSSCT00000052865	SMAP1	1:50781668-50945633	5634
TCONS_00000717	=	ENSSSCT00000056202	SMAP1	1:50781668-50945633	5715
TCONS_00000718	=	ENSSSCT00000050145	SMAP1	1:50781732-50942188	2072
TCONS_00000719	j	ENSSSCT00000060364	OGFRL1	1:51313013-51332328	7907
TCONS_00000720	=	ENSSSCT00000060364	OGFRL1	1:51313013-51332328	7904
TCONS_00000721	j	ENSSSCT00000060364	OGFRL1	1:51315181-51332328	8609
TCONS_00000723	=	ENSSSCT00000004729	OGFRL1	1:51315426-51325936	1975
TCONS_00000724	-	-	-	1:51338616-51339725	1109
TCONS_00000725	-	-	-	1:51341571-51342269	698
TCONS_00000726	-	-	-	1:51342428-51343293	865
TCONS_00000727	-	-	-	1:51343414-51347077	3663
TCONS_00000728	-	-	-	1:51347211-51350287	3076
TCONS_00000729	-	-	-	1:51350459-51352028	1569
TCONS_00000730	-	-	-	1:51352261-51369068	16807
TCONS_00000731	x	ENSSSCT00000044507	ENSSSCG00000035593	1:51381881-51428264	46383
TCONS_00000732	j	ENSSSCT00000004730	RIMS1	1:51785278-51867044	978
TCONS_00000733	j	ENSSSCT00000004730	RIMS1	1:51785353-51990870	1285
TCONS_00000734	j	ENSSSCT00000004730	RIMS1	1:51785353-52246469	6249
TCONS_00000735	j	ENSSSCT00000004730	RIMS1	1:51785353-52246469	6372
TCONS_00000736	j	ENSSSCT00000004730	RIMS1	1:51785353-52246469	7122
TCONS_00000737	j	ENSSSCT00000004730	RIMS1	1:51785353-52246469	6267
TCONS_00000738	=	ENSSSCT00000004730	RIMS1	1:51785519-52244382	4884
TCONS_00000739	=	ENSSSCT00000039201	RIMS1	1:51785519-52246363	6781
TCONS_00000740	=	ENSSSCT00000062332	RIMS1	1:51785519-52246363	6598
TCONS_00000741	j	ENSSSCT00000004730	RIMS1	1:51785519-52246469	6567
TCONS_00000742	j	ENSSSCT00000004730	RIMS1	1:51866270-52246469	6567
TCONS_00000743	=	ENSSSCT00000055965	RF00026	1:51941781-51941888	107
TCONS_00000744	j	ENSSSCT00000004730	RIMS1	1:52035451-52106925	4180
TCONS_00000745	=	ENSSSCT00000065167	RIMS1	1:52041642-52245286	3541
TCONS_00000746	=	ENSSSCT00000055714	RIMS1	1:52041654-52244926	3292
TCONS_00000747	=	ENSSSCT00000054435	RIMS1	1:52041935-52244926	3335
TCONS_00000748	=	ENSSSCT00000058746	RIMS1	1:52083458-52244926	2565
TCONS_00000749	j	ENSSSCT00000004730	RIMS1	1:52098116-52246469	4217
TCONS_00000750	j	ENSSSCT00000004730	RIMS1	1:52099947-52246469	8070
TCONS_00000751	j	ENSSSCT00000004730	RIMS1	1:52099964-52246469	4896
TCONS_00000752	j	ENSSSCT00000004730	RIMS1	1:52116914-52246469	7955
TCONS_00000753	=	ENSSSCT00000063919	RIMS1	1:52130049-52244382	1684
TCONS_00000754	=	ENSSSCT00000062922	RIMS1	1:52139089-52244382	1686
TCONS_00000755	=	ENSSSCT00000044722	ENSSSCG00000032539	1:52246400-52246665	234
TCONS_00000756	=	ENSSSCT00000040649	ENSSSCG00000033341	1:52435433-52435826	393
TCONS_00000757	=	ENSSSCT00000038363	KCNQ5	1:52732774-52936281	2812
TCONS_00000758	=	ENSSSCT00000062194	KCNQ5	1:52732774-52936281	2785
TCONS_00000759	=	ENSSSCT00000026479	KCNQ5	1:52764474-52939688	5781
TCONS_00000760	=	ENSSSCT00000004731	KCNQ5	1:52800625-52939672	5710
TCONS_00000761	=	ENSSSCT00000004736	ENSSSCG00000004284	1:52996946-53007687	336
TCONS_00000762	=	ENSSSCT00000004739	DDX43	1:53021221-53038982	1821
TCONS_00000763	=	ENSSSCT00000004740	DDX43	1:53021221-53038982	1932
TCONS_00000764	j	ENSSSCT00000037924	CYB5R4	1:53091418-53178951	2311
TCONS_00000765	=	ENSSSCT00000023321	CYB5R4	1:53091418-53190676	2145
TCONS_00000766	=	ENSSSCT00000030777	CYB5R4	1:53091418-53190676	2299
TCONS_00000767	=	ENSSSCT00000037924	CYB5R4	1:53091418-53190676	2412
TCONS_00000769	j	ENSSSCT00000037924	CYB5R4	1:53097509-53178951	1709
TCONS_00000770	j	ENSSSCT00000037924	CYB5R4	1:53097509-53191568	2702
TCONS_00000771	j	ENSSSCT00000053410	MRAP2	1:53256256-53318106	2036
TCONS_00000772	=	ENSSSCT00000025979	MRAP2	1:53256256-53318106	1924
TCONS_00000773	=	ENSSSCT00000053410	MRAP2	1:53258441-53318104	5024
TCONS_00000774	j	ENSSSCT00000053410	MRAP2	1:53258441-53318106	4696
TCONS_00000775	=	ENSSSCT00000058595	ENSSSCG00000031194	1:53865457-53866954	345
TCONS_00000776	=	ENSSSCT00000034230	NT5E	1:54400788-54450181	3572
TCONS_00000777	j	ENSSSCT00000034230	NT5E	1:54444986-54450690	3037
TCONS_00000778	=	ENSSSCT00000021516	RF00099	1:55174071-55174197	126
TCONS_00000779	=	ENSSSCT00000050259	HTR1E	1:55408111-55497590	5210
TCONS_00000781	=	ENSSSCT00000065061	ZNF292	1:55618001-55710827	8647
TCONS_00000782	=	ENSSSCT00000045846	ZNF292	1:55618558-55712943	10405
TCONS_00000783	j	ENSSSCT00000065061	ZNF292	1:55619016-55714103	11452
TCONS_00000785	=	ENSSSCT00000041286	ZNF292	1:55690543-55710828	8250
TCONS_00000786	=	ENSSSCT00000004754	SMIM8	1:55753932-55763969	1915
TCONS_00000788	j	ENSSSCT00000004755	C6orf163	1:55753932-55771478	4852
TCONS_00000789	j	ENSSSCT00000004755	C6orf163	1:55753932-55788853	5281
TCONS_00000790	=	ENSSSCT00000004755	C6orf163	1:55765773-55788281	990
TCONS_00000791	j	ENSSSCT00000004755	C6orf163	1:55767756-55788853	3985
TCONS_00000792	=	ENSSSCT00000004756	ENSSSCG00000004302	1:55821541-55853742	2385
TCONS_00000793	=	ENSSSCT00000059405	ENSSSCG00000004302	1:55821545-55853743	2238
TCONS_00000794	j	ENSSSCT00000004756	ENSSSCG00000004302	1:55828139-55853743	2634
TCONS_00000795	j	ENSSSCT00000004759	SLC35A1	1:55859613-55879419	1210
TCONS_00000796	j	ENSSSCT00000004759	SLC35A1	1:55859613-55895782	2538
TCONS_00000797	=	ENSSSCT00000004759	SLC35A1	1:55859613-55895782	2078
TCONS_00000798	=	ENSSSCT00000051469	SLC35A1	1:55880918-55895693	2991
TCONS_00000799	j	ENSSSCT00000037698	ORC3	1:55954148-56000736	1608
TCONS_00000800	j	ENSSSCT00000037698	ORC3	1:55954148-56000736	1365
TCONS_00000801	j	ENSSSCT00000037698	ORC3	1:55954148-56041241	2557
TCONS_00000802	j	ENSSSCT00000037698	ORC3	1:55954148-56041241	2554
TCONS_00000803	j	ENSSSCT00000037698	ORC3	1:55954148-56042238	2642
TCONS_00000804	=	ENSSSCT00000037698	ORC3	1:55954148-56044246	4162
TCONS_00000805	j	ENSSSCT00000037698	ORC3	1:55954148-56047150	6823
TCONS_00000806	=	ENSSSCT00000044632	ORC3	1:55982220-56042584	1896
TCONS_00000807	=	ENSSSCT00000004761	ORC3	1:55984586-56042584	2242
TCONS_00000809	j	ENSSSCT00000037698	ORC3	1:55984586-56047150	6811
TCONS_00000810	=	ENSSSCT00000045603	ENSSSCG00000038663	1:56092543-56271772	2246
TCONS_00000811	=	ENSSSCT00000043574	ENSSSCG00000038663	1:56184770-56274861	5005
TCONS_00000812	=	ENSSSCT00000004763	SPACA1	1:56378299-56395493	964
TCONS_00000813	=	ENSSSCT00000030834	ENSSSCG00000029003	1:56689045-56689768	723
TCONS_00000814	=	ENSSSCT00000056541	ENSSSCG00000038261	1:57011548-57011982	363
TCONS_00000816	=	ENSSSCT00000058910	PNRC1	1:57128363-57134034	3577
TCONS_00000817	=	ENSSSCT00000041320	PNRC1	1:57128427-57134034	3595
TCONS_00000818	=	ENSSSCT00000027965	PNRC1	1:57129267-57132058	1635
TCONS_00000819	=	ENSSSCT00000054078	ENSSSCG00000035549	1:57131438-57131640	123
TCONS_00000820	j	ENSSSCT00000004769	PM20D2	1:57185913-57219293	7845
TCONS_00000821	j	ENSSSCT00000004769	PM20D2	1:57185913-57219293	6550
TCONS_00000822	=	ENSSSCT00000004769	PM20D2	1:57188534-57216285	3539
TCONS_00000823	j	ENSSSCT00000004769	PM20D2	1:57190155-57219293	7225
TCONS_00000824	j	ENSSSCT00000004769	PM20D2	1:57191567-57219293	7375
TCONS_00000825	j	ENSSSCT00000004769	PM20D2	1:57191606-57219293	6041
TCONS_00000826	x	ENSSSCT00000004771	GABRR2	1:57222937-57228566	1658
TCONS_00000827	=	ENSSSCT00000059750	RF00026	1:57407748-57407855	107
TCONS_00000828	=	ENSSSCT00000004778	ANKRD6	1:57437810-57644231	2550
TCONS_00000831	=	ENSSSCT00000043370	ANKRD6	1:57437999-57645955	4220
TCONS_00000832	=	ENSSSCT00000055894	ANKRD6	1:57438003-57645432	3588
TCONS_00000833	=	ENSSSCT00000048502	ANKRD6	1:57438021-57645434	3380
TCONS_00000834	=	ENSSSCT00000063190	ANKRD6	1:57438024-57645434	3470
TCONS_00000835	=	ENSSSCT00000039423	ANKRD6	1:57575857-57645383	3596
TCONS_00000836	j	ENSSSCT00000043370	ANKRD6	1:57605166-57647175	5506
TCONS_00000837	=	ENSSSCT00000056510	ANKRD6	1:57609874-57644231	2268
TCONS_00000839	=	ENSSSCT00000031111	ANKRD6	1:57615545-57644231	1944
TCONS_00000840	=	ENSSSCT00000042924	ANKRD6	1:57618449-57644231	1722
TCONS_00000841	=	ENSSSCT00000040324	RF00024	1:57646794-57647152	358
TCONS_00000842	=	ENSSSCT00000004783	CASP8AP2	1:57834115-57859479	5882
TCONS_00000843	j	ENSSSCT00000048442	CASP8AP2	1:57834115-57862792	6590
TCONS_00000844	=	ENSSSCT00000048442	CASP8AP2	1:57834115-57864194	6554
TCONS_00000845	=	ENSSSCT00000050370	CASP8AP2	1:57834115-57864194	6109
TCONS_00000846	j	ENSSSCT00000048442	CASP8AP2	1:57834115-57864833	7718
TCONS_00000848	j	ENSSSCT00000048442	CASP8AP2	1:57834115-57864833	6914
TCONS_00000850	j	ENSSSCT00000048442	CASP8AP2	1:57834115-57864833	6817
TCONS_00000851	j	ENSSSCT00000048442	CASP8AP2	1:57834115-57864833	6751
TCONS_00000852	=	ENSSSCT00000004787	CASP8AP2	1:57834284-57864833	6846
TCONS_00000853	j	ENSSSCT00000048442	CASP8AP2	1:57837874-57864833	6639
TCONS_00000854	=	ENSSSCT00000004786	GJA10	1:57879739-57881395	1656
TCONS_00000855	=	ENSSSCT00000055393	ENSSSCG00000040939	1:58775197-58779825	4628
TCONS_00000856	-	-	-	1:59993101-60005301	12200
TCONS_00000857	-	-	-	1:60000405-60027965	1252
TCONS_00000858	-	-	-	1:60073222-60074625	1105
TCONS_00000859	=	ENSSSCT00000053401	ENSSSCG00000034849	1:60259864-60260832	228
TCONS_00000860	=	ENSSSCT00000038684	MANEA	1:62887683-62945655	6457
TCONS_00000861	j	ENSSSCT00000038684	MANEA	1:62933163-62945655	5516
TCONS_00000862	j	ENSSSCT00000004795	UFL1	1:63638524-63700975	4560
TCONS_00000863	=	ENSSSCT00000048009	UFL1	1:63638524-63700975	4771
TCONS_00000864	=	ENSSSCT00000004795	UFL1	1:63638524-63700975	4852
TCONS_00000865	=	ENSSSCT00000048009	UFL1	1:63638530-63698630	2420
TCONS_00000866	=	ENSSSCT00000028080	UFL1	1:63639960-63698933	2342
TCONS_00000867	j	ENSSSCT00000004795	UFL1	1:63659481-63700975	6108
TCONS_00000868	j	ENSSSCT00000004795	UFL1	1:63692834-63700975	6712
TCONS_00000869	=	ENSSSCT00000004796	FHL5	1:63705935-63755534	4580
TCONS_00000870	j	ENSSSCT00000004796	FHL5	1:63708637-63755534	4552
TCONS_00000871	=	ENSSSCT00000057867	ENSSSCG00000037906	1:64021524-64050524	228
TCONS_00000872	=	ENSSSCT00000043694	ENSSSCG00000037906	1:64028048-64062137	186
TCONS_00000873	o	ENSSSCT00000057867	ENSSSCG00000037906	1:64034797-64037163	2366
TCONS_00000874	=	ENSSSCT00000024655	KLHL32	1:64078667-64302979	1845
TCONS_00000875	=	ENSSSCT00000004799	KLHL32	1:64078667-64303124	2163
TCONS_00000876	=	ENSSSCT00000042078	KLHL32	1:64078667-64303124	2238
TCONS_00000877	=	ENSSSCT00000050922	KLHL32	1:64078667-64303124	2229
TCONS_00000878	=	ENSSSCT00000056993	KLHL32	1:64078667-64303124	2425
TCONS_00000879	j	ENSSSCT00000056993	KLHL32	1:64078667-64307190	6300
TCONS_00000881	j	ENSSSCT00000056993	KLHL32	1:64078667-64307190	6445
TCONS_00000884	=	ENSSSCT00000064737	KLHL32	1:64078685-64307190	6385
TCONS_00000885	=	ENSSSCT00000045175	KLHL32	1:64078873-64307174	5965
TCONS_00000886	=	ENSSSCT00000064080	KLHL32	1:64078907-64307183	5212
TCONS_00000887	=	ENSSSCT00000031034	KLHL32	1:64127616-64304337	2830
TCONS_00000888	=	ENSSSCT00000054506	RF00100	1:64437310-64437630	320
TCONS_00000889	=	ENSSSCT00000050647	RF00026	1:64943609-64943716	107
TCONS_00000890	=	ENSSSCT00000021407	MIR2113	1:65162858-65162949	91
TCONS_00000891	=	ENSSSCT00000004803	POU3F2	1:65835518-65848875	3158
TCONS_00000892	j	ENSSSCT00000053219	ENSSSCG00000038757	1:66459906-66468602	4999
TCONS_00000893	=	ENSSSCT00000053219	ENSSSCG00000038757	1:66459979-66467850	2653
TCONS_00000895	=	ENSSSCT00000043564	ENSSSCG00000033772	1:66521548-66521980	354
TCONS_00000896	=	ENSSSCT00000004811	PRDM13	1:66539060-66546406	2130
TCONS_00000897	=	ENSSSCT00000041582	ENSSSCG00000032685	1:66896958-66971110	792
TCONS_00000898	=	ENSSSCT00000021581	RF00001	1:67377090-67377208	118
TCONS_00000899	=	ENSSSCT00000004819	GRIK2	1:68289342-68679256	2981
TCONS_00000900	=	ENSSSCT00000032833	GRIK2	1:68289376-68679252	3030
TCONS_00000901	=	ENSSSCT00000041957	ENSSSCG00000032719	1:68916790-68919702	2618
TCONS_00000902	=	ENSSSCT00000043008	LIN28B	1:71174508-71299820	5396
TCONS_00000903	=	ENSSSCT00000043223	ENSSSCG00000038975	1:71831527-71837025	431
TCONS_00000904	-	-	-	1:71837291-71840925	273
TCONS_00000905	j	ENSSSCT00000037769	PRDM1	1:72227028-72337411	6933
TCONS_00000906	j	ENSSSCT00000037769	PRDM1	1:72311979-72314450	886
TCONS_00000907	j	ENSSSCT00000037769	PRDM1	1:72311979-72337411	7295
TCONS_00000908	=	ENSSSCT00000004830	PRDM1	1:72312081-72337411	6823
TCONS_00000909	=	ENSSSCT00000038421	PRDM1	1:72312081-72337411	6694
TCONS_00000910	j	ENSSSCT00000037769	PRDM1	1:72312698-72337411	7880
TCONS_00000911	=	ENSSSCT00000037769	PRDM1	1:72312937-72337411	7271
TCONS_00000912	j	ENSSSCT00000037769	PRDM1	1:72322674-72337411	8426
TCONS_00000913	j	ENSSSCT00000037769	PRDM1	1:72322674-72337411	8555
TCONS_00000914	=	ENSSSCT00000053050	PRDM1	1:72324605-72337411	6421
TCONS_00000915	=	ENSSSCT00000065303	ENSSSCG00000032933	1:72466676-72532575	315
TCONS_00000916	j	ENSSSCT00000033563	CRYBG1	1:72552767-72756909	6868
TCONS_00000917	=	ENSSSCT00000004832	CRYBG1	1:72552767-72762943	6608
TCONS_00000918	j	ENSSSCT00000033563	CRYBG1	1:72552767-72763556	9175
TCONS_00000919	=	ENSSSCT00000033563	CRYBG1	1:72552870-72763556	7151
TCONS_00000920	=	ENSSSCT00000036224	CRYBG1	1:72552879-72763545	6992
TCONS_00000921	=	ENSSSCT00000027684	CRYBG1	1:72683319-72763111	6147
TCONS_00000922	j	ENSSSCT00000033563	CRYBG1	1:72752454-72763556	2754
TCONS_00000923	j	ENSSSCT00000004835	QRSL1	1:72813892-72845469	4054
TCONS_00000924	j	ENSSSCT00000004835	QRSL1	1:72813892-72845469	4010
TCONS_00000925	j	ENSSSCT00000004835	QRSL1	1:72813892-72846866	4305
TCONS_00000926	j	ENSSSCT00000004835	QRSL1	1:72813892-72846866	4361
TCONS_00000927	=	ENSSSCT00000041310	QRSL1	1:72814781-72846754	3480
TCONS_00000928	=	ENSSSCT00000004835	QRSL1	1:72815615-72846866	2918
TCONS_00000929	=	ENSSSCT00000049984	ENSSSCG00000037071	1:72990739-73131269	426
TCONS_00000930	=	ENSSSCT00000039523	ENSSSCG00000037071	1:73130879-73131199	267
TCONS_00000931	j	ENSSSCT00000042798	C6orf203	1:73162373-73174644	1403
TCONS_00000932	j	ENSSSCT00000042798	C6orf203	1:73162373-73174644	1276
TCONS_00000933	=	ENSSSCT00000059292	C6orf203	1:73162373-73174644	1584
TCONS_00000934	=	ENSSSCT00000042798	C6orf203	1:73164543-73174164	1639
TCONS_00000935	j	ENSSSCT00000004840	SOBP	1:73549182-73595518	1559
TCONS_00000936	j	ENSSSCT00000004840	SOBP	1:73549182-73702017	3161
TCONS_00000937	=	ENSSSCT00000004840	SOBP	1:73549182-73702017	3257
TCONS_00000938	=	ENSSSCT00000056631	ENSSSCG00000040159	1:73720748-73721078	273
TCONS_00000939	-	-	-	1:73829878-73832301	740
TCONS_00000940	=	ENSSSCT00000022342	NR2E1	1:74271041-74292681	3160
TCONS_00000941	j	ENSSSCT00000022746	AFG1L	1:74367424-74429334	1088
TCONS_00000942	j	ENSSSCT00000022746	AFG1L	1:74367424-74546421	2629
TCONS_00000943	=	ENSSSCT00000056646	AFG1L	1:74367424-74591853	4731
TCONS_00000944	=	ENSSSCT00000046117	AFG1L	1:74367424-74591853	4845
TCONS_00000945	=	ENSSSCT00000022746	AFG1L	1:74367522-74589606	1959
TCONS_00000946	=	ENSSSCT00000056646	AFG1L	1:74367623-74590621	3300
TCONS_00000947	j	ENSSSCT00000022746	AFG1L	1:74569041-74591853	3630
TCONS_00000948	j	ENSSSCT00000022746	AFG1L	1:74578900-74591853	3838
TCONS_00000949	=	ENSSSCT00000038875	FOXO3	1:74626671-74760320	7182
TCONS_00000950	j	ENSSSCT00000004849	FOXO3	1:74626671-74768419	8827
TCONS_00000951	j	ENSSSCT00000004849	FOXO3	1:74628032-74768419	9158
TCONS_00000952	=	ENSSSCT00000004849	FOXO3	1:74628217-74760325	7333
TCONS_00000953	j	ENSSSCT00000004849	FOXO3	1:74628217-74766804	9314
TCONS_00000954	j	ENSSSCT00000004849	FOXO3	1:74628466-74768419	9688
TCONS_00000955	=	ENSSSCT00000058607	FOXO3	1:74629382-74759646	6453
TCONS_00000956	-	-	-	1:74767726-74768419	693
TCONS_00000957	-	-	-	1:74768507-74772488	2809
TCONS_00000958	-	-	-	1:74768515-74772488	3973
TCONS_00000959	j	ENSSSCT00000004851	ENSSSCG00000004388	1:74923830-74960494	996
TCONS_00000960	j	ENSSSCT00000004851	ENSSSCG00000004388	1:74923830-74981837	1250
TCONS_00000961	=	ENSSSCT00000004851	ENSSSCG00000004388	1:74923830-75041844	2306
TCONS_00000962	=	ENSSSCT00000058439	ENSSSCG00000038818	1:74930299-74960494	839
TCONS_00000963	=	ENSSSCT00000056166	ENSSSCG00000004388	1:74973894-75078468	2401
TCONS_00000964	=	ENSSSCT00000060669	ENSSSCG00000004388	1:74973894-75078468	1873
TCONS_00000966	=	ENSSSCT00000004852	ENSSSCG00000004389	1:75118460-75118781	321
TCONS_00000967	j	ENSSSCT00000004854	CEP57L1	1:75171011-75227479	2141
TCONS_00000968	j	ENSSSCT00000004854	CEP57L1	1:75171047-75225831	2643
TCONS_00000969	=	ENSSSCT00000004854	CEP57L1	1:75171047-75227032	1968
TCONS_00000970	j	ENSSSCT00000004854	CEP57L1	1:75171047-75227479	2315
TCONS_00000971	j	ENSSSCT00000024443	ENSSSCG00000004415	1:75171047-75341815	6551
TCONS_00000972	j	ENSSSCT00000024443	ENSSSCG00000004415	1:75228065-75431655	7626
TCONS_00000973	j	ENSSSCT00000024443	ENSSSCG00000004415	1:75228238-75431655	7192
TCONS_00000974	j	ENSSSCT00000024443	ENSSSCG00000004415	1:75228238-75431655	7387
TCONS_00000975	j	ENSSSCT00000024443	ENSSSCG00000004415	1:75229807-75431655	6982
TCONS_00000976	j	ENSSSCT00000024443	ENSSSCG00000004415	1:75272049-75324268	2473
TCONS_00000977	=	ENSSSCT00000024443	ENSSSCG00000004415	1:75272049-75431503	6634
TCONS_00000978	j	ENSSSCT00000024443	ENSSSCG00000004415	1:75272049-75431655	6807
TCONS_00000979	=	ENSSSCT00000004878	ENSSSCG00000004415	1:75273330-75431503	6512
TCONS_00000980	j	ENSSSCT00000024443	ENSSSCG00000004415	1:75284247-75368999	4317
TCONS_00000981	j	ENSSSCT00000024443	ENSSSCG00000004415	1:75353521-75431655	3735
TCONS_00000982	j	ENSSSCT00000024443	ENSSSCG00000004415	1:75373313-75431655	3209
TCONS_00000983	=	ENSSSCT00000060980	ENSSSCG00000035239	1:75437529-75462332	180
TCONS_00000984	=	ENSSSCT00000004871	SMPD2	1:75508297-75512153	2376
TCONS_00000985	=	ENSSSCT00000064573	ENSSSCG00000033916	1:75600048-75600538	171
TCONS_00000986	=	ENSSSCT00000031596	FIG4	1:75693530-75846863	3137
TCONS_00000987	=	ENSSSCT00000047387	FIG4	1:75693530-75846863	3590
TCONS_00000989	j	ENSSSCT00000004868	FIG4	1:75693605-75847515	3631
TCONS_00000990	=	ENSSSCT00000004868	FIG4	1:75694203-75847515	3697
TCONS_00000991	=	ENSSSCT00000004869	ENSSSCG00000004406	1:75980381-75981771	1390
TCONS_00000992	j	ENSSSCT00000004866	CDC40	1:76179163-76181302	846
TCONS_00000993	=	ENSSSCT00000004866	CDC40	1:76179163-76234685	3892
TCONS_00000994	=	ENSSSCT00000046475	CDC40	1:76180423-76232955	1960
TCONS_00000996	j	ENSSSCT00000004866	CDC40	1:76211672-76234758	3842
TCONS_00000998	=	ENSSSCT00000004859	ENSSSCG00000004396	1:76675740-76676106	366
TCONS_00000999	j	ENSSSCT00000063626	ENSSSCG00000035433	1:76702286-76714806	7463
TCONS_00001000	=	ENSSSCT00000063626	ENSSSCG00000035433	1:76707022-76713882	1386
TCONS_00001001	x	ENSSSCT00000057673	CDK19	1:76790319-76793130	2811
TCONS_00001002	j	ENSSSCT00000004855	AMD1	1:76839730-76858221	1081
TCONS_00001003	j	ENSSSCT00000004855	AMD1	1:76839730-76859189	1037
TCONS_00001004	=	ENSSSCT00000004855	AMD1	1:76839730-76863722	2828
TCONS_00001005	j	ENSSSCT00000004855	AMD1	1:76839730-76864091	4684
TCONS_00001006	j	ENSSSCT00000004855	AMD1	1:76839730-76864091	3738
TCONS_00001007	j	ENSSSCT00000004855	AMD1	1:76856052-76864091	3839
TCONS_00001008	j	ENSSSCT00000004855	AMD1	1:76859348-76864091	2972
TCONS_00001009	j	ENSSSCT00000004856	GTF3C6	1:76896712-76910001	2310
TCONS_00001010	=	ENSSSCT00000004856	GTF3C6	1:76896822-76909858	2060
TCONS_00001011	j	ENSSSCT00000004856	GTF3C6	1:76896822-76910001	2194
TCONS_00001012	=	ENSSSCT00000043824	RPF2	1:76917170-76960111	3011
TCONS_00001013	j	ENSSSCT00000043824	RPF2	1:76917170-76960398	3260
TCONS_00001014	=	ENSSSCT00000004857	RPF2	1:76917223-76959224	1993
TCONS_00001015	j	ENSSSCT00000004880	MFSD4B	1:76998384-77060048	632
TCONS_00001016	=	ENSSSCT00000022616	MFSD4B	1:76998384-77131431	2386
TCONS_00001018	j	ENSSSCT00000004880	MFSD4B	1:76998384-77139345	4327
TCONS_00001019	j	ENSSSCT00000004880	MFSD4B	1:76998384-77173243	8718
TCONS_00001020	=	ENSSSCT00000004880	MFSD4B	1:76998571-77138524	3433
TCONS_00001021	=	ENSSSCT00000028340	MFSD4B	1:76998571-77164387	1601
TCONS_00001022	j	ENSSSCT00000004880	MFSD4B	1:77102338-77133591	3562
TCONS_00001023	j	ENSSSCT00000004880	MFSD4B	1:77102338-77139345	3343
TCONS_00001024	=	ENSSSCT00000056064	MFSD4B	1:77159309-77171084	5567
TCONS_00001026	=	ENSSSCT00000004882	MFSD4B	1:77159654-77167440	1461
TCONS_00001027	x	ENSSSCT00000004881	REV3L	1:77400835-77475723	497
TCONS_00001028	-	-	-	1:77407177-77425367	6441
TCONS_00001029	-	-	-	1:77470476-77475723	1970
TCONS_00001030	=	ENSSSCT00000025701	RF00026	1:77983208-77983315	107
TCONS_00001031	=	ENSSSCT00000004887	WISP3	1:78005359-78021145	5091
TCONS_00001032	=	ENSSSCT00000057912	WISP3	1:78005359-78021145	5027
TCONS_00001033	=	ENSSSCT00000004887	WISP3	1:78005937-78019250	2618
TCONS_00001034	=	ENSSSCT00000044947	FAM229B	1:78048479-78066722	4021
TCONS_00001035	=	ENSSSCT00000065221	FAM229B	1:78048479-78066722	4181
TCONS_00001036	=	ENSSSCT00000038674	MARCKS	1:79789751-79796128	4583
TCONS_00001037	=	ENSSSCT00000042675	ENSSSCG00000040108	1:79971578-79973019	456
TCONS_00001038	=	ENSSSCT00000004900	NT5DC1	1:81745956-81879189	1432
TCONS_00001040	=	ENSSSCT00000035653	NT5DC1	1:81746021-81880688	2938
TCONS_00001041	j	ENSSSCT00000042745	DSE	1:81996968-82063845	4182
TCONS_00001042	=	ENSSSCT00000004906	DSE	1:81996968-82063845	4186
TCONS_00001043	=	ENSSSCT00000042745	DSE	1:81997505-82063845	4241
TCONS_00001044	=	ENSSSCT00000054831	CALHM6	1:82085471-82091407	4958
TCONS_00001045	j	ENSSSCT00000062615	CALHM5	1:82108822-82120122	6702
TCONS_00001046	=	ENSSSCT00000062615	CALHM5	1:82109064-82117052	3517
TCONS_00001047	=	ENSSSCT00000004910	ENSSSCG00000004445	1:82150166-82155098	2120
TCONS_00001048	=	ENSSSCT00000004911	ENSSSCG00000004446	1:82161697-82182177	2983
TCONS_00001049	j	ENSSSCT00000004911	ENSSSCG00000004446	1:82176412-82182177	2965
TCONS_00001050	=	ENSSSCT00000004914	ENSSSCG00000025656	1:82215854-82250317	744
TCONS_00001051	=	ENSSSCT00000053616	ENSSSCG00000025656	1:82215854-82251016	825
TCONS_00001052	=	ENSSSCT00000038679	ENSSSCG00000023415	1:82251238-82279541	1557
TCONS_00001053	=	ENSSSCT00000004912	ENSSSCG00000023415	1:82257226-82279540	1269
TCONS_00001054	=	ENSSSCT00000058816	ENSSSCG00000023415	1:82257313-82279682	1514
TCONS_00001055	=	ENSSSCT00000047909	ENSSSCG00000040797	1:82324676-82342396	759
TCONS_00001056	=	ENSSSCT00000054373	ENSSSCG00000040797	1:82324676-82342396	798
TCONS_00001057	=	ENSSSCT00000059254	ENSSSCG00000039505	1:82354583-82355055	384
TCONS_00001058	=	ENSSSCT00000004915	LGSN	1:82371338-82387717	1713
TCONS_00001059	=	ENSSSCT00000047603	LGSN	1:82373630-82387717	1488
TCONS_00001060	=	ENSSSCT00000038829	SNAP91	1:82540818-82695368	3605
TCONS_00001061	=	ENSSSCT00000051434	SNAP91	1:82540818-82695368	3527
TCONS_00001062	=	ENSSSCT00000056175	SNAP91	1:82540818-82695368	3497
TCONS_00001063	=	ENSSSCT00000060105	SNAP91	1:82540818-82695368	3590
TCONS_00001064	=	ENSSSCT00000058076	SNAP91	1:82540984-82697226	2764
TCONS_00001065	=	ENSSSCT00000046996	SNAP91	1:82541127-82697224	2448
TCONS_00001066	=	ENSSSCT00000060709	SNAP91	1:82541434-82697227	3013
TCONS_00001067	=	ENSSSCT00000055987	SNAP91	1:82541585-82697220	2765
TCONS_00001068	=	ENSSSCT00000047119	SNAP91	1:82541830-82697224	2912
TCONS_00001069	=	ENSSSCT00000004918	SNAP91	1:82542111-82697224	2877
TCONS_00001070	=	ENSSSCT00000047131	ME1	1:82794963-82988446	2114
TCONS_00001072	=	ENSSSCT00000004920	ME1	1:82799872-82989908	3510
TCONS_00001073	j	ENSSSCT00000004922	PGM3	1:83003673-83029096	1744
TCONS_00001074	=	ENSSSCT00000004922	PGM3	1:83003690-83029096	1751
TCONS_00001075	=	ENSSSCT00000032416	UBE3D	1:83140094-83184480	1826
TCONS_00001076	=	ENSSSCT00000025129	UBE3D	1:83140094-83295353	1898
TCONS_00001077	=	ENSSSCT00000059955	UBE3D	1:83140094-83366841	1919
TCONS_00001078	=	ENSSSCT00000064929	ENSSSCG00000034941	1:83239898-83241232	1050
TCONS_00001079	=	ENSSSCT00000064448	ENSSSCG00000032485	1:83910830-83911513	537
TCONS_00001080	j	ENSSSCT00000004926	IBTK	1:83973529-83996016	3987
TCONS_00001081	=	ENSSSCT00000004926	IBTK	1:83973535-84070798	5980
TCONS_00001082	j	ENSSSCT00000004926	IBTK	1:83983479-83996016	4213
TCONS_00001083	=	ENSSSCT00000044652	IBTK	1:83983649-84070798	6042
TCONS_00001084	j	ENSSSCT00000004926	IBTK	1:83996099-84071184	5589
TCONS_00001085	j	ENSSSCT00000004926	IBTK	1:83996338-84071184	5347
TCONS_00001086	j	ENSSSCT00000004926	IBTK	1:84010756-84071184	4074
TCONS_00001087	=	ENSSSCT00000063220	ENSSSCG00000031482	1:84378452-84379044	429
TCONS_00001088	=	ENSSSCT00000052494	ENSSSCG00000031482	1:84378478-84379044	399
TCONS_00001089	=	ENSSSCT00000004931	TENT5A	1:84545027-84552134	5706
TCONS_00001090	j	ENSSSCT00000004931	TENT5A	1:84545027-84552285	5912
TCONS_00001091	=	ENSSSCT00000059985	ENSSSCG00000039755	1:85096971-85097045	74
TCONS_00001092	=	ENSSSCT00000004934	ELOVL4	1:86163083-86194319	1216
TCONS_00001094	=	ENSSSCT00000028339	ELOVL4	1:86163854-86196000	2976
TCONS_00001095	=	ENSSSCT00000037914	ELOVL4	1:86167053-86194319	1639
TCONS_00001097	=	ENSSSCT00000004936	LCA5	1:86516394-86683137	1971
TCONS_00001099	=	ENSSSCT00000060067	LCA5	1:86597282-86685073	4585
TCONS_00001100	=	ENSSSCT00000065390	LCA5	1:86608035-86685073	4340
TCONS_00001101	=	ENSSSCT00000045120	HMGN3	1:86954327-86987461	928
TCONS_00001102	j	ENSSSCT00000045120	HMGN3	1:86954327-86987462	872
TCONS_00001103	j	ENSSSCT00000045120	HMGN3	1:86954327-86987462	829
TCONS_00001104	j	ENSSSCT00000045120	HMGN3	1:86954327-86987462	788
TCONS_00001105	=	ENSSSCT00000055660	HMGN3	1:86954464-86987460	1031
TCONS_00001106	=	ENSSSCT00000004938	HMGN3	1:86954474-86987458	919
TCONS_00001107	=	ENSSSCT00000062552	HMGN3	1:86954528-86987460	937
TCONS_00001108	j	ENSSSCT00000004941	PHIP	1:87116945-87221472	4164
TCONS_00001109	j	ENSSSCT00000004941	PHIP	1:87116945-87247664	14784
TCONS_00001110	j	ENSSSCT00000004941	PHIP	1:87116945-87247664	14847
TCONS_00001111	j	ENSSSCT00000004941	PHIP	1:87116945-87247664	10797
TCONS_00001112	j	ENSSSCT00000004941	PHIP	1:87116949-87135326	1468
TCONS_00001113	=	ENSSSCT00000004941	PHIP	1:87117223-87242674	5466
TCONS_00001114	=	ENSSSCT00000004943	ENSSSCG00000004475	1:88596214-88601044	2725
TCONS_00001115	=	ENSSSCT00000037885	ENSSSCG00000038755	1:88884001-88885286	987
TCONS_00001116	=	ENSSSCT00000041181	IMPG1	1:89836324-89986396	2196
TCONS_00001117	=	ENSSSCT00000004946	IMPG1	1:89856896-89969185	2127
TCONS_00001118	=	ENSSSCT00000053613	IMPG1	1:89857649-89968411	2070
TCONS_00001119	=	ENSSSCT00000004944	IMPG1	1:89858035-89986396	2364
TCONS_00001120	j	ENSSSCT00000052001	FILIP1	1:90388399-90619753	4442
TCONS_00001121	=	ENSSSCT00000004949	FILIP1	1:90388399-90634839	3784
TCONS_00001122	j	ENSSSCT00000052001	FILIP1	1:90427172-90619753	5058
TCONS_00001124	=	ENSSSCT00000052001	FILIP1	1:90427958-90638550	7325
TCONS_00001125	=	ENSSSCT00000046596	FILIP1	1:90521050-90638550	7412
TCONS_00001126	=	ENSSSCT00000058400	TMEM30A	1:90643885-90688161	4307
TCONS_00001127	=	ENSSSCT00000044778	TMEM30A	1:90651022-90688161	4466
TCONS_00001128	=	ENSSSCT00000050629	TMEM30A	1:90651022-90688161	4358
TCONS_00001129	=	ENSSSCT00000004950	COX7A2	1:90696750-90703485	545
TCONS_00001130	j	ENSSSCT00000004955	COL12A1	1:90744288-90833092	4017
TCONS_00001131	=	ENSSSCT00000004955	COL12A1	1:90744288-90872963	9829
TCONS_00001132	j	ENSSSCT00000004955	COL12A1	1:90744288-90875099	8470
TCONS_00001134	=	ENSSSCT00000054403	RF00026	1:90800926-90801030	104
TCONS_00001135	=	ENSSSCT00000041079	ENSSSCG00000034949	1:90874113-90874305	192
TCONS_00001136	j	ENSSSCT00000004957	SLC17A5	1:92286826-92339078	2620
TCONS_00001137	j	ENSSSCT00000004957	SLC17A5	1:92286826-92339078	2767
TCONS_00001138	=	ENSSSCT00000004957	SLC17A5	1:92286826-92342780	2799
TCONS_00001139	=	ENSSSCT00000059736	SLC17A5	1:92286840-92342776	2694
TCONS_00001140	=	ENSSSCT00000045297	SLC17A5	1:92286840-92342785	2556
TCONS_00001141	=	ENSSSCT00000037477	SLC17A5	1:92286841-92342776	2621
TCONS_00001142	=	ENSSSCT00000058780	SLC17A5	1:92286907-92339078	2773
TCONS_00001143	=	ENSSSCT00000038019	SLC17A5	1:92295040-92341600	1479
TCONS_00001144	j	ENSSSCT00000004957	SLC17A5	1:92295040-92342785	2505
TCONS_00001145	j	ENSSSCT00000004957	SLC17A5	1:92295040-92342785	2418
TCONS_00001146	=	ENSSSCT00000037617	EEF1A1	1:92421229-92425050	1979
TCONS_00001147	j	ENSSSCT00000060502	EEF1A1	1:92421229-92426244	2891
TCONS_00001148	j	ENSSSCT00000060502	EEF1A1	1:92421805-92426244	2799
TCONS_00001149	=	ENSSSCT00000060502	EEF1A1	1:92421805-92472785	1509
TCONS_00001150	=	ENSSSCT00000004960	EEF1A1	1:92421950-92425033	1686
TCONS_00001151	=	ENSSSCT00000051184	EEF1A1	1:92421950-92425033	1662
TCONS_00001152	=	ENSSSCT00000063597	EEF1A1	1:92421950-92425033	1638
TCONS_00001153	=	ENSSSCT00000054928	EEF1A1	1:92421956-92425044	1925
TCONS_00001154	=	ENSSSCT00000051265	EEF1A1	1:92422666-92426244	3003
TCONS_00001155	=	ENSSSCT00000058438	EEF1A1	1:92422666-92426244	2903
TCONS_00001156	=	ENSSSCT00000030573	CGAS	1:92483277-92500551	1916
TCONS_00001157	x	ENSSSCT00000063541	ENSSSCG00000033160	1:92905437-92971475	181
TCONS_00001158	=	ENSSSCT00000057133	ENSSSCG00000035076	1:93085949-93099420	933
TCONS_00001159	=	ENSSSCT00000063350	ENSSSCG00000031966	1:93111776-93112559	783
TCONS_00001160	=	ENSSSCT00000006366	ENSSSCG00000005790	1:93149389-93150316	927
TCONS_00001161	=	ENSSSCT00000043292	ENSSSCG00000008882	1:93868757-93869355	567
TCONS_00001162	j	ENSSSCT00000004961	SETBP1	1:94295333-94638035	6298
TCONS_00001163	j	ENSSSCT00000004961	SETBP1	1:94295333-94666480	10264
TCONS_00001164	j	ENSSSCT00000004961	SETBP1	1:94296516-94666480	9724
TCONS_00001165	j	ENSSSCT00000004961	SETBP1	1:94296530-94638035	4981
TCONS_00001166	j	ENSSSCT00000004961	SETBP1	1:94296556-94638035	5718
TCONS_00001167	j	ENSSSCT00000004961	SETBP1	1:94296937-94666480	9928
TCONS_00001168	=	ENSSSCT00000004961	SETBP1	1:94314555-94663029	6168
TCONS_00001169	=	ENSSSCT00000019959	RF00100	1:95008674-95008977	303
TCONS_00001170	=	ENSSSCT00000004962	SLC14A2	1:95260780-95319541	2760
TCONS_00001171	=	ENSSSCT00000060356	SLC14A1	1:95354237-95383869	6491
TCONS_00001172	=	ENSSSCT00000004963	SLC14A1	1:95355239-95381489	3485
TCONS_00001173	j	ENSSSCT00000038608	SLC14A1	1:95355239-95383869	5724
TCONS_00001174	j	ENSSSCT00000038608	SLC14A1	1:95355239-95383869	5697
TCONS_00001175	j	ENSSSCT00000038608	SLC14A1	1:95355692-95383869	5649
TCONS_00001176	=	ENSSSCT00000038608	SLC14A1	1:95355692-95383869	5778
TCONS_00001177	=	ENSSSCT00000064306	SLC14A1	1:95355991-95383869	5614
TCONS_00001178	=	ENSSSCT00000049635	SLC14A1	1:95358001-95383869	5847
TCONS_00001179	=	ENSSSCT00000004964	SIGLEC15	1:95484224-95492660	3595
TCONS_00001180	=	ENSSSCT00000054092	HAUS1	1:95756219-95774054	1806
TCONS_00001181	=	ENSSSCT00000066083	HAUS1	1:95756219-95774054	1758
TCONS_00001182	j	ENSSSCT00000004969	HAUS1	1:95756219-95780761	1101
TCONS_00001183	j	ENSSSCT00000004969	HAUS1	1:95756219-95780761	1007
TCONS_00001184	j	ENSSSCT00000004969	HAUS1	1:95756219-95780761	1978
TCONS_00001185	=	ENSSSCT00000004969	HAUS1	1:95756256-95774245	1083
TCONS_00001186	j	ENSSSCT00000044561	C18orf25	1:95808694-95848873	2342
TCONS_00001187	=	ENSSSCT00000060349	C18orf25	1:95808694-95895019	5294
TCONS_00001188	j	ENSSSCT00000044561	C18orf25	1:95808694-95898560	9084
TCONS_00001189	j	ENSSSCT00000044561	C18orf25	1:95808694-95898560	9018
TCONS_00001191	j	ENSSSCT00000044561	C18orf25	1:95809187-95848873	2459
TCONS_00001192	j	ENSSSCT00000044561	C18orf25	1:95809187-95867022	2009
TCONS_00001193	=	ENSSSCT00000045747	C18orf25	1:95809187-95895019	5411
TCONS_00001196	=	ENSSSCT00000044561	C18orf25	1:95809230-95895020	5618
TCONS_00001197	=	ENSSSCT00000004972	C18orf25	1:95809247-95895027	5542
TCONS_00001198	=	ENSSSCT00000004974	RNF165	1:95951400-96066928	1690
TCONS_00001199	=	ENSSSCT00000029670	KATNAL2	1:96566811-96675096	1745
TCONS_00001201	x	ENSSSCT00000042255	SMAD2	1:97511573-97514751	893
TCONS_00001202	x	ENSSSCT00000042255	SMAD2	1:97511777-97514751	1065
TCONS_00001203	=	ENSSSCT00000064712	CTIF	1:98133311-98455570	6305
TCONS_00001204	j	ENSSSCT00000050085	CTIF	1:98133311-98455708	6449
TCONS_00001205	=	ENSSSCT00000004978	CTIF	1:98133348-98455119	5661
TCONS_00001206	=	ENSSSCT00000050085	CTIF	1:98134383-98455708	6387
TCONS_00001207	=	ENSSSCT00000052813	CTIF	1:98211382-98455708	6293
TCONS_00001208	=	ENSSSCT00000048558	CTIF	1:98220134-98455601	6059
TCONS_00001209	=	ENSSSCT00000058805	RF00402	1:99059820-99059925	105
TCONS_00001210	=	ENSSSCT00000004981	LIPG	1:99081903-99108684	1684
TCONS_00001211	=	ENSSSCT00000029856	LIPG	1:99081903-99108684	1642
TCONS_00001212	j	ENSSSCT00000023900	LIPG	1:99081903-99110876	4053
TCONS_00001214	=	ENSSSCT00000023900	LIPG	1:99081939-99110875	4019
TCONS_00001215	=	ENSSSCT00000031390	LIPG	1:99082719-99110876	3679
TCONS_00001216	=	ENSSSCT00000021640	RF00492	1:99311560-99311706	146
TCONS_00001217	=	ENSSSCT00000022086	RF00283	1:99311787-99311870	83
TCONS_00001218	=	ENSSSCT00000031088	RF00026	1:99572622-99572725	103
TCONS_00001220	=	ENSSSCT00000054326	ENSSSCG00000038388	1:99798835-99799418	459
TCONS_00001222	=	ENSSSCT00000052254	ENSSSCG00000037915	1:99802893-99803399	447
TCONS_00001223	=	ENSSSCT00000045418	ENSSSCG00000004518	1:99976206-99995059	2822
TCONS_00001224	=	ENSSSCT00000004990	ENSSSCG00000004518	1:99976519-99993490	1097
TCONS_00001225	=	ENSSSCT00000062962	ENSSSCG00000004518	1:99977598-99995059	2377
TCONS_00001226	=	ENSSSCT00000051938	MAPK4	1:100107425-100291586	4862
TCONS_00001227	=	ENSSSCT00000004992	MAPK4	1:100107920-100291589	4794
TCONS_00001228	=	ENSSSCT00000032864	MAPK4	1:100186877-100291586	4640
TCONS_00001229	=	ENSSSCT00000033301	MAPK4	1:100193710-100291591	4703
TCONS_00001230	=	ENSSSCT00000004994	ME2	1:100419398-100476021	3249
TCONS_00001231	j	ENSSSCT00000004994	ME2	1:100419548-100476712	3714
TCONS_00001233	=	ENSSSCT00000062663	ME2	1:100419768-100475774	2512
TCONS_00001234	=	ENSSSCT00000054033	ME2	1:100419996-100475769	2793
TCONS_00001235	j	ENSSSCT00000004994	ME2	1:100455181-100476712	3702
TCONS_00001236	j	ENSSSCT00000004997	SMAD4	1:100514766-100533885	5427
TCONS_00001237	j	ENSSSCT00000004997	SMAD4	1:100514766-100533885	3667
TCONS_00001238	j	ENSSSCT00000004997	SMAD4	1:100514766-100533885	3487
TCONS_00001239	=	ENSSSCT00000026385	ELAC1	1:100514766-100535987	3112
TCONS_00001241	j	ENSSSCT00000004997	SMAD4	1:100514766-100626477	2831
TCONS_00001242	=	ENSSSCT00000004997	SMAD4	1:100514790-100628029	3346
TCONS_00001244	=	ENSSSCT00000020924	RF00004	1:100560348-100560530	182
TCONS_00001246	j	ENSSSCT00000004997	SMAD4	1:100574403-100626477	2614
TCONS_00001247	j	ENSSSCT00000004997	SMAD4	1:100574403-100634479	9771
TCONS_00001248	=	ENSSSCT00000045286	SMAD4	1:100574480-100632822	7924
TCONS_00001249	=	ENSSSCT00000058124	SMAD4	1:100574625-100628029	3381
TCONS_00001252	=	ENSSSCT00000059572	SMAD4	1:100589133-100632822	8613
TCONS_00001253	=	ENSSSCT00000041073	SMAD4	1:100589849-100625656	1744
TCONS_00001254	=	ENSSSCT00000039851	SMAD4	1:100589849-100628581	3539
TCONS_00001255	=	ENSSSCT00000049593	DCC	1:102080199-103082095	4272
TCONS_00001256	-	-	-	1:103475709-103478375	956
TCONS_00001257	j	ENSSSCT00000055241	POLI	1:103794070-103804057	1946
TCONS_00001258	=	ENSSSCT00000005003	POLI	1:103794070-103820365	2565
TCONS_00001259	j	ENSSSCT00000055241	POLI	1:103794070-103824644	3682
TCONS_00001260	j	ENSSSCT00000055241	POLI	1:103794070-103824644	3956
TCONS_00001261	j	ENSSSCT00000055241	POLI	1:103794070-103824644	3861
TCONS_00001262	j	ENSSSCT00000055241	POLI	1:103794070-103824644	3953
TCONS_00001263	j	ENSSSCT00000055241	POLI	1:103794070-103824644	3833
TCONS_00001264	=	ENSSSCT00000036768	POLI	1:103794190-103820852	3052
TCONS_00001265	=	ENSSSCT00000055241	POLI	1:103794630-103824644	4790
TCONS_00001266	j	ENSSSCT00000054889	C18orf54	1:103861548-103882710	7644
TCONS_00001267	j	ENSSSCT00000054889	C18orf54	1:103861548-103882710	6951
TCONS_00001268	j	ENSSSCT00000054889	C18orf54	1:103861548-103882710	6855
TCONS_00001269	=	ENSSSCT00000005005	C18orf54	1:103861548-103883206	1807
TCONS_00001271	=	ENSSSCT00000040280	C18orf54	1:103861593-103883720	2372
TCONS_00001272	=	ENSSSCT00000054889	C18orf54	1:103861604-103887284	6014
TCONS_00001273	=	ENSSSCT00000043978	C18orf54	1:103861612-103881701	5967
TCONS_00001274	j	ENSSSCT00000054889	C18orf54	1:103864268-103882710	7090
TCONS_00001275	j	ENSSSCT00000054889	C18orf54	1:103865826-103887284	6197
TCONS_00001276	=	ENSSSCT00000056484	ENSSSCG00000038606	1:103906315-103921908	3171
TCONS_00001277	=	ENSSSCT00000054229	ENSSSCG00000039443	1:104157072-104170987	3332
TCONS_00001278	=	ENSSSCT00000066029	RAB27B	1:104241570-104414061	1997
TCONS_00001279	=	ENSSSCT00000059691	RAB27B	1:104241570-104418715	6909
TCONS_00001280	=	ENSSSCT00000042143	RAB27B	1:104352547-104418719	7060
TCONS_00001281	=	ENSSSCT00000039097	RAB27B	1:104352720-104417091	5001
TCONS_00001282	=	ENSSSCT00000048303	ENSSSCG00000040748	1:104467879-104469885	195
TCONS_00001283	=	ENSSSCT00000039131	WDR7	1:106012893-106409048	5070
TCONS_00001284	j	ENSSSCT00000061734	WDR7	1:106036001-106411851	7429
TCONS_00001285	j	ENSSSCT00000061734	WDR7	1:106036001-106411851	7509
TCONS_00001286	j	ENSSSCT00000061734	WDR7	1:106036001-106411851	7500
TCONS_00001287	=	ENSSSCT00000061734	WDR7	1:106036023-106411687	7338
TCONS_00001288	=	ENSSSCT00000024820	WDR7	1:106036023-106411705	7252
TCONS_00001289	j	ENSSSCT00000061734	WDR7	1:106036237-106411851	7365
TCONS_00001290	=	ENSSSCT00000005012	WDR7	1:106068405-106409048	4143
TCONS_00001291	j	ENSSSCT00000061734	WDR7	1:106149542-106411851	5396
TCONS_00001292	=	ENSSSCT00000042417	ST8SIA3	1:106683631-106696638	5630
TCONS_00001293	=	ENSSSCT00000051023	ST8SIA3	1:106684525-106697980	6398
TCONS_00001294	=	ENSSSCT00000005015	ONECUT2	1:106751324-106799956	4104
TCONS_00001295	=	ENSSSCT00000047084	ENSSSCG00000033063	1:106885090-106886240	198
TCONS_00001296	-	-	-	1:106933274-106963936	1003
TCONS_00001297	j	ENSSSCT00000005018	MTFMT	1:106970623-107001118	1395
TCONS_00001298	j	ENSSSCT00000005018	MTFMT	1:106970623-107001118	1529
TCONS_00001299	=	ENSSSCT00000005018	MTFMT	1:106970634-107001118	1546
TCONS_00001300	j	ENSSSCT00000005018	MTFMT	1:106997716-107001118	1428
TCONS_00001301	j	ENSSSCT00000005019	SPG21	1:107011417-107036350	2071
TCONS_00001302	=	ENSSSCT00000005019	SPG21	1:107011804-107036350	1771
TCONS_00001303	=	ENSSSCT00000025583	SPG21	1:107013672-107036331	1614
TCONS_00001304	-	-	-	1:107093973-107102063	8090
TCONS_00001306	=	ENSSSCT00000056451	ENSSSCG00000037998	1:107108432-107110300	1759
TCONS_00001307	x	ENSSSCT00000048116	ANKDD1A	1:107112747-107124912	12165
TCONS_00001308	x	ENSSSCT00000048116	ANKDD1A	1:107125597-107129250	3653
TCONS_00001309	=	ENSSSCT00000005023	PIF1	1:107218151-107226582	2473
TCONS_00001310	=	ENSSSCT00000043868	PIF1	1:107218151-107226582	2545
TCONS_00001311	=	ENSSSCT00000005024	RBPMS2	1:107259351-107296524	2038
TCONS_00001312	j	ENSSSCT00000005026	OAZ2	1:107325190-107336316	1014
TCONS_00001313	=	ENSSSCT00000005026	OAZ2	1:107325190-107339332	1896
TCONS_00001314	j	ENSSSCT00000005026	OAZ2	1:107325190-107341528	2151
TCONS_00001315	=	ENSSSCT00000005026	OAZ2	1:107325399-107338216	571
TCONS_00001316	=	ENSSSCT00000040536	OAZ2	1:107334349-107338442	1959
TCONS_00001317	j	ENSSSCT00000005026	OAZ2	1:107336466-107339332	1821
TCONS_00001318	=	ENSSSCT00000005031	PCLAF	1:107659434-107669476	1685
TCONS_00001319	=	ENSSSCT00000005032	PCLAF	1:107659545-107669331	1351
TCONS_00001320	j	ENSSSCT00000046925	CSNK1G1	1:107690005-107803732	973
TCONS_00001321	=	ENSSSCT00000063162	CSNK1G1	1:107690005-107860175	1646
TCONS_00001322	=	ENSSSCT00000005035	CSNK1G1	1:107690005-107877946	1754
TCONS_00001324	j	ENSSSCT00000046925	CSNK1G1	1:107690005-107884051	7835
TCONS_00001326	j	ENSSSCT00000046925	CSNK1G1	1:107690005-107884051	4258
TCONS_00001327	j	ENSSSCT00000046925	CSNK1G1	1:107690005-107884051	4345
TCONS_00001328	=	ENSSSCT00000046925	CSNK1G1	1:107690067-107880868	4701
TCONS_00001329	=	ENSSSCT00000060507	CSNK1G1	1:107690096-107884050	4142
TCONS_00001330	j	ENSSSCT00000046925	CSNK1G1	1:107869001-107884051	6561
TCONS_00001331	=	ENSSSCT00000046956	PPIB	1:107886611-107897098	5010
TCONS_00001332	=	ENSSSCT00000055173	PPIB	1:107886611-107897098	4968
TCONS_00001333	j	ENSSSCT00000044906	ENSSSCG00000034124	1:107951645-107969298	825
TCONS_00001334	=	ENSSSCT00000044906	ENSSSCG00000034124	1:107951645-107969298	990
TCONS_00001335	j	ENSSSCT00000061524	DAPK2	1:107997284-108004998	752
TCONS_00001336	=	ENSSSCT00000061524	DAPK2	1:107997284-108132782	2883
TCONS_00001337	=	ENSSSCT00000041965	DAPK2	1:107997292-108132724	2733
TCONS_00001338	=	ENSSSCT00000059507	DAPK2	1:107997297-108123417	6510
TCONS_00001339	j	ENSSSCT00000061524	DAPK2	1:107998506-108132782	2815
TCONS_00001340	=	ENSSSCT00000028843	DAPK2	1:107998989-108131720	1740
TCONS_00001341	j	ENSSSCT00000061524	DAPK2	1:108111594-108132782	2633
TCONS_00001342	j	ENSSSCT00000061524	DAPK2	1:108114558-108132782	1958
TCONS_00001343	j	ENSSSCT00000044262	HERC1	1:108205793-108398533	15802
TCONS_00001344	=	ENSSSCT00000005038	HERC1	1:108205793-108403681	15152
TCONS_00001345	=	ENSSSCT00000026841	HERC1	1:108205793-108403681	14936
TCONS_00001346	=	ENSSSCT00000044262	HERC1	1:108205793-108403681	15218
TCONS_00001347	j	ENSSSCT00000044262	HERC1	1:108205793-108404179	15602
TCONS_00001348	j	ENSSSCT00000044262	HERC1	1:108205793-108404179	15626
TCONS_00001349	j	ENSSSCT00000044262	HERC1	1:108205793-108404179	15626
TCONS_00001350	j	ENSSSCT00000044262	HERC1	1:108205793-108404179	15623
TCONS_00001351	j	ENSSSCT00000044262	HERC1	1:108205793-108404179	15605
TCONS_00001352	j	ENSSSCT00000044262	HERC1	1:108205793-108404179	15629
TCONS_00001353	j	ENSSSCT00000044262	HERC1	1:108205793-108404179	15713
TCONS_00001354	j	ENSSSCT00000044262	HERC1	1:108284910-108404179	12590
TCONS_00001355	j	ENSSSCT00000044262	HERC1	1:108284910-108404179	12566
TCONS_00001356	j	ENSSSCT00000044262	HERC1	1:108284910-108404179	12569
TCONS_00001357	j	ENSSSCT00000062560	CA12	1:108648960-108696482	1895
TCONS_00001360	=	ENSSSCT00000062560	CA12	1:108649273-108708185	1773
TCONS_00001361	=	ENSSSCT00000005044	CA12	1:108649412-108707619	1035
TCONS_00001362	=	ENSSSCT00000027612	RPS27L	1:108881463-108890283	4564
TCONS_00001363	x	ENSSSCT00000050713	TPM1	1:108978338-108985878	7261
TCONS_00001364	=	ENSSSCT00000014034	ENSSSCG00000012839	1:109823181-109823386	186
TCONS_00001365	=	ENSSSCT00000005051	ENSSSCG00000004572	1:109825437-109827175	1537
TCONS_00001366	x	ENSSSCT00000040741	ENSSSCG00000004573	1:109922043-109923034	614
TCONS_00001367	x	ENSSSCT00000040741	ENSSSCG00000004573	1:109922178-109923034	613
TCONS_00001368	j	ENSSSCT00000062985	VPS13C	1:109931250-110011636	3871
TCONS_00001369	j	ENSSSCT00000062985	VPS13C	1:109931250-110018373	4908
TCONS_00001370	=	ENSSSCT00000061270	VPS13C	1:109931250-110090500	10971
TCONS_00001371	j	ENSSSCT00000062985	VPS13C	1:109931250-110092256	14261
TCONS_00001372	j	ENSSSCT00000062985	VPS13C	1:109931250-110092256	12672
TCONS_00001373	=	ENSSSCT00000053839	VPS13C	1:109931250-110092256	12793
TCONS_00001374	j	ENSSSCT00000062985	VPS13C	1:109931250-110104259	11966
TCONS_00001375	=	ENSSSCT00000062985	VPS13C	1:109931371-110104257	11772
TCONS_00001376	j	ENSSSCT00000062985	VPS13C	1:110009858-110011636	1056
TCONS_00001377	j	ENSSSCT00000062985	VPS13C	1:110032578-110104259	7098
TCONS_00001378	-	-	-	1:110719272-110915359	7021
TCONS_00001379	-	-	-	1:110745836-110804829	58993
TCONS_00001380	-	-	-	1:110751646-110759611	7228
TCONS_00001381	-	-	-	1:110889273-110915430	26157
TCONS_00001383	=	ENSSSCT00000056450	RF02271	1:111289315-111289479	164
TCONS_00001384	=	ENSSSCT00000005055	RORA	1:111375422-111475646	3622
TCONS_00001385	=	ENSSSCT00000057944	RORA	1:111375422-111477664	5832
TCONS_00001386	j	ENSSSCT00000057944	RORA	1:111375422-111482645	10586
TCONS_00001388	j	ENSSSCT00000047039	ICE2	1:111489167-111503016	1786
TCONS_00001389	j	ENSSSCT00000047039	ICE2	1:111489167-111520408	3187
TCONS_00001390	=	ENSSSCT00000047039	ICE2	1:111489167-111559413	3838
TCONS_00001391	j	ENSSSCT00000047039	ICE2	1:111489167-111568756	12762
TCONS_00001393	=	ENSSSCT00000005056	ICE2	1:111489763-111561911	5698
TCONS_00001394	=	ENSSSCT00000025364	ICE2	1:111489821-111561910	5380
TCONS_00001395	j	ENSSSCT00000047039	ICE2	1:111499142-111503016	2731
TCONS_00001396	j	ENSSSCT00000047039	ICE2	1:111499142-111520408	4132
TCONS_00001397	j	ENSSSCT00000047039	ICE2	1:111507127-111568756	11769
TCONS_00001398	j	ENSSSCT00000047039	ICE2	1:111520569-111568756	10472
TCONS_00001399	j	ENSSSCT00000047039	ICE2	1:111536397-111568756	22674
TCONS_00001400	j	ENSSSCT00000047039	ICE2	1:111554945-111568756	9947
TCONS_00001401	-	-	-	1:111583995-111586690	1344
TCONS_00001402	=	ENSSSCT00000046654	ANXA2	1:111588305-111634766	1245
TCONS_00001403	=	ENSSSCT00000005057	ANXA2	1:111588892-111635058	1380
TCONS_00001404	j	ENSSSCT00000034155	ANXA2	1:111589213-111596655	1192
TCONS_00001405	=	ENSSSCT00000047445	ANXA2	1:111589213-111635100	938
TCONS_00001406	=	ENSSSCT00000061725	ANXA2	1:111589222-111635059	2702
TCONS_00001407	=	ENSSSCT00000034155	ANXA2	1:111589222-111635100	1618
TCONS_00001408	j	ENSSSCT00000034155	ANXA2	1:111596713-111635100	5448
TCONS_00001409	=	ENSSSCT00000052176	ENSSSCG00000039280	1:111864304-111864712	387
TCONS_00001410	=	ENSSSCT00000040315	BNIP2	1:112344059-112369050	5344
TCONS_00001411	=	ENSSSCT00000065435	BNIP2	1:112344059-112369050	5332
TCONS_00001412	j	ENSSSCT00000005061	BNIP2	1:112344059-112370372	6789
TCONS_00001413	j	ENSSSCT00000005061	BNIP2	1:112344059-112370372	7418
TCONS_00001415	j	ENSSSCT00000005061	BNIP2	1:112344059-112370372	7517
TCONS_00001416	j	ENSSSCT00000005061	BNIP2	1:112344059-112370372	6812
TCONS_00001417	=	ENSSSCT00000005061	BNIP2	1:112344183-112369245	5502
TCONS_00001418	j	ENSSSCT00000005062	ENSSSCG00000004583	1:112371309-112400916	3378
TCONS_00001419	j	ENSSSCT00000005062	ENSSSCG00000004583	1:112371309-112400916	2152
TCONS_00001420	=	ENSSSCT00000005062	ENSSSCG00000004583	1:112371318-112400238	1705
TCONS_00001421	j	ENSSSCT00000005062	ENSSSCG00000004583	1:112371318-112400916	2256
TCONS_00001422	j	ENSSSCT00000005066	MYO1E	1:112676894-112902152	8690
TCONS_00001423	j	ENSSSCT00000005066	MYO1E	1:112676894-112902152	8159
TCONS_00001424	=	ENSSSCT00000005066	MYO1E	1:112677819-112901999	4190
TCONS_00001425	=	ENSSSCT00000063902	MYO1E	1:112678186-112900972	3195
TCONS_00001426	j	ENSSSCT00000005066	MYO1E	1:112802163-112902152	4704
TCONS_00001427	j	ENSSSCT00000005066	MYO1E	1:112829189-112902152	4660
TCONS_00001428	j	ENSSSCT00000005066	MYO1E	1:112864527-112902152	2058
TCONS_00001429	j	ENSSSCT00000005066	MYO1E	1:112864696-112902152	2420
TCONS_00001430	-	-	-	1:112942561-112944691	689
TCONS_00001431	-	-	-	1:112942606-112943245	639
TCONS_00001432	-	-	-	1:112943390-112944691	1301
TCONS_00001433	=	ENSSSCT00000060969	ENSSSCG00000035260	1:113076909-113077911	561
TCONS_00001434	=	ENSSSCT00000065260	ENSSSCG00000035260	1:113076909-113077911	609
TCONS_00001435	=	ENSSSCT00000005073	SLTM	1:113084863-113134997	4183
TCONS_00001436	=	ENSSSCT00000005071	SLTM	1:113084863-113136206	5272
TCONS_00001437	j	ENSSSCT00000005073	SLTM	1:113084863-113140976	12609
TCONS_00001438	j	ENSSSCT00000005073	SLTM	1:113084863-113140976	13024
TCONS_00001439	j	ENSSSCT00000005073	SLTM	1:113084863-113140976	12596
TCONS_00001440	=	ENSSSCT00000039763	SLTM	1:113085166-113135364	3881
TCONS_00001441	=	ENSSSCT00000043725	SLTM	1:113085210-113134999	4444
TCONS_00001442	=	ENSSSCT00000037087	SLTM	1:113085439-113135345	3991
TCONS_00001443	=	ENSSSCT00000052540	SLTM	1:113085877-113134415	3410
TCONS_00001444	j	ENSSSCT00000005073	SLTM	1:113111381-113140976	13112
TCONS_00001445	j	ENSSSCT00000032619	ADAM10	1:113289083-113363234	1468
TCONS_00001446	=	ENSSSCT00000005076	ADAM10	1:113289083-113410288	4832
TCONS_00001448	=	ENSSSCT00000032619	ADAM10	1:113289209-113412543	6832
TCONS_00001449	=	ENSSSCT00000005075	ENSSSCG00000004594	1:113319159-113319551	345
TCONS_00001450	j	ENSSSCT00000032619	ADAM10	1:113371825-113418536	12192
TCONS_00001451	-	-	-	1:113660721-113681803	450
TCONS_00001452	=	ENSSSCT00000024465	ALDH1A2	1:113825320-114035269	1528
TCONS_00001454	=	ENSSSCT00000027950	ALDH1A2	1:113932738-114037046	4043
TCONS_00001455	-	-	-	1:114041030-114096779	716
TCONS_00001456	-	-	-	1:115078748-115083674	856
TCONS_00001457	-	-	-	1:115078786-115083341	4555
TCONS_00001458	j	ENSSSCT00000028724	ENSSSCG00000026960	1:115219882-115250446	1011
TCONS_00001459	j	ENSSSCT00000028724	ENSSSCG00000026960	1:115219882-115293734	3195
TCONS_00001460	j	ENSSSCT00000028724	ENSSSCG00000026960	1:115219882-115300028	3528
TCONS_00001461	j	ENSSSCT00000028724	ENSSSCG00000026960	1:115219882-115300028	3679
TCONS_00001462	j	ENSSSCT00000028724	ENSSSCG00000026960	1:115219882-115300028	3043
TCONS_00001463	=	ENSSSCT00000028724	ENSSSCG00000026960	1:115219882-115343340	3388
TCONS_00001464	j	ENSSSCT00000028724	ENSSSCG00000026960	1:115219882-115347050	6723
TCONS_00001466	j	ENSSSCT00000028724	ENSSSCG00000026960	1:115219882-115347050	7139
TCONS_00001467	j	ENSSSCT00000028724	ENSSSCG00000026960	1:115219882-115347050	6646
TCONS_00001468	j	ENSSSCT00000028724	ENSSSCG00000026960	1:115219882-115347050	6980
TCONS_00001469	j	ENSSSCT00000028724	ENSSSCG00000026960	1:115219882-115347050	6988
TCONS_00001470	j	ENSSSCT00000028724	ENSSSCG00000026960	1:115219882-115347050	7074
TCONS_00001471	=	ENSSSCT00000043281	ENSSSCG00000026960	1:115220046-115345923	5656
TCONS_00001472	j	ENSSSCT00000028724	ENSSSCG00000026960	1:115220485-115293734	3308
TCONS_00001473	=	ENSSSCT00000054455	ENSSSCG00000026960	1:115220485-115344622	4772
TCONS_00001474	=	ENSSSCT00000040591	ENSSSCG00000026960	1:115249858-115343340	2577
TCONS_00001475	=	ENSSSCT00000040424	ENSSSCG00000026960	1:115285993-115345204	3136
TCONS_00001477	=	ENSSSCT00000054572	ENSSSCG00000026960	1:115309464-115345923	7658
TCONS_00001478	=	ENSSSCT00000053154	ENSSSCG00000026960	1:115316523-115345687	4110
TCONS_00001480	=	ENSSSCT00000064595	ENSSSCG00000026960	1:115320247-115345204	3974
TCONS_00001481	j	ENSSSCT00000028724	ENSSSCG00000026960	1:115336278-115347050	7649
TCONS_00001482	=	ENSSSCT00000005082	MNS1	1:115471921-115529764	5171
TCONS_00001483	=	ENSSSCT00000045655	RF00100	1:115548676-115549000	324
TCONS_00001484	x	ENSSSCT00000005083	TEX9	1:115574050-115579280	5230
TCONS_00001485	x	ENSSSCT00000005083	TEX9	1:115579440-115595476	16036
TCONS_00001486	-	-	-	1:115641850-115642834	984
TCONS_00001487	-	-	-	1:115655587-115656933	1346
TCONS_00001488	-	-	-	1:115732678-115733954	1276
TCONS_00001489	=	ENSSSCT00000040161	RFX7	1:115734357-115871092	7804
TCONS_00001491	=	ENSSSCT00000005084	RFX7	1:115734402-115871092	7612
TCONS_00001492	=	ENSSSCT00000056523	RFX7	1:115811487-115868221	4229
TCONS_00001493	j	ENSSSCT00000005084	RFX7	1:115843269-115873357	13314
TCONS_00001494	j	ENSSSCT00000005084	RFX7	1:115852376-115873357	13928
TCONS_00001495	j	ENSSSCT00000050572	NEDD4	1:115941941-115966687	516
TCONS_00001496	j	ENSSSCT00000050572	NEDD4	1:115941941-116036363	1083
TCONS_00001497	=	ENSSSCT00000024384	NEDD4	1:115941941-116067393	2790
TCONS_00001498	j	ENSSSCT00000050572	NEDD4	1:115941941-116071208	6586
TCONS_00001499	=	ENSSSCT00000050572	NEDD4	1:115941998-116070787	6187
TCONS_00001500	=	ENSSSCT00000039109	NEDD4	1:115992211-116070303	7352
TCONS_00001501	=	ENSSSCT00000066202	NEDD4	1:115992443-116070300	7051
TCONS_00001502	j	ENSSSCT00000050572	NEDD4	1:116038000-116071208	6239
TCONS_00001503	j	ENSSSCT00000050572	NEDD4	1:116049578-116071208	6129
TCONS_00001504	j	ENSSSCT00000050572	NEDD4	1:116049601-116071208	5880
TCONS_00001505	=	ENSSSCT00000054654	PRTG	1:116132153-116268782	3507
TCONS_00001506	=	ENSSSCT00000055885	PRTG	1:116132153-116268782	3813
TCONS_00001507	j	ENSSSCT00000055885	PRTG	1:116195944-116268782	3160
TCONS_00001508	=	ENSSSCT00000005088	PYGO1	1:116293343-116320256	2462
TCONS_00001510	=	ENSSSCT00000005089	DNAAF4	1:116332318-116429983	1596
TCONS_00001511	j	ENSSSCT00000064058	CCPG1	1:116449061-116515352	25032
TCONS_00001512	j	ENSSSCT00000064058	CCPG1	1:116449077-116515352	28371
TCONS_00001513	j	ENSSSCT00000064058	CCPG1	1:116449077-116515352	25328
TCONS_00001514	=	ENSSSCT00000064058	CCPG1	1:116449097-116493613	4176
TCONS_00001515	j	ENSSSCT00000064058	CCPG1	1:116449097-116515352	25769
TCONS_00001516	=	ENSSSCT00000031473	CCPG1	1:116449107-116492907	5515
TCONS_00001517	=	ENSSSCT00000044453	CCPG1	1:116449173-116492119	4844
TCONS_00001518	=	ENSSSCT00000005091	CCPG1	1:116456084-116492332	3431
TCONS_00001519	=	ENSSSCT00000048314	CCPG1	1:116456084-116522390	3572
TCONS_00001520	=	ENSSSCT00000053631	CCPG1	1:116466530-116494522	4081
TCONS_00001521	=	ENSSSCT00000020401	ssc-mir-628	1:116476858-116476938	80
TCONS_00001522	=	ENSSSCT00000037937	RAB27A	1:116532974-116605287	2323
TCONS_00001523	j	ENSSSCT00000005093	RAB27A	1:116532974-116606476	3337
TCONS_00001524	j	ENSSSCT00000005093	RAB27A	1:116532974-116606476	3774
TCONS_00001526	j	ENSSSCT00000005093	RAB27A	1:116532974-116606476	2831
TCONS_00001527	j	ENSSSCT00000005093	RAB27A	1:116532974-116606476	3630
TCONS_00001528	j	ENSSSCT00000005093	RAB27A	1:116532974-116606476	3778
TCONS_00001529	j	ENSSSCT00000005093	RAB27A	1:116532974-116606476	3421
TCONS_00001530	=	ENSSSCT00000005093	RAB27A	1:116533020-116606472	3762
TCONS_00001531	=	ENSSSCT00000060087	RAB27A	1:116533023-116606474	2716
TCONS_00001532	=	ENSSSCT00000059651	RAB27A	1:116533028-116605286	2450
TCONS_00001533	=	ENSSSCT00000055502	RAB27A	1:116533054-116606472	3512
TCONS_00001534	=	ENSSSCT00000038357	RAB27A	1:116566613-116605286	2424
TCONS_00001535	=	ENSSSCT00000057291	RAB27A	1:116566613-116605286	2242
TCONS_00001538	=	ENSSSCT00000041011	RAB27A	1:116577007-116603824	1102
TCONS_00001540	=	ENSSSCT00000026411	ENSSSCG00000024983	1:116612356-116631800	4773
TCONS_00001541	=	ENSSSCT00000005096	WDR72	1:117945981-118159285	3567
TCONS_00001542	j	ENSSSCT00000005096	WDR72	1:117945981-118159860	4799
TCONS_00001543	=	ENSSSCT00000031133	WDR72	1:117972565-118159285	3816
TCONS_00001544	=	ENSSSCT00000005097	ONECUT1	1:118913443-118952453	3866
TCONS_00001545	=	ENSSSCT00000005098	FAM214A	1:118993419-119123616	3911
TCONS_00001547	j	ENSSSCT00000063995	FAM214A	1:119020989-119024190	2752
TCONS_00001548	j	ENSSSCT00000063995	FAM214A	1:119020989-119104858	5548
TCONS_00001549	j	ENSSSCT00000063995	FAM214A	1:119020989-119104858	5422
TCONS_00001550	=	ENSSSCT00000047929	FAM214A	1:119020989-119124457	5185
TCONS_00001551	=	ENSSSCT00000052318	FAM214A	1:119021150-119124457	7288
TCONS_00001552	=	ENSSSCT00000063995	FAM214A	1:119021435-119124457	4968
TCONS_00001553	j	ENSSSCT00000063995	FAM214A	1:119049052-119085055	7172
TCONS_00001554	j	ENSSSCT00000063995	FAM214A	1:119049052-119104858	8513
TCONS_00001555	j	ENSSSCT00000063995	FAM214A	1:119049052-119124457	8150
TCONS_00001556	j	ENSSSCT00000063995	FAM214A	1:119051722-119124457	4708
TCONS_00001557	=	ENSSSCT00000053294	FAM214A	1:119052179-119124454	4303
TCONS_00001558	=	ENSSSCT00000045447	FAM214A	1:119052179-119124457	6515
TCONS_00001559	j	ENSSSCT00000063995	FAM214A	1:119086692-119104858	2444
TCONS_00001560	j	ENSSSCT00000063995	FAM214A	1:119086692-119124457	2081
TCONS_00001561	=	ENSSSCT00000005100	MYO5A	1:119134570-119155227	3017
TCONS_00001563	j	ENSSSCT00000005103	MYO5A	1:119134570-119362727	5082
TCONS_00001564	j	ENSSSCT00000005103	MYO5A	1:119134570-119362727	5421
TCONS_00001565	j	ENSSSCT00000005103	MYO5A	1:119134570-119397319	10620
TCONS_00001566	j	ENSSSCT00000005103	MYO5A	1:119134570-119397319	10461
TCONS_00001567	j	ENSSSCT00000038774	MYO5A	1:119134580-119157318	5192
TCONS_00001568	=	ENSSSCT00000038541	MYO5A	1:119134710-119157166	5149
TCONS_00001569	=	ENSSSCT00000038774	MYO5A	1:119134860-119392862	6095
TCONS_00001570	=	ENSSSCT00000038556	MYO5A	1:119146870-119157166	6996
TCONS_00001571	j	ENSSSCT00000005103	MYO5A	1:119146870-119362727	7281
TCONS_00001572	j	ENSSSCT00000005103	MYO5A	1:119165817-119360199	4546
TCONS_00001573	j	ENSSSCT00000005103	MYO5A	1:119165817-119366146	5952
TCONS_00001574	j	ENSSSCT00000005103	MYO5A	1:119165817-119366146	5871
TCONS_00001575	=	ENSSSCT00000005103	MYO5A	1:119165817-119394725	7794
TCONS_00001576	j	ENSSSCT00000005103	MYO5A	1:119165817-119397319	10610
TCONS_00001577	j	ENSSSCT00000005103	MYO5A	1:119165817-119397319	10232
TCONS_00001578	=	ENSSSCT00000064576	MYO5A	1:119165856-119394030	6985
TCONS_00001579	=	ENSSSCT00000061445	MYO5A	1:119165941-119393347	6439
TCONS_00001580	j	ENSSSCT00000005103	MYO5A	1:119286755-119397319	9256
TCONS_00001581	j	ENSSSCT00000005103	MYO5A	1:119286755-119397319	9412
TCONS_00001582	j	ENSSSCT00000005103	MYO5A	1:119361435-119397319	6590
TCONS_00001583	=	ENSSSCT00000005104	MYO5C	1:119407239-119535011	5406
TCONS_00001584	=	ENSSSCT00000052607	MYO5C	1:119407239-119535011	5325
TCONS_00001585	j	ENSSSCT00000060339	MYO5C	1:119407239-119536492	6800
TCONS_00001587	=	ENSSSCT00000060339	MYO5C	1:119407350-119536426	6794
TCONS_00001588	j	ENSSSCT00000005105	GNB5	1:119537550-119542987	693
TCONS_00001589	=	ENSSSCT00000005105	GNB5	1:119537550-119589863	3926
TCONS_00001591	j	ENSSSCT00000005105	GNB5	1:119537550-119590822	4773
TCONS_00001592	=	ENSSSCT00000050853	GNB5	1:119542638-119587422	1029
TCONS_00001593	=	ENSSSCT00000024996	GNB5	1:119545817-119590822	4535
TCONS_00001594	j	ENSSSCT00000005105	GNB5	1:119565103-119590822	4470
TCONS_00001595	=	ENSSSCT00000005106	ENSSSCG00000004623	1:119597087-119599685	555
TCONS_00001596	j	ENSSSCT00000058640	LEO1	1:119805042-119835628	2272
TCONS_00001597	=	ENSSSCT00000005108	LEO1	1:119805070-119842587	2372
TCONS_00001598	=	ENSSSCT00000058640	LEO1	1:119805070-119857348	2007
TCONS_00001599	=	ENSSSCT00000058087	LYSMD2	1:120009213-120042611	1288
TCONS_00001600	=	ENSSSCT00000057150	LYSMD2	1:120009416-120043121	1110
TCONS_00001601	=	ENSSSCT00000005112	LYSMD2	1:120026337-120043127	1376
TCONS_00001602	=	ENSSSCT00000062759	LYSMD2	1:120026825-120043121	1079
TCONS_00001603	=	ENSSSCT00000056852	ENSSSCG00000031840	1:120125813-120127137	714
TCONS_00001604	j	ENSSSCT00000044786	DMXL2	1:120136936-120298584	11437
TCONS_00001605	j	ENSSSCT00000044786	DMXL2	1:120136936-120298584	11730
TCONS_00001606	j	ENSSSCT00000044786	DMXL2	1:120136936-120298584	12608
TCONS_00001607	j	ENSSSCT00000044786	DMXL2	1:120136936-120298584	12317
TCONS_00001608	=	ENSSSCT00000044786	DMXL2	1:120137809-120297357	9736
TCONS_00001609	=	ENSSSCT00000047160	DMXL2	1:120137809-120297357	9694
TCONS_00001610	=	ENSSSCT00000056758	DMXL2	1:120137809-120297357	9403
TCONS_00001611	=	ENSSSCT00000063297	DMXL2	1:120137809-120297357	9700
TCONS_00001612	=	ENSSSCT00000063400	DMXL2	1:120137809-120297357	9538
TCONS_00001613	=	ENSSSCT00000005115	DMXL2	1:120138348-120298549	10419
TCONS_00001614	j	ENSSSCT00000044786	DMXL2	1:120173719-120298584	13007
TCONS_00001615	j	ENSSSCT00000044786	DMXL2	1:120175550-120227288	2683
TCONS_00001616	=	ENSSSCT00000055178	DMXL2	1:120175550-120297357	9105
TCONS_00001617	j	ENSSSCT00000044786	DMXL2	1:120175550-120298584	10302
TCONS_00001618	j	ENSSSCT00000044786	DMXL2	1:120175550-120298584	10104
TCONS_00001619	=	ENSSSCT00000065596	CYP19A1	1:120477196-120556100	2469
TCONS_00001620	=	ENSSSCT00000044512	CYP19A1	1:120525211-120557776	3990
TCONS_00001621	=	ENSSSCT00000054811	CYP19A1	1:120525211-120627289	2998
TCONS_00001622	=	ENSSSCT00000051839	CYP19A1	1:120525211-120696877	3598
TCONS_00001623	=	ENSSSCT00000063778	CYP19A1	1:120525211-120696877	2577
TCONS_00001624	=	ENSSSCT00000051289	CYP19A1	1:120600535-120627805	2503
TCONS_00001625	=	ENSSSCT00000028692	CYP19A1	1:120600551-120626898	1133
TCONS_00001626	=	ENSSSCT00000023689	CYP19A1	1:120657941-120695889	1582
TCONS_00001627	=	ENSSSCT00000040447	TNFAIP8L3	1:120807327-120853453	5726
TCONS_00001628	=	ENSSSCT00000057361	TNFAIP8L3	1:120807327-120853453	5473
TCONS_00001630	j	ENSSSCT00000040447	TNFAIP8L3	1:120807327-120854057	6217
TCONS_00001632	x	ENSSSCT00000025088	AP4E1	1:120822753-120823336	471
TCONS_00001633	j	ENSSSCT00000005120	SPPL2A	1:121067551-121134887	6481
TCONS_00001634	j	ENSSSCT00000005120	SPPL2A	1:121067551-121134887	5510
TCONS_00001635	=	ENSSSCT00000059371	SPPL2A	1:121067874-121134887	6104
TCONS_00001636	=	ENSSSCT00000058029	SPPL2A	1:121067900-121132240	3248
TCONS_00001637	=	ENSSSCT00000005120	SPPL2A	1:121067998-121133621	4831
TCONS_00001638	j	ENSSSCT00000005121	TRPM7	1:121145856-121222276	15270
TCONS_00001639	j	ENSSSCT00000005121	TRPM7	1:121145856-121222276	23217
TCONS_00001640	j	ENSSSCT00000005121	TRPM7	1:121145856-121248641	19193
TCONS_00001641	j	ENSSSCT00000005121	TRPM7	1:121145856-121248641	20909
TCONS_00001642	=	ENSSSCT00000055327	TRPM7	1:121145856-121248876	6134
TCONS_00001643	=	ENSSSCT00000059656	TRPM7	1:121145856-121248876	6053
TCONS_00001644	=	ENSSSCT00000064891	TRPM7	1:121145856-121248876	6122
TCONS_00001645	j	ENSSSCT00000005121	TRPM7	1:121145856-121250221	9036
TCONS_00001646	j	ENSSSCT00000005121	TRPM7	1:121145856-121250221	17196
TCONS_00001647	j	ENSSSCT00000005121	TRPM7	1:121145856-121250221	15480
TCONS_00001648	=	ENSSSCT00000050675	TRPM7	1:121146125-121249908	6807
TCONS_00001649	=	ENSSSCT00000005121	TRPM7	1:121146142-121250211	7013
TCONS_00001650	j	ENSSSCT00000005121	TRPM7	1:121238686-121250221	2572
TCONS_00001651	=	ENSSSCT00000022170	RF00026	1:121258144-121258243	99
TCONS_00001652	=	ENSSSCT00000005123	USP50	1:121273241-121307029	1140
TCONS_00001653	=	ENSSSCT00000061815	ENSSSCG00000034366	1:121400071-121400711	423
TCONS_00001654	j	ENSSSCT00000059948	GABPB1	1:121411481-121464550	3457
TCONS_00001655	j	ENSSSCT00000059948	GABPB1	1:121411481-121489373	5370
TCONS_00001656	j	ENSSSCT00000059948	GABPB1	1:121411481-121489373	6008
TCONS_00001657	j	ENSSSCT00000059948	GABPB1	1:121411481-121489373	5766
TCONS_00001658	=	ENSSSCT00000053221	GABPB1	1:121412981-121488158	2691
TCONS_00001660	=	ENSSSCT00000059948	GABPB1	1:121413505-121488229	2804
TCONS_00001661	=	ENSSSCT00000040971	GABPB1	1:121413726-121488229	2645
TCONS_00001662	=	ENSSSCT00000005130	GABPB1	1:121454890-121488366	2553
TCONS_00001663	=	ENSSSCT00000005129	HDC	1:121505399-121529584	7301
TCONS_00001664	=	ENSSSCT00000005131	ATP8B4	1:121629032-121913168	3788
TCONS_00001665	=	ENSSSCT00000061016	ATP8B4	1:121629032-121913168	3629
TCONS_00001666	j	ENSSSCT00000005131	ATP8B4	1:121629032-121914802	5941
TCONS_00001668	j	ENSSSCT00000005131	ATP8B4	1:121650977-121914802	5258
TCONS_00001669	j	ENSSSCT00000005131	ATP8B4	1:121655516-121914802	5726
TCONS_00001670	j	ENSSSCT00000005131	ATP8B4	1:121655919-121914802	5682
TCONS_00001671	j	ENSSSCT00000005131	ATP8B4	1:121655919-121914802	5534
TCONS_00001672	=	ENSSSCT00000048557	ATP8B4	1:121733273-121912628	4029
TCONS_00001673	j	ENSSSCT00000005131	ATP8B4	1:121733273-121914802	6044
TCONS_00001675	j	ENSSSCT00000005133	FAM227B	1:122139223-122190479	2770
TCONS_00001676	j	ENSSSCT00000005133	FAM227B	1:122139223-122340397	1616
TCONS_00001677	j	ENSSSCT00000005133	FAM227B	1:122139223-122344653	1529
TCONS_00001678	=	ENSSSCT00000005133	FAM227B	1:122139223-122344653	1634
TCONS_00001679	j	ENSSSCT00000005133	FAM227B	1:122139223-122346237	2144
TCONS_00001680	=	ENSSSCT00000030745	FAM227B	1:122139223-122394729	1529
TCONS_00001681	j	ENSSSCT00000005133	FAM227B	1:122139223-122394950	1971
TCONS_00001682	j	ENSSSCT00000005133	FAM227B	1:122139223-122394950	1855
TCONS_00001683	j	ENSSSCT00000005133	FAM227B	1:122339675-122346237	1130
TCONS_00001684	x	ENSSSCT00000041131	GALK2	1:122344787-122346967	2180
TCONS_00001685	x	ENSSSCT00000041131	GALK2	1:122360922-122369446	7514
TCONS_00001686	j	ENSSSCT00000049645	COPS2	1:122542408-122575007	3695
TCONS_00001687	=	ENSSSCT00000005137	COPS2	1:122542408-122575007	3674
TCONS_00001688	=	ENSSSCT00000049645	COPS2	1:122542414-122575007	3702
TCONS_00001689	-	-	-	1:122575201-122582599	4931
TCONS_00001690	-	-	-	1:122575201-122612622	7694
TCONS_00001691	-	-	-	1:122579675-122582599	729
TCONS_00001692	-	-	-	1:122602271-122604900	2629
TCONS_00001693	-	-	-	1:122615981-122617988	1275
TCONS_00001694	-	-	-	1:122617422-122618066	644
TCONS_00001696	=	ENSSSCT00000005138	SECISBP2L	1:122633907-122689098	7312
TCONS_00001697	=	ENSSSCT00000042081	SECISBP2L	1:122633907-122689098	7177
TCONS_00001698	=	ENSSSCT00000046882	SECISBP2L	1:122633907-122689098	7009
TCONS_00001699	j	ENSSSCT00000005138	SECISBP2L	1:122646660-122690992	28641
TCONS_00001700	j	ENSSSCT00000005140	CEP152	1:122725903-122838071	2052
TCONS_00001701	=	ENSSSCT00000062297	CEP152	1:122725903-122871426	4986
TCONS_00001702	=	ENSSSCT00000052554	CEP152	1:122725903-122871426	5160
TCONS_00001703	j	ENSSSCT00000063098	CEP152	1:122725903-122979845	7261
TCONS_00001704	j	ENSSSCT00000063098	CEP152	1:122725903-122979845	7435
TCONS_00001705	=	ENSSSCT00000062297	CEP152	1:122726672-122868925	1716
TCONS_00001706	=	ENSSSCT00000005140	CEP152	1:122726672-122882158	1878
TCONS_00001707	j	ENSSSCT00000063098	CEP152	1:122837475-122979845	5761
TCONS_00001708	j	ENSSSCT00000063098	CEP152	1:122876140-122979845	5323
TCONS_00001709	j	ENSSSCT00000063098	CEP152	1:122876140-122979845	4935
TCONS_00001710	j	ENSSSCT00000063098	CEP152	1:122876140-122979845	5463
TCONS_00001711	=	ENSSSCT00000005142	CEP152	1:122876140-122979845	5742
TCONS_00001712	=	ENSSSCT00000063098	CEP152	1:122876186-122979843	5052
TCONS_00001713	=	ENSSSCT00000029380	CEP152	1:122876238-122979842	5470
TCONS_00001714	j	ENSSSCT00000005143	FBN1	1:123101259-123330932	7838
TCONS_00001715	=	ENSSSCT00000005143	FBN1	1:123101259-123359568	9560
TCONS_00001717	j	ENSSSCT00000005143	FBN1	1:123331526-123360852	4207
TCONS_00001718	-	-	-	1:123470355-123477054	5094
TCONS_00001719	x	ENSSSCT00000005145	SLC12A1	1:123470355-123530848	4512
TCONS_00001720	x	ENSSSCT00000059650	SLC12A1	1:123470355-123534169	3872
TCONS_00001721	x	ENSSSCT00000005145	SLC12A1	1:123470355-123547758	4175
TCONS_00001722	x	ENSSSCT00000005145	SLC12A1	1:123470355-123547758	3898
TCONS_00001723	-	-	-	1:123474412-123477054	2102
TCONS_00001724	x	ENSSSCT00000005145	SLC12A1	1:123474835-123547758	516
TCONS_00001725	x	ENSSSCT00000005145	SLC12A1	1:123515589-123547758	985
TCONS_00001726	=	ENSSSCT00000040099	MYEF2	1:123582911-123634564	1689
TCONS_00001727	j	ENSSSCT00000005147	MYEF2	1:123582911-123639280	6333
TCONS_00001729	j	ENSSSCT00000005147	MYEF2	1:123600871-123609073	770
TCONS_00001730	=	ENSSSCT00000040489	MYEF2	1:123600871-123638236	5505
TCONS_00001731	=	ENSSSCT00000038900	MYEF2	1:123600872-123635807	2814
TCONS_00001732	=	ENSSSCT00000005147	MYEF2	1:123600894-123637729	5047
TCONS_00001733	=	ENSSSCT00000065720	MYEF2	1:123600927-123635808	2969
TCONS_00001734	=	ENSSSCT00000061412	MYEF2	1:123604257-123634564	1927
TCONS_00001735	j	ENSSSCT00000005147	MYEF2	1:123604257-123639280	6591
TCONS_00001736	j	ENSSSCT00000005147	MYEF2	1:123604257-123639280	6382
TCONS_00001737	j	ENSSSCT00000005147	MYEF2	1:123604257-123639280	6946
TCONS_00001738	j	ENSSSCT00000005147	MYEF2	1:123614937-123639280	6203
TCONS_00001739	=	ENSSSCT00000021254	RF00156	1:125195517-125195652	135
TCONS_00001740	=	ENSSSCT00000060812	SLC30A4	1:126236791-126268096	5695
TCONS_00001741	=	ENSSSCT00000005154	SLC30A4	1:126236975-126263851	1584
TCONS_00001742	j	ENSSSCT00000052964	SLC30A4	1:126236975-126268096	5790
TCONS_00001743	=	ENSSSCT00000052964	SLC30A4	1:126237031-126268094	5796
TCONS_00001744	=	ENSSSCT00000042133	SLC30A4	1:126237031-126268096	5908
TCONS_00001745	=	ENSSSCT00000047687	ENSSSCG00000036905	1:126260192-126260779	465
TCONS_00001746	=	ENSSSCT00000050765	ENSSSCG00000036905	1:126260192-126260779	528
TCONS_00001747	j	ENSSSCT00000047687	ENSSSCG00000036905	1:126260192-126260849	529
TCONS_00001748	=	ENSSSCT00000005158	GATM	1:126361879-126382617	6207
TCONS_00001749	j	ENSSSCT00000005158	GATM	1:126371823-126382617	5818
TCONS_00001750	=	ENSSSCT00000039404	ENSSSCG00000004674	1:126549080-126566137	1959
TCONS_00001751	=	ENSSSCT00000005160	ENSSSCG00000004674	1:126549080-126570655	2643
TCONS_00001752	j	ENSSSCT00000005160	ENSSSCG00000004674	1:126549080-126570678	2664
TCONS_00001753	j	ENSSSCT00000005160	ENSSSCG00000004674	1:126558119-126570678	1942
TCONS_00001754	j	ENSSSCT00000005163	DUOXA1	1:126598806-126617043	2884
TCONS_00001755	j	ENSSSCT00000005163	DUOXA1	1:126598847-126617043	2757
TCONS_00001756	j	ENSSSCT00000005163	DUOXA1	1:126605141-126615014	1570
TCONS_00001757	=	ENSSSCT00000005163	DUOXA1	1:126605141-126615719	1570
TCONS_00001759	j	ENSSSCT00000005163	DUOXA1	1:126605141-126617043	2808
TCONS_00001760	=	ENSSSCT00000005164	DUOX2	1:126620509-126641406	6085
TCONS_00001761	j	ENSSSCT00000005164	DUOX2	1:126620509-126642480	6926
TCONS_00001762	j	ENSSSCT00000005164	DUOX2	1:126620509-126642480	7424
TCONS_00001763	j	ENSSSCT00000005164	DUOX2	1:126620509-126642480	7191
TCONS_00001764	=	ENSSSCT00000052306	DUOX2	1:126621230-126638769	3892
TCONS_00001765	=	ENSSSCT00000034478	DUOX2	1:126621230-126642480	7064
TCONS_00001766	=	ENSSSCT00000038251	DUOX2	1:126621230-126642480	7329
TCONS_00001767	=	ENSSSCT00000046180	DUOX2	1:126621230-126642480	6797
TCONS_00001768	=	ENSSSCT00000058143	ENSSSCG00000040862	1:126784319-126784696	270
TCONS_00001769	=	ENSSSCT00000052986	ENSSSCG00000037543	1:126891671-126894854	1419
TCONS_00001770	=	ENSSSCT00000005172	SPG11	1:126898811-126997562	7227
TCONS_00001771	j	ENSSSCT00000022579	SPG11	1:126898811-127001699	11226
TCONS_00001772	j	ENSSSCT00000022579	SPG11	1:126901987-126951998	5307
TCONS_00001773	j	ENSSSCT00000022579	SPG11	1:126901987-126955668	5414
TCONS_00001774	j	ENSSSCT00000022579	SPG11	1:126901987-126955668	5479
TCONS_00001775	j	ENSSSCT00000022579	SPG11	1:126901987-126994910	7354
TCONS_00001776	=	ENSSSCT00000028050	SPG11	1:126901987-126997562	7404
TCONS_00001777	=	ENSSSCT00000022579	SPG11	1:126901987-126999239	9189
TCONS_00001779	j	ENSSSCT00000022579	SPG11	1:126901987-127001699	11584
TCONS_00001780	=	ENSSSCT00000045446	SPG11	1:126905335-126998841	8225
TCONS_00001781	j	ENSSSCT00000022579	SPG11	1:126913957-127001699	10917
TCONS_00001782	j	ENSSSCT00000022579	SPG11	1:126970906-126974942	1505
TCONS_00001783	j	ENSSSCT00000022579	SPG11	1:126970914-127001699	7238
TCONS_00001784	j	ENSSSCT00000022579	SPG11	1:126975081-126994910	2953
TCONS_00001785	j	ENSSSCT00000022579	SPG11	1:126975081-126997151	3777
TCONS_00001786	j	ENSSSCT00000022579	SPG11	1:126975081-127001699	7248
TCONS_00001787	=	ENSSSCT00000058863	FRMD5	1:127593341-127650662	4598
TCONS_00001788	j	ENSSSCT00000058863	FRMD5	1:127643171-127650662	4358
TCONS_00001789	=	ENSSSCT00000005184	FRMD5	1:127643468-127647533	1111
TCONS_00001790	j	ENSSSCT00000066231	MFAP1	1:127740717-127750985	2527
TCONS_00001791	=	ENSSSCT00000066231	MFAP1	1:127740717-127760475	7049
TCONS_00001792	j	ENSSSCT00000005188	SERINC4	1:127740717-127764787	8504
TCONS_00001793	=	ENSSSCT00000005188	SERINC4	1:127760373-127764787	1557
TCONS_00001794	=	ENSSSCT00000020329	MIR1282	1:127766051-127766152	101
TCONS_00001795	=	ENSSSCT00000005189	ELL3	1:127781362-127784801	1771
TCONS_00001796	x	ENSSSCT00000005190	PDIA3	1:127801395-127811554	10159
TCONS_00001797	j	ENSSSCT00000005191	ENSSSCG00000004701	1:127814425-127823473	2641
TCONS_00001798	j	ENSSSCT00000005191	ENSSSCG00000004701	1:127814425-127830785	7636
TCONS_00001799	j	ENSSSCT00000005191	ENSSSCG00000004701	1:127814425-127830785	4411
TCONS_00001800	j	ENSSSCT00000005191	ENSSSCG00000004701	1:127814425-127830785	4920
TCONS_00001801	j	ENSSSCT00000005191	ENSSSCG00000004701	1:127814468-127819345	3568
TCONS_00001802	j	ENSSSCT00000005191	ENSSSCG00000004701	1:127814468-127830785	7444
TCONS_00001803	j	ENSSSCT00000005191	ENSSSCG00000004701	1:127814482-127823473	2988
TCONS_00001804	=	ENSSSCT00000005191	ENSSSCG00000004701	1:127814796-127830785	3931
TCONS_00001805	=	ENSSSCT00000040220	ENSSSCG00000004701	1:127814796-127830785	3763
TCONS_00001806	j	ENSSSCT00000005191	ENSSSCG00000004701	1:127817055-127830785	4916
TCONS_00001807	j	ENSSSCT00000005191	ENSSSCG00000004701	1:127817055-127830785	6027
TCONS_00001808	j	ENSSSCT00000005191	ENSSSCG00000004701	1:127817985-127820850	2069
TCONS_00001809	=	ENSSSCT00000021059	RF00001	1:127830195-127830313	118
TCONS_00001810	=	ENSSSCT00000005193	STRC	1:127835820-127852273	5283
TCONS_00001811	=	ENSSSCT00000060117	STRC	1:127835820-127852273	5277
TCONS_00001812	=	ENSSSCT00000050455	PPIP5K1	1:127865571-127915445	5712
TCONS_00001813	j	ENSSSCT00000050838	PPIP5K1	1:127865571-127915455	5608
TCONS_00001814	j	ENSSSCT00000050838	PPIP5K1	1:127865571-127915455	5747
TCONS_00001815	j	ENSSSCT00000050838	PPIP5K1	1:127865571-127915455	6083
TCONS_00001816	j	ENSSSCT00000050838	PPIP5K1	1:127865571-127915455	5933
TCONS_00001817	j	ENSSSCT00000050838	PPIP5K1	1:127865571-127915455	5572
TCONS_00001818	=	ENSSSCT00000050838	PPIP5K1	1:127865575-127915454	5862
TCONS_00001819	=	ENSSSCT00000058296	PPIP5K1	1:127865575-127915455	5713
TCONS_00001820	=	ENSSSCT00000042843	PPIP5K1	1:127865577-127915449	5642
TCONS_00001821	=	ENSSSCT00000063903	PPIP5K1	1:127869889-127915448	5599
TCONS_00001822	=	ENSSSCT00000005195	PPIP5K1	1:127870934-127914431	4695
TCONS_00001823	j	ENSSSCT00000057371	TP53BP1	1:127937445-128029531	7906
TCONS_00001824	j	ENSSSCT00000057371	TP53BP1	1:127937445-128029531	7816
TCONS_00001825	j	ENSSSCT00000057371	TP53BP1	1:127958494-127974092	1536
TCONS_00001826	=	ENSSSCT00000055830	TP53BP1	1:127958494-128028549	5971
TCONS_00001827	j	ENSSSCT00000057371	TP53BP1	1:127958494-128029531	8074
TCONS_00001828	j	ENSSSCT00000057371	TP53BP1	1:127958494-128029531	6581
TCONS_00001829	j	ENSSSCT00000057371	TP53BP1	1:127958494-128029531	7524
TCONS_00001831	=	ENSSSCT00000039043	TP53BP1	1:127958515-128028713	6087
TCONS_00001832	=	ENSSSCT00000057371	TP53BP1	1:127958516-128028914	6407
TCONS_00001833	=	ENSSSCT00000048296	TP53BP1	1:127958530-128028708	5965
TCONS_00001834	=	ENSSSCT00000060247	TP53BP1	1:127958550-128028713	6022
TCONS_00001835	j	ENSSSCT00000057371	TP53BP1	1:127970730-128021106	5231
TCONS_00001836	j	ENSSSCT00000057371	TP53BP1	1:127991271-128029531	5513
TCONS_00001837	j	ENSSSCT00000057371	TP53BP1	1:127991310-128029531	6717
TCONS_00001838	j	ENSSSCT00000005201	ENSSSCG00000004709	1:128083904-128096070	4808
TCONS_00001839	j	ENSSSCT00000005201	ENSSSCG00000004709	1:128083936-128096070	6729
TCONS_00001840	j	ENSSSCT00000005201	ENSSSCG00000004709	1:128084017-128096070	6437
TCONS_00001841	=	ENSSSCT00000005201	ENSSSCG00000004709	1:128085089-128088864	1159
TCONS_00001842	=	ENSSSCT00000059846	ENSSSCG00000036032	1:128093792-128096148	882
TCONS_00001843	=	ENSSSCT00000005203	LCMT2	1:128125667-128127919	2252
TCONS_00001844	=	ENSSSCT00000005204	TGM7	1:128168954-128184495	2121
TCONS_00001845	j	ENSSSCT00000056889	TGM5	1:128191593-128217248	3931
TCONS_00001846	j	ENSSSCT00000056889	TGM5	1:128191593-128217248	3465
TCONS_00001847	j	ENSSSCT00000056889	TGM5	1:128191593-128217248	2746
TCONS_00001848	=	ENSSSCT00000056889	TGM5	1:128193606-128216866	2142
TCONS_00001849	=	ENSSSCT00000005205	TGM5	1:128196694-128216866	2154
TCONS_00001850	=	ENSSSCT00000005206	EPB42	1:128231850-128255893	5545
TCONS_00001851	=	ENSSSCT00000057279	EPB42	1:128231850-128255893	5302
TCONS_00001852	=	ENSSSCT00000040969	ssc-mir-9838	1:128305320-128305392	72
TCONS_00001853	=	ENSSSCT00000046627	UBR1	1:128319310-128474302	6732
TCONS_00001855	j	ENSSSCT00000046627	UBR1	1:128319310-128475635	8008
TCONS_00001856	j	ENSSSCT00000046627	UBR1	1:128319310-128475635	7733
TCONS_00001857	j	ENSSSCT00000046627	UBR1	1:128319310-128475635	11553
TCONS_00001858	j	ENSSSCT00000046627	UBR1	1:128319310-128475635	11464
TCONS_00001859	j	ENSSSCT00000046627	UBR1	1:128319310-128475635	12198
TCONS_00001860	j	ENSSSCT00000046627	UBR1	1:128319310-128475635	8653
TCONS_00001861	j	ENSSSCT00000046627	UBR1	1:128331602-128448778	9194
TCONS_00001862	=	ENSSSCT00000005209	UBR1	1:128332109-128473230	5205
TCONS_00001863	=	ENSSSCT00000032277	UBR1	1:128332109-128473230	5019
TCONS_00001864	j	ENSSSCT00000046627	UBR1	1:128391516-128431833	2586
TCONS_00001865	j	ENSSSCT00000046627	UBR1	1:128391516-128475635	10069
TCONS_00001866	j	ENSSSCT00000046627	UBR1	1:128450615-128475635	3607
TCONS_00001867	j	ENSSSCT00000005210	TTBK2	1:128489681-128533137	2600
TCONS_00001868	j	ENSSSCT00000005210	TTBK2	1:128489681-128583408	2029
TCONS_00001869	j	ENSSSCT00000005210	TTBK2	1:128489681-128620823	4117
TCONS_00001870	j	ENSSSCT00000005210	TTBK2	1:128489681-128620823	4043
TCONS_00001871	=	ENSSSCT00000005210	TTBK2	1:128489681-128635504	5771
TCONS_00001872	j	ENSSSCT00000005210	TTBK2	1:128489681-128640089	10394
TCONS_00001873	j	ENSSSCT00000005210	TTBK2	1:128489681-128640089	10468
TCONS_00001876	=	ENSSSCT00000064019	TTBK2	1:128489702-128635503	5675
TCONS_00001877	j	ENSSSCT00000005210	TTBK2	1:128617178-128640089	9884
TCONS_00001878	j	ENSSSCT00000005211	CDAN1	1:128641431-128656291	5291
TCONS_00001879	j	ENSSSCT00000005211	CDAN1	1:128641431-128656291	5982
TCONS_00001880	j	ENSSSCT00000005211	CDAN1	1:128641431-128656291	5463
TCONS_00001881	j	ENSSSCT00000005211	CDAN1	1:128641431-128656291	5819
TCONS_00001882	j	ENSSSCT00000005211	CDAN1	1:128641431-128656291	5686
TCONS_00001883	j	ENSSSCT00000005211	CDAN1	1:128641431-128656291	5312
TCONS_00001884	j	ENSSSCT00000005211	CDAN1	1:128641431-128656291	5893
TCONS_00001885	=	ENSSSCT00000005211	CDAN1	1:128641451-128654897	3705
TCONS_00001886	j	ENSSSCT00000005211	CDAN1	1:128644422-128656291	4035
TCONS_00001887	=	ENSSSCT00000047227	ENSSSCG00000038659	1:128817180-128818044	561
TCONS_00001888	=	ENSSSCT00000060189	ENSSSCG00000038659	1:128817180-128818044	609
TCONS_00001889	=	ENSSSCT00000005219	LRRC57	1:128839074-128847168	3128
TCONS_00001891	=	ENSSSCT00000060086	LRRC57	1:128839119-128847168	3174
TCONS_00001892	=	ENSSSCT00000005218	ZNF106	1:128893972-128955745	5814
TCONS_00001893	=	ENSSSCT00000051654	ZNF106	1:128893972-128958179	8334
TCONS_00001896	=	ENSSSCT00000062540	ZNF106	1:128893979-128957305	7391
TCONS_00001897	=	ENSSSCT00000065521	ZNF106	1:128893980-128956284	6283
TCONS_00001898	=	ENSSSCT00000040719	ZNF106	1:128920384-128958179	8453
TCONS_00001899	=	ENSSSCT00000064218	ZNF106	1:128926453-128957304	7189
TCONS_00001900	=	ENSSSCT00000042906	ZNF106	1:128926453-128957305	5086
TCONS_00001901	=	ENSSSCT00000044440	ZNF106	1:128931275-128956539	5546
TCONS_00001903	j	ENSSSCT00000005226	TMEM87A	1:129098246-129142150	3052
TCONS_00001904	j	ENSSSCT00000005226	TMEM87A	1:129098378-129142150	3264
TCONS_00001905	=	ENSSSCT00000005226	TMEM87A	1:129098418-129142150	2941
TCONS_00001906	=	ENSSSCT00000061261	TMEM87A	1:129098448-129141515	2279
TCONS_00001907	=	ENSSSCT00000005227	VPS39	1:129144343-129198757	4929
TCONS_00001908	j	ENSSSCT00000005227	VPS39	1:129144343-129215221	9799
TCONS_00001909	j	ENSSSCT00000005227	VPS39	1:129144343-129215221	9694
TCONS_00001910	j	ENSSSCT00000005227	VPS39	1:129144343-129215221	9734
TCONS_00001911	j	ENSSSCT00000005227	VPS39	1:129144343-129215221	9691
TCONS_00001912	j	ENSSSCT00000005227	VPS39	1:129144343-129215221	10197
TCONS_00001913	j	ENSSSCT00000005227	VPS39	1:129144343-129215221	9832
TCONS_00001914	=	ENSSSCT00000051894	VPS39	1:129144366-129198752	4763
TCONS_00001915	=	ENSSSCT00000062609	VPS39	1:129144366-129198761	4812
TCONS_00001916	=	ENSSSCT00000036856	VPS39	1:129144485-129196631	2520
TCONS_00001917	=	ENSSSCT00000041359	VPS39	1:129144485-129201212	7209
TCONS_00001918	=	ENSSSCT00000005228	PLA2G4F	1:129201101-129215221	2559
TCONS_00001919	=	ENSSSCT00000005229	PLA2G4D	1:129247254-129270027	2415
TCONS_00001920	=	ENSSSCT00000049474	PLA2G4E	1:129289762-129362941	4612
TCONS_00001921	j	ENSSSCT00000022785	EHD4	1:129374531-129406025	2316
TCONS_00001922	=	ENSSSCT00000022785	EHD4	1:129374546-129460222	5154
TCONS_00001923	j	ENSSSCT00000022785	EHD4	1:129439243-129460222	5649
TCONS_00001924	=	ENSSSCT00000005232	SPTBN5	1:129463701-129511568	10866
TCONS_00001926	=	ENSSSCT00000047418	ENSSSCG00000033197	1:129675105-129675291	186
TCONS_00001927	-	-	-	1:129714848-129717077	2229
TCONS_00001928	-	-	-	1:129718058-129721982	3924
TCONS_00001929	-	-	-	1:129728027-129730563	2536
TCONS_00001930	-	-	-	1:129731423-129732677	1254
TCONS_00001931	j	ENSSSCT00000058008	ENSSSCG00000039919	1:129737843-129753958	15805
TCONS_00001932	j	ENSSSCT00000058008	ENSSSCG00000039919	1:129738040-129753958	15382
TCONS_00001933	j	ENSSSCT00000058008	ENSSSCG00000039919	1:129738040-129753958	15382
TCONS_00001934	=	ENSSSCT00000046850	ENSSSCG00000039919	1:129738105-129741035	1758
TCONS_00001935	=	ENSSSCT00000048444	ENSSSCG00000039919	1:129738105-129741414	2091
TCONS_00001936	=	ENSSSCT00000058008	ENSSSCG00000039919	1:129738105-129741414	2094
TCONS_00001937	=	ENSSSCT00000041091	ENSSSCG00000039919	1:129739719-129740810	690
TCONS_00001938	-	-	-	1:129754535-129762323	5361
TCONS_00001939	-	-	-	1:129754837-129758073	3236
TCONS_00001940	-	-	-	1:129758540-129762323	3783
TCONS_00001941	j	ENSSSCT00000046153	RPAP1	1:129838331-129852138	3551
TCONS_00001942	j	ENSSSCT00000046153	RPAP1	1:129838331-129860971	9117
TCONS_00001943	j	ENSSSCT00000046153	RPAP1	1:129838331-129860971	8931
TCONS_00001944	=	ENSSSCT00000038841	RPAP1	1:129838331-129860971	8660
TCONS_00001945	=	ENSSSCT00000046153	RPAP1	1:129838331-129860971	8882
TCONS_00001946	=	ENSSSCT00000052234	RPAP1	1:129838331-129860971	8729
TCONS_00001947	=	ENSSSCT00000058579	RPAP1	1:129838331-129860971	8747
TCONS_00001948	=	ENSSSCT00000060884	RPAP1	1:129838331-129860971	8645
TCONS_00001949	j	ENSSSCT00000046153	RPAP1	1:129838331-129866834	8936
TCONS_00001950	j	ENSSSCT00000046153	RPAP1	1:129838331-129866834	8581
TCONS_00001951	j	ENSSSCT00000046153	RPAP1	1:129838331-129866834	9979
TCONS_00001952	j	ENSSSCT00000046153	RPAP1	1:129838331-129866834	9669
TCONS_00001953	j	ENSSSCT00000046153	RPAP1	1:129838331-129866834	8994
TCONS_00001954	j	ENSSSCT00000046153	RPAP1	1:129838331-129866834	8841
TCONS_00001955	j	ENSSSCT00000046153	RPAP1	1:129838331-129866834	9045
TCONS_00001956	=	ENSSSCT00000005244	RPAP1	1:129838592-129857041	3934
TCONS_00001957	j	ENSSSCT00000046153	RPAP1	1:129849205-129866834	7372
TCONS_00001958	j	ENSSSCT00000046153	RPAP1	1:129852482-129866834	5940
TCONS_00001959	j	ENSSSCT00000046153	RPAP1	1:129855334-129866834	5276
TCONS_00001960	=	ENSSSCT00000048051	ENSSSCG00000040414	1:129859478-129866808	1581
TCONS_00001961	=	ENSSSCT00000043805	ENSSSCG00000040414	1:129861216-129866834	1533
TCONS_00001962	=	ENSSSCT00000021524	RF00026	1:129937947-129938050	103
TCONS_00001963	=	ENSSSCT00000005247	NDUFAF1	1:129967436-129990494	1411
TCONS_00001964	j	ENSSSCT00000050823	NDUFAF1	1:129967436-129992590	3200
TCONS_00001965	j	ENSSSCT00000050823	NDUFAF1	1:129968505-129992590	3290
TCONS_00001966	j	ENSSSCT00000050823	NDUFAF1	1:129968513-129980239	1259
TCONS_00001967	=	ENSSSCT00000050823	NDUFAF1	1:129968515-129991916	2299
TCONS_00001968	=	ENSSSCT00000052442	NDUFAF1	1:129968534-129992246	2731
TCONS_00001969	=	ENSSSCT00000005249	OIP5	1:130036480-130047023	2974
TCONS_00001970	j	ENSSSCT00000005249	OIP5	1:130036480-130053227	9573
TCONS_00001972	=	ENSSSCT00000026059	ENSSSCG00000035779	1:130100666-130100837	171
TCONS_00001973	j	ENSSSCT00000050526	EXD1	1:130112846-130123712	742
TCONS_00001974	=	ENSSSCT00000050526	EXD1	1:130112846-130153479	2856
TCONS_00001975	j	ENSSSCT00000050526	EXD1	1:130112846-130153483	3046
TCONS_00001976	j	ENSSSCT00000050526	EXD1	1:130112846-130153483	2791
TCONS_00001977	j	ENSSSCT00000050526	EXD1	1:130114209-130153483	4033
TCONS_00001978	=	ENSSSCT00000005251	EXD1	1:130115665-130152660	1685
TCONS_00001979	=	ENSSSCT00000048087	EXD1	1:130125698-130153483	3116
TCONS_00001980	j	ENSSSCT00000050526	EXD1	1:130130753-130153483	2346
TCONS_00001981	j	ENSSSCT00000050526	EXD1	1:130130753-130153483	2413
TCONS_00001982	j	ENSSSCT00000050526	EXD1	1:130143827-130153483	2198
TCONS_00001983	j	ENSSSCT00000005252	INO80	1:130201197-130307009	4997
TCONS_00001984	j	ENSSSCT00000005252	INO80	1:130201524-130338662	8829
TCONS_00001985	=	ENSSSCT00000005252	INO80	1:130201842-130342839	6291
TCONS_00001986	j	ENSSSCT00000005252	INO80	1:130201842-130343143	6914
TCONS_00001987	j	ENSSSCT00000005252	INO80	1:130232907-130305240	7396
TCONS_00001988	j	ENSSSCT00000005252	INO80	1:130233251-130343143	6683
TCONS_00001989	=	ENSSSCT00000057611	INO80	1:130233563-130374040	6254
TCONS_00001990	j	ENSSSCT00000005252	INO80	1:130305446-130374040	3689
TCONS_00001991	j	ENSSSCT00000005252	INO80	1:130322776-130343143	4584
TCONS_00001992	j	ENSSSCT00000005252	INO80	1:130333881-130343143	4786
TCONS_00001993	=	ENSSSCT00000026863	RF00026	1:130346295-130346434	139
TCONS_00001994	x	ENSSSCT00000005256	VPS18	1:130419370-130436677	679
TCONS_00001995	j	ENSSSCT00000005257	RHOV	1:130443565-130447301	3338
TCONS_00001996	j	ENSSSCT00000005257	RHOV	1:130443565-130457062	3113
TCONS_00001997	j	ENSSSCT00000005257	RHOV	1:130443565-130457062	3109
TCONS_00001998	=	ENSSSCT00000005257	RHOV	1:130443683-130447301	3224
TCONS_00001999	o	ENSSSCT00000005259	ENSSSCG00000004760	1:130484636-130485471	835
TCONS_00002000	=	ENSSSCT00000005259	ENSSSCG00000004760	1:130485345-130509560	945
TCONS_00002001	=	ENSSSCT00000006171	ENSSSCG00000005612	1:130495972-130496329	270
TCONS_00002002	j	ENSSSCT00000057777	DNAJC17	1:130511179-130559228	8910
TCONS_00002003	=	ENSSSCT00000060746	DNAJC17	1:130516724-130559227	6089
TCONS_00002004	=	ENSSSCT00000057777	DNAJC17	1:130516724-130559228	3255
TCONS_00002005	=	ENSSSCT00000005261	DNAJC17	1:130516801-130559228	941
TCONS_00002006	=	ENSSSCT00000057818	DNAJC17	1:130516837-130559160	741
TCONS_00002007	=	ENSSSCT00000005264	RMDN3	1:130574358-130591576	2389
TCONS_00002008	j	ENSSSCT00000005264	RMDN3	1:130574397-130591946	2524
TCONS_00002009	j	ENSSSCT00000005264	RMDN3	1:130574397-130591946	3294
TCONS_00002010	=	ENSSSCT00000065283	RMDN3	1:130574408-130591576	2499
TCONS_00002011	=	ENSSSCT00000055579	RF00568	1:130733595-130733714	119
TCONS_00002012	=	ENSSSCT00000062778	RF00568	1:130734381-130734517	136
TCONS_00002013	j	ENSSSCT00000043721	CCDC32	1:130753139-130764746	1507
TCONS_00002014	j	ENSSSCT00000043721	CCDC32	1:130753208-130764746	1433
TCONS_00002015	=	ENSSSCT00000043721	CCDC32	1:130753221-130764746	1615
TCONS_00002016	=	ENSSSCT00000037265	RF00026	1:130829233-130829340	107
TCONS_00002017	=	ENSSSCT00000005276	CCDC9B	1:130973963-130980645	2191
TCONS_00002018	j	ENSSSCT00000005279	CCDC9B	1:130973963-130984216	5957
TCONS_00002019	j	ENSSSCT00000005279	CCDC9B	1:130973963-130984216	6102
TCONS_00002020	j	ENSSSCT00000005279	CCDC9B	1:130973963-130984216	5994
TCONS_00002021	j	ENSSSCT00000005279	CCDC9B	1:130973963-130984216	5869
TCONS_00002023	=	ENSSSCT00000005279	CCDC9B	1:130974665-130983971	4974
TCONS_00002024	=	ENSSSCT00000038655	CCDC9B	1:130974888-130983970	5430
TCONS_00002025	j	ENSSSCT00000005279	CCDC9B	1:130974888-130984216	5784
TCONS_00002026	j	ENSSSCT00000005279	CCDC9B	1:130974888-130984216	5633
TCONS_00002027	j	ENSSSCT00000005279	CCDC9B	1:130974888-130984216	5126
TCONS_00002028	=	ENSSSCT00000062730	CCDC9B	1:130974915-130983969	5501
TCONS_00002029	j	ENSSSCT00000005279	CCDC9B	1:130976089-130984216	5298
TCONS_00002030	=	ENSSSCT00000052016	PLCB2	1:131004873-131028162	4307
TCONS_00002031	j	ENSSSCT00000052016	PLCB2	1:131004873-131028484	4710
TCONS_00002032	j	ENSSSCT00000052016	PLCB2	1:131004873-131028484	4634
TCONS_00002033	j	ENSSSCT00000052016	PLCB2	1:131004873-131028484	4534
TCONS_00002034	j	ENSSSCT00000052016	PLCB2	1:131011154-131019154	1392
TCONS_00002035	=	ENSSSCT00000005278	PLCB2	1:131011154-131028162	3504
TCONS_00002036	=	ENSSSCT00000051211	ANKRD63	1:131034251-131035406	1155
TCONS_00002037	j	ENSSSCT00000063022	BMF	1:131178202-131201876	6979
TCONS_00002038	j	ENSSSCT00000063022	BMF	1:131178202-131201876	7613
TCONS_00002040	j	ENSSSCT00000063022	BMF	1:131178260-131201876	7583
TCONS_00002041	j	ENSSSCT00000063022	BMF	1:131178303-131201876	7557
TCONS_00002042	=	ENSSSCT00000056293	BMF	1:131178306-131200388	7912
TCONS_00002044	j	ENSSSCT00000063022	BMF	1:131178306-131201876	8052
TCONS_00002045	j	ENSSSCT00000063022	BMF	1:131178306-131201876	7286
TCONS_00002046	=	ENSSSCT00000063022	BMF	1:131178314-131199664	4877
TCONS_00002048	j	ENSSSCT00000063022	BMF	1:131178314-131201876	6895
TCONS_00002049	=	ENSSSCT00000056566	BMF	1:131178318-131199664	6793
TCONS_00002050	j	ENSSSCT00000063022	BMF	1:131178329-131201876	6664
TCONS_00002051	=	ENSSSCT00000047289	BMF	1:131178330-131200388	6070
TCONS_00002052	j	ENSSSCT00000063022	BMF	1:131178352-131201876	8943
TCONS_00002053	j	ENSSSCT00000063022	BMF	1:131178355-131201876	8459
TCONS_00002054	=	ENSSSCT00000058226	BMF	1:131181058-131215389	2093
TCONS_00002055	=	ENSSSCT00000053992	SRP14	1:131241542-131247832	3561
TCONS_00002056	=	ENSSSCT00000005284	SRP14	1:131241611-131247966	3364
TCONS_00002057	j	ENSSSCT00000057996	GPR176	1:131355326-131360532	896
TCONS_00002058	=	ENSSSCT00000057996	GPR176	1:131355326-131493339	2392
TCONS_00002059	j	ENSSSCT00000057996	GPR176	1:131355326-131493711	3062
TCONS_00002060	j	ENSSSCT00000057996	GPR176	1:131355326-131493810	2332
TCONS_00002061	j	ENSSSCT00000057996	GPR176	1:131355326-131493810	2491
TCONS_00002062	j	ENSSSCT00000057996	GPR176	1:131364158-131493810	2504
TCONS_00002063	j	ENSSSCT00000057996	GPR176	1:131365086-131493810	2344
TCONS_00002064	=	ENSSSCT00000005286	GPR176	1:131485961-131493810	1431
TCONS_00002065	=	ENSSSCT00000058778	FSIP1	1:131509812-131717097	2611
TCONS_00002066	-	-	-	1:132101196-132259563	1454
TCONS_00002067	-	-	-	1:132105524-132388434	1111
TCONS_00002068	-	-	-	1:132105552-132507829	713
TCONS_00002069	-	-	-	1:132181656-132182231	575
TCONS_00002070	-	-	-	1:132243768-132244701	933
TCONS_00002071	-	-	-	1:132287987-132288545	558
TCONS_00002073	j	ENSSSCT00000063253	RASGRP1	1:132701574-132769890	3168
TCONS_00002074	=	ENSSSCT00000063253	RASGRP1	1:132702523-132786534	5350
TCONS_00002075	=	ENSSSCT00000005290	RASGRP1	1:132702545-132786531	5189
TCONS_00002076	=	ENSSSCT00000062916	RASGRP1	1:132702735-132787913	6307
TCONS_00002077	=	ENSSSCT00000041007	RASGRP1	1:132743035-132786534	5290
TCONS_00002078	j	ENSSSCT00000063253	RASGRP1	1:132750912-132789951	8838
TCONS_00002079	-	-	-	1:133016533-133135879	467
TCONS_00002080	-	-	-	1:133135155-133136187	1032
TCONS_00002081	=	ENSSSCT00000063964	RF00026	1:133738538-133738645	107
TCONS_00002082	j	ENSSSCT00000052424	MEIS2	1:134013819-134223013	2994
TCONS_00002083	=	ENSSSCT00000052424	MEIS2	1:134013819-134223013	3015
TCONS_00002084	=	ENSSSCT00000046011	MEIS2	1:134014524-134223005	2753
TCONS_00002085	=	ENSSSCT00000005294	MEIS2	1:134015176-134223005	2770
TCONS_00002086	j	ENSSSCT00000052424	MEIS2	1:134019433-134223013	2489
TCONS_00002087	j	ENSSSCT00000052424	MEIS2	1:134019433-134223013	2393
TCONS_00002088	=	ENSSSCT00000040288	ENSSSCG00000040129	1:134097391-134097627	201
TCONS_00002089	=	ENSSSCT00000051282	ENSSSCG00000040326	1:134226678-134226921	243
TCONS_00002090	j	ENSSSCT00000029836	DPH6	1:135577937-135712310	661
TCONS_00002091	j	ENSSSCT00000029836	DPH6	1:135577937-135889674	3013
TCONS_00002092	j	ENSSSCT00000029836	DPH6	1:135577937-135903884	3231
TCONS_00002093	j	ENSSSCT00000029836	DPH6	1:135577937-136019341	11324
TCONS_00002094	j	ENSSSCT00000029836	DPH6	1:135577937-136019341	10267
TCONS_00002095	j	ENSSSCT00000029836	DPH6	1:135577937-136019341	6249
TCONS_00002096	j	ENSSSCT00000029836	DPH6	1:135577937-136019341	6161
TCONS_00002097	=	ENSSSCT00000041791	DPH6	1:135577965-135753796	5587
TCONS_00002098	=	ENSSSCT00000029836	DPH6	1:135577965-135812007	983
TCONS_00002099	=	ENSSSCT00000043411	DPH6	1:135582021-135753796	5614
TCONS_00002100	j	ENSSSCT00000029836	DPH6	1:135584992-135753796	5544
TCONS_00002101	=	ENSSSCT00000047037	ENSSSCG00000033875	1:135887798-136019341	5112
TCONS_00002102	=	ENSSSCT00000063776	ENSSSCG00000033875	1:135887823-136014632	5453
TCONS_00002103	=	ENSSSCT00000051723	ENSSSCG00000033875	1:135902084-136015475	5179
TCONS_00002104	j	ENSSSCT00000063776	ENSSSCG00000033875	1:135928240-135933582	1644
TCONS_00002105	=	ENSSSCT00000023009	ENSSSCG00000030003	1:136096759-136097230	471
TCONS_00002106	=	ENSSSCT00000046632	RF00026	1:136111557-136111664	107
TCONS_00002107	j	ENSSSCT00000040622	AQR	1:136121110-136129948	4452
TCONS_00002108	j	ENSSSCT00000040622	AQR	1:136121110-136172535	3556
TCONS_00002109	=	ENSSSCT00000040622	AQR	1:136121110-136236356	7157
TCONS_00002110	j	ENSSSCT00000040622	AQR	1:136121110-136243591	18150
TCONS_00002111	j	ENSSSCT00000040622	AQR	1:136121110-136243591	16752
TCONS_00002113	j	ENSSSCT00000040622	AQR	1:136122387-136129948	5907
TCONS_00002114	j	ENSSSCT00000040622	AQR	1:136122387-136243591	15647
TCONS_00002115	=	ENSSSCT00000005298	ZNF770	1:136122719-136129840	5354
TCONS_00002116	=	ENSSSCT00000005301	AQR	1:136136086-136233846	4700
TCONS_00002117	j	ENSSSCT00000040622	AQR	1:136179164-136243591	12728
TCONS_00002118	j	ENSSSCT00000040622	AQR	1:136225555-136243591	11293
TCONS_00002119	=	ENSSSCT00000005302	ACTC1	1:136281118-136286631	1639
TCONS_00002120	=	ENSSSCT00000058944	ACTC1	1:136281276-136286631	2027
TCONS_00002121	=	ENSSSCT00000040219	GJD2	1:136323802-136329188	4396
TCONS_00002122	=	ENSSSCT00000005305	ENSSSCG00000004806	1:136497447-136522347	4747
TCONS_00002123	j	ENSSSCT00000005306	SCG5	1:136525960-136590965	2185
TCONS_00002124	=	ENSSSCT00000005306	SCG5	1:136525960-136590965	2182
TCONS_00002125	=	ENSSSCT00000061482	SCG5	1:136525964-136590965	2127
[truncated: 131,160 more rows]

## Sheet: C
Annotated transcript abundance identified across six libraries
Tracking_id	Gene_id	Gene_short_name	Locus	Length	NS_1_Clean_FPKM	NS_2_Clean_FPKM	NS_3_Clean_FPKM	HS_1_Clean_FPKM	HS_2_Clean_FPKM	HS_3_Clean_FPKM
ENSSSCT00000000003	ENSSSCG00000000002	GTSE1	5:3227813-3246243	2608	3.41901e-23	0.0410336	0.103295	0.0981571	0.0467961	0.103752
ENSSSCT00000000004	ENSSSCG00000000003	TTC38	5:3245882-3270814	4789	2.96149	6.15463	6.30024	4.61325	5.25781	5.11316
ENSSSCT00000000006	ENSSSCG00000000005	CDPF1	5:3287461-3294638	862	1.2977	1.93773	1.67943	1.6841	1.35652	1.54928
ENSSSCT00000000007	ENSSSCG00000000006	PPARA	5:3302754-3321091	1406	2.70913	2.8454	2.45909	2.73731	2.77705	2.68928
ENSSSCT00000000008	ENSSSCG00000000007	TRMU	5:3208117-3224366	1628	1.11992	1.08692	0.750413	1.42437	1.66444	1.50385
ENSSSCT00000000011	ENSSSCG00000000010	FBLN1	5:3838210-3927217	4222	1.32835	2.80585	2.45203	5.32149	5.63147	5.18149
ENSSSCT00000000015	ENSSSCG00000000014	FAM118A	5:4070702-4101291	2438	1.16861	1.42213	1.1333	1.97497	2.11976	2.37174
ENSSSCT00000000019	ENSSSCG00000000018	KIAA0930	5:4179662-4191378	2549	1.3069	3.62286	3.54669	3.24336	3.36208	3.42569
ENSSSCT00000000020	ENSSSCG00000000019	NUP50	5:4197550-4219415	5467	5.2444	7.46171	4.74956	6.06356	6.87271	6.52869
ENSSSCT00000000021	ENSSSCG00000000020	PHF21B	5:4291398-4385246	1443	0.0768196	0.117581	0.0897695	0.01704	0.0823455	0.054033
ENSSSCT00000000022	ENSSSCG00000000021	-	5:4399871-4435341	1459	0.280529	0.495136	8.58028e-06	0.239603	0.135779	0.297132
ENSSSCT00000000023	ENSSSCG00000000022	RTL6	5:4649977-4650697	720	2.15345	4.41303	2.64721	5.08644	6.09856	5.54146
ENSSSCT00000000024	ENSSSCG00000039522	SHISAL1	5:4704762-4843481	1352	2.41865e-30	5.78508e-32	0	1.76142e-222	4.10968e-09	1.00953e-77
ENSSSCT00000000025	ENSSSCG00000000024	PARVB	5:4909648-5015339	1053	0.165488	0.479121	0.335963	0.612505	0.651212	0.750982
ENSSSCT00000000026	ENSSSCG00000000025	PARVG	5:4873307-4898706	2549	0.355114	0.41743	0.519452	0.615622	0.727259	0.6566
ENSSSCT00000000027	ENSSSCG00000000026	SULT4A1	5:5131161-5157857	3278	0	0.0080529	0	0.0140091	0	0.00740387
ENSSSCT00000000029	ENSSSCG00000000028	-	5:5375713-5408124	1497	0.0737197	0.0940181	0.137806	0.196207	0.0592604	0.120977
ENSSSCT00000000030	ENSSSCG00000000029	SCUBE1	5:5561605-5686841	3033	0	7.85623e-05	7.46082e-05	6.95152e-05	0.0180837	1.62301e-06
ENSSSCT00000000033	ENSSSCG00000000031	MCAT	5:5742161-5751692	1617	1.84927	1.99254	1.59815	0.691427	0.730866	0.583109
ENSSSCT00000000035	ENSSSCG00000000033	TSPO	5:5723189-5735131	833	14.9022	10.0285	22.0103	15.4477	9.82748	11.4539
ENSSSCT00000000036	ENSSSCG00000000034	TTLL12	5:5701531-5718999	3213	5.27296	10.7248	6.81128	14.6867	10.6385	12.5901
ENSSSCT00000000037	ENSSSCG00000000035	TTLL1	5:5793780-5827632	1681	0.24393	0.491652	0.454513	1.47943	0.521856	1.56561
ENSSSCT00000000038	ENSSSCG00000000036	PACSIN2	5:5899216-5985173	3255	3.71649	3.00786	3.99898	3.00046	5.12219	4.201
ENSSSCT00000000039	ENSSSCG00000000037	ARFGAP3	5:5994175-6050539	2715	9.6857	7.97754	10.1656	7.3855	10.2444	9.07473
ENSSSCT00000000040	ENSSSCG00000000038	CYB5R3	5:6152921-6169262	903	5.50136	7.81301	5.92443	5.62706	7.51058	6.38351
ENSSSCT00000000041	ENSSSCG00000000039	POLDIP3	5:6174558-6202081	3533	10.1993	14.1446	11.2248	14.6584	14.0904	14.5149
ENSSSCT00000000042	ENSSSCG00000000040	2019-09-03	5:6623313-6654438	1608	8.42904e-07	6.97262e-08	1.3741e-07	0.0228735	2.15955e-06	3.36618e-06
ENSSSCT00000000043	ENSSSCG00000000040	2019-09-03	5:6604282-6623402	1032	0	0.0865938	0.0264696	0.0501834	0.0303153	0
ENSSSCT00000000046	ENSSSCG00000000050	NAGA	5:6571004-6588054	2353	2.41885	5.05231	5.1538	3.95721	1.62414	2.78905
ENSSSCT00000000048	ENSSSCG00000020945	SMDT1	5:6568079-6571275	993	6.06085	7.46453	6.6521	4.99122	5.36382	5.24778
ENSSSCT00000000049	ENSSSCG00000000045	NDUFA6	5:6562050-6567647	1229	7.46667	8.44751	7.09539	6.99669	8.72492	7.78458
ENSSSCT00000000051	ENSSSCG00000000046	CYP2D25	5:6538906-6543746	1858	1.84332	3.25578	1.43648	3.28183	6.39025	4.51634
ENSSSCT00000000055	ENSSSCG00000000050	NAGA	5:6580140-6587550	1235	15.9618	22.5738	21.5948	24.0618	20.3644	21.8731
ENSSSCT00000000064	ENSSSCG00000000058	SNU13	5:6891001-6900026	1468	13.3036	19.4375	16.9509	16.1161	18.864	18.5163
ENSSSCT00000000065	ENSSSCG00000000059	XRCC6	5:6900963-6929220	4949	0.455658	0.480454	0.0946635	0.103171	0.0908565	0.123589
ENSSSCT00000000067	ENSSSCG00000000061	PMM1	5:6964998-6975904	1532	12.177	20.7049	18.1022	11.9496	15.3797	13.1358
ENSSSCT00000000068	ENSSSCG00000000062	CSDC2	5:6976276-6988352	2203	0.289554	0.245926	0.292683	0.299439	0.413423	0.32781
ENSSSCT00000000069	ENSSSCG00000000063	POLR3H	5:6999980-7014430	2669	0.421317	0.523464	0.714686	0.662948	0.802791	0.664777
ENSSSCT00000000070	ENSSSCG00000000064	ACO2	5:7014382-7071023	2666	18.0602	24.2027	22.2438	27.536	24.9779	26.5719
ENSSSCT00000000072	ENSSSCG00000000066	L3MBTL2	5:7253384-7277678	7289	0.80246	1.56298	1.09474	1.90479	1.75722	1.80946
ENSSSCT00000000073	ENSSSCG00000000067	CHADL	5:7248449-7252936	2214	0.0239057	0.048829	0.0111211	0.0637405	0.166956	0.0673757
ENSSSCT00000000074	ENSSSCG00000000068	EP300	5:7312261-7373440	7206	1.28628e-05	0.203936	2.63772e-05	0.0739161	1.95841e-05	0.0801957
ENSSSCT00000000077	ENSSSCG00000000071	-	5:7583047-7616382	2216	27.096	35.9583	32.5456	30.5829	38.1042	34.2646
ENSSSCT00000000078	ENSSSCG00000000072	SLC25A17	5:7622693-7670281	1877	1.88258	2.11846	2.04392	1.82249	1.16391	1.57857
ENSSSCT00000000079	ENSSSCG00000000073	-	5:7673982-7675196	378	0.11251	0.233254	0	0	0.855495	0.534291
ENSSSCT00000000080	ENSSSCG00000000074	MCHR1	5:7735821-7737597	1585	0	0.0040838	0	0	0.0117205	0.00696437
ENSSSCT00000000081	ENSSSCG00000000075	MKL1	5:7874346-7975925	4518	0.170025	0.198518	0.0988593	0.162774	0.150318	0.161772
ENSSSCT00000000082	ENSSSCG00000000076	SGSM3	5:7976098-8017770	2880	4.98137	6.45026	5.67713	5.9906	7.0446	6.67713
ENSSSCT00000000083	ENSSSCG00000000077	ADSL	5:8027587-8045528	1732	4.70306	5.91534	5.40278	5.17188	6.58408	5.84872
ENSSSCT00000000084	ENSSSCG00000000078	TNRC6B	5:8064531-8175663	5379	0.150431	7.65496e-05	0.189241	0.33121	0.576262	0.463701
ENSSSCT00000000085	ENSSSCG00000000079	FAM83F	5:8320977-8354723	6022	3.46601	3.15115	2.89814	5.83629	3.64893	4.6691
ENSSSCT00000000086	ENSSSCG00000000080	GRAP2	5:8375925-8417248	2040	0.080398	0.16536	0.0665625	0.0440307	0.0383988	0.0212644
ENSSSCT00000000087	ENSSSCG00000000081	-	5:8534266-8553015	1417	0	0	0	0.017393	0	0
ENSSSCT00000000088	ENSSSCG00000000082	CACNA1I	5:8597052-8701228	6451	0.0195977	0.0837765	0.0547365	0.152699	0.259927	0.183415
ENSSSCT00000000089	ENSSSCG00000000083	RPS19BP1	5:8735381-8738817	827	6.4593	8.61274	9.8816	9.52042	8.13136	8.05009
ENSSSCT00000000090	ENSSSCG00000000084	ATF4	5:8742966-8745368	1734	66.825	55.5879	48.6373	47.2356	55.4308	51.422
ENSSSCT00000000093	ENSSSCG00000000087	TAB1	5:8824674-8852850	6447	1.59613	1.42509	1.94985	1.48239	1.69472	1.53444
ENSSSCT00000000095	ENSSSCG00000000089	-	5:8923673-8927953	768	21.8215	25.2483	19.0718	22.0841	20.1975	21.4378
ENSSSCT00000000096	ENSSSCG00000000090	CBX7	5:9070352-9087634	1099	0.708258	0.964749	1.26535	1.02507	0.956993	1.05885
ENSSSCT00000000097	ENSSSCG00000000091	APOBEC3B	5:9094802-9116450	5922	0.145065	0.191561	0.116622	0.173788	0.0968434	0.199717
ENSSSCT00000000098	ENSSSCG00000000092	NPTXR	5:9207670-9230351	5431	0.0280671	0.0380942	0.0130679	0.045565	0.045036	0.039406
ENSSSCT00000000099	ENSSSCG00000000093	DNAL4	5:9236624-9248726	1421	0.823974	1.53567	1.29406	1.8595	1.89195	2.01579
ENSSSCT00000000100	ENSSSCG00000000094	SUN2	5:9273227-9293255	3934	9.54609	13.1568	10.4091	13.5341	9.31816	11.4452
ENSSSCT00000000101	ENSSSCG00000000095	GTPBP1	5:9295400-9322171	3999	0.704107	1.80437	1.08039	1.34202	1.66704	1.62642
ENSSSCT00000000102	ENSSSCG00000039555	JOSD1	5:9322627-9332221	1445	0.354963	0.656304	0.423987	0.408872	0.902778	0.605847
ENSSSCT00000000103	ENSSSCG00000000097	-	5:9336128-9358142	1849	15.5985	22.5699	19.4961	17.5318	18.6634	17.2865
ENSSSCT00000000109	ENSSSCG00000000103	DMC1	5:9433057-9470549	2257	0	0	0.0219328	0.0104186	0.0251728	0.0220248
ENSSSCT00000000110	ENSSSCG00000000104	DDX17	5:9486028-9503052	2319	26.3423	46.1528	39.8587	44.8175	45.5791	45.4504
ENSSSCT00000000111	ENSSSCG00000000105	KDELR3	5:9505156-9515734	1744	5.94323	6.60028	4.94032	5.25682	6.18408	5.7606
ENSSSCT00000000112	ENSSSCG00000000106	KCNJ4	5:9547176-9548520	1344	0	0	0	0.0184674	0	0.0195197
ENSSSCT00000000113	ENSSSCG00000000107	-	5:9594986-9615759	2871	1.92613	3.2959	1.22444	3.41126	2.25976	2.77042
ENSSSCT00000000114	ENSSSCG00000000108	TMEM184B	5:9633554-9682473	3949	0.0468441	0.00013755	0.000108446	0.201884	0.222166	0.085663
ENSSSCT00000000116	ENSSSCG00000000110	PLA2G6	5:9724035-9777260	2421	0.185611	0.47889	0.39094	0.39495	0.511142	0.102968
ENSSSCT00000000117	ENSSSCG00000000111	BAIAP2L2	5:9778726-9799703	2100	0.406557	0.310804	0.391262	0.495557	0.625886	0.523803
ENSSSCT00000000119	ENSSSCG00000000113	SLC16A8	5:9801758-9806321	1446	0	0	0.0178251	0	0	0
ENSSSCT00000000120	ENSSSCG00000000114	PICK1	5:9808450-9826322	2839	1.76022	1.23107	2.82307	1.08671	1.24061	1.04529
ENSSSCT00000000121	ENSSSCG00000039315	SOX10	5:9892245-9905569	1686	2.53925e-05	4.42215e-05	1.55251e-05	2.44535e-05	0.244502	0.209671
ENSSSCT00000000122	ENSSSCG00000000116	POLR2F	5:9904947-9917744	1021	9.66848	12.6878	14.531	10.0636	12.3736	10.9861
ENSSSCT00000000123	ENSSSCG00000000117	C22orf23	5:9917750-9925634	2506	0.11558	0.331892	0.176395	0.419027	0.292479	0.344488
ENSSSCT00000000124	ENSSSCG00000000118	MICALL1	5:9927319-9956827	2574	0.490146	0.728291	0.476151	1.11305	1.10413	1.13823
ENSSSCT00000000125	ENSSSCG00000000119	EIF3L	5:9970016-9996024	1803	34.5196	47.9518	40.7598	42.4224	47.0712	44.7597
ENSSSCT00000000126	ENSSSCG00000000120	ANKRD54	5:10003835-10018944	3306	1.26557	1.40468	1.19411	1.34678	1.39216	1.34284
ENSSSCT00000000127	ENSSSCG00000000121	GALR3	5:10024347-10026101	1131	0	0	0	0	0.027217	0
ENSSSCT00000000128	ENSSSCG00000029945	GCAT	5:10031224-10038476	1468	4.31394	2.44113	2.32443	1.51259	1.51441	1.51929
ENSSSCT00000000136	ENSSSCG00000000130	CYTH4	5:10489288-10521735	3250	1.03718	1.20264	1.50951	1.6822	1.65649	1.5465
ENSSSCT00000000137	ENSSSCG00000000131	ELFN2	5:10427018-10429478	2460	0.0214346	0.0109206	0.0299886	0.00949813	0.057372	0.0200791
ENSSSCT00000000139	ENSSSCG00000000133	TST	5:10749466-10759619	1229	10.4221	11.5204	14.25	8.88976	8.88192	8.938
ENSSSCT00000000141	ENSSSCG00000000135	KCTD17	5:10707353-10718983	1525	0.0902609	0.221005	0.101226	0.256235	0.154781	0.270837
ENSSSCT00000000142	ENSSSCG00000000136	CSF2RB	5:10814007-10840808	7775	0.372389	0.497616	0.394858	0.837122	0.540264	0.651518
ENSSSCT00000000145	ENSSSCG00000000139	IFT27	5:11000411-11015327	570	0.359884	1.10923	0.567001	1.60554	1.00239	1.24439
ENSSSCT00000000147	ENSSSCG00000000141	EIF3D	5:11213280-11233149	6288	8.09181	12.647	10.7817	9.76198	11.3796	10.6311
ENSSSCT00000000148	ENSSSCG00000000142	FOXRED2	5:11233844-11254712	6416	0.106251	0.35918	0.15734	0.405766	0.528182	0.429082
ENSSSCT00000000150	ENSSSCG00000000144	-	5:11264464-11277631	1420	10.25	18.0595	18.8283	17.189	14.8478	16.3545
ENSSSCT00000000151	ENSSSCG00000000145	MYH9	5:11398165-11455054	5880	18.701	46.6518	28.0107	56.5351	47.6019	52.422
ENSSSCT00000000153	ENSSSCG00000000146	-	3:7002732-7132492	5236	10.7856	19.4894	13.392	24.5684	18.8898	22.1635
ENSSSCT00000000156	ENSSSCG00000000148	-	5:11509985-11543032	3962	0.427205	0.646269	0.417699	0.521471	0.406055	0.51848
ENSSSCT00000000159	ENSSSCG00000000151	-	5:11920385-11929669	1881	3.5225e-07	0.0583779	0.0534572	0.050768	0	0.0133973
ENSSSCT00000000160	ENSSSCG00000000152	RBFOX2	5:11696933-11899864	1340	3.65566	2.99672	3.87842	2.6976	2.96501	2.82791
ENSSSCT00000000164	ENSSSCG00000000156	FBXO7	5:12505646-12525727	1765	4.02256	6.12938	4.105	4.71672	5.53349	5.12967
ENSSSCT00000000165	ENSSSCG00000000157	BPIFC	5:12535678-12579900	4455	0.0133186	9.13478e-06	2.72762e-06	0.0665637	9.18177e-05	0.0486045
ENSSSCT00000000167	ENSSSCG00000000158	RTCB	5:12579974-12607578	3895	2.98364	4.86641	3.68384	5.04576	4.66168	5.02441
ENSSSCT00000000169	ENSSSCG00000000160	PRDM4	5:12638388-12668879	4124	1.64755	2.29184	1.52325	2.28577	2.24197	2.16547
ENSSSCT00000000170	ENSSSCG00000000161	PWP1	5:12703303-12730726	1488	4.76854	5.14931	4.0062	4.14429	3.72823	4.24488
ENSSSCT00000000171	ENSSSCG00000000162	BTBD11	5:12754538-13069527	5905	3.84125	2.39667	2.94568	1.64329	1.71538	1.85736
ENSSSCT00000000173	ENSSSCG00000000164	CRY1	5:13275543-13364591	2892	0.135674	0.465041	0.265495	1.08056	0.270668	0.565689
ENSSSCT00000000176	ENSSSCG00000000167	RIC8B	5:13472297-13580562	2209	5.38127e-07	2.80041e-06	3.43464e-06	1.27382e-05	3.54396e-06	1.30566e-05
ENSSSCT00000000177	ENSSSCG00000000169	POLR3B	5:13590157-13758140	4228	0.0816357	0.249804	0.0191585	0.136754	0.178196	0.144553
ENSSSCT00000000178	ENSSSCG00000000169	POLR3B	5:13732002-13926539	3273	2.7522	3.19828	2.86434	2.15181	2.74607	2.38018
ENSSSCT00000000180	ENSSSCG00000000171	CKAP4	5:14021320-14030039	1778	3.65556	7.57964	3.01549	16.5327	10.4108	13.3489
ENSSSCT00000000184	ENSSSCG00000000175	ADCY6	5:14836797-14850728	3441	5.93985	5.7317	5.37084	6.13049	5.06595	5.6005
ENSSSCT00000000185	ENSSSCG00000000176	DDX23	5:14886693-14909741	5554	3.13584	4.31345	3.66489	5.45236	3.96566	4.59517
ENSSSCT00000000188	ENSSSCG00000000179	CCDC65	5:14950491-14959327	2158	0.135699	0.150884	0.184181	0.131224	0.17174	0.138704
ENSSSCT00000000189	ENSSSCG00000000180	FKBP11	5:14958781-14970752	1244	14.7042	7.70379	10.0166	7.42422	9.04265	7.63399
ENSSSCT00000000191	ENSSSCG00000000182	WNT10B	5:14997380-15013613	4839	0.0462463	0.0564018	0.133882	0.115885	0.148489	0.121705
ENSSSCT00000000192	ENSSSCG00000000183	WNT1	5:15012892-15014019	621	0.053362	0	0.050352	0.0475691	0	0
ENSSSCT00000000194	ENSSSCG00000000184	DDN	5:15027080-15029652	2165	0.0983461	0.0751782	0.206478	0.0871771	0.0526585	0.0691096
ENSSSCT00000000195	ENSSSCG00000000185	-	5:15033051-15049656	1705	6.44963	7.86793	7.96628	6.53635	7.26878	6.76247
ENSSSCT00000000197	ENSSSCG00000000186	RHEBL1	5:15093608-15097764	1997	0.107334	0.0957419	0.0876623	0.118949	0.158071	0.125729
ENSSSCT00000000199	ENSSSCG00000000188	DHH	5:15114526-15119577	1855	0.0290801	0	0.0271515	0.0128927	0.0155756	0
ENSSSCT00000000200	ENSSSCG00000000189	LMBR1L	5:15121554-15135252	2142	6.82979	8.66988	5.95973	7.36878	7.04474	7.34483
ENSSSCT00000000201	ENSSSCG00000000190	TUBA1B	5:15186065-15190062	1904	33.0891	120.784	27.8824	122.818	63.0574	79.6956
ENSSSCT00000000203	ENSSSCG00000000190	TUBA1B	5:15150223-15153620	1644	41.799	92.7428	36.6529	113.705	77.7007	82.2985
ENSSSCT00000000204	ENSSSCG00000035856	-	5:15049829-15070225	11456	0.87295	1.70409	1.29253	3.29422	2.9057	3.08915
ENSSSCT00000000207	ENSSSCG00000000194	TUBA1C	5:15260841-15270100	1970	13.9508	62.3055	20.0688	88.1934	50.7044	71.7783
ENSSSCT00000000208	ENSSSCG00000000195	PRPH	5:15285251-15289524	2569	0.0204624	0.396181	0.171771	0.207052	0.219093	0.153357
ENSSSCT00000000210	ENSSSCG00000000197	C1QL4	5:15308281-15312520	2222	0.0239073	0.0121829	0.0111531	0.0211912	0.0128003	0.0111995
ENSSSCT00000000211	ENSSSCG00000000198	DNAJC22	5:15322507-15335076	1743	0.0311293	0	0.0145396	0.0276064	0.0166725	0.014587
ENSSSCT00000000212	ENSSSCG00000000199	-	5:15347632-15484756	2919	9.28302e-06	0.23518	0.167243	0.10722	0.111982	0.120369
ENSSSCT00000000215	ENSSSCG00000000202	MCRS1	5:15517032-15526523	2267	1.92578	3.58138	2.01574	3.80739	2.86716	3.88371
ENSSSCT00000000216	ENSSSCG00000000203	KCNH3	5:15495901-15517020	4383	1.82204e-18	8.68071e-06	7.58216e-06	6.5266e-06	3.32964e-15	9.91113e-16
ENSSSCT00000000217	ENSSSCG00000000204	PRPF40B	5:15570480-15592383	3250	0.485711	0.734002	0.673462	0.945335	1.06943	1.05219
ENSSSCT00000000218	ENSSSCG00000000205	FAM186B	5:15542245-15560066	3153	0.148262	0.234907	0.191936	0.094865	0.273282	0.154266
ENSSSCT00000000219	ENSSSCG00000000206	FAIM2	5:15779333-15813034	4939	0.0980269	0.152317	0.192198	0.201032	0.176621	0.178688
ENSSSCT00000000220	ENSSSCG00000000207	-	5:15774937-15775449	489	0.522853	0.230793	0.177236	0.667791	0.295907	0.399943
ENSSSCT00000000223	ENSSSCG00000000209	NCKAP5L	5:15711253-15761537	5006	0.0984496	0.0489717	0.0883675	0.0930353	0.284168	0.114368
ENSSSCT00000000226	ENSSSCG00000000211	AQP5	5:15876400-15881332	2727	5.50257	5.61568	4.22641	1.68485	2.61108	2.16766
ENSSSCT00000000227	ENSSSCG00000000212	AQP6	5:15887946-15892148	2531	0	0	0.00969617	0	0	0
ENSSSCT00000000229	ENSSSCG00000000214	GPD1	5:16008484-16014419	1495	1.78815e-17	1.71427e-25	4.02784e-41	5.82779e-13	4.30677e-17	6.93122e-11
ENSSSCT00000000230	ENSSSCG00000000215	SMARCD1	5:15992764-16005710	3123	0.475248	1.11895	0.309579	1.11513	0.740379	1.03431
ENSSSCT00000000232	ENSSSCG00000000216	ASIC1	5:15965059-15991876	3794	0.00678438	0	0	0.0194304	0.00782402	0.0136892
ENSSSCT00000000233	ENSSSCG00000000217	-	5:15904676-15943608	2888	2.1714e-05	0.00015041	0.124662	0.115004	4.93703e-05	0.118723
ENSSSCT00000000235	ENSSSCG00000028516	LARP4	5:16284948-16353555	6662	0.814639	0.7115	0.561723	1.05189	0.694226	0.747878
ENSSSCT00000000236	ENSSSCG00000000220	-	AEMK02000258.1:188923-217951	5024	0.0845314	0.160278	0.084697	0.154944	0.239635	0.126856
ENSSSCT00000000240	ENSSSCG00000000223	BIN2	AEMK02000258.1:93258-133285	2182	0.814648	0.468736	0.879998	1.52289	0.243425	0.780106
ENSSSCT00000000245	ENSSSCG00000000228	SCN8A	5:16977702-17168445	6001	1.18216e-07	4.14958e-08	6.15505e-08	9.4979e-08	5.40011e-08	1.17814e-07
ENSSSCT00000000250	ENSSSCG00000000231	ANKRD33	5:17248663-17250938	984	0	5.67599e-06	0	0	0	0
ENSSSCT00000000251	ENSSSCG00000000232	ACVRL1	5:17267930-17285874	5873	0.170437	0.320765	0.170937	0.174137	0.196418	0.196391
ENSSSCT00000000252	ENSSSCG00000000233	ACVR1B	5:17314275-17350723	4536	1.1325	2.02492	1.38022	2.01592	2.18213	2.17304
ENSSSCT00000000253	ENSSSCG00000000234	GRASP	5:17358041-17367324	3325	0.132419	0.499792	0.370234	0.269118	0.183395	0.218815
ENSSSCT00000000255	ENSSSCG00000000236	KRT75	5:17749943-17760524	1626	0	0	9.04533e-05	0	0	0
ENSSSCT00000000264	ENSSSCG00000000245	-	5:17782926-17835092	950	0.292794	0.734237	0.117432	0.747044	0.363721	0.596435
ENSSSCT00000000267	ENSSSCG00000000248	KRT5	5:17860773-17868244	3430	8.86103	16.0462	11.2286	16.5532	13.1353	13.91
ENSSSCT00000000271	ENSSSCG00000000252	KRT8	5:18170353-18180215	3446	0.198715	0.427773	0.132668	0.309133	0.342928	0.310726
ENSSSCT00000000272	ENSSSCG00000000253	KRT18	5:18217574-18222833	2949	12.9492	26.2462	13.934	28.7181	27.5383	28.2509
ENSSSCT00000000273	ENSSSCG00000000263	TNS2	5:18306452-18320270	4053	4.03659e-05	0.143574	2.1198e-05	0.971579	0.188346	0.501625
ENSSSCT00000000276	ENSSSCG00000000257	ITGB7	5:18419438-18434340	2852	0.808929	0.0332241	1.88977e-14	0.232891	0.25609	0.171858
ENSSSCT00000000277	ENSSSCG00000000258	RARG	5:18436730-18447618	2962	0.0494278	0.540717	0.208711	0.473149	0.501701	0.436132
ENSSSCT00000000278	ENSSSCG00000000259	CSAD	5:18379346-18409958	2583	1.56979e-06	5.03111e-09	5.97128e-11	7.12091e-06	0.213007	0.179868
ENSSSCT00000000279	ENSSSCG00000000260	SOAT2	5:18358672-18371264	2227	0	0.0364599	0	0.0317097	0	0.00561523
ENSSSCT00000000280	ENSSSCG00000000261	IGFBP6	5:18353170-18357225	1193	3.7679	4.3592	1.74113	7.72802	2.96726	5.12479
ENSSSCT00000000281	ENSSSCG00000000262	SPRYD3	5:18293253-18338662	2633	3.73625	5.65162	3.51038	4.89157	5.56339	5.26589
ENSSSCT00000000282	ENSSSCG00000000263	TNS2	5:18306452-18320270	4209	1.69276	2.78523	3.32117	3.95742	4.03092	3.8701
ENSSSCT00000000283	ENSSSCG00000000264	MFSD5	5:18476623-18478737	1741	0.000174764	0.000113872	0.134167	0.530281	0.197743	0.29442
ENSSSCT00000000284	ENSSSCG00000000265	ESPL1	5:18487562-18509753	6300	0.132525	0.0245251	0.0523449	0.131565	0.0472506	0.0939635
ENSSSCT00000000286	ENSSSCG00000000267	C12orf10	5:18512709-18525879	2042	8.15254	9.30567	8.60851	7.88514	8.65196	7.98659
ENSSSCT00000000287	ENSSSCG00000000268	AAAS	5:18521627-18537864	6505	0.823871	1.26572	1.1252	1.26968	1.48393	1.4621
ENSSSCT00000000290	ENSSSCG00000000271	AMHR2	5:18642822-18648848	1730	0.0470904	0.0640312	0.0733019	0.125286	0.0672702	0.117712
ENSSSCT00000000291	ENSSSCG00000000272	SP1	5:18589474-18629716	2731	3.20298	2.59694	2.77458	2.55269	3.19864	3.29776
ENSSSCT00000000292	ENSSSCG00000000273	-	5:18660683-18665925	1383	12.2489	7.6691	12.3016	7.66942	7.49459	7.53957
ENSSSCT00000000294	ENSSSCG00000000274	PCBP2	5:18676627-18698895	1062	13.6923	22.1743	21.7296	32.3434	31.8309	32.1429
ENSSSCT00000000295	ENSSSCG00000000275	MAP3K12	5:18699384-18717199	4247	1.74445e-254	0.0375063	5.72231e-218	0.00773925	0.0274006	0.00808741
ENSSSCT00000000296	ENSSSCG00000000276	TARBP2	5:18719032-18723839	1493	2.04232	2.32631	1.54606	1.84264	1.99899	2.09186
ENSSSCT00000000298	ENSSSCG00000000277	NPFF	5:18724163-18724826	348	0.130338	0.542063	0.251242	0.469662	0.283863	0.372264
ENSSSCT00000000299	ENSSSCG00000000278	-	5:18728698-18838547	6595	0.715658	0.000115246	0.498299	0.482858	0.485045	0.501208
ENSSSCT00000000300	ENSSSCG00000000279	HOXC13	5:19151168-19157645	987	0.0297793	0.182645	0.055839	0.158764	0.447573	0.195776
ENSSSCT00000000309	ENSSSCG00000000288	-	5:19484612-19494938	5465	1.36971	2.44451	1.60431	2.69187	2.50847	2.68664
ENSSSCT00000000310	ENSSSCG00000000289	NFE2	5:19494676-19497747	1674	0.0239464	7.48803e-25	5.87514e-84	0.14022	1.06017e-05	0.199234
ENSSSCT00000000311	ENSSSCG00000000290	COPZ1	5:19522612-19542372	2001	17.2737	19.8428	20.4427	17.8977	17.2175	17.0342
ENSSSCT00000000312	ENSSSCG00000000291	GPR84	5:19552812-19554796	1528	0.144101	0.11026	0.0336677	1.0866	0.559847	0.844506
ENSSSCT00000000313	ENSSSCG00000000292	ZNF385A	5:19560318-19577120	2378	7.7979e-06	1.1171e-06	0.000164202	0.00015634	1.91085e-05	0.000162926
ENSSSCT00000000314	ENSSSCG00000000293	ITGA5	5:19583450-19611209	9021	0.690155	1.2064	0.818465	1.34021	1.23806	1.26299
ENSSSCT00000000316	ENSSSCG00000000295	NCKAP1L	5:19677874-19720547	4697	1.15812	1.38135	0.954741	1.08612	1.62746	1.55195
ENSSSCT00000000318	ENSSSCG00000000297	PDE1B	5:19725353-19752890	3156	8.60392e-06	0.777531	0.133145	0.251042	0.3584	0.236954
ENSSSCT00000000319	ENSSSCG00000000298	PPP1R1A	5:19753856-19763269	805	0.0381669	0	0	0.0679052	0.041023	0.0717723
ENSSSCT00000000320	ENSSSCG00000000299	TESPA1	5:19982880-20017425	1835	0.151192	0.337034	6.35772e-05	0.370891	1.19203e-05	0.232361
ENSSSCT00000000326	ENSSSCG00000031260	-	5:20198539-20199472	933	0	0.0325754	0	0	0	0
ENSSSCT00000000332	ENSSSCG00000035492	-	5:20247725-20248670	945	0	0	0	0	0.0336851	0.0294685
ENSSSCT00000000333	ENSSSCG00000000312	-	5:20275504-20276476	972	0	0	0.0142194	0	0.0325618	0.014243
ENSSSCT00000000339	ENSSSCG00000000318	-	AEMK02000577.1:164561-165488	927	0.160527	0	0	0	0	0
ENSSSCT00000000344	ENSSSCG00000033458	-	5:20372615-20373554	939	0.216012	0.0754217	0.009884	0.121748	0	0.0593921
ENSSSCT00000000345	ENSSSCG00000037447	-	5:20663067-20663988	921	0.145611	0.182001	0.0303584	0.0719055	0.0347507	0.0608009
ENSSSCT00000000349	ENSSSCG00000000327	-	5:20534639-20535575	936	0	0.140612	0	0.0564093	0	0.0298112
ENSSSCT00000000352	ENSSSCG00000034512	-	AEMK02000276.1:111314-112265	951	0.280194	0.0318314	0.029199	0.138342	0	0.0584887
ENSSSCT00000000354	ENSSSCG00000000332	-	5:20616741-20617680	939	0.0316115	0.0107745	0	0.0280957	0.101836	0.0890882
ENSSSCT00000000355	ENSSSCG00000000333	-	5:20649766-20650705	939	0.232006	0.161733	0	0.180281	0	0.15343
ENSSSCT00000000360	ENSSSCG00000035932	-	5:21011889-21012828	939	0.063223	0.0161618	0	0	0	0
ENSSSCT00000000371	ENSSSCG00000035206	-	AEMK02000497.1:171359-172295	936	0.0481669	0.0754439	0.0843411	0.105767	0	0.0447168
ENSSSCT00000000374	ENSSSCG00000000352	-	5:20940542-20941470	928	0.0160318	0	0	0.0284993	0	0
ENSSSCT00000000381	ENSSSCG00000000359	-	5:21156856-21160737	558	9.39111	13.4611	15.777	13.7299	13.9259	13.4622
ENSSSCT00000000384	ENSSSCG00000000362	RDH5	5:21166903-21170897	1238	0.0914123	0.0466674	0.0213856	0.060861	0	0.0428859
ENSSSCT00000000386	ENSSSCG00000000363	GDF11	5:21191189-21201804	4387	0.0291644	0.100957	0.0325994	0.0723223	0.0936088	0.0928267
ENSSSCT00000000387	ENSSSCG00000000364	SARNP	5:21206603-21288580	1372	3.8919	4.49038	3.24899	3.66752	2.89372	3.34005
ENSSSCT00000000388	ENSSSCG00000000365	-	5:21262192-21264685	966	26.2579	40.6786	35.3023	29.6614	31.2878	31.1459
ENSSSCT00000000389	ENSSSCG00000000366	DNAJC14	5:21265664-21272646	2114	3.83463	5.33575	4.96746	5.88167	5.78169	6.00417
ENSSSCT00000000390	ENSSSCG00000000367	-	5:21274045-21279335	2345	0.194915	5.60326e-08	0.270054	0.0282091	0.068583	0.0404881
ENSSSCT00000000391	ENSSSCG00000000368	MMP19	5:21278080-21286073	3873	0.841031	0.856625	0.847542	1.12629	0.973384	0.988456
ENSSSCT00000000393	ENSSSCG00000000370	DGKA	5:21336805-21355481	2575	0.182258	1.28571	0.777803	0.88062	1.54898	1.47493
ENSSSCT00000000394	ENSSSCG00000000371	PMEL	5:21355618-21364987	2046	0.0261369	0.026643	0.0365906	0.0926841	0.0419888	0.0979669
ENSSSCT00000000398	ENSSSCG00000000373	CDK2	5:21364386-21371310	3601	0.0178943	2.24896e-179	0.0651514	2.4105e-64	0.0834032	0.0560592
ENSSSCT00000000399	ENSSSCG00000000374	RPS26	5:21431658-21434295	1303	2.20463e-06	1.48467e-05	0.0188452	9.68603e-05	8.73727e-06	4.99111e-06
ENSSSCT00000000402	ENSSSCG00000000376	SUOX	5:21395265-21399719	2148	7.89369	10.7312	10.9397	6.66234	6.39097	6.15768
ENSSSCT00000000403	ENSSSCG00000000377	-	5:21496024-21504095	2539	5.27013	7.9256	6.11764	7.10735	7.64803	7.14202
ENSSSCT00000000405	ENSSSCG00000000379	ESYT1	5:21518069-21534463	3159	6.50706	11.0256	4.49736	4.27813	5.2924	3.9244
ENSSSCT00000000407	ENSSSCG00000039506	-	5:21554350-21558992	1230	0.541644	0.383777	0.376746	0.237899	0.104899	1.15335e-06
ENSSSCT00000000408	ENSSSCG00000039795	MYL6	5:21559298-21562418	696	115.198	234.456	164.81	167.539	141.883	154.836
ENSSSCT00000000409	ENSSSCG00000039795	MYL6	5:21559480-21562417	1475	0.447375	0.482899	0.393072	0.369852	0.310808	0.394098
ENSSSCT00000000410	ENSSSCG00000000382	SMARCC2	5:21563402-21586700	4834	0.206634	0.453457	0.661014	1.21662	0.921184	1.27142
ENSSSCT00000000411	ENSSSCG00000000383	RNF41	5:21596844-21624559	3190	4.40869	5.81919	4.07893	4.99263	4.89057	5.62341
ENSSSCT00000000412	ENSSSCG00000000384	NABP2	5:21624142-21634412	4504	0.415312	0.489143	0.57489	0.512531	0.363619	0.446154
ENSSSCT00000000413	ENSSSCG00000000385	SLC39A5	5:21631963-21637655	2039	4.32604e-242	5.43083e-07	4.94447e-06	4.41116e-25	8.23761e-06	7.2906e-09
ENSSSCT00000000414	ENSSSCG00000000386	ANKRD52	5:21637612-21657092	6877	0.431818	0.418775	0.503544	0.921554	1.02589	1.07337
ENSSSCT00000000419	ENSSSCG00000039506	-	5:21555071-21558988	866	1.06279	0.84472	0.180557	0.755417	0.927375	1.17993
ENSSSCT00000000424	ENSSSCG00000000393	PAN2	5:21712874-21727016	3600	4.50599e-06	7.58087e-06	6.82897e-06	5.80792e-06	1.06739e-05	6.8624e-06
ENSSSCT00000000425	ENSSSCG00000000394	-	5:21707833-21711292	1232	18.8665	14.7802	15.6886	15.559	15.3261	14.6811
ENSSSCT00000000428	ENSSSCG00000000396	STAT2	5:21733029-21751354	5641	10.1937	7.05014	7.72853	7.31286	6.43632	6.79568
ENSSSCT00000000430	ENSSSCG00000000398	APOF	5:21759474-21760815	1202	7.62363e-07	1.17664e-07	0	1.23481e-07	2.44542e-06	1.47336e-06
ENSSSCT00000000431	ENSSSCG00000000399	TIMELESS	5:21759474-21787521	4994	0.117314	0.176545	0.242261	0.338768	0.311025	0.319887
ENSSSCT00000000432	ENSSSCG00000000400	MIP	5:21787825-21793592	2246	0	0.024085	0.0330732	0	0	0
ENSSSCT00000000433	ENSSSCG00000000401	GLS2	5:21806406-21819656	2667	0.032955	0.0426484	0.0275071	0.10957	0.0528772	0.0723848
ENSSSCT00000000434	ENSSSCG00000000402	RBMS2	5:21870849-21927830	1146	1.08817	1.75627	0.000360113	1.01509	0.121794	0.113189
ENSSSCT00000000436	ENSSSCG00000000403	BAZ2A	5:21933280-21982837	8973	0.365079	0.742944	0.366253	0.690321	0.329224	0.358964
ENSSSCT00000000438	ENSSSCG00000000405	-	5:21984753-21992302	1669	56.8773	72.8208	50.5373	65.3122	56.5078	61.1461
ENSSSCT00000000439	ENSSSCG00000000406	PTGES3	5:22000339-22021662	1954	7.19881	15.0142	9.2463	15.8832	16.3925	16.2606
ENSSSCT00000000442	ENSSSCG00000026055	PRIM1	5:22064255-22089390	1550	0.125304	0.444712	0.152864	1.36387e-05	0.184598	0.099678
ENSSSCT00000000443	ENSSSCG00000040435	STAT6	5:22406396-22422398	4057	6.56739	11.5021	8.67718	12.4736	11.5636	11.7121
ENSSSCT00000000445	ENSSSCG00000000411	NAB2	5:22400547-22410479	6380	0.233835	0.113526	0.413005	0.23556	0.425544	0.227842
ENSSSCT00000000446	ENSSSCG00000025542	NEMP1	5:22370689-22390132	2021	0.64895	1.08006	0.50681	1.29155	1.1915	1.31552
ENSSSCT00000000447	ENSSSCG00000000413	MYO1A	5:22337905-22362433	3683	2.34992e-06	1.04529e-07	2.08257e-06	0	2.55299e-06	2.10636e-06
ENSSSCT00000000448	ENSSSCG00000000419	RDH16	5:22251752-22285044	1722	5.85393e-06	0.10437	7.21758e-06	0.711337	4.0765e-05	0.198991
ENSSSCT00000000449	ENSSSCG00000000415	SDR9C7	5:22228041-22244086	1643	0.116319	0.305078	0	0.456894	0.12464	0.280412
ENSSSCT00000000453	ENSSSCG00000000419	RDH16	5:22261961-22282978	1201	1.7811e-102	0.0221181	1.18629e-39	0.0704748	0.0439229	0.0474928
ENSSSCT00000000458	ENSSSCG00000000413	MYO1A	5:22338029-22360018	3156	0.0329114	0	0.015337	0	0.0440305	0.00770306
ENSSSCT00000000460	ENSSSCG00000000411	NAB2	5:22401337-22406420	2269	0.455965	1.08012	0.982414	1.4115	0.936556	1.14698
ENSSSCT00000000461	ENSSSCG00000040435	STAT6	5:22406135-22421630	4281	0.430871	0.447416	1.22754	2.62075	0.465471	1.45156
ENSSSCT00000000464	ENSSSCG00000000444	DCTN2	5:22799439-22814480	1513	13.8405	20.7621	18.9236	17.8157	16.7187	18.379
ENSSSCT00000000465	ENSSSCG00000000431	MBD6	5:22793363-22798234	3006	0.398455	0.405873	0.403737	0.775126	1.04765	0.88421
ENSSSCT00000000467	ENSSSCG00000000433	B4GALNT1	5:22889661-22897206	2525	6.70425e-05	0.0124555	0.165449	9.81124e-05	0.000405562	0.000516036
ENSSSCT00000000470	ENSSSCG00000000435	ARHGEF25	5:22873333-22881570	3464	0.627521	1.19894	0.494386	0.92524	0.801462	0.953602
ENSSSCT00000000471	ENSSSCG00000000436	PIP4K2C	5:22854284-22868453	4308	3.6164	6.45621	4.4771	6.33056	6.05246	6.2218
ENSSSCT00000000472	ENSSSCG00000000437	ARHGAP9	5:22744636-22755159	5485	0.00811232	0.0494072	0.0902544	0.0716134	0.0953017	0.0757648
ENSSSCT00000000473	ENSSSCG00000000437	ARHGAP9	5:22747574-22756137	2441	0.229618	0.148854	0.222437	0.359479	0.193911	0.268454
ENSSSCT00000000474	ENSSSCG00000000439	KIF5A	5:22816876-22851971	5520	0	0.00620646	0.00104672	5.2456e-95	0.0172661	0.011899
ENSSSCT00000000476	ENSSSCG00000000435	ARHGEF25	5:22873333-22881530	3328	0.106149	5.49911e-28	9.45658e-16	0.229746	9.07957e-11	1.11685e-09
ENSSSCT00000000478	ENSSSCG00000000443	GLI1	5:22736954-22748001	4276	0	0.0121979	0	0.0530527	1.1801e-05	0.000254057
ENSSSCT00000000479	ENSSSCG00000000444	DCTN2	5:22799286-22814363	1768	15.2961	21.8116	19.8408	16.5178	16.5424	15.4979
ENSSSCT00000000484	ENSSSCG00000000449	DTX3	5:22869296-22873407	2026	1.53906	2.64481	2.06364	3.27819	2.76383	2.61088
ENSSSCT00000000486	ENSSSCG00000038732	AGAP2	5:23017458-23033395	2427	0.207088	0.163109	0.0988306	0.237851	0.181482	0.0997451
ENSSSCT00000000489	ENSSSCG00000000453	ATP23	5:23233853-23276036	1404	0.534773	1.19255	0.74077	1.37086	0.976717	1.37467
ENSSSCT00000000491	ENSSSCG00000000455	LRIG3	5:24066622-24117971	4082	4.52524	2.79754	3.58468	2.81006	2.37607	2.43033
ENSSSCT00000000492	ENSSSCG00000000456	SLC16A7	5:24749529-24877213	6982	1.94266	5.45461	2.67187	7.10474	5.55752	6.32607
ENSSSCT00000000493	ENSSSCG00000000457	USP15	5:26964787-27083336	5570	4.62277	5.91788	4.02855	4.95775	4.83148	5.09677
ENSSSCT00000000494	ENSSSCG00000000458	MON2	5:27126135-27241716	6736	0.978808	0.270398	0.460269	0.000130445	0.701127	0.000663314
ENSSSCT00000000500	ENSSSCG00000000462	RXYLT1	5:28247411-28276283	1666	2.07814	1.9966	1.97185	1.61068	1.91112	1.85615
ENSSSCT00000000504	ENSSSCG00000000466	XPOT	5:28831988-28851021	2387	0.791752	1.52042	0.564059	1.2767	1.20132	1.32597
ENSSSCT00000000507	ENSSSCG00000000469	LEMD3	5:29595882-29670665	3088	2.48413	2.77889	2.7332	3.20375	3.09358	3.15874
ENSSSCT00000000511	ENSSSCG00000000473	-	5:30488064-30511550	3328	6.49794	8.17138	6.8392	5.14287	6.28781	5.61094
ENSSSCT00000000513	ENSSSCG00000000475	IRAK3	5:30560072-30598954	1572	0.000147065	0.000334118	0.000110544	6.60092e-05	0.000322312	8.60382e-05
ENSSSCT00000000515	ENSSSCG00000000477	HELB	5:30645655-30690734	2838	0.807728	1.74625	1.62365	2.66109	2.36169	2.4154
ENSSSCT00000000516	ENSSSCG00000000478	GRIP1	5:30698585-31020436	3450	0.746747	0.76441	0.431434	0.404123	0.427159	0.262496
ENSSSCT00000000517	ENSSSCG00000028869	CAND1	5:31657500-31699839	8888	1.72569	1.98153	1.46018	1.50332	1.40788	1.37013
ENSSSCT00000000521	ENSSSCG00000000483	-	5:32644708-32673639	2142	0.000118306	0.20538	0.0920863	0.361868	0.230951	0.334723
ENSSSCT00000000524	ENSSSCG00000000486	NUP107	5:32989780-33040561	3184	2.11962	2.72354	2.21879	2.70842	2.40813	2.57272
ENSSSCT00000000525	ENSSSCG00000000487	SLC35E3	5:33049238-33068198	3953	0.195002	0.476547	0.369404	0.529672	0.459035	0.462501
ENSSSCT00000000526	ENSSSCG00000000488	MDM2	5:33105736-33164514	1874	0.00106052	0.0755254	2.06165e-11	1.93567e-09	0.685101	2.53821e-09
ENSSSCT00000000530	ENSSSCG00000000492	LYZ	5:33612592-33618953	1264	9.46175	2.82506	7.82978	4.65495	5.24094	5.10861
ENSSSCT00000000531	ENSSSCG00000000493	FRS2	5:33725465-33848798	1786	1.96431e-19	4.25142e-12	1.66391e-20	2.10296e-20	2.9802e-12	8.77822e-22
ENSSSCT00000000535	ENSSSCG00000000496	CCT2	5:33858638-33875661	3937	14.6218	21.2962	14.7416	16.3275	17.0842	16.7878
ENSSSCT00000000538	ENSSSCG00000000499	BEST3	5:33914946-33956536	3167	0.0924061	0.0998205	0.081203	0.0118496	1.13992e-06	4.9146e-06
ENSSSCT00000000539	ENSSSCG00000000500	-	5:34003188-34053892	1826	3.33436	5.56332	5.76363	2.5905	1.03296	1.69526
ENSSSCT00000000541	ENSSSCG00000000502	CNOT2	5:34498251-34548253	1737	0.720348	1.60633	1.17525	0.00212749	1.36498	0.53188
ENSSSCT00000000543	ENSSSCG00000000504	PTPRB	5:34658539-34758909	9648	0.849329	0.164638	0.197357	0.953851	0.874636	0.716774
ENSSSCT00000000547	ENSSSCG00000000509	ZFC3H1	5:35617265-35671149	6704	0.0821938	0.281708	1.31561e-05	1.54738e-05	0.0945523	8.82279e-11
ENSSSCT00000000548	ENSSSCG00000000509	ZFC3H1	5:35617260-35671191	6973	5.16532	6.51896	5.7267	6.79641	6.81273	6.79251
ENSSSCT00000000549	ENSSSCG00000000510	TMEM19	5:35692337-35717908	2753	0.990011	0.355873	0.000696216	0.190358	7.79169e-05	5.41717e-05
ENSSSCT00000000551	ENSSSCG00000000512	TBC1D15	5:35827472-35907117	3064	2.72603	2.21014	2.06356	2.47415	2.42376	2.57856
ENSSSCT00000000553	ENSSSCG00000021122	TPH2	5:35918568-36015774	1476	0.0187237	0.0191043	0.0525054	0	0	0
ENSSSCT00000000555	ENSSSCG00000000515	TRHDE	5:36274363-36656344	3135	0.0237008	0.0899098	2.19142e-07	0.0548586	0.0637624	0.0710944
ENSSSCT00000000559	ENSSSCG00000000517	CAPS2	5:38578538-38625088	2607	2.46661e-32	0.0255319	2.17524e-34	0.0223226	1.61122e-15	0.0146395
ENSSSCT00000000561	ENSSSCG00000000519	GLIPR1	5:38767157-38813313	3894	0.285605	0.0964528	0.136688	0.192647	3.24289e-06	0.133401
ENSSSCT00000000563	ENSSSCG00000000521	PHLDA1	5:39314594-39315761	1167	5.06374	1.39909	1.48861	3.73593	1.46954	2.89271
ENSSSCT00000000564	ENSSSCG00000000522	NAP1L1	5:39328052-39363711	4549	0.46607	0.545095	0.489632	0.198026	0.555993	0.387102
ENSSSCT00000000565	ENSSSCG00000000523	BBS10	5:39562061-39566329	3838	0.737357	0.825923	0.880607	0.884677	0.939621	0.972768
ENSSSCT00000000566	ENSSSCG00000027503	OSBPL8	5:39572510-39648018	2512	1.08651	0.0012091	1.12103	0.800716	1.51831	1.15254
ENSSSCT00000000570	ENSSSCG00000000528	PKP2	5:41424794-41509779	4943	10.1296	13.8755	8.57925	9.73278	10.8641	10.3649
ENSSSCT00000000571	ENSSSCG00000000529	DNM1L	5:41569850-41635908	5149	0.136996	0.165296	0.00610536	0.00108248	0.181581	0.21559
ENSSSCT00000000572	ENSSSCG00000000530	FGD4	5:41681452-41806431	2592	1.09343	2.07153	0.607216	1.81185	1.63444	1.91454
ENSSSCT00000000573	ENSSSCG00000000531	BICD1	5:41937876-42143695	2986	2.24249e-07	4.19123e-06	3.00433e-06	0.0290338	1.32508e-06	0.0159553
ENSSSCT00000000576	ENSSSCG00000000534	IPO8	5:43099744-43182797	5374	1.60844	1.30366	0.663487	1.96364	1.84075	2.50272
ENSSSCT00000000578	ENSSSCG00000000536	ERGIC2	5:44334179-44385313	5515	2.34362	2.62717	2.65622	2.80535	2.69972	2.73505
ENSSSCT00000000582	ENSSSCG00000000540	OVCH1	5:44228206-44311394	3702	0.0278293	0.0283396	0	0.0493128	0.0223317	0.019539
ENSSSCT00000000584	ENSSSCG00000000541	FAR2	5:44386831-44558993	3672	0.046971	0.0851679	0.0209742	0.0443915	0.0416221	0.0539235
ENSSSCT00000000586	ENSSSCG00000024232	CCDC91	5:45167083-45443134	1236	0.81802	1.50965	0.715639	0.482198	0.378938	0.216257
ENSSSCT00000000588	ENSSSCG00000000545	KLHL42	5:45933927-45954876	3258	2.28832	1.69605	1.91585	2.12827	1.84384	2.02408
ENSSSCT00000000589	ENSSSCG00000000546	MANSC4	5:45955089-45970274	2354	1.73886	1.21191	1.76885	0.787002	1.23819	1.19426
ENSSSCT00000000590	ENSSSCG00000000547	MRPS35	5:45973071-46023094	2588	1.66316	1.81536	1.76057	1.07153	2.07133	1.54085
ENSSSCT00000000592	ENSSSCG00000000549	PPFIBP1	5:46031402-46222850	5123	0.188353	0.191498	0.000962591	0.301003	0.738918	0.226955
ENSSSCT00000000594	ENSSSCG00000000551	ARNTL2	5:46330521-46441444	1758	0.00254085	0.000219086	0.0864066	0.17918	0.103242	0.112005
ENSSSCT00000000595	ENSSSCG00000000552	MED21	5:46730209-46736376	943	11.7309	14.7926	10.6788	11.1807	10.5704	11.079
ENSSSCT00000000596	ENSSSCG00000000553	TM7SF3	5:46740930-46784194	4250	1.0095	1.12194	1.37349	1.80475	1.93301	1.71631
ENSSSCT00000000597	ENSSSCG00000000554	FGFR1OP2	5:46793136-46824064	3927	1.13813	0.72813	0.970395	0.364155	0.764861	0.530544
ENSSSCT00000000598	ENSSSCG00000000555	ITPR2	5:46936380-47388975	7350	11.0562	10.2025	12.1736	4.56293	7.60492	6.08113
ENSSSCT00000000602	ENSSSCG00000000559	RASSF8	5:47733844-47848475	1760	1.38105	1.65504	0.972706	2.04253	2.40732	2.08001
ENSSSCT00000000606	ENSSSCG00000000563	LRMP	5:48649342-48680612	1350	1.5792e-79	2.84938e-22	3.4024e-18	8.39297e-22	4.47193e-42	6.12733e-39
ENSSSCT00000000609	ENSSSCG00000000567	SOX5	5:49757948-50161468	2699	0.386607	0.27689	0.285618	0.257126	0.352993	0.264253
ENSSSCT00000000610	ENSSSCG00000000567	SOX5	5:49749764-50161028	2305	0.542166	0.456804	0.712382	0.439114	0.726412	0.559184
ENSSSCT00000000613	ENSSSCG00000000570	C2CD5	5:51040886-51132282	4226	8.54117e-06	0.167641	2.86792e-06	0.160874	4.58643e-07	2.17345e-05
ENSSSCT00000000614	ENSSSCG00000000571	ABCC9	5:51538159-51669598	4883	0.364839	0.368943	0.410144	0.376734	0.7162	0.0593073
ENSSSCT00000000616	ENSSSCG00000000573	KCNJ8	5:51695973-51707039	5062	0.397361	0.768064	0.580846	0.650317	0.839413	0.82393
ENSSSCT00000000620	ENSSSCG00000000576	-	5:51810966-51831490	1607	36.5282	78.8277	100.724	55.8501	53.6492	54.1272
ENSSSCT00000000621	ENSSSCG00000000577	GYS2	5:51852975-51915075	2170	0	0	0	0.0108699	0	0
ENSSSCT00000000623	ENSSSCG00000000579	GOLT1B	5:51939479-51953314	3010	1.65213	2.05295	1.653	2.41408	2.56453	2.52739
ENSSSCT00000000624	ENSSSCG00000000580	RECQL	5:51953183-51995514	3086	0.879149	1.50116	1.28951	1.45067	1.2538	1.31943
ENSSSCT00000000626	ENSSSCG00000000582	IAPP	5:52046788-52049999	273	3.78016e-06	0	0	0	0	0
ENSSSCT00000000627	ENSSSCG00000000583	PYROXD1	5:51993953-52021439	3971	1.14508	1.69955	1.31392	1.7706	1.59211	1.73224
ENSSSCT00000000629	ENSSSCG00000000584	SLCO1A2	5:52081031-52131762	4968	0.30536	0.0380258	0.0103686	3.62544e-08	0.0119038	8.24185e-05
ENSSSCT00000000632	ENSSSCG00000000587	AEBP2	5:53617357-53691547	4499	1.92089	2.8917	1.62307	2.43511	2.56652	2.67038
ENSSSCT00000000633	ENSSSCG00000000588	PLEKHA5	5:53760822-54016833	4296	2.77832	2.82134	3.86287	2.37659	2.00923	2.07046
ENSSSCT00000000636	ENSSSCG00000000591	PIK3C2G	5:54474621-54849512	5450	4.99207	1.75327	3.34777	1.17717	2.73137	2.13704
ENSSSCT00000000642	ENSSSCG00000036499	LMO3	5:55895126-56116003	754	0	1.87802e-77	4.61702e-20	1.968e-112	0	0
ENSSSCT00000000643	ENSSSCG00000000598	SLC15A5	5:56345870-56429067	1713	0.031737	0	0	0.0281465	0.0170019	0
ENSSSCT00000000644	ENSSSCG00000000599	DERA	5:56590979-56706483	1779	2.06816	4.02092	1.97352	2.7128	2.8197	2.88923
ENSSSCT00000000645	ENSSSCG00000000600	EPS8	5:56898940-57005114	3707	1.26824	1.8847	1.62082	2.49733	2.23779	2.32617
ENSSSCT00000000646	ENSSSCG00000000601	PTPRO	5:57021177-57263405	5352	2.053e-06	2.81919e-06	4.11052e-05	1.85862e-05	3.38818e-06	8.32838e-06
ENSSSCT00000000647	ENSSSCG00000000602	RERG	5:57349381-57462804	2263	0.0140706	0.0916384	0.0437402	0.24932	0.0825171	0.158516
ENSSSCT00000000651	ENSSSCG00000000605	ERP27	5:57600410-57628157	3108	0.0250874	0.0511064	0.00779485	0.0889054	0.0539541	0.047171
ENSSSCT00000000654	ENSSSCG00000000608	-	5:57723337-57725790	1329	0.0210759	0	0	0.0187048	0	0
ENSSSCT00000000657	ENSSSCG00000000611	WBP11	5:57749942-57767151	3173	2.93739	4.91695	4.11825	5.84256	5.07905	5.69292
ENSSSCT00000000658	ENSSSCG00000000612	ATF7IP	5:58022732-58133487	8109	0.0815229	0.000415133	0.000510573	0.000597016	0.000561742	0.000794962
ENSSSCT00000000659	ENSSSCG00000026724	PLBD1	5:57780928-57903380	4614	0.0148121	5.9614e-33	0.000181103	0.0401879	0.0177671	0.0412995
ENSSSCT00000000665	ENSSSCG00000000619	FAM234B	5:59414089-59454022	2182	0.827738	0.331514	0.659108	0.887266	0.671545	0.830392
ENSSSCT00000000669	ENSSSCG00000000623	BCL2L14	5:60333081-60357900	3151	1.64022	1.07458	1.22153	0.927379	1.14679	0.987964
ENSSSCT00000000671	ENSSSCG00000000625	LRP6	5:60168450-60314284	4675	4.38284	3.95895	3.37382	3.8965	4.34109	4.28635
ENSSSCT00000000674	ENSSSCG00000000629	-	5:61092027-61098091	1827	1.37798	1.6395	1.45651	4.94604	4.35989	4.44486
ENSSSCT00000000675	ENSSSCG00000000629	-	5:61092044-61096522	1471	0.0342578	1.94922e-06	0.0979616	7.15298e-06	0.186795	0.137459
ENSSSCT00000000676	ENSSSCG00000040242	TP23	5:61076298-61081148	1536	5.8923e-07	1.4194e-06	0.0324687	3.1948e-06	0.100291	0.0899981
ENSSSCT00000000678	ENSSSCG00000000631	TAS2R9	5:61253927-61254863	936	0	0.064898	0.208372	0.0282046	0.0681538	0.0596224
ENSSSCT00000000680	ENSSSCG00000000633	YBX3	5:61337862-61361279	1744	9.20279	19.4211	18.0504	18.8096	21.4139	19.6514
ENSSSCT00000000682	ENSSSCG00000000635	-	5:61425828-61433947	896	1.67277	2.36115	1.09891	1.81427	1.61707	1.69755
ENSSSCT00000000683	ENSSSCG00000000636	-	5:61441124-61457839	787	0.0785212	0.0803928	0.405941	0.104792	0.0844102	0.0738398
ENSSSCT00000000688	ENSSSCG00000000639	-	5:61583839-61596989	1054	0	0.056293	0.0258024	0	0	0
ENSSSCT00000000689	ENSSSCG00000000640	-	5:61624595-61629234	1257	0.0493466	0.201129	0.318684	5.37614e-17	0.105675	0.0488643
ENSSSCT00000000691	ENSSSCG00000040465	KLRK1	5:61623449-61655304	3642	0.199447	0.139336	0.266833	0.144253	0.165415	0.103955
ENSSSCT00000000696	ENSSSCG00000000645	GABARAPL1	5:61758136-61767601	1928	23.9491	49.8987	38.4548	37.4499	37.4934	36.7495
ENSSSCT00000000698	ENSSSCG00000000647	OLR1	5:61799355-61809691	1556	1.18266	0.972391	0.775259	1.6598	0.851275	1.05925
ENSSSCT00000000699	ENSSSCG00000000648	CLEC7A	5:61833014-61844789	653	0.0499024	0	0.188184	0.00577061	0.0992201	0.0114543
ENSSSCT00000000700	ENSSSCG00000000648	CLEC7A	5:61833026-61844773	606	0	0.11322	0	0	0	0
ENSSSCT00000000701	ENSSSCG00000000648	CLEC7A	5:61832346-61844807	1458	3.24205e-06	4.92363e-23	3.09636e-06	0.0820278	0.0641653	0.0846738
ENSSSCT00000000703	ENSSSCG00000000649	CLEC1A	5:61849260-61870248	986	3.81636	5.30313	4.47256	3.17913	4.92928	3.92027
ENSSSCT00000000705	ENSSSCG00000000651	CLEC12B	5:61908730-61915199	843	0	0	0	0	0.0173186	6.38032e-05
ENSSSCT00000000708	ENSSSCG00000000653	CD69	5:62078133-62084976	559	3.18758e-06	0.060143	2.29302e-05	3.83411e-05	7.20163e-06	9.50434e-06
ENSSSCT00000000709	ENSSSCG00000000653	CD69	5:62077987-62085900	1752	1.0062	1.2479	1.11319	0.645207	1.0946	0.79807
ENSSSCT00000000711	ENSSSCG00000000655	KLRF1	5:62031829-62044336	2490	0.052897	0.053899	0.0789375	0.121884	0.124592	0.109012
ENSSSCT00000000715	ENSSSCG00000000659	-	5:62276262-62325141	4281	4.42508	5.76582	5.23921	4.01092	6.90342	5.29827
ENSSSCT00000000716	ENSSSCG00000000660	A2M	5:62437646-62485537	7467	2.25711e-06	3.52398e-06	3.14115e-06	3.41045e-06	0.0651028	0.0697959
ENSSSCT00000000717	ENSSSCG00000000661	PHC1	5:62558597-62577503	3008	5.67476e-13	4.08109e-10	1.11278e-05	4.85179e-05	4.47494e-06	4.5996e-06
ENSSSCT00000000718	ENSSSCG00000040743	M6PR	5:62546200-62557674	2811	9.34145	14.7172	11.6833	18.4932	15.4844	17.0025
ENSSSCT00000000719	ENSSSCG00000000663	-	5:62506008-62523810	2172	0.208259	0.199777	0.35436	0.184606	0.288613	0.218085
ENSSSCT00000000720	ENSSSCG00000000664	-	5:62603251-62647105	4363	1.12377e-222	0	0	2.79358e-94	1.61507e-160	6.52623e-68
ENSSSCT00000000721	ENSSSCG00000000665	RIMKLB	5:62686466-62723919	1579	0.0838617	0.0078773	5.17169e-106	0.153274	0.0113009	0.160697
ENSSSCT00000000722	ENSSSCG00000031712	MFAP5	5:62742569-62757491	907	7.26767	10.1965	4.12229	10.5458	2.49912	6.37813
ENSSSCT00000000723	ENSSSCG00000000667	AICDA	5:62777229-62787483	2364	0	0	0	0	0.0119747	0.0104773
ENSSSCT00000000724	ENSSSCG00000000668	APOBEC1	5:62812290-62820663	1229	22.3539	19.3893	12.0988	4.33713	3.50974	4.02203
ENSSSCT00000000728	ENSSSCG00000000672	CLSTN3	5:63572074-63599505	3372	0.112397	0.0513757	3.40082e-07	0.156384	0.103023	0.0962871
ENSSSCT00000000732	ENSSSCG00000033913	C1RL	5:63591516-63639218	1767	1.08648	1.91515	2.82649	2.24595	2.12249	2.57982
ENSSSCT00000000733	ENSSSCG00000000675	C1R	5:63646324-63655144	2094	10.7412	21.4806	10.3251	25.5415	23.1429	24.1006
ENSSSCT00000000740	ENSSSCG00000000679	LRRC23	5:63809131-63817218	1614	0.215158	0.233311	0.314961	0.0901975	0.124018	0.171832
ENSSSCT00000000741	ENSSSCG00000000680	GPR162	5:63885714-63891266	2515	5.19152e-142	1.46713e-18	0	0	0.000543665	3.16983e-12
ENSSSCT00000000742	ENSSSCG00000000681	P3H3	5:63871507-63884835	2549	0.577822	0.525662	0.346426	0.777236	0.50814	0.637902
ENSSSCT00000000743	ENSSSCG00000000682	GNB3	5:63863655-63870433	1691	0.0482891	0	0	0.0999303	0.0689864	0.0603574
ENSSSCT00000000744	ENSSSCG00000000683	CDCA3	5:63859540-63861900	1126	1.17298	0.182331	0.239887	0.211141	0.246224	0.314449
ENSSSCT00000000745	ENSSSCG00000000684	USP5	5:63843032-63859572	4722	1.94568	3.08128	2.09405	4.10669	3.68608	3.97909
ENSSSCT00000000746	ENSSSCG00000000685	TPI1	5:63832434-63842925	1347	7.63619	9.30062	8.7176	8.43777	10.6726	10.057
ENSSSCT00000000748	ENSSSCG00000000687	CD4	5:63892133-63918466	2704	0.147706	0.286993	1.41116e-12	0.0738824	1.2988e-05	0.000102751
ENSSSCT00000000749	ENSSSCG00000000687	CD4	5:63892131-63918435	2881	0.144453	0.000241825	0.153726	0.000399821	6.11426e-09	2.72101e-08
ENSSSCT00000000750	ENSSSCG00000000688	LAG3	5:63929623-63935410	1925	0.0279275	0.0427089	0.0391069	0.0619038	0.0897424	0.065432
ENSSSCT00000000752	ENSSSCG00000000690	MLF2	5:63951663-63957143	1806	8.0857	11.8806	10.6283	10.487	10.2146	10.6385
ENSSSCT00000000753	ENSSSCG00000000691	COPS7A	5:63970547-63977201	1824	3.57647	4.58485	5.0773	2.59015	5.00123	3.81629
ENSSSCT00000000754	ENSSSCG00000000692	PIANP	5:63992908-63999429	2490	0.0211458	0.0107661	0	0.00936393	0.0113125	0.00989787
ENSSSCT00000000755	ENSSSCG00000000693	NCAPD2	5:64136506-64167410	5243	1.1933	0.883901	0.831177	1.56358	1.3388	1.45294
ENSSSCT00000000756	ENSSSCG00000000694	GAPDH	5:64129678-64133990	1320	40.7052	56.6527	38.248	65.2309	57.0915	61.323
ENSSSCT00000000757	ENSSSCG00000000695	IFFO1	5:64116151-64129264	2768	0.198496	0.221477	0.105758	0.27639	0.192244	0.239029
ENSSSCT00000000758	ENSSSCG00000000696	NOP2	5:64106097-64115582	2692	1.86927	3.3228	2.8869	3.16614	3.52266	3.45605
ENSSSCT00000000759	ENSSSCG00000000697	CHD4	5:64065991-64105173	6500	7.14251	12.4697	7.3265	15.3769	12.6805	14.135
ENSSSCT00000000761	ENSSSCG00000000699	LPAR5	5:64049490-64060246	2366	0.189954	0.159412	0.229311	0.178259	0.334988	0.261694
ENSSSCT00000000762	ENSSSCG00000000700	ACRBP	5:64027875-64047847	4108	2.66035	2.51167	2.19037	2.56645	2.58588	2.63676
ENSSSCT00000000764	ENSSSCG00000000702	ZNF384	5:64012802-64024560	1614	3.03371	3.25005	2.9927	3.53023	4.10448	3.73406
ENSSSCT00000000765	ENSSSCG00000000703	VAMP1	5:64184355-64185800	357	0.00143751	2.11064	0.598611	0.000887386	0.972455	0.00133412
ENSSSCT00000000766	ENSSSCG00000000704	TAPBPL	5:64188186-64197130	3128	3.38792	5.11735	4.82558	5.63467	5.02907	5.46561
ENSSSCT00000000767	ENSSSCG00000000705	CD27	5:64197212-64202615	1510	0.0867314	0.00074663	0.0023496	0.211965	0.0778795	0.115838
ENSSSCT00000000768	ENSSSCG00000000706	LTBR	5:64271371-64278431	2060	8.34162	12.4718	8.21574	11.9531	11.9959	12.6756
ENSSSCT00000000769	ENSSSCG00000000707	SCNN1A	5:64287522-64313609	3042	0.00418078	0.728169	0.219949	1.4189	0.731752	1.20012
ENSSSCT00000000771	ENSSSCG00000000708	TNFRSF1A	5:64319043-64331909	2235	4.83743	9.01537	6.31833	10.2175	8.69647	8.90666
ENSSSCT00000000772	ENSSSCG00000000709	PLEKHG6	5:64331079-64349498	4053	1.80775	4.1106	2.17106	3.13474	3.2221	3.14144
ENSSSCT00000000773	ENSSSCG00000022230	CD9	5:64420582-64459763	699	0.218952	0.480069	0.181601	0.161488	0.190437	0.33529
ENSSSCT00000000775	ENSSSCG00000000712	VWF	5:64519187-64678840	8932	2.81183e-06	3.09675e-06	2.34398e-06	3.23256e-06	4.30399e-06	3.57904e-06
ENSSSCT00000000776	ENSSSCG00000000713	-	5:64986831-65001820	786	0	0	0	0	0.0422728	0
ENSSSCT00000000779	ENSSSCG00000000716	KCNA1	5:65562169-65563657	1488	0.0185547	0	0	0.0164616	0.0198876	0
ENSSSCT00000000780	ENSSSCG00000000717	KCNA6	5:65625584-65659219	5144	0.00494715	0.0705059	0.00921418	0.04819	0	0.0277841
ENSSSCT00000000782	ENSSSCG00000000719	-	5:65760200-65789223	1741	8.9536	7.39772	7.30891	6.1079	5.5557	5.26276
ENSSSCT00000000783	ENSSSCG00000000720	AKAP3	5:65794730-65840172	2617	2.92011e-05	2.88417e-06	4.10757e-05	2.89914e-05	1.62669e-05	1.44453e-05
ENSSSCT00000000784	ENSSSCG00000000721	DYRK4	5:65816416-65839668	1572	0.0215702	1.33292e-34	0.0263262	7.55014e-102	0	0
ENSSSCT00000000785	ENSSSCG00000000722	RAD51AP1	5:65837562-65897144	1804	0.186946	0.219497	0.22469	0.138255	0.113738	0.075531
ENSSSCT00000000786	ENSSSCG00000000723	C12orf4	5:65892909-65939562	2712	1.73511	1.50436	1.98225	1.82599	1.18492	1.48288
ENSSSCT00000000791	ENSSSCG00000000728	PARP11	5:66443547-66482346	2445	0.188778	0.132072	0.158008	0.0677158	0.0412908	1.06109e-06
ENSSSCT00000000793	ENSSSCG00000000730	PRMT8	5:66665262-66753868	4388	0.0174923	0.0237467	0.0217277	0.0309859	0.0623885	0.0545888
ENSSSCT00000000795	ENSSSCG00000000732	CRACR2A	5:66530500-66644967	2619	0.272447	0.294085	0.219049	0.523873	0.653038	0.633894
ENSSSCT00000000797	ENSSSCG00000000734	-	5:66853403-66911569	2798	0.0515634	0.219958	0.391652	0.000161729	1.4838e-05	8.15491e-05
ENSSSCT00000000798	ENSSSCG00000000735	TSPAN9	5:66913754-67106257	4105	3.27853	2.8212	2.71001	3.03119	1.99718	2.57223
ENSSSCT00000000799	ENSSSCG00000000736	TEAD4	5:67124725-67193970	5545	0.0609125	0.428287	0.120755	1.16295	0.736324	0.909085
ENSSSCT00000000800	ENSSSCG00000000736	TEAD4	5:67130356-67194381	1701	2.05498e-05	0.606841	1.76036e-05	0.834109	0.693218	0.82077
ENSSSCT00000000801	ENSSSCG00000000737	TULP3	5:67201690-67238276	1736	0.56182	1.20264	0.719144	0.414491	0.565379	0.594376
ENSSSCT00000000802	ENSSSCG00000000738	RHNO1	5:67239908-67246660	1747	1.26252	0.844697	0.584965	0.713691	0.5542	0.756506
ENSSSCT00000000803	ENSSSCG00000000739	FOXM1	5:67241909-67265377	5828	0.135116	0.0398527	0.0283541	0.046967	0.0325735	0.0438815
ENSSSCT00000000805	ENSSSCG00000000741	NRIP2	5:67280923-67292348	3478	0.00743028	0.0378353	0.00692418	0.0329103	0.0318058	0.0278292
ENSSSCT00000000806	ENSSSCG00000000742	ITFG2	5:67290111-67305758	5367	1.01335	1.17946	0.952461	1.20971	1.10404	1.15142
ENSSSCT00000000807	ENSSSCG00000000743	FKBP4	5:67314010-67321630	1549	111.446	89.6403	84.765	59.535	76.6402	68.0845
ENSSSCT00000000808	ENSSSCG00000000744	-	5:67323737-67324292	537	0.065214	0.0670602	0.123472	0.174687	0.211095	0.307711
ENSSSCT00000000809	ENSSSCG00000000745	DDX11	5:67363830-67395733	3740	1.23083	0.479547	0.56526	1.26258	2.53571	1.88108
ENSSSCT00000000810	ENSSSCG00000000746	WASHC1	5:67395875-67409452	1409	7.73463	9.81598	6.32639	9.73655	9.14364	9.16133
ENSSSCT00000000812	ENSSSCG00000000748	IQSEC3	5:67445841-67541312	7235	0.00697055	0.0070942	0.00324442	0.00925721	0	0.00652335
ENSSSCT00000000813	ENSSSCG00000000749	SLC6A12	5:67550287-67572854	3019	9.75761e-05	0.000100047	0	8.62727e-05	5.93439e-07	5.16344e-07
ENSSSCT00000000815	ENSSSCG00000000751	CCDC77	5:67725832-67756868	2952	0.397329	0.521661	0.493874	0.672784	0.680452	0.669791
ENSSSCT00000000817	ENSSSCG00000000753	WNK1	5:68088540-68139930	5907	4.73009	4.43924	4.09817	5.62483	5.07918	5.28337
ENSSSCT00000000818	ENSSSCG00000000754	RAD52	5:68144207-68167642	1789	0.187619	0.189593	0.0824222	0.151568	0.0376508	0.0849816
ENSSSCT00000000819	ENSSSCG00000000755	ERC1	5:68252032-68691230	2970	1.7855	2.53088	1.8607	2.10558	3.102	2.45845
ENSSSCT00000000821	ENSSSCG00000000757	ADIPOR2	5:68760095-68807226	3650	1.21624	2.31624	1.77099	4.16213	3.13323	3.76683
ENSSSCT00000000823	ENSSSCG00000000759	-	5:68627348-68731931	2006	0.747663	0.138832	0.217271	0.085448	0.506969	0.507806
ENSSSCT00000000824	ENSSSCG00000000760	LRTM2	5:68822322-68836580	3661	0.0140841	0.035856	0.00656168	0.0499024	0.0979621	0.0527473
ENSSSCT00000000827	ENSSSCG00000027725	CACNA1C	5:69271052-69448130	6141	4.09611e-05	0.039993	8.35257e-06	0.0411788	2.61686e-05	1.44316e-05
ENSSSCT00000000828	ENSSSCG00000000764	HDHD5	5:69500284-69512611	1242	1.00941	0.185978	0.553959	0.909534	0.586053	0.619541
ENSSSCT00000000830	ENSSSCG00000000766	CECR2	5:69621878-69741434	4311	0.149107	0.240921	0.250022	0.329887	0.31053	0.305555
ENSSSCT00000000831	ENSSSCG00000000767	ATP6V1E1	5:69748351-69772077	850	17.7803	17.2824	13.4936	17.3925	14.5883	16.9367
ENSSSCT00000000833	ENSSSCG00000000769	BID	5:69849014-69875853	1552	13.2292	7.15898	9.66293	5.9383	5.90235	5.89476
ENSSSCT00000000834	ENSSSCG00000000770	MICAL3	5:69890144-69985424	5851	0.444239	1.32506	0.000127797	0.801701	0.895105	1.05211
ENSSSCT00000000835	ENSSSCG00000027190	PEX26	5:70133023-70142503	3883	3.42643	4.86841	2.92388	5.15598	3.82998	4.49248
ENSSSCT00000000837	ENSSSCG00000000190	TUBA1B	5:15150239-15153613	1573	3.71675	9.6854	3.2011	8.01399	10.5961	7.97222
ENSSSCT00000000838	ENSSSCG00000000774	USP18	5:70205754-70226241	1142	4.70559	1.27077	1.45899	1.11184	1.50675	1.67273
ENSSSCT00000000841	ENSSSCG00000000777	-	5:70358654-70359334	588	0	0.0590147	0	0	0	0
ENSSSCT00000000843	ENSSSCG00000000779	KIF21A	5:70890674-70964319	4947	5.84235	3.28376	3.4855	2.47002	2.77379	2.53843
ENSSSCT00000000845	ENSSSCG00000000781	ABCD2	5:71121074-71181317	6740	0.0187371	0	0.0104661	0.0199077	0.0120245	0.0210428
ENSSSCT00000000846	ENSSSCG00000000782	-	5:71207275-71238310	1056	0	0	0.0257562	0	0	0
ENSSSCT00000000848	ENSSSCG00000000783	SLC2A13	5:71295007-71673893	7203	0.661709	0.808852	0.55406	1.05392	0.655303	0.894484
ENSSSCT00000000849	ENSSSCG00000000784	LRRK2	5:71800336-71944105	7580	1.38912	2.02927	1.41371	2.80394	1.88376	2.42267
ENSSSCT00000000855	ENSSSCG00000000789	CNTN1	5:72168560-72493742	3767	7.94701e-39	3.22953e-08	8.42734e-07	0.000959171	3.17252e-05	0.00144545
ENSSSCT00000000857	ENSSSCG00000000791	PDZRN4	5:72787913-72940818	5487	0.0648015	0.0471169	0.0818927	0.229528	0.381256	0.3076
ENSSSCT00000000859	ENSSSCG00000000793	PPHLN1	5:73556214-73696397	3369	3.03857	3.88877	2.77371	3.84415	3.31326	3.41877
ENSSSCT00000000861	ENSSSCG00000000795	ADAMTS20	5:74503530-74672835	5973	1.18049e-08	1.08334e-11	3.64662e-06	3.87004e-06	2.77107e-10	3.89899e-06
ENSSSCT00000000862	ENSSSCG00000000795	ADAMTS20	5:74503115-74672703	6496	4.06008e-10	0.06953	4.38966e-09	2.00539e-09	0.0249855	7.24132e-10
ENSSSCT00000000865	ENSSSCG00000000798	TWF1	5:74868590-74881218	3142	7.20943	8.50013	6.11345	8.98313	8.7559	9.24373
ENSSSCT00000000866	ENSSSCG00000000799	IRAK4	5:74842183-74858125	1382	2.56066	3.90971	4.22333	3.68577	3.54502	3.47974
ENSSSCT00000000867	ENSSSCG00000000800	PUS7L	5:74803483-74834421	4843	0.233677	0.345473	0.395466	0.47886	0.362135	0.334327
ENSSSCT00000000868	ENSSSCG00000000801	TMEM117	5:74926272-75402497	1718	0.223637	0.221829	0.115252	0.327595	0.161326	0.342136
ENSSSCT00000000870	ENSSSCG00000000802	NELL2	5:75505716-75836327	2747	0.00625849	0.100421	0.00735765	0.135096	1.56657e-05	0.056701
ENSSSCT00000000873	ENSSSCG00000000804	ANO6	5:76238922-76334021	2601	3.8374	14.265	5.54031	11.8773	10.3003	10.5446
ENSSSCT00000000875	ENSSSCG00000000806	SCAF11	5:76808986-76876612	6999	1.04336	0.794442	0.849562	1.21315	1.51001	1.64418
ENSSSCT00000000876	ENSSSCG00000000807	SLC38A1	5:77011949-77058427	1416	1.96551	9.91524	2.19207	4.79949	2.29863	3.94935
ENSSSCT00000000877	ENSSSCG00000000808	SLC38A2	5:77113493-77127714	4867	13.02	17.614	9.06488	11.8458	13.1523	12.6788
ENSSSCT00000000878	ENSSSCG00000000808	SLC38A2	5:77113494-77127650	5861	2.65305	4.4684	3.81723	3.42524	3.32179	3.3204
ENSSSCT00000000879	ENSSSCG00000000810	AMIGO2	5:77642194-77645753	3214	2.57508	1.77591	2.09914	1.48035	1.98705	1.72348
ENSSSCT00000000880	ENSSSCG00000000811	PCED1B	5:77781713-77795179	2252	0.328264	0.181743	0.221406	0.265309	0.271461	0.265937
ENSSSCT00000000881	ENSSSCG00000000812	-	5:77759889-77760551	576	0	0.0607291	0.0558714	0.105484	0.0637322	0.111487
ENSSSCT00000000883	ENSSSCG00000028397	-	5:78319208-78324904	1488	6.89506	7.34461	2.81426	10.1727	5.82011	8.03005
ENSSSCT00000000884	ENSSSCG00000028397	-	5:78319045-78324862	1401	7.31919	13.2939	8.6657	14.8118	12.4567	13.6604
ENSSSCT00000000889	ENSSSCG00000000816	SENP1	5:78423136-78476313	3807	0.595302	0.608002	0.709299	0.993552	0.973123	1.22567
ENSSSCT00000000891	ENSSSCG00000034703	-	5:78742329-78743286	957	0.21629	0.157954	0	0.0274594	0	0
ENSSSCT00000000895	ENSSSCG00000034094	-	5:78789320-78790238	918	0	0	0	0	0.0348886	0
ENSSSCT00000000910	ENSSSCG00000000837	CHST11	5:79792792-79994685	1118	5.94625e-05	0.196817	0.000299272	0.111027	0.299654	0.208186
ENSSSCT00000000911	ENSSSCG00000000838	SLC41A2	5:79620577-79718079	1721	0.849977	0.513488	0.534662	0.681893	0.581755	0.507069
ENSSSCT00000000912	ENSSSCG00000000839	ALDH1L2	5:79491977-79548208	3354	5.79799e-07	0.0340046	0.0321834	0.031506	0.0302626	0.0294281
ENSSSCT00000000913	ENSSSCG00000000839	ALDH1L2	5:79492686-79554896	3308	3.7669	2.66939	2.80656	3.45773	3.53129	3.35811
ENSSSCT00000000914	ENSSSCG00000000840	WASHC4	5:79417711-79474612	5247	4.29044	5.8786	4.02114	4.10979	4.91449	4.2459
ENSSSCT00000000915	ENSSSCG00000000841	APPL2	5:79356066-79412235	3181	12.5757	15.6367	12.4036	11.173	12.1808	11.8938
ENSSSCT00000000916	ENSSSCG00000000842	KANSL2	5:79281585-79305246	2175	2.75461	3.13743	1.3602	2.72556	2.53236	2.82703
ENSSSCT00000000917	ENSSSCG00000000843	TXNRD1	5:80170333-80236277	3798	9.88075	24.6984	4.95034	19.683	23.0021	21.281
ENSSSCT00000000919	ENSSSCG00000000844	NFYB	5:80333756-80353708	2682	0.97241	1.26785	0.784838	1.63527	1.21958	1.30105
ENSSSCT00000000923	ENSSSCG00000000846	HCFC2	5:80368243-80409786	9101	1.39009	1.73064	1.52725	1.76035	1.59726	1.64453
ENSSSCT00000000924	ENSSSCG00000000847	TDG	5:80437958-80492252	2993	2.19285	2.96053	2.4579	3.24581	2.30983	2.7952
ENSSSCT00000000925	ENSSSCG00000000848	GLT8D2	5:80421625-80473108	1634	2.00469	1.82445	1.1332	1.24888	0.948927	1.11943
ENSSSCT00000000926	ENSSSCG00000000849	-	5:80512207-80520068	1690	73.3427	41.8618	55.7795	58.6618	58.5905	57.815
ENSSSCT00000000929	ENSSSCG00000000854	STAB2	5:80694225-80858598	8308	3.94892e-06	3.98079e-06	3.93208e-06	0.0160756	4.36008e-06	0.0113275
ENSSSCT00000000930	ENSSSCG00000000853	NT5DC3	5:80646279-80688504	1458	5.80297	14.3156	5.54533	12.3758	11.7914	12.2564
ENSSSCT00000000931	ENSSSCG00000000854	STAB2	5:80694689-80858431	7647	0.0131698	0.00669933	0.00612723	7.61908e-08	0.00351771	6.658e-07
ENSSSCT00000000934	ENSSSCG00000000856	PAH	5:81391436-81453790	1191	34.7857	30.2038	28.5259	15.1462	18.9562	17.9293
ENSSSCT00000000935	ENSSSCG00000000857	IGF1	5:81776640-81832917	823	0.101231	7.02668e-07	0.0806486	1.8138e-20	8.19065e-07	1.42876e-10
ENSSSCT00000000936	ENSSSCG00000000857	IGF1	5:81776421-81848048	879	4.34637	5.58237	2.3645	4.46777	5.47403	5.10016
ENSSSCT00000000937	ENSSSCG00000000858	PMCH	5:82018815-82020334	867	0.0348254	0	0.0326953	0	0	0
ENSSSCT00000000938	ENSSSCG00000000859	PARPBP	5:82019181-82091387	3090	0.20221	0.151397	0.475666	0.744751	0.549294	0.709115
ENSSSCT00000000939	ENSSSCG00000000860	NUP37	5:82091455-82145089	2807	0.763664	0.936929	0.676974	0.770959	0.78754	0.884511
ENSSSCT00000000941	ENSSSCG00000000862	GNPTAB	5:82361905-82460801	5317	9.10897	10.4338	8.31484	11.0868	9.447	10.1943
ENSSSCT00000000943	ENSSSCG00000000864	CHPT1	5:82500692-82544732	1949	6.49733	4.53942	6.62749	3.29321	3.85291	3.33281
ENSSSCT00000000945	ENSSSCG00000000866	MYBPC1	5:82557988-82651044	3995	0.00639259	0	0.0830311	0	0	0
ENSSSCT00000000947	ENSSSCG00000000867	-	5:82727405-82744754	756	2.04497e-06	0.248775	0.0708738	0.130112	0.0791338	0.110785
ENSSSCT00000000949	ENSSSCG00000000869	UTP20	5:82813700-82913162	8692	1.64451	2.88822	1.99868	3.5028	3.44018	3.5132
ENSSSCT00000000950	ENSSSCG00000000870	ARL1	5:82795824-82812144	3306	12.3572	11.8041	11.0896	11.7143	12.3697	12.0427
ENSSSCT00000000951	ENSSSCG00000000871	SLC5A8	5:82973249-83030996	6315	0.177413	0.326705	0.22471	0.253965	0.271936	0.289371
ENSSSCT00000000956	ENSSSCG00000000873	ANO4	5:83052966-83411449	4007	0	0.0224152	0	0.157011	2.66251e-06	0.0402313
ENSSSCT00000000957	ENSSSCG00000000874	GAS2L3	5:83562167-83600308	2713	0.446772	0.113605	0.0600748	0.169436	0.185885	0.144558
ENSSSCT00000000960	ENSSSCG00000000877	SCYL2	5:83813208-83878760	5673	2.85929	1.85597	3.14625	2.08933	1.66968	1.90271
ENSSSCT00000000963	ENSSSCG00000025682	ACTR6	5:83908882-83929081	2369	2.10897	1.54646	1.67585	1.84939	1.69656	1.83982
ENSSSCT00000000964	ENSSSCG00000000882	ANKS1B	5:84080902-85065974	2838	0	0	0	1.70768e-07	3.39415e-05	2.96975e-05
ENSSSCT00000000965	ENSSSCG00000000882	ANKS1B	5:84080421-84882383	3278	0.00783049	1.353e-06	0	1.04088e-06	2.44482e-12	2.13914e-12
ENSSSCT00000000966	ENSSSCG00000000882	ANKS1B	5:84245512-84848517	2700	0	0.019773	0	0.0515976	0.0103534	0.00905881
ENSSSCT00000000967	ENSSSCG00000000883	-	5:84715296-84721530	1335	0	0	0.00984392	0	0	0
ENSSSCT00000000968	ENSSSCG00000000884	APAF1	5:85166459-85258392	6689	0.259854	0.807348	0.0917674	1.49012	0.000220417	0.642934
ENSSSCT00000000970	ENSSSCG00000000886	SLC25A3	5:85284405-85292336	1393	47.4855	62.3512	47.6024	50.2343	46.7345	48.6644
ENSSSCT00000000971	ENSSSCG00000038487	TMPO	5:85319226-85346639	1564	0.208738	0.00585639	0.249484	0.153557	0.298089	0.186338
ENSSSCT00000000974	ENSSSCG00000000890	NEDD1	5:86695663-86737250	2034	1.00166	1.87801	0.917887	1.9338	1.75061	1.93447
ENSSSCT00000000975	ENSSSCG00000000891	LTA4H	5:87486712-87518357	1835	26.9846	18.2131	28.4659	16.4521	21.2627	19.0308
ENSSSCT00000000976	ENSSSCG00000000892	HAL	5:87522524-87547855	3818	0.128049	0.363747	0.665636	0.250735	0.620221	0.435405
ENSSSCT00000000977	ENSSSCG00000000893	AMDHD1	5:87553021-87569246	1161	0.956604	1.0554	0.645079	1.02696	1.21428	1.17787
ENSSSCT00000000978	ENSSSCG00000000894	CCDC38	5:87576178-87614126	1638	0	0.0648439	1.89473e-40	3.71991e-30	0.017866	1.22013e-36
ENSSSCT00000000979	ENSSSCG00000000895	SNRPF	5:87613931-87622951	1761	0.985158	1.27148	1.00629	1.41968	1.03896	1.32744
ENSSSCT00000000980	ENSSSCG00000000896	NTN4	5:87671870-87784701	3734	1.57009	6.01664	2.37972	4.03174	2.96876	3.55055
ENSSSCT00000000981	ENSSSCG00000000897	-	5:87942610-87946902	588	0	0.0590147	0	0	0	0
ENSSSCT00000000984	ENSSSCG00000000900	VEZT	5:88035641-88104732	3023	3.99608	5.00328	1.54109	4.20372	3.44855	3.33765
ENSSSCT00000000985	ENSSSCG00000000901	FGD6	5:88104233-88225248	4284	1.11186	1.94625	1.15538	2.49624	2.00425	2.18054
ENSSSCT00000000986	ENSSSCG00000000902	NR2C1	5:88231261-88277997	3794	1.37474	1.90966	1.67776	1.96058	1.48172	1.8495
ENSSSCT00000000989	ENSSSCG00000000905	-	5:88292770-88317177	698	28.5721	23.6997	29.7225	22.9235	23.0786	23.2272
ENSSSCT00000000990	ENSSSCG00000000906	-	5:88606813-88679153	2514	0.453542	0.709055	0.3381	0.937465	1.26049	1.03007
ENSSSCT00000000991	ENSSSCG00000000907	PLXNC1	5:88900244-89055742	7120	1.09739	0.800467	0.0459542	0.539012	0.419935	0.228289
ENSSSCT00000000992	ENSSSCG00000000908	-	5:89702681-89707784	444	5.23189	8.96927	6.67008	8.36344	8.09563	7.52962
ENSSSCT00000000994	ENSSSCG00000000910	CRADD	5:89581082-89586275	2100	0.166056	0.168717	0.448637	0.44028	0.051698	0.39956
ENSSSCT00000000995	ENSSSCG00000000910	CRADD	5:89308385-89584530	1215	1.94138	1.59032	1.6797	1.14475	0.87354	0.985038
ENSSSCT00000000999	ENSSSCG00000000915	DCN	5:91678607-91713925	1482	44.8544	82.4787	32.3353	73.7277	47.3378	60.0221
ENSSSCT00000001000	ENSSSCG00000000916	LUM	5:91748493-91760563	6498	8.35285	5.61098	2.55714	9.44187	5.1142	7.20206
ENSSSCT00000001001	ENSSSCG00000000917	KERA	5:91796323-91801357	1020	9.12463e-05	1.43789	8.61439e-06	2.51425	0.000147423	1.0542
ENSSSCT00000001002	ENSSSCG00000000918	EPYC	5:91841210-91876981	963	0	0	0	0	0.0329278	0.0288061
ENSSSCT00000001004	ENSSSCG00000000920	POC1B	5:93132081-93222520	3027	2.07213	1.95108	1.70306	1.31605	1.52665	1.41389
ENSSSCT00000001005	ENSSSCG00000027898	ATP2B1	5:92936005-93061412	6905	0.51191	0.568141	0.350493	0.543589	0.202621	0.260027
ENSSSCT00000001006	ENSSSCG00000027898	ATP2B1	5:92938266-93058454	4262	0.282734	0.410979	0.292568	0.731486	0.746393	0.716753
ENSSSCT00000001009	ENSSSCG00000000924	C12orf50	5:94495453-94520115	1248	0.0159785	0.0231185	0.0648087	0.00235005	5.0286e-07	0.00969516
ENSSSCT00000001010	ENSSSCG00000000925	C12orf29	5:94473175-94489661	3164	1.59353	1.72222	1.71732	1.79505	1.65279	1.77481
ENSSSCT00000001011	ENSSSCG00000000926	CEP290	5:94384887-94469001	6851	0.782165	1.18552	1.30892	1.18816	1.47752	1.45876
ENSSSCT00000001012	ENSSSCG00000000927	TMTC3	5:94324305-94375527	1738	8.0206e-20	4.02003e-33	0.126826	3.2498e-07	3.75487e-72	6.26721e-10
ENSSSCT00000001018	ENSSSCG00000000932	NTS	5:96260551-96272970	1672	0.0162985	0.00554102	0.0304496	0.00722771	0.0174637	0.0152792
ENSSSCT00000001020	ENSSSCG00000000934	LRRIQ1	5:96802825-97002425	5164	0.0197038	0.0351032	0.05047	3.55439e-13	0.0632476	0.059953
ENSSSCT00000001022	ENSSSCG00000000936	SLC6A15	5:97092946-97151922	7083	0.00712356	0.010875	0.0165786	0.012614	0.00761904	0.00999993
ENSSSCT00000001023	ENSSSCG00000026533	MYF6	5:100760486-100764767	3758	0	0	0.012769	0	0	0
ENSSSCT00000001027	ENSSSCG00000000939	ACSS3	5:100288276-100429155	2119	3.21158	7.69124	3.55671	6.69356	7.94746	7.57224
ENSSSCT00000001028	ENSSSCG00000000940	PPFIA2	5:99954699-100275562	3561	0	2.0149e-204	4.44561e-129	6.09223e-297	4.74126e-155	6.81661e-286
ENSSSCT00000001029	ENSSSCG00000000941	METTL25	5:99291612-99359244	2128	3.68597e-08	0.0554395	3.29056e-14	8.91251e-09	3.27817e-10	5.23449e-21
ENSSSCT00000001030	ENSSSCG00000000941	METTL25	5:99291612-99359244	2158	7.90838e-09	0.103487	8.11538e-20	0.189591	6.10839e-15	3.52928e-22
ENSSSCT00000001032	ENSSSCG00000000943	OTOGL	5:101101457-101248996	6873	0.0220391	0.0299077	0.0307757	0.0292697	0.0196437	0.0206257
ENSSSCT00000001037	ENSSSCG00000000948	SYT1	5:101871313-102394307	4531	0.0788345	0.0815119	0.0419052	0.0698178	0.0662389	0.0685187
ENSSSCT00000001039	ENSSSCG00000000950	E2F7	5:104126951-104163407	5897	0.0644693	0.10937	0.0480218	0.0875306	0.0551685	0.0683852
ENSSSCT00000001040	ENSSSCG00000000951	-	5:104273628-104295140	899	0.966275	1.63585	0.938069	3.13983	1.00208	2.00372
ENSSSCT00000001041	ENSSSCG00000000952	-	5:104303611-104395288	2366	0.485264	1.02659	0.351992	0.278816	0.157922	0.370923
ENSSSCT00000001044	ENSSSCG00000000955	TBC1D22A	5:2530530-2787149	1509	12.3296	15.7288	12.8381	12.8991	14.3894	13.1032
ENSSSCT00000001046	ENSSSCG00000028869	CAND1	5:31657591-31696887	5671	4.46164	6.86693	4.71897	5.87915	5.70989	6.03763
ENSSSCT00000001047	ENSSSCG00000000958	DYRK2	5:32047732-32057938	2165	0.878281	1.14436	0.708063	1.48602	1.10727	1.17633
ENSSSCT00000001048	ENSSSCG00000000959	-	AEMK02000361.1:214422-750753	3726	3.58577e-05	0.0409688	9.44362e-05	0.0857184	0.200378	0.000238521
ENSSSCT00000001053	ENSSSCG00000000963	SYCE3	5:180841-200935	621	0.053362	0	0.050352	0.0475691	0	0
ENSSSCT00000001054	ENSSSCG00000000964	LMF2	5:233297-258794	2946	3.92185	4.7485	6.20909	4.4347	4.17619	4.26927
ENSSSCT00000001055	ENSSSCG00000000965	NCAPH2	5:220764-233549	4171	0.583955	0.794856	0.910469	0.881964	0.901028	0.822909
ENSSSCT00000001057	ENSSSCG00000000967	ODF3B	5:216065-217972	856	0.247624	0	0.166081	0	0	0
ENSSSCT00000001058	ENSSSCG00000000968	SBF1	5:266514-284163	5631	2.12535	2.85725	1.85065	4.77697	4.75239	4.77399
ENSSSCT00000001060	ENSSSCG00000000970	PPP6R2	5:285386-361301	3760	3.33528	3.47521	3.09113	5.23061	6.0681	5.84813
ENSSSCT00000001061	ENSSSCG00000000971	HDAC10	5:439835-445511	2845	0.844547	0.867764	0.0909454	0.771749	0.369531	0.665582
ENSSSCT00000001062	ENSSSCG00000000972	TUBGCP6	5:445717-467415	5175	0.348291	0.789169	0.406781	0.835174	0.854782	0.732087
ENSSSCT00000001063	ENSSSCG00000000973	SELENOO	5:467546-480836	2370	2.16379	2.45504	2.26814	3.28192	3.12885	3.0406
ENSSSCT00000001064	ENSSSCG00000000974	TRABD	5:486562-492066	1215	6.85882	8.21167	8.25741	5.95567	7.81569	6.77742
ENSSSCT00000001065	ENSSSCG00000000975	PANX2	5:497039-505979	3247	0.287499	0.707644	0.454038	0.785319	1.10255	0.964697
ENSSSCT00000001066	ENSSSCG00000000976	MOV10L1	5:510306-565316	3285	0.102557	0.0321394	0.0220577	0.0419331	0.0168858	0.0221618
ENSSSCT00000001068	ENSSSCG00000000978	MLC1	5:571693-594059	3953	0	0.0066187	0	0.0345438	0.00695508	0.0365132
ENSSSCT00000001070	ENSSSCG00000000980	ALG12	5:716939-729397	4221	1.84565	2.09556	2.60724	1.6723	1.94875	1.84721
ENSSSCT00000001071	ENSSSCG00000000981	CRELD2	5:707716-716917	2948	3.97014	3.60283	4.41828	6.5769	5.78268	6.32661
ENSSSCT00000001072	ENSSSCG00000000982	TTLL8	5:599862-644833	2520	1.4092e-07	1.76377e-07	2.18408e-06	4.93012e-07	9.7166e-09	2.11017e-10
ENSSSCT00000001073	ENSSSCG00000000983	-	5:646946-662557	4597	0.333413	0.967417	0.553807	0.999016	1.03444	1.05597
ENSSSCT00000001075	ENSSSCG00000000985	EXOC2	7:195081-341433	3906	2.75702	4.88947	3.29336	4.53272	4.9259	4.55869
ENSSSCT00000001080	ENSSSCG00000001577	TBC1D22B	7:32839145-32912697	1730	0.499162	0.534875	0.219276	0.516837	0.684197	0.621994
ENSSSCT00000001081	ENSSSCG00000000991	FOXQ1	7:664372-665566	1194	0.85768	1.67873	0.869717	1.07876	1.3033	1.45322
ENSSSCT00000001084	ENSSSCG00000000994	GMDS	7:846180-1285584	4420	3.41572	7.02346	5.41834	6.47478	6.37256	6.58171
ENSSSCT00000001087	ENSSSCG00000000997	PPP1R3G	7:2965060-3057806	4931	0.511628	0.515589	0.394667	0.713947	1.01728	0.870751
ENSSSCT00000001088	ENSSSCG00000000998	RPP40	7:2990402-3005638	4388	0.461658	0.694308	0.329304	0.946559	0.907054	0.994187
ENSSSCT00000001090	ENSSSCG00000000999	CDYL	7:2845808-2966058	2115	2.30717	2.77574	1.90596	2.99521	3.1459	3.18956
ENSSSCT00000001092	ENSSSCG00000001000	ECI2	7:2425614-2446259	2364	5.05512	7.6701	4.4026	11.9244	8.23861	10.1106
ENSSSCT00000001094	ENSSSCG00000001002	PRPF4B	7:2360480-2412908	3244	2.84308	3.08123	3.27079	5.0761	5.84334	4.91964
ENSSSCT00000001096	ENSSSCG00000001004	SLC22A23	7:1991927-2059886	1224	1.85055	2.71415	5.13686	2.79767	1.90982	2.20782
ENSSSCT00000001098	ENSSSCG00000001379	TUBB	7:23248026-23294218	2128	1.70045	2.49537	1.35957	3.46667	2.13274	3.05421
ENSSSCT00000001100	ENSSSCG00000001008	BPHL	7:1882730-1909853	1176	2.86103	3.46664	3.26846	2.47568	2.28877	2.18441
ENSSSCT00000001101	ENSSSCG00000001009	RIPK1	7:1840950-1878998	2606	1.0601	1.6471	1.27007	3.19213	2.33912	2.75038
ENSSSCT00000001102	ENSSSCG00000001010	-	7:1656441-1667876	3106	4.70988	7.15976	4.76589	7.06537	6.71723	7.06848
ENSSSCT00000001103	ENSSSCG00000001011	SERPINB1	7:1684214-1693281	2167	7.70774	10.1453	6.74875	7.54687	7.18079	7.58983
ENSSSCT00000001108	ENSSSCG00000038717	FARS2	7:3262355-3557258	1365	1.28393	1.93668	1.27224	3.16563	1.76482	3.05538
ENSSSCT00000001109	ENSSSCG00000026211	NRN1	7:3681830-3691969	2939	0.0443541	0.0271088	0	0	0	0
ENSSSCT00000001114	ENSSSCG00000001021	RREB1	7:4579102-4638176	4896	1.45772	2.02991	2.44371	3.54541	3.33616	3.44053
ENSSSCT00000001115	ENSSSCG00000001022	SSR1	7:4662948-4685892	3368	8.2306	10.347	8.63739	11.9275	12.246	11.8231
ENSSSCT00000001117	ENSSSCG00000001024	RIOK1	7:4750486-4776256	2036	0.996624	1.31174	0.91847	1.16877	1.10643	1.09321
ENSSSCT00000001118	ENSSSCG00000001025	DSP	7:4862564-4919236	13399	6.05149	12.0399	7.39731	13.637	11.6077	12.6301
ENSSSCT00000001119	ENSSSCG00000001025	DSP	7:4919297-4937363	3608	0.893779	0.983005	0.792862	1.1084	1.0559	1.08456
ENSSSCT00000001120	ENSSSCG00000001027	BMP6	7:5058035-5211316	4872	0.708569	0.884279	0.580558	0.866536	1.19795	0.925737
ENSSSCT00000001125	ENSSSCG00000034986	-	7:20728661-20729072	411	7.93049	4.48188	5.08822	4.55999	1.94681	3.37374
ENSSSCT00000001126	ENSSSCG00000001033	SLC35B3	7:5581755-5606551	2661	1.34883	1.5767	1.73109	0.730983	0.394326	0.484886
ENSSSCT00000001129	ENSSSCG00000001036	TFAP2A	7:7223099-7236490	1366	0.771745	1.58588	2.11879	3.19089	3.35232	3.41542
ENSSSCT00000001132	ENSSSCG00000001038	-	7:7462211-7469623	963	22.081	23.6409	30.1689	21.3941	21.1067	20.2795
ENSSSCT00000001134	ENSSSCG00000001040	C6orf52	7:7428058-7437987	3421	0.0453607	0.123191	0.0422725	0.0535775	0.121358	0.0637109
ENSSSCT00000001136	ENSSSCG00000001042	MAK	7:7481681-7538376	3490	8.49667e-06	0.0383864	0.0312024	0.111826	0.0633815	0.0839698
ENSSSCT00000001139	ENSSSCG00000001045	ELOVL2	7:7652225-7732262	3227	0.00803668	5.62025e-52	8.20785e-05	0.0103181	0	3.26865e-06
ENSSSCT00000001140	ENSSSCG00000023956	-	7:7806947-7842458	5115	0.378644	0.589826	0.260528	0.389706	0.397237	0.47664
ENSSSCT00000001142	ENSSSCG00000001048	ADTRP	7:8243294-8313651	1918	0.0140193	0	0	0.0372903	0	0.0262771
ENSSSCT00000001143	ENSSSCG00000001049	HIVEP1	7:8519344-8661137	8487	0.432911	0.119624	0.131512	0.711965	0.874464	0.665018
ENSSSCT00000001146	ENSSSCG00000001052	PHACTR1	7:9448433-9663850	1770	7.1578e-147	1.78829	4.79905e-41	2.5004	0.177038	1.46017
ENSSSCT00000001147	ENSSSCG00000001053	TBC1D7	7:9685273-9707478	1498	0.161489	7.43842e-05	0.161365	0.313406	0.367228	0.286756
ENSSSCT00000001150	ENSSSCG00000001056	RANBP9	7:9976957-10057257	1788	10.8154	14.5134	10.9521	18.1677	14.3468	15.4978
ENSSSCT00000001151	ENSSSCG00000001057	MCUR1	7:10119566-10142909	1437	4.786	4.7564	4.79516	2.66803	2.67262	2.53515
ENSSSCT00000001155	ENSSSCG00000001061	JARID2	7:11469782-11600306	3702	6.84931e-06	2.14241e-05	1.00792e-05	0.697635	0.558423	0.910983
ENSSSCT00000001157	ENSSSCG00000001062	DTNBP1	7:11602394-11720286	1367	3.6416	3.07162	3.09828	4.14253	3.32974	3.94211
ENSSSCT00000001158	ENSSSCG00000001063	-	7:12117239-12137926	3058	1.67582	5.66681	3.08461	10.2801	4.98031	7.65566
ENSSSCT00000001159	ENSSSCG00000001064	GMPR	7:12254387-12294555	1587	8.15651e-06	0.154769	0.362206	0.520687	0.20662	0.272801
ENSSSCT00000001160	ENSSSCG00000001065	ATXN1	7:12304693-12556417	2817	0.0525904	2.12263e-07	0.0576168	0.170979	0.14063	0.153794
ENSSSCT00000001162	ENSSSCG00000001067	STMND1	7:13024129-13039651	729	0.0432199	0.044281	0	0	0.0464911	0.0406681
ENSSSCT00000001163	ENSSSCG00000001068	CAP2	7:13230453-13350961	2890	0.293599	0.342576	0.12614	0.645244	0.445558	0.487618
ENSSSCT00000001165	ENSSSCG00000001070	FAM8A1	7:13378151-13390890	4367	6.11846	9.4337	7.8338	8.53829	8.16389	8.24052
ENSSSCT00000001166	ENSSSCG00000020858	KIF13A	7:13502626-13600634	4890	0.912725	0.722121	0.630932	1.02444	0.704809	0.710055
ENSSSCT00000001167	ENSSSCG00000001072	NHLRC1	7:13816245-13817644	1399	0.15909	0.345005	0.334698	0.352923	0.660883	0.428989
ENSSSCT00000001168	ENSSSCG00000001073	TPMT	7:13820890-13846247	1956	0.356795	0.573597	0.243389	0.450171	0.352765	0.437249
ENSSSCT00000001169	ENSSSCG00000001074	KDM1B	7:13845941-13901253	4827	1.90338	2.64354	2.05906	2.479	2.53602	2.64637
ENSSSCT00000001170	ENSSSCG00000001075	-	7:13901580-13934874	2848	15.5907	23.0574	16.126	16.7314	17.0712	16.4999
ENSSSCT00000001171	ENSSSCG00000001076	RNF144B	7:14039857-14125654	5257	1.37744	2.81818	1.98451	1.99534	1.64181	2.14439
ENSSSCT00000001173	ENSSSCG00000001078	MBOAT1	7:15532072-15643988	4130	3.34738	3.99006	4.42586	4.20237	4.05998	4.09892
ENSSSCT00000001175	ENSSSCG00000001080	CDKAL1	7:15910689-16570695	3268	0.990314	0.41125	0.799519	0.688199	0.872609	0.708768
ENSSSCT00000001176	ENSSSCG00000001081	SOX4	7:16891318-16892752	1434	4.37094	5.88121	2.85684	11.8408	6.50987	9.32316
ENSSSCT00000001178	ENSSSCG00000001083	-	7:17695811-17696497	654	0.0498057	0.0510831	0	0.0887545	0	0.0469034
ENSSSCT00000001180	ENSSSCG00000001085	DCDC2	7:19050010-19218914	1404	0	0.0202127	0	0.175751	0.106165	0.130036
ENSSSCT00000001183	ENSSSCG00000001087	MRS2	7:19244659-19295802	6492	0.638292	0.623613	0.601037	0.690673	0.619327	0.631992
ENSSSCT00000001184	ENSSSCG00000001088	-	7:19272031-19272388	357	0.373274	0.387716	1.19728	0.335999	0.812291	0.71019
ENSSSCT00000001185	ENSSSCG00000001089	GPLD1	7:19291180-19346312	4871	7.02172e-24	4.73112e-29	3.09367e-44	2.15318e-37	9.76788e-36	1.66405e-40
ENSSSCT00000001186	ENSSSCG00000001090	ALDH5A1	7:19351591-19375476	1512	1.37418	1.18759	0.983827	0.493902	0.363659	0.563558
ENSSSCT00000001187	ENSSSCG00000001091	KIAA0319	7:19386110-19451666	2733	0.0287421	0.0195211	0.00893332	0.0933844	0.0307675	0.0807609
ENSSSCT00000001188	ENSSSCG00000001092	TDP2	7:19488919-19502546	2736	1.97185	2.20625	1.86765	1.86346	1.96729	1.90695
ENSSSCT00000001189	ENSSSCG00000036411	ACOT13	7:19502636-19519820	820	6.54761	5.60775	7.83144	5.31476	5.34739	5.06168
ENSSSCT00000001191	ENSSSCG00000001095	GMNN	7:19586001-19595344	1481	3.53777	2.09718	2.7641	2.06197	2.52007	1.83328
ENSSSCT00000001192	ENSSSCG00000001096	ARMH2	7:19599098-19601900	708	0	0	0	0	0.0483153	0
ENSSSCT00000001193	ENSSSCG00000001097	-	7:19611116-19672144	3218	6.77802e-82	2.2276e-09	3.5589e-13	1.79139e-57	7.50572e-57	5.98317e-36
ENSSSCT00000001195	ENSSSCG00000001099	CMAH	7:19873778-19955840	2790	1.02167	1.30818	0.961324	0.863756	1.04347	1.05346
ENSSSCT00000001196	ENSSSCG00000001100	CARMIL1	7:20037410-20345470	4031	2.93291	4.9549	3.43266	3.52103	3.97016	3.79051
ENSSSCT00000001197	ENSSSCG00000001101	SCGN	7:20389492-20432978	1507	37.3364	29.834	54.0448	6.46726	6.38193	6.3212
ENSSSCT00000001203	ENSSSCG00000001107	SLC17A1	7:20458616-20573262	1542	0	2.29958e-10	0	0	0	0
ENSSSCT00000001227	ENSSSCG00000001131	-	7:20954860-20967000	1752	0.665642	1.01032	1.09874	1.16688	1.35995	1.45104
ENSSSCT00000001228	ENSSSCG00000001132	BTN1A1	7:20977994-20987783	5295	0.190059	0.0296956	0.0832948	0.026497	0.256684	0.167476
ENSSSCT00000001230	ENSSSCG00000031122	HIST1H2BB	7:20735560-20735941	381	11.3211	6.55633	8.83186	7.87826	7.71444	8.32615
ENSSSCT00000001233	ENSSSCG00000001137	HIST1H1D	7:20862941-20882693	1208	13.8924	6.74499	10.9858	9.74581	9.58088	9.3526
ENSSSCT00000001254	ENSSSCG00000001156	ZNF322	7:21128049-21143385	4517	1.76152	2.00577	1.33989	2.10922	1.65601	2.01093
ENSSSCT00000001262	ENSSSCG00000001164	ZNF184	7:21413424-21420031	2617	1.03401e-05	0.0645182	7.99738e-06	0.275639	0.0838913	0.103187
ENSSSCT00000001263	ENSSSCG00000040923	HIST1H2BN	7:21606835-21607215	357	6.09681	2.3263	3.35239	2.89333	1.75996	2.28839
ENSSSCT00000001265	ENSSSCG00000038403	-	7:5552492-5552968	476	0.622034	0.841315	0.886344	0.834537	0.88248	0.918761
ENSSSCT00000001267	ENSSSCG00000032609	HIST1H2AJ	7:21592996-21593389	393	8.00324	2.07149	5.64473	2.55266	2.05689	2.1982
ENSSSCT00000001278	ENSSSCG00000035803	OR2B6	7:21687799-21688729	930	0.127922	0	0.0300011	0.0568501	0.10303	0.120177
ENSSSCT00000001280	ENSSSCG00000039401	OR2B2	7:21651443-21652382	939	0.126446	0	0	0	0.0339453	0
ENSSSCT00000001294	ENSSSCG00000001196	-	7:21925367-21926306	939	0.0316115	0	0	0.0280957	0	0.0296961
ENSSSCT00000001295	ENSSSCG00000001197	ZNF165	7:21936250-21946015	2917	0.16989	0.258095	0.255599	0.21767	0.138809	0.196806
ENSSSCT00000001299	ENSSSCG00000001201	ZKSCAN8	7:21981149-22000834	7149	0.75374	0.647839	0.762894	1.1177	1.01231	0.993702
ENSSSCT00000001300	ENSSSCG00000001202	-	7:22010408-22011463	961	1.22687	1.84871	1.31904	1.23826	1.36727	0.957564
ENSSSCT00000001301	ENSSSCG00000001203	ZSCAN9	7:22082219-22088469	1722	0.11044	0.11263	0.0589429	0.223873	0.084519	0.192263
ENSSSCT00000001302	ENSSSCG00000001204	-	7:22093091-22101837	2385	0.121862	0.327386	0.289352	0.500749	0.29654	0.332105
ENSSSCT00000001303	ENSSSCG00000001205	NKAPL	7:22108646-22110123	1477	0.41161	0.190898	0.314792	0.182592	0.120324	0.175452
ENSSSCT00000001304	ENSSSCG00000001206	ZSCAN26	7:22114799-22133061	2348	0.0874613	0.780283	1.10833	0.941048	0.848835	1.1398
ENSSSCT00000001305	ENSSSCG00000001207	PGBD1	7:22135916-22155657	3108	0.665649	0.656973	0.598452	0.792445	0.535232	0.685794
ENSSSCT00000001307	ENSSSCG00000001209	ZSCAN12	7:22189820-22208745	3163	1.34634	0.953221	1.0483	1.20732	0.834686	0.976326
ENSSSCT00000001309	ENSSSCG00000001211	-	7:22234168-22235113	945	0.0627405	0	0	0	0	0
ENSSSCT00000001314	ENSSSCG00000001216	-	7:22316446-22332344	2067	0.08401	0.0065873	0.0361865	0.0229156	0	0.0181663
ENSSSCT00000001317	ENSSSCG00000001219	TRIM27	AEMK02000264.1:139242-156795	1923	0.0839501	6.72858e-10	0.0921699	0.0322259	0.0591118	0.0554491
ENSSSCT00000001327	ENSSSCG00000001398	-	7:23645335-23649301	1170	0.857252	1.5544	2.07791	2.74844	3.83969	2.97539
ENSSSCT00000001329	ENSSSCG00000001229	-	7:22888582-22962547	4887	5.87043	4.2951	28.8586	18.6699	6.11743	13.6629
ENSSSCT00000001330	ENSSSCG00000001396	-	7:23622803-23624465	732	2.06346	5.34963	7.49733	6.75876	5.14289	5.67222
ENSSSCT00000001333	ENSSSCG00000030767	SLA-5	7:22851887-22854864	1062	3.42972e-09	7.30702e-08	4.75018e-10	4.89468e-10	1.08373e-09	6.21056e-10
ENSSSCT00000001334	ENSSSCG00000030767	SLA-5	7:22851887-22855142	1017	2.59541e-07	0.000105441	9.63822e-08	9.30441e-08	1.51998e-07	1.07032e-07
ENSSSCT00000001335	ENSSSCG00000030767	SLA-5	7:22851877-22854864	1077	8.4992e-10	7.00086e-09	8.56746e-11	9.01427e-11	2.20138e-10	1.18053e-10
ENSSSCT00000001336	ENSSSCG00000001398	-	7:23635383-23638441	1068	0.965286	2.36214	1.504	2.62989	2.0934	2.24106
ENSSSCT00000001338	ENSSSCG00000001398	-	7:23631151-23649244	897	0.284403	0.261662	0.000206168	0.874888	1.34009	1.23819
ENSSSCT00000001339	ENSSSCG00000001232	-	7:22794608-22805461	1590	0.0172323	0.0175782	0.0322024	0.0611424	0.0369334	0.0323134
ENSSSCT00000001343	ENSSSCG00000001234	TRIM10	7:22718482-22728420	1144	0	1.22816e-06	0.0402701	0.0999613	0.00611123	0.0936892
ENSSSCT00000001345	ENSSSCG00000001235	TRIM15	7:22731975-22742647	1164	5.54294e-06	0.270263	0.276231	0.148568	2.28176e-08	0.0828125
ENSSSCT00000001349	ENSSSCG00000024259	PPP1R11	7:22633899-22636984	1605	7.50357	10.8373	8.75275	12.7215	11.9882	12.7484
ENSSSCT00000001359	ENSSSCG00000001245	ZNRD1	7:22626845-22631557	769	1.81787	2.76015	2.71048	3.58473	4.08112	3.84189
ENSSSCT00000001361	ENSSSCG00000001247	ZFP57	7:22607419-22612064	1825	1.6282	0.860292	1.32683	1.0894	0.776976	0.929517
ENSSSCT00000001362	ENSSSCG00000001248	MOG	7:22595564-22606450	627	0	0	0.0496974	0	0	0
ENSSSCT00000001368	ENSSSCG00000001253	-	7:22498676-22499608	932	0.0318977	0	0	0	0	0
ENSSSCT00000001369	ENSSSCG00000001254	-	7:22459334-22465490	945	0	0	0	0	0.0336851	0
ENSSSCT00000001373	ENSSSCG00000001258	-	AEMK02000453.1:50465-51395	867	0	0	0	0	0.0748273	0.0327295
ENSSSCT00000001457	ENSSSCG00000001341	-	7:23005303-23046804	1403	3.29363	0.425237	0.575788	0.23647	0.492108	0.254641
ENSSSCT00000001458	ENSSSCG00000001342	-	7:23050194-23064498	1638	1.33385	1.78565	1.72897	2.39573	2.59057	2.67294
ENSSSCT00000001460	ENSSSCG00000001372	GNL1	7:23102876-23112158	1914	9.37197e-06	4.06871e-05	0.0995586	0.124817	8.02819e-06	5.70037e-06
ENSSSCT00000001462	ENSSSCG00000001346	ABCF1	7:23126337-23143436	2424	0.97026	2.52118	1.09872	2.65238	2.55434	2.77655
ENSSSCT00000001493	ENSSSCG00000001372	GNL1	7:23102769-23112950	2467	2.12371	4.23307	3.74573	3.88104	3.6034	4.0089
ENSSSCT00000001498	ENSSSCG00000001376	DHX16	7:23186469-23208507	8057	1.13176	1.73113	1.17235	1.92929	2.02733	1.92768
ENSSSCT00000001501	ENSSSCG00000001379	TUBB	7:23248026-23253787	3833	0.129061	0.0582641	0.0667355	0.0639157	0.107648	0.0674737
ENSSSCT00000001504	ENSSSCG00000001382	DDR1	7:23376085-23390712	3110	10.7344	18.9783	15.8429	31.5634	22.8635	27.4586
ENSSSCT00000001505	ENSSSCG00000001383	GTF2H4	7:23398384-23404128	1678	1.03898	1.37425	1.25865	1.90056	1.65248	1.75016
ENSSSCT00000001506	ENSSSCG00000001384	VARS2	7:23405022-23549747	2985	1.35796	2.39791	2.56919	2.35692	2.26991	2.17273
ENSSSCT00000001510	ENSSSCG00000001388	C6orf15	7:23515530-23517110	1348	0	0	0	0.0920255	0	0.0583616
ENSSSCT00000001512	ENSSSCG00000030903	CDSN	7:23521776-23524319	790	0	1.55151e-06	0	1.35021e-06	0.0694692	0.000298512
ENSSSCT00000001514	ENSSSCG00000001391	CCHCR1	7:23544128-23558270	2879	0.0794892	0.227387	0.145228	0.284318	0.224867	0.154183
ENSSSCT00000001516	ENSSSCG00000001393	-	7:23564907-23570600	1083	0	0.0272646	0	0	0	0
ENSSSCT00000001518	ENSSSCG00000001394	-	7:23596300-23609638	1796	2.03364	1.22116	1.91311	1.11871	0.848459	1.24134
ENSSSCT00000001520	ENSSSCG00000001395	-	7:23616983-23621159	944	0.219871	0.144525	0.147308	0.13958	0.0674563	0.118025
ENSSSCT00000001522	ENSSSCG00000001396	-	7:23622447-23628588	4292	0.10103	0.18616	0.755847	0.747696	0.327793	0.493169
ENSSSCT00000001524	ENSSSCG00000024161	-	7:22974216-22976930	1029	0.0837977	0.154224	0.508491	1.07226	0.0967037	0.376064
ENSSSCT00000001525	ENSSSCG00000001398	-	7:23645359-23649269	1081	6.07932e-06	3.94416e-06	0.0600505	0.264562	6.2331e-06	0.0621449
ENSSSCT00000001526	ENSSSCG00000001398	-	7:23645509-23649250	810	4.3049e-10	1.64011e-07	0.0926977	8.1811e-09	0.0994632	0.0825072
ENSSSCT00000001527	ENSSSCG00000001398	-	7:23646089-23649244	1051	0.0374176	0.845413	0.802829	1.77627	1.43446	1.68787
ENSSSCT00000001529	ENSSSCG00000001400	DDX39B	7:23658311-23669155	1581	8.33809	10.613	7.63653	13.1888	15.1987	14.792
ENSSSCT00000001531	ENSSSCG00000001402	NFKBIL1	7:23673940-23685087	1504	3.33244	4.07992	4.44596	3.3919	3.42662	3.75187
ENSSSCT00000001533	ENSSSCG00000001404	TNF	7:23699560-23703534	2881	0.244615	0.166124	0.126697	0.931174	0.174556	0.560008
ENSSSCT00000001535	ENSSSCG00000001405	LTB	7:23703820-23706738	1948	1.50197	0.407472	0.579024	0.57438	0.266094	0.293247
ENSSSCT00000001538	ENSSSCG00000001407	-	7:23713256-23716035	844	0	0	0.0338036	0.0960315	0.077352	0.0676671
ENSSSCT00000001540	ENSSSCG00000001409	PRRC2A	7:23742342-23755885	6503	1.51609	3.193	2.96047	6.71699	6.30351	6.56151
ENSSSCT00000001542	ENSSSCG00000001410	BAG6	7:23756983-23768515	3542	3.16605	4.62559	4.24416	4.69941	5.07597	5.37406
ENSSSCT00000001547	ENSSSCG00000001411	APOM	7:23770895-23774428	1792	0.584931	0.46022	0.226588	0.275351	0.477039	0.282079
ENSSSCT00000001551	ENSSSCG00000001414	-	7:23781802-23785745	323	3.30488e-17	1.66199e-38	7.46015e-44	5.52841e-08	5.42128e-22	1.28039e-18
ENSSSCT00000001555	ENSSSCG00000001418	NEU1	7:23953720-23958659	1935	7.58129	7.07798	7.66053	9.93491	7.71893	9.03073
ENSSSCT00000001556	ENSSSCG00000001419	SLC44A4	7:23959057-23978188	2763	2.99492e-09	1.44084e-09	0.0633794	0.000407747	6.2057e-05	2.24799e-05
ENSSSCT00000001559	ENSSSCG00000001420	EHMT2	7:23978007-23992666	3637	1.7974	2.24996	2.16011	3.36144	3.17344	2.98691
ENSSSCT00000001560	ENSSSCG00000001420	EHMT2	7:23978007-23992666	3535	0.0147314	0.286793	0.117532	0.866933	0.438652	1.00952
ENSSSCT00000001561	ENSSSCG00000001421	ZBTB12	7:23994529-23996980	1947	0.482719	0.801462	0.38624	0.599179	0.723862	0.620405
ENSSSCT00000001563	ENSSSCG00000001422	C2	7:24020322-24034120	2919	1.16748	0.820274	1.0644	1.37704	1.25458	1.28531
ENSSSCT00000001564	ENSSSCG00000024914	-	7:24033586-24040523	3337	0.0956772	0.836367	0.146681	3.08135	0.565648	1.66269
ENSSSCT00000001565	ENSSSCG00000001423	NELFE	7:24040367-24046983	1677	3.27539	6.53464	3.97029	6.42689	4.76066	5.31029
ENSSSCT00000001566	ENSSSCG00000001424	-	7:24046964-24057621	3934	1.95712	4.16541	2.79093	4.81468	4.59818	4.77962
ENSSSCT00000001567	ENSSSCG00000001425	DXO	7:24057669-24060446	1907	1.23227	1.51476	1.47275	1.42091	1.74988	1.57052
ENSSSCT00000001568	ENSSSCG00000001426	STK19	7:24059451-24067398	1883	1.33803	1.93803	1.70106	2.32189	1.80284	1.99129
ENSSSCT00000001570	ENSSSCG00000001427	C4A	7:24068069-24086128	8401	9.54817	17.3629	13.3628	27.6002	27.0823	27.1187
ENSSSCT00000001571	ENSSSCG00000001428	CYP21A2	7:24086257-24089371	2055	0.247122	0.755714	0.376302	1.03774	0.835784	0.865322
ENSSSCT00000001575	ENSSSCG00000001430	ATF6B	7:24161052-24171742	2611	5.87087	8.46595	7.14167	11.3421	8.5707	9.47094
ENSSSCT00000001582	ENSSSCG00000001434	EGFL8	7:24201650-24204978	1298	1.7536	2.38683	1.03288	1.7486	1.43932	1.46234
ENSSSCT00000001585	ENSSSCG00000001436	RNF5	7:24215489-24217983	1255	6.95208	7.28164	8.27339	6.81026	6.68355	6.33281
ENSSSCT00000001586	ENSSSCG00000001437	AGER	7:24217771-24221082	1732	0.219476	0.23981	0.204983	0.361473	0.30233	0.323295
ENSSSCT00000001590	ENSSSCG00000001438	PBX2	7:24222625-24226493	1182	1.97095	2.5235	2.51506	1.97623	2.55168	2.34485
ENSSSCT00000001592	ENSSSCG00000001439	GPSM3	7:24227572-24229776	1527	0.186484	0.317362	0.227656	0.521011	0.298352	0.347342
ENSSSCT00000001593	ENSSSCG00000001440	NOTCH4	7:24231883-24256141	5984	0.516519	1.41348	0.77657	1.13214	1.56239	1.38689
ENSSSCT00000001595	ENSSSCG00000001441	-	7:24274148-24286960	1690	0	0	0	0	0.0172579	0
ENSSSCT00000001598	ENSSSCG00000001444	-	7:24408484-24410008	1524	0	0	0	0	0.0193618	0.0169397
ENSSSCT00000001605	ENSSSCG00000025071	BTNL2	7:24786952-24810227	7345	0.00343192	0	0.00638943	0	0	0
ENSSSCT00000001609	ENSSSCG00000001453	HLA-DRA	7:24825010-24830844	1488	63.9118	51.2382	52.1869	44.6427	55.9289	51.0022
ENSSSCT00000001610	ENSSSCG00000001455	-	7:24882491-24903939	741	0.318444	0.0211206	0.0717121	0.0969821	0.12403	0.0515931
ENSSSCT00000001612	ENSSSCG00000001455	-	7:24901395-24914037	1252	9.97655	7.99905	3.79133	12.278	9.17871	10.9159
ENSSSCT00000001615	ENSSSCG00000001455	-	7:24901387-24913999	1222	0.658993	0.14507	1.71082e-06	0.132375	0.0837921	0.193999
ENSSSCT00000001616	ENSSSCG00000001456	-	7:24953535-24959390	1265	16.3855	21.7962	19.7641	10.6658	11.9994	11.6304
ENSSSCT00000001617	ENSSSCG00000001457	SLA-DQB1	7:24969033-24977270	1226	21.1919	24.6348	16.8046	19.6743	17.5732	19.2994
ENSSSCT00000001618	ENSSSCG00000031336	-	7:24845943-24856905	1170	1.99797e-42	4.14037e-73	5.47366e-47	1.37053e-47	1.94177e-130	2.54166e-57
ENSSSCT00000001619	ENSSSCG00000001459	HLA-DOB	7:25029181-25037892	3117	0.233639	0.0887517	0.0830245	0.153389	0.103813	0.142175
ENSSSCT00000001620	ENSSSCG00000025593	-	7:25045556-25056863	2617	2.43904	3.84328	4.61389	3.47186	3.86543	3.64977
ENSSSCT00000001622	ENSSSCG00000026951	PSMB8	7:25058462-25061488	961	2.33255	3.79732	4.05016	2.94862	1.6832	2.2619
ENSSSCT00000001623	ENSSSCG00000026951	PSMB8	7:25057724-25061533	1810	2.09304	3.90159	4.51167	3.69029	3.79444	3.63897
ENSSSCT00000001625	ENSSSCG00000001463	PSMB9	7:25071711-25077233	1331	5.21262	5.45373	6.12669	3.91543	4.52893	4.15992
ENSSSCT00000001627	ENSSSCG00000001455	-	7:24868655-24914037	1014	1.28691	0.774335	0.45285	1.27428	1.82156	1.71903
ENSSSCT00000001628	ENSSSCG00000001459	HLA-DOB	7:24984833-25037892	771	0.000377661	0.000117559	5.28855e-05	0.0677718	8.55676e-06	7.53284e-05
ENSSSCT00000001629	ENSSSCG00000025593	-	7:25045173-25056292	2932	0.319215	0.543697	0.512815	0.382111	0.267553	0.329999
ENSSSCT00000001630	ENSSSCG00000025618	TAP1	7:25062770-25072038	2922	15.0214	14.6835	15.7347	15.144	12.7061	14.0263
ENSSSCT00000001632	ENSSSCG00000001463	PSMB9	7:25072382-25077233	528	4.09177	2.06509	4.02838	1.68924	1.38735	1.40177
ENSSSCT00000001633	ENSSSCG00000001469	SLA-DMB	7:25119277-25125106	1398	8.47839	6.98694	6.82965	7.64697	5.91009	6.21605
ENSSSCT00000001634	ENSSSCG00000001470	SLA-DMA	7:25133493-25137963	1098	3.22993	3.19243	3.91079	3.14847	3.4094	3.27854
ENSSSCT00000001637	ENSSSCG00000001471	BRD2	7:25150657-25162591	4707	11.1205	22.3743	15.4725	23.9042	22.1833	22.9368
ENSSSCT00000001638	ENSSSCG00000001472	SLA-DOA	7:25178085-25182954	3002	0.832728	0.627339	0.776269	0.599456	0.389941	0.528024
ENSSSCT00000001640	ENSSSCG00000001473	COL11A2	7:25203599-25234702	6940	0.0836198	0.0721017	0.0667622	0.0611554	0.0384583	0.0986784
ENSSSCT00000001642	ENSSSCG00000001474	RXRB	7:25236124-25243176	3127	2.75997	3.57004	2.46127	2.48904	2.43575	2.51503
ENSSSCT00000001644	ENSSSCG00000001475	SLC39A7	7:25242603-25247404	2803	8.2443	11.2444	11.3238	14.0744	14.2045	14.3904
ENSSSCT00000001647	ENSSSCG00000001476	HSD17B8	7:25247612-25249786	984	4.86032	9.40094	8.19854	4.84226	6.37405	4.3599
ENSSSCT00000001648	ENSSSCG00000001477	RING1	7:25251819-25256223	2236	4.04086	5.55613	5.40033	5.53132	5.79307	5.67376
ENSSSCT00000001649	ENSSSCG00000001478	BMP5	7:25345435-25468313	1170	0	0.0104841	0	1.46657e-05	0.0273541	0.0203844
ENSSSCT00000001650	ENSSSCG00000001479	HMGCLL1	7:25596715-25735630	3591	0.0107779	0.021465	2.12847e-08	0.0254606	0.0228441	0.0259687
ENSSSCT00000001651	ENSSSCG00000001480	GFRAL	7:25751184-25802232	1197	0	0	0	0.0210873	0	0.0222887
ENSSSCT00000001655	ENSSSCG00000001483	FAM83B	7:26058143-26141831	7334	0.295598	0.433768	0.460745	0.998151	0.444819	0.72053
ENSSSCT00000001657	ENSSSCG00000001485	MLIP	7:26599358-26700024	2796	0	7.97517e-09	0	0	2.77036e-34	3.77361e-44
ENSSSCT00000001658	ENSSSCG00000001486	LRRC1	7:26860139-26989670	3135	8.67609	9.55449	8.98298	6.1742	7.78692	7.03057
ENSSSCT00000001659	ENSSSCG00000001487	KLHL31	7:27062043-27106117	6709	0	0.0114964	0.0140209	0	0.0080543	0.00704746
ENSSSCT00000001660	ENSSSCG00000001488	GCLC	7:27209564-27253530	3999	1.50757	2.78584	0.781154	6.03138	3.74684	5.12163
ENSSSCT00000001665	ENSSSCG00000001493	PRIM2	7:28274626-28549687	1875	0.269891	0.638747	0.823589	1.23087	0.625572	0.657133
ENSSSCT00000001669	ENSSSCG00000001497	ZNF451	7:28680548-28765600	7051	0.528447	0.76017	0.753538	0.535653	0.447109	0.506282
ENSSSCT00000001670	ENSSSCG00000001498	BEND6	7:28769896-28811943	2459	0.117941	0.23778	7.60123e-05	0.275563	0.309876	0.311356
ENSSSCT00000001671	ENSSSCG00000001499	DST	7:28920671-29299171	22797	4.20682e-05	0.46347	0.219781	0.0877171	0.0730762	0.150275
ENSSSCT00000001673	ENSSSCG00000001500	-	7:29398379-29494038	2067	0.0582085	1.41223e-05	0.0855772	0.454259	0.217502	0.238814
ENSSSCT00000001674	ENSSSCG00000001501	VPS52	7:29624231-29638466	2632	3.98588	6.25913	5.48582	6.22639	6.97589	6.46103
ENSSSCT00000001675	ENSSSCG00000001502	RPS18	7:29638832-29642912	544	337.625	413.6	337.39	356.117	362.642	364.297
ENSSSCT00000001676	ENSSSCG00000001503	B3GALT4	7:29643176-29644845	1562	2.56612	3.92667	3.84322	2.82204	2.97611	2.5379
ENSSSCT00000001677	ENSSSCG00000001504	WDR46	7:29645128-29657397	4881	0.752558	1.57696	1.17854	1.4988	1.57791	1.54122
ENSSSCT00000001678	ENSSSCG00000001505	-	7:29653671-29655103	751	3.9992	8.25347	7.34267	5.40271	6.4137	5.23078
ENSSSCT00000001679	ENSSSCG00000001506	RGL2	7:29655746-29662710	2759	5.24684	7.25622	7.05025	5.28664	5.81295	5.85304
ENSSSCT00000001680	ENSSSCG00000001507	TAPBP	7:29663494-29672681	1857	1.50593	2.84285	3.07743	3.5172	3.45878	3.39294
ENSSSCT00000001682	ENSSSCG00000001509	DAXX	7:29676857-29681110	2687	2.1875e-05	2.92509e-05	2.58899e-05	3.66057e-05	2.19401e-05	5.28447e-05
ENSSSCT00000001683	ENSSSCG00000001510	KIFC1	7:29694767-29759744	2350	0.103992	0.000174516	0.141235	0.191661	0.335151	0.356631
ENSSSCT00000001684	ENSSSCG00000001511	PHF1	7:29715108-29722010	4559	1.08085	1.06028	1.0195	0.684693	1.36822	1.02031
ENSSSCT00000001685	ENSSSCG00000001512	CUTA	7:29720092-29722010	1073	3.86376	7.05585	4.34054	5.34538	6.15321	5.96359
ENSSSCT00000001686	ENSSSCG00000001513	SYNGAP1	7:29723787-29752217	3972	0.0356631	0.0362969	0.135824	6.13424e-05	0.21832	9.36802e-05
ENSSSCT00000001689	ENSSSCG00000001516	BAK1	7:29807010-29815191	3888	0.836095	1.58518	0.796361	1.7029	0.854356	1.32817
ENSSSCT00000001690	ENSSSCG00000001517	-	7:29816541-29819414	963	1.01205	0.940618	0.949069	0.626835	0.559772	0.720153
ENSSSCT00000001691	ENSSSCG00000001518	ITPR3	7:29835868-29902160	10218	1.25773	3.19832	1.57434	5.63427	3.89867	4.875
ENSSSCT00000001693	ENSSSCG00000001520	LEMD2	7:29984174-29997101	1468	0.831983	0.568208	0.269509	0.264344	0.867951	0.542667
ENSSSCT00000001702	ENSSSCG00000001527	C6orf106	7:30564852-30666956	650	4.25677	4.51601	2.9789	2.77265	4.15133	4.50128
ENSSSCT00000001703	ENSSSCG00000001528	RPS10	7:30435145-30442712	1406	131.838	144.914	138.245	120.81	126.599	123.336
ENSSSCT00000001706	ENSSSCG00000001531	-	7:30708301-30723475	777	6.67582	10.7293	7.26691	9.53477	9.32789	9.5273
ENSSSCT00000001707	ENSSSCG00000001532	UHRF1BP1	7:30731578-30958640	5718	0.698164	1.28731	0.752808	1.23184	0.903761	1.04835
ENSSSCT00000001708	ENSSSCG00000001533	TAF11	7:30799964-30812120	1818	1.91749	3.44056	2.31791	3.42701	2.73887	3.14864
ENSSSCT00000001709	ENSSSCG00000001534	ANKS1A	7:30813090-30993205	3558	0.292227	0.396104	0.230361	0.530732	0.812826	0.555948
ENSSSCT00000001710	ENSSSCG00000001535	TCP11	7:31007464-31034067	3094	0.0251578	0.00850448	0	0	0	0
ENSSSCT00000001711	ENSSSCG00000001536	SCUBE3	7:31128476-31150000	4120	0.123932	0.26317	0.191218	0.404252	0.24683	0.372033
ENSSSCT00000001712	ENSSSCG00000001537	ZNF76	7:31160647-31191574	2539	0.851422	1.23291	1.06661	0.902368	0.824643	0.794358
ENSSSCT00000001713	ENSSSCG00000001538	DEF6	7:31161363-31216414	6648	0.0467799	0.0799043	0.0599223	0.127403	0.162642	0.173315
ENSSSCT00000001714	ENSSSCG00000001539	PPARD	7:31222531-31295210	3455	0.19729	0.139216	0.452929	1.02414	0.66323	0.400426
ENSSSCT00000001720	ENSSSCG00000001543	-	7:31328387-31330589	533	136.642	195.052	123.452	129.293	141.424	134.876
ENSSSCT00000001722	ENSSSCG00000001544	TEAD3	7:31337889-31351452	1307	1.50358	3.00392	1.9691	5.71928	4.79071	5.05779
ENSSSCT00000001724	ENSSSCG00000001546	-	7:31313147-31326141	1859	0.15297	0.0834358	7.24239e-07	0.205519	0.0392561	0.147711
ENSSSCT00000001727	ENSSSCG00000001549	FKBP5	7:31443340-31550604	1793	0.569112	2.20051	0.968519	0.89808	1.60957	1.34254
ENSSSCT00000001728	ENSSSCG00000001550	ARMC12	7:31592084-31601773	1044	0	0.0569429	0.026108	0.099001	0.0598054	0.104641
ENSSSCT00000001732	ENSSSCG00000001554	SRPK1	7:31648014-31685166	1941	0.687546	1.18632	1.31172	1.57546	1.05936	1.23003
ENSSSCT00000001733	ENSSSCG00000001555	SLC26A8	7:31722890-31779819	2988	0.06102	6.59363e-07	0.0561941	0.0386147	0.0373206	0.0244771
ENSSSCT00000001734	ENSSSCG00000001556	MAPK14	7:31791593-31862031	4313	7.98523	9.62555	8.72785	11.2373	11.4055	11.5517
ENSSSCT00000001738	ENSSSCG00000001559	PNPLA1	7:31988395-32025245	1401	0	0.0405233	0.0185642	0.0176177	0.0212844	0
ENSSSCT00000001739	ENSSSCG00000001560	C6orf222	7:32035346-32054632	3310	0	0	2.01156e-274	1.72651e-317	0	6.94207e-267
ENSSSCT00000001740	ENSSSCG00000001561	ETV7	7:32089699-32108185	1375	0.0945694	0.0856055	0.0758549	0.0815003	0.0540944	0.0446828
ENSSSCT00000001741	ENSSSCG00000001562	KCTD20	7:32146112-32192508	1956	0.717404	1.93304	1.37856	2.31662	1.33764	2.1137
ENSSSCT00000001742	ENSSSCG00000001563	STK38	7:32206535-32253679	3619	2.60469	3.39555	2.81709	4.04239	3.89206	4.2046
ENSSSCT00000001743	ENSSSCG00000001564	SRSF3	7:32289459-32302716	2575	4.1033	7.89354	4.21697	9.06351	8.92775	8.6145
ENSSSCT00000001744	ENSSSCG00000001565	CDKN1A	7:32359454-32362271	474	2.81691	5.32226	2.52759	6.85909	5.83636	6.36161
ENSSSCT00000001745	ENSSSCG00000001566	RAB44	7:32372458-32401798	3229	0	0	0.00748697	0	0.051579	6.79201e-05
ENSSSCT00000001746	ENSSSCG00000001567	CPNE5	7:32398572-32508111	2097	0.0127242	0.0389105	0	0.0235766	0.0272544	0.0357688
ENSSSCT00000001749	ENSSSCG00000001570	PI16	7:32600964-32610739	1385	7.03966	14.1636	6.69557	20.4719	12.4634	17.0919
ENSSSCT00000001750	ENSSSCG00000001571	-	7:32617425-32635580	1995	11.2152	17.8274	17.3761	16.8973	16.968	17.3695
ENSSSCT00000001751	ENSSSCG00000001572	FGD2	7:32648268-32674541	2434	1.03154	1.0452	0.795072	0.895225	0.90557	0.933675
ENSSSCT00000001752	ENSSSCG00000001573	PIM1	7:32788004-32793881	2995	1.86087	1.91324	2.20487	1.51005	1.94522	1.71828
ENSSSCT00000001756	ENSSSCG00000001577	TBC1D22B	7:32839172-32914495	3558	1.13329	1.57813	1.29162	2.1715	1.7882	1.87991
ENSSSCT00000001757	ENSSSCG00000001578	RNF8	7:32931854-32969533	1933	2.05267	1.8187	1.93886	1.41358	1.73623	1.27174
ENSSSCT00000001758	ENSSSCG00000001579	CMTR1	7:33000552-33063383	3185	4.07485	5.22115	4.33736	4.93852	4.97167	5.00637
ENSSSCT00000001762	ENSSSCG00000001582	MDGA1	7:33205703-33268272	7578	0.00664829	0	0	0	0.0142209	0.00933245
ENSSSCT00000001768	ENSSSCG00000001588	DNAH8	7:34198166-34479492	14076	5.62054e-06	5.739e-06	0.0395701	0.0156852	0.036001	0.0298402
ENSSSCT00000001769	ENSSSCG00000001589	GLP1R	7:34497758-34534612	1688	5.93508	5.29647	2.77192	1.91671	5.04591	3.31107
ENSSSCT00000001774	ENSSSCG00000001594	-	7:34918892-35018856	1212	0	0.071736	0.0876675	0.0207895	0	0.021974
ENSSSCT00000001775	ENSSSCG00000001595	DAAM2	7:35159048-35283324	3882	7.4467e-05	1.43916	0.825269	0.206599	1.20415	0.844009
ENSSSCT00000001776	ENSSSCG00000001596	-	7:35286576-35320931	2797	17.6028	23.4752	16.5779	16.3181	21.4544	18.728
ENSSSCT00000001777	ENSSSCG00000001597	LRFN2	7:35724105-35915032	3221	0.00805389	0.008203	0.0150132	0.00713508	0.0172391	0.0226255
ENSSSCT00000001780	ENSSSCG00000001611	NFYA	7:36387611-36409490	4411	0.544659	0.396643	0.313151	0.794406	1.13297	0.884708
ENSSSCT00000001790	ENSSSCG00000023366	OARD1	7:36379545-36385771	2395	0.273106	1.77885e-05	0.368621	7.86856e-06	0.295499	0.196212
ENSSSCT00000001791	ENSSSCG00000001611	NFYA	7:36386631-36409479	3894	0.117001	0.415746	0.0928738	0.335785	0.489422	0.542854
ENSSSCT00000001792	ENSSSCG00000001612	-	7:36430572-36453132	5713	0.0475955	0.0459919	0.0259517	0.0488255	2.05947e-07	0.0229179
ENSSSCT00000001793	ENSSSCG00000001613	TREML1	7:36455602-36460715	1255	0	0.0229705	0	0	0.0241284	0
ENSSSCT00000001800	ENSSSCG00000001619	FOXP4	7:36741882-36791064	2864	0.638171	1.53434	1.19845	3.88077	2.56875	3.23102
ENSSSCT00000001801	ENSSSCG00000001620	MDFI	7:36830392-36847455	2265	0.314447	0.182281	0.0708432	0.0668421	3.15772e-06	0.0679088
ENSSSCT00000001802	ENSSSCG00000001621	TFEB	7:36870241-36920842	2334	1.026	1.05091	0.529435	1.23464	0.807766	0.917194
ENSSSCT00000001804	ENSSSCG00000034190	-	7:36969448-36976182	1386	0.0913929	0.182653	0.121667	0.121656	0.194259	0.0422604
ENSSSCT00000001806	ENSSSCG00000001624	FRS3	7:36959467-36967529	2077	0.115715	0.144163	0.0839935	0.0455918	0.0550787	0.0361428
ENSSSCT00000001807	ENSSSCG00000001625	PGC	7:36922270-36951349	1587	0.017242	0	0	0	0.0184781	0
ENSSSCT00000001808	ENSSSCG00000001621	TFEB	7:36870863-36921057	1825	0.000174945	0.0963642	0.0965691	3.28331e-05	0.363881	0.211525
ENSSSCT00000001810	ENSSSCG00000034190	-	7:36970280-36978281	2648	4.70011	7.8624	7.74015	4.60239	6.98643	5.27941
ENSSSCT00000001812	ENSSSCG00000001629	USP49	7:36984363-36994759	2049	0.469717	0.731518	0.560163	0.427982	0.475117	0.489056
ENSSSCT00000001816	ENSSSCG00000001633	-	7:37281045-37281420	375	0.228141	0.118276	0.109453	0.102535	0	0.108364
ENSSSCT00000001820	ENSSSCG00000001636	GUCA1A	7:37282699-37296717	1775	1.92156e-26	1.37625e-05	0.0142441	1.44822e-18	0.0326886	9.01681e-12
ENSSSCT00000001821	ENSSSCG00000001637	GUCA1B	7:37299019-37310170	591	0	0.117202	0.0539019	0	0.123004	0
ENSSSCT00000001822	ENSSSCG00000001638	MRPS10	7:37317991-37329187	1778	6.26014	7.62624	4.6228	7.13175	5.95604	6.496
ENSSSCT00000001823	ENSSSCG00000001639	TRERF1	7:37333951-37380195	6740	0.0239376	0.0439823	0.033874	0.0641453	0.0238023	0.0557114
ENSSSCT00000001825	ENSSSCG00000001641	UBR2	7:37655732-37782870	5617	2.66597	2.05718	2.19048	1.80531	2.51155	2.41021
ENSSSCT00000001826	ENSSSCG00000026741	TBCC	7:37822763-37823994	1231	5.77357	8.52564	6.65155	7.02444	6.34025	6.75559
ENSSSCT00000001830	ENSSSCG00000001646	BICRAL	7:37881950-37933661	6413	1.40691	1.50625	1.06934	1.70518	1.41226	1.7037
ENSSSCT00000001835	ENSSSCG00000001650	PTCRA	7:38006160-38011837	738	0	0	0	0.189517	0.0457975	0.160246
ENSSSCT00000001836	ENSSSCG00000001651	CNPY3	7:38014750-38026454	3941	5.69257	5.49105	7.27792	5.82757	6.57947	6.25138
ENSSSCT00000001838	ENSSSCG00000001653	PEX6	7:38039861-38052369	3623	1.31799	1.38558	1.59933	2.06864	1.3479	1.53506
ENSSSCT00000001840	ENSSSCG00000001654	PPP2R5D	7:38055573-38079867	4581	0.328878	0.242527	0.208847	9.43771e-05	1.28198e-06	6.48335e-05
ENSSSCT00000001841	ENSSSCG00000001655	-	7:38077891-38080229	1319	3.78966	4.22809	4.58527	4.43298	3.32878	3.61808
ENSSSCT00000001845	ENSSSCG00000022901	KLHDC3	7:38080041-38086605	2143	0.23431	0.243594	0.143725	0.296776	0.401826	0.364952
ENSSSCT00000001846	ENSSSCG00000001656	RRP36	7:38087257-38094548	3023	2.66069	2.85054	2.41604	2.09032	2.3409	2.24174
ENSSSCT00000001847	ENSSSCG00000001657	CUL7	7:38097854-38115471	5208	1.24105	1.31632	1.29871	1.08862	0.737561	0.923812
ENSSSCT00000001849	ENSSSCG00000001658	MRPL2	7:38116176-38120862	1074	6.71992	8.47157	7.99432	7.25599	6.67574	6.2696
ENSSSCT00000001850	ENSSSCG00000001659	KLC4	7:38120788-38134532	2631	0.575084	2.02376	1.22439	2.52935	1.41481	2.31887
ENSSSCT00000001851	ENSSSCG00000001660	PTK7	7:38135876-38208138	6541	2.23302	4.75252	2.36629	4.93767	3.0821	3.92928
ENSSSCT00000001852	ENSSSCG00000001661	SRF	7:38213062-38223384	4167	1.59363	2.14888	1.58202	2.65943	2.20544	2.51151
ENSSSCT00000001854	ENSSSCG00000026568	DNPH1	7:38263499-38266688	902	0.597336	0.848545	1.27681	1.53405	1.42573	1.21607
ENSSSCT00000001855	ENSSSCG00000001664	TTBK1	7:38276277-38316610	4220	0.00607273	0.0247324	0.0226264	0.0514601	0.045482	0.0397956
ENSSSCT00000001859	ENSSSCG00000001667	ZNF318	7:38359504-38389113	7538	3.9237	3.44559	2.79686	3.06846	2.84174	2.88998
ENSSSCT00000001865	ENSSSCG00000001672	-	7:38335153-38339054	633	0	3.86882e-07	0	0	0	0
ENSSSCT00000001869	ENSSSCG00000001688	TJAP1	7:38487847-38501526	3301	0.705216	0.95879	0.484641	0.945773	0.939755	1.00003
ENSSSCT00000001870	ENSSSCG00000001676	LRRC73	7:38501969-38504718	1204	0.023901	0.0977623	0.066692	0.147237	0.177974	0.132856
ENSSSCT00000001874	ENSSSCG00000001679	XPO5	7:38532877-38569373	3573	4.94407	7.35166	5.4946	8.29578	8.99174	8.92316
ENSSSCT00000001875	ENSSSCG00000001680	ABCC10	7:38432731-38452686	4934	1.45073	1.50696	1.88093	2.31833	1.47575	1.51974
ENSSSCT00000001877	ENSSSCG00000001682	DLK2	7:38452802-38458230	2060	3.02481e-06	0.0793367	0.193705	0.241499	0.0694623	0.243108
ENSSSCT00000001878	ENSSSCG00000001682	DLK2	7:38452802-38458230	2520	0.0626674	2.04827e-06	2.03522e-06	1.72315e-06	2.23705e-06	1.74341e-06
ENSSSCT00000001879	ENSSSCG00000001683	POLH	7:38569819-38601648	3253	0.00607511	6.37988e-06	1.00718e-05	9.16754e-17	2.53181e-13	6.97275e-26
ENSSSCT00000001884	ENSSSCG00000001688	TJAP1	7:38486619-38501526	2712	0.454015	0.757104	0.60233	1.01624	0.75318	0.935191
ENSSSCT00000001886	ENSSSCG00000001689	GTPBP2	7:38604592-38614715	1818	0.250952	0.222564	0.314341	2.61795e-05	0.111886	0.0892839
ENSSSCT00000001888	ENSSSCG00000001691	RSPH9	7:38625854-38642422	1910	0.154917	0.143585	0.0657386	0.174818	0.16594	0.184782
ENSSSCT00000001889	ENSSSCG00000001692	MRPS18A	7:38641029-38657080	1571	8.29547	10.3151	8.86113	10.1626	9.07715	9.53002
ENSSSCT00000001892	ENSSSCG00000001695	VEGFA	7:38746054-38762342	3599	3.76421	3.53957	3.16299	4.19302	3.96963	4.01628
ENSSSCT00000001895	ENSSSCG00000001696	-	7:39125170-39138419	696	2.63184	5.09336	4.61632	3.2304	2.28076	2.7072
ENSSSCT00000001896	ENSSSCG00000001697	TMEM63B	7:39138395-39166617	4806	0.18843	0.217855	0.15809	0.232805	0.217993	0.30861
ENSSSCT00000001897	ENSSSCG00000001698	CAPN11	7:39171656-39191007	1860	0.0289946	0.0443447	0	0.0128547	0.0310595	0.0271748
ENSSSCT00000001899	ENSSSCG00000001700	SLC29A1	7:39221832-39233116	2112	6.71595	5.27846	6.00254	7.98773	9.50984	8.71808
ENSSSCT00000001901	ENSSSCG00000001701	HSP90AB1	7:39243586-39254002	6395	6.84386e-06	1.08646e-05	3.81516e-05	1.79689e-05	1.93252e-05	1.57432e-05
ENSSSCT00000001902	ENSSSCG00000001702	SLC35B2	7:39249454-39254504	3676	14.2203	17.2159	15.0993	17.5217	19.8089	18.7307
ENSSSCT00000001903	ENSSSCG00000001703	NFKBIE	7:39255074-39263367	2454	3.25584	7.08412	2.57576	7.74219	4.11859	5.83818
ENSSSCT00000001906	ENSSSCG00000001706	AARS2	7:39301060-39313704	3356	0.476008	0.642317	0.71195	1.40938	1.40491	1.41759
ENSSSCT00000001908	ENSSSCG00000001708	CDC5L	7:39384391-39430143	5445	8.37449	9.02813	8.67148	8.44023	8.91346	8.56773
ENSSSCT00000001909	ENSSSCG00000001709	SUPT3H	7:39762106-40161128	4191	0.813482	1.32026	1.22502	1.37055	1.40046	1.33417
ENSSSCT00000001910	ENSSSCG00000001710	RUNX2	7:40205911-40349398	1281	0.174286	0.0580535	1.92038e-31	0.0831205	0.101218	0.0521245
ENSSSCT00000001913	ENSSSCG00000025788	ENPP4	7:40897039-40909393	1461	1.47688	2.19151	1.456	1.83343	2.29055	2.02385
ENSSSCT00000001917	ENSSSCG00000001715	ENPP5	7:40920029-40936567	4342	0.212241	0.514154	0.153741	0.488367	0.292037	0.435732
ENSSSCT00000001918	ENSSSCG00000001716	RCAN2	7:40979765-41090808	3190	8.38468e-05	8.72584e-05	5.45673e-05	0.244797	9.09004e-05	8.11376e-05
ENSSSCT00000001920	ENSSSCG00000001718	CYP39A1	7:41344803-41426023	2438	13.9803	17.6876	10.8855	14.2766	11.9029	13.366
ENSSSCT00000001922	ENSSSCG00000001718	CYP39A1	7:41345550-41426343	1903	0.344675	0.187232	0.977062	0.261615	0.211814	0.307443
ENSSSCT00000001923	ENSSSCG00000001720	SLC25A27	7:41426198-41450139	3897	1.70685	6.62959	6.00227	3.9245	5.52569	4.69979
ENSSSCT00000001927	ENSSSCG00000001723	PLA2G7	7:41487663-41531345	2164	4.82038e-06	0.172547	6.58492e-06	0.0932803	0.0262378	0.0847803
ENSSSCT00000001928	ENSSSCG00000001724	MEP1A	7:41587748-41625017	3057	0.0160154	0.016882	0.0039887	0.0313189	0.0286819	0.0334128
ENSSSCT00000001929	ENSSSCG00000001725	-	7:41640262-41729027	5901	5.22267	5.46905	3.59113	5.36607	7.76874	6.31519
ENSSSCT00000001930	ENSSSCG00000001726	ADGRF1	7:41803837-41853917	5949	1.22768	0.877161	2.36157	1.7575	1.25529	1.4918
ENSSSCT00000001932	ENSSSCG00000030197	CD2AP	7:42241253-42329462	1926	7.26442	7.61355	5.80426	7.50025	4.38022	5.7876
ENSSSCT00000001933	ENSSSCG00000001729	PTCHD4	7:42572970-42770559	3382	0.0153032	0.0155855	0.00713084	0.0135566	0.00818854	0.00716473
ENSSSCT00000001935	ENSSSCG00000001731	CENPQ	7:43624804-43640014	2646	0.744759	0.533224	0.669723	0.103542	0.415353	0.318733
ENSSSCT00000001937	ENSSSCG00000001732	MUT	7:43597894-43620316	2252	4.99346	5.18845	6.79297	3.9748	3.92571	4.15855
ENSSSCT00000001939	ENSSSCG00000001734	-	7:43669510-43674357	1294	0.282434	0.42139	0.203244	1.44624	0.722202	0.998718
ENSSSCT00000001940	ENSSSCG00000001735	RHAG	7:43701205-43719512	1320	0	0.0433601	0.0198667	0	0.0227736	0
ENSSSCT00000001941	ENSSSCG00000001736	CRISP2	7:43751181-43770004	1281	0	0.0673073	0	0	0.0235658	0.0206173
ENSSSCT00000001956	ENSSSCG00000001750	PAQR8	7:46104945-46233280	5304	0.164659	0.195176	0.303527	0.381664	0.266634	0.306792
ENSSSCT00000001957	ENSSSCG00000001751	CHRNA5	7:47384160-47424836	1444	0.01919	0	0.0358797	0.0170267	0	0.0179969
ENSSSCT00000001958	ENSSSCG00000001752	CHRNA3	7:47361771-47382740	3912	0.117849	0.0597299	0.0240113	0.151678	0.167708	0.124427
ENSSSCT00000001959	ENSSSCG00000001753	CHRNB4	7:47339128-47358267	1392	0.103922	0.000155983	0.224339	0.000553704	0.771386	0.003225
ENSSSCT00000001961	ENSSSCG00000001755	HYKK	7:47451816-47474694	2419	0.661827	0.435384	0.922414	0.496993	0.589874	0.435023
ENSSSCT00000001962	ENSSSCG00000001756	IREB2	7:47481538-47529187	3463	5.79954	6.56006	5.57845	6.33427	6.27026	5.89165
ENSSSCT00000001963	ENSSSCG00000001757	WDR61	7:47641146-47661931	2478	4.99804	6.18175	5.81218	4.91634	4.82164	4.94589
ENSSSCT00000001964	ENSSSCG00000027477	TBC1D2B	7:47839078-47924212	2705	0.677614	0.733025	0.471801	1.32653	1.02062	0.948194
ENSSSCT00000001965	ENSSSCG00000037646	DNAJA4	7:47659071-47675058	4422	0.0129516	0.20414	0.146268	0.163093	3.19208e-05	0.132391
ENSSSCT00000001967	ENSSSCG00000001760	ACSBG1	7:47727092-47758526	2239	0	3.08854e-09	0	0	5.14924e-09	5.38679e-09
ENSSSCT00000001968	ENSSSCG00000001760	ACSBG1	7:47705085-47762544	6187	0.0163648	0.0707911	0.0495181	0.0724499	0.0700172	0.0765806
ENSSSCT00000001970	ENSSSCG00000001762	CIB2	7:47788917-47812748	546	2.03835	3.14327	3.85766	1.93337	2.19887	1.74288
ENSSSCT00000001973	ENSSSCG00000001764	SH2D7	7:47812402-47825045	4441	0.59321	0.492551	0.82615	0.52537	0.449813	0.555323
ENSSSCT00000001974	ENSSSCG00000001765	ADAMTS7	7:47929032-47994484	5464	0.339358	0.856515	0.419898	2.85684	1.03435	1.89277
ENSSSCT00000001981	ENSSSCG00000001769	MORF4L1	7:48050142-48075794	1906	2.20682	2.0321	1.4139	1.35888	2.20201	1.89442
ENSSSCT00000001983	ENSSSCG00000001770	CTSH	7:48083571-48106074	2737	17.0831	19.202	26.0501	14.6609	14.2378	15.0787
ENSSSCT00000001985	ENSSSCG00000001770	CTSH	7:48085176-48105979	943	18.1831	18.5756	25.5583	12.8262	9.40786	10.5771
ENSSSCT00000001986	ENSSSCG00000001771	RASGRF1	7:48118208-48246288	8256	0	6.79667e-05	6.29629e-05	0	7.16253e-05	6.2672e-05
ENSSSCT00000001988	ENSSSCG00000001773	TMED3	7:48431635-48442611	1751	2.04465	2.19566	2.74858	4.13473	2.1076	3.13622
ENSSSCT00000001990	ENSSSCG00000001775	KIAA1024	7:48500249-48536378	2979	0	1.16115e-14	0	0	0.00780168	0.00682618
ENSSSCT00000001991	ENSSSCG00000001776	-	7:48560860-48562039	1179	0.120874	0.0246886	0	0.0643925	0.0518641	0.0907484
ENSSSCT00000001994	ENSSSCG00000001779	ZFAND6	7:48978996-49034715	1502	10.6998	10.0755	9.33703	8.92684	7.48341	8.49673
ENSSSCT00000001995	ENSSSCG00000001780	FAH	7:49047982-49087783	1647	3.30617	2.80591	5.5889	1.05831	1.14537	0.963263
ENSSSCT00000001996	ENSSSCG00000040288	ARNT2	7:49259596-49446333	2167	0.0294758	2.79576e-14	4.3321e-19	0.0794184	0.00696998	0.0389364
ENSSSCT00000002001	ENSSSCG00000001786	CFAP161	7:49927238-49940764	1844	8.61998	6.92392	13.7535	4.52899	6.88242	5.85701
ENSSSCT00000002002	ENSSSCG00000001787	IL16	7:49973464-50102059	4991	0.401219	0.237027	0.248466	0.680185	0.547725	0.544567
ENSSSCT00000002003	ENSSSCG00000001788	STARD5	7:50107033-50118629	1212	0.51518	1.64993	0.635589	1.87105	1.23072	1.45028
ENSSSCT00000002005	ENSSSCG00000001789	TMC3	7:50128521-50183942	3291	0	0.0240583	0.0146768	0	0	0
ENSSSCT00000002008	ENSSSCG00000001792	EFL1	7:50839702-50977024	3667	3.59167	6.68104	5.53175	7.22979	6.10836	6.39505
ENSSSCT00000002009	ENSSSCG00000001793	ADAMTSL3	7:51008330-51363704	5090	0.019295	0.265744	0.0617615	0.425705	0.255188	0.20918
ENSSSCT00000002011	ENSSSCG00000001795	SH3GL3	7:51381542-51540296	1283	0	0.0860626	0	3.50036e-07	0.0235252	4.27677e-07
ENSSSCT00000002016	ENSSSCG00000001800	TM6SF1	7:51816452-51844940	1331	7.00067e-28	0.0918662	0.0715258	0.237105	0.370998	0.284452
ENSSSCT00000002017	ENSSSCG00000001801	BTBD1	7:51877454-51926239	3563	2.99932	4.72185	2.5046	3.99932	3.73339	3.69284
ENSSSCT00000002020	ENSSSCG00000001804	HOMER2	7:52055117-52095361	1824	0.728228	0.0327549	0.0521621	0.634958	0.546844	0.68026
ENSSSCT00000002021	ENSSSCG00000001805	WHAMM	7:52108868-52140409	3114	1.89443	2.0996	1.78139	1.56747	1.96505	1.8991
ENSSSCT00000002022	ENSSSCG00000001806	FSD2	7:52144505-52194133	3130	0.14111	0.177546	0.038685	0.125016	0.133258	0.139916
ENSSSCT00000002023	ENSSSCG00000001807	AP3B2	7:52256568-52296717	6283	2.38285e-05	0.00948366	0.0187455	0.0285254	0.030149	0.0301516
ENSSSCT00000002024	ENSSSCG00000001808	CPEB1	7:52304846-52383732	3184	1.16715e-12	6.64419e-05	1.41416e-07	1.79422e-07	9.72234e-05	3.13916e-07
ENSSSCT00000002025	ENSSSCG00000001808	CPEB1	7:52303664-52382408	2231	0.000212198	2.77925e-21	3.17579e-05	1.02127e-06	7.32436e-48	8.3416e-13
ENSSSCT00000002027	ENSSSCG00000001810	-	7:52411981-52556789	2457	0.573705	1.09156	1.0355	1.29889	0.839642	1.02832
ENSSSCT00000002028	ENSSSCG00000001808	CPEB1	7:52304471-52383732	3096	1.57072e-10	0.222684	0.0938986	1.1615e-06	0.0786099	1.60343e-06
ENSSSCT00000002031	ENSSSCG00000001810	-	7:52411981-52556789	2376	0.416473	0.286139	6.82576e-05	0.495561	0.186262	0.308822
ENSSSCT00000002032	ENSSSCG00000001810	-	7:52410778-52556923	3851	1.61713	2.59101	1.78326	2.07172	2.76805	2.4832
ENSSSCT00000002033	ENSSSCG00000001814	IQGAP1	7:53020508-53130721	7355	24.5865	32.2537	24.7466	27.5958	25.6594	26.1705
ENSSSCT00000002034	ENSSSCG00000001816	BLM	7:53319105-53416519	8483	1.46191e-06	7.45753e-10	2.04683e-06	6.20368e-08	2.2082e-06	8.5634e-07
ENSSSCT00000002035	ENSSSCG00000001816	BLM	7:53317539-53412647	4707	0.412707	0.342268	0.381684	0.416872	0.469486	0.428687
ENSSSCT00000002036	ENSSSCG00000001817	FURIN	7:53459234-53472785	4184	4.53173	7.16912	3.09619	7.42775	6.89202	7.41968
ENSSSCT00000002037	ENSSSCG00000001818	FES	7:53472946-53485082	3492	3.29259	2.01944	3.21998	2.69385	2.8109	2.70194
ENSSSCT00000002038	ENSSSCG00000001819	MAN2A2	7:53498908-53520696	7124	1.16032	1.7158	0.968244	2.52604	2.13097	2.16528
ENSSSCT00000002039	ENSSSCG00000001820	HDDC3	7:53523731-53527923	3490	1.65527	2.12518	2.02596	1.6059	1.61848	1.70299
ENSSSCT00000002040	ENSSSCG00000001821	UNC45A	7:53530937-53545958	3259	3.60289	5.41857	4.14798	5.47383	4.7191	5.11766
ENSSSCT00000002041	ENSSSCG00000001822	RCCD1	7:53547057-53557863	2942	0.779767	0.758219	0.55399	0.96569	0.863487	0.85476
ENSSSCT00000002042	ENSSSCG00000001823	UROC1	7:53605997-53633351	1923	0.0227351	0	0	0	0	0
ENSSSCT00000002043	ENSSSCG00000001824	ZXDC	7:53640395-53671398	2247	1.79745	2.26733	2.52943	2.51431	2.29694	2.12295
ENSSSCT00000002044	ENSSSCG00000001825	SLC41A3	7:53673263-53741421	1692	3.61751e-42	4.45179e-18	1.66003e-15	3.47042e-16	0.032244	0.030931
ENSSSCT00000002046	ENSSSCG00000001826	-	7:53909424-53949628	2182	0.945485	0.665113	0.698005	0.532598	0.424921	0.479568
ENSSSCT00000002051	ENSSSCG00000032460	-	7:54199931-54245349	978	0	0.0615539	0	0	0	0
ENSSSCT00000002052	ENSSSCG00000001832	ACAN	7:54479353-54519194	7081	0.00356101	0.00362422	0.00663165	0.0536237	0.00380865	0.0266725
ENSSSCT00000002056	ENSSSCG00000001834	MFGE8	7:54539706-54555040	2190	1.87511	0.932073	0.814756	0.651356	0.933867	0.918935
ENSSSCT00000002057	ENSSSCG00000001835	ABHD2	7:54655618-54769962	1488	2.62946	5.8638	3.06404	7.24771	5.5015	6.57929
ENSSSCT00000002058	ENSSSCG00000001836	RLBP1	7:54783968-54799822	2083	0	3.10202e-147	0	0.0113623	0	0
ENSSSCT00000002059	ENSSSCG00000001837	FANCI	7:54811089-54889950	4554	0.34724	0.176012	0.560883	0.0654456	0.0863963	0.00779521
ENSSSCT00000002060	ENSSSCG00000001838	POLG	7:54889156-54906876	4455	2.81325	3.18804	2.97922	4.55339	4.09508	4.51944
ENSSSCT00000002062	ENSSSCG00000001840	KIF7	7:55197151-55220264	8157	0.952796	1.37757	0.827412	1.64884	1.19048	1.4745
ENSSSCT00000002063	ENSSSCG00000001841	RHCG	7:55046244-55072218	3406	0	0	0.0283121	0	0	0
ENSSSCT00000002064	ENSSSCG00000040355	TICRR	7:55143239-55200640	6817	2.70555e-18	3.36936e-60	0.0136881	9.82001e-05	3.42753e-26	1.91686e-07
ENSSSCT00000002065	ENSSSCG00000001840	KIF7	7:55197151-55220264	7956	7.13405e-06	4.46129e-06	0.0197665	1.43072e-07	2.8205e-06	3.74737e-06
ENSSSCT00000002066	ENSSSCG00000001844	PLIN1	7:55237514-55250797	1579	5.32181e-06	0.0177104	0.0811289	4.18797e-06	0.111656	0.0148189
ENSSSCT00000002067	ENSSSCG00000001844	PLIN1	7:55237348-55251510	1884	0.185839	3.63044e-06	2.92267e-06	0.240832	3.9333e-06	0.148582
ENSSSCT00000002069	ENSSSCG00000001846	WDR93	7:55263841-55316448	2867	1.58456	0.630828	1.07401	0.524479	0.828557	0.648195
ENSSSCT00000002070	ENSSSCG00000001847	MESP1	7:55320477-55323340	2580	0.590796	0.332109	0.78845	0.252748	0.316241	0.333944
ENSSSCT00000002071	ENSSSCG00000001848	MESP2	7:55343133-55345868	1766	0.613808	0.172131	0.45858	0.244947	0.27948	0.330826
ENSSSCT00000002072	ENSSSCG00000001849	ANPEP	7:55351345-55366178	3104	9.46998e-06	4.07791e-06	0.258336	3.90049e-06	0.164181	0.0648649
ENSSSCT00000002073	ENSSSCG00000001850	-	7:55471098-55483436	791	3.08306	2.79777	2.76266	2.18147	1.71912	2.00205
ENSSSCT00000002075	ENSSSCG00000001852	IDH2	7:55654296-55675571	1817	16.7875	11.0091	17.081	11.0333	11.2224	10.9289
ENSSSCT00000002083	ENSSSCG00000001858	CIB1	7:55795067-55798621	815	23.0022	35.2773	29.9806	23.4362	22.7825	23.216
ENSSSCT00000002084	ENSSSCG00000001859	-	7:55806635-55807790	1155	0.618929	1.13786	1.13579	1.49485	1.08892	1.4406
ENSSSCT00000002085	ENSSSCG00000001860	NRG4	7:56199282-56261173	342	0.134602	0.420146	0	0	0.29332	0.256439
ENSSSCT00000002087	ENSSSCG00000001862	ETFA	7:56450524-56540253	1293	6.56915	9.34283	5.24058	11.0776	8.78893	10.6701
ENSSSCT00000002088	ENSSSCG00000001863	TMEM266	7:56311521-56439327	1801	0.0300363	2.75126e-11	0.0841433	8.65469e-05	0.0239751	0.0684202
ENSSSCT00000002089	ENSSSCG00000001863	TMEM266	7:56311521-56439327	1738	0	6.72006e-11	4.4467e-07	0.0698454	2.95456e-12	3.36866e-06
ENSSSCT00000002090	ENSSSCG00000001865	SCAPER	7:56634825-57012369	4101	1.65689	1.98612	1.40739	2.2501	1.65275	2.01579
ENSSSCT00000002091	ENSSSCG00000001866	RCN2	7:57041032-57058747	2134	5.11934	7.6297	4.20624	6.24261	5.04109	5.87307
ENSSSCT00000002092	ENSSSCG00000001867	PSTPIP1	7:57102756-57146751	3354	0.333967	0.34085	0.28375	0.719726	0.647375	0.569458
ENSSSCT00000002093	ENSSSCG00000001868	TSPAN3	7:57162083-57187409	1602	31.6873	38.386	24.8161	34.9807	33.4491	33.8271
ENSSSCT00000002094	ENSSSCG00000001869	PEAK1	7:57223850-57503648	6997	1.72497	2.73788	1.32412	2.75468	3.26236	2.88756
ENSSSCT00000002096	ENSSSCG00000001871	HMG20A	7:57504258-57570031	3796	2.24535	2.83733	1.07859	4.39121	2.43875	3.2109
ENSSSCT00000002097	ENSSSCG00000001872	LINGO1	7:57685214-57702549	2647	0.34009	0.403449	0.740494	0.27029	0.506313	0.501858
ENSSSCT00000002098	ENSSSCG00000001873	CSPG4	7:57949454-57988335	7957	0.173942	0.292885	0.235502	0.632782	0.294266	0.464651
ENSSSCT00000002100	ENSSSCG00000001875	SNX33	7:58003018-58014441	3782	3.02626	4.16751	3.15921	4.62439	4.18976	4.46276
ENSSSCT00000002101	ENSSSCG00000001877	SNUPN	7:58023417-58066394	2489	2.96845	3.67437	2.76134	3.1159	3.03123	2.95988
ENSSSCT00000002102	ENSSSCG00000001877	SNUPN	7:58039011-58065964	1317	0.117806	0.158443	0.0252763	0.374296	0.125415	0.308758
ENSSSCT00000002103	ENSSSCG00000001878	PTPN9	7:58078388-58164405	4763	2.12654	2.90113	1.88081	2.92686	2.93405	2.94331
ENSSSCT00000002105	ENSSSCG00000001880	SIN3A	7:58172076-58245860	4818	1.78865	1.44067	3.4937	1.81836	1.54021	1.49994
ENSSSCT00000002106	ENSSSCG00000001881	MAN2C1	7:58248705-58261202	3131	1.7767	2.88735	1.89345	3.41449	3.08416	3.35428
ENSSSCT00000002107	ENSSSCG00000001882	NEIL1	7:58261764-58268364	1511	1.67534	1.03194	1.59129	0.972697	1.29497	1.26369
ENSSSCT00000002109	ENSSSCG00000001884	COMMD4	7:58276958-58283063	1068	2.42836	3.89007	3.61336	3.9422	2.90338	3.77691
ENSSSCT00000002110	ENSSSCG00000001885	C15orf39	7:58379691-58390100	5383	0.439037	0.576667	0.83525	1.01583	1.111	1.05607
ENSSSCT00000002113	ENSSSCG00000001887	SCAMP5	7:58550192-58608056	3592	0.905128	1.6533	0.843421	1.75627	1.45287	1.64116
ENSSSCT00000002114	ENSSSCG00000001888	RPP25	7:58608542-58610078	1536	0.107448	0.127887	0.184091	0.190637	0.230312	0.251876
ENSSSCT00000002118	ENSSSCG00000001892	SCAMP2	7:58672666-58699139	2364	3.4946	3.94728	2.82521	2.69858	1.39317	2.2248
ENSSSCT00000002123	ENSSSCG00000001895	CPLX3	7:58712623-58717030	1603	0.0341544	0.0348391	0.0319112	0.0908861	0	0.0640438
ENSSSCT00000002126	ENSSSCG00000001898	ULK3	7:58699983-58707185	2537	2.0341	3.60203	2.61063	3.61041	3.60251	3.74708
ENSSSCT00000002127	ENSSSCG00000001899	LMAN1L	7:58717820-58730172	1693	0.0321508	0	0	0.0142571	0	0
ENSSSCT00000002128	ENSSSCG00000001900	CSK	7:58736472-58755327	3174	0.0990927	0.582146	0.750328	0.711805	0.471695	0.544243
ENSSSCT00000002129	ENSSSCG00000001901	CYP1A2	7:58779474-58786117	2078	0	0.0130989	0	0	0	0
ENSSSCT00000002132	ENSSSCG00000001903	EDC3	7:58828692-58897581	6520	0.515035	0.564572	0.625334	0.684208	0.637125	0.727659
ENSSSCT00000002133	ENSSSCG00000001904	CLK3	7:58895335-58906393	1786	6.60022	6.00112	6.40342	4.87008	5.98455	5.75261
ENSSSCT00000002134	ENSSSCG00000001905	ARID3B	7:58934779-58995973	1710	0.906254	0.843167	0.920714	0.930634	0.69843	0.894248
ENSSSCT00000002135	ENSSSCG00000001906	CYP1A1	7:58802879-58809775	3500	0.0369068	0.00751694	0	0.00653845	0	0.0069112
ENSSSCT00000002136	ENSSSCG00000001907	UBL7	7:59070712-59084120	1378	8.31404	10.8387	11.3876	9.92688	10.0411	9.33514
ENSSSCT00000002137	ENSSSCG00000001908	CCDC33	7:59190437-59287891	2268	0	0	0.010909	0	0.0125207	0.0109549
ENSSSCT00000002138	ENSSSCG00000001909	STRA6	7:59317962-59347264	2917	0.0447079	0.0455423	0.0333437	0.134682	0.0191416	0.0586186
ENSSSCT00000002139	ENSSSCG00000001910	ISLR	7:59349679-59352843	2336	3.05848	5.89885	2.95884	5.85328	5.22759	5.80488
ENSSSCT00000002141	ENSSSCG00000001912	PML	7:59408592-59450046	2624	3.22825	2.44971	3.54677	4.20425	3.23549	3.60556
ENSSSCT00000002142	ENSSSCG00000001913	STOML1	7:59452116-59461206	2100	2.0836	2.34398	2.66769	1.75698	1.85045	1.86902
ENSSSCT00000002143	ENSSSCG00000001914	LOXL1	7:59481406-59505149	2442	1.23141	1.27679	0.795944	2.04865	1.88509	1.92257
ENSSSCT00000002145	ENSSSCG00000001916	C15orf59	7:59665363-59677079	1491	0.388771	0.207774	0.121126	0.14782	0.456381	0.329848
ENSSSCT00000002146	ENSSSCG00000001917	CD276	7:59629637-59717334	1659	2.56447e-96	9.78932e-17	1.15562e-33	0.143477	7.25312e-13	1.03213e-06
ENSSSCT00000002147	ENSSSCG00000001918	NPTN	7:59758205-59840591	4215	1.44187	2.32801	1.99925	1.30181	2.26954	2.0507
ENSSSCT00000002149	ENSSSCG00000001920	HCN4	7:60010481-60049688	3600	0.0143337	0	0	0	0	0
ENSSSCT00000002150	ENSSSCG00000001921	NEO1	7:60064990-60299788	6976	2.36761	2.69418	2.55562	2.63645	3.17525	2.7243
ENSSSCT00000002153	ENSSSCG00000001924	BBS4	7:60631913-60693326	2527	5.0785	5.91973	4.78972	4.2183	4.26004	4.22546
ENSSSCT00000002154	ENSSSCG00000001925	ADPGK	7:60584034-60623899	2550	3.22826	4.85509	4.00147	5.73086	5.00198	5.26532
ENSSSCT00000002155	ENSSSCG00000001926	-	7:60853870-60884441	826	0.0369656	0.0378321	0.0347248	0.0328785	0	0
ENSSSCT00000002156	ENSSSCG00000001927	-	7:60877888-60913339	4106	0.034627	0.0537865	0.0316552	0.121339	0.0765737	0.114083
ENSSSCT00000002157	ENSSSCG00000001928	-	7:60931180-60958893	1380	0.0403914	0	0.0188852	0	0.0216515	0
ENSSSCT00000002158	ENSSSCG00000001929	PARP6	7:60972821-60999863	2670	2.85688	3.03043	3.42287	4.08232	3.89128	4.12641
ENSSSCT00000002159	ENSSSCG00000001930	PKM	7:61007088-61032773	2600	8.75207	17.1038	9.98139	23.068	17.9173	20.5902
ENSSSCT00000002162	ENSSSCG00000001931	-	7:61033830-61078507	2916	0.74242	1.549	0.466982	1.10162	0.957427	0.96337
ENSSSCT00000002164	ENSSSCG00000001932	-	7:61098945-61108699	744	0.0421456	0	0.0792933	0	0	0
ENSSSCT00000002166	ENSSSCG00000001934	-	7:61113783-61193266	4613	1.44325	1.94486	1.06508	1.65314	1.57239	1.6205
ENSSSCT00000002170	ENSSSCG00000001938	SSTR1	7:61892955-61894128	1173	0	0	0	0	0.0782579	0.0456435
ENSSSCT00000002174	ENSSSCG00000001942	PAX9	7:63324707-63346326	4647	0.0219799	0.156641	0.0358261	0.145992	0.188121	0.164603
ENSSSCT00000002178	ENSSSCG00000001946	MBIP	7:63659279-63684529	1635	0.83441	1.53845	1.36111	1.83714	1.4662	1.73818
ENSSSCT00000002179	ENSSSCG00000001947	BRMS1L	7:64083288-64123857	2689	0.636171	0.70729	0.72596	0.924193	0.725502	0.889701
ENSSSCT00000002181	ENSSSCG00000001949	INSM2	7:64374822-64376495	1167	0	0	0	0	4.24815e-21	9.37885e-19
ENSSSCT00000002182	ENSSSCG00000001950	-	7:64620532-64763281	2803	0.750384	1.10022	0.817616	1.56295	1.49306	1.31862
ENSSSCT00000002183	ENSSSCG00000001951	PSMA6	7:64575558-64603258	3590	7.26681	9.75725	6.4767	7.15014	7.13015	7.26837
ENSSSCT00000002184	ENSSSCG00000001952	NFKBIA	7:64507742-64511304	1871	13.7128	22.7786	13.3408	27.9451	19.1638	23.6519
ENSSSCT00000002187	ENSSSCG00000001955	SRP54	7:64829227-64877574	2968	6.4264	7.73557	7.02208	6.96172	6.73752	7.11192
ENSSSCT00000002190	ENSSSCG00000001958	BAZ1A	7:64970387-65069102	4674	2.74954	4.29729	2.60243	4.42752	3.72759	4.04552
ENSSSCT00000002192	ENSSSCG00000001959	CFL2	7:65090622-65094515	3577	0.96884	1.27307	0.471746	0.52728	0.888882	0.780112
ENSSSCT00000002193	ENSSSCG00000001960	EAPP	7:65240203-65263272	1331	5.89118	7.34476	6.59252	6.08733	6.02332	6.07894
ENSSSCT00000002196	ENSSSCG00000001963	EGLN3	7:65805486-65833573	3283	0.355233	0.603	0.360507	0.67136	0.658968	0.665281
ENSSSCT00000002197	ENSSSCG00000001964	NPAS3	7:65928448-66204892	2001	0.00136598	0.13419	0.162384	0.439096	0.210624	0.401436
ENSSSCT00000002198	ENSSSCG00000024517	AKAP6	7:66922452-67375269	6804	0.0534655	0.138852	7.92952e-06	0.353366	0.000765128	0.2243
ENSSSCT00000002199	ENSSSCG00000001966	ARHGAP5	7:67494938-67631427	7345	9.09873	9.19983	7.71868	8.44297	8.92332	9.03307
ENSSSCT00000002201	ENSSSCG00000001968	NUBPL	7:67788987-68035258	1046	0.480483	0.421484	1.03358	0.251159	0.000120783	0.0522499
ENSSSCT00000002203	ENSSSCG00000001970	HEATR5A	7:68161059-68257904	6102	6.42374	7.2818	5.5134	6.149	5.83689	6.0044
ENSSSCT00000002204	ENSSSCG00000001971	HECTD1	7:68318416-68422394	9199	9.27277	12.4972	8.89427	12.5887	10.9625	11.8501
ENSSSCT00000002205	ENSSSCG00000001972	AP4S1	7:68426258-68447491	435	0.625065	1.56737	1.10625	1.1199	1.25683	1.09905
ENSSSCT00000002206	ENSSSCG00000001973	SCFD1	7:68742147-68850980	2010	3.8483	4.55778	3.98059	4.42298	4.85158	4.68316
ENSSSCT00000002207	ENSSSCG00000001974	G2E3	7:68852782-68917062	6176	0.800685	0.848417	0.6463	0.76539	0.768419	0.828111
ENSSSCT00000002209	ENSSSCG00000001975	PRKD1	7:69528171-69872090	2601	0.132618	0.331001	0.256155	0.245288	0.378388	0.489255
ENSSSCT00000002211	ENSSSCG00000001977	STXBP6	7:74313066-74548378	699	4.06113e-07	1.04814	2.53781e-07	1.2491	0.255179	0.677358
ENSSSCT00000002212	ENSSSCG00000001978	GZMB	7:74705060-74709061	1604	2.99497	2.01581	4.0288	0.272469	1.38424	0.825416
ENSSSCT00000002218	ENSSSCG00000001982	-	7:74826913-74830017	714	0	0.00199085	0.00175391	0.00162481	0	0.00171732
ENSSSCT00000002219	ENSSSCG00000001983	SDR39U1	7:74851291-74854203	1228	0.299864	0.161554	0.145249	0.170241	0.255434	0.260375
ENSSSCT00000002220	ENSSSCG00000001984	KHNYN	7:74852648-74865122	6488	1.80466	1.91489	1.42479	1.5351	1.21928	1.44336
ENSSSCT00000002221	ENSSSCG00000001985	CBLN3	7:74865290-74868460	2520	0.0940048	0.106426	0.0389659	0.240667	0.123006	0.166329
ENSSSCT00000002222	ENSSSCG00000001986	NFATC4	7:74918983-74929600	3254	0.378156	0.278473	0.352601	0.816525	0.637574	0.609407
ENSSSCT00000002223	ENSSSCG00000001987	RIPK3	7:74951104-74956829	3489	2.20685	3.5539	2.33242	3.007	3.22541	3.14571
ENSSSCT00000002224	ENSSSCG00000001988	ADCY4	7:74956245-74972200	3265	0.426298	0.451877	0.461651	0.478613	0.654426	0.564926
ENSSSCT00000002226	ENSSSCG00000001989	CIDEB	7:74982854-74985775	1186	2.401	1.05435	2.33743	0.57557	0.746887	0.833684
ENSSSCT00000002227	ENSSSCG00000001989	CIDEB	7:74982942-74985519	651	9.37309e-34	3.07046e-27	1.5538e-23	2.38215e-33	1.17956e-29	8.80761e-25
ENSSSCT00000002228	ENSSSCG00000001990	NOP9	7:74985752-74992951	2892	0.924422	0.670299	0.535956	0.803161	0.793805	0.84989
ENSSSCT00000002229	ENSSSCG00000001991	DHRS1	7:74992114-75002151	1482	6.98153	8.444	9.52776	6.04076	7.38638	6.16765
ENSSSCT00000002230	ENSSSCG00000001992	RABGGTA	7:75022121-75030070	3978	0.292901	0.665452	0.462706	0.578959	0.474608	0.466291
ENSSSCT00000002232	ENSSSCG00000001994	TINF2	7:75056808-75060489	2565	1.14986	1.08215	1.25136	1.12214	1.48922	1.40739
ENSSSCT00000002237	ENSSSCG00000001999	-	7:75089440-75118735	6840	2.26014	1.61039	2.81785	2.49102	2.96768	3.04919
ENSSSCT00000002238	ENSSSCG00000002000	IPO4	7:75104514-75118735	5999	4.98126	7.15496	5.273	4.12211	4.2816	3.35266
ENSSSCT00000002239	ENSSSCG00000002001	REC8	7:75118743-75139630	5088	0.664542	0.595743	0.502318	0.369286	0.560676	0.456597
ENSSSCT00000002240	ENSSSCG00000002002	IRF9	7:75133695-75139230	1700	11.4446	9.27049	8.35829	8.04206	8.57709	7.87564
ENSSSCT00000002241	ENSSSCG00000002003	-	7:75140208-75157549	3420	2.05142	2.65813	1.75325	3.49796	3.15135	3.3994
ENSSSCT00000002242	ENSSSCG00000002004	-	7:75153773-75159030	2801	5.26445	6.00967	4.40363	4.48273	4.27638	4.26619
ENSSSCT00000002243	ENSSSCG00000002005	EMC9	7:75159235-75161829	866	3.24335	3.74637	3.99452	2.75988	2.73508	2.94984
ENSSSCT00000002244	ENSSSCG00000002006	PSME1	7:75160764-75164810	2076	6.36915	9.16061	5.80793	7.88362	6.74465	7.22477
ENSSSCT00000002246	ENSSSCG00000002007	FITM1	7:75161830-75168634	2313	0.159583	0.27713	0.45587	0.232923	0.4634	0.331834
ENSSSCT00000002247	ENSSSCG00000002008	DCAF11	7:75168838-75181142	5553	6.23262	7.12844	6.55484	6.66456	6.79439	6.97093
ENSSSCT00000002248	ENSSSCG00000002009	PCK2	7:75187198-75197638	2336	5.55119	7.60341	10.3056	2.89062	6.74707	6.01334
ENSSSCT00000002249	ENSSSCG00000002010	NRL	7:75199195-75210605	897	0.13364	0.034173	0.0627089	0.0594032	0	0.0313933
ENSSSCT00000002251	ENSSSCG00000002012	CARMIL3	7:75225429-75241264	3848	0.0401104	0.0544523	4.89129e-06	0.0651254	2.45582e-06	0.000285047
ENSSSCT00000002252	ENSSSCG00000002013	DHRS4	7:75241350-75255701	2020	1.27325	1.30238	1.47199	0.75479	1.01108	0.913715
ENSSSCT00000002253	ENSSSCG00000002014	JPH4	7:75522792-75532962	4090	0.00627355	0.0570663	0.00686318	0.0327741	0.0294149	0.0232438
ENSSSCT00000002254	ENSSSCG00000002015	AP1G2	7:75533201-75549488	2632	1.97106	4.04094	2.10897	3.63535	2.72323	2.41732
ENSSSCT00000002255	ENSSSCG00000002016	THTPA	7:75545972-75552904	5276	1.33019	2.36475	2.17673	2.97041	2.78922	2.90518
ENSSSCT00000002259	ENSSSCG00000002020	-	7:75621341-75629447	1124	2.14815	2.91932	0.833968	2.23728	1.53796	1.86117
ENSSSCT00000002260	ENSSSCG00000032977	PPP1R3E	7:75776922-75780642	1380	0.270417	0.72161	0.324248	0.069617	0.35913	0.281666
ENSSSCT00000002263	ENSSSCG00000002023	PABPN1	7:75752064-75756514	915	5.72961	7.36686	5.30682	5.0308	6.79428	5.77051
ENSSSCT00000002265	ENSSSCG00000002025	SLC22A17	7:75734874-75741112	2429	0.617788	1.08927	0.345493	0.485028	0.629266	0.802066
ENSSSCT00000002266	ENSSSCG00000002026	EFS	7:75722182-75731592	2729	7.24469	4.20359	7.33675	3.85173	5.60842	4.62852
ENSSSCT00000002268	ENSSSCG00000002028	CMTM5	7:75707132-75710017	1178	0.0725954	0.0741388	0.0226528	0.0644559	0.0519151	0.0681283
ENSSSCT00000002271	ENSSSCG00000002029	MYH7	7:75650846-75672910	6158	5.25651e-07	1.04839e-06	0.240943	1.8551e-07	3.66734e-07	2.25469e-07
ENSSSCT00000002275	ENSSSCG00000002033	CEBPE	7:75927661-75929769	1526	0	0.0368071	0	0.0160029	0.0193334	0.0169149
ENSSSCT00000002276	ENSSSCG00000002034	ACIN1	7:75951352-75989230	4256	6.24502	9.00715	8.57909	11.1856	11.6731	11.8383
ENSSSCT00000002277	ENSSSCG00000002035	C14orf119	7:75947770-75951806	2214	5.96408	8.68356	5.72147	4.49941	6.78491	5.71155
ENSSSCT00000002278	ENSSSCG00000002036	-	7:76014901-76021920	720	10.5227	9.8331	10.1949	6.93908	8.36406	8.02046
ENSSSCT00000002279	ENSSSCG00000002037	CDH24	7:75990219-76001130	3390	0.137331	0.342474	0.270297	0.601771	0.658117	0.601466
ENSSSCT00000002281	ENSSSCG00000002039	MMP14	7:76174679-76185920	3531	9.42608	29.3862	10.972	40.619	26.8509	33.8725
ENSSSCT00000002282	ENSSSCG00000002040	MRPL52	7:76187453-76191616	813	4.71252	6.98455	6.44679	5.60039	6.76661	6.02566
ENSSSCT00000002284	ENSSSCG00000002041	SLC7A7	7:76201211-76235404	2301	0.836869	1.19923	1.05932	3.82879	2.05256	3.05959
ENSSSCT00000002285	ENSSSCG00000002042	OXA1L	7:76230905-76266427	6562	6.01233	7.02492	6.40958	6.85798	6.62028	6.61457
ENSSSCT00000002288	ENSSSCG00000002045	-	7:76362991-76363747	756	0.0412987	0	0.0194205	0.0551315	0.0888178	0.0776944
ENSSSCT00000002293	ENSSSCG00000002050	DAD1	7:76431963-76457890	1243	11.6468	11.8683	11.1327	14.9833	11.5394	13.7454
ENSSSCT00000002294	ENSSSCG00000002051	ABHD4	7:76404505-76419641	2301	1.36769	6.87557	2.70937	7.21839	6.61667	6.82852
ENSSSCT00000002295	ENSSSCG00000002052	OR6J1	7:76392242-76393256	1014	0.0288391	0.1179	0.0270311	0	0.061912	0
ENSSSCT00000002296	ENSSSCG00000002053	-	7:76649948-76650227	279	0.20482	0	0.201208	0	0	0
ENSSSCT00000002298	ENSSSCG00000002055	-	7:76720811-76721102	291	0	0	0.182269	0	0	0
ENSSSCT00000002299	ENSSSCG00000002056	TRAV41	7:76759753-76760023	270	0.221204	0	0	0	0	0
ENSSSCT00000002316	ENSSSCG00000040308	-	7:76901681-76901957	276	0	0	0.206552	0	0	0
ENSSSCT00000002321	ENSSSCG00000040548	-	7:77313682-77321022	885	0	1.00625e-30	0.0276076	1.09011e-07	0	0
ENSSSCT00000002323	ENSSSCG00000036061	-	7:76995619-76995889	270	0	0	0.218106	0	0	0
ENSSSCT00000002326	ENSSSCG00000002081	-	7:76978174-76979901	1256	0.0337172	0.0803231	0.126195	0.0133021	0	0.01406
ENSSSCT00000002329	ENSSSCG00000036292	-	7:77290752-77291031	279	0	0	0	0	0.112589	0.0984067
ENSSSCT00000002336	ENSSSCG00000036513	-	7:77283911-77284631	540	0	0	0	0	0.0698062	0.0610536
ENSSSCT00000002339	ENSSSCG00000035087	-	AEMK02000555.1:34877-35156	279	0	0	0	0	0.112589	0.0984067
ENSSSCT00000002346	ENSSSCG00000002097	-	7:77406839-77407127	288	0.190661	0	0	0	0	0
ENSSSCT00000002348	ENSSSCG00000002099	-	7:77419632-77420201	459	0	0.0847254	0.234418	0.0735269	0	0.0777091
ENSSSCT00000002379	ENSSSCG00000002127	CHD8	7:77719516-77780205	8554	0.661758	1.83996	0.598415	3.07506	2.17679	2.44832
ENSSSCT00000002382	ENSSSCG00000002129	RPGRIP1	7:77814775-77887875	3543	0.174902	0.111323	0.095073	0.109744	0.0623886	0.109177
ENSSSCT00000002387	ENSSSCG00000002134	RNASE10	7:78391474-78394035	785	0	0.0403256	0.148091	0	0.0846813	0.0740769
ENSSSCT00000002388	ENSSSCG00000002135	PNP	7:78427280-78447146	1239	0.122117	0.0536267	0.0843148	0.0845773	6.67738e-21	1.92358e-209
ENSSSCT00000002392	ENSSSCG00000002138	OSGEP	7:78454665-78462259	1351	4.61308	4.20166	4.20174	2.20782	2.93468	3.74384
ENSSSCT00000002394	ENSSSCG00000002140	-	7:78470420-78479959	4796	0.127642	0.0901287	0.064393	0.0745783	0.0796548	0.0447864
ENSSSCT00000002396	ENSSSCG00000002142	TEP1	7:78491052-78530146	7946	2.20427	4.20771	2.49101	6.57088	4.93507	5.73633
ENSSSCT00000002397	ENSSSCG00000002143	PARP2	7:78531708-78551424	5306	1.99324	1.51127	2.01313	1.10806	1.21989	1.18869
ENSSSCT00000002398	ENSSSCG00000002144	CCNB1IP1	7:78553782-78575344	2520	0.449134	0.766267	0.711127	0.583155	0.816314	0.606612
ENSSSCT00000002399	ENSSSCG00000002145	TTC5	7:78578231-78599162	2740	1.09879	1.64506	1.13145	1.43083	1.4626	1.43185
ENSSSCT00000002423	ENSSSCG00000039081	-	AEMK02000410.1:260313-261387	864	0.0113955	0.0116563	0.0325953	0.0153646	0	0
ENSSSCT00000002424	ENSSSCG00000002170	-	AEMK02000410.1:285351-286281	930	0	0.0327028	0	0.0284251	0.0686865	0
ENSSSCT00000002426	ENSSSCG00000031517	-	AEMK02000182.1:45868-46807	939	0	0	0	0.0140479	0	0.014848
ENSSSCT00000002428	ENSSSCG00000039742	-	AEMK02000364.1:97188-98117	906	0.0660153	0	0	0	0	0
ENSSSCT00000002430	ENSSSCG00000002175	-	7:79524950-79525886	936	0	0	0	0.0282046	0	0
ENSSSCT00000002437	ENSSSCG00000021523	-	7:79531067-79531982	915	0.0163074	0.0333551	0	0.0144957	0	0.0153214
ENSSSCT00000002442	ENSSSCG00000002187	-	7:79341337-79342275	873	0.0345329	0.035328	0	0	0	0
ENSSSCT00000002443	ENSSSCG00000002188	-	7:79302532-79306110	948	0.0102364	0	0	0.0831823	0.0334127	0.0292302
ENSSSCT00000002444	ENSSSCG00000034430	-	7:79322715-79323651	936	0.063467	0	0	0.0564093	0	0
ENSSSCT00000002445	ENSSSCG00000002190	-	7:79358829-79367848	927	0.048158	0.0328312	0	0.0285366	0	0.015081
ENSSSCT00000002451	ENSSSCG00000039530	-	AEMK02000253.1:10652-11576	924	0	0	0	0.0429734	0	0.0151404
ENSSSCT00000002454	ENSSSCG00000034646	-	7:78734506-78735433	927	0	0.0328312	0	0.0285366	0	0.0335133
ENSSSCT00000002456	ENSSSCG00000034109	-	AEMK02000661.1:487052-487967	915	0.0326148	0	0	0	0.0175138	0
ENSSSCT00000002457	ENSSSCG00000002202	-	AEMK02000410.1:221344-222292	948	0	0	0	0.0277739	0	0
ENSSSCT00000002470	ENSSSCG00000038583	-	7:78745729-78746671	942	0	0	0	0.00466461	0.025361	0.032047
ENSSSCT00000002490	ENSSSCG00000002235	LPCAT4	7:80140652-80152314	2311	5.76436e-07	0.10934	0.118708	0.302557	0.273049	0.313583
ENSSSCT00000002496	ENSSSCG00000002241	NUTM1	7:80149850-80159334	3360	0.0154084	0.0235391	0	0.0477746	0.00824488	0.0288561
ENSSSCT00000002498	ENSSSCG00000002243	SLC12A6	7:80191833-80263345	3445	0.808405	1.04738	1.49226	1.93622	1.4346	1.66968
ENSSSCT00000002500	ENSSSCG00000002245	KATNBL1	7:80287645-80350165	4271	1.63729	1.73421	1.55312	1.3598	1.48227	1.4261
ENSSSCT00000002508	ENSSSCG00000002252	ARRDC4	7:81656765-81669590	4201	1.79377	7.72178	2.21094	8.22996	7.06982	7.64818
ENSSSCT00000002510	ENSSSCG00000002254	NR2F2	7:83076121-83083082	3984	0.256577	0.424843	0.277523	0.442949	0.542944	0.46762
ENSSSCT00000002511	ENSSSCG00000002254	NR2F2	7:83077506-83084256	2446	0.161868	0.505571	0.442988	1.24663	0.617743	0.837136
ENSSSCT00000002514	ENSSSCG00000002257	MCTP2	7:84727103-84962894	3062	0.0946609	0.768664	0.448434	0.988489	0.129624	0.510553
ENSSSCT00000002515	ENSSSCG00000002258	KLHL25	7:88262923-88264691	1707	0.36639	0.682342	0.401736	1.08785	0.477903	0.910918
ENSSSCT00000002516	ENSSSCG00000002259	-	7:88105683-88219075	5736	8.19401	12.1892	9.97254	13.0546	12.095	12.5035
ENSSSCT00000002517	ENSSSCG00000002260	-	7:88018249-88046066	699	3.83511	5.42181	3.50835	6.54579	4.67534	6.23091
ENSSSCT00000002519	ENSSSCG00000002262	SV2B	7:87569080-87766206	6203	0	0	0	0.00361161	0	0.00381752
ENSSSCT00000002520	ENSSSCG00000002263	SLCO3A1	7:86788189-87103823	2847	2.38233e-06	0.173445	0.239209	0.56285	0.140061	0.256723
ENSSSCT00000002523	ENSSSCG00000002265	FAM174B	7:86269051-86289228	540	7.24649	3.39286	7.90015	3.92813	7.53907	4.94534
ENSSSCT00000002524	ENSSSCG00000002266	-	7:85983892-86106935	5336	0.152861	0.515264	0.843808	0.461865	0.850462	0.15305
ENSSSCT00000002525	ENSSSCG00000002267	RGMA	7:85921587-85968882	3357	0.979675	1.299	1.45379	2.22354	2.48147	2.26467
ENSSSCT00000002526	ENSSSCG00000002268	AKAP5	7:88538983-88547392	4390	0.559559	0.623117	0.635237	0.459437	0.629852	0.545652
ENSSSCT00000002527	ENSSSCG00000002269	MTHFD1	7:88471373-88537389	7045	3.31283	2.10318	2.38716	2.68577	2.49752	2.48362
ENSSSCT00000002532	ENSSSCG00000002274	HSPA2	7:88607554-88609464	1890	0.584089	0.479318	0.585209	0.745261	0.732483	0.774386
ENSSSCT00000002533	ENSSSCG00000002275	PPP1R36	7:88614872-88652441	1886	0.128512	0.145585	0.133311	0.215235	0.397683	0.267649
ENSSSCT00000002534	ENSSSCG00000002276	PLEKHG3	7:88764489-88810993	4644	3.41734	5.17689	2.86183	4.54194	4.87134	4.8282
ENSSSCT00000002535	ENSSSCG00000002277	SPTB	7:88812717-88868442	9125	0.0500582	0.0391868	0.0419456	0.0862659	0.0576495	0.0650703
ENSSSCT00000002537	ENSSSCG00000002279	GPX2	7:89007369-89011620	1065	0.108864	0.41713	0.127493	0.26592	0.175242	0.229966
ENSSSCT00000002538	ENSSSCG00000002280	RAB15	7:89017538-89039980	1037	3.38083e-06	7.30414e-06	4.31203e-06	2.24594e-06	5.9804e-06	3.49157e-06
ENSSSCT00000002539	ENSSSCG00000002281	FNTB	7:89052506-89131074	2841	1.48038	1.92959	1.45736	2.04495	1.74209	1.88595
ENSSSCT00000002542	ENSSSCG00000002283	FUT8	7:89395633-89680568	2954	1.52701	1.8132	1.09314	1.78686	1.69266	2.09343
ENSSSCT00000002545	ENSSSCG00000002285	GPHN	7:90346736-90913620	3458	0.509576	0.190023	0.253248	0.0874091	0.193268	0.084547
ENSSSCT00000002546	ENSSSCG00000002286	FAM71D	7:90933999-90944193	1191	0.119468	0.146403	0.0223657	0.127283	0.179407	0.201802
ENSSSCT00000002548	ENSSSCG00000002287	MPP5	7:90955679-91055598	4760	0.383224	3.1777	2.13269	1.54375	1.65876	1.66742
ENSSSCT00000002551	ENSSSCG00000002290	PLEK2	7:91109454-91133202	2776	0.113079	0.201598	0.193296	0.422185	0.38331	0.370806
ENSSSCT00000002553	ENSSSCG00000002292	PLEKHH1	7:91257324-91304996	4050	0.0823945	0.425933	0.106283	0.712935	0.427237	0.670508
ENSSSCT00000002555	ENSSSCG00000002294	ARG2	7:91343987-91385910	1447	0.470219	0.429537	0.537687	1.0689	1.11859	1.26474
ENSSSCT00000002556	ENSSSCG00000002295	VTI1B	7:91381643-91413884	5571	2.81157	3.69225	3.18237	3.51857	3.29027	3.41635
ENSSSCT00000002557	ENSSSCG00000002296	RDH11	7:91414947-91452535	2946	6.46828	7.58941	6.13725	8.30249	8.30615	8.1957
ENSSSCT00000002558	ENSSSCG00000002297	RDH12	7:91481216-91493306	1524	0.162589	0.516057	0.388319	0.62503	0.445321	0.575951
ENSSSCT00000002559	ENSSSCG00000002298	ZFYVE26	7:91520571-91590449	7625	1.3378	2.22545	1.68191	3.81352	2.76621	3.11595
ENSSSCT00000002567	ENSSSCG00000002305	EXD2	7:92848095-92909058	4982	1.29286	1.39893	1.55303	1.63544	1.74759	1.79453
ENSSSCT00000002568	ENSSSCG00000002306	GALNT16	7:92929068-93041441	4095	0.739338	1.38439	0.566186	1.36516	0.958664	1.18489
ENSSSCT00000002569	ENSSSCG00000002307	ERH	7:93068183-93083937	842	12.0212	19.8372	14.7819	18.2033	16.3305	16.5933
ENSSSCT00000002571	ENSSSCG00000002309	PLEKHD1	7:93152945-93187598	3323	10.8751	6.98999	6.3399	13.2182	10.1329	11.5166
ENSSSCT00000002572	ENSSSCG00000002310	CCDC177	7:93224129-93226226	2097	0.0127246	0.0259405	0.0356245	0.0451205	0.0272546	0.0238461
ENSSSCT00000002573	ENSSSCG00000002311	SUSD6	7:93253721-93344188	5110	1.83331	3.41963	3.5073	4.72465	4.98795	4.7367
ENSSSCT00000002574	ENSSSCG00000032583	SRSF5	7:93393445-93447648	1502	5.04746	8.76616	6.47196	7.20724	8.73121	7.86937
ENSSSCT00000002575	ENSSSCG00000002313	SLC10A1	7:93324365-93421776	3890	0.0396589	0.0269223	0.0369495	0.0351276	0.0282905	0.0309419
ENSSSCT00000002576	ENSSSCG00000002314	SMOC1	7:93475972-93626283	1381	0.161782	0.250649	0.072388	0.138554	0.275981	0.176816
ENSSSCT00000002577	ENSSSCG00000002315	SLC8A3	7:93643617-93795468	4578	0.513021	0.116698	0.940795	0.0631235	0.159074	0.128614
ENSSSCT00000002578	ENSSSCG00000002316	COX16	7:93861141-93882359	725	0.958318	2.18689	2.58256	1.93894	1.59309	1.59848
ENSSSCT00000002579	ENSSSCG00000002317	-	7:93896209-93898402	2193	0.204088	0.140577	0.120885	0.162995	0.120094	0.136314
ENSSSCT00000002583	ENSSSCG00000002321	-	7:94025654-94028015	2238	6.85043e-05	7.16321e-05	6.42765e-05	6.04439e-05	9.56039e-12	1.69337e-12
ENSSSCT00000002584	ENSSSCG00000002322	ADAM21	7:94084809-94086963	2154	0.0618052	0.0629946	0.126879	0.0767012	0.0132373	0.0347456
ENSSSCT00000002588	ENSSSCG00000002326	-	7:94014153-94016388	2235	0.0871111	0.144933	0.0925714	0.0784671	0.111179	0.094864
ENSSSCT00000002591	ENSSSCG00000002329	MAP3K9	7:94302821-94378003	4196	0.195005	0.159203	0.0354355	0.277577	0.298765	0.299461
ENSSSCT00000002592	ENSSSCG00000002329	MAP3K9	7:94302821-94380619	4757	0.231038	0.744757	0.398468	1.27627	0.931094	1.08762
ENSSSCT00000002593	ENSSSCG00000002330	PCNX1	7:94445383-94617925	11816	0.573205	0.476284	0.80499	1.11702	0.467168	0.806251
ENSSSCT00000002595	ENSSSCG00000002332	SIPA1L1	7:95021371-95168721	7773	2.54675e-07	0.0595826	0.100652	0.018677	0.0519857	0.0643894
ENSSSCT00000002596	ENSSSCG00000002333	DPF3	7:96039143-96254290	1074	0.296916	0.152359	0.274931	0.407366	0.382079	0.386865
ENSSSCT00000002600	ENSSSCG00000002337	ZFYVE1	7:96323260-96380291	4465	2.1268	3.09931	2.1245	5.51853	4.32577	4.75311
ENSSSCT00000002603	ENSSSCG00000002340	PSEN1	7:96478189-96568182	5352	7.50343	14.1499	8.69872	12.1912	11.5015	12.0373
ENSSSCT00000002605	ENSSSCG00000002341	PAPLN	7:96585206-96625053	6991	1.82154	6.93116	4.76244	5.90284	4.0714	4.95348
ENSSSCT00000002606	ENSSSCG00000022178	NUMB	7:96625638-96799975	2814	0.0168762	1.59662e-30	0.141623	0.0834749	0.0471396	0.0526678
ENSSSCT00000002608	ENSSSCG00000002344	RIOX1	7:96823091-96831576	3490	2.33211	2.39765	1.95247	2.73482	2.9552	2.9046
ENSSSCT00000002610	ENSSSCG00000002346	PNMA1	7:97049955-97051017	1062	0.873806	1.22766	1.66295	1.52807	1.87548	1.61513
ENSSSCT00000002612	ENSSSCG00000002348	-	7:96984541-96990397	1501	1.97225	2.69963	1.10201	2.7876	2.67844	2.89764
ENSSSCT00000002613	ENSSSCG00000002349	ACOT4	7:96941467-96948726	5128	0.317834	0.678615	0.0799055	1.36953	0.702094	1.18483
ENSSSCT00000002614	ENSSSCG00000002350	ELMSAN1	7:97055797-97077034	3308	3.52413	4.17947	3.99972	4.37772	4.81917	4.42929
ENSSSCT00000002615	ENSSSCG00000002351	-	7:97174175-97195590	1589	4.35014	4.76815	2.2419	5.39041	4.29916	5.13216
ENSSSCT00000002616	ENSSSCG00000002352	ZNF410	7:97198030-97243761	2570	2.00818	2.54284	2.32892	2.52983	2.10935	2.24011
ENSSSCT00000002617	ENSSSCG00000002353	FAM161B	7:97244922-97258459	2888	0.894622	1.13226	1.00254	0.952803	1.03497	1.03251
ENSSSCT00000002618	ENSSSCG00000002354	COQ6	7:97258673-97271302	2480	1.54525	1.6056	1.6983	2.25231	1.73186	2.11888
ENSSSCT00000002619	ENSSSCG00000002355	ENTPD5	7:97272452-97296959	3467	1.73305e-09	0.113004	3.42866e-05	7.03808e-17	0.0813764	0.0382034
ENSSSCT00000002620	ENSSSCG00000002356	BBOF1	7:97316767-97359907	1593	0.0515888	0.0877067	0.0160673	0.0610142	0.018428	0
ENSSSCT00000002621	ENSSSCG00000002357	ALDH6A1	7:97360539-97381889	4668	5.0373	7.09395	6.32184	4.68871	4.29492	4.35189
ENSSSCT00000002630	ENSSSCG00000002366	NPC2	7:97730515-97740331	1484	79.9516	55.9406	64.4333	87.8407	53.3802	70.5074
ENSSSCT00000002631	ENSSSCG00000002367	ISCA2	7:97739899-97743911	1139	0.855484	1.15652	1.15446	1.01661	1.02578	1.15719
ENSSSCT00000002632	ENSSSCG00000002368	LTBP2	7:97746111-97852462	7667	0.699725	4.10221	0.852387	3.90798	2.21726	3.07969
ENSSSCT00000002634	ENSSSCG00000002370	AREL1	7:97893188-97940898	5938	0.052751	0.386961	0.00095393	0.693635	0.000461726	0.56195
ENSSSCT00000002636	ENSSSCG00000002372	YLPM1	7:97976136-98042230	7079	1.48255	2.28283	1.78545	2.86807	2.83894	3.16339
ENSSSCT00000002638	ENSSSCG00000002373	PROX2	7:98065527-98074822	1761	0.230897	0.17267	0.100629	0.36857	0.214389	0.288574
ENSSSCT00000002639	ENSSSCG00000002374	DLST	7:98090812-98112213	3838	2.50701	5.32413	2.63557	5.55743	4.83439	5.10232
ENSSSCT00000002640	ENSSSCG00000002375	RPS6KL1	7:98109891-98131802	6130	0.000119875	0.000124545	0.000112578	0.44775	0.000147025	0.000126487
ENSSSCT00000002642	ENSSSCG00000002376	PGF	7:98155571-98162390	492	4.66331	7.47052	6.53261	4.56586	5.6777	5.80472
ENSSSCT00000002643	ENSSSCG00000002377	EIF2B2	7:98203814-98210407	1560	33.405	31.0019	31.8361	22.2809	26.8643	24.2242
ENSSSCT00000002644	ENSSSCG00000002378	MLH3	7:98220554-98245330	4200	2.73144e-07	0.0465116	5.88178e-07	1.01151e-08	0.0803371	1.89314e-09
ENSSSCT00000002646	ENSSSCG00000002379	-	7:98249702-98265153	848	1.09294	1.71863	0.843785	1.59274	1.0586	1.28283
ENSSSCT00000002647	ENSSSCG00000002380	ZC2HC1C	7:98265273-98273351	2810	0.0462701	0.162834	0.0376234	2.34481e-07	0.0326613	1.36816e-07
ENSSSCT00000002648	ENSSSCG00000002381	NEK9	7:98275978-98322250	6560	4.88149	8.29764	5.201	7.44004	7.51247	7.39549
ENSSSCT00000002650	ENSSSCG00000002383	FOS	7:98449507-98453576	2748	1.48591	8.10796	6.01273	8.35661	6.2047	7.10279
ENSSSCT00000002651	ENSSSCG00000025984	TTLL5	7:98823900-99058694	3858	2.00848	3.5674	2.73674	3.39979	3.07502	3.53437
ENSSSCT00000002652	ENSSSCG00000002385	TGFB3	7:99133510-99153979	3730	0.106731	0.121214	0.0325209	0.1031	0.0698448	0.0780898
ENSSSCT00000002653	ENSSSCG00000002386	IFT43	7:99158552-99254302	988	3.77741	5.71593	4.29437	3.72644	4.05521	4.05045
ENSSSCT00000002654	ENSSSCG00000002387	GPATCH2L	7:99325601-99375179	2814	0.176063	0.512287	0.300737	0.150378	0.0551816	0.130288
ENSSSCT00000002655	ENSSSCG00000002388	ESRRB	7:99581145-99699775	4950	0.143253	0.124881	0.119032	0.208919	0.136734	0.14373
ENSSSCT00000002656	ENSSSCG00000002389	VASH1	7:99910939-99929766	6450	1.24543	1.60528	0.579699	1.11474	1.92863	1.68734
ENSSSCT00000002657	ENSSSCG00000002390	ANGEL1	7:99935141-99959567	2226	2.60085	3.7572	3.84033	3.63782	3.8582	3.59926
ENSSSCT00000002660	ENSSSCG00000002392	IRF2BPL	7:100120138-100122489	2319	0.000477023	1.55454	1.35199	0.000424486	0.000509128	0.000442099
ENSSSCT00000002664	ENSSSCG00000002396	GSTZ1	7:100392212-100404023	2335	1.84729	1.63974	0.99867	1.84877	1.97648	2.1971
ENSSSCT00000002665	ENSSSCG00000002397	POMT2	7:100348884-100392133	6755	0.794342	0.875054	0.566771	0.942111	0.935744	1.02975
ENSSSCT00000002666	ENSSSCG00000002398	TMEM63C	7:100263559-100334297	5635	2.133e-06	0.0961861	0.0921812	0.118661	0.2368	0.0981197
ENSSSCT00000002667	ENSSSCG00000002399	NGB	7:100340833-100346797	2130	0.0701627	0.13045	0.098767	1.65333e-05	0.0500682	0.072338
ENSSSCT00000002668	ENSSSCG00000002400	SAMD15	7:100449596-100463614	1830	0.0442726	0.168427	0.275588	0.240101	0.363601	0.28244
ENSSSCT00000002672	ENSSSCG00000002403	VIPAS39	7:100482956-100510099	2437	2.83344	3.39557	4.25686	2.70496	2.80584	2.80816
ENSSSCT00000002673	ENSSSCG00000002404	SPTLC2	7:100544478-100638978	6652	5.65629	2.94591	2.24232	2.26162	3.48468	3.37703
ENSSSCT00000002674	ENSSSCG00000002405	-	7:100525780-100526377	597	0	0	0	0	0.0606533	0.0530515
ENSSSCT00000002675	ENSSSCG00000002406	AHSA1	7:100510225-100522161	3579	3.1223	4.27382	3.79641	4.47764	4.76874	4.36831
ENSSSCT00000002677	ENSSSCG00000002408	ADCK1	7:100777133-100901052	1616	0.0442162	1.98103e-20	0.0898236	0.0723092	0.140604	0.130234
ENSSSCT00000002678	ENSSSCG00000002409	-	7:100934985-100935249	264	0	0	0	0	0.257663	0.225197
ENSSSCT00000002679	ENSSSCG00000002410	CEP128	7:103562230-103757966	3183	0.000120479	0.000223348	0.000109117	1.73034e-05	8.74231e-05	2.09731e-05
ENSSSCT00000002680	ENSSSCG00000002411	GTF2A1	7:103963244-104009302	6257	2.83096	3.75411	2.64325	3.69906	3.08863	3.35356
ENSSSCT00000002681	ENSSSCG00000002412	STON2	7:104039954-104190377	3696	1.6411	1.86268	1.31169	2.27851	2.06375	2.12495
ENSSSCT00000002683	ENSSSCG00000002414	SEL1L	7:104219630-104283178	6454	10.1768	9.95236	8.40309	10.3717	11.1255	10.7771
ENSSSCT00000002693	ENSSSCG00000002424	SPATA7	7:110309461-110364033	2006	1.35903	1.34743	1.01667	1.03092	0.987115	1.01086
ENSSSCT00000002694	ENSSSCG00000002425	PTPN21	7:110377095-110449557	3525	1.43889	2.82036	1.76144	2.65422	2.65786	2.5647
ENSSSCT00000002695	ENSSSCG00000002426	ZC3H14	7:110463561-110513256	2781	6.39892	4.6957	4.06529	3.8295	3.9957	4.08439
ENSSSCT00000002696	ENSSSCG00000002427	EML5	7:110513671-110705002	5877	0.759085	0.737537	0.694739	0.729428	0.461346	0.55707
ENSSSCT00000002697	ENSSSCG00000002428	TTC8	7:110731667-110784853	3029	0.281699	0.304305	0.387311	0.309989	0.356233	0.312342
ENSSSCT00000002698	ENSSSCG00000002429	FOXN3	7:111041500-111453936	3223	0.031174	0.0968286	0.106609	0.0131266	0.394393	0.106764
ENSSSCT00000002700	ENSSSCG00000002430	EFCAB11	7:111577723-111766344	709	3.82912	3.01703	1.94117	2.07549	1.6397	1.68742
ENSSSCT00000002701	ENSSSCG00000002431	TDP1	7:111767428-111854907	4183	0.570326	0.94848	1.07902	0.434237	0.740965	0.619642
ENSSSCT00000002702	ENSSSCG00000002432	KCNK13	7:111866982-111980485	1995	0.0805885	0.136924	0.125369	0.190526	0.1007	0.151039
ENSSSCT00000002703	ENSSSCG00000002433	PSMC1	7:112027865-112045308	5541	2.90972	5.16813	3.20013	4.17929	4.21543	4.29319
ENSSSCT00000002704	ENSSSCG00000002434	NRDE2	7:112039779-112090542	6665	1.49729	2.32255	1.70801	3.09275	3.16446	3.19991
ENSSSCT00000002706	ENSSSCG00000002436	TTC7B	7:112268300-112519208	5304	0.610416	0.869323	0.232764	0.453547	0.657586	0.35997
ENSSSCT00000002707	ENSSSCG00000024377	RPS6KA5	7:112563600-112753617	2855	1.18598e-05	4.50299e-05	0.15563	0.154408	6.19132e-05	9.67882e-05
ENSSSCT00000002708	ENSSSCG00000002438	-	7:112831658-112872994	1647	0	0	0	0.000573837	0.000693257	0.000600006
ENSSSCT00000002710	ENSSSCG00000002440	-	7:112918534-112992186	5745	0.489061	0.930807	0.425602	1.44378	1.07228	1.10081
ENSSSCT00000002711	ENSSSCG00000002441	PPP4R3A	7:113111302-113148986	5126	3.14184	4.53897	3.01382	5.08782	4.97168	5.09504
ENSSSCT00000002713	ENSSSCG00000002443	TC2N	7:113337824-113392337	4054	4.64869	1.64097	0.621243	5.76496	0.0242345	2.38238
ENSSSCT00000002714	ENSSSCG00000002444	FBLN5	7:113423631-113511491	2463	4.1636	3.61229	2.70399	4.44663	4.9447	4.73556
ENSSSCT00000002715	ENSSSCG00000002445	TRIP11	7:113527468-113597925	6067	2.4874	2.63171	2.2242	2.04662	2.75594	2.54156
ENSSSCT00000002716	ENSSSCG00000002446	ATXN3	7:113608780-113645844	5557	5.88443	6.87815	5.3943	5.40482	4.94088	5.14852
ENSSSCT00000002717	ENSSSCG00000002447	CPSF2	7:113659451-113691241	4180	1.84239	1.91676	0.902509	1.3534	1.57434	1.01127
ENSSSCT00000002719	ENSSSCG00000002449	-	7:113652773-113659672	347	18.3442	14.7151	16.7994	13.2216	9.8462	11.1035
ENSSSCT00000002720	ENSSSCG00000002450	SLC24A4	7:113836229-114014949	9262	0.0243829	0.0468675	0.0277361	0.050366	0.0463567	0.0456324
ENSSSCT00000002721	ENSSSCG00000002451	RIN3	7:114035412-114166547	3549	0.195783	0.542119	0.395275	0.543392	0.755714	0.654603
ENSSSCT00000002722	ENSSSCG00000002452	LGMN	7:114175182-114210028	3096	1.21256e-27	0.0225589	0.0203889	3.52103e-19	0.0234648	1.25167e-28
ENSSSCT00000002723	ENSSSCG00000002452	LGMN	7:114176226-114210039	1857	14.2485	24.7235	12.761	30.1941	22.0942	27.2044
ENSSSCT00000002725	ENSSSCG00000002455	GOLGA5	7:114238769-114273526	2409	7.61115	6.89233	6.46692	5.13173	6.03222	6.06118
ENSSSCT00000002726	ENSSSCG00000002456	CHGA	7:114345090-114358571	2891	0	0	0.0168309	0	0	0
ENSSSCT00000002728	ENSSSCG00000002457	ITPK1	7:114363705-114520179	1393	0.090253	1.69984e-24	5.75771e-13	8.0553e-15	1.6844e-18	7.37544e-14
ENSSSCT00000002729	ENSSSCG00000002458	TMEM251	7:114574138-114575889	1316	5.11503	5.56935	4.6849	5.75033	4.89045	5.07832
ENSSSCT00000002730	ENSSSCG00000002459	GON7	7:114586305-114590804	600	8.2176	9.01092	9.02632	7.82659	7.58993	7.85051
ENSSSCT00000002731	ENSSSCG00000002460	UBR7	7:114590944-114609858	3403	2.6477	3.09076	2.01527	3.29275	2.50197	2.60794
ENSSSCT00000002732	ENSSSCG00000002461	BTBD7	7:114619395-114707051	6259	3.15346	4.20965	3.1543	3.7587	3.51141	3.76868
ENSSSCT00000002736	ENSSSCG00000002464	PRIMA1	7:115038478-115100924	4200	0.0488223	0.124275	0.0284253	0.140533	0.143651	0.142832
ENSSSCT00000002739	ENSSSCG00000002467	ASB2	7:115210891-115258654	2539	0.36633	0.578055	0.480104	0.439769	0.60119	0.519322
ENSSSCT00000002741	ENSSSCG00000002469	OTUB2	7:115304814-115326047	3447	1.11005	2.78041	2.29259	6.43821	3.45139	5.04248
ENSSSCT00000002742	ENSSSCG00000002470	DDX24	7:115328118-115348745	2964	8.30265	12.0782	11.1293	13.035	10.4921	11.7544
ENSSSCT00000002743	ENSSSCG00000035297	ISG12(A)	7:115356616-115361534	677	7.02926	6.03646	3.46314	8.89945	2.35154	6.06081
ENSSSCT00000002745	ENSSSCG00000002472	-	7:115367849-115369991	243	3.19145	14.8264	6.95543	12.2387	6.43214	8.15097
ENSSSCT00000002748	ENSSSCG00000002474	PPP4R4	7:115472628-115522683	3390	0.19811	0.539039	0.258051	1.05568	0.239485	0.679944
ENSSSCT00000002749	ENSSSCG00000002475	SERPINA6	7:115535553-115553040	2287	0.00580635	0.0413816	0.010834	0.0257332	0.0248721	0.0272003
ENSSSCT00000002750	ENSSSCG00000002476	SERPINA1	7:115604298-115609726	1344	5.41037	7.85862	6.46141	9.86159	5.91244	7.72981
ENSSSCT00000002752	ENSSSCG00000022251	UABP-2	7:115685847-115696611	1390	0.0389353	0	0	0	0	0
ENSSSCT00000002754	ENSSSCG00000002479	SERPINA11	7:115665948-115682043	1852	0.150896	1.51831	2.57646	1.17493e-05	0.479156	0.14028
ENSSSCT00000002756	ENSSSCG00000022251	UABP-2	7:115685834-115696616	1407	0.00111265	0	0	0	0	0
ENSSSCT00000002768	ENSSSCG00000002490	GSC	7:116099046-116100966	1143	0.0501181	0.102382	0.11732	0.089008	0.053768	0.0705593
ENSSSCT00000002772	ENSSSCG00000002494	CLMN	7:116476788-116590181	4212	0.352913	0.427478	0.311751	0.673638	0.891906	0.746221
ENSSSCT00000002773	ENSSSCG00000002495	SYNE3	7:116672602-116730027	2916	1.96236e-89	6.91126e-35	3.34214e-07	0.0602317	1.53437e-62	1.69841e-71
ENSSSCT00000002774	ENSSSCG00000002496	GLRX5	7:116787340-116797488	1056	2.39155	2.92125	3.01348	3.10108	2.4486	3.07127
ENSSSCT00000002779	ENSSSCG00000002501	BDKRB1	7:117491349-117492410	1061	0.0820101	0.363123	0.10245	0.315667	0.352044	0.307985
ENSSSCT00000002780	ENSSSCG00000002502	ATG2B	7:117508095-117586174	6132	4.41309	5.17114	6.14415	5.35522	6.23628	5.4329
ENSSSCT00000002782	ENSSSCG00000002504	AK7	7:117609839-117667455	2847	0.0550465	0.028038	0.26516	0.0487741	0.0392814	0.0429621
ENSSSCT00000002783	ENSSSCG00000002505	-	7:117676397-117741911	2767	3.79057	5.3314	4.20196	5.973	5.60482	6.03377
ENSSSCT00000002784	ENSSSCG00000002506	VRK1	7:117942772-118025596	1587	0.138161	0.239494	0.256706	0.237208	0.260134	0.289808
ENSSSCT00000002785	ENSSSCG00000002507	BCL11B	7:120205007-120295737	2669	0	0.140138	0.128264	0.0348249	0.105177	0.101228
ENSSSCT00000002786	ENSSSCG00000002508	SETD3	7:120412548-120486591	2734	5.77313	6.41712	5.36427	5.77862	5.75835	5.93486
ENSSSCT00000002787	ENSSSCG00000002509	CCNK	7:120486731-120513217	2054	0.962982	0.769379	0.935181	1.75355	1.6167	1.76814
ENSSSCT00000002788	ENSSSCG00000002510	CYP46A1	7:120661110-120695043	2276	0.0116487	0.0474861	0.0434708	0	0.0124733	0.0109134
ENSSSCT00000002790	ENSSSCG00000002512	DEGS2	7:121056094-121076248	3394	8.47782e-08	0.279496	0.156033	0.715833	0.807655	0.806608
ENSSSCT00000002793	ENSSSCG00000002515	SLC25A47	7:121192449-121210374	1548	0.124273	0.253557	0.199084	0.157489	0.133185	0.116525
ENSSSCT00000002794	ENSSSCG00000002516	WARS	7:121212980-121238106	1826	4.4937e-05	0.417221	2.12646	2.6448	1.39844	1.80541
ENSSSCT00000002795	ENSSSCG00000002517	WDR25	7:121238255-121384220	1848	0.39084	0.772479	0.583828	0.865154	0.904166	0.896753
ENSSSCT00000002799	ENSSSCG00000002520	SLC25A29	7:121174888-121192328	5736	1.45742	2.43117	2.15044	0.71417	0.572798	0.797533
ENSSSCT00000002802	ENSSSCG00000002523	CDC42BPB	AEMK02000452.1:1650034-1752123	6340	3.92452	5.4402	4.09669	7.66368	7.55578	7.83514
ENSSSCT00000002803	ENSSSCG00000002524	AMN	AEMK02000452.1:1630544-1639325	1685	3.89832e-05	4.07852e-05	3.89207e-05	3.87773e-05	4.4716e-05	3.82257e-05
ENSSSCT00000002805	ENSSSCG00000002526	RCOR1	AEMK02000452.1:1330769-1469632	5827	1.2705	1.83355	1.32477	2.31933	1.99664	1.99546
ENSSSCT00000002807	ENSSSCG00000002528	TECPR2	AEMK02000452.1:1174604-1254233	4080	1.15099	1.37688	1.18359	1.49851	1.55454	1.61927
ENSSSCT00000002808	ENSSSCG00000002529	-	AEMK02000452.1:1167882-1168227	345	3.04603	0.137745	0.127716	0.358016	0	0.12612
ENSSSCT00000002809	ENSSSCG00000002530	CINP	AEMK02000452.1:1141193-1153145	943	7.51739	9.87245	6.17342	7.65313	7.14618	7.59868
ENSSSCT00000002810	ENSSSCG00000002531	MOK	AEMK02000452.1:1045932-1098921	1395	0.143545	0.503649	0.420217	0.164831	0.524666	0.329372
ENSSSCT00000002812	ENSSSCG00000002532	-	AEMK02000452.1:1125651-1137334	2561	2.09441	2.13397	2.15432	1.92882	2.19825	2.10609
ENSSSCT00000002813	ENSSSCG00000002533	WDR20	AEMK02000452.1:977312-1034923	2039	1.59291	2.35198	2.14898	1.3211	2.16318	1.84682
ENSSSCT00000002815	ENSSSCG00000002535	HSP90AA1	AEMK02000452.1:916988-922499	3049	28.8307	71.217	45.7498	95.0757	91.39	92.8759
ENSSSCT00000002816	ENSSSCG00000002536	-	AEMK02000452.1:890191-894014	633	0	0.0533652	0.0490596	0.0927133	0	0.0979905
ENSSSCT00000002821	ENSSSCG00000002540	PPP2R5C	AEMK02000452.1:715079-797055	1503	15.5824	15.4264	16.3092	13.4045	15.9033	14.6118
ENSSSCT00000002822	ENSSSCG00000002541	-	AEMK02000452.1:733892-734406	438	0.441678	0.820736	0.336637	0.47474	0.765019	0.50174
ENSSSCT00000002825	ENSSSCG00000002544	PPP1R13B	AEMK02000452.1:2237704-2331416	4351	1.28067	2.02649	1.90976	2.28712	2.12459	2.35141
ENSSSCT00000002829	ENSSSCG00000002546	XRCC3	AEMK02000452.1:2217695-2229207	2500	0.842737	1.89986	1.02179	1.90446	1.96238	2.00316
ENSSSCT00000002830	ENSSSCG00000002547	KLC1	AEMK02000452.1:2164009-2219988	2034	0.232602	1.20598	0.502605	0.831767	0.3334	0.832048
ENSSSCT00000002833	ENSSSCG00000002550	-	AEMK02000452.1:2383281-2389269	540	34.3561	52.0239	32.5805	36.0464	35.0427	36.0827
ENSSSCT00000002836	ENSSSCG00000002552	TDRD9	AEMK02000452.1:2394153-2478527	4155	0	0.00628379	0	0	0.0066032	0
ENSSSCT00000002839	ENSSSCG00000002554	PLD4	AEMK02000452.1:3137040-3144117	1896	1.7102	1.21688	0.72168	1.68943	1.27135	1.64252
ENSSSCT00000002840	ENSSSCG00000002555	JAG2	AEMK02000452.1:3262094-3276823	4422	0.0631971	0.215818	0.0903921	0.677141	0.325025	0.578546
ENSSSCT00000002842	ENSSSCG00000002557	NUDT14	AEMK02000452.1:3289305-3296905	1122	1.71556	2.01401	2.13414	2.13745	1.64834	1.77854
ENSSSCT00000002843	ENSSSCG00000002558	CEP170B	AEMK02000452.1:3108920-3129326	4716	1.26356	0.554671	0.451867	0.929738	1.11729	1.19172
ENSSSCT00000002844	ENSSSCG00000002559	CDCA4	AEMK02000452.1:3187970-3188609	639	0.873147	1.4227	1.06564	1.46475	1.32742	1.49974
ENSSSCT00000002847	ENSSSCG00000036968	-	7:79821605-79822541	936	0	0.0162245	0	0.0282046	0	0.0149056
ENSSSCT00000002850	ENSSSCG00000034613	-	7:79600763-79601696	933	0.0318565	0.0651508	0.0597676	0.0283144	0	0
ENSSSCT00000002853	ENSSSCG00000040427	-	AEMK02000253.1:62452-63409	957	0.0257488	0.0105303	0	0.0137297	0	0
ENSSSCT00000002856	ENSSSCG00000039773	-	AEMK02000410.1:44377-45302	879	0	0	0	0.000236458	0	0.000249925
ENSSSCT00000002858	ENSSSCG00000002573	-	7:121707340-121711414	4074	0.00629918	0	0.00586833	0.0111584	0	0
ENSSSCT00000002863	ENSSSCG00000037356	-	AEMK02000412.1:46772-47799	879	0	0	0.0321454	0	0	0
ENSSSCT00000002865	ENSSSCG00000002579	-	AEMK02000661.1:67746-68702	956	0	0	0	0.13747	0	0.0290601
ENSSSCT00000002871	ENSSSCG00000002585	-	7:79424015-79424951	936	0.0317335	0	0	0.0282046	0.0340769	0
ENSSSCT00000002876	ENSSSCG00000002589	-	AEMK02000336.1:50783-51710	927	0	0	0	0.0142683	0.0114927	0.010054
ENSSSCT00000002881	ENSSSCG00000002594	OR4K5	AEMK02000410.1:197904-198870	966	0.0305541	0	0	0	0	0
ENSSSCT00000002883	ENSSSCG00000033073	-	AEMK02000410.1:248801-249746	945	0	0.0320756	0	0.223043	0	0.206279
ENSSSCT00000002884	ENSSSCG00000037414	-	7:79022309-79023267	933	0.0265471	0.0108585	0	0	0	0
ENSSSCT00000002887	ENSSSCG00000002600	-	7:78987649-78988581	932	0	0	0	0	0.034254	0
ENSSSCT00000002888	ENSSSCG00000002601	-	7:78966747-78967683	936	0	0.032449	0	0.0282046	0	0.0298112
ENSSSCT00000002889	ENSSSCG00000033484	-	7:78880374-78881319	945	0	0	0	0	0.0168425	0.0147342
ENSSSCT00000002892	ENSSSCG00000034005	-	AEMK02000661.1:325102-326050	948	0	0	0	0.013887	0	0
ENSSSCT00000002895	ENSSSCG00000002608	-	7:78856610-78857570	960	0	0	0	0.0273562	0	0
ENSSSCT00000002900	ENSSSCG00000002613	-	7:78825437-78826370	933	0	0	0	0.0141572	0	0
ENSSSCT00000002901	ENSSSCG00000034959	-	7:78951721-78952666	945	0	0	0	0	0.0168425	0.0147342
ENSSSCT00000002905	ENSSSCG00000002618	-	7:78757246-78758175	929	0	0.0436607	0	0.0284621	0	0
ENSSSCT00000002907	ENSSSCG00000002620	EFHC1	7:46244921-46320257	2248	0.448583	0.495849	0.414398	0.199441	0.263271	0.265389
ENSSSCT00000002909	ENSSSCG00000002622	TMEM14A	7:46509771-46517724	1269	2.88543	3.85209	2.90672	0.736475	1.81471	1.18182
ENSSSCT00000002911	ENSSSCG00000002623	GSTA1	7:46538643-46567966	1622	0	0	0.00393686	0	0	0
ENSSSCT00000002914	ENSSSCG00000002623	GSTA1	7:46538643-46567966	1622	0	0	0.00393686	0	0	0
ENSSSCT00000002915	ENSSSCG00000002627	GSTA4	7:46635903-46656452	1753	0.912748	0.830293	0.351374	0.489418	0.850764	0.536886
ENSSSCT00000002916	ENSSSCG00000002628	ICK	7:46662257-46701044	1890	1.39611	2.44017	1.64923	2.45052	2.59421	2.52343
ENSSSCT00000002917	ENSSSCG00000002629	FBXO9	7:46723397-46748126	2379	10.0864	7.04088	6.17575	7.22636	7.3503	7.27405
ENSSSCT00000002921	ENSSSCG00000002632	SLC28A1	7:52606448-52652954	3141	0	0.00841444	0.00770038	0.0219799	0.0531063	0.0464662
ENSSSCT00000002922	ENSSSCG00000002633	GAS8	6:86822-105993	4734	0.862477	0.900007	1.03925	1.09797	1.27449	1.26906
ENSSSCT00000002924	ENSSSCG00000002635	SPIRE2	6:209017-243609	5453	1.00562	1.2582	0.937237	1.40023	1.28236	1.43973
ENSSSCT00000002927	ENSSSCG00000002637	-	6:112233-118086	480	1.30536	1.34495	1.53138	1.23605	1.24482	0.580609
ENSSSCT00000002929	ENSSSCG00000002639	TUBB3	6:168451-178462	2438	0.0360692	0.0854529	0.0698097	0.106608	0.0496238	0.0839647
ENSSSCT00000002930	ENSSSCG00000002640	DEF8	6:147136-167459	1862	1.75368	1.199	2.30016	0.992208	2.23831	1.38282
ENSSSCT00000002932	ENSSSCG00000002642	CDH15	6:632774-652160	6187	0.0367613	0.0499101	0.0646993	0.0289281	6.71635e-06	0.0535515
ENSSSCT00000002935	ENSSSCG00000002645	GALNS	6:869232-890136	2456	1.23463	3.83664	2.07752	6.15842	5.84364	5.78444
ENSSSCT00000002936	ENSSSCG00000002646	TRAPPC2L	6:865500-868952	1081	11.0517	16.8824	15.6665	11.8434	11.8867	12.1207
ENSSSCT00000002938	ENSSSCG00000002648	CBFA2T3	6:830825-852821	1893	0.227457	0.202911	0.145967	0.000469203	0.472153	0.306474
ENSSSCT00000002941	ENSSSCG00000002650	APRT	6:890902-893277	869	3.19492	5.89767	5.37939	5.40369	5.11116	5.25454
ENSSSCT00000002942	ENSSSCG00000002651	CDT1	6:893380-897266	2102	0.266524	0.04745	0.0739453	0.359999	0.123372	0.200473
ENSSSCT00000002943	ENSSSCG00000002652	KLHDC4	6:1627029-1677130	5868	2.67395	2.00944	1.98695	3.62229	3.82597	3.752
ENSSSCT00000002944	ENSSSCG00000002653	JPH3	6:1678397-1766559	2187	0.000372453	0.000384028	0.0567281	0.0107787	0.0260431	0.0113931
ENSSSCT00000002945	ENSSSCG00000002654	FBXO31	6:1949260-1991692	1572	1.2277	1.51472	1.15321	1.68722	2.10149	2.09601
ENSSSCT00000002946	ENSSSCG00000002655	MAP1LC3B	6:1917492-1941079	4006	4.89806	7.09527	5.11574	6.41369	5.55412	6.24356
ENSSSCT00000002947	ENSSSCG00000002656	ZCCHC14	6:1849978-1914668	3261	1.35166e-07	0.0140343	0.0462454	7.68271e-07	0.0567038	0.0369257
ENSSSCT00000002948	ENSSSCG00000002657	-	6:2001722-2011713	591	0.114132	0.0586011	0.107804	0.0508972	0.0615022	0.107587
ENSSSCT00000002949	ENSSSCG00000002658	FOXL1	6:2542674-2543691	1017	0	0.0293715	0.0269359	0.025532	0	0
ENSSSCT00000002951	ENSSSCG00000002660	MTHFSD	6:2561222-2580461	1319	0.77532	0.979609	0.807316	1.11824	1.37807	1.22453
ENSSSCT00000002955	ENSSSCG00000002664	GSE1	6:3246852-3349122	5154	0.681165	0.585057	0.506368	0.692379	0.733729	0.691279
ENSSSCT00000002957	ENSSSCG00000002666	KIAA0513	6:3726751-3746892	4275	0.00054271	9.0406e-05	1.13096e-06	7.13866e-05	8.35376e-05	6.5934e-05
ENSSSCT00000002958	ENSSSCG00000002667	ZDHHC7	6:3786337-3817952	2824	2.13648	3.28656	2.40812	2.83126	4.7346	4.70486
ENSSSCT00000002960	ENSSSCG00000002669	CRISPLD2	6:3894079-3929464	1439	1.12106	2.14535	1.46167	3.95859	3.4354	3.47164
ENSSSCT00000002961	ENSSSCG00000002670	USP10	6:3977230-4043533	3360	1.72574	2.21267	1.96731	3.0644	3.00938	2.90004
ENSSSCT00000002962	ENSSSCG00000002671	ATP2C2	6:4240667-4313279	3264	7.65643	5.55732	7.29137	6.45217	12.6991	9.34123
ENSSSCT00000002963	ENSSSCG00000002672	TLDC1	6:4214817-4225389	1224	0.137505	6.20006e-05	7.76808e-05	0.042786	1.85997e-09	2.82868e-06
ENSSSCT00000002964	ENSSSCG00000034385	ADAD2	6:4437940-4443805	1674	5.68757e-06	0	0	0	0	0
ENSSSCT00000002967	ENSSSCG00000002675	DNAAF1	6:4457290-4479828	2331	0.0340614	0.138844	0.0741417	0.0402523	0.0972555	0.0425467
ENSSSCT00000002970	ENSSSCG00000034385	ADAD2	6:4437940-4445546	1449	0.0191089	0	0	0	0	0
ENSSSCT00000002973	ENSSSCG00000002680	TAF1C	6:4451209-4457089	3231	0.634186	1.26732	0.867922	1.12367	1.19421	1.15014
ENSSSCT00000002974	ENSSSCG00000002681	HSDL1	6:4479916-4502007	4012	2.61135	4.70345	3.43761	2.69184	3.00885	2.84522
ENSSSCT00000002975	ENSSSCG00000002682	MBTPS1	6:4503478-4558028	3535	3.51014	6.56255	4.73878	6.60282	6.57763	6.7338
ENSSSCT00000002977	ENSSSCG00000002684	CDH13	6:4809106-5518799	2678	3.75462	4.9201	3.7175	10.8967	9.33547	10.3294
ENSSSCT00000002981	ENSSSCG00000002688	PLCG2	6:6433142-6603090	8219	0.734256	0.849922	0.579489	1.25554	1.32846	1.28844
ENSSSCT00000002982	ENSSSCG00000002689	CMIP	6:6654408-6701734	2892	0.387891	0.224948	0.561642	0.199536	0.616062	0.442985
ENSSSCT00000002983	ENSSSCG00000002690	GAN	6:6931563-6989675	4782	5.92131	19.7573	9.74791	20.9896	19.7861	19.9691
ENSSSCT00000002989	ENSSSCG00000002696	VAT1L	6:9957502-10120510	4066	0.220923	0.25387	0.15289	0.14163	0.298693	0.23933
ENSSSCT00000002991	ENSSSCG00000002697	NUDT7	6:10161959-10173980	1086	3.13875	4.97321	4.13619	5.3865	2.39761	3.32113
ENSSSCT00000002995	ENSSSCG00000002701	MON1B	6:10713723-10725182	5608	3.22604e-05	0.272393	0.0485293	0.0406865	0.291504	0.100556
ENSSSCT00000002997	ENSSSCG00000002703	-	6:12047011-12057342	2567	7.14831	7.52329	6.78585	6.41639	5.93143	6.7054
ENSSSCT00000002998	ENSSSCG00000002704	KARS	6:12057523-12073748	2199	32.0408	71.4784	53.3052	58.4843	49.6339	55.4024
ENSSSCT00000003000	ENSSSCG00000002706	ADAT1	6:12076389-12103231	1839	0.469464	0.963327	0.64222	0.672862	1.06037	0.615768
ENSSSCT00000003001	ENSSSCG00000002707	GABARAPL2	6:12122056-12132991	1168	32.3318	33.8941	36.2858	21.4819	25.3768	23.2563
ENSSSCT00000003002	ENSSSCG00000002708	-	6:12140686-12164140	2754	1.06436	0.687384	0.744311	0.58945	0.935892	0.685356
ENSSSCT00000003003	ENSSSCG00000002709	-	6:12166240-12188813	3403	0.0684185	0	0.0495921	0.00673439	0.0569483	0.0427098
ENSSSCT00000003006	ENSSSCG00000002712	LDHD	6:12548130-12552242	2005	18.6997	4.2575	12.4841	3.51814	3.56183	3.24814
ENSSSCT00000003008	ENSSSCG00000002714	WDR59	6:12682198-12769299	3523	0.756682	0.571082	0.636252	0.461259	0.0479707	0.470379
ENSSSCT00000003009	ENSSSCG00000002715	RFWD3	6:12952240-12994052	4810	1.14002	1.55465	1.33831	1.58716	1.5316	1.47414
ENSSSCT00000003010	ENSSSCG00000002716	MLKL	6:12930411-12948362	1338	0.556169	0.488381	0.390573	0.410494	0.89201	0.609493
ENSSSCT00000003012	ENSSSCG00000002718	FA2H	6:12855420-12909499	1092	0	0.108002	0.0990219	0.0469451	0.0283588	0.0496196
ENSSSCT00000003013	ENSSSCG00000002719	EXOSC6	6:13296054-13296873	819	0.14943	0.382358	0.280774	0.29906	0.160594	0.245849
ENSSSCT00000003016	ENSSSCG00000002722	DDX19B	6:13328252-13354829	1810	2.69761	3.251	2.97258	3.84864	2.42994	3.20255
ENSSSCT00000003017	ENSSSCG00000002723	-	6:13298697-13317903	2880	7.29584	9.86954	8.22987	10.0299	9.50708	10.0457
ENSSSCT00000003018	ENSSSCG00000002724	PDPR	6:13187421-13230598	5765	0.303206	1.1193	1.00164	1.73789	0.240222	0.200496
ENSSSCT00000003024	ENSSSCG00000002729	-	6:13683800-13791246	3106	2.69315	4.69646	3.79867	6.24367	5.80965	6.13333
ENSSSCT00000003029	ENSSSCG00000002734	MARVELD3	6:14616480-14630798	2153	3.20712	3.85644	5.06605	4.04067	3.57718	3.97866
ENSSSCT00000003030	ENSSSCG00000002734	MARVELD3	6:14616477-14625985	2080	2.35788	2.15987	1.78519	1.89389	1.85463	1.96848
ENSSSCT00000003032	ENSSSCG00000002736	TAT	6:14570588-14583189	3107	0.0334613	0.00852063	0.015595	0.148226	0	0.0940055
ENSSSCT00000003033	ENSSSCG00000002737	CHST4	6:14535890-14544437	1854	0.0147081	0.0708663	3.85185e-06	1.11527e-05	0.00328706	0.00136641
ENSSSCT00000003034	ENSSSCG00000002738	ZNF23	6:14463300-14473545	1905	1.00278	0.878384	1.43722	0.901644	0.726179	0.913324
ENSSSCT00000003035	ENSSSCG00000002739	PHLPP2	6:14637937-14670909	3252	0.43503	0.0273761	0.0774201	0.398914	0.368802	0.559276
ENSSSCT00000003036	ENSSSCG00000002740	AP1G1	6:14719952-14809756	6864	10.0045	11.3952	10.8955	11.2351	10.8618	10.9325
ENSSSCT00000003037	ENSSSCG00000002741	ZNF821	6:14850565-14870622	1749	2.08248e-05	0.429403	0.208193	0.479337	1.42116e-05	0.291447
ENSSSCT00000003039	ENSSSCG00000002743	-	6:14868902-14910662	2334	12.3415	18.33	16.7756	11.1584	13.213	13.3927
ENSSSCT00000003042	ENSSSCG00000002745	-	6:14913696-14913897	201	0	0.586948	0	0	0	0
ENSSSCT00000003043	ENSSSCG00000002746	-	6:14942932-14955990	1510	1.31419	2.53261	2.30299	1.21447	1.85848	1.62599
ENSSSCT00000003045	ENSSSCG00000002748	DHX38	6:14998070-15017174	5337	0.731788	1.31687	0.95611	1.85776	1.64022	1.59078
ENSSSCT00000003046	ENSSSCG00000002749	-	6:14981425-14985098	1044	249.574	1331.88	1658.47	2510.74	2126.55	2313.37
ENSSSCT00000003049	ENSSSCG00000002752	ZFHX3	6:15698297-16023169	12142	0.477476	0.703617	0.530489	1.07486	1.02336	1.03794
ENSSSCT00000003050	ENSSSCG00000002753	NOB1	6:17233845-17247471	3671	1.01116	1.38725	1.04033	1.71672	1.23982	1.51874
ENSSSCT00000003051	ENSSSCG00000002754	NQO1	6:17292769-17302627	1925	1.74547	2.81879	0.860352	3.63994	6.1324	5.07752
ENSSSCT00000003052	ENSSSCG00000002755	NFAT5	6:17315378-17362974	4541	2.74337	3.72308	2.05642	3.77597	3.12371	3.09147
ENSSSCT00000003053	ENSSSCG00000033944	CYB5B	6:17532072-17558011	636	5.95788	4.54094	4.73601	6.63306	4.28541	6.07494
ENSSSCT00000003056	ENSSSCG00000002759	-	6:17645551-17654740	4390	2.29983	2.00301	2.12583	2.3106	2.1091	2.19406
ENSSSCT00000003058	ENSSSCG00000002761	-	6:17634365-17641903	931	0.032635	0.137247	0.121692	0.146211	0.0342986	0.15493
ENSSSCT00000003059	ENSSSCG00000002762	TERF2	6:17605870-17634604	5432	1.50588	2.05573	1.81583	1.77607	1.74106	1.71968
ENSSSCT00000003061	ENSSSCG00000002763	PRMT7	6:28883668-28937301	2089	0.941432	1.45208	1.65646	1.42538	1.02258	1.66732
ENSSSCT00000003062	ENSSSCG00000002764	SMPD3	6:28938288-29025391	5273	3.70752e-109	1.67204e-44	0.00870985	3.57896e-195	4.46668e-135	4.00355e-296
ENSSSCT00000003065	ENSSSCG00000002767	TSNAXIP1	6:28428916-28450433	2493	0.0211316	0	0.0197089	0.0655455	0.0339358	0.0692818
ENSSSCT00000003066	ENSSSCG00000002768	CENPT	6:28446686-28456130	1590	0.420279	0.0175781	0.00881689	0.134563	0	0.0572228
ENSSSCT00000003067	ENSSSCG00000002769	THAP11	6:28465203-28467074	1871	5.77607	7.26975	5.95763	6.71807	6.21819	6.52047
ENSSSCT00000003069	ENSSSCG00000002771	EDC4	6:28489421-28501527	4851	2.49248	3.88451	3.36501	4.01422	4.76239	4.75617
ENSSSCT00000003072	ENSSSCG00000002774	RIPOR1	6:28164510-28180894	4012	0.184229	0.253964	0.281609	0.456925	0.477161	0.427776
ENSSSCT00000003073	ENSSSCG00000002775	AGRP	6:28132614-28133661	474	0	0	0	0	0.0845849	0.0739722
ENSSSCT00000003074	ENSSSCG00000002776	ATP6V0D1	6:28089646-28132085	2232	12.3361	11.7966	11.4654	11.2403	12.1907	12.0148
ENSSSCT00000003075	ENSSSCG00000002777	HSD11B2	6:28083954-28089672	1934	0.013893	0.0849837	0.0648465	0.270993	0.252978	0.208319
ENSSSCT00000003076	ENSSSCG00000002778	ZDHHC1	6:28050128-28072096	2343	0.103457	0.135489	0.0770934	0.115367	0.193253	0.165409
ENSSSCT00000003077	ENSSSCG00000002779	LRRC36	6:27966397-28038055	2271	0.455376	0.38079	0.337698	0.413976	0.362583	0.382876
ENSSSCT00000003078	ENSSSCG00000035983	TPPP3	6:28045436-28071540	3732	0.280492	0.459912	0.175012	0.374686	0.115064	0.275942
ENSSSCT00000003079	ENSSSCG00000002781	KCTD19	6:27932930-27960962	2787	0.0281516	0.00955971	0.0262479	0.0249445	0.0904036	0.0878883
ENSSSCT00000003080	ENSSSCG00000002782	PLEKHG4	6:27923815-27932035	3636	0.021278	0.0288913	0.0198268	0.00628269	0.0227693	0.00664086
ENSSSCT00000003081	ENSSSCG00000002783	SLC9A5	6:27884658-27903090	2706	0.0774581	0.0887778	0.0812544	0.0686368	0.155471	0.0997554
ENSSSCT00000003084	ENSSSCG00000002786	ELMO3	6:27841830-27846231	2142	6.23035	7.66857	7.61254	5.30242	6.45902	5.69786
ENSSSCT00000003085	ENSSSCG00000002787	E2F4	6:27832629-27840621	1289	0.954773	1.76768	0.776234	2.53904	1.8397	2.22471
ENSSSCT00000003086	ENSSSCG00000002788	EXOC3L1	6:27827346-27832454	2692	0.539824	0.627374	0.535541	0.838371	0.870276	0.802002
ENSSSCT00000003090	ENSSSCG00000002790	-	6:27864350-27867227	787	11.208	14.5791	13.5767	11.6083	14.3842	13.3171
ENSSSCT00000003092	ENSSSCG00000002792	HSF4	6:27809464-27813401	1437	4.49575	6.99949	4.9065	5.91501	6.66001	6.35161
ENSSSCT00000003093	ENSSSCG00000002793	-	6:27805811-27807788	1083	0.533719	0.436234	0.199986	0.663655	0.372268	0.55115
ENSSSCT00000003095	ENSSSCG00000002795	CDH11	6:25782755-25872995	5928	1.88245	2.1237	1.87901	2.99148	2.41854	2.73788
ENSSSCT00000003099	ENSSSCG00000002799	CNOT1	6:20272316-20372299	7308	7.8867	7.97661	7.10595	8.0865	8.47524	8.43912
ENSSSCT00000003101	ENSSSCG00000021911	NDRG4	6:20251957-20297225	3225	2.85206e-14	0.906802	0.148469	0.446722	0.146426	0.416553
ENSSSCT00000003102	ENSSSCG00000002802	GINS3	6:20162536-20171485	3373	0.352957	0.478181	0.17162	0.299082	0.313936	0.298509
ENSSSCT00000003103	ENSSSCG00000002803	CCDC113	6:20052734-20088815	4753	0.0912592	0.185815	0.154993	0.0855725	0.0804026	0.070351
ENSSSCT00000003104	ENSSSCG00000002804	CSNK2A2	6:19974665-20016754	1859	0.236102	0.581469	0.000344331	0.00010543	0.00112995	0.000137401
ENSSSCT00000003105	ENSSSCG00000002805	CFAP20	6:19948917-19969347	2768	2.19291	2.37847	1.604	2.03524	2.00338	2.00076
ENSSSCT00000003106	ENSSSCG00000002806	MMP15	6:19890883-19912935	4358	3.02015	4.71077	2.75466	4.07612	3.89362	3.86043
ENSSSCT00000003107	ENSSSCG00000002807	USB1	6:19852093-19873076	806	1.10513	0.93621	0.859417	1.83059	1.88413	1.97067
ENSSSCT00000003108	ENSSSCG00000002808	ZNF319	6:19845192-19851325	4079	0.515874	0.762284	0.650553	1.22586	0.827954	1.01893
ENSSSCT00000003109	ENSSSCG00000002809	TEPP	6:19832472-19838181	769	0	0	0.0380044	0	0	0
ENSSSCT00000003110	ENSSSCG00000002810	-	6:19829553-19829850	297	0	0	0	0	0.195402	0
ENSSSCT00000003111	ENSSSCG00000002811	CNGB1	6:19753035-19825631	3492	0.00739908	0.00753524	0.00689504	0.0196632	0.0237541	0.0207841
ENSSSCT00000003112	ENSSSCG00000002812	KIFC3	6:19660616-19692062	2883	1.02445	0.667364	0.53787	0.624582	1.43068	1.42206
ENSSSCT00000003113	ENSSSCG00000002813	KATNB1	6:19630458-19659033	2468	0.491903	0.545176	0.434066	0.948337	0.726039	0.892027
ENSSSCT00000003114	ENSSSCG00000002814	ADGRG3	6:19574584-19601100	4613	0.0110738	0.0732819	0.0412571	0.1373	0.0947791	0.124395
ENSSSCT00000003115	ENSSSCG00000002815	ADGRG1	6:19536340-19570889	3851	0.743072	3.51209	1.91976	6.07578	4.36107	4.86436
ENSSSCT00000003117	ENSSSCG00000002817	DRC7	6:19603447-19629173	2906	0.574552	0.38409	0.343145	0.286352	0.221011	0.227007
ENSSSCT00000003118	ENSSSCG00000002818	PLLP	6:19216839-19241227	1355	1.51983	1.99722	1.76948	1.61456	1.16115	1.63435
ENSSSCT00000003119	ENSSSCG00000002819	ARL2BP	6:19207007-19215025	2189	1.91937	2.15434	2.17631	1.97056	1.78219	1.86663
ENSSSCT00000003120	ENSSSCG00000002820	RSPRY1	6:19154418-19204824	3853	2.72382	3.84771	3.36504	2.91526	2.88599	2.93145
ENSSSCT00000003121	ENSSSCG00000002821	CCL22	6:19296636-19302737	2003	0	0.0817969	0	0.0118561	0	0
ENSSSCT00000003122	ENSSSCG00000002822	AMFR	6:29366818-29413697	3613	11.4648	13.7298	12.5874	12.148	12.0148	12.1808
ENSSSCT00000003123	ENSSSCG00000034192	GNAO1	6:29418806-29572622	934	1.19268e-09	1.64905e-08	3.1462e-08	8.18737e-09	1.11498e-05	5.70708e-07
ENSSSCT00000003125	ENSSSCG00000002825	-	6:29884249-29912913	1843	2.41619e-06	0	1.68831e-05	0.0218097	0	0.0115576
ENSSSCT00000003126	ENSSSCG00000002825	-	6:29884263-29912890	1706	0.041915	0	0.0148704	0.00937447	0	8.28298e-06
ENSSSCT00000003127	ENSSSCG00000039985	-	AEMK02000576.1:35883-109045	1275	4.0843e-294	0	0	0	0	0
ENSSSCT00000003128	ENSSSCG00000002827	SLC6A2	6:29935325-29980650	1854	0.0145486	0	0	0.0129003	0	0
ENSSSCT00000003129	ENSSSCG00000002828	LPCAT2	6:29997764-30056713	4668	0.88604	0.501142	0.702992	0.579631	0.433002	0.527346
ENSSSCT00000003130	ENSSSCG00000002829	MMP2	6:30058594-30087031	3733	5.67194	9.48587	7.9337	16.3374	16.2735	16.2545
ENSSSCT00000003131	ENSSSCG00000002830	IRX6	6:30198945-30205535	2975	0.0218935	0.0272574	0.0340985	0.0411663	0.0578029	0.0587768
ENSSSCT00000003132	ENSSSCG00000002831	IRX3	6:31046344-31051867	4667	2.22927	2.01832	2.14431	1.95393	1.86213	1.96561
ENSSSCT00000003136	ENSSSCG00000002835	TOX3	6:32494186-32608693	1964	0	0.041767	0.0127371	0	0.0292489	0.0127875
ENSSSCT00000003138	ENSSSCG00000040286	CYLD	6:34062708-34121238	3572	4.15256	4.84829	3.44234	3.54249	3.96791	3.63846
ENSSSCT00000003139	ENSSSCG00000002838	ZNF423	6:35119855-35299693	4453	0.156949	0.280105	0.216789	0.508454	0.44407	0.380535
ENSSSCT00000003142	ENSSSCG00000002841	N4BP1	6:36122034-36174504	3865	7.23399	9.48828	7.7169	5.60035	7.46895	6.61271
ENSSSCT00000003144	ENSSSCG00000023391	LONP2	6:36372597-36466175	2896	29.4189	46.9225	34.0353	38.2401	37.9761	37.7479
ENSSSCT00000003145	ENSSSCG00000002844	-	6:36994430-37193598	4092	8.39025	11.768	12.8969	7.88766	6.22476	7.40441
ENSSSCT00000003147	ENSSSCG00000002846	DNAJA2	6:37591568-37606403	3630	5.17584	6.98775	4.76389	6.51635	5.90849	6.00883
ENSSSCT00000003148	ENSSSCG00000002847	GPT2	6:37625194-37669628	4267	7.75834	5.94878	14.7851	4.56397	3.09183	3.86489
ENSSSCT00000003150	ENSSSCG00000002849	-	6:38029571-38062887	2271	6.02751e-06	3.95962e-06	0.00014752	0.187566	2.64109e-06	0.000219802
ENSSSCT00000003153	ENSSSCG00000002852	PLEKHF1	6:39786955-39797573	1895	15.3272	24.1285	17.1872	21.5628	22.5197	21.5803
ENSSSCT00000003155	ENSSSCG00000002854	POP4	6:39734548-39745984	2645	0.594588	1.3691	0.939418	1.89946	1.59511	1.67069
ENSSSCT00000003156	ENSSSCG00000002855	-	6:39919623-39933363	2776	0.909348	1.29599	0.909369	0.880907	1.10286	0.89582
ENSSSCT00000003158	ENSSSCG00000002857	-	6:42608306-42664722	3051	0.0767456	0.0521151	0.0238465	0.0377748	0.0821415	0.0638852
ENSSSCT00000003160	ENSSSCG00000002859	ANKRD27	6:42501169-42559492	4335	2.75188	3.07682	2.32498	3.48992	2.44493	2.95395
ENSSSCT00000003161	ENSSSCG00000002860	PDCD5	6:42483647-42491591	698	11.4353	16.1275	13.266	11.9755	12.5996	13.1739
ENSSSCT00000003164	ENSSSCG00000002863	LRP3	6:42988467-43003256	2171	0.124132	0.183152	0.0428541	0.133422	0.052169	0.114403
ENSSSCT00000003165	ENSSSCG00000002864	SLC7A10	6:43000013-43017636	4368	0.0644512	0.0894825	0.0218312	0.103784	0.0438814	0.0822759
ENSSSCT00000003166	ENSSSCG00000002865	GPATCH1	6:42895542-42934548	2709	1.23787	1.537	1.61415	1.73961	1.63569	1.90218
ENSSSCT00000003167	ENSSSCG00000002866	CEBPA	6:43084645-43085710	1065	2.61274	1.30701	1.63191	1.20873	1.19749	0.996518
ENSSSCT00000003168	ENSSSCG00000002867	CEBPG	6:43164938-43175006	3820	2.71649	2.46763	2.29901	2.45315	2.72766	2.38007
ENSSSCT00000003169	ENSSSCG00000002868	PEPD	6:43177064-43290369	1815	6.62398	8.8775	9.69442	10.5467	10.2057	10.659
ENSSSCT00000003170	ENSSSCG00000002869	LSM14A	6:43847881-43903614	3186	8.49843	11.517	7.50952	10.1155	9.31521	9.77661
ENSSSCT00000003173	ENSSSCG00000002872	KIAA0355	6:43940694-44030705	6458	0.000132279	1.8954	0.547902	0.122424	0.55704	0.283765
ENSSSCT00000003175	ENSSSCG00000002873	GPI	6:44032622-44069331	2104	19.8423	23.1341	18.4815	25.3358	22.0533	23.9598
ENSSSCT00000003177	ENSSSCG00000002875	-	6:44074126-44097065	1175	0.703827	0.793158	0.613444	1.29294	0.728965	0.979398
ENSSSCT00000003178	ENSSSCG00000002876	-	6:44103214-44119940	678	0.289241	8.55966e-09	3.47525e-09	7.43244e-25	2.11628e-06	1.76498e-14
ENSSSCT00000003179	ENSSSCG00000002877	-	6:44243313-44354235	1902	0.122875	0.30258	0.23951	0.318601	0.0361432	0.0677636
ENSSSCT00000003181	ENSSSCG00000002879	GRAMD1A	6:44576947-44593804	2082	6.86074	7.30703	5.7206	6.4458	7.19651	7.06554
ENSSSCT00000003182	ENSSSCG00000002880	-	6:44520831-44523776	2945	1.95623	3.22801	1.81543	2.53321	2.08439	2.32944
ENSSSCT00000003185	ENSSSCG00000002883	-	6:44942069-44950207	829	0	0.0753235	0.0345678	0	0	0
ENSSSCT00000003186	ENSSSCG00000002884	LSR	6:44759413-44773283	1794	3.91389	9.87376	6.61959	10.6886	9.59779	9.80397
ENSSSCT00000003187	ENSSSCG00000002885	USF2	6:44774561-44783590	1407	3.57294	4.80456	5.36453	5.65859	5.89206	5.56702
ENSSSCT00000003190	ENSSSCG00000002887	MAG	6:44794253-44809924	2392	0	0.112537	0.020603	0.117453	0.153716	0.134494
ENSSSCT00000003191	ENSSSCG00000002888	GAPDHS	6:44972130-44978847	978	0.0301065	0.184662	0.0846862	0.401289	0.129289	0.254489
ENSSSCT00000003195	ENSSSCG00000002891	FFAR3	6:44839666-44845134	1013	0	0	0	0	0.0309924	0.0271133
ENSSSCT00000003197	ENSSSCG00000002893	CD22	6:44822979-44835956	4118	1.9502e-34	2.1068e-47	2.52377e-10	3.13248e-23	3.46673e-14	4.94284e-19
ENSSSCT00000003198	ENSSSCG00000002893	CD22	6:44822979-44879703	2654	0.151041	1.37609	0.471586	1.41936	0.867608	1.06009
ENSSSCT00000003199	ENSSSCG00000002895	-	6:45146845-45160283	5711	0.807521	1.03239	1.18324	1.58127	2.32585	2.02749
ENSSSCT00000003200	ENSSSCG00000035162	-	6:45170297-45172215	645	0.773121	0.615772	0.691361	0.317018	1.09956	0.742626
ENSSSCT00000003202	ENSSSCG00000002898	-	6:45175646-45183952	3353	0.72578	0.55045	0.590049	0.80027	0.884137	0.961569
ENSSSCT00000003204	ENSSSCG00000002900	-	6:45184683-45195050	2206	2.25059e-05	6.7147e-06	0.0337095	0.00644406	1.23835e-06	1.3411e-06
ENSSSCT00000003206	ENSSSCG00000002901	UPK1A	6:45105117-45113631	774	0	0.0410515	0	0	0.0431021	0.0377043
ENSSSCT00000003207	ENSSSCG00000002902	ATP4A	6:44984232-44997552	3208	0.0889705	0.0494281	0.150773	0.12898	0.147158	0.151481
ENSSSCT00000003208	ENSSSCG00000002903	-	6:45005357-45006075	351	0	0.533428	0.247187	0.34666	0.977756	0.854841
ENSSSCT00000003209	ENSSSCG00000002904	HAUS5	6:45057546-45071611	4874	1.26872e-06	5.79863e-06	5.93453e-06	3.45374e-06	2.72375e-06	1.97728e-06
ENSSSCT00000003210	ENSSSCG00000002905	RBM42	6:45074526-45083228	1711	4.00446	7.93776	6.26042	8.8265	7.72628	8.74925
ENSSSCT00000003211	ENSSSCG00000002906	ETV2	6:45087298-45089576	981	1.07988	0.429297	0.703123	0.186582	0.225427	0.253556
ENSSSCT00000003212	ENSSSCG00000002907	-	6:45091932-45102669	632	5.12676	3.42983	3.50526	6.86924	4.24899	6.08324
ENSSSCT00000003213	ENSSSCG00000002908	ZBTB32	6:45141888-45145889	2176	0.0122262	0.024921	0	0.054188	0	0.0197666
ENSSSCT00000003215	ENSSSCG00000002910	ALKBH6	6:45384956-45390244	999	1.25827	2.19299	1.28811	2.27077	2.12824	2.28133
ENSSSCT00000003220	ENSSSCG00000002915	KIRREL2	6:45275942-45283443	2130	0.137627	0.0255053	0.0116754	0.0332729	0.0401963	0.0234463
ENSSSCT00000003221	ENSSSCG00000002916	APLP1	6:45285781-45295347	2099	0.000557212	2.41967e-05	0.0176217	0.162076	1.77543e-05	3.07345e-05
ENSSSCT00000003222	ENSSSCG00000002917	NFKBID	6:45296038-45304565	4121	0.0810575	0.230773	0.144353	0.291518	0.143005	0.250744
ENSSSCT00000003223	ENSSSCG00000002918	HCST	6:45307535-45309051	458	0.989178	0.850125	0.943178	0.516427	0.356644	0.545802
ENSSSCT00000003224	ENSSSCG00000002919	TYROBP	6:45309200-45312539	559	7.91935	11.0837	8.39302	13.0903	10.2353	11.975
ENSSSCT00000003226	ENSSSCG00000002921	CLIP3	6:45390658-45405687	3355	0.0807486	0.0381684	0.120786	0.267994	0.212547	0.240152
ENSSSCT00000003228	ENSSSCG00000002923	WDR62	6:45418860-45473977	5262	0.376955	0.555914	0.481545	0.911542	0.832342	0.927325
ENSSSCT00000003232	ENSSSCG00000002926	TBCB	6:45482535-45492627	975	10.576	13.1285	10.3417	10.0155	10.6733	10.0184
ENSSSCT00000003233	ENSSSCG00000002927	LRFN3	6:45346636-45351832	1872	0	0.0440333	0	0.0893517	0.0154207	0.0269841
ENSSSCT00000003235	ENSSSCG00000002929	SYNE4	6:45380247-45383267	912	1.30094e-33	0.0643167	3.58661e-10	0.00985296	0.0760512	0.0944219
ENSSSCT00000003237	ENSSSCG00000002930	ZNF260	6:45859483-45880311	3659	0.879383	1.17775	0.957607	1.48007	1.59654	1.34697
ENSSSCT00000003238	ENSSSCG00000002931	ZNF565	6:45544146-45577294	2007	6.04476e-07	0.259564	0.588133	0.385479	1.3046e-101	0.387694
ENSSSCT00000003239	ENSSSCG00000026961	-	6:46823972-46842870	1514	0.509554	0.685546	0.340169	0.742633	0.916688	0.868009
ENSSSCT00000003240	ENSSSCG00000036748	-	3:46071785-46080689	1203	0.181091	4.15408e-06	0.0680283	9.03617e-08	3.95658e-06	7.33808e-07
ENSSSCT00000003241	ENSSSCG00000025590	ZNF571	6:46541978-46550035	2090	1.75614e-05	0.00117171	1.21505e-05	0.00933732	3.3803e-05	1.99304e-05
ENSSSCT00000003242	ENSSSCG00000029170	ZNF566	6:45894253-45927769	2038	0.402047	0.521744	0.317856	0.686457	0.574944	0.614873
ENSSSCT00000003245	ENSSSCG00000002932	ZNF567	6:45709661-45737832	3477	0.82501	1.1354	0.741111	0.961271	0.540862	0.709858
ENSSSCT00000003246	ENSSSCG00000002933	ZNF382	6:45777392-45786795	1614	0.424152	0.119892	0.0003572	0.13957	0.00567713	7.45153e-05
ENSSSCT00000003248	ENSSSCG00000002935	ZNF568	6:46094409-46121776	2578	0.262651	0.351337	0.151636	3.25623e-05	0.16634	0.0289316
ENSSSCT00000003249	ENSSSCG00000021946	ZNF383	6:46121996-46134099	1275	0.21716	0.0643027	0.117009	0.298837	0.00783843	0.110038
ENSSSCT00000003253	ENSSSCG00000030256	ZNF790	6:46642039-46643808	1488	0.0185547	0.113588	0.034686	0.148154	0.0994378	0.121798
ENSSSCT00000003256	ENSSSCG00000025590	ZNF571	6:46541827-46555683	2283	0.42491	0.353905	0.779874	0.436634	0.509685	0.412143
ENSSSCT00000003257	ENSSSCG00000029420	ZNF569	6:46377295-46425611	2127	0.563877	0.906821	0.584661	0.966387	0.71122	0.727944
ENSSSCT00000003258	ENSSSCG00000029875	ZNF461	6:45752919-45832009	1865	0.26515	0.343623	0.202248	0.100226	0.184171	0.224334
ENSSSCT00000003259	ENSSSCG00000025590	ZNF571	6:46541978-46548579	1956	0.115287	3.0801e-10	1.8392e-06	0.130742	5.73626e-10	0.129998
ENSSSCT00000003260	ENSSSCG00000002938	ZNF585B	6:46209121-46229060	3430	0.474977	0.537477	0.463715	0.861558	0.572846	0.69183
ENSSSCT00000003272	ENSSSCG00000002950	SIPA1L3	6:47036379-47137473	5259	0.00285473	1.01788	0.00264491	1.7585	0.929354	1.84245
ENSSSCT00000003274	ENSSSCG00000002952	YIF1B	6:47224560-47238898	1019	1.03217	1.93776	1.61236	2.33393	1.73464	2.01799
ENSSSCT00000003275	ENSSSCG00000002953	-	6:47223437-47224226	407	9.73796	25.7961	26.3034	15.8667	17.7766	16.1094
ENSSSCT00000003277	ENSSSCG00000002954	SPINT2	6:47172646-47210040	663	67.1664	130.943	117.875	122.573	98.0028	109.607
ENSSSCT00000003278	ENSSSCG00000002955	CATSPERG	6:47253307-47282607	3417	0.0417171	0.158024	0.0687916	0.068842	8.87022e-06	0.093873
ENSSSCT00000003280	ENSSSCG00000002957	GGN	6:47297574-47301539	2314	0.0172496	1.4428e-06	0.0383125	0.0877265	6.52641e-09	0.0415132
ENSSSCT00000003282	ENSSSCG00000002959	FAM98C	6:47315416-47319485	1290	3.09596	4.25111	4.12012	3.27043	3.48354	3.29314
ENSSSCT00000003283	ENSSSCG00000002960	RASGRP4	6:47320706-47333240	2153	0.11097	1.59068e-15	6.31164e-06	0.143475	1.32261e-06	0.0681228
ENSSSCT00000003286	ENSSSCG00000002962	MAP4K1	6:47458632-47474972	2355	4.15383e-05	0.29463	0.246502	0.349669	0.337066	0.356697
ENSSSCT00000003287	ENSSSCG00000002963	EIF3K	6:47476284-47487906	771	38.6603	42.6568	41.2998	33.4691	36.2931	35.2994
ENSSSCT00000003289	ENSSSCG00000002965	ACTN4	6:47493956-47565993	3928	6.18945	17.4768	10.9152	17.8222	17.2604	17.7652
ENSSSCT00000003297	ENSSSCG00000002972	-	6:47717679-47728296	1566	0.50826	0.876066	0.769724	1.21266	1.69042	1.4461
ENSSSCT00000003309	ENSSSCG00000002980	-	14:132240915-132247816	465	0	0	0.0765566	0	0	0
ENSSSCT00000003319	ENSSSCG00000002988	ZNF546	6:48418815-48430098	3548	0.233927	0.107996	0.101055	0.121238	9.6399e-05	0.0553043
ENSSSCT00000003320	ENSSSCG00000002989	AKT2	6:48559823-48588760	3344	0.239322	0.227099	0.000303774	0.239127	0.395207	0.313675
ENSSSCT00000003321	ENSSSCG00000002990	CNTD2	6:48550615-48553929	861	0	0	0	0	0.113205	0.0330105
ENSSSCT00000003322	ENSSSCG00000002991	TTC9B	6:48543541-48547509	2603	0.322889	0.400943	0.39521	0.706391	0.61572	0.708852
ENSSSCT00000003325	ENSSSCG00000002993	CYP2A19	6:49056670-49064085	1467	0	0.0438463	0	0.106483	0.112246	0.109803
ENSSSCT00000003326	ENSSSCG00000002994	CYP2F1	6:49016325-49031204	2568	0.0102369	0.0834415	0.0477342	0.0635022	0.0876742	0.067122
ENSSSCT00000003327	ENSSSCG00000002995	-	6:49002300-49009453	1140	5.25275	6.74795	5.15938	7.03849	6.71632	6.88176
ENSSSCT00000003328	ENSSSCG00000002996	-	6:48989554-48999608	1424	0.625313	0.983401	0.00021176	0.285298	0.250317	0.222117
ENSSSCT00000003329	ENSSSCG00000002997	-	6:48986931-48988366	393	0.210588	2.41968e-05	0.302368	0.661793	0	0.0998907
ENSSSCT00000003330	ENSSSCG00000002998	SNRPA	6:48971867-48982369	848	1.61035	3.00261	2.15075	3.94615	3.99884	4.06998
ENSSSCT00000003332	ENSSSCG00000003000	ITPKC	6:48942973-48961783	4035	0.598081	1.58076	0.806137	1.24542	1.1301	1.14368
ENSSSCT00000003339	ENSSSCG00000003006	CYP2B22	6:49110788-49178413	2899	0	0.295595	0.00419527	0.317161	0.122338	0.390874
ENSSSCT00000003340	ENSSSCG00000028794	-	6:49382202-49398742	1809	6.51324	8.30368	7.3287	6.22863	8.25761	6.88598
ENSSSCT00000003344	ENSSSCG00000003011	-	6:50104510-50134816	1221	0.162532	0.0995761	0.15211	0.223305	0.632084	0.478526
ENSSSCT00000003345	ENSSSCG00000003012	-	6:49481905-49485896	504	1.50643e-06	5.57716e-06	0.222023	0.319229	1.21071e-06	0.202352
ENSSSCT00000003346	ENSSSCG00000003013	B9D2	6:49349709-49358404	1035	0.985176	1.52456	1.18702	1.90041	0.755277	1.48008
ENSSSCT00000003347	ENSSSCG00000028794	-	6:49367760-49371126	519	0.210071	0.242165	1.10561	0.597363	0.160576	0.144361
ENSSSCT00000003348	ENSSSCG00000003015	EXOSC5	6:49373371-49377133	1535	0.824685	0.906914	1.09496	1.28731	1.01774	1.11378
ENSSSCT00000003349	ENSSSCG00000003016	CCDC97	6:49318628-49328876	3973	0.185818	0.385134	0.315124	0.491741	0.662223	0.588308
ENSSSCT00000003352	ENSSSCG00000003018	LIPE	6:49549302-49560135	2865	0.122571	0.237386	0.0437348	0.0415595	0.100783	0.0441352
ENSSSCT00000003355	ENSSSCG00000003021	MEGF8	6:49577410-49618688	8867	1.14417	1.15857	1.39967	2.13364	2.20191	2.14399
ENSSSCT00000003356	ENSSSCG00000003022	TMEM145	6:49619547-49628070	2574	0.262192	0.191075	0.081115	0.0846898	0.114479	0.181708
ENSSSCT00000003358	ENSSSCG00000003024	PRR19	6:49630832-49632808	1189	1.72382	3.44796	2.51836	4.36189	3.78211	4.00339
ENSSSCT00000003359	ENSSSCG00000029070	PAFAH1B3	6:49635624-49638171	974	13.0343	10.8805	14.4945	10.7329	9.00433	10.1367
ENSSSCT00000003361	ENSSSCG00000003030	CIC	6:49638990-49651615	6110	0.201654	0.548734	0.755952	1.26309	1.11786	1.27382
ENSSSCT00000003369	ENSSSCG00000003022	TMEM145	6:49619546-49628239	2448	0.0789023	0.0947933	0.155577	0.11115	0.156042	2.87385e-05
ENSSSCT00000003371	ENSSSCG00000003035	-	6:49690392-49701580	1449	4.00154	3.93868	3.98878	4.98664	4.72266	4.54725
ENSSSCT00000003373	ENSSSCG00000003037	ZNF574	6:49834903-49837595	2658	0.819063	1.32712	0.947819	1.56528	1.97548	1.70073
ENSSSCT00000003374	ENSSSCG00000003038	GRIK5	6:49849237-49901079	2943	0.0974388	0.162419	0.115611	0.117726	0.180145	0.132733
ENSSSCT00000003376	ENSSSCG00000015131	GRIK4	9:47829632-48095342	2448	0.176865	0.0386335	0.0969762	2.12858e-05	0.00883617	0.261881
ENSSSCT00000003377	ENSSSCG00000003040	ARHGEF1	6:49975960-49993539	3534	0.267868	0.475087	0.349895	0.699479	0.539484	0.591957
ENSSSCT00000003379	ENSSSCG00000003042	RPS19	6:50001040-50010060	2669	28.7237	29.5628	27.7529	28.3446	28.2047	28.1854
ENSSSCT00000003381	ENSSSCG00000003044	LYPD4	6:50010557-50023571	942	0.188942	0.321991	0.531674	0.391827	0.202888	0.3254
ENSSSCT00000003382	ENSSSCG00000003045	-	6:49895082-49927020	3045	0	0	0	0	9.73538e-09	3.57007e-09
ENSSSCT00000003383	ENSSSCG00000003046	RABAC1	6:49933587-49936595	935	32.5688	35.1878	39.7316	26.8573	32.7903	30.2975
ENSSSCT00000003384	ENSSSCG00000038419	-	6:50110506-50139104	2400	6.65202e-07	1.73441e-05	5.6927e-05	0.11591	0.170101	0.158355
ENSSSCT00000003385	ENSSSCG00000037422	-	6:50167771-50177591	348	0.130338	1.01637	0.0628105	1.74166	1.41932	1.67519
ENSSSCT00000003388	ENSSSCG00000003051	-	6:50246563-50255713	1317	0.0212942	0	0	0.0188992	0.0228328	0.0199761
ENSSSCT00000003391	ENSSSCG00000003054	ZNF575	6:50397305-50398505	726	0	0.133591	0	0.0386578	0.0467055	0
ENSSSCT00000003392	ENSSSCG00000003055	XRCC1	6:50403692-50419297	2462	1.02	0.989231	1.32156	1.30321	0.912023	1.26791
ENSSSCT00000003396	ENSSSCG00000003059	ZNF428	6:50451146-50459786	925	1.99573	2.17255	2.21959	3.43336	2.90375	3.08459
ENSSSCT00000003398	ENSSSCG00000003061	CADM4	6:50461379-50478437	3247	2.85103	5.04298	2.89542	4.47844	4.36747	4.66644
ENSSSCT00000003399	ENSSSCG00000003062	LYPD3	6:50341158-50345734	2186	0.0729955	0	0.0340553	0.0862725	0.052112	0.0797912
ENSSSCT00000003400	ENSSSCG00000003063	PHLDB3	6:50350149-50376370	2511	0.492271	0.776116	0.471945	1.19416	1.19495	1.31511
ENSSSCT00000003401	ENSSSCG00000003064	ETHE1	6:50375979-50394382	741	3.89737	4.24584	4.46357	5.73144	3.78148	4.34407
ENSSSCT00000003403	ENSSSCG00000003066	IRGC	6:50542123-50543636	1513	0	0.0185808	0.0170212	0.0484708	0.0195195	0.0341553
ENSSSCT00000003405	ENSSSCG00000003068	SMG9	6:50539349-50569804	1928	3.2331e-06	0.117787	0.226034	1.04694e-05	3.14273e-05	2.51954e-05
ENSSSCT00000003406	ENSSSCG00000003069	KCNN4	6:50579640-50593834	2651	1.27658	0.362961	1.2827	0.412153	0.180094	0.287342
ENSSSCT00000003407	ENSSSCG00000003070	-	6:50736927-50758262	2461	0.727935	0.767339	0.606312	0.89039	1.14316	0.913918
ENSSSCT00000003408	ENSSSCG00000003071	ZNF404	6:50698320-50721479	2364	0.234862	0.205144	0.187788	0.247806	0.191596	0.209545
ENSSSCT00000003409	ENSSSCG00000003072	ZNF283	6:50650504-50678027	3022	1.80026	2.13207	1.64605	2.22842	2.00061	1.95212
ENSSSCT00000003410	ENSSSCG00000003073	LYPD5	6:50607022-50612462	1986	0.0269952	0.0412798	0.0125989	0.0478666	0.0433703	0.0632436
ENSSSCT00000003413	ENSSSCG00000038289	-	6:50777726-50785751	1707	0.0631299	0.425556	0.22345	0.419646	0.139954	0.329251
ENSSSCT00000003414	ENSSSCG00000003077	ZNF112	6:50915620-50937422	2019	0.0285702	2.35818e-08	0.0311909	2.34501e-14	5.61981e-06	1.03509e-05
ENSSSCT00000003415	ENSSSCG00000003078	CEACAM19	6:51182431-51203807	1862	0.50681	3.42529	0.540789	5.90623	4.17258	5.48285
ENSSSCT00000003416	ENSSSCG00000003079	-	6:51161183-51180731	6890	0.0265126	0.154899	0.0493895	0.205594	0.0359902	0.0627976
ENSSSCT00000003418	ENSSSCG00000003080	-	6:51133101-51150573	971	0	0.0310435	0.0284741	0.161905	0.130408	0.0570424
ENSSSCT00000003419	ENSSSCG00000003081	CEACAM16	6:51220878-51228654	1320	0.0404287	0.0414326	0	0.0547395	0.0660661	0.0178041
ENSSSCT00000003421	ENSSSCG00000003083	CBLC	6:51276505-51292547	1695	1.25082	2.3579	1.64956	1.65627	1.24791	1.46468
ENSSSCT00000003423	ENSSSCG00000003085	CLPTM1	6:51413601-51441229	1890	0.441203	8.04916e-05	0.26545	0.000101657	0.000247656	0.000344128
ENSSSCT00000003424	ENSSSCG00000003086	APOC2	6:51404279-51406445	636	0	0.106053	0	0	0	0
ENSSSCT00000003426	ENSSSCG00000003088	APOE	6:51372240-51375617	1450	21.9468	15.5337	15.624	17.8455	10.5648	13.5423
ENSSSCT00000003427	ENSSSCG00000003089	TOMM40	6:51360162-51369398	963	1.26687e-06	0.051953	6.90327e-07	0.100355	1.30908e-06	0.0899402
ENSSSCT00000003428	ENSSSCG00000003090	NECTIN2	6:51317419-51358657	3070	4.83481	14.703	6.83108	16.9974	14.838	15.9384
ENSSSCT00000003429	ENSSSCG00000003090	NECTIN2	6:51317448-51348350	1952	2.42466	3.46482	1.66207	5.69905	3.01335	3.66034
ENSSSCT00000003430	ENSSSCG00000003091	IRF2BP1	6:52197110-52198865	1755	4.52713	5.40446	4.37223	5.34384	5.29714	5.19942
ENSSSCT00000003431	ENSSSCG00000003092	FOXA3	6:52180435-52190517	4341	0.0648673	0.0480324	0.0494378	0.0731184	0.0757114	0.066246
ENSSSCT00000003432	ENSSSCG00000003093	SYMPK	6:52139539-52180293	3929	2.08018	2.8775	2.64498	4.77425	4.6126	4.69734
ENSSSCT00000003437	ENSSSCG00000003098	PPP5C	6:52377978-52402047	2757	3.63552	4.09052	3.23047	5.42508	5.02969	5.23647
ENSSSCT00000003439	ENSSSCG00000003100	CCDC61	6:52294534-52318003	1981	1.02257	2.26281	1.62504	2.15458	1.44668	1.86771
ENSSSCT00000003440	ENSSSCG00000003101	HIF3A	6:52345101-52373058	2019	0.954585	3.10852	2.42541	5.20701	3.47895	4.28625
ENSSSCT00000003441	ENSSSCG00000003102	PNMA8A	6:52429284-52431115	1284	0	0.0671288	0.0410121	0.0778205	0.141027	0.123382
ENSSSCT00000003442	ENSSSCG00000003103	FKRP	6:52629045-52637396	2027	0.188246	0.252293	0.204671	0.330489	0.0234555	0.34402
ENSSSCT00000003443	ENSSSCG00000003104	STRN4	6:52601937-52627905	3325	6.52194	8.2059	7.1513	8.28384	8.7498	8.58502
ENSSSCT00000003444	ENSSSCG00000003105	SLC1A5	6:52647437-52661464	2851	16.9016	13.7928	19.362	13.4903	14.9341	14.3194
ENSSSCT00000003446	ENSSSCG00000003107	ARHGAP35	6:52711897-52841280	9022	4.20931	5.41607	3.57599	7.41108	5.79185	6.63697
ENSSSCT00000003447	ENSSSCG00000003108	NPAS1	6:52857753-52874626	1779	0.304442	0.108657	0.085291	0	0.0489235	0.0285362
ENSSSCT00000003448	ENSSSCG00000003109	TMEM160	6:52874823-52877190	685	1.78111	1.39344	1.85426	1.58634	1.56368	1.45604
ENSSSCT00000003449	ENSSSCG00000003110	ZC3H4	6:52897810-52936960	3498	1.04878	1.51938	1.47288	2.04129	2.13402	1.9087
ENSSSCT00000003450	ENSSSCG00000003111	SAE1	6:52957468-53027134	2082	4.20032	5.35389	4.39999	5.2627	4.83107	5.05855
ENSSSCT00000003452	ENSSSCG00000003112	-	6:53038087-53042777	582	0.466239	0.419017	0.715866	0.311929	0.628211	0.549468
ENSSSCT00000003453	ENSSSCG00000003113	C5AR2	6:53124495-53125509	1014	0.115356	0.383176	0.0810933	0.358707	0.216692	0.270815
ENSSSCT00000003454	ENSSSCG00000003114	DHX34	6:53131254-53161346	4821	1.40698	1.62018	1.47226	2.17877	2.37992	2.40653
ENSSSCT00000003455	ENSSSCG00000003115	MEIS3	6:53178919-53188339	1104	0.430535	0.719717	0.391023	1.03122	0.727932	0.636836
ENSSSCT00000003459	ENSSSCG00000003119	ZNF541	6:53280559-53306736	4017	3.30448e-08	2.09507e-06	0	1.65489e-06	0	0.0116909
ENSSSCT00000003460	ENSSSCG00000003119	ZNF541	6:53280047-53301274	4229	0.0181779	0.0308452	0.00564449	0.04549	0.00648305	2.84295e-07
ENSSSCT00000003461	ENSSSCG00000003120	NAPA	6:53249329-53275306	1711	4.56013	6.17383	6.3963	8.44076	8.10336	8.04304
ENSSSCT00000003462	ENSSSCG00000003121	KPTN	6:53238656-53245526	1416	0.216514	0.538535	1.13639	0.585964	9.73087e-06	0.204011
ENSSSCT00000003469	ENSSSCG00000003128	LIG1	6:53620640-53651685	2649	0.950774	1.21084	1.16367	1.34716	1.31468	1.25697
ENSSSCT00000003470	ENSSSCG00000003129	ZSWIM9	6:53661293-53678302	1995	0.053724	0.0958377	0.0501475	0.0347444	5.26481e-07	0.0360654
ENSSSCT00000003472	ENSSSCG00000003131	SYNGR4	6:53785653-53793666	705	0.045155	0	0.0850251	0	0	0
ENSSSCT00000003473	ENSSSCG00000003132	KDELR1	6:53794971-53803580	2020	5.73835	5.16767	5.59769	4.98871	5.70865	4.95595
ENSSSCT00000003474	ENSSSCG00000003133	GRIN2D	6:53809599-53847788	3996	0.00642723	0.0196334	0.00598783	0.0113855	0	0.00601728
ENSSSCT00000003475	ENSSSCG00000003134	GRWD1	6:53849667-53859187	5138	0.950997	1.78998	1.41147	1.92992	2.02939	2.11877
ENSSSCT00000003476	ENSSSCG00000003135	KCNJ14	6:53862392-53866763	2674	0.333385	0.439556	0.32002	0.217223	0.335896	0.257158
ENSSSCT00000003477	ENSSSCG00000003136	-	6:53869934-53878853	1452	7.68857	9.15668	7.31851	7.6229	8.50857	8.53782
ENSSSCT00000003478	ENSSSCG00000003137	PLEKHA4	6:54144019-54170638	3031	0.61824	0.997092	0.864465	1.4911	0.707665	1.15795
ENSSSCT00000003479	ENSSSCG00000003138	HSD17B14	6:54125406-54143532	783	2.9239	8.01022	5.01427	9.03505	5.30963	7.09713
ENSSSCT00000003480	ENSSSCG00000003139	BCAT2	6:54107683-54123412	2554	0.116429	0.116323	0.11439	4.61181e-05	2.30453e-05	1.25314e-05
ENSSSCT00000003482	ENSSSCG00000003140	FGF21	6:54082605-54084606	907	0	0.0337137	0	0	0	0
ENSSSCT00000003484	ENSSSCG00000003142	IZUMO1	6:54072706-54076275	993	0.0295651	0	0	0.0525391	0.0952158	0.055532
ENSSSCT00000003486	ENSSSCG00000003143	MAMSTR	6:54052714-54057880	1424	0.0584799	0.0795685	0.1458	0.121076	0.0835855	0.127975
ENSSSCT00000003487	ENSSSCG00000003144	BAX	6:54210653-54228144	1648	1.04562	1.57621	0.98537	2.3767	1.81508	2.23542
ENSSSCT00000003489	ENSSSCG00000003145	FUT2	6:54034334-54044730	2486	0.243744	4.79987	0.143321	8.35875	6.77924	7.27168
ENSSSCT00000003491	ENSSSCG00000003146	NTN5	6:54006886-54013639	1500	0.14711	0.168853	0.0859352	0.212081	0.315347	0.241411
ENSSSCT00000003492	ENSSSCG00000003147	CA11	6:53993392-54024826	1577	0.290193	0.807106	0.237749	0.502491	0.397112	0.508036
ENSSSCT00000003493	ENSSSCG00000003147	CA11	6:53989891-53998621	4589	0.125045	0.123551	0.169459	0.0424583	0.0755971	0.0509651
ENSSSCT00000003494	ENSSSCG00000003148	DBP	6:53986957-53993020	1911	0.687479	0.440609	0.639749	0.384387	0.301392	0.435995
ENSSSCT00000003495	ENSSSCG00000003149	TULP2	6:54177226-54185598	1461	0	5.7977e-11	1.2018e-21	0	0	0
ENSSSCT00000003496	ENSSSCG00000003150	NUCB1	6:54188443-54209451	2188	10.1718	16.318	14.1662	20.445	16.3507	18.6845
ENSSSCT00000003499	ENSSSCG00000003152	RUVBL2	6:54250530-54263561	1766	1.10223	2.28769	2.25495	2.71356	2.86242	3.33119
ENSSSCT00000003500	ENSSSCG00000003153	FTL	6:54231120-54232753	933	347.761	428.986	444.58	444.14	430.816	438.942
ENSSSCT00000003502	ENSSSCG00000003154	GYS1	6:54233052-54250260	4807	5.31907e-215	5.62091e-212	8.55817e-225	0.0102168	1.01177e-201	0.005356
ENSSSCT00000003504	ENSSSCG00000003155	PPP1R15A	6:54172049-54175463	2307	1.62031	5.05094	2.02243	3.42563	3.34719	3.31342
ENSSSCT00000003506	ENSSSCG00000003156	HRC	6:54337487-54366064	2204	0.072353	0.184354	0.202528	0.128268	0.361568	0.282457
ENSSSCT00000003507	ENSSSCG00000003157	LIN7B	6:54309535-54313138	757	0.468034	0.686005	0.961617	0.230068	0.2165	0.220514
ENSSSCT00000003508	ENSSSCG00000003158	DHDH	6:54210608-54217287	1129	7.58728	5.67328	6.88992	3.04534	4.26916	3.58123
ENSSSCT00000003509	ENSSSCG00000003159	KCNA7	6:54278886-54286334	1434	0	0	4.05465e-05	3.83265e-05	4.88979e-05	4.07626e-05
ENSSSCT00000003510	ENSSSCG00000003160	NTF4	6:54271245-54274092	1189	0.502742	0.904576	0.873966	1.0415	0.821742	0.87618
ENSSSCT00000003511	ENSSSCG00000003161	PRRG2	6:54637562-54643738	573	4.46596	3.08925	4.08049	2.01883	2.7605	2.52677
ENSSSCT00000003515	ENSSSCG00000003165	-	6:54577413-54580846	1856	214.121	183.917	206.338	154.318	181.489	166.825
ENSSSCT00000003516	ENSSSCG00000003166	-	3:110594399-110594999	471	0	0	0	0.141341	0.0854068	0.0746905
ENSSSCT00000003517	ENSSSCG00000003167	FLT3LG	6:54552623-54563806	1191	0.966778	1.28511	1.34739	1.87155	1.59473	1.59369
ENSSSCT00000003518	ENSSSCG00000003168	ALDH16A1	6:54528847-54546818	3603	1.49474	1.76042	1.63122	1.36522	1.68126	1.45361
ENSSSCT00000003519	ENSSSCG00000003169	PIH1D1	6:54524171-54537588	1516	3.09899	3.64746	3.8479	2.9272	3.50803	3.48074
ENSSSCT00000003520	ENSSSCG00000003170	SLC17A7	6:54511125-54521616	2971	0.0438494	0.0357332	0.0408774	0.0621612	0.0281604	0.0492786
ENSSSCT00000003522	ENSSSCG00000003172	CCDC155	6:54479769-54500887	1542	0.0178303	0.0545701	0.0999759	0.0316347	0.0382183	0.0334375
ENSSSCT00000003528	ENSSSCG00000003177	BCL2L12	6:54707236-54714066	971	0.455481	0.45333	0.882687	1.49769	0.914601	0.713511
ENSSSCT00000003530	ENSSSCG00000003178	IRF3	6:54701732-54706079	1259	4.19547	5.55582	4.74367	5.87929	4.68641	6.19726
ENSSSCT00000003535	ENSSSCG00000003183	RRAS	6:54680596-54684719	950	5.57978	10.3265	5.49641	8.42184	7.36367	7.93527
ENSSSCT00000003540	ENSSSCG00000003187	FCGRT	6:54589861-54599190	1627	4.88566	1.26196	2.95179	9.02047	7.60787	5.00791
ENSSSCT00000003541	ENSSSCG00000003187	FCGRT	6:54589581-54599190	1480	0.000678232	0.00164958	1.20357	1.21507	0.764541	1.32266
ENSSSCT00000003542	ENSSSCG00000003187	FCGRT	6:54581132-54599190	1610	7.58101	22.2755	16.3785	14.1131	14.1021	16.9672
ENSSSCT00000003544	ENSSSCG00000003189	PRMT1	6:54718842-54730597	1633	4.03979	6.86681	3.50052	9.68675	8.20642	8.73429
ENSSSCT00000003546	ENSSSCG00000003191	TSKS	6:54762191-54779753	1758	0	0.0157268	0.0576105	0.0273528	0.0660898	0.0433675
ENSSSCT00000003547	ENSSSCG00000003192	IL4I1	6:54906405-54945840	2111	3.54953e-135	0.0153853	0.024533	0.0248679	2.60149e-20	2.54788e-39
ENSSSCT00000003548	ENSSSCG00000003193	TBC1D17	6:54889948-54906605	3516	2.17016	3.31513	2.68695	3.42792	3.28834	3.23994
ENSSSCT00000003549	ENSSSCG00000003194	AKT1S1	6:54881587-54889952	1743	2.35077	3.42924	3.06785	4.21088	4.35328	4.1736
ENSSSCT00000003550	ENSSSCG00000003195	PNKP	6:54867636-54880807	6696	2.771	3.84743	3.47532	4.70313	4.79377	4.70825
ENSSSCT00000003551	ENSSSCG00000003196	PTOV1	6:54865791-54873312	1248	0.810867	2.57469	0.971101	2.70775	0.000143498	0.691614
ENSSSCT00000003552	ENSSSCG00000003197	MED25	6:54834338-54852820	3129	0.390258	0.98952	0.897795	1.36828	1.09308	1.31409
ENSSSCT00000003553	ENSSSCG00000003198	FUZ	6:54820541-54829923	5289	0.355702	0.55787	0.456624	0.517147	0.483304	0.471469
ENSSSCT00000003554	ENSSSCG00000003199	AP2A1	6:54786698-54823541	2934	2.98729	3.93027	4.62482	4.44574	7.24503	5.59803
ENSSSCT00000003556	ENSSSCG00000003201	ATF5	6:54945128-54950141	1775	0.439877	0.881414	0.328827	1.27285	0.772698	0.935252
ENSSSCT00000003559	ENSSSCG00000003204	VRK3	6:54973730-55011330	2879	0.123166	0.360448	0.115333	0.0817862	0.344719	0.0583763
ENSSSCT00000003562	ENSSSCG00000003207	IZUMO2	6:55059770-55069392	627	0	0.10811	0.0496974	0.0469551	0	0
ENSSSCT00000003566	ENSSSCG00000003211	NR1H2	6:55238578-55245451	1853	6.39832	7.19336	7.25606	7.47568	7.46871	7.31167
ENSSSCT00000003567	ENSSSCG00000003212	NAPSA	6:55218450-55227256	4123	0.0828181	0.0280323	0.0645488	0.0881209	0.0665655	0.0698921
ENSSSCT00000003569	ENSSSCG00000003214	KCNC3	6:55201015-55216875	5992	0.0118161	0.048589	0.0614769	0.0859919	1.81105e-05	0.0295293
ENSSSCT00000003572	ENSSSCG00000003216	POLD1	6:55247855-55272083	3301	0.600541	0.97143	0.872562	0.969477	0.696645	0.833824
ENSSSCT00000003573	ENSSSCG00000003217	JOSD2	6:55336555-55342538	772	4.59591	3.8897	4.55846	4.66169	4.78346	4.91242
ENSSSCT00000003574	ENSSSCG00000003218	MYBPC2	6:55282445-55310295	3756	0	0.0558448	0.0442309	0.0770257	0.0293377	0.00232574
ENSSSCT00000003575	ENSSSCG00000003218	MYBPC2	6:55281802-55310295	4107	0.00624653	7.17744e-06	0.0644535	0.062609	7.03929e-06	0.0622088
ENSSSCT00000003577	ENSSSCG00000003219	FAM71E1	6:55310728-55316171	645	0.558005	0.416294	0.334823	0.0452045	0.163865	0.143333
ENSSSCT00000003581	ENSSSCG00000003222	SYT3	6:55416001-55433288	3951	0.104056	0.0794664	0.0727081	0.16129	0.104381	0.140041
ENSSSCT00000003584	ENSSSCG00000003225	-	6:55748708-55759778	2112	1.23227e-24	0.00564225	0.0167695	3.48409e-08	0.0152138	3.41957e-10
ENSSSCT00000003585	ENSSSCG00000037466	-	6:55781904-55824239	2409	0.202764	0.335057	0.245362	0.429023	0.340311	0.325135
ENSSSCT00000003587	ENSSSCG00000003228	VSIG10L	6:58518923-58532304	2577	0.152982	0.0727392	0.0665785	0.135569	0.120103	0.114637
ENSSSCT00000003588	ENSSSCG00000003229	ETFB	6:58501810-58517647	1008	12.2561	14.1594	11.5428	11.302	13.1561	11.8913
ENSSSCT00000003590	ENSSSCG00000003231	NKG7	6:58496088-58497827	1186	0.55223	0.711071	1.05634	0.916649	0.978679	0.991408
ENSSSCT00000003592	ENSSSCG00000003233	ZNF175	6:58408876-58417422	2049	0.587146	0.492112	0.52363	0.971636	0.838442	0.965885
ENSSSCT00000003593	ENSSSCG00000003234	-	6:58401167-58411624	1002	0.138422	0.133031	0.414227	0.0603925	0.121124	0.192275
ENSSSCT00000003594	ENSSSCG00000003235	-	6:58392612-58396490	999	0.0782773	0.0450058	0.0137588	0.065203	0.0472665	0.0551339
ENSSSCT00000003595	ENSSSCG00000003236	-	6:58365181-58384934	2008	0.360168	0.480722	0.299175	0.333418	0.351377	0.355633
ENSSSCT00000003597	ENSSSCG00000003238	SPACA6	6:58321913-58331374	975	0.21152	0.185344	0.0283334	0.268513	0.227091	0.34057
ENSSSCT00000003598	ENSSSCG00000003239	HAS1	6:58307113-58313486	2096	0.11458	0.207631	0.11881	0.417581	0.327225	0.357877
ENSSSCT00000003599	ENSSSCG00000003240	-	6:58273002-58283799	3297	0.510825	0.664339	0.534681	1.10001	0.689668	0.971388
ENSSSCT00000003600	ENSSSCG00000003241	ZNF614	6:58102158-58134682	2270	0.464485	0.464784	0.406885	0.490954	0.638483	0.553719
ENSSSCT00000003603	ENSSSCG00000003243	-	6:58139200-58152151	2349	0.124206	3.66873e-17	0.310115	3.4084e-09	0.331697	0.0612063
ENSSSCT00000003604	ENSSSCG00000032969	-	6:58189409-58201869	3210	0.13512	0.629141	0.205392	0.412937	0.603881	0.255905
ENSSSCT00000003608	ENSSSCG00000003248	-	6:56297327-56302622	1839	0.0502331	0.0723394	0.144593	0.153586	0.0779224	0.0894241
ENSSSCT00000003610	ENSSSCG00000032690	-	6:56585055-56589724	1194	0	0	0	0.0211521	0	0.0223573
ENSSSCT00000003611	ENSSSCG00000003251	NLRP12	6:56402632-56425405	4459	0.00573279	0.0467107	0.00533979	1.40649e-07	0.0306774	0.0268423
ENSSSCT00000003612	ENSSSCG00000032113	-	6:56368881-56381217	2371	0.302145	0.690408	0.518588	1.00034	0.420557	0.72367
ENSSSCT00000003613	ENSSSCG00000003253	-	6:56236317-56244185	2562	0.513119	1.68457	0.80394	1.53462	1.17184	1.37553
ENSSSCT00000003615	ENSSSCG00000003255	CACNG8	6:56157205-56172240	1600	0	0	0	0.0151793	0	0
ENSSSCT00000003617	ENSSSCG00000003256	PRKCG	6:56212589-56234011	3879	0	0.0067505	0.00617648	0.0117439	0.0141871	0.0124134
ENSSSCT00000003618	ENSSSCG00000003257	CACNG6	6:56129833-56150799	1457	0	0	0	4.90321e-07	0	5.18262e-07
ENSSSCT00000003620	ENSSSCG00000003259	OSCAR	6:56022237-56029886	1789	0.0151287	0.0514233	0.0141276	0.201237	0.113453	0.198525
ENSSSCT00000003621	ENSSSCG00000033542	-	6:56075952-56096495	2879	2.42252e-16	0.0101076	0.0272553	0.077471	0.0485128	0.109602
ENSSSCT00000003622	ENSSSCG00000003261	-	6:56018222-56021198	334	29.9777	40.4574	42.373	32.7557	37.5248	34.6168
ENSSSCT00000003623	ENSSSCG00000003262	TFPT	6:56011490-56018169	1244	1.54617	2.13923	1.95951	2.92706	2.26386	2.55957
ENSSSCT00000003624	ENSSSCG00000003263	PRPF31	6:55995094-56011441	1704	3.56358	4.94499	4.11155	4.249	4.0386	4.20548
ENSSSCT00000003625	ENSSSCG00000003264	CNOT3	6:55975631-55991321	2943	0.775535	0.686493	0.469287	1.64152	1.31344	1.46633
ENSSSCT00000003626	ENSSSCG00000003265	LENG1	6:55970647-55976736	1869	1.12484	1.11747	1.10406	1.50886	1.0659	1.09478
ENSSSCT00000003627	ENSSSCG00000003266	TMC4	6:55955981-55970280	2354	5.9657	6.51443	8.33189	6.63168	6.17106	6.26241
ENSSSCT00000003628	ENSSSCG00000003267	MBOAT7	6:55939531-55955838	2719	2.7647	3.35149	3.26507	3.6534	3.80513	3.74888
ENSSSCT00000003629	ENSSSCG00000003268	TSEN34	6:55930736-55939190	1389	4.75545	4.79193	4.32285	3.58677	3.49312	3.64286
ENSSSCT00000003630	ENSSSCG00000003269	LENG9	6:58857799-58860278	2322	0.88928	1.16186	0.829598	1.19239	1.18414	1.08946
ENSSSCT00000003632	ENSSSCG00000003271	TTYH1	6:58874774-58891448	2704	0.0409043	0.0881055	0.0666815	0.0703556	0.0851324	0.111419
ENSSSCT00000003633	ENSSSCG00000029231	-	6:58709126-58715056	1425	4.45223e-09	2.67157e-51	1.52035e-59	8.56003e-24	2.07312e-23	2.16044e-07
ENSSSCT00000003637	ENSSSCG00000034284	-	6:58941156-58949192	1669	0.506256	0.529716	0.742848	0.841591	0.75401	0.75527
ENSSSCT00000003638	ENSSSCG00000026365	-	6:59215639-59233998	1155	0	1.30165e-06	0	0.021983	1.09908e-06	9.61547e-07
ENSSSCT00000003639	ENSSSCG00000003277	-	6:59186264-59204520	2781	0	0	0	0.00833389	0	0.00880896
ENSSSCT00000003641	ENSSSCG00000003278	-	6:59167776-59174470	2177	0.18816	0.061065	0.0772634	0.198862	0.199535	0.141334
ENSSSCT00000003643	ENSSSCG00000003286	-	6:59093560-59133531	2569	0	9.04054e-05	0	7.57537e-05	9.20949e-05	7.81818e-05
ENSSSCT00000003644	ENSSSCG00000022675	NCR1	6:59092654-59100390	2521	2.18803e-05	2.26181e-05	0.0973058	0	2.37756e-05	2.02956e-05
ENSSSCT00000003646	ENSSSCG00000029231	-	6:58743670-58752113	1698	4.21928e-41	0.000284941	0.00027208	0.0419743	0.0251068	0.0104395
ENSSSCT00000003648	ENSSSCG00000003284	FCAR	6:59074295-59085395	3085	0	0	0	0	3.33534e-08	2.91831e-08
ENSSSCT00000003649	ENSSSCG00000022675	NCR1	6:59092654-59100390	2367	0.0669887	0.0227386	7.22585e-05	0	0.095642	0.0627563
ENSSSCT00000003650	ENSSSCG00000003286	-	6:59101769-59133531	2488	0	0.0214846	0	0.0280729	0.011241	0.0296751
ENSSSCT00000003652	ENSSSCG00000003288	HSPBP1	6:59452685-59464705	2329	0.352553	1.01131	0.582384	0.813074	0.833152	0.8426
ENSSSCT00000003653	ENSSSCG00000003289	ISOC2	6:59602102-59609640	1052	3.86926	4.70997	3.11233	2.98109	3.19688	2.98998
ENSSSCT00000003665	ENSSSCG00000003301	PPP6R1	6:59427900-59440973	2643	6.06093	8.67848	6.74897	10.3458	10.256	10.5357
ENSSSCT00000003666	ENSSSCG00000003302	TMEM86B	6:59424133-59426774	1206	0.0471029	0.168347	0.0661297	0.104545	0.101045	0.0442006
ENSSSCT00000003681	ENSSSCG00000003317	ZNF787	6:60423072-60446188	1650	0.455153	0.4362	0.628058	0.580958	0.520961	0.719282
ENSSSCT00000003688	ENSSSCG00000003322	ZNF582	6:60721484-60735772	2050	0.49131	0.514804	0.474669	0.728438	0.600565	0.620105
ENSSSCT00000003690	ENSSSCG00000003324	-	6:60795979-60801387	1929	0.0210628	1.47749e-254	0	4.73808e-174	0	6.75513e-195
ENSSSCT00000003692	ENSSSCG00000003326	-	6:61284229-61307764	6143	0.107104	0.00285837	0.24621	0.123686	3.55093e-05	0.000141752
ENSSSCT00000003696	ENSSSCG00000003329	ACAP3	6:63575927-63593438	7415	0.795323	1.07577	0.759328	1.0502	0.894243	0.989206
ENSSSCT00000003697	ENSSSCG00000038351	-	6:63516375-63520039	726	0	0	0	0	0.0825016	0
ENSSSCT00000003698	ENSSSCG00000003331	TNFRSF4	6:63524076-63526641	849	0	0	1.82079e-129	0	0	0
ENSSSCT00000003699	ENSSSCG00000003332	SDF4	6:63529852-63544788	1583	7.8638	5.16051	2.49426	4.6114	5.2922	5.15255
ENSSSCT00000003700	ENSSSCG00000003333	C1QTNF12	6:63548863-63553332	1197	1.63914	0.994613	0.933894	1.28654	1.42693	1.35984
ENSSSCT00000003701	ENSSSCG00000003334	UBE2J2	6:63556139-63568014	1290	5.97389	5.83137	5.24194	6.40539	6.9437	6.85219
ENSSSCT00000003707	ENSSSCG00000003338	PUSL1	6:63593958-63596910	1275	0.883821	1.26321	0.930258	1.11791	1.65863	1.47183
ENSSSCT00000003708	ENSSSCG00000003339	INTS11	6:63593900-63607878	5185	0.0639473	0.124113	0.289131	0.336588	0.554958	0.496815
ENSSSCT00000003710	ENSSSCG00000003341	TAS1R3	6:63610524-63617831	6359	0.0978795	0.134192	0.0987009	0.143701	0.129262	0.120461
ENSSSCT00000003711	ENSSSCG00000003342	DVL1	6:63618652-63629279	2487	7.11806	5.80419	4.15273	5.28762	6.84877	5.98252
ENSSSCT00000003712	ENSSSCG00000003343	-	6:63706115-63722384	3349	1.26784	1.86601	1.56343	1.78061	1.7374	1.92555
ENSSSCT00000003713	ENSSSCG00000003344	VWA1	6:63695169-63700287	2464	2.06678	4.18613	2.59654	3.93686	3.64637	3.79511
ENSSSCT00000003715	ENSSSCG00000003346	ANKRD65	6:63680992-63682758	1161	0.123045	0.125669	0.0230397	0.065553	0.0791983	0.0461919
ENSSSCT00000003717	ENSSSCG00000003348	-	6:63727679-63755198	1962	11.5846	10.4437	13.7375	9.57972	11.4999	10.4462
ENSSSCT00000003719	ENSSSCG00000003350	MIB2	6:63789655-63800311	3069	3.29795	3.38157	3.65606	4.47121	3.96988	4.12927
ENSSSCT00000003720	ENSSSCG00000003351	MMP23B	6:63801964-63804238	1518	4.84476	3.09154	4.68049	1.44876	1.94475	1.63341
ENSSSCT00000003721	ENSSSCG00000003352	-	6:63805003-63819902	2609	1.97285	2.65614	2.64704	4.5669	3.81457	4.03526
ENSSSCT00000003722	ENSSSCG00000003353	-	6:63820805-63841674	5290	1.32147	2.97601	1.97167	2.03414	1.84834	1.8016
ENSSSCT00000003723	ENSSSCG00000003354	CCNL2	6:63659190-63668040	2899	6.16196	7.3735	5.43452	7.85181	9.72658	8.46839
ENSSSCT00000003728	ENSSSCG00000003359	TPRG1L	6:65150890-65155308	2470	3.22263	5.4475	4.56835	4.17052	5.68949	5.31789
ENSSSCT00000003729	ENSSSCG00000003360	WRAP73	6:65151129-65167011	5564	0.032477	0.178896	0.0979791	0.168697	0.164406	0.161317
ENSSSCT00000003731	ENSSSCG00000003362	CEP104	6:65276662-65306798	2616	0.479315	0.580618	0.278628	0.488589	0.500618	0.498533
ENSSSCT00000003736	ENSSSCG00000003366	CHD5	6:67017416-67069523	8946	0.0972021	0.134015	0.0520731	0.132152	0.18667	0.179423
ENSSSCT00000003738	ENSSSCG00000003368	RNF207	6:67105762-67118145	5358	0.0237176	0.00482868	0.00441722	0.00420047	0	0
ENSSSCT00000003739	ENSSSCG00000003369	ICMT	6:67116944-67160510	4060	3.62962	6.02442	3.89003	7.63232	6.64681	7.13428
ENSSSCT00000003741	ENSSSCG00000003371	GPR153	6:67138960-67144398	1794	0.482638	0.338353	0.492948	1.1636	1.01795	1.10268
ENSSSCT00000003744	ENSSSCG00000003374	ESPN	6:67284277-67315783	2556	2.93935e-05	0.00526099	0.0202086	2.57271e-05	1.1738e-06	0
ENSSSCT00000003745	ENSSSCG00000003376	PLEKHG5	6:67316818-67352084	6246	0.16175	0.375081	0.0985089	0.481349	0.577507	0.52189
ENSSSCT00000003746	ENSSSCG00000003376	PLEKHG5	6:67322120-67365701	3906	0.634696	0.844075	0.504722	1.21734	0.800991	1.01898
ENSSSCT00000003747	ENSSSCG00000003377	ACOT7	6:67152429-67253272	1417	0.352831	0.180027	0.256575	0.641353	0.334402	0.438592
ENSSSCT00000003750	ENSSSCG00000003379	KLHL21	6:67420621-67434812	5135	3.9401	2.99688	2.83388	2.90541	3.04857	3.00611
ENSSSCT00000003751	ENSSSCG00000040001	TNFRSF25	6:67316825-67321407	1425	0.0514601	0.0416888	0.101509	4.00738e-06	1.6298e-06	1.07917e-06
ENSSSCT00000003753	ENSSSCG00000003382	TAS1R1	6:67397366-67409973	2535	0.384025	0.380711	0.532389	0.386312	0.377798	0.466666
ENSSSCT00000003754	ENSSSCG00000003383	ZBTB48	6:67410549-67421216	5241	1.76579e-05	0.106815	0.000215581	0.379037	0.232896	0.211887
ENSSSCT00000003755	ENSSSCG00000003384	DNAJC11	6:67463359-67529930	2257	4.80748	4.44429	4.63879	4.69877	4.46818	4.7023
ENSSSCT00000003756	ENSSSCG00000003385	PARK7	6:68628834-68646312	2295	11.0487	13.3423	11.837	13.0163	12.0531	12.5793
ENSSSCT00000003757	ENSSSCG00000003386	TNFRSF9	6:68590566-68609687	2166	0.0368607	0	0.0343949	0	0.0131573	0.0115119
ENSSSCT00000003759	ENSSSCG00000003388	SLC45A1	6:68933896-68952218	4267	0	0.00611231	0	0.0053169	0	0.00562002
ENSSSCT00000003761	ENSSSCG00000003390	SLC2A7	6:69481118-69503994	5239	0.250265	0.3676	0.201529	0.247793	0.227854	0.213771
ENSSSCT00000003762	ENSSSCG00000003391	CA6	6:69447418-69469197	1941	0	0.0564328	0	0.0245388	0.0148225	0.0259374
ENSSSCT00000003764	ENSSSCG00000003393	TMEM201	6:69973396-69998544	4071	0.000112295	0.26727	0.218619	0.586182	0.553015	0.572442
ENSSSCT00000003766	ENSSSCG00000003395	PIK3CD	6:70026372-70095839	4927	0.244979	0.474555	0.416042	0.6301	0.703945	0.623155
ENSSSCT00000003767	ENSSSCG00000003396	CLSTN1	6:70082967-70114379	7400	0.126343	0.254437	0.0774994	0.411534	0.260506	0.272956
ENSSSCT00000003769	ENSSSCG00000003398	UBE4B	6:70345812-70462430	6105	0.169776	0.302149	0.421926	0.136507	0.403895	0.288878
ENSSSCT00000003771	ENSSSCG00000003399	RBP7	6:70313308-70326455	612	4.95238	1.11721	1.59237	1.45563	1.58301	1.33334
ENSSSCT00000003772	ENSSSCG00000003400	NMNAT1	6:70271405-70307406	3396	0.96597	2.4425	2.08037	2.04891	2.474	2.37452
ENSSSCT00000003773	ENSSSCG00000003401	KIF1B	6:70511205-70659680	5313	0.748895	1.44372	1.13355	0.688153	1.23508	1.05523
ENSSSCT00000003774	ENSSSCG00000003402	PGD	6:70675886-70692285	1428	5.98502	14.5546	9.17444	13.3452	15.8102	14.616
ENSSSCT00000003775	ENSSSCG00000027822	CORT	6:70716295-70718268	949	0	0	0	0.0277386	0	0
ENSSSCT00000003776	ENSSSCG00000003403	CENPS	6:70701584-70712465	1592	1.32504	0.965449	1.1255	0.595305	0.774516	0.629231
ENSSSCT00000003777	ENSSSCG00000003404	DFFA	6:70725417-70736269	1885	8.88672	8.44884	8.0967	7.20821	6.82575	7.04326
ENSSSCT00000003778	ENSSSCG00000003405	PEX14	6:70737904-70872072	1835	8.03369	9.32889	8.02396	8.59908	8.4997	8.12466
ENSSSCT00000003780	ENSSSCG00000003407	CASZ1	6:70880373-70933883	4845	3.91803e-05	1.64488e-05	1.47649e-05	1.92287e-05	9.27572e-06	1.30581e-05
ENSSSCT00000003785	ENSSSCG00000003412	EXOSC10	6:71256919-71282493	4934	1.83864	2.79189	2.41942	3.05066	2.76812	2.84267
ENSSSCT00000003786	ENSSSCG00000003413	MTOR	6:71286993-71448662	8705	3.51477	5.32081	3.96553	6.3705	5.7752	5.8433
ENSSSCT00000003787	ENSSSCG00000003414	ANGPTL7	6:71350985-71358671	3444	0.0375329	0.0833803	0.0551183	4.15208e-06	0.120504	4.76512e-05
ENSSSCT00000003790	ENSSSCG00000003417	DISP3	6:71583817-71640940	5462	0	0	0	0	0.00497473	0.00435283
ENSSSCT00000003793	ENSSSCG00000003419	MAD2L2	6:71773681-71779172	1101	3.90414	4.3338	4.52821	4.30965	3.79404	4.18164
ENSSSCT00000003794	ENSSSCG00000003420	FBXO6	6:71755358-71774261	2032	1.4054	0.88895	1.36664	1.38039	1.20606	1.95266
ENSSSCT00000003795	ENSSSCG00000003421	FBXO44	6:71747716-71754515	1866	0.292929	1.27708	0.50392	1.12935	0.565743	0.865944
ENSSSCT00000003797	ENSSSCG00000003423	DRAXIN	6:71798606-71814771	5973	0.00830187	0.00412799	0	0	0.0043364	0.00379431
ENSSSCT00000003798	ENSSSCG00000003423	DRAXIN	6:71798606-71814771	6063	0.000178903	0.000186679	0	0	0.000197783	0.000173059
ENSSSCT00000003805	ENSSSCG00000003428	MTHFR	6:71864744-71881832	5287	0.40394	0.101929	0.186229	0.0765752	0.44473	0.256547
ENSSSCT00000003807	ENSSSCG00000003429	CLCN6	6:71881924-71916023	5770	0.210971	0.326593	0.200533	0.790049	0.465448	0.649974
ENSSSCT00000003809	ENSSSCG00000003431	NPPB	6:71930373-71932254	1081	0	0	0.0501058	0	0	0
ENSSSCT00000003810	ENSSSCG00000003432	KIAA2013	6:71976017-71981775	2515	12.1582	14.4894	13.5358	11.915	11.0845	11.2453
ENSSSCT00000003811	ENSSSCG00000003433	PLOD1	6:71987932-72019707	4099	3.18803	4.25113	3.0059	5.53039	4.81915	5.28314
ENSSSCT00000003812	ENSSSCG00000003434	MFN2	6:72027979-72056435	4674	0.810542	0.946756	0.00761575	1.17846	0.914448	0.928951
ENSSSCT00000003813	ENSSSCG00000003435	MIIP	6:72064644-72075228	1807	1.22701	2.42603	1.92823	1.87092	2.16407	2.13183
ENSSSCT00000003815	ENSSSCG00000003437	TNFRSF8	6:72129594-72171235	1682	5.73989e-05	0.033027	0	0.0356719	2.4618e-07	0.0224863
ENSSSCT00000003816	ENSSSCG00000003438	VPS13D	6:72256821-72510055	13401	0.0256701	0.180784	0.215666	1.21783e-09	0.0983003	4.19121e-09
ENSSSCT00000003817	ENSSSCG00000003439	DHRS3	6:72556233-72599238	2379	17.1068	17.6362	18.662	17.869	13.6302	15.3182
ENSSSCT00000003820	ENSSSCG00000003440	AADACL4	6:72632751-72650538	1233	0.0229594	0	0	0	0.0246241	0
ENSSSCT00000003832	ENSSSCG00000003451	-	6:73019056-73049996	2413	0.447212	0.75808	0.4898	1.23105	0.599317	1.02626
ENSSSCT00000003834	ENSSSCG00000003453	-	6:73137756-73238288	792	1.48012	1.63495	0.988448	1.45544	1.88415	1.61158
ENSSSCT00000003836	ENSSSCG00000003455	FHAD1	6:74508096-74641442	4796	1.1414e-05	0.0615649	3.58064e-07	6.77889e-06	5.59307e-08	0.000171125
ENSSSCT00000003837	ENSSSCG00000003455	FHAD1	6:74508101-74629778	4373	8.99923e-05	0.0887311	2.84529e-05	0.14269	0.0881667	0.0865788
ENSSSCT00000003841	ENSSSCG00000003458	EFHD2	6:74651796-74668434	2456	9.80195	15.217	14.69	25.2139	23.8624	24.8811
ENSSSCT00000003844	ENSSSCG00000003459	CELA2A	6:74691652-74707598	919	0	0	0	0.0288382	0	0.0304808
ENSSSCT00000003846	ENSSSCG00000003460	CASP9	6:74706333-74730046	3764	1.02593	1.70828	1.33108	3.01369	1.62496	2.29281
ENSSSCT00000003847	ENSSSCG00000003461	RSC1A1	6:74809372-74851067	5342	6.2019	6.62757	7.03082	6.11617	6.94397	6.61383
ENSSSCT00000003849	ENSSSCG00000003463	AGMAT	6:74773016-74782781	1624	0.0168324	0.0429229	0.116259	0.0746504	0.0811672	0.0933706
ENSSSCT00000003850	ENSSSCG00000003464	DNAJC16	6:74732370-74771402	5617	1.06859	1.0241	0.786505	1.51198	1.06193	1.1028
ENSSSCT00000003851	ENSSSCG00000003465	FBLIM1	6:74931819-74962280	2806	0.286261	1.07331	0.299552	1.54097	0.88367	1.00859
ENSSSCT00000003852	ENSSSCG00000003466	TMEM82	6:74915706-74920121	1434	2.54753e-171	0	8.5384e-144	0.0514816	0	0.0362769
ENSSSCT00000003854	ENSSSCG00000003468	PLEKHM2	6:74865130-74907766	4008	3.77396	5.07412	4.73713	8.52432	7.99972	8.41612
ENSSSCT00000003855	ENSSSCG00000026345	-	6:75179588-75192255	2064	0.00139212	0.277103	0.00132129	0.0012541	0.138638	0.00133202
ENSSSCT00000003856	ENSSSCG00000003470	FAM131C	6:75193400-75212086	1743	5.77827	5.19446	3.71938	3.95103	2.62804	3.14184
ENSSSCT00000003857	ENSSSCG00000003471	EPHA2	6:75251460-75279314	4145	0.68243	1.55985	0.927945	1.30418	1.42325	1.41908
ENSSSCT00000003858	ENSSSCG00000003472	ARHGEF19	6:75317822-75335270	2990	0.243908	0.390424	0.238061	0.426801	0.331023	0.38393
ENSSSCT00000003859	ENSSSCG00000003473	CPLANE2	6:75345258-75349943	1324	9.04477e-05	0.386485	8.40898e-05	7.96947e-05	9.37733e-05	8.19151e-05
ENSSSCT00000003862	ENSSSCG00000003476	-	6:75485988-75517253	1950	4.37152e-06	4.92919e-06	0	3.97087e-06	0	9.14035e-08
ENSSSCT00000003863	ENSSSCG00000003477	NECAP2	6:75527068-75543245	2213	17.5776	18.9533	20.4672	10.3473	13.8331	11.4488
ENSSSCT00000003864	ENSSSCG00000003478	-	6:75559229-75605794	5898	0.489752	0.463515	0.250584	0.281452	0.813514	0.515311
ENSSSCT00000003865	ENSSSCG00000003479	MFAP2	6:75607520-75615423	1333	1.53665	1.52132	1.02385	2.30146	1.84207	2.03052
ENSSSCT00000003867	ENSSSCG00000003482	PADI3	6:75874246-75908508	1911	0	0	0	0.0123989	0	0.0131056
ENSSSCT00000003868	ENSSSCG00000003482	PADI3	6:75874246-75908508	1995	0	0	0	1.20165e-05	0	1.27014e-05
ENSSSCT00000003869	ENSSSCG00000003483	-	6:75948917-75966025	1731	0	0.0799865	1.75244e-05	0.0993747	0.0840333	0.147045
ENSSSCT00000003870	ENSSSCG00000003484	PADI6	6:75969885-75987096	2364	0	0.0341907	0.0104327	0.0198245	0.0359242	0.041909
ENSSSCT00000003871	ENSSSCG00000003485	RCC2	6:75988271-76014158	4068	4.10773	5.95708	3.26602	6.46018	5.21671	5.89639
ENSSSCT00000003872	ENSSSCG00000003486	ARHGEF10L	6:76117766-76229301	4330	0.378484	0.448163	0.618211	0.559714	0.973068	0.897724
ENSSSCT00000003874	ENSSSCG00000003488	UBR4	6:77568726-77707930	15547	8.81236	14.196	10.9067	15.9408	15.3083	15.5841
ENSSSCT00000003876	ENSSSCG00000003489	EMC1	6:77724506-77747591	2932	1.19296	0.977969	0.674237	2.01213	2.19316	2.14916
ENSSSCT00000003878	ENSSSCG00000003491	AKR7A2	6:77754172-77761667	1456	2.54767	5.16036	3.25247	5.81972	5.99157	5.88391
ENSSSCT00000003879	ENSSSCG00000003492	PQLC2	6:77761860-77778569	1811	2.14322	3.609	2.81373	4.7559	4.17794	4.47989
ENSSSCT00000003880	ENSSSCG00000003493	CAPZB	6:77780685-77853538	1676	0.745156	1.63909	0.953442	2.01837	1.59175	1.80582
ENSSSCT00000003881	ENSSSCG00000003493	CAPZB	6:77784229-77872320	834	7.13985e-06	1.54535	0.658659	1.49033	0.914959	0.980821
ENSSSCT00000003886	ENSSSCG00000003498	UBXN10	6:78456993-78465769	2954	0.0176464	0	0	0	0	0
ENSSSCT00000003894	ENSSSCG00000003505	DDOST	6:78885267-78895720	1596	27.0073	26.8338	27.397	26.8408	26.7839	27.5857
ENSSSCT00000003896	ENSSSCG00000003506	PINK1	6:78863288-78886692	5025	6.64939	9.12697	8.08521	6.21155	6.3923	6.11501
ENSSSCT00000003898	ENSSSCG00000003508	KIF17	6:78898382-78952925	3042	0	0.008713	0	0	0	0
ENSSSCT00000003899	ENSSSCG00000003509	SH2D5	6:78954508-78967384	3448	0.0074971	0.0229075	0	0	0	0
ENSSSCT00000003901	ENSSSCG00000003511	HP1BP3	6:78975559-79007927	3356	3.13994e-21	1.27292e-08	1.22967e-25	8.48379e-31	7.05768e-11	6.44068e-15
ENSSSCT00000003902	ENSSSCG00000003512	EIF4G3	6:79022990-79249227	5091	1.63957	1.76392	1.7638	3.12441	3.22177	3.4755
ENSSSCT00000003903	ENSSSCG00000003513	ECE1	6:79410668-79466047	2301	5.11168	12.5423	8.03387	13.3624	11.7974	12.7705
ENSSSCT00000003904	ENSSSCG00000003514	HSPG2	6:79850756-79921097	13013	1.11996	2.78972	1.24313	4.24058	3.35659	3.0291
ENSSSCT00000003906	ENSSSCG00000024197	USP48	6:79745450-79810724	3369	0.827176	0.745722	1.15405	1.30558	1.16045	1.11456
ENSSSCT00000003910	ENSSSCG00000003520	-	6:80035047-80090934	3846	1.35378	2.12112	1.24238	1.4262	1.81865	1.77187
ENSSSCT00000003912	ENSSSCG00000003521	-	6:80112276-80123081	1255	0.0921154	0.281026	0.189464	0.29265	0.425255	0.440005
ENSSSCT00000003913	ENSSSCG00000026276	ZBTB40	6:80449467-80485378	5602	0.391135	0.619314	0.545901	0.722818	0.724679	0.698561
ENSSSCT00000003915	ENSSSCG00000003524	C1QA	6:80586182-80589939	1772	11.9397	11.3552	13.7519	18.8981	8.40181	13.8613
ENSSSCT00000003918	ENSSSCG00000003527	-	6:80650732-80843567	4012	0.109824	0.0651656	0.0255775	0.0761653	0.17563	0.179376
ENSSSCT00000003922	ENSSSCG00000003531	KDM1A	6:80903357-80971560	2630	9.90688e-14	0.0811149	2.43693e-14	0.166152	2.42787e-24	9.53574e-11
ENSSSCT00000003923	ENSSSCG00000003531	KDM1A	6:80903427-80973632	4761	0.81586	1.97724	0.845999	1.22112	1.35622	1.32973
ENSSSCT00000003924	ENSSSCG00000003532	LUZP1	6:80973260-81066266	7441	0.576777	1.79599	0.456764	0.633299	2.53408	1.35454
ENSSSCT00000003931	ENSSSCG00000003539	GRHL3	6:82016754-82050236	2806	0.329735	0.54898	0.550309	0.659868	0.603618	0.602267
ENSSSCT00000003933	ENSSSCG00000003541	STPG1	6:82053704-82102928	1008	0.2033	0.0593687	0.190565	0.0516074	0.0311756	0.0545472
ENSSSCT00000003934	ENSSSCG00000024818	RCAN3	6:82195571-82224268	929	0.459634	0.313507	1.01468	0.94887	0.342249	0.834182
ENSSSCT00000003935	ENSSSCG00000003543	NIPAL3	6:82111640-82198909	5300	2.88172	4.13016	4.46288	4.09541	4.9087	4.40315
ENSSSCT00000003939	ENSSSCG00000003546	-	6:82298534-82298936	402	2.32397	0	0	0.811384	0	0.408724
ENSSSCT00000003940	ENSSSCG00000003547	NCMAP	6:82275776-82280957	267	1.59075	0.479876	2.2436	0.621522	0	0
ENSSSCT00000003942	ENSSSCG00000003549	LDLRAP1	6:83030631-83054384	2847	8.00926	7.0282	8.88713	5.99922	6.1279	6.42713
ENSSSCT00000003945	ENSSSCG00000003551	PAQR7	6:83318410-83326834	2300	2.18288e-06	3.12747e-05	5.85078e-06	0.000182104	5.20665e-06	1.17994e-05
ENSSSCT00000003946	ENSSSCG00000003552	AUNIP	6:83272800-83316418	1882	0.543864	0.853655	0.775007	1.0533	1.03485	0.945658
ENSSSCT00000003947	ENSSSCG00000003553	MTFR1L	6:83265388-83276957	2394	2.21422	5.16101	3.92663	4.52133	5.10523	4.89071
ENSSSCT00000003948	ENSSSCG00000003554	SELENON	6:83246933-83260993	1725	0.771599	1.81467	1.45603	3.98008	2.69942	3.21792
ENSSSCT00000003949	ENSSSCG00000003555	HMGN2	6:83858172-83861905	1299	10.8639	9.89654	11.0063	10.6533	9.71239	9.70921
ENSSSCT00000003952	ENSSSCG00000003558	RPS6KA1	6:83905076-83947185	3007	2.58818e-05	0.250522	1.59851e-05	2.83998e-05	0.000111732	2.2459e-05
ENSSSCT00000003953	ENSSSCG00000003559	ARID1A	6:84049394-84123349	6190	2.20314	3.13353	3.50807	5.68378	5.77671	5.88718
ENSSSCT00000003954	ENSSSCG00000040007	PIGV	6:84129963-84139247	2413	2.40393	3.99112	4.41175	2.96758	3.12584	3.31948
ENSSSCT00000003955	ENSSSCG00000003561	ZDHHC18	6:84153716-84186885	4873	4.22303e-07	2.75088e-05	0.0567027	3.66408e-06	1.78393e-06	2.62555e-06
ENSSSCT00000003956	ENSSSCG00000003561	ZDHHC18	6:84153716-84189994	2810	0.685389	0.550902	0.583526	1.30395	0.949201	1.10458
ENSSSCT00000003958	ENSSSCG00000003564	GPATCH3	6:84200723-84218773	3963	0.975566	1.53466	1.54976	1.99142	1.69309	1.78702
ENSSSCT00000003959	ENSSSCG00000003565	NR0B2	6:84225237-84229681	3171	0.00982509	0.0271029	0.0490263	0.0145073	0.012414	0.0083061
ENSSSCT00000003960	ENSSSCG00000003566	NUDC	6:84238702-84252037	1239	6.53837	9.12004	7.99401	9.02861	9.49875	9.54763
ENSSSCT00000003961	ENSSSCG00000003567	KDF1	6:84254500-84265018	1801	2.61316	3.07811	2.95906	3.38266	3.49129	3.74436
ENSSSCT00000003963	ENSSSCG00000003569	SLC9A1	6:84372647-84426976	4692	5.17929	2.72506	6.17177	3.35336	3.87055	3.64131
ENSSSCT00000003964	ENSSSCG00000003570	WDTC1	6:84449046-84534785	2571	2.54598	3.14196	2.71102	6.28316	5.05251	5.3711
ENSSSCT00000003966	ENSSSCG00000003572	SYTL1	6:84564246-84573203	1943	3.15073	2.52268	4.99371	2.16632	2.73909	2.42117
ENSSSCT00000003967	ENSSSCG00000003573	MAP3K6	6:84573328-84585392	5012	0.463437	0.703302	0.391351	1.34124	1.08145	1.28254
ENSSSCT00000003969	ENSSSCG00000003575	CD164L2	6:84597397-84603398	2499	0.0632323	0.0644296	0.0294874	0.102736	0.0225658	0.0493599
ENSSSCT00000003970	ENSSSCG00000003576	GPR3	6:84610106-84613202	2074	0	0	0	0.0114158	0	0
ENSSSCT00000003971	ENSSSCG00000003577	WASF2	6:84621745-84697426	5289	3.58127	4.91914	3.99764	8.22225	6.51541	7.35555
ENSSSCT00000003972	ENSSSCG00000003578	FGR	6:84810807-84823617	1928	0.233342	1.22955	0.698183	2.55302	2.01311	2.63898
ENSSSCT00000003974	ENSSSCG00000003579	AHDC1	6:84735686-84757808	5548	0.000189304	0.000209129	0.000180872	0.000302352	0.127197	0.0856063
ENSSSCT00000003975	ENSSSCG00000003580	EYA3	6:85095412-85185861	5889	0.604268	0.247439	1.43257	1.25389	1.01061	1.48525
ENSSSCT00000003977	ENSSSCG00000003582	SMPDL3B	6:85060325-85084480	2043	22.5869	34.0768	13.3871	149.481	60.6619	106.824
ENSSSCT00000003978	ENSSSCG00000003583	RPA2	6:85032553-85045930	1603	3.17636	3.69294	3.19112	4.71093	3.31231	3.92268
ENSSSCT00000003979	ENSSSCG00000003584	THEMIS2	6:85010745-85030723	5555	0.17535	0.309706	0.20853	0.520354	0.295608	0.404718
ENSSSCT00000003981	ENSSSCG00000003586	EPB41	6:85922218-85990258	2341	0.839646	1.33408	1.08902	1.45082	0.99086	1.3584
ENSSSCT00000003983	ENSSSCG00000003589	SRSF4	6:86064600-86092687	2582	0.00369574	1.56132	0.359588	0.453052	1.70313	1.64835
ENSSSCT00000003984	ENSSSCG00000003589	SRSF4	6:86094394-86131664	6614	0.664505	1.03546	0.767931	1.45893	1.0975	1.24818
ENSSSCT00000003985	ENSSSCG00000003590	PTPRU	6:86137753-86228145	5578	1.41487	2.95262	2.20783	3.70004	3.12016	3.55658
ENSSSCT00000003986	ENSSSCG00000003591	PUM1	6:87547774-87687442	3583	0.12773	0.996798	0.231388	1.48093	1.08338	1.38989
ENSSSCT00000003987	ENSSSCG00000003592	SDC3	6:87495042-87535845	5378	0.170105	0.5979	0.364681	0.332882	1.19498	0.577232
ENSSSCT00000003991	ENSSSCG00000003596	SNRNP40	6:87838891-87879623	2048	1.67099	2.60825	1.69357	3.02061	2.3349	2.89919
ENSSSCT00000003995	ENSSSCG00000003600	TINAGL1	6:88095634-88106088	1874	63.4501	35.7262	53.5642	52.1766	43.4017	46.5768
ENSSSCT00000003996	ENSSSCG00000003601	HCRTR1	6:88139622-88149531	1775	0.152598	0.186731	0.199507	0.433031	0.653931	0.443408
ENSSSCT00000003998	ENSSSCG00000003603	COL16A1	6:88177846-88239392	5095	1.20934	2.35646	0.807632	2.65121	1.53633	2.11999
ENSSSCT00000003999	ENSSSCG00000003604	ADGRB2	6:88256148-88286558	4955	0.0100858	0.0364437	0.0189709	0.0180404	8.56563e-06	4.32353e-06
ENSSSCT00000004001	ENSSSCG00000003606	SPOCD1	6:88323285-88349266	3429	0.0150832	0	0	0	0	0
ENSSSCT00000004003	ENSSSCG00000003608	LCK	6:88719880-88746471	2962	0.422305	0.690076	0.574126	0.23323	0.386096	0.271903
ENSSSCT00000004005	ENSSSCG00000003610	IQCC	6:88681163-88685499	2131	0.927406	1.07906	0.759474	1.11485	0.978219	0.964831
ENSSSCT00000004007	ENSSSCG00000003612	EIF3I	6:88695925-88705076	1100	15.9072	25.5228	19.078	19.4474	22.18	20.9981
ENSSSCT00000004008	ENSSSCG00000003613	HDAC1	6:88749628-88784653	1590	0.0539064	0.0523398	0.180296	0.136285	0.200303	0.135087
ENSSSCT00000004009	ENSSSCG00000003613	HDAC1	6:88749192-88786905	4953	0.237269	0.220995	0.261626	0.421516	0.295614	0.354347
ENSSSCT00000004011	ENSSSCG00000003616	FAM167B	6:88715793-88717269	874	0.758661	1.34058	0.971168	2.08497	1.66705	1.94446
ENSSSCT00000004012	ENSSSCG00000003617	TXLNA	6:88660405-88675369	5081	5.32011	6.01483	5.29583	6.35303	6.85869	6.68995
ENSSSCT00000004015	ENSSSCG00000003619	AZIN2	6:89346931-89384979	1381	0.70627	0.659019	0.415133	0.752084	0.432674	0.662451
ENSSSCT00000004016	ENSSSCG00000003620	TRIM62	6:89404095-89442896	5900	0.0730248	0.0827249	1.99863e-05	0.261148	0.166972	0.246478
ENSSSCT00000004017	ENSSSCG00000003621	ZSCAN20	6:89732663-89754719	4824	1.22647	1.75988	1.4623	2.37827	2.51107	2.54355
ENSSSCT00000004018	ENSSSCG00000003622	CSMD2	6:89784254-90208433	10281	0.02163	0.0177158	2.25101e-06	4.27651e-06	0.0530798	0.0448223
ENSSSCT00000004023	ENSSSCG00000003627	ZMYM4	6:91456150-91621368	4479	1.15568	1.34581	1.09455	0.788689	1.4617	1.02219
ENSSSCT00000004024	ENSSSCG00000003628	CLSPN	6:91906284-91941344	5660	0.54235	0.423653	0.423729	0.402115	0.36104	0.413896
[truncated: 39,466 more rows]
