# Supplementary material for: Emerging Roles of Heat-Induced circRNAs Related to Lactogenesis in Lactating Sows
Source: Front Genet. 2020 Feb 11;10:1347. doi: 10.3389/fgene.2019.01347 (PMC7027193; doi:10.3389/fgene.2019.01347)
Supplement: Supplementary file 5 [file Table_3.xlsx]

## Sheet: CIRCexplorer2
Identification of circRNAs by CIRCexplorer2
Chrom	Start	End	Strand	Number of exons	Type of circular RNA#	Hosting isoform	Index of exon or intron	Left intron/Right intron
chr1	10905	18696	-	3	circRNA	ENSSSCT00000046027	3,2,1	1:5760-10905|None
chr1	27359	33429	+	3	circRNA	ENSSSCT00000058189	2,3,4	1:23965-27359|1:33429-38650
chr1	128197	132692	-	3	circRNA	ENSSSCT00000055371	9,8,7	1:96363-128197|1:132692-147380
chr1	593017	598149	+	2	circRNA	ENSSSCT00000004431	4,5	1:586887-593017|1:598149-600485
chr1	593017	611340	+	11	circRNA	ENSSSCT00000004431	4,5,6,7,8,9,10,11,12,13,14	1:586887-593017|1:611340-617144
chr1	593017	619011	+	13	circRNA	ENSSSCT00000004431	4,5,6,7,8,9,10,11,12,13,14,15,16	1:586887-593017|1:619011-626316
chr1	626316	653683	+	9	circRNA	ENSSSCT00000004431	17,18,19,20,21,22,23,24,25	1:619011-626316|1:653683-719871
chr1	641933	653683	+	3	circRNA	ENSSSCT00000004431	23,24,25	1:635254-641933|1:653683-719871
chr1	1600086	1611154	-	7	circRNA	ENSSSCT00000004443	23,22,21,20,19,18,17	1:1588947-1600086|1:1611154-1611854
chr1	1600086	1620039	-	12	circRNA	ENSSSCT00000004443	23,22,21,20,19,18,17,16,15,14,13,12	1:1588947-1600086|1:1620039-1625112
chr1	1600086	1663793	-	22	circRNA	ENSSSCT00000004443	23,22,21,20,19,18,17,16,15,14,13,12,11,10,9,8,7,6,5,4,3,2	1:1588947-1600086|1:1663793-1664543
chr1	1633213	1634815	-	2	circRNA	ENSSSCT00000004443	8,7	1:1630334-1633213|1:1634815-1639165
chr1	1633213	1663793	-	7	circRNA	ENSSSCT00000004443	8,7,6,5,4,3,2	1:1630334-1633213|1:1663793-1664543
chr1	1639165	1663793	-	5	circRNA	ENSSSCT00000004443	6,5,4,3,2	1:1634815-1639165|1:1663793-1664543
chr1	1654691	1663793	-	4	circRNA	ENSSSCT00000004443	5,4,3,2	1:1639323-1654691|1:1663793-1664543
chr1	1657902	1663793	-	3	circRNA	ENSSSCT00000004443	4,3,2	1:1654852-1657902|1:1663793-1664543
chr1	3314471	3324464	+	5	circRNA	ENSSSCT00000004453	7,8,9,10,11	1:3302802-3314471|1:3324464-3331635
chr1	4775754	4843415	-	3	circRNA	ENSSSCT00000057600	4,3,2	1:4747056-4775754|1:4843415-4881815
chr1	7429735	7433694	-	4	circRNA	ENSSSCT00000004472	10,9,8,7	1:7424450-7429735|1:7433694-7435775
chr1	7594611	7598381	+	2	circRNA	ENSSSCT00000004476	7,8	1:7593988-7594611|1:7598381-7598842
chr1	7594611	7599773	+	5	circRNA	ENSSSCT00000004476	7,8,9,10,11	1:7593988-7594611|1:7599773-7600412
chr1	8434506	8444226	+	5	circRNA	ENSSSCT00000004487	4,5,6,7,8	1:8429647-8434506|1:8444226-8448683
chr1	8586432	8598060	-	5	circRNA	ENSSSCT00000026720	8,7,6,5,4	1:8576855-8586432|1:8598060-8635294
chr1	8692073	8698741	-	3	circRNA	ENSSSCT00000050178	6,5,4	1:8681029-8692073|1:8698741-8729491
chr1	8949348	8964165	+	5	circRNA	ENSSSCT00000013465	2,3,4,5,6	1:8935179-8949348|1:8964165-8975155
chr1	9034251	9041185	-	5	circRNA	ENSSSCT00000025405	17,16,15,14,13	1:9032893-9034251|1:9041185-9041997
chr1	9060509	9069255	-	2	circRNA	ENSSSCT00000025405	5,4	1:9053697-9060509|1:9069255-9073844
chr1	9191140	9192687	-	2	circRNA	ENSSSCT00000053140	4,3	1:9169598-9191140|1:9192687-9195338
chr1	9191140	9195425	-	3	circRNA	ENSSSCT00000053140	4,3,2	1:9169598-9191140|1:9195425-9238739
chr1	9893444	9923857	-	2	circRNA	ENSSSCT00000053144	3,2	1:9873537-9893444|1:9923857-10070671
chr1	10070671	10175846	-	3	circRNA	ENSSSCT00000049334	4,3,2	1:9976196-10070671|1:10175846-10225735
chr1	11929990	12043885	-	3	circRNA	ENSSSCT00000062929	22,21,20	None|1:12043885-12046382
chr1	12041131	12042596	-	1	circRNA	ENSSSCT00000062929	21	1:11930067-12041131|1:12042596-12043666
chr1	12041131	12043885	-	2	circRNA	ENSSSCT00000062929	21,20	1:11930067-12041131|1:12043885-12046382
chr1	12056479	12061089	-	4	circRNA	ENSSSCT00000062929	14,13,12,11	1:12053708-12056479|1:12061089-12064956
chr1	12071469	12074918	-	3	circRNA	ENSSSCT00000062929	7,6,5	1:12068619-12071469|1:12074918-12082333
chr1	12361986	12376129	+	5	circRNA	ENSSSCT00000004500	3,4,5,6,7	1:12354127-12361986|1:12376129-12381441
chr1	12381441	12388087	+	3	circRNA	ENSSSCT00000004500	8,9,10	1:12376129-12381441|1:12388087-12391905
chr1	13723160	13834646	+	4	circRNA	ENSSSCT00000030512	2,3,4,5	1:13715895-13723160|1:13834646-13841700
chr1	14165761	14167020	+	2	circRNA	ENSSSCT00000004511	3,4	1:14156538-14165761|1:14167020-14171665
chr1	14373972	14374308	-	1	circRNA	ENSSSCT00000035147	5	1:14296077-14373972|1:14374308-14416334
chr1	14373972	14416451	-	2	circRNA	ENSSSCT00000035147	5,4	1:14296077-14373972|1:14416451-14456952
chr1	14416334	14457143	-	2	circRNA	ENSSSCT00000035147	4,3	1:14374308-14416334|1:14457143-14490713
chr1	14674474	14678459	-	2	circRNA	ENSSSCT00000041158	7,6	1:14662345-14674474|1:14678459-14684255
chr1	16255229	16256925	+	2	circRNA	ENSSSCT00000052785	4,5	1:16253319-16255229|1:16256925-16258379
chr1	16307507	16307993	+	2	circRNA	ENSSSCT00000004541	6,7	1:16304307-16307507|1:16307993-16316807
chr1	16335744	16337886	+	2	circRNA	ENSSSCT00000004539	2,3	1:16331173-16335744|1:16337886-16341533
chr1	16335744	16356103	+	6	circRNA	ENSSSCT00000004539	2,3,4,5,6,7	1:16331173-16335744|1:16356103-16357013
chr1	16366074	16371076	-	4	circRNA	ENSSSCT00000031837	7,6,5,4	1:16363158-16366074|1:16371076-16374088
chr1	16370924	16374414	-	3	circRNA	ENSSSCT00000031837	4,3,2	1:16369805-16370924|1:16374414-16381697
chr1	16406040	16420284	+	9	circRNA	ENSSSCT00000024741	2,3,4,5,6,7,8,9,10	1:16401087-16406040|1:16420284-16423842
chr1	16558807	16566086	-	2	circRNA	ENSSSCT00000038147	4,3	1:16541051-16558807|1:16566086-16578991
chr1	17372567	17382520	-	2	circRNA	ENSSSCT00000059607	5,4	1:17347163-17372567|1:17382520-17386567
chr1	17372567	17386654	-	3	circRNA	ENSSSCT00000059607	5,4,3	1:17347163-17372567|1:17386654-17389891
chr1	17372567	17416764	-	6	circRNA	ENSSSCT00000042353	8,7,6,5,4,3	1:17347163-17372567|1:17416764-17463450
chr1	17372567	17463579	-	7	circRNA	ENSSSCT00000042353	8,7,6,5,4,3,2	1:17347163-17372567|1:17463579-17511528
chr1	18987937	19005183	-	6	circRNA	ENSSSCT00000004553	7,6,5,4,3,2	1:18978518-18987937|1:19005183-19029279
chr1	19688505	19689513	+	2	circRNA	ENSSSCT00000004555	27,28	1:19686971-19688505|1:19689513-19693305
chr1	20549776	20567142	-	4	circRNA	ENSSSCT00000061166	65,64,63,62	1:20543571-20549776|1:20567142-20571856
chr1	20549776	20617175	-	12	circRNA	ENSSSCT00000061166	65,64,63,62,61,60,59,58,57,56,55,54	1:20543571-20549776|1:20617175-20633121
chr1	20633121	20804689	-	13	circRNA	ENSSSCT00000061166	53,52,51,50,49,48,47,46,45,44,43,42,41	1:20617175-20633121|1:20804689-20813555
chr1	20757453	20858213	-	28	circRNA	ENSSSCT00000061166	50,49,48,47,46,45,44,43,42,41,40,39,38,37,36,35,34,33,32,31,30,29,28,27,26,25,24,23	1:20671055-20757453|1:20858213-20869921
chr1	20757453	20898786	-	41	circRNA	ENSSSCT00000061166	50,49,48,47,46,45,44,43,42,41,40,39,38,37,36,35,34,33,32,31,30,29,28,27,26,25,24,23,22,21,20,19,18,17,16,15,14,13,12,11,10	1:20671055-20757453|1:20898786-20899705
chr1	20776416	20798556	-	7	circRNA	ENSSSCT00000061166	49,48,47,46,45,44,43	1:20757643-20776416|1:20798556-20803182
chr1	20782262	20798556	-	5	circRNA	ENSSSCT00000061166	47,46,45,44,43	1:20778068-20782262|1:20798556-20803182
chr1	20803182	20804689	-	2	circRNA	ENSSSCT00000061166	42,41	1:20798556-20803182|1:20804689-20813555
chr1	20821001	20826456	-	3	circRNA	ENSSSCT00000061166	36,35,34	1:20819308-20821001|1:20826456-20832278
chr1	20841195	20910141	-	25	circRNA	ENSSSCT00000061166	31,30,29,28,27,26,25,24,23,22,21,20,19,18,17,16,15,14,13,12,11,10,9,8,7	1:20838893-20841195|1:20910141-20912943
chr1	20869921	20876823	-	5	circRNA	ENSSSCT00000061166	22,21,20,19,18	1:20858213-20869921|1:20876823-20880685
chr1	20880685	20888975	-	4	circRNA	ENSSSCT00000061166	17,16,15,14	1:20876823-20880685|1:20888975-20893797
chr1	20908951	20913116	-	3	circRNA	ENSSSCT00000061166	8,7,6	1:20899909-20908951|1:20913116-20915108
chr1	20908951	20917634	-	6	circRNA	ENSSSCT00000061166	8,7,6,5,4,3	1:20899909-20908951|1:20917634-20935346
chr1	21779718	21781094	-	4	circRNA	ENSSSCT00000046873	8,7,6,5	1:21777462-21779718|1:21781094-21782684
chr1	22687198	22695713	-	4	circRNA	ENSSSCT00000053391	20,19,18,17	1:22685795-22687198|1:22695713-22697936
chr1	22697936	22706363	-	7	circRNA	ENSSSCT00000053391	16,15,14,13,12,11,10	1:22695713-22697936|1:22706363-22710220
chr1	22719643	22735094	-	4	circRNA	ENSSSCT00000053391	6,5,4,3	1:22713341-22719643|1:22735094-22793278
chr1	22731267	22735094	-	2	circRNA	ENSSSCT00000053391	4,3	1:22722011-22731267|1:22735094-22793278
chr1	22880594	22901667	-	5	circRNA	ENSSSCT00000065783	6,5,4,3,2	1:22871847-22880594|1:22901667-22923666
chr1	25526209	25528664	+	4	circRNA	ENSSSCT00000033622	5,6,7,8	1:25525358-25526209|1:25528664-25540026
chr1	27450520	27478260	+	6	circRNA	ENSSSCT00000056666	2,3,4,5,6,7	1:27381285-27450520|1:27478260-27499705
chr1	27472675	27478260	+	4	circRNA	ENSSSCT00000056666	4,5,6,7	1:27465996-27472675|1:27478260-27499705
chr1	27589738	27597287	+	3	circRNA	ENSSSCT00000056666	26,27,28	1:27578400-27589738|1:27597287-27598951
chr1	27892403	27899982	+	2	circRNA	ENSSSCT00000058049	11,12	1:27891571-27892403|1:27899982-27900390
chr1	27966284	27975041	-	3	circRNA	ENSSSCT00000065157	12,11,10	1:27961974-27966284|1:27975041-27980658
chr1	28572082	28574012	+	2	circRNA	ENSSSCT00000004605	3,4	1:28566970-28572082|1:28574012-28586521
chr1	28982359	29027965	+	5	circRNA	ENSSSCT00000004608	4,5,6,7,8	1:28978796-28982359|1:29027965-29033572
chr1	29018350	29042644	+	10	circRNA	ENSSSCT00000004608	5,6,7,8,9,10,11,12,13,14	1:28982554-29018350|1:29042644-29046642
chr1	29027847	29042644	+	7	circRNA	ENSSSCT00000004608	8,9,10,11,12,13,14	1:29024428-29027847|1:29042644-29046642
chr1	29027847	29046743	+	8	circRNA	ENSSSCT00000004608	8,9,10,11,12,13,14,15	1:29024428-29027847|1:29046743-29048707
chr1	31971720	31991763	+	13	circRNA	ENSSSCT00000004637	10,11,12,13,14,15,16,17,18,19,20,21,22	1:31970205-31971720|1:31991763-31993648
chr1	31980771	31982095	+	2	circRNA	ENSSSCT00000004637	13,14	1:31979658-31980771|1:31982095-31984461
chr1	31980771	31984604	+	3	circRNA	ENSSSCT00000004637	13,14,15	1:31979658-31980771|1:31984604-31985847
chr1	31980771	31991763	+	10	circRNA	ENSSSCT00000004637	13,14,15,16,17,18,19,20,21,22	1:31979658-31980771|1:31991763-31993648
chr1	32520012	32522430	+	2	circRNA	ENSSSCT00000043663	2,3	1:32418398-32520012|1:32522430-32552781
chr1	33217619	33315782	-	18	circRNA	ENSSSCT00000065993	19,18,17,16,15,14,13,12,11,10,9,8,7,6,5,4,3,2	1:33205015-33217619|1:33315782-33317315
chr1	33271333	33278592	-	4	circRNA	ENSSSCT00000065993	12,11,10,9	1:33260042-33271333|1:33278592-33280749
chr1	33280749	33284458	-	3	circRNA	ENSSSCT00000065993	8,7,6	1:33278592-33280749|1:33284458-33286070
chr1	33651341	33695033	+	10	circRNA	ENSSSCT00000047609	2,3,4,5,6,7,8,9,10,11	1:33528217-33651341|1:33695033-33695979
chr1	33651341	33696120	+	11	circRNA	ENSSSCT00000047609	2,3,4,5,6,7,8,9,10,11,12	1:33528217-33651341|1:33696120-33710369
chr1	33664668	33681370	+	4	circRNA	ENSSSCT00000047609	5,6,7,8	1:33659868-33664668|1:33681370-33685343
chr1	33672927	33676063	+	2	circRNA	ENSSSCT00000047609	6,7	1:33664847-33672927|1:33676063-33681292
chr1	33672927	33681370	+	3	circRNA	ENSSSCT00000047609	6,7,8	1:33664847-33672927|1:33681370-33685343
chr1	33672927	33685503	+	4	circRNA	ENSSSCT00000047609	6,7,8,9	1:33664847-33672927|1:33685503-33688450
chr1	33672927	33688533	+	5	circRNA	ENSSSCT00000047609	6,7,8,9,10	1:33664847-33672927|1:33688533-33694826
chr1	33672927	33696120	+	7	circRNA	ENSSSCT00000047609	6,7,8,9,10,11,12	1:33664847-33672927|1:33696120-33710369
chr1	33672927	33710494	+	8	circRNA	ENSSSCT00000047609	6,7,8,9,10,11,12,13	1:33664847-33672927|1:33710494-33714963
chr1	33675971	33688533	+	4	circRNA	ENSSSCT00000047609	7,8,9,10	1:33673093-33675971|1:33688533-33694826
chr1	33884805	33901143	-	3	circRNA	ENSSSCT00000048337	36,35,34	1:33879510-33884805|1:33901143-33915730
chr1	34896731	34976153	+	3	circRNA	ENSSSCT00000038851	3,4,5	1:34821008-34896731|1:34976153-35005531
chr1	34896731	35034972	+	5	circRNA	ENSSSCT00000038851	3,4,5,6,7	1:34821008-34896731|1:35034972-35131946
chr1	34973378	35034972	+	4	circRNA	ENSSSCT00000038851	4,5,6,7	1:34897003-34973378|1:35034972-35131946
chr1	34973378	35158957	+	10	circRNA	ENSSSCT00000038851	4,5,6,7,8,9,10,11,12,13	1:34897003-34973378|1:35158957-35208261
chr1	35005531	35034972	+	2	circRNA	ENSSSCT00000038851	6,7	1:34976153-35005531|1:35034972-35131946
chr1	35034678	35034972	+	1	circRNA	ENSSSCT00000038851	7	1:35005706-35034678|1:35034972-35131946
chr1	35131946	35145478	+	4	circRNA	ENSSSCT00000038851	8,9,10,11	1:35034972-35131946|1:35145478-35155357
chr1	35131946	35158957	+	6	circRNA	ENSSSCT00000038851	8,9,10,11,12,13	1:35034972-35131946|1:35158957-35208261
chr1	35131946	35216500	+	9	circRNA	ENSSSCT00000038851	8,9,10,11,12,13,14,15,16	1:35034972-35131946|1:35216500-35218567
chr1	35138979	35158957	+	5	circRNA	ENSSSCT00000038851	9,10,11,12,13	1:35132249-35138979|1:35158957-35208261
chr1	36964150	36978525	-	6	circRNA	ENSSSCT00000004665	13,12,11,10,9,8	1:36940902-36964150|1:36978525-36985760
chr1	36964150	36994867	-	11	circRNA	ENSSSCT00000051154	12,11,10,9,8,7,6,5,4,3,2	1:36940902-36964150|1:36994867-37001933
chr1	36985760	36994867	-	6	circRNA	ENSSSCT00000051154	7,6,5,4,3,2	1:36977054-36985760|1:36994867-37001933
chr1	36986916	36987551	-	3	circRNA	ENSSSCT00000045517	5,4,3	1:36985917-36986916|1:36987551-36991398
chr1	36986916	36994867	-	5	circRNA	ENSSSCT00000051154	6,5,4,3,2	1:36985917-36986916|1:36994867-37001933
chr1	37122168	37182851	-	3	circRNA	ENSSSCT00000027938	5,4,3	1:37106913-37122168|1:37182851-37193555
chr1	40116744	40119904	+	2	circRNA	ENSSSCT00000059055	2,3	1:40099487-40116744|1:40119904-40132190
chr1	40134575	40137899	+	5	circRNA	ENSSSCT00000004682	6,7,8,9,10	1:40132630-40134575|1:40137899-40139909
chr1	40157757	40164224	-	5	circRNA	ENSSSCT00000004683	9,8,7,6,5	1:40156813-40157757|1:40164224-40166596
chr1	41076031	41095392	+	3	circRNA	ENSSSCT00000060707	3,4,5	1:41058262-41076031|1:41095392-41097712
chr1	41095323	41149254	+	15	circRNA	ENSSSCT00000060707	5,6,7,8,9,10,11,12,13,14,15,16,17,18,19	1:41083592-41095323|1:41149254-41156311
chr1	41144281	41149254	+	3	circRNA	ENSSSCT00000060707	17,18,19	1:41125601-41144281|1:41149254-41156311
chr1	41144281	41164096	+	5	circRNA	ENSSSCT00000060707	17,18,19,20,21	1:41125601-41144281|1:41164096-41177343
chr1	41144281	41177466	+	6	circRNA	ENSSSCT00000060707	17,18,19,20,21,22	1:41125601-41144281|1:41177466-41178747
chr1	41144281	41180922	+	8	circRNA	ENSSSCT00000060707	17,18,19,20,21,22,23,24	1:41125601-41144281|1:41180922-41199751
chr1	41199751	41230402	+	6	circRNA	ENSSSCT00000060707	25,26,27,28,29,30	1:41180922-41199751|1:41230402-41247777
chr1	41199751	41247966	+	7	circRNA	ENSSSCT00000060707	25,26,27,28,29,30,31	1:41180922-41199751|1:41247966-41261738
chr1	41219695	41230402	+	4	circRNA	ENSSSCT00000060707	27,28,29,30	1:41207401-41219695|1:41230402-41247777
chr1	42730227	42787786	+	4	circRNA	ENSSSCT00000047113	2,3,4,5	1:42730018-42730227|1:42787786-42824702
chr1	44163929	44171097	-	3	circRNA	ENSSSCT00000030561	4,3,2	1:44159541-44163929|1:44171097-44185594
chr1	44264933	44279238	+	7	circRNA	ENSSSCT00000059612	2,3,4,5,6,7,8	1:44239894-44264933|1:44279238-44282595
chr1	44270419	44276727	+	4	circRNA	ENSSSCT00000059612	4,5,6,7	1:44266493-44270419|1:44276727-44279057
chr1	44305882	44329819	-	12	circRNA	ENSSSCT00000004702	14,13,12,11,10,9,8,7,6,5,4,3	1:44303165-44305882|1:44329819-44350059
chr1	44307396	44309527	-	3	circRNA	ENSSSCT00000004702	12,11,10	1:44306881-44307396|1:44309527-44310050
chr1	44323600	44350272	-	4	circRNA	ENSSSCT00000004702	5,4,3,2	1:44317084-44323600|1:44350272-44373482
chr1	44928512	44935340	-	5	circRNA	ENSSSCT00000004711	6,5,4,3,2	1:44926427-44928512|1:44935340-44938669
chr1	45173523	45175282	+	2	circRNA	ENSSSCT00000050791	2,3	1:45144725-45173523|1:45175282-45175712
chr1	45173523	45175843	+	3	circRNA	ENSSSCT00000050791	2,3,4	1:45144725-45173523|1:45175843-45177361
chr1	45173523	45177436	+	4	circRNA	ENSSSCT00000050791	2,3,4,5	1:45144725-45173523|1:45177436-45178346
chr1	45175189	45175843	+	2	circRNA	ENSSSCT00000050791	3,4	1:45174073-45175189|1:45175843-45177361
chr1	49916144	49932071	-	4	circRNA	ENSSSCT00000004721	9,8,7,6	1:49915472-49916144|1:49932071-49941855
chr1	50832069	50838859	+	2	circRNA	ENSSSCT00000004726	2,3	1:50781923-50832069|1:50838859-50847220
chr1	50832069	50870956	+	4	circRNA	ENSSSCT00000052276	3,4,5,6	1:50729977-50832069|1:50870956-50913845
chr1	50870875	50933259	+	3	circRNA	ENSSSCT00000052276	6,7,8	1:50857783-50870875|1:50933259-50937893
chr1	52035720	52179177	+	23	circRNA	ENSSSCT00000004730	5,6,7,8,9,10,11,12,13,14,15,16,17,18,19,20,21,22,23,24,25,26,27	1:51990222-52035720|1:52179177-52235413
chr1	52123107	52152735	+	5	circRNA	ENSSSCT00000004730	22,23,24,25,26	1:52113729-52123107|1:52152735-52178941
chr1	52123107	52179177	+	6	circRNA	ENSSSCT00000004730	22,23,24,25,26,27	1:52113729-52123107|1:52179177-52235413
chr1	52130361	52152735	+	3	circRNA	ENSSSCT00000004730	24,25,26	1:52129294-52130361|1:52152735-52178941
chr1	52130361	52179177	+	4	circRNA	ENSSSCT00000004730	24,25,26,27	1:52129294-52130361|1:52179177-52235413
chr1	52134345	52179177	+	4	circRNA	ENSSSCT00000063919	2,3,4,5	1:52130474-52134345|1:52179177-52235413
chr1	52146556	52152735	+	2	circRNA	ENSSSCT00000004730	25,26	1:52130474-52146556|1:52152735-52178941
chr1	52146556	52179177	+	3	circRNA	ENSSSCT00000004730	25,26,27	1:52130474-52146556|1:52179177-52235413
chr1	53152425	53157947	+	4	circRNA	ENSSSCT00000023321	7,8,9,10	1:53150034-53152425|1:53157947-53171873
chr1	53378682	53388118	-	6	circRNA	ENSSSCT00000004742	19,18,17,16,15,14	1:53377235-53378682|1:53388118-53396206
chr1	53382543	53388118	-	5	circRNA	ENSSSCT00000004742	18,17,16,15,14	1:53378809-53382543|1:53388118-53396206
chr1	53382543	53440883	-	17	circRNA	ENSSSCT00000004742	18,17,16,15,14,13,12,11,10,9,8,7,6,5,4,3,2	1:53378809-53382543|1:53440883-53442146
chr1	53396206	53413955	-	7	circRNA	ENSSSCT00000004742	13,12,11,10,9,8,7	1:53388118-53396206|1:53413955-53419652
chr1	53396206	53440883	-	12	circRNA	ENSSSCT00000004742	13,12,11,10,9,8,7,6,5,4,3,2	1:53388118-53396206|1:53440883-53442146
chr1	53397626	53397909	-	1	circRNA	ENSSSCT00000004742	12	1:53396468-53397626|1:53397909-53401860
chr1	53397626	53413955	-	6	circRNA	ENSSSCT00000004742	12,11,10,9,8,7	1:53396468-53397626|1:53413955-53419652
chr1	53401860	53422321	-	8	circRNA	ENSSSCT00000004742	11,10,9,8,7,6,5,4	1:53397909-53401860|1:53422321-53425215
chr1	53409337	53413955	-	3	circRNA	ENSSSCT00000004742	9,8,7	1:53402802-53409337|1:53413955-53419652
chr1	53409337	53422321	-	6	circRNA	ENSSSCT00000004742	9,8,7,6,5,4	1:53402802-53409337|1:53422321-53425215
chr1	53409337	53425327	-	7	circRNA	ENSSSCT00000004742	9,8,7,6,5,4,3	1:53402802-53409337|1:53425327-53440767
chr1	53419652	53422321	-	3	circRNA	ENSSSCT00000004742	6,5,4	1:53413955-53419652|1:53422321-53425215
chr1	53419652	53425327	-	4	circRNA	ENSSSCT00000004742	6,5,4,3	1:53413955-53419652|1:53425327-53440767
chr1	54461975	54469709	-	7	circRNA	ENSSSCT00000004747	28,27,26,25,24,23,22	1:54460853-54461975|1:54469709-54472560
chr1	54461975	54494313	-	13	circRNA	ENSSSCT00000004747	28,27,26,25,24,23,22,21,20,19,18,17,16	1:54460853-54461975|1:54494313-54501585
chr1	54461975	54529700	-	26	circRNA	ENSSSCT00000004747	28,27,26,25,24,23,22,21,20,19,18,17,16,15,14,13,12,11,10,9,8,7,6,5,4,3	1:54460853-54461975|1:54529700-54546887
chr1	54465939	54509899	-	17	circRNA	ENSSSCT00000004747	25,24,23,22,21,20,19,18,17,16,15,14,13,12,11,10,9	1:54465760-54465939|1:54509899-54511230
chr1	54477710	54511387	-	12	circRNA	ENSSSCT00000004747	19,18,17,16,15,14,13,12,11,10,9,8	1:54475021-54477710|1:54511387-54515829
chr1	54494180	54502778	-	4	circRNA	ENSSSCT00000004747	16,15,14,13	1:54487486-54494180|1:54502778-54508646
chr1	54576237	54576836	-	2	circRNA	ENSSSCT00000055678	10,9	1:54570227-54576237|1:54576836-54579230
chr1	54576237	54581212	-	4	circRNA	ENSSSCT00000055678	10,9,8,7	1:54570227-54576237|1:54581212-54592121
chr1	55666251	55669095	+	3	circRNA	ENSSSCT00000065061	3,4,5	1:55618726-55666251|1:55669095-55684667
chr1	55906697	55908943	-	3	circRNA	ENSSSCT00000004760	20,19,18	1:55893868-55906697|1:55908943-55910138
chr1	55937065	55954186	-	6	circRNA	ENSSSCT00000004760	8,7,6,5,4,3	1:55920284-55937065|1:55954186-55962379
chr1	56001861	56034992	+	8	circRNA	ENSSSCT00000037698	11,12,13,14,15,16,17,18	1:56000362-56001861|1:56034992-56039108
chr1	56901360	56979996	-	4	circRNA	ENSSSCT00000058496	14,13,12,11	1:56857180-56901360|1:56979996-56987429
chr1	56960509	56998082	-	4	circRNA	ENSSSCT00000058496	12,11,10,9	1:56941540-56960509|1:56998082-57030071
chr1	56960509	57031666	-	6	circRNA	ENSSSCT00000058496	12,11,10,9,8,7	1:56941540-56960509|1:57031666-57037141
chr1	56960509	57037382	-	7	circRNA	ENSSSCT00000058496	12,11,10,9,8,7,6	1:56941540-56960509|1:57037382-57038813
chr1	56987429	57037382	-	5	circRNA	ENSSSCT00000058496	10,9,8,7,6	1:56979996-56987429|1:57037382-57038813
chr1	57385548	57393736	-	4	circRNA	ENSSSCT00000054872	6,5,4,3	1:57376996-57385548|1:57393736-57401925
chr1	57392228	57393736	-	2	circRNA	ENSSSCT00000054872	4,3	1:57391008-57392228|1:57393736-57401925
chr1	57702834	57704684	-	3	circRNA	ENSSSCT00000004784	71,70,69	1:57702235-57702834|1:57704684-57704970
chr1	57782426	57785737	-	3	circRNA	ENSSSCT00000004784	14,13,12	1:57780937-57782426|1:57785737-57788271
chr1	57782426	57788353	-	4	circRNA	ENSSSCT00000004784	14,13,12,11	1:57780937-57782426|1:57788353-57790165
chr1	57788271	57796014	-	4	circRNA	ENSSSCT00000004784	11,10,9,8	1:57785737-57788271|1:57796014-57800377
chr1	57800377	57800994	-	2	circRNA	ENSSSCT00000004784	7,6	1:57796014-57800377|1:57800994-57804173
chr1	57845046	57850879	+	5	circRNA	ENSSSCT00000004783	3,4,5,6,7	1:57835241-57845046|1:57850879-57853588
chr1	57848454	57850879	+	3	circRNA	ENSSSCT00000004783	5,6,7	1:57846600-57848454|1:57850879-57853588
chr1	58519671	58523658	-	3	circRNA	ENSSSCT00000004790	9,8,7	1:58516704-58519671|1:58523658-58526050
chr1	65879715	65911662	-	4	circRNA	ENSSSCT00000042969	6,5,4,3	1:65875634-65879715|1:65911662-65919747
chr1	65919747	65921100	-	1	circRNA	ENSSSCT00000042969	2	1:65911662-65919747|1:65921100-65935540
chr1	66353975	66356192	-	3	circRNA	ENSSSCT00000028650	11,10,9	1:66352652-66353975|1:66356192-66358762
chr1	66356092	66364270	-	4	circRNA	ENSSSCT00000028650	9,8,7,6	1:66355377-66356092|1:66364270-66365706
chr1	66358762	66360969	-	2	circRNA	ENSSSCT00000028650	8,7	1:66356192-66358762|1:66360969-66364098
chr1	66395162	66445570	-	14	circRNA	ENSSSCT00000004808	16,15,14,13,12,11,10,9,8,7,6,5,4,3	1:66392880-66395162|1:66445570-66449678
chr1	66487804	66492995	-	4	circRNA	ENSSSCT00000037177	5,4,3,2	1:66484136-66487804|1:66492995-66498886
chr1	67450987	67455592	-	3	circRNA	ENSSSCT00000058812	23,22,21	1:67449634-67450987|1:67455592-67459173
chr1	67549096	67578266	-	5	circRNA	ENSSSCT00000058812	10,9,8,7,6	1:67523701-67549096|1:67578266-67584087
chr1	67576478	67578266	-	3	circRNA	ENSSSCT00000058812	8,7,6	1:67550055-67576478|1:67578266-67584087
chr1	71002779	71039726	-	11	circRNA	ENSSSCT00000004823	22,21,20,19,18,17,16,15,14,13,12	1:70995671-71002779|1:71039726-71047090
chr1	71059256	71082722	-	3	circRNA	ENSSSCT00000004823	7,6,5	1:71055262-71059256|1:71082722-71089793
chr1	72706052	72717959	+	5	circRNA	ENSSSCT00000004832	4,5,6,7,8	1:72701115-72706052|1:72717959-72733010
chr1	72706052	72738156	+	10	circRNA	ENSSSCT00000004832	4,5,6,7,8,9,10,11,12,13	1:72701115-72706052|1:72738156-72747394
chr1	72712126	72717959	+	4	circRNA	ENSSSCT00000004832	5,6,7,8	1:72708342-72712126|1:72717959-72733010
chr1	72712126	72738156	+	9	circRNA	ENSSSCT00000004832	5,6,7,8,9,10,11,12,13	1:72708342-72712126|1:72738156-72747394
chr1	72733010	72738156	+	5	circRNA	ENSSSCT00000004832	9,10,11,12,13	1:72717959-72733010|1:72738156-72747394
chr1	72737791	72738156	+	2	circRNA	ENSSSCT00000004832	12,13	1:72736593-72737791|1:72738156-72747394
chr1	72822493	72828469	+	3	circRNA	ENSSSCT00000041310	2,3,4	1:72815754-72822493|1:72828469-72832962
chr1	74028417	74030320	-	3	circRNA	ENSSSCT00000004844	13,12,11	1:74026093-74028417|1:74030320-74032450
chr1	74028417	74035454	-	6	circRNA	ENSSSCT00000004844	13,12,11,10,9,8	1:74026093-74028417|1:74035454-74037115
chr1	74043727	74052367	-	3	circRNA	ENSSSCT00000004844	4,3,2	1:74039636-74043727|1:74052367-74078285
chr1	74045954	74052367	-	2	circRNA	ENSSSCT00000004844	3,2	1:74043840-74045954|1:74052367-74078285
chr1	74404667	74420651	+	2	circRNA	ENSSSCT00000046117	2,3	1:74367775-74404667|1:74420651-74428873
chr1	74428873	74440246	+	3	circRNA	ENSSSCT00000046117	4,5,6	1:74420651-74428873|1:74440246-74467915
chr1	74503237	74545066	+	3	circRNA	ENSSSCT00000046117	8,9,10	1:74467974-74503237|1:74545066-74579167
chr1	74737036	74738472	+	1	circRNA	ENSSSCT00000038875	3	1:74630312-74737036|1:74738472-74755424
chr1	75718075	75731720	+	4	circRNA	ENSSSCT00000031596	2,3,4,5	1:75694009-75718075|1:75731720-75739121
chr1	75718075	75739270	+	5	circRNA	ENSSSCT00000031596	2,3,4,5,6	1:75694009-75718075|1:75739270-75742939
chr1	75753868	75759232	+	5	circRNA	ENSSSCT00000031596	11,12,13,14,15	1:75748294-75753868|1:75759232-75774620
chr1	76215148	76223008	+	6	circRNA	ENSSSCT00000004866	7,8,9,10,11,12	1:76213861-76215148|1:76223008-76223494
chr1	76222892	76223628	+	2	circRNA	ENSSSCT00000004866	12,13	1:76221658-76222892|1:76223628-76229371
chr1	76649381	76651641	-	2	circRNA	ENSSSCT00000057673	4,3	1:76625087-76649381|1:76651641-76723119
chr1	76723119	76727151	-	2	circRNA	ENSSSCT00000059751	3,2	1:76651641-76723119|1:76727151-76750225
chr1	76723119	76750287	-	3	circRNA	ENSSSCT00000059751	3,2,1	1:76651641-76723119|None
chr1	76920941	76929512	+	3	circRNA	ENSSSCT00000043824	2,3,4	1:76917296-76920941|1:76929512-76936103
chr1	76920941	76936185	+	4	circRNA	ENSSSCT00000043824	2,3,4,5	1:76917296-76920941|1:76936185-76937283
chr1	77086748	77087208	+	1	circRNA	ENSSSCT00000022616	4	1:77080270-77086748|1:77087208-77116126
chr1	77215897	77279692	-	14	circRNA	ENSSSCT00000026193	27,26,25,24,23,22,21,20,19,18,17,16,15,14	1:77208585-77215897|1:77279692-77284221
chr1	77234824	77236972	-	2	circRNA	ENSSSCT00000026193	25,24	1:77222815-77234824|1:77236972-77239633
chr1	77239633	77270404	-	7	circRNA	ENSSSCT00000026193	23,22,21,20,19,18,17	1:77236972-77239633|1:77270404-77275199
chr1	77263698	77270404	-	4	circRNA	ENSSSCT00000026193	20,19,18,17	1:77254176-77263698|1:77270404-77275199
chr1	77263698	77302848	-	11	circRNA	ENSSSCT00000026193	20,19,18,17,16,15,14,13,12,11,10	1:77254176-77263698|1:77302848-77311240
chr1	77270211	77276787	-	3	circRNA	ENSSSCT00000026193	17,16,15	1:77268785-77270211|1:77276787-77278778
chr1	77302728	77394243	-	11	circRNA	ENSSSCT00000046763	11,10,9,8,7,6,5,4,3,2,1	1:77299273-77302728|None
chr1	78080586	78083345	-	3	circRNA	ENSSSCT00000004890	36,35,34	1:78078603-78080586|1:78083345-78084846
chr1	78109182	78149434	-	12	circRNA	ENSSSCT00000004890	18,17,16,15,14,13,12,11,10,9,8,7	1:78106811-78109182|1:78149434-78151608
chr1	79879035	79879318	-	2	circRNA	ENSSSCT00000004897	8,7	1:79874476-79879035|1:79879318-79882323
chr1	82022944	82023413	+	1	circRNA	ENSSSCT00000004906	2	1:81997318-82022944|1:82023413-82050451
chr1	83059591	83085263	-	13	circRNA	ENSSSCT00000046795	21,20,19,18,17,16,15,14,13,12,11,10,9	1:83058047-83059591|1:83085263-83086190
chr1	83061355	83063345	-	1	circRNA	ENSSSCT00000046795	19	1:83059994-83061355|1:83063345-83065191
chr1	84000859	84007243	+	3	circRNA	ENSSSCT00000004926	9,10,11	1:83998813-84000859|1:84007243-84008638
chr1	85926480	85964180	-	5	circRNA	ENSSSCT00000004932	8,7,6,5,4	1:85830636-85926480|1:85964180-86002182
chr1	85961742	85964180	-	3	circRNA	ENSSSCT00000004932	6,5,4	1:85935975-85961742|1:85964180-86002182
chr1	86085545	86099977	-	6	circRNA	ENSSSCT00000004933	19,18,17,16,15,14	1:86082409-86085545|1:86099977-86101603
chr1	86098772	86101740	-	3	circRNA	ENSSSCT00000004933	15,14,13	1:86089721-86098772|1:86101740-86107112
chr1	87134226	87153004	+	3	circRNA	ENSSSCT00000004941	5,6,7	1:87117836-87134226|1:87153004-87169273
chr1	87177831	87178553	+	2	circRNA	ENSSSCT00000004941	14,15	1:87176752-87177831|1:87178553-87191048
chr1	87192386	87201468	+	4	circRNA	ENSSSCT00000004941	17,18,19,20	1:87191177-87192386|1:87201468-87206855
chr1	87210272	87212987	+	2	circRNA	ENSSSCT00000004941	22,23	1:87206996-87210272|1:87212987-87215463
chr1	87218023	87218361	+	2	circRNA	ENSSSCT00000004941	26,27	1:87217322-87218023|1:87218361-87220674
chr1	87225157	87237408	+	8	circRNA	ENSSSCT00000004941	31,32,33,34,35,36,37,38	1:87223895-87225157|1:87237408-87237939
chr1	90023733	90035887	-	5	circRNA	ENSSSCT00000004948	21,20,19,18,17	1:90021094-90023733|1:90035887-90036439
chr1	90029808	90040011	-	5	circRNA	ENSSSCT00000004948	19,18,17,16,15	1:90024027-90029808|1:90040011-90041606
chr1	90032152	90041679	-	5	circRNA	ENSSSCT00000004948	18,17,16,15,14	1:90029902-90032152|1:90041679-90044418
chr1	90035713	90046759	-	7	circRNA	ENSSSCT00000004948	17,16,15,14,13,12,11	1:90032191-90035713|1:90046759-90053259
chr1	90172371	90193314	-	7	circRNA	ENSSSCT00000037375	20,19,18,17,16,15,14	1:90170618-90172371|1:90193314-90194921
chr1	90220787	90269663	-	6	circRNA	ENSSSCT00000037375	7,6,5,4,3,2	1:90210228-90220787|1:90269663-90299730
chr1	90254629	90255853	-	2	circRNA	ENSSSCT00000037375	5,4	1:90238411-90254629|1:90255853-90267690
chr1	90816716	90819974	+	4	circRNA	ENSSSCT00000004955	32,33,34,35	1:90812587-90816716|1:90819974-90821146
chr1	92422666	92424540	+	6	circRNA	ENSSSCT00000037617	2,3,4,5,6,7	1:92421499-92422666|1:92424540-92424640
chr1	92424761	92424882	+	1	ciRNA	ENSSSCT00000060502	9	1:92424761-92472781
chr1	94557867	94561324	+	1	circRNA	ENSSSCT00000004961	3	1:94486362-94557867|1:94561324-94636515
chr1	95513002	95536688	-	12	circRNA	ENSSSCT00000027237	38,37,36,35,34,33,32,31,30,29,28,27	1:95505732-95513002|1:95536688-95543321
chr1	95743459	95744239	-	3	circRNA	ENSSSCT00000047779	6,5,4	1:95742917-95743459|1:95744239-95746975
chr1	95744065	95748901	-	3	circRNA	ENSSSCT00000047779	4,3,2	1:95743977-95744065|1:95748901-95749406
chr1	95764253	95766334	+	2	circRNA	ENSSSCT00000054092	2,3	1:95757393-95764253|1:95766334-95767915
chr1	95764253	95770215	+	6	circRNA	ENSSSCT00000054092	2,3,4,5,6,7	1:95757393-95764253|1:95770215-95774003
chr1	95846714	95847499	+	1	circRNA	ENSSSCT00000060349	2	1:95808877-95846714|1:95847499-95881085
chr1	96202876	96205587	-	4	circRNA	ENSSSCT00000032272	12,11,10,9	1:96193680-96202876|1:96205587-96216442
chr1	96447976	96493470	-	10	circRNA	ENSSSCT00000038005	13,12,11,10,9,8,7,6,5,4	1:96445377-96447976|1:96493470-96507477
chr1	96472569	96516009	-	8	circRNA	ENSSSCT00000038005	9,8,7,6,5,4,3,2	1:96465249-96472569|1:96516009-96545580
chr1	97447507	97451864	-	4	circRNA	ENSSSCT00000045010	7,6,5,4	1:97433941-97447507|1:97451864-97483986
chr1	98354266	98358280	+	2	circRNA	ENSSSCT00000064712	8,9	1:98310046-98354266|1:98358280-98409332
chr1	98708818	98725770	-	2	circRNA	ENSSSCT00000004980	16,15	1:98643296-98708818|1:98725770-98776931
chr1	98860450	98888929	-	5	circRNA	ENSSSCT00000004980	13,12,11,10,9	1:98777034-98860450|1:98888929-98929604
chr1	98860450	98931423	-	7	circRNA	ENSSSCT00000004980	13,12,11,10,9,8,7	1:98777034-98860450|1:98931423-98951835
chr1	98929604	98973843	-	6	circRNA	ENSSSCT00000004980	8,7,6,5,4,3	1:98888929-98929604|1:98973843-99000896
chr1	99504017	99505136	-	2	circRNA	ENSSSCT00000004983	16,15	1:99497594-99504017|1:99505136-99516459
chr1	99612927	99617351	-	2	circRNA	ENSSSCT00000004983	4,3	1:99569000-99612927|1:99617351-99635424
chr1	99895471	99896370	-	2	circRNA	ENSSSCT00000052786	17,16	1:99881810-99895471|1:99896370-99898640
chr1	100589849	100597672	+	4	circRNA	ENSSSCT00000004997	3,4,5,6	1:100521975-100589849|1:100597672-100601422
chr1	100589849	100603238	+	7	circRNA	ENSSSCT00000004997	3,4,5,6,7,8,9	1:100521975-100589849|1:100603238-100611828
chr1	100589849	100613174	+	9	circRNA	ENSSSCT00000004997	3,4,5,6,7,8,9,10,11	1:100521975-100589849|1:100613174-100624854
chr1	100589849	100624993	+	10	circRNA	ENSSSCT00000004997	3,4,5,6,7,8,9,10,11,12	1:100521975-100589849|1:100624993-100626501
chr1	100592210	100603238	+	5	circRNA	ENSSSCT00000004997	5,6,7,8,9	1:100591490-100592210|1:100603238-100611828
chr1	100597459	100613174	+	6	circRNA	ENSSSCT00000004997	6,7,8,9,10,11	1:100592240-100597459|1:100613174-100624854
chr1	103695962	103697703	-	2	circRNA	ENSSSCT00000005002	5,4	1:103690587-103695962|1:103697703-103719769
chr1	103802718	103808752	+	3	circRNA	ENSSSCT00000005003	3,4,5	1:103798352-103802718|1:103808752-103810091
chr1	104748095	104754395	-	3	circRNA	ENSSSCT00000053584	8,7,6	1:104726572-104748095|1:104754395-104756083
chr1	104748095	104846273	-	9	circRNA	ENSSSCT00000046813	10,9,8,7,6,5,4,3,2	1:104726572-104748095|1:104846273-104894795
chr1	104764628	104774676	-	3	circRNA	ENSSSCT00000053584	4,3,2	1:104756151-104764628|1:104774676-104816326
chr1	104845582	104955089	-	5	circRNA	ENSSSCT00000042622	7,6,5,4,3	1:104774676-104845582|1:104955089-105075336
chr1	105985061	106000228	-	5	circRNA	ENSSSCT00000038773	6,5,4,3,2	1:105975341-105985061|1:106000228-106013051
chr1	106114309	106171073	+	6	circRNA	ENSSSCT00000039131	13,14,15,16,17,18	1:106091861-106114309|1:106171073-106203113
chr1	106148089	106150609	+	2	circRNA	ENSSSCT00000039131	15,16	1:106125149-106148089|1:106150609-106167649
chr1	106150520	106171073	+	3	circRNA	ENSSSCT00000039131	16,17,18	1:106148859-106150520|1:106171073-106203113
chr1	106314172	106317699	+	3	circRNA	ENSSSCT00000039131	22,23,24	1:106302418-106314172|1:106317699-106339267
chr1	106913170	106917338	-	4	circRNA	ENSSSCT00000064163	15,14,13,12	1:106912396-106913170|1:106917338-106917576
chr1	106916177	106924847	-	10	circRNA	ENSSSCT00000064163	13,12,11,10,9,8,7,6,5,4	1:106913733-106916177|1:106924847-106926905
chr1	106923368	106924847	-	4	circRNA	ENSSSCT00000064163	7,6,5,4	1:106921879-106923368|1:106924847-106926905
chr1	106923368	106926988	-	5	circRNA	ENSSSCT00000064163	7,6,5,4,3	1:106921879-106923368|1:106926988-106928007
chr1	107015988	107025677	+	3	circRNA	ENSSSCT00000005019	2,3,4	1:107012066-107015988|1:107025677-107028043
chr1	107028043	107031624	+	3	circRNA	ENSSSCT00000005019	5,6,7	1:107025677-107028043|1:107031624-107034183
chr1	107028043	107034324	+	4	circRNA	ENSSSCT00000005019	5,6,7,8	1:107025677-107028043|1:107034324-107035675
chr1	107552364	107553238	-	1	circRNA	ENSSSCT00000040122	2	1:107415140-107552364|1:107553238-107579032
chr1	107630021	107639089	-	3	circRNA	ENSSSCT00000059350	7,6,5	1:107627156-107630021|1:107639089-107641310
chr1	107763495	107763896	+	1	circRNA	ENSSSCT00000063162	2	1:107690249-107763495|1:107763896-107798242
chr1	108248955	108249911	+	1	circRNA	ENSSSCT00000005038	2	1:108206339-108248955|1:108249911-108257594
chr1	108285314	108285727	+	2	circRNA	ENSSSCT00000005038	15,16	1:108281679-108285314|1:108285727-108287383
chr1	108326425	108336262	+	5	circRNA	ENSSSCT00000005038	32,33,34,35,36	1:108324022-108326425|1:108336262-108338379
chr1	108385211	108386218	+	2	circRNA	ENSSSCT00000005038	66,67	1:108384239-108385211|1:108386218-108387542
chr1	108447645	108486823	-	10	circRNA	ENSSSCT00000055085	11,10,9,8,7,6,5,4,3,2	1:108422437-108447645|1:108486823-108515197
chr1	108459470	108486823	-	7	circRNA	ENSSSCT00000055085	8,7,6,5,4,3,2	1:108451292-108459470|1:108486823-108515197
chr1	108482615	108486823	-	2	circRNA	ENSSSCT00000055085	3,2	1:108468465-108482615|1:108486823-108515197
chr1	109944955	109953251	+	4	circRNA	ENSSSCT00000061270	2,3,4,5	1:109931488-109944955|1:109953251-109957241
chr1	109966723	109975692	+	5	circRNA	ENSSSCT00000061270	8,9,10,11,12	1:109963162-109966723|1:109975692-109978083
chr1	109970585	109980151	+	7	circRNA	ENSSSCT00000061270	9,10,11,12,13,14,15	1:109966783-109970585|1:109980151-109984655
chr1	109970585	109985441	+	9	circRNA	ENSSSCT00000061270	9,10,11,12,13,14,15,16,17	1:109966783-109970585|1:109985441-109986573
chr1	109970585	109992482	+	13	circRNA	ENSSSCT00000061270	9,10,11,12,13,14,15,16,17,18,19,20,21	1:109966783-109970585|1:109992482-109994349
chr1	109970585	110008262	+	21	circRNA	ENSSSCT00000061270	9,10,11,12,13,14,15,16,17,18,19,20,21,22,23,24,25,26,27,28,29	1:109966783-109970585|1:110008262-110010238
chr1	109971463	109986716	+	9	circRNA	ENSSSCT00000061270	10,11,12,13,14,15,16,17,18	1:109970645-109971463|1:109986716-109987868
chr1	109985346	110083720	+	59	circRNA	ENSSSCT00000061270	17,18,19,20,21,22,23,24,25,26,27,28,29,30,31,32,33,34,35,36,37,38,39,40,41,42,43,44,45,46,47,48,49,50,51,52,53,54,55,56,57,58,59,60,61,62,63,64,65,66,67,68,69,70,71,72,73,74,75	1:109984785-109985346|1:110083720-110084532
chr1	110034205	110039341	+	3	circRNA	ENSSSCT00000061270	46,47,48	1:110033129-110034205|1:110039341-110041984
chr1	110034205	110042154	+	4	circRNA	ENSSSCT00000061270	46,47,48,49	1:110033129-110034205|1:110042154-110043813
chr1	110043813	110045873	+	2	circRNA	ENSSSCT00000061270	50,51	1:110042154-110043813|1:110045873-110048466
chr1	111454976	111471392	+	7	circRNA	ENSSSCT00000005055	3,4,5,6,7,8,9	1:111436915-111454976|1:111471392-111473178
chr1	111604491	111622652	+	3	circRNA	ENSSSCT00000046654	3,4,5	1:111600855-111604491|1:111622652-111626594
chr1	112774112	112786111	+	3	circRNA	ENSSSCT00000005066	2,3,4	1:112678189-112774112|1:112786111-112802692
chr1	112802692	112817568	+	5	circRNA	ENSSSCT00000005066	5,6,7,8,9	1:112786111-112802692|1:112817568-112823453
chr1	112802692	112836551	+	12	circRNA	ENSSSCT00000005066	5,6,7,8,9,10,11,12,13,14,15,16	1:112786111-112802692|1:112836551-112844125
chr1	112812139	112844232	+	11	circRNA	ENSSSCT00000005066	7,8,9,10,11,12,13,14,15,16,17	1:112806946-112812139|1:112844232-112850792
chr1	112815693	112823650	+	3	circRNA	ENSSSCT00000005066	8,9,10	1:112812271-112815693|1:112823650-112827598
chr1	112827598	112833528	+	5	circRNA	ENSSSCT00000005066	11,12,13,14,15	1:112823650-112827598|1:112833528-112836469
chr1	112862367	112885058	+	7	circRNA	ENSSSCT00000005066	20,21,22,23,24,25,26	1:112857543-112862367|1:112885058-112896140
chr1	112968879	112974578	-	3	circRNA	ENSSSCT00000005070	11,10,9	1:112967643-112968879|1:112974578-112976479
chr1	112973292	113013582	-	9	circRNA	ENSSSCT00000005070	10,9,8,7,6,5,4,3,2	1:112968972-112973292|1:113013582-113059205
chr1	112996634	113013582	-	2	circRNA	ENSSSCT00000005070	3,2	1:112991608-112996634|1:113013582-113059205
chr1	113012686	113013582	-	1	circRNA	ENSSSCT00000005070	2	1:112996761-113012686|1:113013582-113059205
chr1	113097706	113102025	+	3	circRNA	ENSSSCT00000005073	3,4,5	1:113086512-113097706|1:113102025-113108542
chr1	113097706	113131324	+	19	circRNA	ENSSSCT00000005073	3,4,5,6,7,8,9,10,11,12,13,14,15,16,17,18,19,20,21	1:113086512-113097706|1:113131324-113134306
chr1	113111065	113131324	+	15	circRNA	ENSSSCT00000005073	7,8,9,10,11,12,13,14,15,16,17,18,19,20,21	1:113108608-113111065|1:113131324-113134306
chr1	113115995	113131324	+	12	circRNA	ENSSSCT00000005073	10,11,12,13,14,15,16,17,18,19,20,21	1:113113585-113115995|1:113131324-113134306
chr1	113127999	113128579	+	2	circRNA	ENSSSCT00000005073	19,20	1:113126509-113127999|1:113128579-113131163
chr1	113362646	113377340	+	4	circRNA	ENSSSCT00000005076	4,5,6,7	1:113341290-113362646|1:113377340-113384923
chr1	114726980	114740195	-	5	circRNA	ENSSSCT00000061260	13,12,11,10,9	1:114718485-114726980|1:114740195-114772179
chr1	114737785	114740195	-	4	circRNA	ENSSSCT00000061260	12,11,10,9	1:114727059-114737785|1:114740195-114772179
chr1	115270672	115274463	+	2	circRNA	ENSSSCT00000028724	9,10	1:115263755-115270672|1:115274463-115275524
chr1	115283258	115292893	+	4	circRNA	ENSSSCT00000028724	13,14,15,16	1:115277011-115283258|1:115292893-115298584
chr1	115553444	115576329	-	3	circRNA	ENSSSCT00000005083	10,9,8	1:115527811-115553444|1:115576329-115579359
chr1	115553444	115585772	-	6	circRNA	ENSSSCT00000005083	10,9,8,7,6,5	1:115527811-115553444|1:115585772-115593825
chr1	115575634	115595480	-	7	circRNA	ENSSSCT00000005083	9,8,7,6,5,4,3	1:115553579-115575634|1:115595480-115607660
chr1	115584888	115595480	-	4	circRNA	ENSSSCT00000005083	6,5,4,3	1:115579538-115584888|1:115595480-115607660
chr1	115734902	115859487	+	7	circRNA	ENSSSCT00000005084	2,3,4,5,6,7,8	1:115734755-115734902|1:115859487-115863494
chr1	115791743	115820705	+	3	circRNA	ENSSSCT00000040161	2,3,4	1:115735065-115791743|1:115820705-115857183
chr1	117351744	117507895	-	11	circRNA	ENSSSCT00000059435	19,18,17,16,15,14,13,12,11,10,9	1:117289416-117351744|1:117507895-117520196
chr1	119079825	119091715	+	7	circRNA	ENSSSCT00000005098	3,4,5,6,7,8,9	1:119022431-119079825|1:119091715-119103072
chr1	119087041	119091715	+	3	circRNA	ENSSSCT00000005098	7,8,9	1:119084301-119087041|1:119091715-119103072
chr1	119481809	119487008	+	6	circRNA	ENSSSCT00000005104	14,15,16,17,18,19	1:119475885-119481809|1:119487008-119487613
chr1	119487613	119500634	+	8	circRNA	ENSSSCT00000005104	20,21,22,23,24,25,26,27	1:119487008-119487613|1:119500634-119501801
chr1	119497905	119516561	+	10	circRNA	ENSSSCT00000005104	24,25,26,27,28,29,30,31,32,33	1:119495027-119497905|1:119516561-119518068
chr1	119505795	119516561	+	5	circRNA	ENSSSCT00000005104	29,30,31,32,33	1:119501982-119505795|1:119516561-119518068
chr1	119542573	119571057	+	6	circRNA	ENSSSCT00000005105	2,3,4,5,6,7	1:119537829-119542573|1:119571057-119577279
chr1	119735150	119740313	-	3	circRNA	ENSSSCT00000041237	5,4,3	1:119728807-119735150|1:119740313-119758790
chr1	119738114	119740313	-	2	circRNA	ENSSSCT00000041237	4,3	1:119735315-119738114|1:119740313-119758790
chr1	119871909	119878715	-	4	circRNA	ENSSSCT00000059120	9,8,7,6	1:119865472-119871909|1:119878715-119882891
chr1	119871909	119905302	-	7	circRNA	ENSSSCT00000059120	9,8,7,6,5,4,3	1:119865472-119871909|1:119905302-119909121
chr1	119876496	119878715	-	2	circRNA	ENSSSCT00000059120	7,6	1:119874822-119876496|1:119878715-119882891
chr1	119905145	119909321	-	2	circRNA	ENSSSCT00000059120	3,2	1:119884431-119905145|1:119909321-119948694
chr1	120176021	120185745	+	5	circRNA	ENSSSCT00000044786	2,3,4,5,6	1:120138488-120176021|1:120185745-120203810
chr1	120229991	120239100	+	3	circRNA	ENSSSCT00000044786	16,17,18	1:120227059-120229991|1:120239100-120241786
chr1	120892999	120911093	-	7	circRNA	ENSSSCT00000025088	17,16,15,14,13,12,11	1:120889578-120892999|1:120911093-120914865
chr1	120915564	120933928	-	5	circRNA	ENSSSCT00000025088	9,8,7,6,5	1:120914975-120915564|1:120933928-120937116
chr1	121096267	121097348	+	2	circRNA	ENSSSCT00000059371	2,3	1:121068114-121096267|1:121097348-121098415
chr1	121096267	121099128	+	4	circRNA	ENSSSCT00000059371	2,3,4,5	1:121068114-121096267|1:121099128-121104414
chr1	121097165	121104566	+	4	circRNA	ENSSSCT00000059371	3,4,5,6	1:121096387-121097165|1:121104566-121109035
chr1	121104414	121121454	+	9	circRNA	ENSSSCT00000059371	6,7,8,9,10,11,12,13,14	1:121099128-121104414|1:121121454-121130454
chr1	121109035	121111876	+	4	circRNA	ENSSSCT00000059371	7,8,9,10	1:121104566-121109035|1:121111876-121116154
chr1	121111177	121116999	+	4	circRNA	ENSSSCT00000059371	9,10,11,12	1:121109663-121111177|1:121116999-121119864
chr1	121116154	121116999	+	2	circRNA	ENSSSCT00000059371	11,12	1:121111876-121116154|1:121116999-121119864
chr1	121160752	121179866	+	10	circRNA	ENSSSCT00000055327	2,3,4,5,6,7,8,9,10,11	1:121146386-121160752|1:121179866-121189529
chr1	121172070	121197117	+	10	circRNA	ENSSSCT00000055327	6,7,8,9,10,11,12,13,14,15	1:121168527-121172070|1:121197117-121198403
chr1	121192912	121197117	+	4	circRNA	ENSSSCT00000059656	12,13,14,15	1:121179866-121192912|1:121197117-121198403
chr1	121192912	121215234	+	12	circRNA	ENSSSCT00000059656	12,13,14,15,16,17,18,19,20,21,22,23	1:121179866-121192912|1:121215234-121216357
chr1	121201526	121220450	+	8	circRNA	ENSSSCT00000055327	19,20,21,22,23,24,25,26	1:121200098-121201526|1:121220450-121221588
chr1	121211635	121228255	+	8	circRNA	ENSSSCT00000055327	21,22,23,24,25,26,27,28	1:121203688-121211635|1:121228255-121230750
chr1	121217325	121221648	+	3	circRNA	ENSSSCT00000055327	25,26,27	1:121216490-121217325|1:121221648-121228158
chr1	121217325	121228255	+	4	circRNA	ENSSSCT00000055327	25,26,27,28	1:121216490-121217325|1:121228255-121230750
chr1	121217325	121230821	+	5	circRNA	ENSSSCT00000055327	25,26,27,28,29	1:121216490-121217325|1:121230821-121232942
chr1	121217325	121235683	+	7	circRNA	ENSSSCT00000055327	25,26,27,28,29,30,31	1:121216490-121217325|1:121235683-121238066
chr1	121217325	121238262	+	9	circRNA	ENSSSCT00000055327	25,26,27,28,29,30,31,32,33	1:121216490-121217325|1:121238262-121239050
chr1	121217325	121239905	+	12	circRNA	ENSSSCT00000055327	25,26,27,28,29,30,31,32,33,34,35,36	1:121216490-121217325|1:121239905-121243198
chr1	121220382	121230821	+	4	circRNA	ENSSSCT00000055327	26,27,28,29	1:121218041-121220382|1:121230821-121232942
chr1	121220382	121243452	+	13	circRNA	ENSSSCT00000055327	26,27,28,29,30,31,32,33,34,35,36,37,38	1:121218041-121220382|1:121243452-121248745
chr1	121317191	121335034	-	7	circRNA	ENSSSCT00000005124	16,15,14,13,12,11,10	1:121315386-121317191|1:121335034-121335499
chr1	121330341	121335034	-	2	circRNA	ENSSSCT00000005124	11,10	1:121323297-121330341|1:121335034-121335499
chr1	121334813	121360838	-	9	circRNA	ENSSSCT00000005124	10,9,8,7,6,5,4,3,2	1:121330926-121334813|1:121360838-121375996
chr1	121454890	121464032	+	5	circRNA	ENSSSCT00000053221	2,3,4,5,6	1:121413121-121454890|1:121464032-121478335
chr1	121731740	121738042	+	3	circRNA	ENSSSCT00000005131	4,5,6	1:121694077-121731740|1:121738042-121774838
chr1	121888699	121896972	+	2	circRNA	ENSSSCT00000005131	24,25	1:121872550-121888699|1:121896972-121907633
chr1	122426083	122444476	-	3	circRNA	ENSSSCT00000041131	8,7,6	1:122394745-122426083|1:122444476-122494127
chr1	122494127	122498068	-	2	circRNA	ENSSSCT00000041131	5,4	1:122444476-122494127|1:122498068-122503952
chr1	122557547	122565937	+	7	circRNA	ENSSSCT00000005137	3,4,5,6,7,8,9	1:122556691-122557547|1:122565937-122569705
chr1	122641983	122652467	+	6	circRNA	ENSSSCT00000005138	2,3,4,5,6,7	1:122633931-122641983|1:122652467-122656981
chr1	122651160	122652467	+	3	circRNA	ENSSSCT00000005138	5,6,7	1:122647218-122651160|1:122652467-122656981
chr1	122828852	122849434	+	5	circRNA	ENSSSCT00000052554	6,7,8,9,10	1:122816984-122828852|1:122849434-122866992
chr1	122935777	122951814	+	7	circRNA	ENSSSCT00000005142	14,15,16,17,18,19,20	1:122929618-122935777|1:122951814-122957821
chr1	122957821	122967374	+	4	circRNA	ENSSSCT00000005142	21,22,23,24	1:122951814-122957821|1:122967374-122974615
chr1	123461143	123461622	-	1	ciRNA	ENSSSCT00000040068	1	1:123461094-123461622
chr1	123607337	123626697	+	14	circRNA	ENSSSCT00000040099	2,3,4,5,6,7,8,9,10,11,12,13,14,15	1:123582958-123607337|1:123626697-123634400
chr1	126080089	126082755	-	3	circRNA	ENSSSCT00000041962	11,10,9	1:126078658-126080089|1:126082755-126088915
chr1	126088915	126103029	-	3	circRNA	ENSSSCT00000041962	8,7,6	1:126082755-126088915|1:126103029-126111176
chr1	126102975	126114467	-	3	circRNA	ENSSSCT00000041962	6,5,4	1:126091137-126102975|1:126114467-126114917
chr1	126674491	126678967	-	2	circRNA	ENSSSCT00000055444	5,4	1:126665210-126674491|1:126678967-126684114
chr1	126906616	126953734	+	24	circRNA	ENSSSCT00000005172	3,4,5,6,7,8,9,10,11,12,13,14,15,16,17,18,19,20,21,22,23,24,25,26	1:126905520-126906616|1:126953734-126954998
chr1	126950633	126955106	+	6	circRNA	ENSSSCT00000005172	22,23,24,25,26,27	1:126948918-126950633|1:126955106-126971420
chr1	127066889	127090833	-	3	circRNA	ENSSSCT00000048521	4,3,2	1:127059116-127066889|1:127090833-127125219
chr1	127090623	127090833	-	1	circRNA	ENSSSCT00000048521	2	1:127068976-127090623|1:127090833-127125219
chr1	127175567	127177694	-	2	circRNA	ENSSSCT00000005183	8,7	1:127140968-127175567|1:127177694-127195768
chr1	127195768	127196307	-	2	circRNA	ENSSSCT00000005183	6,5	1:127177694-127195768|1:127196307-127200324
chr1	127195768	127207695	-	5	circRNA	ENSSSCT00000005183	6,5,4,3,2	1:127177694-127195768|1:127207695-127237837
chr1	127746551	127748026	+	2	circRNA	ENSSSCT00000066231	2,3	1:127741686-127746551|1:127748026-127748573
chr1	127746551	127748761	+	3	circRNA	ENSSSCT00000066231	2,3,4	1:127741686-127746551|1:127748761-127749866
chr1	127748573	127750235	+	3	circRNA	ENSSSCT00000066231	4,5,6	1:127748026-127748573|1:127750235-127752033
chr1	127972860	127977436	+	3	circRNA	ENSSSCT00000055830	9,10,11	1:127971517-127972860|1:127977436-127986079
chr1	127977230	127987394	+	2	circRNA	ENSSSCT00000055830	11,12	1:127973884-127977230|1:127987394-127991142
chr1	128262759	128264137	-	3	circRNA	ENSSSCT00000050583	6,5,4	1:128262164-128262759|1:128264137-128268636
chr1	128372163	128401555	+	16	circRNA	ENSSSCT00000046627	7,8,9,10,11,12,13,14,15,16,17,18,19,20,21,22	1:128368605-128372163|1:128401555-128404513
chr1	128374260	128387930	+	5	circRNA	ENSSSCT00000046627	10,11,12,13,14	1:128373685-128374260|1:128387930-128388848
chr1	128405779	128409218	+	3	circRNA	ENSSSCT00000046627	24,25,26	1:128404566-128405779|1:128409218-128411017
chr1	128423904	128441443	+	8	circRNA	ENSSSCT00000046627	31,32,33,34,35,36,37,38	1:128418449-128423904|1:128441443-128446329
chr1	128852872	128864219	-	3	circRNA	ENSSSCT00000037345	8,7,6	1:128850980-128852872|1:128864219-128865267
chr1	129033573	129085684	-	16	circRNA	ENSSSCT00000038692	19,18,17,16,15,14,13,12,11,10,9,8,7,6,5,4	1:129030551-129033573|1:129085684-129093943
chr1	129053474	129085684	-	8	circRNA	ENSSSCT00000038692	11,10,9,8,7,6,5,4	1:129049112-129053474|1:129085684-129093943
chr1	129062736	129078630	-	6	circRNA	ENSSSCT00000038501	12,11,10,9,8,7	1:129053710-129062736|1:129078630-129085556
chr1	129106541	129114618	+	4	circRNA	ENSSSCT00000005226	4,5,6,7	1:129103066-129106541|1:129114618-129119216
chr1	129599706	129616551	-	5	circRNA	ENSSSCT00000005235	21,20,19,18,17	1:129599426-129599706|1:129616551-129616729
chr1	129651196	129662208	-	8	circRNA	ENSSSCT00000005235	9,8,7,6,5,4,3,2	1:129629776-129651196|1:129662208-129687075
chr1	129687075	129688206	-	1	circRNA	ENSSSCT00000005236	2	1:129662208-129687075|1:129688206-129697292
chr1	130010432	130029610	-	5	circRNA	ENSSSCT00000040250	7,6,5,4,3	1:130004421-130010432|1:130029610-130036030
chr1	130089893	130103599	-	3	circRNA	ENSSSCT00000044283	4,3,2	1:130080648-130089893|1:130103599-130112151
chr1	130233522	130242062	+	6	circRNA	ENSSSCT00000005252	2,3,4,5,6,7	1:130202025-130233522|1:130242062-130247719
chr1	130233522	130278467	+	23	circRNA	ENSSSCT00000005252	2,3,4,5,6,7,8,9,10,11,12,13,14,15,16,17,18,19,20,21,22,23,24	1:130202025-130233522|1:130278467-130294648
chr1	130247719	130256849	+	7	circRNA	ENSSSCT00000005252	8,9,10,11,12,13,14	1:130242062-130247719|1:130256849-130264623
chr1	130247719	130269883	+	12	circRNA	ENSSSCT00000005252	8,9,10,11,12,13,14,15,16,17,18,19	1:130242062-130247719|1:130269883-130274867
chr1	130255151	130256849	+	3	circRNA	ENSSSCT00000005252	12,13,14	1:130253340-130255151|1:130256849-130264623
chr1	131098975	131111716	-	7	circRNA	ENSSSCT00000032164	20,19,18,17,16,15,14	1:131096002-131098975|1:131111716-131111835
chr1	131111610	131120613	-	6	circRNA	ENSSSCT00000032164	14,13,12,11,10,9	1:131106285-131111610|1:131120613-131122047
chr1	131113575	131120613	-	4	circRNA	ENSSSCT00000032164	12,11,10,9	1:131111896-131113575|1:131120613-131122047
chr1	131262571	131273283	-	6	circRNA	ENSSSCT00000038114	29,28,27,26,25,24	1:131261766-131262571|1:131273283-131274127
chr1	131284455	131288341	-	2	circRNA	ENSSSCT00000038114	18,17	1:131281653-131284455|1:131288341-131289369
chr1	131326819	131340853	-	5	circRNA	ENSSSCT00000038114	6,5,4,3,2	1:131317230-131326819|1:131340853-131355012
chr1	131329002	131340853	-	4	circRNA	ENSSSCT00000038114	5,4,3,2	1:131326968-131329002|1:131340853-131355012
chr1	132924803	132963031	-	4	circRNA	ENSSSCT00000055368	5,4,3,2	1:132910389-132924803|1:132963031-133015550
chr1	136003626	136010863	+	3	circRNA	ENSSSCT00000047037	2,3,4	1:135887915-136003626|1:136010863-136014881
chr1	136157111	136164328	+	5	circRNA	ENSSSCT00000040622	11,12,13,14,15	1:136153292-136157111|1:136164328-136169361
chr1	136175601	136179661	+	2	circRNA	ENSSSCT00000040622	18,19	1:136172329-136175601|1:136179661-136183362
chr1	136175601	136188157	+	5	circRNA	ENSSSCT00000040622	18,19,20,21,22	1:136172329-136175601|1:136188157-136190465
chr1	136190465	136199337	+	4	circRNA	ENSSSCT00000040622	23,24,25,26	1:136188157-136190465|1:136199337-136203823
chr1	136226170	136229651	+	2	circRNA	ENSSSCT00000040622	35,36	1:136221003-136226170|1:136229651-136233202
chr1	137420452	137423176	-	3	circRNA	ENSSSCT00000005311	13,12,11	1:137415291-137420452|1:137423176-137428448
chr1	137445436	137452742	-	3	circRNA	ENSSSCT00000005311	5,4,3	1:137435206-137445436|1:137452742-137638040
chr1	137638040	137638586	-	1	circRNA	ENSSSCT00000005311	2	1:137452742-137638040|1:137638586-137690311
chr1	138026871	138051339	+	3	circRNA	ENSSSCT00000046932	3,4,5	1:138002410-138026871|1:138051339-138141433
chr1	138050567	138051339	+	2	circRNA	ENSSSCT00000046932	4,5	1:138026912-138050567|1:138051339-138141433
chr1	138468427	138486301	+	4	circRNA	ENSSSCT00000059700	5,6,7,8	1:138430915-138468427|1:138486301-138501930
chr1	138471132	138472413	+	2	circRNA	ENSSSCT00000023102	7,8	1:138468762-138471132|1:138472413-138486113
chr1	139576527	139578175	+	2	circRNA	ENSSSCT00000005325	10,11	1:139575417-139576527|1:139578175-139579818
chr1	139598053	139599600	+	2	circRNA	ENSSSCT00000005325	22,23	1:139595432-139598053|1:139599600-139601964
chr1	141920483	141927044	+	3	circRNA	ENSSSCT00000048664	2,3,4	1:141887772-141920483|1:141927044-141953599
chr1	141971368	141976711	+	5	circRNA	ENSSSCT00000048664	7,8,9,10,11	1:141960820-141971368|1:141976711-141983465
chr1	143881203	143884532	+	3	circRNA	ENSSSCT00000046959	3,4,5	1:143868642-143881203|1:143884532-143890937
chr1	143949376	143960599	-	4	circRNA	ENSSSCT00000043315	5,4,3,2	1:143941768-143949376|1:143960599-143961331
chr1	143977483	143990559	-	7	circRNA	ENSSSCT00000005348	9,8,7,6,5,4,3	1:143974599-143977483|1:143990559-143993144
chr1	144967551	144968613	-	3	circRNA	ENSSSCT00000005359	15,14,13	1:144956314-144967551|1:144968613-144969805
chr1	145568781	145572777	+	4	circRNA	ENSSSCT00000006361	3,4,5,6	1:145555863-145568781|1:145572777-145606819
chr1	145793905	145798752	-	3	circRNA	ENSSSCT00000027561	7,6,5	1:145793410-145793905|1:145798752-145800282
chr1	145950261	145964893	-	5	circRNA	ENSSSCT00000052375	8,7,6,5,4	1:145940446-145950261|1:145964893-145976630
chr1	146128966	146194348	-	7	circRNA	ENSSSCT00000005360	11,10,9,8,7,6,5	1:146094813-146128966|1:146194348-146197457
chr1	146154355	146194348	-	4	circRNA	ENSSSCT00000005360	8,7,6,5	1:146142341-146154355|1:146194348-146197457
chr1	146174105	146194348	-	3	circRNA	ENSSSCT00000005360	7,6,5	1:146154450-146174105|1:146194348-146197457
chr1	146174105	146200405	-	5	circRNA	ENSSSCT00000005360	7,6,5,4,3	1:146154450-146174105|1:146200405-146210411
chr1	146194239	146200405	-	3	circRNA	ENSSSCT00000005360	5,4,3	1:146180999-146194239|1:146200405-146210411
chr1	147709458	147713792	-	4	circRNA	ENSSSCT00000048749	26,25,24,23	1:147703915-147709458|1:147713792-147714592
chr1	147750271	147767245	-	8	circRNA	ENSSSCT00000048749	9,8,7,6,5,4,3,2	1:147743393-147750271|1:147767245-147782006
chr1	147754638	147767245	-	6	circRNA	ENSSSCT00000048749	7,6,5,4,3,2	1:147751381-147754638|1:147767245-147782006
chr1	147756046	147767245	-	5	circRNA	ENSSSCT00000048749	6,5,4,3,2	1:147754782-147756046|1:147767245-147782006
chr1	147765751	147767245	-	2	circRNA	ENSSSCT00000048749	3,2	1:147757351-147765751|1:147767245-147782006
chr1	149357461	149488620	-	3	circRNA	ENSSSCT00000046040	5,4,3	1:149272247-149357461|1:149488620-149512481
chr1	149478220	149488620	-	2	circRNA	ENSSSCT00000046040	4,3	1:149357536-149478220|1:149488620-149512481
chr1	149525671	149542825	-	8	circRNA	ENSSSCT00000005375	11,10,9,8,7,6,5,4	1:149525533-149525671|1:149542825-149544202
chr1	152700473	152737450	+	13	circRNA	ENSSSCT00000043505	8,9,10,11,12,13,14,15,16,17,18,19,20	1:152697783-152700473|1:152737450-152738679
chr1	152723998	152737450	+	7	circRNA	ENSSSCT00000043505	14,15,16,17,18,19,20	1:152722263-152723998|1:152737450-152738679
chr1	158249936	158251386	+	2	circRNA	ENSSSCT00000042862	2,3	1:158233319-158249936|1:158251386-158254826
chr1	158693804	158709994	-	6	circRNA	ENSSSCT00000005402	10,9,8,7,6,5	1:158683129-158693804|1:158709994-158732071
chr1	158693804	158732238	-	7	circRNA	ENSSSCT00000005402	10,9,8,7,6,5,4	1:158683129-158693804|1:158732238-158751248
chr1	158751248	158758254	-	2	circRNA	ENSSSCT00000005402	3,2	1:158732238-158751248|1:158758254-158860590
chr1	158983389	158985622	-	2	circRNA	ENSSSCT00000059984	8,7	1:158981155-158983389|1:158985622-158988465
chr1	158983389	159000991	-	5	circRNA	ENSSSCT00000059984	8,7,6,5,4	1:158981155-158983389|1:159000991-159003257
chr1	158991492	159006320	-	4	circRNA	ENSSSCT00000059984	5,4,3,2	1:158988560-158991492|1:159006320-159021130
chr1	159217322	159257189	-	16	circRNA	ENSSSCT00000063628	27,26,25,24,23,22,21,20,19,18,17,16,15,14,13,12	1:159212274-159217322|1:159257189-159263152
chr1	159242074	159279434	-	11	circRNA	ENSSSCT00000063628	18,17,16,15,14,13,12,11,10,9,8	1:159239948-159242074|1:159279434-159280381
chr1	159263152	159289794	-	9	circRNA	ENSSSCT00000063628	11,10,9,8,7,6,5,4,3	1:159257189-159263152|1:159289794-159298446
chr1	159276019	159289794	-	8	circRNA	ENSSSCT00000063628	10,9,8,7,6,5,4,3	1:159263265-159276019|1:159289794-159298446
chr1	159277861	159279434	-	2	circRNA	ENSSSCT00000063628	9,8	1:159276115-159277861|1:159279434-159280381
chr1	159341716	159350894	+	5	circRNA	ENSSSCT00000039986	7,8,9,10,11	1:159340838-159341716|1:159350894-159362083
chr1	159368256	159375875	+	5	circRNA	ENSSSCT00000039986	14,15,16,17,18	1:159363267-159368256|1:159375875-159378963
chr1	159371731	159375875	+	4	circRNA	ENSSSCT00000039986	15,16,17,18	1:159368396-159371731|1:159375875-159378963
chr1	159371731	159381432	+	6	circRNA	ENSSSCT00000039986	15,16,17,18,19,20	1:159368396-159371731|1:159381432-159388088
chr1	159381329	159398246	+	7	circRNA	ENSSSCT00000039986	20,21,22,23,24,25,26	1:159379072-159381329|1:159398246-159400822
chr1	159390069	159400875	+	6	circRNA	ENSSSCT00000039986	22,23,24,25,26,27	1:159388191-159390069|1:159400875-159415051
chr1	161611161	161620810	+	9	circRNA	ENSSSCT00000052058	2,3,4,5,6,7,8,9,10	1:161607393-161611161|1:161620810-161625394
chr1	161618411	161620810	+	4	circRNA	ENSSSCT00000052058	7,8,9,10	1:161616334-161618411|1:161620810-161625394
chr1	161909789	161920459	-	3	circRNA	ENSSSCT00000041916	8,7,6	1:161884553-161909789|1:161920459-161924525
chr1	161909789	161924707	-	4	circRNA	ENSSSCT00000041916	8,7,6,5	1:161884553-161909789|1:161924707-161936898
chr1	161936898	161939261	-	1	circRNA	ENSSSCT00000041916	4	1:161924707-161936898|1:161939261-161982342
chr1	162115330	162116033	-	2	circRNA	ENSSSCT00000034163	6,5	1:162114456-162115330|1:162116033-162117885
chr1	163013885	163023943	+	9	circRNA	ENSSSCT00000047926	3,4,5,6,7,8,9,10,11	1:163000443-163013885|1:163023943-163026218
chr1	163020390	163020678	+	2	circRNA	ENSSSCT00000047926	7,8	1:163017336-163020390|1:163020678-163023322
chr1	163020390	163023943	+	5	circRNA	ENSSSCT00000047926	7,8,9,10,11	1:163017336-163020390|1:163023943-163026218
chr1	163023322	163026409	+	4	circRNA	ENSSSCT00000047926	9,10,11,12	1:163020678-163023322|1:163026409-163029794
chr1	163026218	163042228	+	6	circRNA	ENSSSCT00000047926	12,13,14,15,16,17	1:163023943-163026218|1:163042228-163044082
chr1	163040325	163042228	+	2	circRNA	ENSSSCT00000047926	16,17	1:163032794-163040325|1:163042228-163044082
chr1	163184040	163189984	-	5	circRNA	ENSSSCT00000005437	10,9,8,7,6	1:163181236-163184040|1:163189984-163197824
chr1	163189294	163197984	-	3	circRNA	ENSSSCT00000005437	7,6,5	1:163188253-163189294|1:163197984-163200142
chr1	163197824	163200297	-	2	circRNA	ENSSSCT00000005437	5,4	1:163189984-163197824|1:163200297-163211216
chr1	163211216	163212239	-	2	circRNA	ENSSSCT00000005437	3,2	1:163200297-163211216|1:163212239-163221740
chr1	163457569	163467256	-	3	circRNA	ENSSSCT00000035110	18,17,16	1:163455822-163457569|1:163467256-163468679
chr1	163457569	163481032	-	10	circRNA	ENSSSCT00000035110	18,17,16,15,14,13,12,11,10,9	1:163455822-163457569|1:163481032-163482951
chr1	163475930	163485045	-	6	circRNA	ENSSSCT00000036317	11,10,9,8,7,6	1:163472363-163475930|1:163485045-163492139
chr1	163477440	163481032	-	3	circRNA	ENSSSCT00000036317	10,9,8	1:163476090-163477440|1:163481032-163482951
chr1	163477440	163485045	-	5	circRNA	ENSSSCT00000036317	10,9,8,7,6	1:163476090-163477440|1:163485045-163492139
chr1	163671351	163674120	-	4	circRNA	ENSSSCT00000044216	29,28,27,26	1:163670022-163671351|1:163674120-163675677
chr1	163673700	163674120	-	2	circRNA	ENSSSCT00000044216	27,26	1:163672293-163673700|1:163674120-163675677
chr1	163683279	163693283	-	4	circRNA	ENSSSCT00000044216	24,23,22,21	1:163675772-163683279|1:163693283-163695854
chr1	163693166	163697214	-	5	circRNA	ENSSSCT00000044216	21,20,19,18,17	1:163692296-163693166|1:163697214-163697798
chr1	163865639	163866262	+	2	circRNA	ENSSSCT00000060675	2,3	1:163858293-163865639|1:163866262-163872162
chr1	163865639	163872243	+	3	circRNA	ENSSSCT00000060675	2,3,4	1:163858293-163865639|1:163872243-163887601
chr1	164357617	164364138	-	3	circRNA	ENSSSCT00000055656	6,5,4	1:164354453-164357617|1:164364138-164366668
chr1	164420444	164422619	+	2	circRNA	ENSSSCT00000036045	2,3	1:164382370-164420444|1:164422619-164432776
chr1	165162979	165168640	-	4	circRNA	ENSSSCT00000039105	5,4,3,2	1:165139328-165162979|1:165168640-165192814
chr1	165481773	165522457	+	6	circRNA	ENSSSCT00000005467	3,4,5,6,7,8	1:165466841-165481773|1:165522457-165549894
chr1	165522392	165582736	+	6	circRNA	ENSSSCT00000036194	8,9,10,11,12,13	1:165514992-165522392|1:165582736-165613692
chr1	165549894	165582736	+	5	circRNA	ENSSSCT00000036194	9,10,11,12,13	1:165522457-165549894|1:165582736-165613692
chr1	165996062	165996507	+	1	circRNA	ENSSSCT00000005470	2	1:165853204-165996062|1:165996507-166033283
chr1	165996062	166044981	+	6	circRNA	ENSSSCT00000005470	2,3,4,5,6,7	1:165853204-165996062|1:166044981-166058339
chr1	165996062	166058413	+	7	circRNA	ENSSSCT00000005470	2,3,4,5,6,7,8	1:165853204-165996062|1:166058413-166070474
chr1	166033283	166037819	+	4	circRNA	ENSSSCT00000005470	3,4,5,6	1:165996507-166033283|1:166037819-166044875
chr1	166033283	166044981	+	5	circRNA	ENSSSCT00000005470	3,4,5,6,7	1:165996507-166033283|1:166044981-166058339
chr1	166033283	166082320	+	11	circRNA	ENSSSCT00000005470	3,4,5,6,7,8,9,10,11,12,13	1:165996507-166033283|1:166082320-166083212
chr1	166036952	166044981	+	3	circRNA	ENSSSCT00000005470	5,6,7	1:166033667-166036952|1:166044981-166058339
chr1	166036952	166058413	+	4	circRNA	ENSSSCT00000005470	5,6,7,8	1:166033667-166036952|1:166058413-166070474
chr1	166036952	166070635	+	5	circRNA	ENSSSCT00000005470	5,6,7,8,9	1:166033667-166036952|1:166070635-166072557
chr1	166036952	166073595	+	7	circRNA	ENSSSCT00000005470	5,6,7,8,9,10,11	1:166033667-166036952|1:166073595-166078166
chr1	166600608	166601501	+	3	circRNA	ENSSSCT00000039054	9,10,11	1:166596808-166600608|1:166601501-166606409
chr1	168363330	168368178	-	2	circRNA	ENSSSCT00000037935	15,14	1:168361463-168363330|1:168368178-168369353
chr1	168368125	168377139	-	6	circRNA	ENSSSCT00000042141	15,14,13,12,11,10	1:168366069-168368125|1:168377139-168380308
chr1	169397266	169410448	-	4	circRNA	ENSSSCT00000036741	37,36,35,34	1:169396051-169397266|1:169410448-169420291
chr1	169420291	169424282	-	3	circRNA	ENSSSCT00000036741	33,32,31	1:169410448-169420291|1:169424282-169425073
chr1	169420291	169430733	-	6	circRNA	ENSSSCT00000036741	33,32,31,30,29,28	1:169410448-169420291|1:169430733-169439041
chr1	169425073	169430733	-	3	circRNA	ENSSSCT00000036741	30,29,28	1:169424282-169425073|1:169430733-169439041
chr1	169427078	169439848	-	4	circRNA	ENSSSCT00000036741	29,28,27,26	1:169425297-169427078|1:169439848-169443838
chr1	169439748	169482865	-	11	circRNA	ENSSSCT00000036741	26,25,24,23,22,21,20,19,18,17,16	1:169439254-169439748|1:169482865-169491975
chr1	169443838	169559446	-	24	circRNA	ENSSSCT00000036741	25,24,23,22,21,20,19,18,17,16,15,14,13,12,11,10,9,8,7,6,5,4,3,2	1:169439848-169443838|1:169559446-169596240
chr1	169450581	169462566	-	4	circRNA	ENSSSCT00000036741	22,21,20,19	1:169448211-169450581|1:169462566-169468879
chr1	169462443	169482865	-	4	circRNA	ENSSSCT00000036741	19,18,17,16	1:169453759-169462443|1:169482865-169491975
chr1	169468879	169482865	-	3	circRNA	ENSSSCT00000036741	18,17,16	1:169462566-169468879|1:169482865-169491975
chr1	169482789	169559446	-	15	circRNA	ENSSSCT00000036741	16,15,14,13,12,11,10,9,8,7,6,5,4,3,2	1:169470604-169482789|1:169559446-169596240
chr1	169491975	169559446	-	14	circRNA	ENSSSCT00000036741	15,14,13,12,11,10,9,8,7,6,5,4,3,2	1:169482865-169491975|1:169559446-169596240
chr1	169503332	169559446	-	13	circRNA	ENSSSCT00000036741	14,13,12,11,10,9,8,7,6,5,4,3,2	1:169492095-169503332|1:169559446-169596240
chr1	169509962	169513314	-	2	circRNA	ENSSSCT00000036741	13,12	1:169503528-169509962|1:169513314-169521967
chr1	169521967	169559446	-	10	circRNA	ENSSSCT00000036741	11,10,9,8,7,6,5,4,3,2	1:169513314-169521967|1:169559446-169596240
chr1	169551754	169559446	-	4	circRNA	ENSSSCT00000036741	5,4,3,2	1:169549716-169551754|1:169559446-169596240
chr1	169558535	169559446	-	1	circRNA	ENSSSCT00000036741	2	1:169556291-169558535|1:169559446-169596240
chr1	169713655	169718710	-	4	circRNA	ENSSSCT00000005500	5,4,3,2	1:169712101-169713655|1:169718710-169722385
chr1	169728314	169730927	+	5	circRNA	ENSSSCT00000055104	4,5,6,7,8	1:169727962-169728314|1:169730927-169731507
chr1	169816374	169823277	+	4	circRNA	ENSSSCT00000065104	13,14,15,16	1:169815485-169816374|1:169823277-169825000
chr1	169821468	169829760	+	5	circRNA	ENSSSCT00000065104	15,16,17,18,19	1:169817298-169821468|1:169829760-169834355
chr1	169840580	169844114	+	3	circRNA	ENSSSCT00000065104	23,24,25	1:169836814-169840580|1:169844114-169847851
chr1	175172537	175178727	-	2	circRNA	ENSSSCT00000005510	3,2	1:175170801-175172537|1:175178727-175180410
chr1	175212417	175230407	+	6	circRNA	ENSSSCT00000025268	2,3,4,5,6,7	1:175200645-175212417|1:175230407-175234853
chr1	175221563	175221857	+	1	circRNA	ENSSSCT00000025268	4	1:175215804-175221563|1:175221857-175223269
chr1	175221563	175230407	+	4	circRNA	ENSSSCT00000025268	4,5,6,7	1:175215804-175221563|1:175230407-175234853
chr1	175221563	175245842	+	7	circRNA	ENSSSCT00000025268	4,5,6,7,8,9,10	1:175215804-175221563|1:175245842-175246592
chr1	175244213	175246746	+	3	circRNA	ENSSSCT00000025268	9,10,11	1:175235006-175244213|1:175246746-175252149
chr1	175246592	175269814	+	9	circRNA	ENSSSCT00000025268	11,12,13,14,15,16,17,18,19	1:175245842-175246592|1:175269814-175273171
chr1	175300726	175306182	+	4	circRNA	ENSSSCT00000065682	2,3,4,5	1:175285403-175300726|1:175306182-175309130
chr1	175412140	175432656	-	7	circRNA	ENSSSCT00000005514	10,9,8,7,6,5,4	1:175409456-175412140|1:175432656-175438487
chr1	175412140	175443338	-	9	circRNA	ENSSSCT00000005514	10,9,8,7,6,5,4,3,2	1:175409456-175412140|1:175443338-175448197
chr1	175422948	175443338	-	6	circRNA	ENSSSCT00000005514	7,6,5,4,3,2	1:175421500-175422948|1:175443338-175448197
chr1	175432582	175438963	-	2	circRNA	ENSSSCT00000005514	4,3	1:175430411-175432582|1:175438963-175442706
chr1	175438487	175438963	-	1	circRNA	ENSSSCT00000005514	3	1:175432656-175438487|1:175438963-175442706
chr1	179618865	179621087	+	6	circRNA	ENSSSCT00000055603	5,6,7,8,9,10	1:179618306-179618865|1:179621087-179622349
chr1	179628010	179665826	-	25	circRNA	ENSSSCT00000005527	28,27,26,25,24,23,22,21,20,19,18,17,16,15,14,13,12,11,10,9,8,7,6,5,4	1:179626553-179628010|1:179665826-179669749
chr1	179631515	179638570	-	7	circRNA	ENSSSCT00000005527	26,25,24,23,22,21,20	1:179628421-179631515|1:179638570-179640357
chr1	179650257	179656225	-	8	circRNA	ENSSSCT00000005527	16,15,14,13,12,11,10,9	1:179646382-179650257|1:179656225-179657007
chr1	179686394	179686694	-	1	circRNA	ENSSSCT00000031702	1	None|None
chr1	179946275	179956922	-	4	circRNA	ENSSSCT00000005531	15,14,13,12	1:179940617-179946275|1:179956922-179957821
chr1	179955074	179959267	-	4	circRNA	ENSSSCT00000005531	13,12,11,10	1:179949230-179955074|1:179959267-179969602
chr1	179957821	179958477	-	1	circRNA	ENSSSCT00000005531	11	1:179956922-179957821|1:179958477-179959139
chr1	179969602	179997417	-	7	circRNA	ENSSSCT00000005531	9,8,7,6,5,4,3	1:179959267-179969602|1:179997417-180014529
chr1	180223967	180229368	-	4	circRNA	ENSSSCT00000053912	13,12,11,10	1:180209747-180223967|1:180229368-180236105
chr1	180407634	180431593	-	4	circRNA	ENSSSCT00000037532	5,4,3,2	1:180395721-180407634|1:180431593-180433973
chr1	180431149	180431593	-	1	circRNA	ENSSSCT00000037532	2	1:180416783-180431149|1:180431593-180433973
chr1	180489461	180499197	-	4	circRNA	ENSSSCT00000053603	23,22,21,20	1:180484616-180489461|1:180499197-180500584
chr1	180529104	180552016	-	8	circRNA	ENSSSCT00000041637	9,8,7,6,5,4,3,2	1:180525932-180529104|1:180552016-180553579
chr1	181386970	181390515	+	3	circRNA	ENSSSCT00000066327	4,5,6	1:181383576-181386970|1:181390515-181394302
chr1	182118904	182194969	-	18	circRNA	ENSSSCT00000052025	19,18,17,16,15,14,13,12,11,10,9,8,7,6,5,4,3,2	1:182113916-182118904|1:182194969-182202669
chr1	182134579	182139525	-	2	circRNA	ENSSSCT00000045130	14,13	1:182134023-182134579|1:182139525-182140325
chr1	182161652	182169099	-	3	circRNA	ENSSSCT00000045130	8,7,6	1:182147857-182161652|1:182169099-182184847
chr1	182184847	182194969	-	5	circRNA	ENSSSCT00000052025	6,5,4,3,2	1:182169099-182184847|1:182194969-182202669
chr1	182231885	182234106	+	2	circRNA	ENSSSCT00000005552	2,3	1:182203933-182231885|1:182234106-182257868
chr1	182335258	182341782	+	6	circRNA	ENSSSCT00000056381	5,6,7,8,9,10	1:182330838-182335258|1:182341782-182344155
chr1	182338670	182341116	+	3	circRNA	ENSSSCT00000056381	7,8,9	1:182335939-182338670|1:182341116-182341720
chr1	182338670	182341782	+	4	circRNA	ENSSSCT00000056381	7,8,9,10	1:182335939-182338670|1:182341782-182344155
chr1	182340846	182341116	+	2	circRNA	ENSSSCT00000056381	8,9	1:182338758-182340846|1:182341116-182341720
chr1	182341720	182348499	+	4	circRNA	ENSSSCT00000056381	10,11,12,13	1:182341116-182341720|1:182348499-182354460
chr1	182344155	182348499	+	3	circRNA	ENSSSCT00000056381	11,12,13	1:182341782-182344155|1:182348499-182354460
chr1	182373762	182388778	+	7	circRNA	ENSSSCT00000038827	2,3,4,5,6,7,8	1:182357981-182373762|1:182388778-182400827
chr1	182375386	182380474	+	2	circRNA	ENSSSCT00000038827	3,4	1:182373795-182375386|1:182380474-182384880
chr1	182535316	182542799	-	4	circRNA	ENSSSCT00000047893	10,9,8,7	1:182527637-182535316|1:182542799-182544813
chr1	182535316	182577496	-	8	circRNA	ENSSSCT00000047893	10,9,8,7,6,5,4,3	1:182527637-182535316|1:182577496-182604792
chr1	182544813	182545513	-	2	circRNA	ENSSSCT00000047893	6,5	1:182542799-182544813|1:182545513-182565517
chr1	182678726	182720865	-	10	circRNA	ENSSSCT00000064162	11,10,9,8,7,6,5,4,3,2	1:182670047-182678726|1:182720865-182753212
chr1	182683008	182720865	-	8	circRNA	ENSSSCT00000064162	9,8,7,6,5,4,3,2	1:182680342-182683008|1:182720865-182753212
chr1	182688833	182720865	-	7	circRNA	ENSSSCT00000064162	8,7,6,5,4,3,2	1:182683158-182688833|1:182720865-182753212
chr1	182698436	182720865	-	5	circRNA	ENSSSCT00000064162	6,5,4,3,2	1:182690577-182698436|1:182720865-182753212
chr1	182709190	182720865	-	3	circRNA	ENSSSCT00000064162	4,3,2	1:182704817-182709190|1:182720865-182753212
chr1	183855264	183855936	-	1	ciRNA	ENSSSCT00000039702	4	1:183855262-183855936
chr1	184048956	184049475	+	1	circRNA	ENSSSCT00000024259	3	1:183917562-184048956|1:184049475-184083976
chr1	184048956	184100878	+	4	circRNA	ENSSSCT00000024259	3,4,5,6	1:183917562-184048956|1:184100878-184108597
chr1	184048956	184116952	+	7	circRNA	ENSSSCT00000024259	3,4,5,6,7,8,9	1:183917562-184048956|1:184116952-184121186
chr1	184355148	184356505	-	3	circRNA	ENSSSCT00000005569	7,6,5	1:184350540-184355148|1:184356505-184361146
chr1	184715051	184717478	-	2	circRNA	ENSSSCT00000005575	7,6	1:184711283-184715051|1:184717478-184720488
chr1	184914187	184920865	+	2	circRNA	ENSSSCT00000043033	2,3	1:184881942-184914187|1:184920865-184923502
chr1	184914187	184923633	+	3	circRNA	ENSSSCT00000043033	2,3,4	1:184881942-184914187|1:184923633-184929862
chr1	184917907	184937075	+	8	circRNA	ENSSSCT00000005577	3,4,5,6,7,8,9,10	1:184914740-184917907|1:184937075-184940160
chr1	184920694	184923633	+	2	circRNA	ENSSSCT00000043033	3,4	1:184914740-184920694|1:184923633-184929862
chr1	184953789	184963408	+	10	circRNA	ENSSSCT00000043033	21,22,23,24,25,26,27,28,29,30	1:184952874-184953789|1:184963408-184965643
chr1	185858078	185878194	+	6	circRNA	ENSSSCT00000055762	8,9,10,11,12,13	1:185854864-185858078|1:185878194-185882650
chr1	186415389	186418273	-	3	circRNA	ENSSSCT00000005583	4,3,2	1:186410622-186415389|1:186418273-186429843
chr1	186442611	186443769	+	3	circRNA	ENSSSCT00000037259	4,5,6	1:186441818-186442611|1:186443769-186448119
chr1	187315687	187323793	+	4	circRNA	ENSSSCT00000030515	5,6,7,8	1:187313926-187315687|1:187323793-187328002
chr1	187319035	187331435	+	5	circRNA	ENSSSCT00000030515	7,8,9,10,11	1:187318455-187319035|1:187331435-187332373
chr1	187388813	187401467	+	5	circRNA	ENSSSCT00000005590	3,4,5,6,7	1:187386677-187388813|1:187401467-187403407
chr1	187391639	187401467	+	3	circRNA	ENSSSCT00000005590	5,6,7	1:187390527-187391639|1:187401467-187403407
chr1	187391639	187411824	+	7	circRNA	ENSSSCT00000005590	5,6,7,8,9,10,11	1:187390527-187391639|1:187411824-187424492
chr1	189124503	189125884	+	4	circRNA	ENSSSCT00000005601	3,4,5,6	1:189121724-189124503|1:189125884-189129372
chr1	189136728	189138606	+	2	circRNA	ENSSSCT00000005601	9,10	1:189132482-189136728|1:189138606-189149834
chr1	189746193	189769062	+	5	circRNA	ENSSSCT00000005610	2,3,4,5,6	1:189690570-189746193|1:189769062-189808956
chr1	189746193	189809078	+	6	circRNA	ENSSSCT00000005610	2,3,4,5,6,7	1:189690570-189746193|1:189809078-189907687
chr1	189763514	189809078	+	3	circRNA	ENSSSCT00000005610	5,6,7	1:189757590-189763514|1:189809078-189907687
chr1	190336386	190367567	+	5	circRNA	ENSSSCT00000005616	6,7,8,9,10	1:190334891-190336386|1:190367567-190412831
chr1	190648252	190649258	+	3	circRNA	ENSSSCT00000005618	3,4,5	1:190625617-190648252|1:190649258-190653540
chr1	190648252	190654424	+	5	circRNA	ENSSSCT00000005618	3,4,5,6,7	1:190625617-190648252|1:190654424-190661903
chr1	190653540	190662010	+	3	circRNA	ENSSSCT00000005618	6,7,8	1:190649258-190653540|1:190662010-190663320
chr1	193989472	194004255	-	9	circRNA	ENSSSCT00000054162	82,81,80,79,78,77,76,75,74	1:193987220-193989472|1:194004255-194005336
chr1	194001519	194011399	-	9	circRNA	ENSSSCT00000054162	76,75,74,73,72,71,70,69,68	1:194000575-194001519|1:194011399-194012212
chr1	194038569	194064182	-	8	circRNA	ENSSSCT00000054162	57,56,55,54,53,52,51,50	1:194035628-194038569|1:194064182-194065266
chr1	194063963	194065411	-	2	circRNA	ENSSSCT00000054162	50,49	1:194055452-194063963|1:194065411-194067746
chr1	194164797	194207376	-	7	circRNA	ENSSSCT00000054162	7,6,5,4,3,2,1	1:194157211-194164797|None
chr1	194586329	194619966	+	3	circRNA	ENSSSCT00000032151	3,4,5	1:194507877-194586329|1:194619966-194636761
chr1	195982744	196008940	-	8	circRNA	ENSSSCT00000049950	9,8,7,6,5,4,3,2	1:195967621-195982744|1:196008940-196051766
chr1	196100532	196103400	-	3	circRNA	ENSSSCT00000005649	16,15,14	1:196092859-196100532|1:196103400-196118278
chr1	196204347	196206049	+	2	circRNA	ENSSSCT00000005651	8,9	1:196200169-196204347|1:196206049-196207844
chr1	196235463	196237559	+	3	circRNA	ENSSSCT00000005652	2,3,4	1:196229924-196235463|1:196237559-196251534
chr1	201965064	202026822	-	16	circRNA	ENSSSCT00000055841	36,35,34,33,32,31,30,29,28,27,26,25,24,23,22,21	1:201957251-201965064|1:202026822-202041878
chr1	201991307	202004608	-	4	circRNA	ENSSSCT00000055841	29,28,27,26	1:201989877-201991307|1:202004608-202007483
chr1	202015754	202055132	-	6	circRNA	ENSSSCT00000055841	23,22,21,20,19,18	1:202010352-202015754|1:202055132-202061210
chr1	202041878	202225299	-	19	circRNA	ENSSSCT00000055841	20,19,18,17,16,15,14,13,12,11,10,9,8,7,6,5,4,3,2	1:202026822-202041878|1:202225299-202228121
chr1	202170880	202225299	-	7	circRNA	ENSSSCT00000055841	8,7,6,5,4,3,2	1:202167776-202170880|1:202225299-202228121
chr1	202176835	202188317	-	3	circRNA	ENSSSCT00000055841	7,6,5	1:202170968-202176835|1:202188317-202207301
chr1	202176835	202207406	-	4	circRNA	ENSSSCT00000055841	7,6,5,4	1:202170968-202176835|1:202207406-202222569
chr1	202188215	202228210	-	5	circRNA	ENSSSCT00000056267	7,6,5,4,3	1:202180917-202188215|1:202228210-202254538
chr1	202207301	202228210	-	4	circRNA	ENSSSCT00000056267	6,5,4,3	1:202188317-202207301|1:202228210-202254538
chr1	202207301	202254632	-	5	circRNA	ENSSSCT00000056267	6,5,4,3,2	1:202188317-202207301|1:202254632-202258784
chr1	202536296	202536998	+	1	circRNA	ENSSSCT00000050425	5	1:202488835-202536296|1:202536998-202581851
chr1	203502033	203504966	-	2	circRNA	ENSSSCT00000052325	17,16	1:203495500-203502033|1:203504966-203507696
chr1	203507696	203509434	-	3	circRNA	ENSSSCT00000052325	15,14,13	1:203504966-203507696|1:203509434-203515104
chr1	203507915	203547745	-	12	circRNA	ENSSSCT00000052325	14,13,12,11,10,9,8,7,6,5,4,3	1:203507827-203507915|1:203547745-203560905
chr1	203515104	203537078	-	5	circRNA	ENSSSCT00000052325	12,11,10,9,8	1:203509434-203515104|1:203537078-203538847
chr1	203515104	203547745	-	10	circRNA	ENSSSCT00000052325	12,11,10,9,8,7,6,5,4,3	1:203509434-203515104|1:203547745-203560905
chr1	203531905	203537078	-	3	circRNA	ENSSSCT00000052325	10,9,8	1:203516233-203531905|1:203537078-203538847
chr1	203531905	203547745	-	8	circRNA	ENSSSCT00000052325	10,9,8,7,6,5,4,3	1:203516233-203531905|1:203547745-203560905
chr1	203531905	203561227	-	9	circRNA	ENSSSCT00000052325	10,9,8,7,6,5,4,3,2	1:203516233-203531905|1:203561227-203600889
chr1	203536416	203538914	-	3	circRNA	ENSSSCT00000052325	9,8,7	1:203532081-203536416|1:203538914-203539923
chr1	203546397	203547745	-	2	circRNA	ENSSSCT00000052325	4,3	1:203544473-203546397|1:203547745-203560905
chr1	203685645	203685979	+	2	circRNA	ENSSSCT00000054843	2,3	1:203684099-203685645|1:203685979-203688335
chr1	203685645	203692596	+	6	circRNA	ENSSSCT00000054843	2,3,4,5,6,7	1:203684099-203685645|1:203692596-203693813
chr1	203685645	203694104	+	7	circRNA	ENSSSCT00000054843	2,3,4,5,6,7,8	1:203684099-203685645|1:203694104-203708879
chr1	203685783	203685979	+	1	circRNA	ENSSSCT00000054843	3	1:203685697-203685783|1:203685979-203688335
chr1	203685979	203688335	+	1	ciRNA	ENSSSCT00000054843	3	1:203685979-203688335
chr1	203689745	203694104	+	4	circRNA	ENSSSCT00000054843	5,6,7,8	1:203688418-203689745|1:203694104-203708879
chr1	204028923	204099075	-	6	circRNA	ENSSSCT00000037462	22,21,20,19,18,17	1:203978145-204028923|1:204099075-204104579
chr1	207033346	207066744	-	3	circRNA	ENSSSCT00000051651	10,9,8	1:207003207-207033346|1:207066744-207082557
chr1	207190792	207194651	+	3	circRNA	ENSSSCT00000005714	4,5,6	1:207177901-207190792|1:207194651-207199871
chr1	207858353	207861882	+	2	circRNA	ENSSSCT00000051251	5,6	1:207851828-207858353|1:207861882-207891285
chr1	208189591	208361002	+	4	circRNA	ENSSSCT00000044141	2,3,4,5	1:208183585-208189591|1:208361002-208364423
chr1	208322287	208407707	+	9	circRNA	ENSSSCT00000061544	3,4,5,6,7,8,9,10,11	1:208190123-208322287|1:208407707-208420874
chr1	208355017	208364542	+	3	circRNA	ENSSSCT00000044141	4,5,6	1:208322341-208355017|1:208364542-208384870
chr1	208355017	208389714	+	5	circRNA	ENSSSCT00000044141	4,5,6,7,8	1:208322341-208355017|1:208389714-208420874
chr1	208360881	208364542	+	2	circRNA	ENSSSCT00000044141	5,6	1:208355086-208360881|1:208364542-208384870
chr1	209240700	209244141	+	3	circRNA	ENSSSCT00000063823	8,9,10	1:209238861-209240700|1:209244141-209254565
chr1	209261052	209264499	+	3	circRNA	ENSSSCT00000063823	14,15,16	1:209258560-209261052|1:209264499-209265579
chr1	209264310	209265789	+	2	circRNA	ENSSSCT00000063823	16,17	1:209262235-209264310|1:209265789-209268741
chr1	209302742	209320317	+	8	circRNA	ENSSSCT00000063823	25,26,27,28,29,30,31,32	1:209296354-209302742|1:209320317-209328951
chr1	215191227	215219681	-	3	circRNA	ENSSSCT00000056156	17,16,15	1:215138789-215191227|1:215219681-215221379
chr1	215191227	215263876	-	8	circRNA	ENSSSCT00000056156	17,16,15,14,13,12,11,10	1:215138789-215191227|1:215263876-215266693
chr1	215256333	215266887	-	4	circRNA	ENSSSCT00000056156	12,11,10,9	1:215223631-215256333|1:215266887-215371011
chr1	215732367	215736396	-	2	circRNA	ENSSSCT00000042261	14,13	1:215731233-215732367|1:215736396-215737027
chr1	215743546	215771774	-	7	circRNA	ENSSSCT00000042261	10,9,8,7,6,5,4	1:215740221-215743546|1:215771774-215789121
chr1	215745864	215754716	-	4	circRNA	ENSSSCT00000042261	9,8,7,6	1:215743653-215745864|1:215754716-215757441
chr1	215771555	215789381	-	2	circRNA	ENSSSCT00000042261	4,3	1:215757551-215771555|1:215789381-215801554
chr1	216148994	216177064	+	2	circRNA	ENSSSCT00000005737	2,3	1:216116573-216148994|1:216177064-216190559
chr1	216148994	216199042	+	4	circRNA	ENSSSCT00000005737	2,3,4,5	1:216116573-216148994|1:216199042-216214872
chr1	216175646	216177064	+	1	circRNA	ENSSSCT00000005737	3	1:216149195-216175646|1:216177064-216190559
chr1	216332767	216333648	+	2	circRNA	ENSSSCT00000005739	5,6	1:216320574-216332767|1:216333648-216341012
chr1	216427781	216434127	-	3	circRNA	ENSSSCT00000005740	6,5,4	1:216420611-216427781|1:216434127-216452784
chr1	216889403	216893008	-	3	circRNA	ENSSSCT00000034678	13,12,11	1:216887789-216889403|1:216893008-216895535
chr1	216889403	216897938	-	5	circRNA	ENSSSCT00000034678	13,12,11,10,9	1:216887789-216889403|1:216897938-216899964
chr1	216892030	216893008	-	2	circRNA	ENSSSCT00000034678	12,11	1:216889538-216892030|1:216893008-216895535
chr1	216892821	216933620	-	8	circRNA	ENSSSCT00000034678	11,10,9,8,7,6,5,4	1:216892158-216892821|1:216933620-216950751
chr1	216914274	216918840	-	2	circRNA	ENSSSCT00000034678	6,5	1:216901186-216914274|1:216918840-216933496
chr1	216933496	216951002	-	2	circRNA	ENSSSCT00000034678	4,3	1:216918840-216933496|1:216951002-217001150
chr1	217250144	217251072	+	1	ciRNA	ENSSSCT00000027088	2	1:217250144-217251133
chr1	217331109	217351085	+	8	circRNA	ENSSSCT00000050630	6,7,8,9,10,11,12,13	1:217328125-217331109|None
chr1	218542444	218573173	+	3	circRNA	ENSSSCT00000022279	4,5,6	1:218523970-218542444|1:218573173-218585405
chr1	218559748	218573173	+	3	circRNA	ENSSSCT00000057324	5,6,7	1:218542703-218559748|1:218573173-218585405
chr1	218569067	218573173	+	2	circRNA	ENSSSCT00000022279	5,6	1:218542703-218569067|1:218573173-218585405
chr1	219000458	219002085	+	2	circRNA	ENSSSCT00000005761	2,3	1:218994260-219000458|1:219002085-219005077
chr1	219000458	219005882	+	4	circRNA	ENSSSCT00000005761	2,3,4,5	1:218994260-219000458|1:219005882-219008810
chr1	219000458	219008904	+	5	circRNA	ENSSSCT00000005761	2,3,4,5,6	1:218994260-219000458|1:219008904-219009382
chr1	219009382	219016372	+	5	circRNA	ENSSSCT00000005761	7,8,9,10,11	1:219008904-219009382|1:219016372-219017482
chr1	219009382	219017536	+	6	circRNA	ENSSSCT00000005761	7,8,9,10,11,12	1:219008904-219009382|1:219017536-219020765
chr1	219010540	219028462	+	7	circRNA	ENSSSCT00000005761	8,9,10,11,12,13,14	1:219009449-219010540|1:219028462-219029165
chr1	219640994	219661659	-	4	circRNA	ENSSSCT00000005766	31,30,29,28	1:219627511-219640994|1:219661659-219700609
chr1	219661441	219802079	-	27	circRNA	ENSSSCT00000005766	28,27,26,25,24,23,22,21,20,19,18,17,16,15,14,13,12,11,10,9,8,7,6,5,4,3,2	1:219643357-219661441|1:219802079-219813217
chr1	219700609	219730732	-	8	circRNA	ENSSSCT00000005766	27,26,25,24,23,22,21,20	1:219661659-219700609|1:219730732-219740204
chr1	219729928	219774774	-	15	circRNA	ENSSSCT00000005766	21,20,19,18,17,16,15,14,13,12,11,10,9,8,7	1:219726102-219729928|1:219774774-219776720
chr1	219740204	219802079	-	18	circRNA	ENSSSCT00000005766	19,18,17,16,15,14,13,12,11,10,9,8,7,6,5,4,3,2	1:219730732-219740204|1:219802079-219813217
chr1	221778749	221783005	+	2	circRNA	ENSSSCT00000005777	9,10	1:221758245-221778749|1:221783005-221799235
chr1	222159434	222296761	+	12	circRNA	ENSSSCT00000023207	2,3,4,5,6,7,8,9,10,11,12,13	1:222038669-222159434|1:222296761-222355571
chr1	222211741	222244262	+	4	circRNA	ENSSSCT00000023207	4,5,6,7	1:222164144-222211741|1:222244262-222271827
chr1	222225879	222355689	+	10	circRNA	ENSSSCT00000023207	5,6,7,8,9,10,11,12,13,14	1:222211872-222225879|1:222355689-222378289
chr1	222271827	222290918	+	5	circRNA	ENSSSCT00000023207	8,9,10,11,12	1:222244262-222271827|1:222290918-222296616
chr1	222290762	222296761	+	2	circRNA	ENSSSCT00000023207	12,13	1:222278642-222290762|1:222296761-222355571
chr1	222582658	222587312	+	4	circRNA	ENSSSCT00000005781	9,10,11,12	1:222581872-222582658|1:222587312-222588326
chr1	222582658	222588477	+	5	circRNA	ENSSSCT00000005781	9,10,11,12,13	1:222581872-222582658|1:222588477-222592398
chr1	222604810	222610648	+	4	circRNA	ENSSSCT00000005781	20,21,22,23	1:222598571-222604810|1:222610648-222612079
chr1	223057448	223065782	-	2	circRNA	ENSSSCT00000042045	4,3	1:223048835-223057448|1:223065782-223077336
chr1	223057448	223077506	-	3	circRNA	ENSSSCT00000042045	4,3,2	1:223048835-223057448|1:223077506-223089464
chr1	223565044	223572485	+	2	circRNA	ENSSSCT00000049308	2,3	1:223560602-223565044|1:223572485-223585501
chr1	223565044	223617054	+	10	circRNA	ENSSSCT00000049308	2,3,4,5,6,7,8,9,10,11	1:223560602-223565044|1:223617054-223625974
chr1	223593899	223596456	+	3	circRNA	ENSSSCT00000049308	6,7,8	1:223592394-223593899|1:223596456-223608484
chr1	223608484	223617054	+	3	circRNA	ENSSSCT00000049308	9,10,11	1:223596456-223608484|1:223617054-223625974
chr1	223608484	223647693	+	13	circRNA	ENSSSCT00000049308	9,10,11,12,13,14,15,16,17,18,19,20,21	1:223596456-223608484|1:223647693-223649233
chr1	223649233	223649589	+	2	circRNA	ENSSSCT00000049308	22,23	1:223647693-223649233|1:223649589-223650992
chr1	227839457	227861071	-	6	circRNA	ENSSSCT00000048657	29,28,27,26,25,24	1:227837738-227839457|1:227861071-227866025
chr1	228063645	228083143	-	5	circRNA	ENSSSCT00000005806	6,5,4,3,2	1:228058352-228063645|1:228083143-228091797
chr1	228980933	228986161	+	2	circRNA	ENSSSCT00000046278	4,5	1:228943835-228980933|1:228986161-229022736
chr1	229603969	229612467	-	4	circRNA	ENSSSCT00000048113	6,5,4,3	1:229603951-229603969|1:229612467-229621071
chr1	230100569	230101283	+	2	circRNA	ENSSSCT00000044785	2,3	1:230069709-230100569|1:230101283-230108922
chr1	230250824	230280276	+	13	circRNA	ENSSSCT00000005817	31,32,33,34,35,36,37,38,39,40,41,42,43	1:230245703-230250824|1:230280276-230287974
chr1	230250824	230289458	+	15	circRNA	ENSSSCT00000005817	31,32,33,34,35,36,37,38,39,40,41,42,43,44,45	1:230245703-230250824|1:230289458-230291237
chr1	230250824	230304218	+	22	circRNA	ENSSSCT00000005817	31,32,33,34,35,36,37,38,39,40,41,42,43,44,45,46,47,48,49,50,51,52	1:230245703-230250824|1:230304218-230322184
chr1	230266503	230273337	+	2	circRNA	ENSSSCT00000005817	37,38	1:230260047-230266503|1:230273337-230276436
chr1	230672891	230796006	-	4	circRNA	ENSSSCT00000057300	6,5,4,3	1:230613463-230672891|1:230796006-230906836
chr1	235969398	235983215	+	5	circRNA	ENSSSCT00000026971	2,3,4,5,6	1:235919117-235969398|1:235983215-235998984
chr1	235970786	235977603	+	3	circRNA	ENSSSCT00000026971	3,4,5	1:235969428-235970786|1:235977603-235983141
chr1	235976284	235983215	+	3	circRNA	ENSSSCT00000026971	4,5,6	1:235970886-235976284|1:235983215-235998984
chr1	236043217	236061313	+	3	circRNA	ENSSSCT00000026971	8,9,10	1:235999042-236043217|1:236061313-236118706
chr1	236135798	236151861	+	16	circRNA	ENSSSCT00000005843	21,22,23,24,25,26,27,28,29,30,31,32,33,34,35,36	1:236133714-236135798|1:236151861-236153044
chr1	236469950	236471042	+	4	circRNA	ENSSSCT00000005859	4,5,6,7	1:236469381-236469950|1:236471042-236471501
chr1	237126955	237127531	-	2	circRNA	ENSSSCT00000044797	8,7	1:237125219-237126955|1:237127531-237130043
chr1	237142950	237157384	-	2	circRNA	ENSSSCT00000044797	4,3	1:237132799-237142950|1:237157384-237164133
chr1	238015228	238018002	+	3	circRNA	ENSSSCT00000005885	5,6,7	1:237922715-238015228|1:238018002-238039197
chr1	238237634	238241403	-	3	circRNA	ENSSSCT00000028359	10,9,8	1:238234640-238237634|1:238241403-238242414
chr1	238247723	238251089	-	2	circRNA	ENSSSCT00000028359	5,4	1:238244241-238247723|1:238251089-238257619
chr1	238519258	238520959	+	3	circRNA	ENSSSCT00000044620	2,3,4	1:238516112-238519258|1:238520959-238524376
chr1	238594022	238609475	+	2	circRNA	ENSSSCT00000005896	2,3	1:238568236-238594022|1:238609475-238620342
chr1	238620342	238622572	+	2	circRNA	ENSSSCT00000005896	4,5	1:238609475-238620342|1:238622572-238626329
chr1	239545485	239564082	-	4	circRNA	ENSSSCT00000005908	5,4,3,2	1:239535824-239545485|1:239564082-239568366
chr1	239548009	239564082	-	3	circRNA	ENSSSCT00000005908	4,3,2	1:239545603-239548009|1:239564082-239568366
chr1	239800373	239832709	-	4	circRNA	ENSSSCT00000065984	5,4,3,2	1:239795725-239800373|1:239832709-239842441
chr1	239891231	239905198	+	3	circRNA	ENSSSCT00000062686	3,4,5	1:239866574-239891231|1:239905198-239910078
chr1	240889405	240900266	+	3	circRNA	ENSSSCT00000026821	2,3,4	1:240842819-240889405|1:240900266-240905200
chr1	241809452	241824281	-	6	circRNA	ENSSSCT00000052989	11,10,9,8,7,6	1:241791514-241809452|1:241824281-241850244
chr1	241850244	241856444	-	4	circRNA	ENSSSCT00000052989	5,4,3,2	1:241824281-241850244|1:241856444-241897292
chr1	241979931	241993256	+	5	circRNA	ENSSSCT00000005931	6,7,8,9,10	1:241975129-241979931|1:241993256-241997907
chr1	241979931	241998014	+	6	circRNA	ENSSSCT00000005931	6,7,8,9,10,11	1:241975129-241979931|1:241998014-242004063
chr1	241979931	242018942	+	8	circRNA	ENSSSCT00000005931	6,7,8,9,10,11,12,13	1:241975129-241979931|1:242018942-242032730
chr1	242018655	242018942	+	1	circRNA	ENSSSCT00000005931	13	1:242004276-242018655|1:242018942-242032730
chr1	242064594	242116331	-	13	circRNA	ENSSSCT00000039346	14,13,12,11,10,9,8,7,6,5,4,3,2	1:242059679-242064594|1:242116331-242120349
chr1	242111790	242113126	-	2	circRNA	ENSSSCT00000005932	4,3	1:242104473-242111790|1:242113126-242116142
chr1	242111790	242116331	-	3	circRNA	ENSSSCT00000005932	4,3,2	1:242104473-242111790|1:242116331-242120349
chr1	242920826	242934963	+	2	circRNA	ENSSSCT00000049737	3,4	1:242822693-242920826|1:242934963-242955049
chr1	242959990	242963981	+	2	circRNA	ENSSSCT00000049737	6,7	1:242955300-242959990|1:242963981-243021383
chr1	243353402	243354450	-	1	circRNA	ENSSSCT00000039649	3	1:243316228-243353402|1:243354450-243370484
chr1	243353402	243371089	-	2	circRNA	ENSSSCT00000039649	3,2	1:243316228-243353402|1:243371089-243414229
chr1	246218296	246239704	-	4	circRNA	ENSSSCT00000005966	6,5,4,3	1:246206636-246218296|1:246239704-246243767
chr1	246218296	246243861	-	5	circRNA	ENSSSCT00000005966	6,5,4,3,2	1:246206636-246218296|1:246243861-246257314
chr1	246238088	246243861	-	3	circRNA	ENSSSCT00000005966	4,3,2	1:246220652-246238088|1:246243861-246257314
chr1	246866710	246874253	+	3	circRNA	ENSSSCT00000005970	2,3,4	1:246853522-246866710|1:246874253-246883453
chr1	248463644	248474020	+	4	circRNA	ENSSSCT00000005980	2,3,4,5	1:248448681-248463644|1:248474020-248480226
chr1	248463644	248483274	+	6	circRNA	ENSSSCT00000005980	2,3,4,5,6,7	1:248448681-248463644|1:248483274-248485252
chr1	248467611	248468871	+	2	circRNA	ENSSSCT00000005980	3,4	1:248463726-248467611|1:248468871-248473964
chr1	248467611	248474020	+	3	circRNA	ENSSSCT00000005980	3,4,5	1:248463726-248467611|1:248474020-248480226
chr1	249962771	249971713	+	7	circRNA	ENSSSCT00000056556	27,28,29,30,31,32,33	1:249960291-249962771|1:249971713-249975310
chr1	250036614	250044396	-	4	circRNA	ENSSSCT00000005987	8,7,6,5	1:250033303-250036614|1:250044396-250047465
chr1	250097103	250139692	-	10	circRNA	ENSSSCT00000045926	17,16,15,14,13,12,11,10,9,8	1:250058264-250097103|1:250139692-250147279
chr1	250119553	250119951	-	2	circRNA	ENSSSCT00000045926	14,13	1:250104857-250119553|1:250119951-250124672
chr1	250307335	250313108	-	3	circRNA	ENSSSCT00000005990	7,6,5	1:250306293-250307335|1:250313108-250315248
chr1	250462713	250488387	-	9	circRNA	ENSSSCT00000065354	14,13,12,11,10,9,8,7,6	1:250453233-250462713|1:250488387-250493449
chr1	250966942	250967638	+	1	circRNA	ENSSSCT00000040771	6	1:250951172-250966942|1:250967638-251036262
chr1	251479230	251482425	-	2	circRNA	ENSSSCT00000006000	8,7	1:251477096-251479230|1:251482425-251486244
chr1	252235840	252269176	-	26	circRNA	ENSSSCT00000006004	37,36,35,34,33,32,31,30,29,28,27,26,25,24,23,22,21,20,19,18,17,16,15,14,13,12	1:252234541-252235840|1:252269176-252271581
chr1	252258784	252260510	-	3	circRNA	ENSSSCT00000006004	22,21,20	1:252257383-252258784|1:252260510-252262211
chr1	252271581	252280307	-	5	circRNA	ENSSSCT00000006004	11,10,9,8,7	1:252269176-252271581|1:252280307-252283413
chr1	252271581	252289498	-	9	circRNA	ENSSSCT00000006004	11,10,9,8,7,6,5,4,3	1:252269176-252271581|1:252289498-252301745
chr1	252859230	252885142	-	3	circRNA	ENSSSCT00000045259	12,11,10	1:252845504-252859230|1:252885142-252887037
chr1	252995230	253000302	-	5	circRNA	ENSSSCT00000063629	11,10,9,8,7	1:252991995-252995230|1:253000302-253012173
chr1	253012173	253014268	-	2	circRNA	ENSSSCT00000063629	6,5	1:253000302-253012173|1:253014268-253024489
chr1	253012173	253038696	-	5	circRNA	ENSSSCT00000047560	7,6,5,4,3	1:253000302-253012173|1:253038696-253056327
chr1	253012173	253056412	-	5	circRNA	ENSSSCT00000063629	6,5,4,3,2	1:253000302-253012173|1:253056412-253092842
chr1	253034154	253038696	-	2	circRNA	ENSSSCT00000047560	4,3	1:253024654-253034154|1:253038696-253056327
chr1	253034154	253056412	-	2	circRNA	ENSSSCT00000063629	3,2	1:253024654-253034154|1:253056412-253092842
chr1	253819152	253822106	-	2	circRNA	ENSSSCT00000031937	21,20	1:253817438-253819152|1:253822106-253826500
chr1	253833226	253845805	-	7	circRNA	ENSSSCT00000031937	13,12,11,10,9,8,7	1:253832483-253833226|1:253845805-253847981
chr1	253845655	253853400	-	5	circRNA	ENSSSCT00000031937	7,6,5,4,3	1:253844574-253845655|1:253853400-253856937
chr1	253847981	253853400	-	4	circRNA	ENSSSCT00000031937	6,5,4,3	1:253845805-253847981|1:253853400-253856937
chr1	253852813	253857053	-	3	circRNA	ENSSSCT00000031937	4,3,2	1:253848479-253852813|1:253857053-253867980
chr1	254954830	254964432	-	6	circRNA	ENSSSCT00000039965	16,15,14,13,12,11	1:254953942-254954830|1:254964432-254965864
chr1	260549829	260564338	-	3	circRNA	ENSSSCT00000025473	15,14,13	1:260544849-260549829|1:260564338-260586641
chr1	260614548	260634517	-	3	circRNA	ENSSSCT00000025473	5,4,3	1:260607330-260614548|1:260634517-260638230
chr1	261142020	261155614	+	6	circRNA	ENSSSCT00000038193	2,3,4,5,6,7	1:261133734-261142020|1:261155614-261163692
chr1	261142020	261169752	+	10	circRNA	ENSSSCT00000038193	2,3,4,5,6,7,8,9,10,11	1:261133734-261142020|1:261169752-261175853
chr1	261200282	261208841	+	6	circRNA	ENSSSCT00000038193	25,26,27,28,29,30	1:261198386-261200282|1:261208841-261209729
chr1	261237315	261246048	-	4	circRNA	ENSSSCT00000050463	5,4,3,2	1:261232428-261237315|1:261246048-261256555
chr1	261388209	261394508	-	5	circRNA	ENSSSCT00000061214	6,5,4,3,2	1:261382184-261388209|1:261394508-261407528
chr1	262470851	262471098	+	1	circRNA	ENSSSCT00000053729	8	1:262468357-262470851|1:262471098-262474625
chr1	263804086	263814895	-	4	circRNA	ENSSSCT00000060389	5,4,3,2	1:263797331-263804086|1:263814895-263821714
chr1	263873073	263916275	+	9	circRNA	ENSSSCT00000064053	2,3,4,5,6,7,8,9,10	1:263847211-263873073|1:263916275-263932774
chr1	263873073	263932949	+	10	circRNA	ENSSSCT00000064053	2,3,4,5,6,7,8,9,10,11	1:263847211-263873073|1:263932949-263936588
chr1	263873073	263940366	+	12	circRNA	ENSSSCT00000064053	2,3,4,5,6,7,8,9,10,11,12,13	1:263847211-263873073|1:263940366-263985597
chr1	263902376	263940366	+	11	circRNA	ENSSSCT00000064053	3,4,5,6,7,8,9,10,11,12,13	1:263873273-263902376|1:263940366-263985597
chr1	263913947	263940366	+	7	circRNA	ENSSSCT00000064053	7,8,9,10,11,12,13	1:263909041-263913947|1:263940366-263985597
chr1	263932774	263940366	+	3	circRNA	ENSSSCT00000064053	11,12,13	1:263916275-263932774|1:263940366-263985597
chr1	263985597	264010385	+	8	circRNA	ENSSSCT00000064053	14,15,16,17,18,19,20,21	1:263940366-263985597|1:264010385-264019072
chr1	264009751	264020783	+	5	circRNA	ENSSSCT00000064053	20,21,22,23,24	1:263997722-264009751|1:264020783-264027021
chr1	264019072	264020783	+	3	circRNA	ENSSSCT00000064053	22,23,24	1:264010385-264019072|1:264020783-264027021
chr1	264046192	264095313	-	11	circRNA	ENSSSCT00000057725	18,17,16,15,14,13,12,11,10,9,8	1:264046096-264046192|1:264095313-264096440
chr1	264455216	264660644	-	10	circRNA	ENSSSCT00000066386	13,12,11,10,9,8,7,6,5,4	1:264371586-264455216|1:264660644-264683711
chr1	264455216	264782210	-	12	circRNA	ENSSSCT00000066386	13,12,11,10,9,8,7,6,5,4,3,2	1:264371586-264455216|1:264782210-264823192
chr1	264546908	264782210	-	8	circRNA	ENSSSCT00000066386	9,8,7,6,5,4,3,2	1:264526341-264546908|1:264782210-264823192
chr1	264644524	264782210	-	4	circRNA	ENSSSCT00000066386	5,4,3,2	1:264571345-264644524|1:264782210-264823192
chr1	265663997	265671376	-	3	circRNA	ENSSSCT00000006155	17,16,15	1:265663868-265663997|1:265671376-265671902
chr1	265671280	265678888	-	5	circRNA	ENSSSCT00000006155	15,14,13,12,11	1:265665308-265671280|1:265678888-265686660
chr1	265729317	265751600	-	5	circRNA	ENSSSCT00000044592	17,16,15,14,13	1:265716660-265729317|1:265751600-265753808
chr1	265920719	265924230	+	2	circRNA	ENSSSCT00000058637	5,6	1:265914606-265920719|1:265924230-265927625
chr1	266189646	266230012	-	3	circRNA	ENSSSCT00000060966	8,7,6	1:266139504-266189646|1:266230012-266296453
chr1	266296453	266312704	-	3	circRNA	ENSSSCT00000060966	5,4,3	1:266230012-266296453|1:266312704-266321643
chr1	266296453	266321713	-	4	circRNA	ENSSSCT00000060966	5,4,3,2	1:266230012-266296453|1:266321713-266345938
chr1	266309589	266312704	-	2	circRNA	ENSSSCT00000060966	4,3	1:266296602-266309589|1:266312704-266321643
chr1	266947328	266999838	+	5	circRNA	ENSSSCT00000051074	2,3,4,5,6	1:266933721-266947328|1:266999838-267028686
chr1	266981814	266999838	+	4	circRNA	ENSSSCT00000051074	3,4,5,6	1:266947451-266981814|1:266999838-267028686
chr1	266981814	267028781	+	5	circRNA	ENSSSCT00000051074	3,4,5,6,7	1:266947451-266981814|1:267028781-267079665
chr1	266986660	266999838	+	3	circRNA	ENSSSCT00000051074	4,5,6	1:266981922-266986660|1:266999838-267028686
chr1	267525105	267545008	+	3	circRNA	ENSSSCT00000006165	2,3,4	1:267480994-267525105|1:267545008-267585976
chr1	268022701	268031046	-	4	circRNA	ENSSSCT00000060150	5,4,3,2	1:268017702-268022701|1:268031046-268065686
chr1	268023892	268023982	-	1	ciRNA	ENSSSCT00000060150	4	1:268022869-268023982
chr1	268956427	268957076	+	3	circRNA	ENSSSCT00000041822	6,7,8	1:268954581-268956427|1:268957076-268958198
chr1	268977337	268978809	+	4	circRNA	ENSSSCT00000048576	28,29,30,31	1:268974187-268977337|1:268978809-268980415
chr1	269145151	269146298	+	2	circRNA	ENSSSCT00000041170	8,9	1:269142398-269145151|1:269146298-269148574
chr1	270096256	270114018	-	4	circRNA	ENSSSCT00000064043	5,4,3,2	1:270074074-270096256|1:270114018-270114105
chr1	270205473	270211454	+	6	circRNA	ENSSSCT00000056593	2,3,4,5,6,7	1:270190677-270205473|1:270211454-270215582
chr1	270874728	270897897	+	7	circRNA	ENSSSCT00000039018	2,3,4,5,6,7,8	1:270763284-270874728|1:270897897-270899687
chr1	270899687	270900268	+	2	circRNA	ENSSSCT00000039018	9,10	1:270897897-270899687|1:270900268-270903043
chr1	271108190	271109313	+	2	circRNA	ENSSSCT00000006280	3,4	1:271107324-271108190|1:271109313-271110494
chr1	271129114	271134394	+	3	circRNA	ENSSSCT00000006280	12,13,14	1:271120458-271129114|1:271134394-271138656
chr1	271146966	271147908	+	3	circRNA	ENSSSCT00000006280	19,20,21	1:271143949-271146966|1:271147908-271156408
chr1	271146966	271175411	+	9	circRNA	ENSSSCT00000006280	19,20,21,22,23,24,25,26,27	1:271143949-271146966|1:271175411-271177713
chr1	271160877	271175411	+	4	circRNA	ENSSSCT00000006280	24,25,26,27	1:271157631-271160877|1:271175411-271177713
chr1	271368899	271377311	+	4	circRNA	ENSSSCT00000055094	2,3,4,5	1:271336995-271368899|1:271377311-271380947
chr1	271368899	271384260	+	8	circRNA	ENSSSCT00000055094	2,3,4,5,6,7,8,9	1:271336995-271368899|1:271384260-271389763
chr1	271380947	271384260	+	4	circRNA	ENSSSCT00000055094	6,7,8,9	1:271377311-271380947|1:271384260-271389763
chr1	271551339	271561877	-	4	circRNA	ENSSSCT00000006289	5,4,3,2	1:271539924-271551339|1:271561877-271564128
chr1	272101948	272138444	-	15	circRNA	ENSSSCT00000006294	24,23,22,21,20,19,18,17,16,15,14,13,12,11,10	1:272096494-272101948|1:272138444-272148317
chr1	272106050	272127308	-	12	circRNA	ENSSSCT00000006294	22,21,20,19,18,17,16,15,14,13,12,11	1:272102683-272106050|1:272127308-272138344
chr1	272138344	272158191	-	6	circRNA	ENSSSCT00000006294	10,9,8,7,6,5	1:272127308-272138344|1:272158191-272160162
chr1	272157971	272162713	-	3	circRNA	ENSSSCT00000006294	5,4,3	1:272156814-272157971|1:272162713-272164823
chr1	272399434	272411645	-	3	circRNA	ENSSSCT00000042871	19,18,17	1:272385558-272399434|1:272411645-272416649
chr1	272579688	272584378	-	4	circRNA	ENSSSCT00000039033	6,5,4,3	1:272571204-272579688|1:272584378-272605038
chr1	273036571	273046921	+	13	circRNA	ENSSSCT00000022734	12,13,14,15,16,17,18,19,20,21,22,23,24	1:273034438-273036571|1:273046921-273050900
chr1	273342080	273347767	-	4	circRNA	ENSSSCT00000006315	9,8,7,6	1:273334575-273342080|1:273347767-273365219
chr1	273343549	273347767	-	3	circRNA	ENSSSCT00000006315	8,7,6	1:273342181-273343549|1:273347767-273365219
chr2	469184	470646	+	3	circRNA	ENSSSCT00000014042	2,3,4	2:464914-469184|2:470646-471764
chr2	594390	606966	+	4	circRNA	ENSSSCT00000014031	2,3,4,5	2:580430-594390|2:606966-610290
chr2	603366	606966	+	3	circRNA	ENSSSCT00000014031	3,4,5	2:594459-603366|2:606966-610290
chr2	610290	612980	+	4	circRNA	ENSSSCT00000014031	6,7,8,9	2:606966-610290|2:612980-614316
chr2	854317	857359	-	5	circRNA	ENSSSCT00000045167	6,5,4,3,2	2:852409-854317|2:857359-864304
chr2	1914656	1921071	+	4	circRNA	ENSSSCT00000053475	12,13,14,15	2:1825610-1914656|2:1921071-1987825
chr2	2076977	2089434	-	6	circRNA	ENSSSCT00000014052	12,11,10,9,8,7	2:2074299-2076977|2:2089434-2090933
chr2	2081187	2089434	-	3	circRNA	ENSSSCT00000014052	9,8,7	2:2079782-2081187|2:2089434-2090933
chr2	2571404	2576539	+	2	circRNA	ENSSSCT00000026062	3,4	2:2532531-2571404|2:2576539-2598568
chr2	2728620	2747132	+	3	circRNA	ENSSSCT00000026062	14,15,16	2:2679780-2728620|2:2747132-2829590
chr2	3092100	3098647	-	5	circRNA	ENSSSCT00000041903	19,18,17,16,15	2:3084833-3092100|2:3098647-3104191
chr2	3096936	3098647	-	3	circRNA	ENSSSCT00000041903	17,16,15	2:3092483-3096936|2:3098647-3104191
chr2	3124712	3126923	-	4	circRNA	ENSSSCT00000041903	5,4,3,2	2:3122194-3124712|2:3126923-3163772
chr2	3222835	3224203	-	3	circRNA	ENSSSCT00000014066	19,18,17	2:3221221-3222835|2:3224203-3226734
chr2	4399827	4442066	-	14	circRNA	ENSSSCT00000052161	22,21,20,19,18,17,16,15,14,13,12,11,10,9	2:4396748-4399827|2:4442066-4449335
chr2	4412501	4416028	-	3	circRNA	ENSSSCT00000052161	18,17,16	2:4408798-4412501|2:4416028-4417633
chr2	4412501	4422440	-	5	circRNA	ENSSSCT00000014085	19,18,17,16,15	2:4408798-4412501|2:4422440-4428978
chr2	4412501	4459058	-	14	circRNA	ENSSSCT00000052161	18,17,16,15,14,13,12,11,10,9,8,7,6,5	2:4408798-4412501|2:4459058-4462595
chr2	4422353	4459058	-	11	circRNA	ENSSSCT00000014085	15,14,13,12,11,10,9,8,7,6,5	2:4417731-4422353|2:4459058-4462595
chr2	4428978	4467704	-	12	circRNA	ENSSSCT00000052161	14,13,12,11,10,9,8,7,6,5,4,3	2:4417731-4428978|2:4467704-4479807
chr2	4431224	4459058	-	9	circRNA	ENSSSCT00000052161	13,12,11,10,9,8,7,6,5	2:4429064-4431224|2:4459058-4462595
chr2	4436086	4459058	-	8	circRNA	ENSSSCT00000052161	12,11,10,9,8,7,6,5	2:4431340-4436086|2:4459058-4462595
chr2	4436086	4479961	-	11	circRNA	ENSSSCT00000052161	12,11,10,9,8,7,6,5,4,3,2	2:4431340-4436086|2:4479961-4523289
chr2	4449335	4459058	-	4	circRNA	ENSSSCT00000052161	8,7,6,5	2:4442066-4449335|2:4459058-4462595
chr2	4449335	4479961	-	7	circRNA	ENSSSCT00000052161	8,7,6,5,4,3,2	2:4442066-4449335|2:4479961-4523289
chr2	4542300	4542904	-	2	circRNA	ENSSSCT00000053598	18,17	2:4534054-4542300|2:4542904-4545015
chr2	4569844	4571734	-	2	circRNA	ENSSSCT00000053598	8,7	2:4565939-4569844|2:4571734-4575748
chr2	4608363	4609706	-	2	circRNA	ENSSSCT00000026471	4,3	2:4590167-4608363|2:4609706-4615481
chr2	4608363	4615679	-	3	circRNA	ENSSSCT00000026471	4,3,2	2:4590167-4608363|2:4615679-4623372
chr2	4608363	4623769	-	4	circRNA	ENSSSCT00000014086	5,4,3,2	2:4590167-4608363|2:4623769-4653741
chr2	4615481	4623769	-	2	circRNA	ENSSSCT00000014086	3,2	2:4609706-4615481|2:4623769-4653741
chr2	4730665	4757312	+	7	circRNA	ENSSSCT00000038627	2,3,4,5,6,7,8	2:4711216-4730665|2:4757312-4763890
chr2	4743316	4752017	+	5	circRNA	ENSSSCT00000051185	4,5,6,7,8	2:4738392-4743316|2:4752017-4757115
chr2	4748454	4749110	+	2	circRNA	ENSSSCT00000038627	4,5	2:4738392-4748454|2:4749110-4751333
chr2	5251034	5251976	-	2	circRNA	ENSSSCT00000022488	16,15	2:5249263-5251034|2:5251976-5253956
chr2	5264449	5264501	-	1	ciRNA	ENSSSCT00000022488	13	2:5254040-5264501
chr2	5264501	5292935	-	10	circRNA	ENSSSCT00000022488	13,12,11,10,9,8,7,6,5,4	2:5254040-5264501|2:5292935-5355481
chr2	5285890	5290605	-	2	circRNA	ENSSSCT00000022488	7,6	2:5280063-5285890|2:5290605-5291534
chr2	5291534	5292935	-	2	circRNA	ENSSSCT00000022488	5,4	2:5290605-5291534|2:5292935-5355481
chr2	5703324	5710905	+	6	circRNA	ENSSSCT00000053798	2,3,4,5,6,7	2:5696103-5703324|2:5710905-5714007
chr2	5782768	5784337	-	2	circRNA	ENSSSCT00000059106	3,2	2:5779494-5782768|2:5784337-5800327
chr2	5826230	5826431	-	1	ciRNA	ENSSSCT00000045051	3	2:5826223-5826431
chr2	6114128	6114797	-	3	circRNA	ENSSSCT00000053578	4,3,2	2:6110860-6114128|2:6114797-6116429
chr2	8374974	8378025	+	4	circRNA	ENSSSCT00000041510	2,3,4,5	2:8361859-8374974|2:8378025-8388247
chr2	8388247	8390219	+	3	circRNA	ENSSSCT00000041510	6,7,8	2:8378025-8388247|2:8390219-8399927
chr2	8947586	8949544	+	5	circRNA	ENSSSCT00000029108	6,7,8,9,10	2:8941810-8947586|2:8949544-8967771
chr2	9037453	9044568	+	10	circRNA	ENSSSCT00000030161	2,3,4,5,6,7,8,9,10,11	2:9035531-9037453|2:9044568-9045623
chr2	9104082	9104824	+	3	circRNA	ENSSSCT00000023479	2,3,4	2:9100776-9104082|2:9104824-9108024
chr2	9621697	9622824	+	4	circRNA	ENSSSCT00000014290	3,4,5,6	2:9621044-9621697|2:9622824-9623909
chr2	9746480	9746687	+	1	ciRNA	ENSSSCT00000014293	9	2:9746480-9746704
chr2	10164858	10165040	-	1	circRNA	ENSSSCT00000014305	5	2:10163692-10164858|2:10165040-10165113
chr2	10831974	10832219	-	1	circRNA	ENSSSCT00000014330	2	2:10830811-10831974|2:10832219-10836969
chr2	10855060	10855252	+	1	ciRNA	ENSSSCT00000014327	6	2:10855060-10855864
chr2	11702122	11712713	-	8	circRNA	ENSSSCT00000053592	11,10,9,8,7,6,5,4	2:11699395-11702122|2:11712713-11721409
chr2	11829947	11835572	+	3	circRNA	ENSSSCT00000014344	2,3,4	2:11828015-11829947|2:11835572-11836117
chr2	11842768	11844194	+	2	circRNA	ENSSSCT00000014344	10,11	2:11839906-11842768|2:11844194-11845377
chr2	11882217	11885704	+	2	circRNA	ENSSSCT00000014345	2,3	2:11876890-11882217|2:11885704-11891120
chr2	11891120	11892382	+	4	circRNA	ENSSSCT00000014345	4,5,6,7	2:11885704-11891120|2:11892382-11899358
chr2	12505805	12509238	-	5	circRNA	ENSSSCT00000014375	7,6,5,4,3	2:12505373-12505805|2:12509238-12525641
chr2	12565203	12565570	+	2	circRNA	ENSSSCT00000031344	6,7	2:12563690-12565203|2:12565570-12581051
chr2	13171136	13179948	-	5	circRNA	ENSSSCT00000037286	8,7,6,5,4	2:13170201-13171136|2:13179948-13180811
chr2	13254591	13255843	-	3	circRNA	ENSSSCT00000036942	10,9,8	2:13253632-13254591|2:13255843-13256840
chr2	13331921	13334236	-	3	circRNA	ENSSSCT00000033188	6,5,4	2:13325996-13331921|2:13334236-13336674
chr2	14561880	14584665	-	13	circRNA	ENSSSCT00000037559	21,20,19,18,17,16,15,14,13,12,11,10,9	2:14557668-14561880|2:14584665-14589416
chr2	14575025	14584665	-	4	circRNA	ENSSSCT00000037559	12,11,10,9	2:14573275-14575025|2:14584665-14589416
chr2	14583384	14584665	-	2	circRNA	ENSSSCT00000037559	10,9	2:14580269-14583384|2:14584665-14589416
chr2	14589416	14602393	-	6	circRNA	ENSSSCT00000022326	8,7,6,5,4,3	2:14589063-14589416|2:14602393-14604719
chr2	14599739	14602393	-	2	circRNA	ENSSSCT00000022326	4,3	2:14597135-14599739|2:14602393-14604719
chr2	14851554	14857630	+	3	circRNA	ENSSSCT00000014443	7,8,9	2:14850435-14851554|2:14857630-14860699
chr2	14901226	14922158	+	13	circRNA	ENSSSCT00000052525	3,4,5,6,7,8,9,10,11,12,13,14,15	2:14897581-14901226|2:14922158-14929687
chr2	14911602	14912714	+	2	circRNA	ENSSSCT00000052525	9,10	2:14908496-14911602|2:14912714-14914042
chr2	14911602	14922158	+	7	circRNA	ENSSSCT00000052525	9,10,11,12,13,14,15	2:14908496-14911602|2:14922158-14929687
chr2	14934511	14941779	+	5	circRNA	ENSSSCT00000038642	3,4,5,6,7	2:14933962-14934511|2:14941779-14948791
chr2	14951584	14958977	+	4	circRNA	ENSSSCT00000038642	9,10,11,12	2:14948945-14951584|2:14958977-14961605
chr2	15090471	15121520	+	3	circRNA	ENSSSCT00000049636	2,3,4	2:15066691-15090471|2:15121520-15132029
chr2	15132029	15144128	+	9	circRNA	ENSSSCT00000039348	2,3,4,5,6,7,8,9,10	2:15066691-15132029|2:15144128-15145121
chr2	15301309	15310546	-	13	circRNA	ENSSSCT00000037910	15,14,13,12,11,10,9,8,7,6,5,4,3	2:15299401-15301309|2:15310546-15311588
chr2	15322374	15323114	-	3	circRNA	ENSSSCT00000045192	7,6,5	2:15317223-15322374|2:15323114-15323855
chr2	15382837	15383068	-	1	ciRNA	ENSSSCT00000052671	1	2:15368760-15383068
chr2	15838941	15839476	+	2	circRNA	ENSSSCT00000056878	2,3	2:15834743-15838941|2:15839476-15845904
chr2	15861766	15862791	-	3	circRNA	ENSSSCT00000042777	15,14,13	2:15861010-15861766|2:15862791-15865554
chr2	15963613	16021491	+	12	circRNA	ENSSSCT00000045828	1,2,3,4,5,6,7,8,9,10,11,12	None|2:16021491-16075109
chr2	15967839	15970677	+	4	circRNA	ENSSSCT00000035985	2,3,4,5	2:15935585-15967839|2:15970677-15972118
chr2	15968764	15970677	+	3	circRNA	ENSSSCT00000035985	3,4,5	2:15968093-15968764|2:15970677-15972118
chr2	15972992	15974446	+	2	circRNA	ENSSSCT00000035985	7,8	2:15972185-15972992|2:15974446-16007195
chr2	16002949	16007375	+	2	circRNA	ENSSSCT00000014486	8,9	2:15974446-16002949|2:16007375-16020375
chr2	16020375	16021491	+	2	circRNA	ENSSSCT00000035985	10,11	2:16007375-16020375|2:16021491-16075109
chr2	16075109	16086983	+	3	circRNA	ENSSSCT00000035985	12,13,14	2:16021491-16075109|2:16086983-16101195
chr2	16085089	16086983	+	2	circRNA	ENSSSCT00000035985	13,14	2:16075220-16085089|2:16086983-16101195
chr2	16143535	16146008	-	5	circRNA	ENSSSCT00000051462	7,6,5,4,3	2:16142455-16143535|2:16146008-16146299
chr2	16190633	16193802	-	5	circRNA	ENSSSCT00000014487	10,9,8,7,6	2:16187374-16190633|2:16193802-16194870
chr2	16347498	16389509	+	5	circRNA	ENSSSCT00000023373	2,3,4,5,6	2:16345922-16347498|2:16389509-16491730
chr2	16373974	16389509	+	4	circRNA	ENSSSCT00000051529	2,3,4,5	2:16344677-16373974|2:16389509-16491730
chr2	16373974	16505030	+	8	circRNA	ENSSSCT00000051529	2,3,4,5,6,7,8,9	2:16344677-16373974|2:16505030-16522153
chr2	18140503	18175827	-	3	circRNA	ENSSSCT00000014505	10,9,8	2:18111423-18140503|2:18175827-18209399
chr2	18470618	18500836	-	5	circRNA	ENSSSCT00000031374	9,8,7,6,5	2:18462951-18470618|2:18500836-18515796
chr2	18482018	18500836	-	3	circRNA	ENSSSCT00000031374	7,6,5	2:18473141-18482018|2:18500836-18515796
chr2	18499950	18515904	-	3	circRNA	ENSSSCT00000031374	6,5,4	2:18482053-18499950|2:18515904-18557180
chr2	18842098	18845963	-	3	circRNA	ENSSSCT00000061124	21,20,19	2:18812643-18842098|2:18845963-18855294
chr2	18855294	18856176	-	2	circRNA	ENSSSCT00000061124	18,17	2:18845963-18855294|2:18856176-18885394
chr2	25013230	25058523	-	2	circRNA	ENSSSCT00000014519	3,2	2:24996601-25013230|2:25058523-25138759
chr2	25835942	25838898	-	2	circRNA	ENSSSCT00000035454	5,4	2:25811996-25835942|2:25838898-25844142
chr2	26018789	26027377	-	3	circRNA	ENSSSCT00000014524	10,9,8	2:26016115-26018789|2:26027377-26039162
chr2	26018789	26060804	-	8	circRNA	ENSSSCT00000014524	10,9,8,7,6,5,4,3	2:26016115-26018789|2:26060804-26078676
chr2	26039162	26041624	-	2	circRNA	ENSSSCT00000014524	7,6	2:26027377-26039162|2:26041624-26049500
chr2	26496797	26519328	-	10	circRNA	ENSSSCT00000044995	11,10,9,8,7,6,5,4,3,2	2:26495060-26496797|2:26519328-26533704
chr2	26502034	26518029	-	8	circRNA	ENSSSCT00000044995	10,9,8,7,6,5,4,3	2:26496905-26502034|2:26518029-26519156
chr2	26510644	26515915	-	3	circRNA	ENSSSCT00000044995	7,6,5	2:26509599-26510644|2:26515915-26516503
chr2	26840087	26857601	-	13	circRNA	ENSSSCT00000063553	15,14,13,12,11,10,9,8,7,6,5,4,3	2:26836408-26840087|2:26857601-26874433
chr2	26845792	26852252	-	7	circRNA	ENSSSCT00000063553	11,10,9,8,7,6,5	2:26842467-26845792|2:26852252-26857359
chr2	26851838	26852252	-	2	circRNA	ENSSSCT00000063553	6,5	2:26848995-26851838|2:26852252-26857359
chr2	26851838	26857601	-	4	circRNA	ENSSSCT00000063553	6,5,4,3	2:26848995-26851838|2:26857601-26874433
chr2	26857359	26857601	-	2	circRNA	ENSSSCT00000063553	4,3	2:26852252-26857359|2:26857601-26874433
chr2	27587087	27589108	-	6	circRNA	ENSSSCT00000014538	14,13,12,11,10,9	2:27586046-27587087|2:27589108-27592299
chr2	27649121	27650223	-	1	circRNA	ENSSSCT00000014538	2	2:27609691-27649121|2:27650223-27684465
chr2	27885605	27899766	-	3	circRNA	ENSSSCT00000051933	4,3,2	2:27884350-27885605|2:27899766-27902791
chr2	27962401	27976384	-	7	circRNA	ENSSSCT00000025799	10,9,8,7,6,5,4	2:27960100-27962401|2:27976384-27989713
chr2	27969513	27993406	-	6	circRNA	ENSSSCT00000025799	8,7,6,5,4,3	2:27965873-27969513|2:27993406-28004038
chr2	27989713	27993406	-	1	circRNA	ENSSSCT00000025799	3	2:27976384-27989713|2:27993406-28004038
chr2	27989713	28004151	-	3	circRNA	ENSSSCT00000061207	4,3,2	2:27976384-27989713|2:28004151-28041146
chr2	29279513	29285842	+	3	circRNA	ENSSSCT00000048218	3,4,5	2:29249100-29279513|2:29285842-29304800
chr2	29550703	29624363	+	11	circRNA	ENSSSCT00000014553	10,11,12,13,14,15,16,17,18,19,20	2:29460724-29550703|2:29624363-29702014
chr2	30300718	30304214	-	2	circRNA	ENSSSCT00000043056	3,2	2:30298907-30300718|2:30304214-30311445
chr2	32929066	32949825	+	3	circRNA	ENSSSCT00000014563	2,3,4	2:32872582-32929066|2:32949825-32959334
chr2	32947470	32963491	+	7	circRNA	ENSSSCT00000014563	3,4,5,6,7,8,9	2:32929138-32947470|2:32963491-32964064
chr2	40640775	40653859	+	5	circRNA	ENSSSCT00000014593	4,5,6,7,8	2:40628026-40640775|2:40653859-40663604
chr2	40819037	40820292	-	2	circRNA	ENSSSCT00000062740	4,3	2:40818287-40819037|2:40820292-40822859
chr2	40870650	40882823	-	6	circRNA	ENSSSCT00000014599	11,10,9,8,7,6	2:40865407-40870650|2:40882823-40884643
chr2	41118634	41142313	+	7	circRNA	ENSSSCT00000052530	2,3,4,5,6,7,8	2:41105975-41118634|2:41142313-41169882
chr2	41790145	41794020	-	6	circRNA	ENSSSCT00000014614	10,9,8,7,6,5	2:41783428-41790145|2:41794020-41802145
chr2	41967830	41977434	+	3	circRNA	ENSSSCT00000024535	6,7,8	2:41966417-41967830|2:41977434-41979893
chr2	41990792	42004087	+	10	circRNA	ENSSSCT00000024535	14,15,16,17,18,19,20,21,22,23	2:41983962-41990792|2:42004087-42006832
chr2	41994588	41995338	+	2	circRNA	ENSSSCT00000024535	17,18	2:41991832-41994588|2:41995338-41996289
chr2	41996289	41996912	+	2	circRNA	ENSSSCT00000024535	19,20	2:41995338-41996289|2:41996912-42000651
chr2	42009676	42012054	+	3	circRNA	ENSSSCT00000024535	25,26,27	2:42006969-42009676|2:42012054-42015141
chr2	42015141	42019626	+	6	circRNA	ENSSSCT00000024535	28,29,30,31,32,33	2:42012054-42015141|2:42019626-42022026
chr2	44943646	44945046	+	3	circRNA	ENSSSCT00000041686	2,3,4	2:44890526-44943646|2:44945046-44957570
chr2	45538588	45568049	-	9	circRNA	ENSSSCT00000039737	11,10,9,8,7,6,5,4,3	2:45536397-45538588|2:45568049-45576975
chr2	45905068	45938482	-	12	circRNA	ENSSSCT00000043425	13,12,11,10,9,8,7,6,5,4,3,2	2:45902271-45905068|2:45938482-45941390
chr2	45934501	45938482	-	4	circRNA	ENSSSCT00000043425	5,4,3,2	2:45929072-45934501|2:45938482-45941390
chr2	46576743	46576999	-	1	circRNA	ENSSSCT00000052764	2	2:46472486-46576743|2:46576999-46593028
chr2	46872408	46910236	-	9	circRNA	ENSSSCT00000056665	10,9,8,7,6,5,4,3,2	2:46867358-46872408|2:46910236-47027788
chr2	46906648	46910236	-	3	circRNA	ENSSSCT00000056665	4,3,2	2:46892685-46906648|2:46910236-47027788
chr2	47170672	47171374	-	2	circRNA	ENSSSCT00000014639	16,15	2:47160652-47170672|2:47171374-47172570
chr2	47469412	47491725	-	9	circRNA	ENSSSCT00000014642	19,18,17,16,15,14,13,12,11	2:47467306-47469412|2:47491725-47494047
chr2	47473091	47494398	-	10	circRNA	ENSSSCT00000014642	18,17,16,15,14,13,12,11,10,9	2:47469532-47473091|2:47494398-47511192
chr2	47475558	47494398	-	9	circRNA	ENSSSCT00000014642	17,16,15,14,13,12,11,10,9	2:47473207-47475558|2:47494398-47511192
chr2	47486152	47489786	-	4	circRNA	ENSSSCT00000014642	15,14,13,12	2:47485248-47486152|2:47489786-47491557
chr2	47486152	47491725	-	5	circRNA	ENSSSCT00000014642	15,14,13,12,11	2:47485248-47486152|2:47491725-47494047
chr2	47511192	47530845	-	7	circRNA	ENSSSCT00000014642	8,7,6,5,4,3,2	2:47494398-47511192|2:47530845-47582566
chr2	48160221	48176558	+	3	circRNA	ENSSSCT00000014643	7,8,9	2:48124785-48160221|2:48176558-48213139
chr2	48668539	48669386	+	2	circRNA	ENSSSCT00000014645	2,3	2:48668215-48668539|2:48669386-48670247
chr2	48670247	48676224	+	15	circRNA	ENSSSCT00000014645	4,5,6,7,8,9,10,11,12,13,14,15,16,17,18	2:48669386-48670247|2:48676224-48676381
chr2	48671220	48673375	+	8	circRNA	ENSSSCT00000014645	5,6,7,8,9,10,11,12	2:48670350-48671220|2:48673375-48674024
chr2	48999101	49002684	+	2	circRNA	ENSSSCT00000056232	2,3	2:48985899-48999101|2:49002684-49015138
chr2	49499792	49530571	+	10	circRNA	ENSSSCT00000051649	7,8,9,10,11,12,13,14,15,16	2:49480738-49499792|2:49530571-49569416
chr2	49613742	49686028	+	22	circRNA	ENSSSCT00000051649	18,19,20,21,22,23,24,25,26,27,28,29,30,31,32,33,34,35,36,37,38,39	2:49569485-49613742|2:49686028-49688915
chr2	49625095	49626220	+	2	circRNA	ENSSSCT00000051649	23,24	2:49621358-49625095|2:49626220-49628943
chr2	49722821	49759956	-	9	circRNA	ENSSSCT00000014650	11,10,9,8,7,6,5,4,3	2:49722298-49722821|2:49759956-49779890
chr2	49743303	49747348	-	3	circRNA	ENSSSCT00000014650	6,5,4	2:49740392-49743303|2:49747348-49759782
chr2	50877352	50886317	+	2	circRNA	ENSSSCT00000015274	3,4	2:50831660-50877352|2:50886317-50917812
chr2	57281304	57282142	+	2	circRNA	ENSSSCT00000022602	2,3	2:57280387-57281304|2:57282142-57282375
chr2	58456861	58478376	-	2	circRNA	ENSSSCT00000015224	3,2	2:58431355-58456861|2:58478376-58516991
chr2	59261729	59262716	+	2	circRNA	ENSSSCT00000039332	5,6	2:59261289-59261729|2:59262716-59266064
chr2	59330201	59339965	+	4	circRNA	ENSSSCT00000041528	2,3,4,5	2:59277342-59330201|2:59339965-59343628
chr2	59336519	59337143	+	2	circRNA	ENSSSCT00000041528	3,4	2:59330249-59336519|2:59337143-59339690
chr2	59680627	59681693	-	4	circRNA	ENSSSCT00000051791	5,4,3,2	2:59679635-59680627|2:59681693-59684200
chr2	59822794	59827076	-	2	circRNA	ENSSSCT00000048131	3,2	2:59822211-59822794|2:59827076-59828335
chr2	60179897	60180750	-	2	circRNA	ENSSSCT00000060236	3,2	2:60177573-60179897|2:60180750-60184097
chr2	60192312	60192904	-	2	circRNA	ENSSSCT00000058611	4,3	2:60187913-60192312|2:60192904-60193605
chr2	60466632	60468872	-	3	circRNA	ENSSSCT00000037430	25,24,23	2:60464492-60466632|2:60468872-60469588
chr2	60487006	60497356	-	6	circRNA	ENSSSCT00000037430	11,10,9,8,7,6	2:60486520-60487006|2:60497356-60502167
chr2	60489988	60497356	-	5	circRNA	ENSSSCT00000037430	10,9,8,7,6	2:60487148-60489988|2:60497356-60502167
chr2	60497226	60503198	-	4	circRNA	ENSSSCT00000037430	6,5,4,3	2:60495479-60497226|2:60503198-60512087
chr2	60502167	60503198	-	3	circRNA	ENSSSCT00000037430	5,4,3	2:60497356-60502167|2:60503198-60512087
chr2	60778916	60783315	-	2	circRNA	ENSSSCT00000061167	5,4	2:60771352-60778916|2:60783315-60789685
chr2	61041206	61043020	+	2	circRNA	ENSSSCT00000015140	3,4	2:61038752-61041206|2:61043020-61053855
chr2	61095628	61099541	-	2	circRNA	ENSSSCT00000059218	3,2	2:61091248-61095628|2:61099541-61105033
chr2	61181540	61201817	+	8	circRNA	ENSSSCT00000015136	9,10,11,12,13,14,15,16	2:61177793-61181540|2:61201817-61207154
chr2	61186309	61192433	+	4	circRNA	ENSSSCT00000015136	10,11,12,13	2:61181774-61186309|2:61192433-61199098
chr2	61207154	61209996	+	3	circRNA	ENSSSCT00000015136	17,18,19	2:61201817-61207154|2:61209996-61214934
chr2	61358356	61374587	-	6	circRNA	ENSSSCT00000015135	10,9,8,7,6,5	2:61357485-61358356|2:61374587-61375998
chr2	62008284	62053252	-	1	ciRNA	ENSSSCT00000056302	5	2:62008204-62053252
chr2	62231963	62235780	+	3	circRNA	ENSSSCT00000015115	9,10,11	2:62230097-62231963|2:62235780-62236225
chr2	62307778	62308097	+	1	circRNA	ENSSSCT00000027972	2	2:62251700-62307778|2:62308097-62312199
chr2	62307778	62312337	+	2	circRNA	ENSSSCT00000027972	2,3	2:62251700-62307778|2:62312337-62313621
chr2	62307778	62313757	+	3	circRNA	ENSSSCT00000027972	2,3,4	2:62251700-62307778|2:62313757-62316078
chr2	62307778	62318351	+	6	circRNA	ENSSSCT00000027972	2,3,4,5,6,7	2:62251700-62307778|2:62318351-62324764
chr2	62324764	62327557	+	4	circRNA	ENSSSCT00000027972	8,9,10,11	2:62318351-62324764|2:62327557-62337178
chr2	62389730	62392801	+	2	circRNA	ENSSSCT00000029966	28,29	2:62388573-62389730|2:62392801-62395071
chr2	62448719	62450865	-	4	circRNA	ENSSSCT00000015107	7,6,5,4	2:62448443-62448719|2:62450865-62451045
chr2	63868696	63875798	+	8	circRNA	ENSSSCT00000060533	5,6,7,8,9,10,11,12	2:63862039-63868696|2:63875798-63889451
chr2	64804590	64804838	-	2	circRNA	ENSSSCT00000041298	15,14	2:64802859-64804590|2:64804838-64804913
chr2	64857304	64858129	-	2	circRNA	ENSSSCT00000015050	4,3	2:64851725-64857304|2:64858129-64858640
chr2	65975068	65980624	-	5	circRNA	ENSSSCT00000044397	6,5,4,3,2	2:65972300-65975068|2:65980624-66028178
chr2	65978291	65980624	-	4	circRNA	ENSSSCT00000044397	5,4,3,2	2:65975191-65978291|2:65980624-66028178
chr2	66272926	66273948	+	3	circRNA	ENSSSCT00000065149	3,4,5	2:66271613-66272926|2:66273948-66277510
chr2	66331347	66341023	+	12	circRNA	ENSSSCT00000014994	3,4,5,6,7,8,9,10,11,12,13,14	2:66330929-66331347|2:66341023-66342881
chr2	67883950	67886169	-	4	circRNA	ENSSSCT00000041592	7,6,5,4	2:67883434-67883950|2:67886169-67894875
chr2	68861531	68861892	-	2	circRNA	ENSSSCT00000014931	8,7	2:68860006-68861531|2:68861892-68863930
chr2	69343241	69344890	-	3	circRNA	ENSSSCT00000031515	11,10,9	2:69341712-69343241|2:69344890-69347794
chr2	69351604	69352046	-	2	circRNA	ENSSSCT00000031515	3,2	2:69349154-69351604|2:69352046-69353749
chr2	69393682	69395480	+	6	circRNA	ENSSSCT00000055359	15,16,17,18,19,20	2:69392836-69393682|2:69395480-69396802
chr2	69427147	69427731	+	2	circRNA	ENSSSCT00000034746	3,4	2:69425625-69427147|2:69427731-69430669
chr2	69538353	69543345	+	4	circRNA	ENSSSCT00000060743	8,9,10,11	2:69535769-69538353|2:69543345-69545744
chr2	69540228	69542050	+	1	ciRNA	ENSSSCT00000039073	9	2:69540228-69542137
chr2	69540228	69542054	+	1	ciRNA	ENSSSCT00000039073	9	2:69540228-69542137
chr2	69540228	69542062	+	1	ciRNA	ENSSSCT00000039073	9	2:69540228-69542137
chr2	69841383	69841770	+	1	circRNA	ENSSSCT00000029210	4	2:69840446-69841383|2:69841770-69845875
chr2	69853255	69853745	+	2	circRNA	ENSSSCT00000029210	9,10	2:69850496-69853255|2:69853745-69854700
chr2	70829262	70846887	-	7	circRNA	ENSSSCT00000042597	8,7,6,5,4,3,2	2:70827900-70829262|2:70846887-70858658
chr2	71668477	71669624	-	2	circRNA	ENSSSCT00000045787	16,15	2:71666073-71668477|2:71669624-71671218
chr2	71882376	71882698	+	1	circRNA	ENSSSCT00000014815	3	2:71815418-71882376|2:71882698-71890697
chr2	71894943	71910475	+	6	circRNA	ENSSSCT00000014815	7,8,9,10,11,12	2:71893507-71894943|2:71910475-71911991
chr2	71910200	71912131	+	2	circRNA	ENSSSCT00000014815	12,13	2:71904855-71910200|2:71912131-71919788
chr2	71919788	71922125	+	2	circRNA	ENSSSCT00000014815	14,15	2:71912131-71919788|2:71922125-71923445
chr2	72336163	72337754	-	2	circRNA	ENSSSCT00000039776	24,23	2:72330470-72336163|2:72337754-72342886
chr2	72451894	72452340	+	2	circRNA	ENSSSCT00000014800	20,21	2:72445232-72451894|2:72452340-72455486
chr2	73085599	73104003	+	5	circRNA	ENSSSCT00000041390	2,3,4,5,6	2:73063141-73085599|2:73104003-73109196
chr2	73110131	73119391	+	8	circRNA	ENSSSCT00000041390	8,9,10,11,12,13,14,15	2:73109262-73110131|2:73119391-73121049
chr2	73339905	73352014	+	9	circRNA	ENSSSCT00000014770	3,4,5,6,7,8,9,10,11	2:73336151-73339905|2:73352014-73357031
chr2	73829181	73837640	-	3	circRNA	ENSSSCT00000025153	6,5,4	2:73808185-73829181|2:73837640-73841766
chr2	73829181	73841932	-	4	circRNA	ENSSSCT00000025153	6,5,4,3	2:73808185-73829181|2:73841932-73852584
chr2	73829181	73852681	-	5	circRNA	ENSSSCT00000025153	6,5,4,3,2	2:73808185-73829181|2:73852681-73889750
chr2	73836405	73852681	-	4	circRNA	ENSSSCT00000025153	5,4,3,2	2:73829375-73836405|2:73852681-73889750
chr2	73841766	73852681	-	2	circRNA	ENSSSCT00000025153	3,2	2:73837640-73841766|2:73852681-73889750
chr2	73841766	73858570	-	3	circRNA	ENSSSCT00000026522	4,3,2	2:73837640-73841766|2:73858570-73889750
chr2	74747713	74750124	+	5	circRNA	ENSSSCT00000054231	2,3,4,5,6	2:74746691-74747713|2:74750124-74750802
chr2	76239253	76239858	-	1	ciRNA	ENSSSCT00000044499	4	2:76239249-76239858
chr2	76365623	76370837	+	5	circRNA	ENSSSCT00000060555	3,4,5,6,7	2:76353693-76365623|2:76370837-76377799
chr2	76582776	76583208	-	1	circRNA	ENSSSCT00000014689	2	2:76576883-76582776|2:76583208-76609340
chr2	77377825	77379918	-	4	circRNA	ENSSSCT00000041973	6,5,4,3	2:77376992-77377825|2:77379918-77380805
chr2	77379616	77380927	-	3	circRNA	ENSSSCT00000041973	4,3,2	2:77378193-77379616|2:77380927-77385438
chr2	77554560	77555280	-	1	ciRNA	ENSSSCT00000050778	10	2:77554247-77555280
chr2	77554578	77555280	-	1	ciRNA	ENSSSCT00000050778	10	2:77554247-77555280
chr2	78364932	78370930	+	3	circRNA	ENSSSCT00000015303	4,5,6	2:78353390-78364932|2:78370930-78380147
chr2	78462666	78464431	+	3	circRNA	ENSSSCT00000015304	2,3,4	2:78426490-78462666|2:78464431-78471384
chr2	78552636	78622364	+	6	circRNA	ENSSSCT00000015306	2,3,4,5,6,7	2:78516379-78552636|2:78622364-78625844
chr2	78831920	78834612	-	2	circRNA	ENSSSCT00000015314	4,3	2:78821930-78831920|2:78834612-78839329
chr2	78886397	78895724	-	9	circRNA	ENSSSCT00000041740	11,10,9,8,7,6,5,4,3	2:78885044-78886397|2:78895724-78896604
chr2	78886397	78896781	-	10	circRNA	ENSSSCT00000041740	11,10,9,8,7,6,5,4,3,2	2:78885044-78886397|2:78896781-78915645
chr2	78889167	78896781	-	8	circRNA	ENSSSCT00000041740	9,8,7,6,5,4,3,2	2:78887909-78889167|2:78896781-78915645
chr2	78889900	78893995	-	4	circRNA	ENSSSCT00000041740	8,7,6,5	2:78889324-78889900|2:78893995-78894698
chr2	78892189	78893995	-	3	circRNA	ENSSSCT00000041740	7,6,5	2:78890014-78892189|2:78893995-78894698
chr2	78894698	78896781	-	3	circRNA	ENSSSCT00000041740	4,3,2	2:78893995-78894698|2:78896781-78915645
chr2	78981929	78992552	-	5	circRNA	ENSSSCT00000059445	14,13,12,11,10	2:78978926-78981929|2:78992552-78993621
chr2	78994800	78999927	-	3	circRNA	ENSSSCT00000059445	8,7,6	2:78993738-78994800|2:78999927-79002337
chr2	79008268	79010277	-	2	circRNA	ENSSSCT00000059445	4,3	2:79002399-79008268|2:79010277-79014678
chr2	80188746	80191412	-	2	circRNA	ENSSSCT00000046549	6,5	2:80188069-80188746|2:80191412-80191595
chr2	80667697	80807643	-	20	circRNA	ENSSSCT00000015341	22,21,20,19,18,17,16,15,14,13,12,11,10,9,8,7,6,5,4,3	2:80660984-80667697|2:80807643-80808773
chr2	80698193	80704603	-	4	circRNA	ENSSSCT00000061395	12,11,10,9	2:80691558-80698193|2:80704603-80711393
chr2	80698193	80713361	-	6	circRNA	ENSSSCT00000061395	12,11,10,9,8,7	2:80691558-80698193|2:80713361-80715194
chr2	80702171	80715319	-	6	circRNA	ENSSSCT00000061395	11,10,9,8,7,6	2:80698317-80702171|2:80715319-80731219
chr2	80711393	80748514	-	6	circRNA	ENSSSCT00000061395	8,7,6,5,4,3	2:80704603-80711393|2:80748514-80806699
chr2	80731219	80735864	-	2	circRNA	ENSSSCT00000061395	5,4	2:80715319-80731219|2:80735864-80748378
chr2	80731219	80748514	-	3	circRNA	ENSSSCT00000061395	5,4,3	2:80715319-80731219|2:80748514-80806699
chr2	80929267	80985315	+	8	circRNA	ENSSSCT00000047859	2,3,4,5,6,7,8,9	2:80895805-80929267|2:80985315-80992134
chr2	80965491	80992288	+	7	circRNA	ENSSSCT00000047859	4,5,6,7,8,9,10	2:80943020-80965491|2:80992288-81025183
chr2	80967000	81029986	+	8	circRNA	ENSSSCT00000047859	6,7,8,9,10,11,12,13	2:80966686-80967000|2:81029986-81034486
chr2	80978748	80985315	+	2	circRNA	ENSSSCT00000047859	8,9	2:80975826-80978748|2:80985315-80992134
chr2	80985214	80992288	+	2	circRNA	ENSSSCT00000047859	9,10	2:80978825-80985214|2:80992288-81025183
chr2	81025183	81029986	+	3	circRNA	ENSSSCT00000047859	11,12,13	2:80992288-81025183|2:81029986-81034486
chr2	81414129	81415989	-	2	circRNA	ENSSSCT00000015356	10,9	2:81412768-81414129|2:81415989-81418630
chr2	81414129	81431978	-	8	circRNA	ENSSSCT00000015356	10,9,8,7,6,5,4,3	2:81412768-81414129|2:81431978-81454145
chr2	81478601	81479033	+	2	circRNA	ENSSSCT00000015357	3,4	2:81471239-81478601|2:81479033-81480823
chr2	82117896	82137277	+	4	circRNA	ENSSSCT00000026067	2,3,4,5	2:82101479-82117896|2:82137277-82161060
chr2	82132066	82154001	+	4	circRNA	ENSSSCT00000041247	3,4,5,6	2:82117988-82132066|2:82154001-82161060
chr2	82132066	82161993	+	5	circRNA	ENSSSCT00000026067	3,4,5,6,7	2:82117988-82132066|2:82161993-82186988
chr2	82153896	82161993	+	3	circRNA	ENSSSCT00000041247	6,7,8	2:82137277-82153896|2:82161993-82186988
chr2	82200379	82200981	+	2	circRNA	ENSSSCT00000026067	11,12	2:82192417-82200379|2:82200981-82202980
chr2	82200379	82203416	+	4	circRNA	ENSSSCT00000026067	11,12,13,14	2:82192417-82200379|2:82203416-82207367
chr2	82200379	82207407	+	5	circRNA	ENSSSCT00000026067	11,12,13,14,15	2:82192417-82200379|2:82207407-82210091
chr2	82665141	82665770	+	2	circRNA	ENSSSCT00000015371	4,5	2:82662461-82665141|2:82665770-82667026
chr2	82729734	82730090	+	2	circRNA	ENSSSCT00000015368	11,12	2:82729126-82729734|2:82730090-82731284
chr2	82982338	82987046	+	2	circRNA	ENSSSCT00000044843	10,11	2:82943497-82982338|2:82987046-82992975
chr2	83015768	83023841	+	6	circRNA	ENSSSCT00000044843	17,18,19,20,21,22	2:83006814-83015768|2:83023841-83029752
chr2	83021037	83043044	+	7	circRNA	ENSSSCT00000044843	21,22,23,24,25,26,27	2:83019778-83021037|2:83043044-83044406
chr2	84386660	84387147	+	2	circRNA	ENSSSCT00000015381	3,4	2:84385321-84386660|2:84387147-84388573
chr2	84428565	84432962	-	3	circRNA	ENSSSCT00000026755	16,15,14	2:84421133-84428565|2:84432962-84439769
chr2	84670565	84682779	+	4	circRNA	ENSSSCT00000015384	10,11,12,13	2:84664044-84670565|2:84682779-84686043
chr2	84678487	84682779	+	2	circRNA	ENSSSCT00000015384	12,13	2:84673714-84678487|2:84682779-84686043
chr2	85478378	85507342	+	6	circRNA	ENSSSCT00000015388	5,6,7,8,9,10	2:85474264-85478378|2:85507342-85511776
chr2	85478378	85518807	+	8	circRNA	ENSSSCT00000015388	5,6,7,8,9,10,11,12	2:85474264-85478378|2:85518807-85529433
chr2	85494520	85518807	+	7	circRNA	ENSSSCT00000015388	6,7,8,9,10,11,12	2:85478455-85494520|2:85518807-85529433
chr2	85507178	85518807	+	3	circRNA	ENSSSCT00000015388	10,11,12	2:85500502-85507178|2:85518807-85529433
chr2	85592635	85594353	+	3	circRNA	ENSSSCT00000015388	25,26,27	2:85589655-85592635|2:85594353-85597416
chr2	85593128	85617372	+	6	circRNA	ENSSSCT00000015388	26,27,28,29,30,31	2:85592776-85593128|2:85617372-85620191
chr2	85594120	85597549	+	2	circRNA	ENSSSCT00000015388	27,28	2:85593213-85594120|2:85597549-85604335
chr2	85594120	85604438	+	3	circRNA	ENSSSCT00000015388	27,28,29	2:85593213-85594120|2:85604438-85605898
chr2	85895663	85901430	+	4	circRNA	ENSSSCT00000015395	2,3,4,5	2:85891038-85895663|2:85901430-85916903
chr2	86217809	86233721	+	5	circRNA	ENSSSCT00000038239	7,8,9,10,11	2:86212534-86217809|2:86233721-86299505
chr2	86225516	86233721	+	4	circRNA	ENSSSCT00000038239	8,9,10,11	2:86217898-86225516|2:86233721-86299505
chr2	86340120	86356670	-	3	circRNA	ENSSSCT00000015400	8,7,6	2:86334635-86340120|2:86356670-86360441
chr2	86944961	87068801	-	19	circRNA	ENSSSCT00000061850	22,21,20,19,18,17,16,15,14,13,12,11,10,9,8,7,6,5,4	2:86910939-86944961|2:87068801-87088415
chr2	86954800	86977217	-	6	circRNA	ENSSSCT00000061850	21,20,19,18,17,16	2:86945068-86954800|2:86977217-86992618
chr2	87254644	87264182	+	4	circRNA	ENSSSCT00000054996	3,4,5,6	2:87232280-87254644|2:87264182-87282761
chr2	87254644	87286479	+	6	circRNA	ENSSSCT00000054996	3,4,5,6,7,8	2:87232280-87254644|2:87286479-87310676
chr2	87679683	87746010	-	3	circRNA	ENSSSCT00000052892	10,9,8	2:87619199-87679683|2:87746010-87754927
chr2	87745802	87760449	-	3	circRNA	ENSSSCT00000052892	8,7,6	2:87694884-87745802|2:87760449-87777933
chr2	87754927	87760449	-	2	circRNA	ENSSSCT00000052892	7,6	2:87746010-87754927|2:87760449-87777933
chr2	88043810	88088692	+	9	circRNA	ENSSSCT00000056382	2,3,4,5,6,7,8,9,10	2:88024403-88043810|2:88088692-88092943
chr2	88057794	88070008	+	5	circRNA	ENSSSCT00000015415	2,3,4,5,6	2:88024403-88057794|2:88070008-88085442
chr2	88062484	88070008	+	4	circRNA	ENSSSCT00000015415	3,4,5,6	2:88057945-88062484|2:88070008-88085442
chr2	88184109	88206327	-	4	circRNA	ENSSSCT00000015416	5,4,3,2	2:88147594-88184109|2:88206327-88248006
chr2	88334350	88338133	+	3	circRNA	ENSSSCT00000057835	3,4,5	2:88328885-88334350|2:88338133-88354416
chr2	88358553	88360045	+	3	circRNA	ENSSSCT00000057835	9,10,11	2:88356194-88358553|2:88360045-88364592
chr2	88358553	88364636	+	4	circRNA	ENSSSCT00000057835	9,10,11,12	2:88356194-88358553|2:88364636-88372254
chr2	88364592	88372391	+	2	circRNA	ENSSSCT00000057835	12,13	2:88360045-88364592|2:88372391-88382387
chr2	89061669	89065183	+	2	circRNA	ENSSSCT00000024491	2,3	2:89045478-89061669|2:89065183-89067800
chr2	89067800	89098329	+	12	circRNA	ENSSSCT00000024491	4,5,6,7,8,9,10,11,12,13,14,15	2:89065183-89067800|2:89098329-89099670
chr2	89079717	89099776	+	9	circRNA	ENSSSCT00000024491	8,9,10,11,12,13,14,15,16	2:89076809-89079717|2:89099776-89100882
chr2	89119408	89129740	+	4	circRNA	ENSSSCT00000029158	2,3,4,5	2:89112521-89119408|2:89129740-89141973
chr2	89242111	89245663	-	2	circRNA	ENSSSCT00000053472	5,4	2:89231916-89242111|2:89245663-89251884
chr2	89312693	89350868	+	5	circRNA	ENSSSCT00000044915	9,10,11,12,13	2:89278885-89312693|2:89350868-89359612
chr2	89323269	89350868	+	3	circRNA	ENSSSCT00000044915	11,12,13	2:89316663-89323269|2:89350868-89359612
chr2	89323269	89377048	+	8	circRNA	ENSSSCT00000044915	11,12,13,14,15,16,17,18	2:89316663-89323269|2:89377048-89384252
chr2	89323269	89413823	+	10	circRNA	ENSSSCT00000044915	11,12,13,14,15,16,17,18,19,20	2:89316663-89323269|2:89413823-89434597
chr2	89323269	89434784	+	11	circRNA	ENSSSCT00000044915	11,12,13,14,15,16,17,18,19,20,21	2:89316663-89323269|2:89434784-89440549
chr2	89359612	89384364	+	6	circRNA	ENSSSCT00000044915	14,15,16,17,18,19	2:89350868-89359612|2:89384364-89413665
chr2	89359612	89413823	+	7	circRNA	ENSSSCT00000044915	14,15,16,17,18,19,20	2:89350868-89359612|2:89413823-89434597
chr2	89659826	89693109	+	7	circRNA	ENSSSCT00000050250	11,12,13,14,15,16,17	2:89652692-89659826|2:89693109-89696285
chr2	89659826	89696375	+	8	circRNA	ENSSSCT00000050250	11,12,13,14,15,16,17,18	2:89652692-89659826|2:89696375-89746050
chr2	89683591	89696375	+	4	circRNA	ENSSSCT00000050250	15,16,17,18	2:89675065-89683591|2:89696375-89746050
chr2	89692983	89746157	+	3	circRNA	ENSSSCT00000015431	17,18,19	2:89685136-89692983|2:89746157-89760625
chr2	89968731	89993025	-	5	circRNA	ENSSSCT00000039349	14,13,12,11,10	2:89961478-89968731|2:89993025-89998963
chr2	89968731	90017147	-	9	circRNA	ENSSSCT00000039349	14,13,12,11,10,9,8,7,6	2:89961478-89968731|2:90017147-90040766
chr2	89968731	90175391	-	13	circRNA	ENSSSCT00000039349	14,13,12,11,10,9,8,7,6,5,4,3,2	2:89961478-89968731|2:90175391-90262965
chr2	89992976	90017147	-	5	circRNA	ENSSSCT00000039349	10,9,8,7,6	2:89977904-89992976|2:90017147-90040766
chr2	89992976	90040856	-	6	circRNA	ENSSSCT00000039349	10,9,8,7,6,5	2:89977904-89992976|2:90040856-90151612
chr2	90580650	90594124	+	2	circRNA	ENSSSCT00000024808	4,5	2:90499248-90580650|2:90594124-90662755
chr2	90706620	90709091	+	3	circRNA	ENSSSCT00000015436	2,3,4	2:90697762-90706620|2:90709091-90714796
chr2	91455399	91465447	+	3	circRNA	ENSSSCT00000043338	4,5,6	2:91391360-91455399|2:91465447-91510739
chr2	91768019	91773257	+	1	circRNA	ENSSSCT00000015440	9	2:91749304-91768019|2:91773257-91776796
chr2	91768019	91784772	+	5	circRNA	ENSSSCT00000015440	9,10,11,12,13	2:91749304-91768019|2:91784772-91803962
chr2	95626620	95637462	-	6	circRNA	ENSSSCT00000015452	12,11,10,9,8,7	2:95579459-95626620|2:95637462-95637884
chr2	96152765	96165180	-	3	circRNA	ENSSSCT00000061557	6,5,4	2:96136081-96152765|2:96165180-96199361
chr2	101352603	101353765	+	2	circRNA	ENSSSCT00000015472	12,13	2:101343390-101352603|2:101353765-101359645
chr2	102132820	102137046	-	5	circRNA	ENSSSCT00000063761	14,13,12,11,10	2:102132181-102132820|2:102137046-102144322
chr2	102340466	102358598	+	4	circRNA	ENSSSCT00000024526	3,4,5,6	2:102335776-102340466|2:102358598-102367523
chr2	102358232	102367636	+	2	circRNA	ENSSSCT00000024526	6,7	2:102355243-102358232|2:102367636-102372654
chr2	102535640	102536007	-	2	circRNA	ENSSSCT00000054141	7,6	2:102532849-102535640|2:102536007-102539506
chr2	102535640	102539766	-	3	circRNA	ENSSSCT00000054141	7,6,5	2:102532849-102535640|2:102539766-102547033
chr2	103342192	103347906	+	3	circRNA	ENSSSCT00000041202	16,17,18	2:103338999-103342192|2:103347906-103350234
chr2	103358722	103362696	+	3	circRNA	ENSSSCT00000041202	24,25,26	2:103357103-103358722|2:103362696-103364619
chr2	103387921	103392173	-	4	circRNA	ENSSSCT00000034643	14,13,12,11	2:103387068-103387921|2:103392173-103393700
chr2	103609418	103647528	+	11	circRNA	ENSSSCT00000058506	4,5,6,7,8,9,10,11,12,13,14	2:103606020-103609418|2:103647528-103653146
chr2	105140758	105158394	-	9	circRNA	ENSSSCT00000032432	24,23,22,21,20,19,18,17,16	2:105139248-105140758|2:105158394-105160098
chr2	108379644	108414093	+	3	circRNA	ENSSSCT00000062788	2,3,4	2:108256194-108379644|2:108414093-108425529
chr2	108469751	108479342	+	3	circRNA	ENSSSCT00000062788	11,12,13	2:108469204-108469751|2:108479342-108480600
chr2	108609771	108613793	+	3	circRNA	ENSSSCT00000052528	4,5,6	2:108606566-108609771|2:108613793-108615930
chr2	108631918	108651821	+	12	circRNA	ENSSSCT00000052528	11,12,13,14,15,16,17,18,19,20,21,22	2:108629902-108631918|2:108651821-108666777
chr2	113442088	113466481	-	3	circRNA	ENSSSCT00000040936	5,4,3	2:113329801-113442088|2:113466481-113479218
chr2	113879472	113883333	+	3	circRNA	ENSSSCT00000024375	4,5,6	2:113852198-113879472|2:113883333-113900081
chr2	114338108	114343919	-	2	circRNA	ENSSSCT00000061337	5,4	2:114325856-114338108|2:114343919-114358052
chr2	114706885	114741645	+	4	circRNA	ENSSSCT00000015510	2,3,4,5	2:114676988-114706885|2:114741645-114748677
chr2	114706885	114756095	+	7	circRNA	ENSSSCT00000015510	2,3,4,5,6,7,8	2:114676988-114706885|2:114756095-114762650
chr2	114727221	114751870	+	4	circRNA	ENSSSCT00000015510	4,5,6,7	2:114710012-114727221|2:114751870-114755917
chr2	114748677	114772430	+	7	circRNA	ENSSSCT00000015510	6,7,8,9,10,11,12	2:114741645-114748677|2:114772430-114803583
chr2	114755917	114831251	+	12	circRNA	ENSSSCT00000015510	8,9,10,11,12,13,14,15,16,17,18,19	2:114751870-114755917|2:114831251-114838713
chr2	114803583	114806220	+	3	circRNA	ENSSSCT00000015510	13,14,15	2:114772430-114803583|2:114806220-114809291
chr2	114823794	114827090	+	2	circRNA	ENSSSCT00000015510	17,18	2:114809406-114823794|2:114827090-114831117
chr2	115882845	115897120	+	7	circRNA	ENSSSCT00000051417	15,16,17,18,19,20,21	2:115877726-115882845|2:115897120-115901320
chr2	115883617	115886729	+	3	circRNA	ENSSSCT00000051417	16,17,18	2:115882960-115883617|2:115886729-115894553
chr2	115894553	115897120	+	3	circRNA	ENSSSCT00000051417	19,20,21	2:115886729-115894553|2:115897120-115901320
chr2	116611880	116636115	+	3	circRNA	ENSSSCT00000015519	2,3,4	2:116442715-116611880|2:116636115-116654514
chr2	116753010	116783960	-	6	circRNA	ENSSSCT00000038180	9,8,7,6,5,4	2:116750650-116753010|2:116783960-116784869
chr2	116755676	116783960	-	6	circRNA	ENSSSCT00000049147	9,8,7,6,5,4	2:116753062-116755676|2:116783960-116784869
chr2	116783861	116793088	-	3	circRNA	ENSSSCT00000038180	4,3,2	2:116762202-116783861|2:116793088-116804423
chr2	116928507	116947260	-	8	circRNA	ENSSSCT00000057827	15,14,13,12,11,10,9,8	2:116922338-116928507|2:116947260-116955086
chr2	116970370	116975681	-	3	circRNA	ENSSSCT00000057827	5,4,3	2:116966552-116970370|2:116975681-116985150
chr2	116974277	116975681	-	2	circRNA	ENSSSCT00000057827	4,3	2:116970479-116974277|2:116975681-116985150
chr2	116985150	116987697	-	2	circRNA	ENSSSCT00000057827	2,1	2:116975681-116985150|None
chr2	117342603	117381677	+	3	circRNA	ENSSSCT00000015527	3,4,5	2:117236649-117342603|2:117381677-117392153
chr2	117419181	117427557	+	3	circRNA	ENSSSCT00000015527	11,12,13	2:117400152-117419181|2:117427557-117450131
chr2	118057477	118058595	+	4	circRNA	ENSSSCT00000015529	14,15,16,17	2:118053569-118057477|2:118058595-118060528
chr2	118058167	118060611	+	4	circRNA	ENSSSCT00000015529	15,16,17,18	2:118057656-118058167|2:118060611-118066320
chr2	118058167	118066426	+	5	circRNA	ENSSSCT00000015529	15,16,17,18,19	2:118057656-118058167|2:118066426-118068133
chr2	118081216	118088434	+	3	circRNA	ENSSSCT00000015529	27,28,29	2:118077044-118081216|2:118088434-118090014
chr2	118728898	118774228	+	4	circRNA	ENSSSCT00000015531	1,2,3,4	None|2:118774228-118848751
chr2	118773809	118774228	+	1	circRNA	ENSSSCT00000015531	4	2:118731922-118773809|2:118774228-118848751
chr2	119395691	119433901	-	7	circRNA	ENSSSCT00000053180	8,7,6,5,4,3,2	2:119391323-119395691|2:119433901-119440174
chr2	119991571	120030091	+	4	circRNA	ENSSSCT00000015538	3,4,5,6	2:119966054-119991571|2:120030091-120033391
chr2	120584608	120623318	-	17	circRNA	ENSSSCT00000015542	18,17,16,15,14,13,12,11,10,9,8,7,6,5,4,3,2	2:120564342-120584608|2:120623318-120686493
chr2	123019670	123032191	+	5	circRNA	ENSSSCT00000024571	3,4,5,6,7	2:123017571-123019670|2:123032191-123037200
chr2	123030671	123037390	+	3	circRNA	ENSSSCT00000024571	6,7,8	2:123026231-123030671|2:123037390-123038910
chr2	123042225	123114343	+	28	circRNA	ENSSSCT00000024571	10,11,12,13,14,15,16,17,18,19,20,21,22,23,24,25,26,27,28,29,30,31,32,33,34,35,36,37	2:123039079-123042225|2:123114343-123117897
chr2	123051490	123052415	+	2	circRNA	ENSSSCT00000024571	16,17	2:123048849-123051490|2:123052415-123055756
chr2	123076247	123083549	+	3	circRNA	ENSSSCT00000024571	27,28,29	2:123073070-123076247|2:123083549-123087775
chr2	123076247	123087906	+	4	circRNA	ENSSSCT00000024571	27,28,29,30	2:123073070-123076247|2:123087906-123096689
chr2	123076247	123113346	+	10	circRNA	ENSSSCT00000024571	27,28,29,30,31,32,33,34,35,36	2:123073070-123076247|2:123113346-123114201
chr2	123114201	123122357	+	4	circRNA	ENSSSCT00000024571	37,38,39,40	2:123113346-123114201|2:123122357-123126274
chr2	123344431	123365544	+	9	circRNA	ENSSSCT00000025027	9,10,11,12,13,14,15,16,17	2:123334181-123344431|2:123365544-123373664
chr2	123347720	123365544	+	8	circRNA	ENSSSCT00000025027	10,11,12,13,14,15,16,17	2:123344523-123347720|2:123365544-123373664
chr2	123349999	123380557	+	12	circRNA	ENSSSCT00000025027	11,12,13,14,15,16,17,18,19,20,21,22	2:123347745-123349999|2:123380557-123385868
chr2	123352701	123365544	+	6	circRNA	ENSSSCT00000025027	12,13,14,15,16,17	2:123350128-123352701|2:123365544-123373664
chr2	125562142	125562854	+	1	circRNA	ENSSSCT00000031934	7	2:125561122-125562142|2:125562854-125564275
chr2	126919854	126925146	-	3	circRNA	ENSSSCT00000038553	5,4,3	2:126908346-126919854|2:126925146-126929538
chr2	127051485	127082160	+	5	circRNA	ENSSSCT00000015560	2,3,4,5,6	2:127017484-127051485|2:127082160-127098867
chr2	127080035	127082160	+	2	circRNA	ENSSSCT00000015560	5,6	2:127065981-127080035|2:127082160-127098867
chr2	129588956	129598465	+	4	circRNA	ENSSSCT00000060056	2,3,4,5	2:129511345-129588956|2:129598465-129603363
chr2	129603363	129605555	+	3	circRNA	ENSSSCT00000060056	6,7,8	2:129598465-129603363|2:129605555-129608784
chr2	129669692	129671578	-	3	circRNA	ENSSSCT00000062287	16,15,14	2:129667612-129669692|2:129671578-129675012
chr2	129669692	129675119	-	4	circRNA	ENSSSCT00000062287	16,15,14,13	2:129667612-129669692|2:129675119-129676221
chr2	129832475	129838638	+	4	circRNA	ENSSSCT00000046675	2,3,4,5	2:129808051-129832475|2:129838638-129844592
chr2	129914565	129918399	-	2	circRNA	ENSSSCT00000015569	3,2	2:129889036-129914565|2:129918399-130026162
chr2	131043897	131045975	+	3	circRNA	ENSSSCT00000062062	3,4,5	2:131017342-131043897|2:131045975-131056439
chr2	131354293	131363905	-	3	circRNA	ENSSSCT00000015577	5,4,3	2:131309908-131354293|2:131363905-131369109
chr2	131761607	131772491	+	3	circRNA	ENSSSCT00000015578	2,3,4	2:131751175-131761607|2:131772491-131793856
chr2	133488824	133496034	+	3	circRNA	ENSSSCT00000052533	2,3,4	2:133480253-133488824|2:133496034-133507666
chr2	133638587	133638912	+	1	circRNA	ENSSSCT00000046112	3	2:133606686-133638587|2:133638912-133675043
chr2	133761974	133796632	-	9	circRNA	ENSSSCT00000064186	17,16,15,14,13,12,11,10,9	2:133753209-133761974|2:133796632-133799695
chr2	133976285	133983650	-	4	circRNA	ENSSSCT00000060769	15,14,13,12	2:133969349-133976285|2:133983650-133999109
chr2	133976285	134034219	-	14	circRNA	ENSSSCT00000060769	15,14,13,12,11,10,9,8,7,6,5,4,3,2	2:133969349-133976285|2:134034219-134093176
chr2	133999109	134034219	-	10	circRNA	ENSSSCT00000060769	11,10,9,8,7,6,5,4,3,2	2:133983650-133999109|2:134034219-134093176
chr2	134006415	134018086	-	6	circRNA	ENSSSCT00000060769	9,8,7,6,5,4	2:134002824-134006415|2:134018086-134023315
chr2	134015624	134034219	-	5	circRNA	ENSSSCT00000060769	6,5,4,3,2	2:134010951-134015624|2:134034219-134093176
chr2	134016972	134034219	-	4	circRNA	ENSSSCT00000060769	5,4,3,2	2:134015716-134016972|2:134034219-134093176
chr2	134183058	134192011	-	2	circRNA	ENSSSCT00000015593	5,4	2:134155709-134183058|2:134192011-134204049
chr2	134226908	134233031	-	4	circRNA	ENSSSCT00000064403	20,19,18,17	2:134214541-134226908|2:134233031-134233734
chr2	134226908	134238898	-	9	circRNA	ENSSSCT00000064403	20,19,18,17,16,15,14,13,12	2:134214541-134226908|2:134238898-134240182
chr2	134228133	134233031	-	3	circRNA	ENSSSCT00000064403	19,18,17	2:134226980-134228133|2:134233031-134233734
chr2	134228133	134235617	-	5	circRNA	ENSSSCT00000064403	19,18,17,16,15	2:134226980-134228133|2:134235617-134236870
chr2	134228133	134259853	-	18	circRNA	ENSSSCT00000064403	19,18,17,16,15,14,13,12,11,10,9,8,7,6,5,4,3,2	2:134226980-134228133|2:134259853-134265832
chr2	134229618	134233031	-	2	circRNA	ENSSSCT00000064403	18,17	2:134228235-134229618|2:134233031-134233734
chr2	134229618	134235617	-	4	circRNA	ENSSSCT00000064403	18,17,16,15	2:134228235-134229618|2:134235617-134236870
chr2	134232914	134238898	-	6	circRNA	ENSSSCT00000064403	17,16,15,14,13,12	2:134229762-134232914|2:134238898-134240182
chr2	134847512	134893931	+	12	circRNA	ENSSSCT00000044716	4,5,6,7,8,9,10,11,12,13,14,15	2:134742678-134847512|2:134893931-134898949
chr2	134847512	134908874	+	18	circRNA	ENSSSCT00000044716	4,5,6,7,8,9,10,11,12,13,14,15,16,17,18,19,20,21	2:134742678-134847512|2:134908874-134910540
chr2	134860921	134861123	+	1	ciRNA	ENSSSCT00000044716	7	2:134860921-134875235
chr2	134875235	134877393	+	3	circRNA	ENSSSCT00000044716	8,9,10	2:134860921-134875235|2:134877393-134887143
chr2	134908584	134908874	+	2	circRNA	ENSSSCT00000044716	20,21	2:134907851-134908584|2:134908874-134910540
chr2	135207681	135216524	-	6	circRNA	ENSSSCT00000045065	18,17,16,15,14,13	2:135206264-135207681|2:135216524-135220526
chr2	135240335	135248144	-	3	circRNA	ENSSSCT00000045065	6,5,4	2:135228423-135240335|2:135248144-135251744
chr2	135245330	135248144	-	2	circRNA	ENSSSCT00000045065	5,4	2:135240422-135245330|2:135248144-135251744
chr2	135356734	135361038	+	3	circRNA	ENSSSCT00000015615	2,3,4	2:135306113-135356734|2:135361038-135367506
chr2	136318557	136320614	-	4	circRNA	ENSSSCT00000058217	5,4,3,2	2:136311450-136318557|2:136320614-136334272
chr2	136895592	136896075	+	1	circRNA	ENSSSCT00000061719	3	2:136842072-136895592|2:136896075-136903835
chr2	136895592	136920524	+	10	circRNA	ENSSSCT00000061719	3,4,5,6,7,8,9,10,11,12	2:136842072-136895592|2:136920524-136926244
chr2	136903835	136906080	+	2	circRNA	ENSSSCT00000061719	4,5	2:136896075-136903835|2:136906080-136907205
chr2	136903835	136907907	+	4	circRNA	ENSSSCT00000061719	4,5,6,7	2:136896075-136903835|2:136907907-136909180
chr2	136903835	136920524	+	9	circRNA	ENSSSCT00000061719	4,5,6,7,8,9,10,11,12	2:136896075-136903835|2:136920524-136926244
chr2	136906002	136907907	+	3	circRNA	ENSSSCT00000061719	5,6,7	2:136904006-136906002|2:136907907-136909180
chr2	136906002	136929529	+	12	circRNA	ENSSSCT00000061719	5,6,7,8,9,10,11,12,13,14,15,16	2:136904006-136906002|2:136929529-136933660
chr2	136907205	136907907	+	2	circRNA	ENSSSCT00000061719	6,7	2:136906080-136907205|2:136907907-136909180
chr2	136907205	136911528	+	4	circRNA	ENSSSCT00000061719	6,7,8,9	2:136906080-136907205|2:136911528-136913997
chr2	136907205	136914107	+	5	circRNA	ENSSSCT00000061719	6,7,8,9,10	2:136906080-136907205|2:136914107-136915901
chr2	136907205	136916014	+	6	circRNA	ENSSSCT00000061719	6,7,8,9,10,11	2:136906080-136907205|2:136916014-136920405
chr2	136907205	136920524	+	7	circRNA	ENSSSCT00000061719	6,7,8,9,10,11,12	2:136906080-136907205|2:136920524-136926244
chr2	136907205	136929529	+	11	circRNA	ENSSSCT00000061719	6,7,8,9,10,11,12,13,14,15,16	2:136906080-136907205|2:136929529-136933660
chr2	136907205	136933834	+	12	circRNA	ENSSSCT00000061719	6,7,8,9,10,11,12,13,14,15,16,17	2:136906080-136907205|2:136933834-136937610
chr2	136907205	136937721	+	13	circRNA	ENSSSCT00000061719	6,7,8,9,10,11,12,13,14,15,16,17,18	2:136906080-136907205|2:136937721-136940367
chr2	136907205	136942864	+	15	circRNA	ENSSSCT00000061719	6,7,8,9,10,11,12,13,14,15,16,17,18,19,20	2:136906080-136907205|2:136942864-136946314
chr2	136920405	136929529	+	5	circRNA	ENSSSCT00000061719	12,13,14,15,16	2:136916014-136920405|2:136929529-136933660
chr2	136926244	136928844	+	3	circRNA	ENSSSCT00000061719	13,14,15	2:136920524-136926244|2:136928844-136929370
chr2	136926244	136929529	+	4	circRNA	ENSSSCT00000061719	13,14,15,16	2:136920524-136926244|2:136929529-136933660
chr2	136980710	136993504	+	9	circRNA	ENSSSCT00000027801	3,4,5,6,7,8,9,10,11	2:136977025-136980710|2:136993504-136995272
chr2	136999490	137008912	+	3	circRNA	ENSSSCT00000027801	14,15,16	2:136997207-136999490|2:137008912-137012677
chr2	137561514	137614409	-	4	circRNA	ENSSSCT00000050898	5,4,3,2	2:137553861-137561514|2:137614409-137623676
chr2	137591762	137592492	-	2	circRNA	ENSSSCT00000050898	4,3	2:137561622-137591762|2:137592492-137614204
chr2	137591762	137614409	-	3	circRNA	ENSSSCT00000050898	4,3,2	2:137561622-137591762|2:137614409-137623676
chr2	138308108	138308679	+	1	circRNA	ENSSSCT00000053829	2	2:138288227-138308108|2:138308679-138315761
chr2	138308108	138320744	+	3	circRNA	ENSSSCT00000053829	2,3,4	2:138288227-138308108|2:138320744-138333864
chr2	139698623	139718947	-	3	circRNA	ENSSSCT00000043401	7,6,5	2:139687444-139698623|2:139718947-139736794
chr2	139964037	139964379	-	2	circRNA	ENSSSCT00000041691	21,20	2:139963224-139964037|2:139964379-139967629
chr2	140192732	140193271	-	1	ciRNA	ENSSSCT00000015653	9	2:140192135-140193271
chr2	140222533	140225257	-	5	circRNA	ENSSSCT00000015651	9,8,7,6,5	2:140215014-140222533|2:140225257-140226834
chr2	140368191	140378302	+	5	circRNA	ENSSSCT00000015658	3,4,5,6,7	2:140346440-140368191|2:140378302-140382765
chr2	140411118	140413331	+	3	circRNA	ENSSSCT00000015658	22,23,24	2:140408972-140411118|2:140413331-140414502
chr2	140517594	140524448	-	6	circRNA	ENSSSCT00000015665	13,12,11,10,9,8	2:140517001-140517594|2:140524448-140525717
chr2	140718297	140720559	+	2	circRNA	ENSSSCT00000015666	2,3	2:140682920-140718297|2:140720559-140745890
chr2	140754234	140757554	+	2	circRNA	ENSSSCT00000015666	6,7	2:140746698-140754234|2:140757554-140823966
chr2	140823966	140839225	+	3	circRNA	ENSSSCT00000015666	8,9,10	2:140757554-140823966|2:140839225-140849168
chr2	141051819	141058934	-	2	circRNA	ENSSSCT00000015670	3,2	2:140964502-141051819|2:141058934-141089977
chr2	141217890	141223721	+	9	circRNA	ENSSSCT00000048814	7,8,9,10,11,12,13,14,15	2:141216132-141217890|2:141223721-141226339
chr2	141219339	141220554	+	3	circRNA	ENSSSCT00000048814	10,11,12	2:141218688-141219339|2:141220554-141222011
chr2	141219339	141222143	+	4	circRNA	ENSSSCT00000048814	10,11,12,13	2:141218688-141219339|2:141222143-141223202
chr2	141219339	141223721	+	6	circRNA	ENSSSCT00000048814	10,11,12,13,14,15	2:141218688-141219339|2:141223721-141226339
chr2	141219339	141227168	+	8	circRNA	ENSSSCT00000048814	10,11,12,13,14,15,16,17	2:141218688-141219339|2:141227168-141229166
chr2	141254413	141256480	+	2	circRNA	ENSSSCT00000031093	2,3	2:141237566-141254413|2:141256480-141259199
chr2	141440311	141450724	+	5	circRNA	ENSSSCT00000050070	2,3,4,5,6	2:141436620-141440311|2:141450724-141457139
chr2	141450343	141450724	+	3	circRNA	ENSSSCT00000050070	4,5,6	2:141440374-141450343|2:141450724-141457139
chr2	141450454	141457233	+	3	circRNA	ENSSSCT00000050070	5,6,7	2:141450375-141450454|2:141457233-141458888
chr2	142190604	142194365	+	2	circRNA	ENSSSCT00000015694	2,3	2:142166700-142190604|2:142194365-142195746
chr2	142190604	142202172	+	6	circRNA	ENSSSCT00000015694	2,3,4,5,6,7	2:142166700-142190604|2:142202172-142212376
chr2	142242468	142275645	+	14	circRNA	ENSSSCT00000015694	11,12,13,14,15,16,17,18,19,20,21,22,23,24	2:142219557-142242468|2:142275645-142280492
chr2	142275528	142282189	+	3	circRNA	ENSSSCT00000015694	24,25,26	2:142274235-142275528|2:142282189-142282813
chr2	142280492	142288916	+	5	circRNA	ENSSSCT00000015694	25,26,27,28,29	2:142275645-142280492|2:142288916-142293178
chr2	142406867	142407330	+	2	circRNA	ENSSSCT00000015706	9,10	2:142406328-142406867|2:142407330-142407995
chr2	142407995	142408735	+	2	circRNA	ENSSSCT00000015706	11,12	2:142407330-142407995|2:142408735-142409429
chr2	143714159	143722191	+	4	circRNA	ENSSSCT00000015730	2,3,4,5	2:143629876-143714159|2:143722191-143725252
chr2	143717171	143720664	+	2	circRNA	ENSSSCT00000015730	3,4	2:143714247-143717171|2:143720664-143722066
chr2	144455835	144485328	+	6	circRNA	ENSSSCT00000015737	5,6,7,8,9,10	2:144449888-144455835|2:144485328-144504191
chr2	144466341	144485328	+	5	circRNA	ENSSSCT00000015737	6,7,8,9,10	2:144455937-144466341|2:144485328-144504191
chr2	144473586	144485328	+	4	circRNA	ENSSSCT00000015737	7,8,9,10	2:144466452-144473586|2:144485328-144504191
chr2	144591461	144612731	+	5	circRNA	ENSSSCT00000015737	13,14,15,16,17	2:144567736-144591461|2:144612731-144670120
chr2	144595182	144612731	+	4	circRNA	ENSSSCT00000015737	14,15,16,17	2:144591527-144595182|2:144612731-144670120
chr2	144609014	144612731	+	3	circRNA	ENSSSCT00000015737	15,16,17	2:144595257-144609014|2:144612731-144670120
chr2	144609014	144670280	+	4	circRNA	ENSSSCT00000015737	15,16,17,18	2:144595257-144609014|2:144670280-144685613
chr2	144843115	144843394	-	1	circRNA	ENSSSCT00000063621	4	2:144841657-144843115|2:144843394-144850173
chr2	145659863	145661001	-	2	circRNA	ENSSSCT00000049993	4,3	2:145657757-145659863|2:145661001-145667821
chr2	147146890	147175048	-	4	circRNA	ENSSSCT00000037134	5,4,3,2	2:147117183-147146890|2:147175048-147191438
chr2	147170888	147175048	-	3	circRNA	ENSSSCT00000037134	4,3,2	2:147146996-147170888|2:147175048-147191438
chr2	147515854	147519634	-	3	circRNA	ENSSSCT00000029042	15,14,13	2:147510476-147515854|2:147519634-147525020
chr2	147525020	147545691	-	11	circRNA	ENSSSCT00000015750	12,11,10,9,8,7,6,5,4,3,2	2:147519634-147525020|2:147545691-147547292
chr2	147529366	147539236	-	6	circRNA	ENSSSCT00000029042	10,9,8,7,6,5	2:147525270-147529366|2:147539236-147541356
chr2	147532214	147545691	-	7	circRNA	ENSSSCT00000015750	8,7,6,5,4,3,2	2:147529765-147532214|2:147545691-147547292
chr2	147539098	147545691	-	4	circRNA	ENSSSCT00000015750	5,4,3,2	2:147535027-147539098|2:147545691-147547292
chr2	147613385	147629163	+	9	circRNA	ENSSSCT00000015753	10,11,12,13,14,15,16,17,18	2:147609868-147613385|2:147629163-147639544
chr2	147624291	147626507	+	3	circRNA	ENSSSCT00000015753	14,15,16	2:147618667-147624291|2:147626507-147628746
chr2	147795260	147813282	+	8	circRNA	ENSSSCT00000064480	2,3,4,5,6,7,8,9	2:147792083-147795260|2:147813282-147821068
chr2	147821068	147826714	+	5	circRNA	ENSSSCT00000064480	10,11,12,13,14	2:147813282-147821068|2:147826714-147836890
chr2	149689112	149698068	+	7	circRNA	ENSSSCT00000015769	4,5,6,7,8,9,10	2:149685628-149689112|2:149698068-149699982
chr2	150622512	150639702	-	7	circRNA	ENSSSCT00000015780	9,8,7,6,5,4,3	2:150615247-150622512|2:150639702-150661052
chr2	150725021	150726097	+	2	circRNA	ENSSSCT00000015781	7,8	2:150723193-150725021|2:150726097-150728739
chr2	151040091	151052939	+	5	circRNA	ENSSSCT00000015786	2,3,4,5,6	2:151036678-151040091|2:151052939-151057064
chr2	151040091	151057468	+	6	circRNA	ENSSSCT00000015786	2,3,4,5,6,7	2:151036678-151040091|2:151057468-151059994
chr2	151040091	151065003	+	10	circRNA	ENSSSCT00000015786	2,3,4,5,6,7,8,9,10,11	2:151036678-151040091|2:151065003-151068703
chr2	151057064	151069641	+	7	circRNA	ENSSSCT00000015786	7,8,9,10,11,12,13	2:151052939-151057064|2:151069641-151091930
chr2	151059994	151069641	+	6	circRNA	ENSSSCT00000015786	8,9,10,11,12,13	2:151057468-151059994|2:151069641-151091930
chr2	151059994	151093067	+	8	circRNA	ENSSSCT00000015786	8,9,10,11,12,13,14,15	2:151057468-151059994|2:151093067-151096437
chr2	151068703	151069641	+	2	circRNA	ENSSSCT00000015786	12,13	2:151065003-151068703|2:151069641-151091930
chr2	151686103	151689933	-	3	circRNA	ENSSSCT00000040304	12,11,10	2:151683460-151686103|2:151689933-151692720
chr2	151686103	151695549	-	6	circRNA	ENSSSCT00000040304	12,11,10,9,8,7	2:151683460-151686103|2:151695549-151697213
chr3	313708	319969	-	3	circRNA	ENSSSCT00000008273	4,3,2	3:307617-313708|3:319969-321447
chr3	987418	988884	-	3	circRNA	ENSSSCT00000024640	31,30,29	3:987156-987418|3:988884-989069
chr3	3820155	3822636	+	4	circRNA	ENSSSCT00000038170	3,4,5,6	3:3807393-3820155|3:3822636-3825518
chr3	4177763	4188916	-	2	circRNA	ENSSSCT00000027403	15,14	3:4162069-4177763|3:4188916-4253998
chr3	4177763	4279580	-	10	circRNA	ENSSSCT00000027403	15,14,13,12,11,10,9,8,7,6	3:4162069-4177763|3:4279580-4288137
chr3	4256519	4279580	-	6	circRNA	ENSSSCT00000027403	11,10,9,8,7,6	3:4254710-4256519|3:4279580-4288137
chr3	4257856	4279580	-	5	circRNA	ENSSSCT00000027403	10,9,8,7,6	3:4256657-4257856|3:4279580-4288137
chr3	4264223	4277544	-	3	circRNA	ENSSSCT00000027403	9,8,7	3:4257907-4264223|3:4277544-4279477
chr3	4264223	4279580	-	4	circRNA	ENSSSCT00000027403	9,8,7,6	3:4257907-4264223|3:4279580-4288137
chr3	4264223	4308978	-	8	circRNA	ENSSSCT00000027403	9,8,7,6,5,4,3,2	3:4257907-4264223|3:4308978-4329266
chr3	4269794	4279580	-	3	circRNA	ENSSSCT00000027403	8,7,6	3:4264363-4269794|3:4279580-4288137
chr3	4269794	4308978	-	7	circRNA	ENSSSCT00000027403	8,7,6,5,4,3,2	3:4264363-4269794|3:4308978-4329266
chr3	4288137	4290175	-	2	circRNA	ENSSSCT00000027403	5,4	3:4279580-4288137|3:4290175-4303784
chr3	4303784	4308978	-	2	circRNA	ENSSSCT00000027403	3,2	3:4290175-4303784|3:4308978-4329266
chr3	4640459	4642091	-	3	circRNA	ENSSSCT00000038140	5,4,3	3:4636563-4640459|3:4642091-4642849
chr3	4974526	4985274	+	4	circRNA	ENSSSCT00000062816	2,3,4,5	3:4900728-4974526|3:4985274-4992798
chr3	5020674	5040822	-	6	circRNA	ENSSSCT00000061262	8,7,6,5,4,3	3:5018741-5020674|3:5040822-5043834
chr3	5025440	5029792	-	3	circRNA	ENSSSCT00000061262	6,5,4	3:5024456-5025440|3:5029792-5040621
chr3	5029681	5044084	-	3	circRNA	ENSSSCT00000061262	4,3,2	3:5026488-5029681|3:5044084-5048180
chr3	5082239	5089246	+	4	circRNA	ENSSSCT00000008332	2,3,4,5	3:5075232-5082239|3:5089246-5090409
chr3	5086054	5092056	+	6	circRNA	ENSSSCT00000008332	3,4,5,6,7,8	3:5082398-5086054|3:5092056-5092596
chr3	5089146	5091217	+	3	circRNA	ENSSSCT00000008332	5,6,7	3:5087710-5089146|3:5091217-5091998
chr3	5090409	5097362	+	6	circRNA	ENSSSCT00000008332	6,7,8,9,10,11	3:5089246-5090409|3:5097362-5103030
chr3	5094440	5103145	+	3	circRNA	ENSSSCT00000008332	10,11,12	3:5092924-5094440|3:5103145-5103856
chr3	5097261	5103939	+	3	circRNA	ENSSSCT00000008332	11,12,13	3:5094552-5097261|3:5103939-5105267
chr3	5123859	5131218	+	5	circRNA	ENSSSCT00000008330	5,6,7,8,9	3:5123249-5123859|3:5131218-5132823
chr3	5208684	5219219	-	5	circRNA	ENSSSCT00000028320	12,11,10,9,8	3:5202923-5208684|3:5219219-5223931
chr3	5351247	5368914	+	4	circRNA	ENSSSCT00000008339	3,4,5,6	3:5347531-5351247|3:5368914-5379493
chr3	5485272	5488726	-	3	circRNA	ENSSSCT00000008342	11,10,9	3:5483292-5485272|3:5488726-5491744
chr3	5494810	5495723	-	2	circRNA	ENSSSCT00000008342	7,6	3:5491912-5494810|3:5495723-5497230
chr3	6981005	6988833	+	3	circRNA	ENSSSCT00000037511	2,3,4	3:6977521-6981005|3:6988833-6993095
chr3	7073430	7088481	+	5	circRNA	ENSSSCT00000057164	5,6,7,8,9	3:7060940-7073430|3:7088481-7095820
chr3	7077590	7088481	+	4	circRNA	ENSSSCT00000057164	6,7,8,9	3:7073533-7077590|3:7088481-7095820
chr3	7081691	7084030	+	2	circRNA	ENSSSCT00000057164	7,8	3:7077683-7081691|3:7084030-7088337
chr3	7108865	7108911	+	1	ciRNA	ENSSSCT00000057164	19	3:7108865-7110227
chr3	7118911	7120758	+	2	circRNA	ENSSSCT00000057164	26,27	3:7116748-7118911|3:7120758-7124704
chr3	7120613	7124911	+	2	circRNA	ENSSSCT00000057164	27,28	3:7119124-7120613|3:7124911-7126682
chr3	7195353	7196235	+	2	circRNA	ENSSSCT00000032475	8,9	3:7192489-7195353|3:7196235-7196589
chr3	7480869	7497199	+	11	circRNA	ENSSSCT00000061587	2,3,4,5,6,7,8,9,10,11,12	3:7408184-7480869|3:7497199-7501556
chr3	7546637	7562712	-	11	circRNA	ENSSSCT00000044185	13,12,11,10,9,8,7,6,5,4,3	3:7544783-7546637|3:7562712-7570008
chr3	7549993	7561037	-	6	circRNA	ENSSSCT00000044185	11,10,9,8,7,6	3:7547904-7549993|3:7561037-7561630
chr3	7553136	7561037	-	5	circRNA	ENSSSCT00000044185	10,9,8,7,6	3:7550124-7553136|3:7561037-7561630
chr3	7928956	7929871	+	2	circRNA	ENSSSCT00000054086	2,3	3:7920796-7928956|3:7929871-7932156
chr3	8588690	8589011	-	2	circRNA	ENSSSCT00000030216	20,19	3:8588602-8588690|3:8589011-8589166
chr3	9509848	9570673	+	6	circRNA	ENSSSCT00000008422	4,5,6,7,8,9	3:9480949-9509848|3:9570673-9579318
chr3	9726078	9731287	+	2	circRNA	ENSSSCT00000008425	3,4	3:9724925-9726078|3:9731287-9732870
chr3	9837837	9841299	-	4	circRNA	ENSSSCT00000024358	5,4,3,2	3:9835712-9837837|3:9841299-9846096
chr3	10611670	10616729	+	4	circRNA	ENSSSCT00000061936	2,3,4,5	3:10610499-10611670|3:10616729-10624862
chr3	10770955	10789181	-	5	circRNA	ENSSSCT00000030732	14,13,12,11,10	3:10769558-10770955|3:10789181-10791827
chr3	10887360	10890452	-	6	circRNA	ENSSSCT00000048033	7,6,5,4,3,2	3:10866091-10887360|3:10890452-10892221
chr3	10962193	10962666	+	3	circRNA	ENSSSCT00000043467	2,3,4	3:10960303-10962193|3:10962666-10965834
chr3	11731298	11733763	+	2	circRNA	ENSSSCT00000031896	3,4	3:11725612-11731298|3:11733763-11735667
chr3	11731298	11736046	+	4	circRNA	ENSSSCT00000031896	3,4,5,6	3:11725612-11731298|3:11736046-11741571
chr3	11741571	11742109	+	2	circRNA	ENSSSCT00000031896	7,8	3:11736046-11741571|3:11742109-11750367
chr3	11750367	11777751	+	5	circRNA	ENSSSCT00000031896	9,10,11,12,13	3:11742109-11750367|3:11777751-11781134
chr3	11758113	11773901	+	5	circRNA	ENSSSCT00000008466	10,11,12,13,14	3:11750445-11758113|3:11773901-11777567
chr3	11760553	11773901	+	3	circRNA	ENSSSCT00000031896	10,11,12	3:11750445-11760553|3:11773901-11777567
chr3	11760553	11777751	+	4	circRNA	ENSSSCT00000031896	10,11,12,13	3:11750445-11760553|3:11777751-11781134
chr3	11760553	11782001	+	6	circRNA	ENSSSCT00000031896	10,11,12,13,14,15	3:11750445-11760553|3:11782001-11787215
chr3	11771883	11777751	+	3	circRNA	ENSSSCT00000031896	11,12,13	3:11760610-11771883|3:11777751-11781134
chr3	11771883	11782001	+	5	circRNA	ENSSSCT00000031896	11,12,13,14,15	3:11760610-11771883|3:11782001-11787215
chr3	11771883	11788778	+	7	circRNA	ENSSSCT00000031896	11,12,13,14,15,16,17	3:11760610-11771883|3:11788778-11792079
chr3	11777567	11794655	+	9	circRNA	ENSSSCT00000031896	13,14,15,16,17,18,19,20,21	3:11773901-11777567|3:11794655-11799422
chr3	11781134	11787399	+	3	circRNA	ENSSSCT00000031896	14,15,16	3:11777751-11781134|3:11787399-11788719
chr3	11781134	11794655	+	8	circRNA	ENSSSCT00000031896	14,15,16,17,18,19,20,21	3:11777751-11781134|3:11794655-11799422
chr3	11792079	11794655	+	4	circRNA	ENSSSCT00000031896	18,19,20,21	3:11788778-11792079|3:11794655-11799422
chr3	11792079	11804747	+	12	circRNA	ENSSSCT00000031896	18,19,20,21,22,23,24,25,26,27,28,29	3:11788778-11792079|3:11804747-11807117
chr3	11799422	11802603	+	4	circRNA	ENSSSCT00000031896	22,23,24,25	3:11794655-11799422|3:11802603-11802941
chr3	11867509	11882700	-	5	circRNA	ENSSSCT00000055585	7,6,5,4,3	3:11866923-11867509|3:11882700-11884221
chr3	11882561	11884325	-	2	circRNA	ENSSSCT00000055585	3,2	3:11871776-11882561|3:11884325-11897932
chr3	13854402	13854615	+	1	circRNA	ENSSSCT00000038741	2	3:13565788-13854402|3:13854615-14134661
chr3	13854402	14152325	+	3	circRNA	ENSSSCT00000038741	2,3,4	3:13565788-13854402|3:14152325-14461642
chr3	16038896	16047455	-	2	circRNA	ENSSSCT00000044023	15,14	3:15910416-16038896|3:16047455-16078526
chr3	16486967	16487913	-	1	circRNA	ENSSSCT00000037185	2	3:16454525-16486967|3:16487913-16518922
chr3	16846312	16851571	-	7	circRNA	ENSSSCT00000031361	12,11,10,9,8,7,6	3:16845243-16846312|3:16851571-16852713
chr3	16847446	16853935	-	8	circRNA	ENSSSCT00000031361	11,10,9,8,7,6,5,4	3:16846415-16847446|3:16853935-16855122
chr3	16964039	16964840	-	2	circRNA	ENSSSCT00000027523	5,4	3:16961796-16964039|3:16964840-16970173
chr3	17674306	17674911	-	2	circRNA	ENSSSCT00000056375	4,3	3:17670629-17674306|3:17674911-17680067
chr3	17688478	17691346	-	5	circRNA	ENSSSCT00000008537	17,16,15,14,13	3:17685092-17688478|3:17691346-17693008
chr3	17693008	17693900	-	3	circRNA	ENSSSCT00000008537	12,11,10	3:17691346-17693008|3:17693900-17694684
chr3	17854674	17855047	-	2	circRNA	ENSSSCT00000008545	6,5	3:17853152-17854674|3:17855047-17855700
chr3	18439756	18442149	+	5	circRNA	ENSSSCT00000058141	6,7,8,9,10	3:18437691-18439756|3:18442149-18444413
chr3	18512813	18513266	+	2	circRNA	ENSSSCT00000063630	9,10	3:18511782-18512813|3:18513266-18514098
chr3	18512813	18514451	+	4	circRNA	ENSSSCT00000063630	9,10,11,12	3:18511782-18512813|3:18514451-18514736
chr3	18826736	18830614	+	2	circRNA	ENSSSCT00000008560	7,8	3:18820783-18826736|3:18830614-18836690
chr3	19374194	19383920	+	5	circRNA	ENSSSCT00000008564	2,3,4,5,6	3:19368691-19374194|3:19383920-19392648
chr3	21478592	21479084	+	1	circRNA	ENSSSCT00000025169	6	3:21476566-21478592|3:21479084-21482454
chr3	22660734	22666364	+	2	circRNA	ENSSSCT00000038313	2,3	3:22654449-22660734|3:22666364-22670995
chr3	22705806	22713415	+	5	circRNA	ENSSSCT00000011814	2,3,4,5,6	3:22695927-22705806|3:22713415-22715278
chr3	22745956	22746522	+	2	circRNA	ENSSSCT00000011815	2,3	3:22740802-22745956|3:22746522-22747530
chr3	22745956	22747699	+	3	circRNA	ENSSSCT00000011815	2,3,4	3:22740802-22745956|3:22747699-22753347
chr3	22805322	22810630	+	2	circRNA	ENSSSCT00000011815	14,15	3:22796166-22805322|3:22810630-22822084
chr3	22810515	22822228	+	2	circRNA	ENSSSCT00000011815	15,16	3:22805406-22810515|3:22822228-22826172
chr3	22998124	23003690	-	3	circRNA	ENSSSCT00000040171	5,4,3	3:22986910-22998124|3:23003690-23005704
chr3	23073706	23075311	+	3	circRNA	ENSSSCT00000025945	3,4,5	3:23071860-23073706|3:23075311-23078819
chr3	23087627	23102487	+	5	circRNA	ENSSSCT00000025945	8,9,10,11,12	3:23084406-23087627|3:23102487-23109535
chr3	23625510	23645284	-	6	circRNA	ENSSSCT00000008588	8,7,6,5,4,3	3:23622320-23625510|3:23645284-23649061
chr3	23692699	23704670	-	3	circRNA	ENSSSCT00000030167	4,3,2	3:23670767-23692699|3:23704670-23719804
chr3	23699475	23704670	-	2	circRNA	ENSSSCT00000030167	3,2	3:23692884-23699475|3:23704670-23719804
chr3	23867537	23869023	-	3	circRNA	ENSSSCT00000008590	6,5,4	3:23865258-23867537|3:23869023-23872498
chr3	23899927	23928030	-	13	circRNA	ENSSSCT00000049675	16,15,14,13,12,11,10,9,8,7,6,5,4	3:23893129-23899927|3:23928030-23931446
chr3	23921662	23922152	-	2	circRNA	ENSSSCT00000049675	8,7	3:23921155-23921662|3:23922152-23926160
chr3	23956137	23956449	-	1	circRNA	ENSSSCT00000049675	2	3:23931547-23956137|3:23956449-23966745
chr3	24224647	24226059	-	3	circRNA	ENSSSCT00000008595	4,3,2	3:24222862-24224647|3:24226059-24228675
chr3	25217339	25220847	-	3	circRNA	ENSSSCT00000065117	12,11,10	3:25207044-25217339|3:25220847-25222203
chr3	26054772	26073104	-	3	circRNA	ENSSSCT00000030156	28,27,26	3:26046090-26054772|3:26073104-26074278
chr3	26683192	26685606	+	2	circRNA	ENSSSCT00000054147	3,4	3:26682078-26683192|3:26685606-26686955
chr3	26683192	26688224	+	4	circRNA	ENSSSCT00000054147	3,4,5,6	3:26682078-26683192|3:26688224-26689979
chr3	26683192	26690578	+	6	circRNA	ENSSSCT00000054147	3,4,5,6,7,8	3:26682078-26683192|3:26690578-26691920
chr3	26683192	26703165	+	14	circRNA	ENSSSCT00000054147	3,4,5,6,7,8,9,10,11,12,13,14,15,16	3:26682078-26683192|3:26703165-26704236
chr3	26683192	26705896	+	18	circRNA	ENSSSCT00000054147	3,4,5,6,7,8,9,10,11,12,13,14,15,16,17,18,19,20	3:26682078-26683192|3:26705896-26706434
chr3	26689979	26705896	+	14	circRNA	ENSSSCT00000054147	7,8,9,10,11,12,13,14,15,16,17,18,19,20	3:26688224-26689979|3:26705896-26706434
chr3	26691920	26697117	+	3	circRNA	ENSSSCT00000054147	9,10,11	3:26690578-26691920|3:26697117-26698721
chr3	26696892	26703165	+	6	circRNA	ENSSSCT00000054147	11,12,13,14,15,16	3:26693748-26696892|3:26703165-26704236
chr3	26701498	26701952	+	2	circRNA	ENSSSCT00000054147	14,15	3:26699741-26701498|3:26701952-26703046
chr3	26701498	26703165	+	3	circRNA	ENSSSCT00000054147	14,15,16	3:26699741-26701498|3:26703165-26704236
chr3	26701498	26705896	+	7	circRNA	ENSSSCT00000054147	14,15,16,17,18,19,20	3:26699741-26701498|3:26705896-26706434
chr3	26731231	26732627	+	4	circRNA	ENSSSCT00000054147	42,43,44,45	3:26730173-26731231|3:26732627-26733225
chr3	26750928	26751512	+	2	circRNA	ENSSSCT00000054147	61,62	3:26750325-26750928|3:26751512-26753660
chr3	26763533	26768220	+	4	circRNA	ENSSSCT00000032370	2,3,4,5	3:26760759-26763533|3:26768220-26768647
chr3	27292823	27293334	-	1	circRNA	ENSSSCT00000008627	3	3:27240362-27292823|3:27293334-27386790
chr3	28229432	28231488	-	2	circRNA	ENSSSCT00000037424	13,12	3:28227963-28229432|3:28231488-28238579
chr3	28242596	28243686	-	2	circRNA	ENSSSCT00000037424	8,7	3:28242016-28242596|3:28243686-28246777
chr3	28586174	28600542	-	6	circRNA	ENSSSCT00000008634	7,6,5,4,3,2	3:28573753-28586174|3:28600542-28612028
chr3	28617582	28630840	+	5	circRNA	ENSSSCT00000053722	2,3,4,5,6	3:28617174-28617582|3:28630840-28638833
chr3	28638833	28659610	+	9	circRNA	ENSSSCT00000053722	7,8,9,10,11,12,13,14,15	3:28630840-28638833|3:28659610-28661159
chr3	28638833	28692651	+	15	circRNA	ENSSSCT00000053722	7,8,9,10,11,12,13,14,15,16,17,18,19,20,21	3:28630840-28638833|3:28692651-28754388
chr3	28645514	28659610	+	5	circRNA	ENSSSCT00000053722	11,12,13,14,15	3:28643282-28645514|3:28659610-28661159
chr3	28649760	28685576	+	9	circRNA	ENSSSCT00000053722	12,13,14,15,16,17,18,19,20	3:28645595-28649760|3:28685576-28692576
chr3	28653794	28692651	+	9	circRNA	ENSSSCT00000053722	13,14,15,16,17,18,19,20,21	3:28649817-28653794|3:28692651-28754388
chr3	28684206	28790148	+	5	circRNA	ENSSSCT00000053722	19,20,21,22,23	3:28663914-28684206|3:28790148-28801462
chr3	28903671	28904794	-	2	circRNA	ENSSSCT00000051883	3,2	3:28896648-28903671|3:28904794-28914659
chr3	29015479	29159086	-	7	circRNA	ENSSSCT00000049793	8,7,6,5,4,3,2	3:29002047-29015479|3:29159086-29167863
chr3	29095383	29159086	-	2	circRNA	ENSSSCT00000049793	3,2	3:29024721-29095383|3:29159086-29167863
chr3	30854369	30927691	-	2	circRNA	ENSSSCT00000055203	15,14	3:30789850-30854369|3:30927691-30997492
chr3	30997492	31000160	-	2	circRNA	ENSSSCT00000055203	13,12	3:30927691-30997492|3:31000160-31040832
chr3	31040832	31082104	-	8	circRNA	ENSSSCT00000055203	11,10,9,8,7,6,5,4	3:31000160-31040832|3:31082104-31106498
chr3	31250807	31266844	+	11	circRNA	ENSSSCT00000064690	5,6,7,8,9,10,11,12,13,14,15	3:31249513-31250807|3:31266844-31269242
chr3	31255431	31256666	+	3	circRNA	ENSSSCT00000064690	8,9,10	3:31253767-31255431|3:31256666-31258830
chr3	31255431	31258924	+	4	circRNA	ENSSSCT00000064690	8,9,10,11	3:31253767-31255431|3:31258924-31260665
chr3	31255431	31260746	+	5	circRNA	ENSSSCT00000064690	8,9,10,11,12	3:31253767-31255431|3:31260746-31265466
chr3	31258830	31266844	+	5	circRNA	ENSSSCT00000064690	11,12,13,14,15	3:31256666-31258830|3:31266844-31269242
chr3	31358569	31359294	+	2	circRNA	ENSSSCT00000008651	14,15	3:31357218-31358569|3:31359294-31360594
chr3	31360594	31361255	+	2	circRNA	ENSSSCT00000008651	16,17	3:31359294-31360594|3:31361255-31362795
chr3	31406302	31427968	+	3	circRNA	ENSSSCT00000008652	5,6,7	3:31394045-31406302|3:31427968-31433481
chr3	32047942	32067395	-	6	circRNA	ENSSSCT00000035852	18,17,16,15,14,13	3:31994331-32047942|3:32067395-32081241
chr3	32047942	32085104	-	8	circRNA	ENSSSCT00000035852	18,17,16,15,14,13,12,11	3:31994331-32047942|3:32085104-32098204
chr3	32063947	32085104	-	4	circRNA	ENSSSCT00000035852	14,13,12,11	3:32062237-32063947|3:32085104-32098204
chr3	32081241	32130236	-	9	circRNA	ENSSSCT00000035852	12,11,10,9,8,7,6,5,4	3:32067395-32081241|3:32130236-32140117
chr3	32116490	32127110	-	5	circRNA	ENSSSCT00000035852	9,8,7,6,5	3:32098436-32116490|3:32127110-32130087
chr3	32116490	32130236	-	6	circRNA	ENSSSCT00000035852	9,8,7,6,5,4	3:32098436-32116490|3:32130236-32140117
chr3	32116490	32145332	-	8	circRNA	ENSSSCT00000035852	9,8,7,6,5,4,3,2	3:32098436-32116490|3:32145332-32158059
chr3	32193187	32193920	-	2	circRNA	ENSSSCT00000047795	10,9	3:32192101-32193187|3:32193920-32195319
chr3	32558923	32577584	-	5	circRNA	ENSSSCT00000047580	6,5,4,3,2	3:32544122-32558923|3:32577584-32598790
chr3	33789130	33791943	+	3	circRNA	ENSSSCT00000008664	6,7,8	3:33787969-33789130|3:33791943-33792713
chr3	37338659	37338945	-	2	circRNA	ENSSSCT00000008679	3,2	3:37335107-37338659|3:37338945-37340152
chr3	37572783	37578986	+	4	circRNA	ENSSSCT00000041735	7,8,9,10	3:37571134-37572783|3:37578986-37583400
chr3	37730064	37733938	-	4	circRNA	ENSSSCT00000053588	5,4,3,2	3:37720018-37730064|3:37733938-37747847
chr3	38275929	38288061	+	6	circRNA	ENSSSCT00000008713	4,5,6,7,8,9	3:38262442-38275929|3:38288061-38293304
chr3	38413986	38414699	+	1	circRNA	ENSSSCT00000008714	2	3:38388652-38413986|3:38414699-38450057
chr3	38413986	38450234	+	2	circRNA	ENSSSCT00000008714	2,3	3:38388652-38413986|3:38450234-38470923
chr3	38413986	38472523	+	4	circRNA	ENSSSCT00000008714	2,3,4,5	3:38388652-38413986|3:38472523-38481320
chr3	38470923	38472523	+	2	circRNA	ENSSSCT00000008714	4,5	3:38450234-38470923|3:38472523-38481320
chr3	38483179	38484897	+	3	circRNA	ENSSSCT00000008714	7,8,9	3:38481563-38483179|3:38484897-38485583
chr3	38500630	38502398	+	3	circRNA	ENSSSCT00000008714	17,18,19	3:38494815-38500630|3:38502398-38508426
chr3	38726647	38745384	-	7	circRNA	ENSSSCT00000029019	10,9,8,7,6,5,4	3:38721878-38726647|3:38745384-38749077
chr3	38741342	38745384	-	3	circRNA	ENSSSCT00000029019	6,5,4	3:38737226-38741342|3:38745384-38749077
chr3	39445691	39478565	-	10	circRNA	ENSSSCT00000046231	11,10,9,8,7,6,5,4,3,2	3:39437060-39445691|3:39478565-39512460
chr3	39466945	39478565	-	5	circRNA	ENSSSCT00000046231	6,5,4,3,2	3:39454645-39466945|3:39478565-39512460
chr3	40110489	40127914	+	8	circRNA	ENSSSCT00000059272	5,6,7,8,9,10,11,12	3:40108267-40110489|3:40127914-40129380
chr3	40207741	40208661	-	2	circRNA	ENSSSCT00000037226	10,9	3:40206715-40207741|3:40208661-40214056
chr3	40285328	40291060	-	3	circRNA	ENSSSCT00000008795	4,3,2	3:40275909-40285328|3:40291060-40295945
chr3	40456608	40457300	+	2	circRNA	ENSSSCT00000032550	3,4	3:40446460-40456608|3:40457300-40469708
chr3	40456608	40471377	+	4	circRNA	ENSSSCT00000032550	3,4,5,6	3:40446460-40456608|3:40471377-40490035
chr3	40469708	40471377	+	2	circRNA	ENSSSCT00000032550	5,6	3:40457300-40469708|3:40471377-40490035
chr3	40469708	40495886	+	5	circRNA	ENSSSCT00000032550	5,6,7,8,9	3:40457300-40469708|3:40495886-40501944
chr3	40901262	40917549	+	3	circRNA	ENSSSCT00000054001	3,4,5	3:40858349-40901262|3:40917549-40927152
chr3	41382090	41389501	+	4	circRNA	ENSSSCT00000023524	4,5,6,7	3:41378262-41382090|3:41389501-41392419
chr3	41460221	41461373	+	2	circRNA	ENSSSCT00000065950	6,7	3:41449100-41460221|3:41461373-41464491
chr3	41532733	41533739	+	2	circRNA	ENSSSCT00000008744	7,8	3:41525365-41532733|3:41533739-41536874
chr3	41951779	41952939	-	2	circRNA	ENSSSCT00000027044	31,30	3:41946819-41951779|3:41952939-41955216
chr3	41951779	41962459	-	6	circRNA	ENSSSCT00000027044	31,30,29,28,27,26	3:41946819-41951779|3:41962459-41964481
chr3	41961398	42001550	-	23	circRNA	ENSSSCT00000027044	27,26,25,24,23,22,21,20,19,18,17,16,15,14,13,12,11,10,9,8,7,6,5	3:41959945-41961398|3:42001550-42008183
chr3	41973351	41978180	-	3	circRNA	ENSSSCT00000027044	20,19,18	3:41971878-41973351|3:41978180-41980347
chr3	41982157	41985421	-	4	circRNA	ENSSSCT00000027044	16,15,14,13	3:41980492-41982157|3:41985421-41987047
chr3	41987047	41991443	-	4	circRNA	ENSSSCT00000027044	12,11,10,9	3:41985421-41987047|3:41991443-41993579
chr3	41990106	41991443	-	3	circRNA	ENSSSCT00000027044	11,10,9	3:41987174-41990106|3:41991443-41993579
chr3	41993579	42001550	-	4	circRNA	ENSSSCT00000027044	8,7,6,5	3:41991443-41993579|3:42001550-42008183
chr3	42001402	42012685	-	6	circRNA	ENSSSCT00000024941	7,6,5,4,3,2	3:41997769-42001402|3:42012685-42022472
chr3	42011358	42012685	-	3	circRNA	ENSSSCT00000024941	4,3,2	3:42008713-42011358|3:42012685-42022472
chr3	42027762	42036230	-	5	circRNA	ENSSSCT00000047806	16,15,14,13,12	3:42026666-42027762|3:42036230-42037129
chr3	42028879	42036230	-	4	circRNA	ENSSSCT00000047806	15,14,13,12	3:42027842-42028879|3:42036230-42037129
chr3	42881921	42882168	+	1	circRNA	ENSSSCT00000008852	2	3:42862131-42881921|3:42882168-42886965
chr3	42881921	42887048	+	2	circRNA	ENSSSCT00000008852	2,3	3:42862131-42881921|3:42887048-42901411
chr3	42881921	42901540	+	3	circRNA	ENSSSCT00000008852	2,3,4	3:42862131-42881921|3:42901540-42902741
chr3	42881921	42902838	+	4	circRNA	ENSSSCT00000008852	2,3,4,5	3:42862131-42881921|3:42902838-42919425
chr3	42919425	42946710	+	6	circRNA	ENSSSCT00000008852	6,7,8,9,10,11	3:42902838-42919425|3:42946710-42953965
chr3	42946460	42959932	+	3	circRNA	ENSSSCT00000008852	11,12,13	3:42934440-42946460|3:42959932-42961863
chr3	43044211	43051814	+	3	circRNA	ENSSSCT00000036891	2,3,4	3:42988776-43044211|3:43051814-43054735
chr3	43054735	43072523	+	14	circRNA	ENSSSCT00000036891	5,6,7,8,9,10,11,12,13,14,15,16,17,18	3:43051814-43054735|3:43072523-43075108
chr3	43952779	43953696	-	2	circRNA	ENSSSCT00000047764	14,13	3:43951628-43952779|3:43953696-43954589
chr3	44008061	44018329	-	2	circRNA	ENSSSCT00000008870	3,2	3:43997388-44008061|3:44018329-44022253
chr3	44102880	44122061	-	5	circRNA	ENSSSCT00000041159	6,5,4,3,2	3:44102153-44102880|3:44122061-44148448
chr3	44105996	44122061	-	4	circRNA	ENSSSCT00000041159	5,4,3,2	3:44102997-44105996|3:44122061-44148448
chr3	44109595	44122061	-	3	circRNA	ENSSSCT00000041159	4,3,2	3:44106130-44109595|3:44122061-44148448
chr3	44117753	44122061	-	2	circRNA	ENSSSCT00000041159	3,2	3:44109872-44117753|3:44122061-44148448
chr3	44174960	44183383	+	6	circRNA	ENSSSCT00000008872	3,4,5,6,7,8	3:44166755-44174960|None
chr3	44285778	44303573	-	7	circRNA	ENSSSCT00000008876	17,16,15,14,13,12,11	3:44284070-44285778|3:44303573-44305625
chr3	44298410	44303573	-	2	circRNA	ENSSSCT00000008876	12,11	3:44298055-44298410|3:44303573-44305625
chr3	44522988	44535936	+	8	circRNA	ENSSSCT00000051961	10,11,12,13,14,15,16,17	3:44522522-44522988|3:44535936-44537285
chr3	44522988	44544862	+	10	circRNA	ENSSSCT00000051961	10,11,12,13,14,15,16,17,18,19	3:44522522-44522988|3:44544862-44546436
chr3	44544593	44544862	+	1	circRNA	ENSSSCT00000051961	19	3:44537473-44544593|3:44544862-44546436
chr3	44544593	44546528	+	2	circRNA	ENSSSCT00000051961	19,20	3:44537473-44544593|3:44546528-44547708
chr3	44578550	44582778	+	4	circRNA	ENSSSCT00000051961	39,40,41,42	3:44577795-44578550|3:44582778-44584239
chr3	44954038	44965534	+	2	circRNA	ENSSSCT00000040867	2,3	3:44828035-44954038|3:44965534-44983408
chr3	45358463	45378164	-	2	circRNA	ENSSSCT00000064094	12,11	3:45329889-45358463|3:45378164-45447099
chr3	46142070	46151353	+	4	circRNA	ENSSSCT00000008889	2,3,4,5	3:46137764-46142070|3:46151353-46154160
chr3	46154160	46159948	+	4	circRNA	ENSSSCT00000008889	6,7,8,9	3:46151353-46154160|3:46159948-46160519
chr3	46155822	46165165	+	5	circRNA	ENSSSCT00000008889	7,8,9,10,11	3:46154195-46155822|3:46165165-46167830
chr3	47004816	47007039	+	4	circRNA	ENSSSCT00000037184	5,6,7,8	3:46980727-47004816|3:47007039-47007723
chr3	47004816	47007823	+	5	circRNA	ENSSSCT00000037184	5,6,7,8,9	3:46980727-47004816|3:47007823-47014981
chr3	47538681	47568909	-	14	circRNA	ENSSSCT00000031443	26,25,24,23,22,21,20,19,18,17,16,15,14,13	3:47534483-47538681|3:47568909-47570225
chr3	47549283	47550135	-	2	circRNA	ENSSSCT00000031443	23,22	3:47548311-47549283|3:47550135-47553578
chr3	47554216	47559191	-	1	circRNA	ENSSSCT00000031443	20	3:47553656-47554216|3:47559191-47560022
chr3	47572234	47574992	-	2	circRNA	ENSSSCT00000031443	9,8	3:47571010-47572234|3:47574992-47578590
chr3	47581984	47589668	-	4	circRNA	ENSSSCT00000031443	6,5,4,3	3:47578783-47581984|3:47589668-47591098
chr3	47619649	47620978	-	3	circRNA	ENSSSCT00000043323	5,4,3	3:47617522-47619649|3:47620978-47629610
chr3	48893038	48899041	+	4	circRNA	ENSSSCT00000008920	2,3,4,5	3:48871152-48893038|3:48899041-48908864
chr3	48893038	48909045	+	5	circRNA	ENSSSCT00000008920	2,3,4,5,6	3:48871152-48893038|3:48909045-48919779
chr3	49135556	49135742	-	1	circRNA	ENSSSCT00000038615	2	3:49109196-49135556|3:49135742-49147940
chr3	49493942	49496419	+	2	circRNA	ENSSSCT00000054122	4,5	3:49485273-49493942|3:49496419-49505176
chr3	51513528	51521405	+	4	circRNA	ENSSSCT00000052194	2,3,4,5	3:51511621-51513528|3:51521405-51522594
chr3	51582352	51591525	-	2	circRNA	ENSSSCT00000008930	3,2	3:51564671-51582352|3:51591525-51622475
chr3	51692104	51708008	-	5	circRNA	ENSSSCT00000008932	11,10,9,8,7	3:51687997-51692104|3:51708008-51711883
chr3	51692104	51713182	-	7	circRNA	ENSSSCT00000008932	11,10,9,8,7,6,5	3:51687997-51692104|3:51713182-51716779
chr3	51704285	51711970	-	3	circRNA	ENSSSCT00000008932	8,7,6	3:51697304-51704285|3:51711970-51712979
chr3	51707937	51716997	-	4	circRNA	ENSSSCT00000008932	7,6,5,4	3:51704447-51707937|3:51716997-51718441
chr3	51711883	51716997	-	3	circRNA	ENSSSCT00000008932	6,5,4	3:51708008-51711883|3:51716997-51718441
chr3	52209211	52221378	-	6	circRNA	ENSSSCT00000008939	7,6,5,4,3,2	3:52196616-52209211|3:52221378-52234069
chr3	53073337	53077591	-	2	circRNA	ENSSSCT00000008944	3,2	3:53069809-53073337|3:53077591-53080722
chr3	53231003	53238013	+	3	circRNA	ENSSSCT00000038915	3,4,5	3:53207446-53231003|3:53238013-53250063
chr3	53270126	53270926	+	2	circRNA	ENSSSCT00000038915	16,17	3:53262907-53270126|3:53270926-53286445
chr3	53348542	53349967	-	2	circRNA	ENSSSCT00000050320	6,5	3:53334743-53348542|3:53349967-53362232
chr3	53682935	53687311	-	4	circRNA	ENSSSCT00000040307	6,5,4,3	3:53679728-53682935|3:53687311-53690564
chr3	54799380	54816635	+	3	circRNA	ENSSSCT00000060593	4,5,6	3:54726541-54799380|3:54816635-54825055
chr3	54816466	54825208	+	2	circRNA	ENSSSCT00000060593	6,7	3:54801088-54816466|3:54825208-54828985
chr3	54832392	54848408	+	6	circRNA	ENSSSCT00000060593	9,10,11,12,13,14	3:54829689-54832392|3:54848408-54850045
chr3	54832392	54850266	+	7	circRNA	ENSSSCT00000060593	9,10,11,12,13,14,15	3:54829689-54832392|3:54850266-54850801
chr3	54832392	54850974	+	8	circRNA	ENSSSCT00000060593	9,10,11,12,13,14,15,16	3:54829689-54832392|3:54850974-54855549
chr3	54838520	54844297	+	2	circRNA	ENSSSCT00000060593	11,12	3:54834024-54838520|3:54844297-54845659
chr3	54848288	54850266	+	2	circRNA	ENSSSCT00000060593	14,15	3:54845814-54848288|3:54850266-54850801
chr3	55065167	55068453	+	4	circRNA	ENSSSCT00000008964	2,3,4,5	3:55054691-55065167|3:55068453-55069479
chr3	55227043	55234408	+	6	circRNA	ENSSSCT00000008965	4,5,6,7,8,9	3:55218509-55227043|3:55234408-55259229
chr3	55267475	55313494	+	7	circRNA	ENSSSCT00000008965	13,14,15,16,17,18,19	3:55266392-55267475|3:55313494-55319293
chr3	55631338	55645660	+	6	circRNA	ENSSSCT00000039912	6,7,8,9,10,11	3:55629445-55631338|3:55645660-55649777
chr3	55645242	55645660	+	2	circRNA	ENSSSCT00000039912	10,11	3:55642405-55645242|3:55645660-55649777
chr3	56017965	56034317	-	4	circRNA	ENSSSCT00000041868	21,20,19,18	3:56011816-56017965|3:56034317-56042291
chr3	56405640	56435482	+	18	circRNA	ENSSSCT00000058227	9,10,11,12,13,14,15,16,17,18,19,20,21,22,23,24,25,26	3:56402691-56405640|3:56435482-56435874
chr3	56412686	56418914	+	6	circRNA	ENSSSCT00000058227	12,13,14,15,16,17	3:56406910-56412686|3:56418914-56421858
chr3	56427941	56428793	+	3	circRNA	ENSSSCT00000058227	23,24,25	3:56425613-56427941|3:56428793-56435330
chr3	56975158	56975594	+	2	circRNA	ENSSSCT00000046365	4,5	3:56964470-56975158|3:56975594-56983864
chr3	57463049	57482865	+	10	circRNA	ENSSSCT00000032709	3,4,5,6,7,8,9,10,11,12	3:57439626-57463049|3:57482865-57484932
chr3	57465207	57470029	+	4	circRNA	ENSSSCT00000032709	4,5,6,7	3:57463244-57465207|3:57470029-57470917
chr3	57467638	57478744	+	7	circRNA	ENSSSCT00000032709	5,6,7,8,9,10,11	3:57465341-57467638|3:57478744-57482715
chr3	57467638	57482865	+	8	circRNA	ENSSSCT00000032709	5,6,7,8,9,10,11,12	3:57465341-57467638|3:57482865-57484932
chr3	57469888	57482865	+	6	circRNA	ENSSSCT00000032709	7,8,9,10,11,12	3:57468658-57469888|3:57482865-57484932
chr3	57484932	57485713	+	1	circRNA	ENSSSCT00000032709	13	3:57482865-57484932|3:57485713-57493725
chr3	57813372	57814349	-	2	circRNA	ENSSSCT00000025817	4,3	3:57809446-57813372|3:57814349-57818630
chr3	57941750	57942371	+	2	circRNA	ENSSSCT00000027274	2,3	3:57928514-57941750|3:57942371-57944913
chr3	58048642	58049988	-	2	circRNA	ENSSSCT00000046502	6,5	3:58046303-58048642|3:58049988-58059589
chr3	58236909	58248575	+	2	circRNA	ENSSSCT00000031530	2,3	3:58207153-58236909|3:58248575-58274404
chr3	58646041	58651952	-	4	circRNA	ENSSSCT00000034469	14,13,12,11	3:58642763-58646041|3:58651952-58652620
chr3	58665264	58667994	-	3	circRNA	ENSSSCT00000034469	4,3,2	3:58660778-58665264|3:58667994-58670090
chr3	58728342	58729924	+	2	circRNA	ENSSSCT00000009008	20,21	3:58726890-58728342|3:58729924-58732329
chr3	59403765	59409212	+	5	circRNA	ENSSSCT00000009020	3,4,5,6,7	3:59401538-59403765|3:59409212-59413322
chr3	59405321	59409212	+	3	circRNA	ENSSSCT00000009020	5,6,7	3:59404672-59405321|3:59409212-59413322
chr3	59631094	59636902	-	3	circRNA	ENSSSCT00000009026	5,4,3	3:59624120-59631094|3:59636902-59650316
chr3	60152978	60170638	+	5	circRNA	ENSSSCT00000063028	2,3,4,5,6	3:60142533-60152978|3:60170638-60172262
chr3	67569693	67571063	+	2	circRNA	ENSSSCT00000023923	7,8	3:67566131-67569693|3:67571063-67574349
chr3	68587327	68587404	-	1	ciRNA	ENSSSCT00000009076	3	3:68587236-68587404
chr3	69101865	69103269	-	2	circRNA	ENSSSCT00000064546	6,5	3:69100827-69101865|3:69103269-69105184
chr3	69208062	69216572	+	3	circRNA	ENSSSCT00000039748	2,3,4	3:69187959-69208062|3:69216572-69221304
chr3	69288805	69317475	-	6	circRNA	ENSSSCT00000042211	16,15,14,13,12,11	3:69269649-69288805|3:69317475-69325848
chr3	69297253	69308845	-	2	circRNA	ENSSSCT00000042211	14,13	3:69294845-69297253|3:69308845-69312533
chr3	69353540	69360229	-	2	circRNA	ENSSSCT00000042211	9,8	3:69327674-69353540|3:69360229-69377497
chr3	69353540	69386742	-	6	circRNA	ENSSSCT00000042211	9,8,7,6,5,4	3:69327674-69353540|3:69386742-69390769
chr3	69355297	69377657	-	2	circRNA	ENSSSCT00000042211	8,7	3:69353674-69355297|3:69377657-69382890
chr3	69377497	69386742	-	4	circRNA	ENSSSCT00000042211	7,6,5,4	3:69360229-69377497|3:69386742-69390769
chr3	69377497	69390965	-	5	circRNA	ENSSSCT00000042211	7,6,5,4,3	3:69360229-69377497|3:69390965-69400897
chr3	69377497	69401023	-	6	circRNA	ENSSSCT00000042211	7,6,5,4,3,2	3:69360229-69377497|3:69401023-69416702
chr3	69382890	69390965	-	4	circRNA	ENSSSCT00000042211	6,5,4,3	3:69377657-69382890|3:69390965-69400897
chr3	70283523	70295087	+	2	circRNA	ENSSSCT00000057848	13,14	3:70271077-70283523|3:70295087-70367272
chr3	71034283	71059460	-	11	circRNA	ENSSSCT00000009103	51,50,49,48,47,46,45,44,43,42,41	3:71028318-71034283|3:71059460-71090182
chr3	71090182	71107464	-	8	circRNA	ENSSSCT00000009103	40,39,38,37,36,35,34,33	3:71059460-71090182|3:71107464-71116675
chr3	71116675	71144745	-	10	circRNA	ENSSSCT00000009103	32,31,30,29,28,27,26,25,24,23	3:71107464-71116675|3:71144745-71150061
chr3	71165101	71179271	-	5	circRNA	ENSSSCT00000009103	16,15,14,13,12	3:71157067-71165101|3:71179271-71183849
chr3	71165101	71183965	-	6	circRNA	ENSSSCT00000009103	16,15,14,13,12,11	3:71157067-71165101|3:71183965-71184530
chr3	71167842	71179271	-	4	circRNA	ENSSSCT00000009103	15,14,13,12	3:71165184-71167842|3:71179271-71183849
chr3	71177120	71179271	-	2	circRNA	ENSSSCT00000009103	13,12	3:71168083-71177120|3:71179271-71183849
chr3	71299638	71345172	-	18	circRNA	ENSSSCT00000026994	20,19,18,17,16,15,14,13,12,11,10,9,8,7,6,5,4,3	3:71295585-71299638|3:71345172-71349497
chr3	71302757	71310818	-	5	circRNA	ENSSSCT00000026994	19,18,17,16,15	3:71299676-71302757|3:71310818-71311756
chr3	71309275	71325089	-	8	circRNA	ENSSSCT00000026994	16,15,14,13,12,11,10,9	3:71305158-71309275|3:71325089-71332899
chr3	71311756	71315459	-	4	circRNA	ENSSSCT00000026994	14,13,12,11	3:71310818-71311756|3:71315459-71324753
chr3	71311756	71336228	-	9	circRNA	ENSSSCT00000026994	14,13,12,11,10,9,8,7,6	3:71310818-71311756|3:71336228-71338205
chr3	71311756	71338498	-	10	circRNA	ENSSSCT00000026994	14,13,12,11,10,9,8,7,6,5	3:71310818-71311756|3:71338498-71339580
chr3	71313006	71336228	-	7	circRNA	ENSSSCT00000026994	12,11,10,9,8,7,6	3:71312181-71313006|3:71336228-71338205
chr3	71324753	71336228	-	5	circRNA	ENSSSCT00000026994	10,9,8,7,6	3:71315459-71324753|3:71336228-71338205
chr3	71325030	71351013	-	8	circRNA	ENSSSCT00000026994	9,8,7,6,5,4,3,2	3:71324806-71325030|3:71351013-71362530
chr3	71332899	71336228	-	3	circRNA	ENSSSCT00000026994	8,7,6	3:71325089-71332899|3:71336228-71338205
chr3	71332899	71351013	-	7	circRNA	ENSSSCT00000026994	8,7,6,5,4,3,2	3:71325089-71332899|3:71351013-71362530
chr3	71335950	71338498	-	2	circRNA	ENSSSCT00000026994	6,5	3:71334071-71335950|3:71338498-71339580
chr3	72250325	72262713	+	5	circRNA	ENSSSCT00000027073	2,3,4,5,6	3:72240849-72250325|3:72262713-72268080
chr3	72257085	72262713	+	4	circRNA	ENSSSCT00000027073	3,4,5,6	3:72250422-72257085|3:72262713-72268080
chr3	72262637	72270592	+	6	circRNA	ENSSSCT00000027073	6,7,8,9,10,11	3:72259464-72262637|3:72270592-72271683
chr3	72300369	72304536	+	2	circRNA	ENSSSCT00000057430	4,5	3:72297695-72300369|3:72304536-72306008
chr3	72300369	72306113	+	3	circRNA	ENSSSCT00000057430	4,5,6	3:72297695-72300369|3:72306113-72311653
chr3	72300369	72313890	+	5	circRNA	ENSSSCT00000057430	4,5,6,7,8	3:72297695-72300369|3:72313890-72319061
chr3	72556163	72557738	-	3	circRNA	ENSSSCT00000023271	7,6,5	3:72554699-72556163|3:72557738-72561841
chr3	72556366	72563117	-	4	circRNA	ENSSSCT00000045419	5,4,3,2	3:72552860-72556366|3:72563117-72564837
chr3	72578307	72584762	-	3	circRNA	ENSSSCT00000009127	13,12,11	3:72572572-72578307|3:72584762-72589861
chr3	72640034	72645477	-	4	circRNA	ENSSSCT00000063687	9,8,7,6	3:72633593-72640034|3:72645477-72648940
chr3	72986137	72990291	+	2	circRNA	ENSSSCT00000027178	2,3	3:72983229-72986137|3:72990291-72997176
chr3	73000671	73010440	+	3	circRNA	ENSSSCT00000027178	5,6,7	3:72997243-73000671|3:73010440-73013056
chr3	73046114	73053892	+	5	circRNA	ENSSSCT00000053007	4,5,6,7,8	3:73039722-73046114|3:73053892-73059096
chr3	73046114	73062667	+	8	circRNA	ENSSSCT00000053007	4,5,6,7,8,9,10,11	3:73039722-73046114|3:73062667-73067188
chr3	73798478	73821523	-	5	circRNA	ENSSSCT00000064073	6,5,4,3,2	3:73788603-73798478|3:73821523-73830780
chr3	76697522	76714455	-	6	circRNA	ENSSSCT00000064075	8,7,6,5,4,3	3:76693920-76697522|3:76714455-76720748
chr3	76711068	76714455	-	2	circRNA	ENSSSCT00000064075	4,3	3:76707647-76711068|3:76714455-76720748
chr3	77360558	77371938	-	4	circRNA	ENSSSCT00000044463	8,7,6,5	3:77353009-77360558|3:77371938-77375905
chr3	77360558	77391006	-	7	circRNA	ENSSSCT00000063303	8,7,6,5,4,3,2	3:77353009-77360558|3:77391006-77421547
chr3	77371815	77391006	-	5	circRNA	ENSSSCT00000063303	6,5,4,3,2	3:77366185-77371815|3:77391006-77421547
chr3	77378252	77391006	-	2	circRNA	ENSSSCT00000063303	3,2	3:77376502-77378252|3:77391006-77421547
chr3	77901880	77928476	+	8	circRNA	ENSSSCT00000029984	5,6,7,8,9,10,11,12	3:77887860-77901880|3:77928476-77936960
chr3	77901880	77946126	+	12	circRNA	ENSSSCT00000029984	5,6,7,8,9,10,11,12,13,14,15,16	3:77887860-77901880|3:77946126-77953413
chr3	77944467	77946126	+	3	circRNA	ENSSSCT00000029984	14,15,16	3:77937301-77944467|3:77946126-77953413
chr3	78013713	78014790	-	2	circRNA	ENSSSCT00000063992	3,2	3:77986795-78013713|3:78014790-78030436
chr3	78625007	78628473	+	2	circRNA	ENSSSCT00000066039	11,12	3:78604950-78625007|3:78628473-78693093
chr3	78952889	78958596	-	4	circRNA	ENSSSCT00000061355	20,19,18,17	3:78916494-78952889|3:78958596-78962924
chr3	78952889	78963032	-	5	circRNA	ENSSSCT00000061355	20,19,18,17,16	3:78916494-78952889|3:78963032-78971736
chr3	78952889	78971884	-	6	circRNA	ENSSSCT00000061355	20,19,18,17,16,15	3:78916494-78952889|3:78971884-78998505
chr3	78998505	79012545	-	4	circRNA	ENSSSCT00000061355	14,13,12,11	3:78971884-78998505|3:79012545-79072801
chr3	79005675	79011131	-	2	circRNA	ENSSSCT00000061355	13,12	3:78998646-79005675|3:79011131-79012366
chr3	79965737	79966904	+	1	circRNA	ENSSSCT00000048455	4	3:79962646-79965737|3:79966904-79967239
chr3	80259116	80281743	+	4	circRNA	ENSSSCT00000065655	3,4,5,6	3:80255829-80259116|3:80281743-80281981
chr3	80265088	80268798	+	2	circRNA	ENSSSCT00000065655	4,5	3:80259248-80265088|3:80268798-80281681
chr3	80290982	80295248	+	4	circRNA	ENSSSCT00000065655	18,19,20,21	3:80290380-80290982|3:80295248-80296584
chr3	80295053	80297962	+	5	circRNA	ENSSSCT00000065655	21,22,23,24,25	3:80292052-80295053|3:80297962-80299171
chr3	80371235	80390801	+	4	circRNA	ENSSSCT00000028791	2,3,4,5	3:80331880-80371235|3:80390801-80403961
chr3	80475788	80483180	+	6	circRNA	ENSSSCT00000028791	28,29,30,31,32,33	3:80466173-80475788|3:80483180-80490801
chr3	80503611	80514662	+	4	circRNA	ENSSSCT00000028791	40,41,42,43	3:80501520-80503611|3:80514662-80518275
chr3	80518275	80520643	+	4	circRNA	ENSSSCT00000028791	44,45,46,47	3:80514662-80518275|3:80520643-80521465
chr3	80559379	80569378	+	5	circRNA	ENSSSCT00000028791	68,69,70,71,72	3:80554208-80559379|3:80569378-80571252
chr3	80716884	80738790	-	5	circRNA	ENSSSCT00000009183	6,5,4,3,2	3:80714147-80716884|3:80738790-80746131
chr3	80795077	80800559	+	3	circRNA	ENSSSCT00000057933	2,3,4	3:80791641-80795077|3:80800559-80833995
chr3	80878997	80899312	-	6	circRNA	ENSSSCT00000054060	8,7,6,5,4,3	3:80878571-80878997|3:80899312-80901647
chr3	80880274	80880696	-	2	circRNA	ENSSSCT00000054060	7,6	3:80879066-80880274|3:80880696-80881971
chr3	80880274	80882112	-	3	circRNA	ENSSSCT00000054060	7,6,5	3:80879066-80880274|3:80882112-80892874
chr3	81204940	81205270	+	1	circRNA	ENSSSCT00000009189	3	3:81197989-81204940|3:81205270-81280148
chr3	83349427	83358984	+	4	circRNA	ENSSSCT00000059199	2,3,4,5	3:83337410-83349427|3:83358984-83379413
chr3	83349427	83384802	+	6	circRNA	ENSSSCT00000059199	2,3,4,5,6,7	3:83337410-83349427|3:83384802-83430344
chr3	83494201	83534429	-	6	circRNA	ENSSSCT00000009192	8,7,6,5,4,3	3:83468126-83494201|3:83534429-83535940
chr3	85155810	85156765	-	1	circRNA	ENSSSCT00000009193	2	3:85002385-85155810|3:85156765-85164708
chr3	85611404	85622090	+	5	circRNA	ENSSSCT00000055752	11,12,13,14,15	3:85610876-85611404|3:85622090-85623238
chr3	85623238	85631657	+	10	circRNA	ENSSSCT00000055752	16,17,18,19,20,21,22,23,24,25	3:85622090-85623238|3:85631657-85633062
chr3	85628508	85635656	+	8	circRNA	ENSSSCT00000055752	20,21,22,23,24,25,26,27	3:85627940-85628508|3:85635656-85636878
chr3	85663514	85679444	+	5	circRNA	ENSSSCT00000009195	4,5,6,7,8	3:85651949-85663514|3:85679444-85687602
chr3	85676290	85679444	+	3	circRNA	ENSSSCT00000009195	6,7,8	3:85672247-85676290|3:85679444-85687602
chr3	85677810	85679444	+	2	circRNA	ENSSSCT00000009195	7,8	3:85676368-85677810|3:85679444-85687602
chr3	85687602	85691878	+	3	circRNA	ENSSSCT00000009195	9,10,11	3:85679444-85687602|3:85691878-85695086
chr3	85699763	85702619	+	3	circRNA	ENSSSCT00000009195	14,15,16	3:85696624-85699763|3:85702619-85708538
chr3	85889606	85908629	+	8	circRNA	ENSSSCT00000045661	14,15,16,17,18,19,20,21	3:85884696-85889606|3:85908629-85911925
chr3	85889606	85938096	+	18	circRNA	ENSSSCT00000065372	14,15,16,17,18,19,20,21,22,23,24,25,26,27,28,29,30,31	3:85884696-85889606|3:85938096-85938834
chr3	86259312	86261780	-	3	circRNA	ENSSSCT00000032131	38,37,36	3:86257543-86259312|3:86261780-86263852
chr3	86270847	86311603	-	8	circRNA	ENSSSCT00000028655	32,31,30,29,28,27,26,25	3:86266168-86270847|3:86311603-86319485
chr3	86297987	86298417	-	2	circRNA	ENSSSCT00000028655	28,27	3:86276419-86297987|3:86298417-86307975
chr3	87251849	87262951	+	4	circRNA	ENSSSCT00000048172	2,3,4,5	3:87232007-87251849|3:87262951-87272265
chr3	87273426	87310440	+	27	circRNA	ENSSSCT00000048172	7,8,9,10,11,12,13,14,15,16,17,18,19,20,21,22,23,24,25,26,27,28,29,30,31,32,33	3:87272329-87273426|3:87310440-87311543
chr3	87298790	87301882	+	5	circRNA	ENSSSCT00000048172	22,23,24,25,26	3:87297727-87298790|3:87301882-87303091
chr3	87299326	87301882	+	4	circRNA	ENSSSCT00000048172	23,24,25,26	3:87298847-87299326|3:87301882-87303091
chr3	87299326	87310440	+	11	circRNA	ENSSSCT00000048172	23,24,25,26,27,28,29,30,31,32,33	3:87298847-87299326|3:87310440-87311543
chr3	87305852	87307407	+	2	circRNA	ENSSSCT00000048172	28,29	3:87303223-87305852|3:87307407-87308887
chr3	87308887	87310440	+	4	circRNA	ENSSSCT00000048172	30,31,32,33	3:87307407-87308887|3:87310440-87311543
chr3	87311543	87312575	+	2	circRNA	ENSSSCT00000048172	34,35	3:87310440-87311543|3:87312575-87313342
chr3	87328899	87330087	+	2	circRNA	ENSSSCT00000048172	42,43	3:87320646-87328899|3:87330087-87332379
chr3	87369570	87371772	-	3	circRNA	ENSSSCT00000037232	10,9,8	3:87366830-87369570|3:87371772-87375815
chr3	87369570	87380823	-	9	circRNA	ENSSSCT00000051288	11,10,9,8,7,6,5,4,3	3:87366830-87369570|3:87380823-87382308
chr3	87379727	87382413	-	3	circRNA	ENSSSCT00000037232	4,3,2	3:87378238-87379727|3:87382413-87389458
chr3	87419738	87425067	+	2	circRNA	ENSSSCT00000009215	2,3	3:87390015-87419738|3:87425067-87445727
chr3	92283613	92299786	-	3	circRNA	ENSSSCT00000025707	4,3,2	3:92274720-92283613|3:92299786-92336678
chr3	92299235	92299786	-	1	circRNA	ENSSSCT00000025707	2	3:92287400-92299235|3:92299786-92336678
chr3	92761994	92762903	+	3	circRNA	ENSSSCT00000028062	2,3,4	3:92697444-92761994|3:92762903-92764452
chr3	92761994	92764582	+	4	circRNA	ENSSSCT00000028062	2,3,4,5	3:92697444-92761994|3:92764582-92766371
chr3	92779850	92782233	+	3	circRNA	ENSSSCT00000028062	12,13,14	3:92768371-92779850|3:92782233-92784479
chr3	93172425	93179511	-	5	circRNA	ENSSSCT00000061463	8,7,6,5,4	3:93170253-93172425|3:93179511-93180880
chr3	93174831	93176432	-	2	circRNA	ENSSSCT00000061463	7,6	3:93172470-93174831|3:93176432-93178275
chr3	93174831	93179511	-	4	circRNA	ENSSSCT00000061463	7,6,5,4	3:93172470-93174831|3:93179511-93180880
chr3	93174831	93181510	-	6	circRNA	ENSSSCT00000061463	7,6,5,4,3,2	3:93172470-93174831|3:93181510-93185134
chr3	93383881	93384222	+	2	circRNA	ENSSSCT00000009234	3,4	3:93377361-93383881|3:93384222-93384568
chr3	93383881	93384704	+	3	circRNA	ENSSSCT00000009234	3,4,5	3:93377361-93383881|3:93384704-93385722
chr3	94534267	94542205	-	4	circRNA	ENSSSCT00000009246	6,5,4,3	3:94519807-94534267|3:94542205-94668650
chr3	94668650	94674179	-	2	circRNA	ENSSSCT00000058836	2,1	3:94542205-94668650|None
chr3	94934783	94946499	+	5	circRNA	ENSSSCT00000044314	5,6,7,8,9	3:94922899-94934783|3:94946499-94958829
chr3	95104013	95109324	+	2	circRNA	ENSSSCT00000044314	17,18	3:95046368-95104013|3:95109324-95129424
chr3	96249367	96260927	-	3	circRNA	ENSSSCT00000009253	5,4,3	3:96238718-96249367|3:96260927-96266854
chr3	96497330	96513038	+	8	circRNA	ENSSSCT00000009254	7,8,9,10,11,12,13,14	3:96496497-96497330|3:96513038-96525023
chr3	97013523	97048096	+	3	circRNA	ENSSSCT00000009261	26,27,28	3:96972072-97013523|3:97048096-97093419
chr3	97047927	97093535	+	2	circRNA	ENSSSCT00000009261	28,29	3:97015474-97047927|3:97093535-97117716
chr3	98033104	98064327	-	11	circRNA	ENSSSCT00000043652	17,16,15,14,13,12,11,10,9,8,7	3:98021792-98033104|3:98064327-98071360
chr3	98047437	98064327	-	7	circRNA	ENSSSCT00000043652	13,12,11,10,9,8,7	3:98035710-98047437|3:98064327-98071360
chr3	98047437	98074295	-	10	circRNA	ENSSSCT00000043652	13,12,11,10,9,8,7,6,5,4	3:98035710-98047437|3:98074295-98077665
chr3	99897135	99898967	+	1	circRNA	ENSSSCT00000044748	3	3:99877758-99897135|3:99898967-100155801
chr3	100156441	100174216	+	4	circRNA	ENSSSCT00000039359	3,4,5,6	3:99898967-100156441|3:100174216-100197659
chr3	100169950	100174216	+	2	circRNA	ENSSSCT00000044748	6,7	3:100159874-100169950|3:100174216-100197659
chr3	101048378	101066182	+	9	circRNA	ENSSSCT00000009277	20,21,22,23,24,25,26,27,28	3:101044612-101048378|3:101066182-101067464
chr3	101049945	101051600	+	2	circRNA	ENSSSCT00000009277	21,22	3:101048421-101049945|3:101051600-101055018
chr3	101049945	101072734	+	10	circRNA	ENSSSCT00000009277	21,22,23,24,25,26,27,28,29,30	3:101048421-101049945|3:101072734-101076011
chr3	101051487	101058675	+	4	circRNA	ENSSSCT00000009277	22,23,24,25	3:101050105-101051487|3:101058675-101063977
chr3	101280510	101303076	+	6	circRNA	ENSSSCT00000009280	5,6,7,8,9,10	3:101274685-101280510|3:101303076-101322838
chr3	101288068	101324416	+	5	circRNA	ENSSSCT00000009280	8,9,10,11,12	3:101284611-101288068|3:101324416-101334379
chr3	101302792	101324416	+	4	circRNA	ENSSSCT00000009280	9,10,11,12	3:101288212-101302792|3:101324416-101334379
chr3	101344152	101349046	+	3	circRNA	ENSSSCT00000009280	18,19,20	3:101338955-101344152|3:101349046-101349512
chr3	101473925	101476500	+	3	circRNA	ENSSSCT00000027140	3,4,5	3:101468324-101473925|3:101476500-101478345
chr3	101473925	101480235	+	5	circRNA	ENSSSCT00000027140	3,4,5,6,7	3:101468324-101473925|3:101480235-101481903
chr3	101473925	101483253	+	7	circRNA	ENSSSCT00000027140	3,4,5,6,7,8,9	3:101468324-101473925|3:101483253-101487226
chr3	101519229	101525570	+	5	circRNA	ENSSSCT00000027140	18,19,20,21,22	3:101514153-101519229|3:101525570-101529464
chr3	101765609	101780247	+	7	circRNA	ENSSSCT00000036773	2,3,4,5,6,7,8	3:101753869-101765609|3:101780247-101785073
chr3	101765609	101790729	+	12	circRNA	ENSSSCT00000036773	2,3,4,5,6,7,8,9,10,11,12,13	3:101753869-101765609|3:101790729-101794291
chr3	102011753	102016634	+	4	circRNA	ENSSSCT00000009289	3,4,5,6	3:101990710-102011753|3:102016634-102018664
chr3	102849437	102850385	+	1	circRNA	ENSSSCT00000009297	2	3:102842328-102849437|3:102850385-102900936
chr3	102927402	102939552	+	6	circRNA	ENSSSCT00000009297	13,14,15,16,17,18	3:102924255-102927402|3:102939552-102941152
chr3	102948366	102950797	-	3	circRNA	ENSSSCT00000009296	10,9,8	3:102941417-102948366|3:102950797-102953381
chr3	103049363	103055415	+	6	circRNA	ENSSSCT00000034217	2,3,4,5,6,7	3:103041354-103049363|3:103055415-103058585
chr3	103051981	103055415	+	4	circRNA	ENSSSCT00000034217	4,5,6,7	3:103049985-103051981|3:103055415-103058585
chr3	103055082	103072816	+	6	circRNA	ENSSSCT00000034217	6,7,8,9,10,11	3:103054715-103055082|3:103072816-103074953
chr3	103074953	103078717	+	2	circRNA	ENSSSCT00000050794	12,13	3:103072816-103074953|3:103078717-103084462
chr3	103101044	103104717	-	4	circRNA	ENSSSCT00000009299	8,7,6,5	3:103100188-103101044|3:103104717-103105641
chr3	103116904	103139501	+	11	circRNA	ENSSSCT00000037227	3,4,5,6,7,8,9,10,11,12,13	3:103113145-103116904|3:103139501-103140013
chr3	103122208	103122320	+	1	ciRNA	ENSSSCT00000037227	5	3:103122208-103127504
chr3	103139401	103182286	+	13	circRNA	ENSSSCT00000037227	13,14,15,16,17,18,19,20,21,22,23,24,25	3:103138118-103139401|3:103182286-103183792
chr3	103146414	103152191	+	3	circRNA	ENSSSCT00000037227	17,18,19	3:103143014-103146414|3:103152191-103155535
chr3	103155535	103183861	+	7	circRNA	ENSSSCT00000037227	20,21,22,23,24,25,26	3:103152191-103155535|3:103183861-103194843
chr3	103207971	103226098	+	6	circRNA	ENSSSCT00000037227	28,29,30,31,32,33	3:103195023-103207971|3:103226098-103229656
chr3	103315211	103340354	+	9	circRNA	ENSSSCT00000009301	8,9,10,11,12,13,14,15,16	3:103310703-103315211|3:103340354-103348385
chr3	103627585	103645093	-	2	circRNA	ENSSSCT00000009306	14,13	3:103620441-103627585|3:103645093-103650879
chr3	103644871	103656290	-	4	circRNA	ENSSSCT00000009306	13,12,11,10	3:103627780-103644871|3:103656290-103659226
chr3	103644871	103659383	-	5	circRNA	ENSSSCT00000009306	13,12,11,10,9	3:103627780-103644871|3:103659383-103669572
chr3	103704318	103773127	-	4	circRNA	ENSSSCT00000009306	5,4,3,2	3:103693529-103704318|3:103773127-103815044
chr3	106071304	106072601	+	2	circRNA	ENSSSCT00000009310	4,5	3:106067752-106071304|3:106072601-106073421
chr3	106122045	106144179	-	10	circRNA	ENSSSCT00000038612	12,11,10,9,8,7,6,5,4,3	3:106117765-106122045|3:106144179-106166084
chr3	106380538	106443851	-	13	circRNA	ENSSSCT00000009313	19,18,17,16,15,14,13,12,11,10,9,8,7	3:106353794-106380538|3:106443851-106452582
chr3	106416133	106443851	-	8	circRNA	ENSSSCT00000009313	14,13,12,11,10,9,8,7	3:106403928-106416133|3:106443851-106452582
chr3	106420300	106421290	-	2	circRNA	ENSSSCT00000062018	19,18	3:106416253-106420300|3:106421290-106422890
chr3	106872180	106892436	-	3	circRNA	ENSSSCT00000009315	12,11,10	3:106854617-106872180|3:106892436-106948657
chr3	106948657	106966336	-	4	circRNA	ENSSSCT00000009315	9,8,7,6	3:106892436-106948657|3:106966336-106983721
chr3	107056626	107077755	-	4	circRNA	ENSSSCT00000009316	69,68,67,66	3:107039020-107056626|3:107077755-107081474
chr3	107056626	107105816	-	16	circRNA	ENSSSCT00000009316	69,68,67,66,65,64,63,62,61,60,59,58,57,56,55,54	3:107039020-107056626|3:107105816-107107092
chr3	107072777	107105816	-	15	circRNA	ENSSSCT00000009316	68,67,66,65,64,63,62,61,60,59,58,57,56,55,54	3:107056837-107072777|3:107105816-107107092
chr3	107077537	107089319	-	6	circRNA	ENSSSCT00000009316	66,65,64,63,62,61	3:107073907-107077537|3:107089319-107095968
chr3	107077537	107096098	-	7	circRNA	ENSSSCT00000009316	66,65,64,63,62,61,60	3:107073907-107077537|3:107096098-107096800
chr3	107088099	107141679	-	29	circRNA	ENSSSCT00000009316	62,61,60,59,58,57,56,55,54,53,52,51,50,49,48,47,46,45,44,43,42,41,40,39,38,37,36,35,34	3:107087086-107088099|3:107141679-107143395
chr3	107095968	107096943	-	3	circRNA	ENSSSCT00000009316	60,59,58	3:107089319-107095968|3:107096943-107098824
chr3	107095968	107105816	-	7	circRNA	ENSSSCT00000009316	60,59,58,57,56,55,54	3:107089319-107095968|3:107105816-107107092
chr3	107120470	107124808	-	4	circRNA	ENSSSCT00000009316	46,45,44,43	3:107116494-107120470|3:107124808-107127682
chr3	107135277	107141679	-	3	circRNA	ENSSSCT00000009316	36,35,34	3:107134461-107135277|3:107141679-107143395
chr3	107146964	107147569	-	2	circRNA	ENSSSCT00000009316	29,28	3:107146105-107146964|3:107147569-107150198
chr3	107198688	107217077	-	5	circRNA	ENSSSCT00000009316	9,8,7,6,5	3:107191608-107198688|3:107217077-107220945
chr3	107198688	107226304	-	7	circRNA	ENSSSCT00000009316	9,8,7,6,5,4,3	3:107191608-107198688|3:107226304-107229224
chr3	107198688	107229406	-	8	circRNA	ENSSSCT00000009316	9,8,7,6,5,4,3,2	3:107191608-107198688|3:107229406-107269045
chr3	107207591	107229406	-	7	circRNA	ENSSSCT00000009316	8,7,6,5,4,3,2	3:107198747-107207591|3:107229406-107269045
chr3	107214186	107229406	-	5	circRNA	ENSSSCT00000009316	6,5,4,3,2	3:107208057-107214186|3:107229406-107269045
chr3	107317576	107324947	-	3	circRNA	ENSSSCT00000049366	4,3,2	3:107313496-107317576|3:107324947-107325711
chr3	107399144	107405392	-	5	circRNA	ENSSSCT00000038324	13,12,11,10,9	3:107391337-107399144|3:107405392-107409265
chr3	107402107	107410324	-	5	circRNA	ENSSSCT00000038324	11,10,9,8,7	3:107400536-107402107|3:107410324-107410924
chr3	107414843	107416547	-	2	circRNA	ENSSSCT00000038324	4,3	3:107413313-107414843|3:107416547-107421662
chr3	107449371	107459578	-	7	circRNA	ENSSSCT00000009321	17,16,15,14,13,12,11	3:107442715-107449371|3:107459578-107461180
chr3	107469179	107475903	-	4	circRNA	ENSSSCT00000009321	7,6,5,4	3:107462374-107469179|3:107475903-107484823
chr3	107587062	107600157	+	2	circRNA	ENSSSCT00000047389	3,4	3:107542925-107587062|3:107600157-107609925
chr3	107587062	107613737	+	4	circRNA	ENSSSCT00000047389	3,4,5,6	3:107542925-107587062|3:107613737-107635900
chr3	107587062	107636043	+	5	circRNA	ENSSSCT00000047389	3,4,5,6,7	3:107542925-107587062|3:107636043-107644665
chr3	107609925	107613737	+	2	circRNA	ENSSSCT00000047389	5,6	3:107600157-107609925|3:107613737-107635900
chr3	107609925	107636043	+	3	circRNA	ENSSSCT00000047389	5,6,7	3:107600157-107609925|3:107636043-107644665
chr3	107609925	107644742	+	4	circRNA	ENSSSCT00000047389	5,6,7,8	3:107600157-107609925|3:107644742-107654736
chr3	108003577	108014670	+	8	circRNA	ENSSSCT00000045303	2,3,4,5,6,7,8,9	3:107987237-108003577|3:108014670-108016401
chr3	108003577	108023983	+	13	circRNA	ENSSSCT00000045303	2,3,4,5,6,7,8,9,10,11,12,13,14	3:107987237-108003577|3:108023983-108026264
chr3	108007776	108016511	+	7	circRNA	ENSSSCT00000045303	4,5,6,7,8,9,10	3:108004706-108007776|3:108016511-108018595
chr3	108012084	108023983	+	8	circRNA	ENSSSCT00000045303	7,8,9,10,11,12,13,14	3:108009809-108012084|3:108023983-108026264
chr3	108014576	108016511	+	2	circRNA	ENSSSCT00000045303	9,10	3:108012912-108014576|3:108016511-108018595
chr3	108014576	108018780	+	3	circRNA	ENSSSCT00000045303	9,10,11	3:108012912-108014576|3:108018780-108020311
chr3	108038208	108049797	+	11	circRNA	ENSSSCT00000045303	22,23,24,25,26,27,28,29,30,31,32	3:108032365-108038208|3:108049797-108051390
chr3	108039821	108041488	+	3	circRNA	ENSSSCT00000045303	25,26,27	3:108039068-108039821|3:108041488-108043801
chr3	108040826	108041488	+	2	circRNA	ENSSSCT00000045303	26,27	3:108039917-108040826|3:108041488-108043801
chr3	108043801	108047974	+	4	circRNA	ENSSSCT00000045303	28,29,30,31	3:108041488-108043801|3:108047974-108049620
chr3	108045596	108047974	+	3	circRNA	ENSSSCT00000045303	29,30,31	3:108043854-108045596|3:108047974-108049620
chr3	110154011	110162667	-	3	circRNA	ENSSSCT00000059137	8,7,6	3:110147213-110154011|3:110162667-110164677
chr3	110335380	110344032	-	5	circRNA	ENSSSCT00000009340	9,8,7,6,5	3:110334246-110335380|3:110344032-110345025
chr3	110345025	110352347	-	2	circRNA	ENSSSCT00000009340	4,3	3:110344032-110345025|3:110352347-110357815
chr3	110442414	110455791	-	6	circRNA	ENSSSCT00000009345	8,7,6,5,4,3	3:110439529-110442414|3:110455791-110474324
chr3	110991213	110997758	-	3	circRNA	ENSSSCT00000060193	9,8,7	3:110935140-110991213|3:110997758-111101330
chr3	111200738	111288915	-	3	circRNA	ENSSSCT00000060193	4,3,2	3:111182531-111200738|3:111288915-111324824
chr3	112636836	112653047	-	6	circRNA	ENSSSCT00000023702	8,7,6,5,4,3	3:112635251-112636836|3:112653047-112653637
chr3	112848357	112871469	-	4	circRNA	ENSSSCT00000009379	5,4,3,2	3:112844708-112848357|3:112871469-112923530
chr3	113091744	113131647	+	3	circRNA	ENSSSCT00000009382	2,3,4	3:113045247-113091744|3:113131647-113142604
chr3	113142604	113148454	+	3	circRNA	ENSSSCT00000009382	5,6,7	3:113131647-113142604|3:113148454-113158462
chr3	113142604	113158626	+	4	circRNA	ENSSSCT00000009382	5,6,7,8	3:113131647-113142604|3:113158626-113162565
chr3	113259004	113276969	+	3	circRNA	ENSSSCT00000057606	2,3,4	3:113229359-113259004|3:113276969-113299579
chr3	113259004	113299665	+	4	circRNA	ENSSSCT00000057606	2,3,4,5	3:113229359-113259004|3:113299665-113309398
chr3	113259004	113309553	+	5	circRNA	ENSSSCT00000057606	2,3,4,5,6	3:113229359-113259004|3:113309553-113319910
chr3	113259004	113324246	+	7	circRNA	ENSSSCT00000057606	2,3,4,5,6,7,8	3:113229359-113259004|3:113324246-113363056
chr3	113259004	113363181	+	8	circRNA	ENSSSCT00000057606	2,3,4,5,6,7,8,9	3:113229359-113259004|3:113363181-113418181
chr3	113259004	113397814	+	10	circRNA	ENSSSCT00000038297	2,3,4,5,6,7,8,9,10,11	3:113229359-113259004|3:113397814-113414271
chr3	113268077	113276969	+	3	circRNA	ENSSSCT00000038297	3,4,5	3:113259072-113268077|3:113276969-113299579
chr3	113268077	113363181	+	8	circRNA	ENSSSCT00000038297	3,4,5,6,7,8,9,10	3:113259072-113268077|3:113363181-113397736
chr3	113272702	113276969	+	2	circRNA	ENSSSCT00000057606	3,4	3:113259072-113272702|3:113276969-113299579
chr3	113272702	113299665	+	3	circRNA	ENSSSCT00000057606	3,4,5	3:113259072-113272702|3:113299665-113309398
chr3	113272702	113309553	+	4	circRNA	ENSSSCT00000057606	3,4,5,6	3:113259072-113272702|3:113309553-113319910
chr3	113272702	113324246	+	6	circRNA	ENSSSCT00000057606	3,4,5,6,7,8	3:113259072-113272702|3:113324246-113363056
chr3	113272702	113363181	+	7	circRNA	ENSSSCT00000057606	3,4,5,6,7,8,9	3:113259072-113272702|3:113363181-113418181
chr3	113272702	113397814	+	8	circRNA	ENSSSCT00000038297	4,5,6,7,8,9,10,11	3:113268184-113272702|3:113397814-113414271
chr3	113319910	113363181	+	3	circRNA	ENSSSCT00000057606	7,8,9	3:113309553-113319910|3:113363181-113418181
chr3	113363056	113397814	+	2	circRNA	ENSSSCT00000038297	10,11	3:113324246-113363056|3:113397814-113414271
chr3	114008082	114036543	-	7	circRNA	ENSSSCT00000009390	19,18,17,16,15,14,13	3:114004256-114008082|3:114036543-114048863
chr3	114014185	114024455	-	2	circRNA	ENSSSCT00000009390	18,17	3:114008266-114014185|3:114024455-114026676
chr3	114014185	114026778	-	3	circRNA	ENSSSCT00000009390	18,17,16	3:114008266-114014185|3:114026778-114032326
chr3	114024052	114026778	-	2	circRNA	ENSSSCT00000009390	17,16	3:114014360-114024052|3:114026778-114032326
chr3	114408881	114410399	+	2	circRNA	ENSSSCT00000009393	5,6	3:114407276-114408881|3:114410399-114416919
chr3	114424560	114472373	+	13	circRNA	ENSSSCT00000063673	12,13,14,15,16,17,18,19,20,21,22,23,24	3:114422084-114424560|3:114472373-114472501
chr3	114562188	114573941	-	5	circRNA	ENSSSCT00000037752	7,6,5,4,3	3:114541909-114562188|3:114573941-114576855
chr3	114743497	114749286	+	4	circRNA	ENSSSCT00000009403	2,3,4,5	3:114722865-114743497|3:114749286-114751269
chr3	114743497	114751378	+	5	circRNA	ENSSSCT00000009403	2,3,4,5,6	3:114722865-114743497|3:114751378-114754918
chr3	114743497	114755035	+	6	circRNA	ENSSSCT00000009403	2,3,4,5,6,7	3:114722865-114743497|3:114755035-114757806
chr3	114743497	114765885	+	11	circRNA	ENSSSCT00000009403	2,3,4,5,6,7,8,9,10,11,12	3:114722865-114743497|3:114765885-114770658
chr3	114743497	114785114	+	16	circRNA	ENSSSCT00000009403	2,3,4,5,6,7,8,9,10,11,12,13,14,15,16,17	3:114722865-114743497|3:114785114-114790888
chr3	114743497	114791075	+	17	circRNA	ENSSSCT00000009403	2,3,4,5,6,7,8,9,10,11,12,13,14,15,16,17,18	3:114722865-114743497|3:114791075-114802260
chr3	114743497	114802446	+	18	circRNA	ENSSSCT00000009403	2,3,4,5,6,7,8,9,10,11,12,13,14,15,16,17,18,19	3:114722865-114743497|3:114802446-114807968
chr3	114746563	114755035	+	5	circRNA	ENSSSCT00000009403	3,4,5,6,7	3:114743649-114746563|3:114755035-114757806
chr3	114747244	114755035	+	4	circRNA	ENSSSCT00000009403	4,5,6,7	3:114746613-114747244|3:114755035-114757806
chr3	114783338	114785114	+	2	circRNA	ENSSSCT00000009403	16,17	3:114777940-114783338|3:114785114-114790888
chr3	114783338	114791075	+	3	circRNA	ENSSSCT00000009403	16,17,18	3:114777940-114783338|3:114791075-114802260
chr3	114783338	114802446	+	4	circRNA	ENSSSCT00000009403	16,17,18,19	3:114777940-114783338|3:114802446-114807968
chr3	114784978	114791075	+	2	circRNA	ENSSSCT00000009403	17,18	3:114783650-114784978|3:114791075-114802260
chr3	117885520	117900196	+	4	circRNA	ENSSSCT00000050255	2,3,4,5	3:117857982-117885520|3:117900196-117903318
chr3	117885520	117903927	+	6	circRNA	ENSSSCT00000050255	2,3,4,5,6,7	3:117857982-117885520|3:117903927-117911197
chr3	117885520	117911323	+	7	circRNA	ENSSSCT00000050255	2,3,4,5,6,7,8	3:117857982-117885520|3:117911323-117913864
chr3	117899268	117903927	+	4	circRNA	ENSSSCT00000050255	4,5,6,7	3:117894357-117899268|3:117903927-117911197
chr3	117952013	117953796	+	2	circRNA	ENSSSCT00000050255	14,15	3:117950053-117952013|3:117953796-117956761
chr3	117952013	117958024	+	5	circRNA	ENSSSCT00000050255	14,15,16,17,18	3:117950053-117952013|3:117958024-117960284
chr3	117957530	117958024	+	2	circRNA	ENSSSCT00000050255	17,18	3:117956899-117957530|3:117958024-117960284
chr3	118237707	118256221	+	7	circRNA	ENSSSCT00000009415	13,14,15,16,17,18,19	3:118231194-118237707|3:118256221-118257354
chr3	118245766	118250998	+	2	circRNA	ENSSSCT00000040514	13,14	3:118244726-118245766|3:118250998-118255579
chr3	120105567	120132535	+	14	circRNA	ENSSSCT00000055247	2,3,4,5,6,7,8,9,10,11,12,13,14,15	3:120097576-120105567|3:120132535-120139955
chr3	120115901	120125630	+	6	circRNA	ENSSSCT00000055247	5,6,7,8,9,10	3:120111249-120115901|3:120125630-120129661
chr3	120141625	120148629	+	4	circRNA	ENSSSCT00000055247	17,18,19,20	3:120140070-120141625|3:120148629-120152172
chr3	121826218	121830238	-	2	circRNA	ENSSSCT00000009430	21,20	3:121824417-121826218|3:121830238-121832142
chr3	121848911	121853120	-	4	circRNA	ENSSSCT00000009430	6,5,4,3	3:121847327-121848911|3:121853120-121853668
chr3	122013364	122035442	+	5	circRNA	ENSSSCT00000009432	20,21,22,23,24	3:121988417-122013364|3:122035442-122043194
chr3	122118084	122188128	+	10	circRNA	ENSSSCT00000009432	37,38,39,40,41,42,43,44,45,46	3:122094251-122118084|3:122188128-122199905
chr3	122129712	122133932	+	2	circRNA	ENSSSCT00000009432	39,40	3:122118786-122129712|3:122133932-122142319
chr3	122142319	122188128	+	6	circRNA	ENSSSCT00000009432	41,42,43,44,45,46	3:122133932-122142319|3:122188128-122199905
chr3	124954065	124988124	-	12	circRNA	ENSSSCT00000009435	17,16,15,14,13,12,11,10,9,8,7,6	3:124948225-124954065|3:124988124-124995268
chr3	124965486	124988124	-	11	circRNA	ENSSSCT00000009435	16,15,14,13,12,11,10,9,8,7,6	3:124954218-124965486|3:124988124-124995268
chr3	125140291	125141259	-	2	circRNA	ENSSSCT00000022725	12,11	3:125139416-125140291|3:125141259-125142688
chr3	125260601	125264309	+	3	circRNA	ENSSSCT00000028641	3,4,5	3:125257187-125260601|3:125264309-125267375
chr3	125766788	125767951	+	3	circRNA	ENSSSCT00000009445	6,7,8	3:125764063-125766788|3:125767951-125769042
chr3	125867279	125900323	+	12	circRNA	ENSSSCT00000061079	2,3,4,5,6,7,8,9,10,11,12,13	3:125861643-125867279|3:125900323-125929695
chr3	125886850	125892174	+	3	circRNA	ENSSSCT00000061079	10,11,12	3:125882428-125886850|3:125892174-125900270
chr3	125889256	125943717	+	9	circRNA	ENSSSCT00000061079	11,12,13,14,15,16,17,18,19	3:125886929-125889256|3:125943717-125953110
chr3	125929695	125943717	+	6	circRNA	ENSSSCT00000061079	14,15,16,17,18,19	3:125900323-125929695|3:125943717-125953110
chr3	125933709	125943717	+	5	circRNA	ENSSSCT00000061079	15,16,17,18,19	3:125929822-125933709|3:125943717-125953110
chr3	125943042	125943717	+	2	circRNA	ENSSSCT00000061079	18,19	3:125935539-125943042|3:125943717-125953110
[truncated: 5,868 more rows]

## Sheet: circRNA_finder
Identification of circRNAs by circRNA_finder
Chrom	Start	End	The number reads spanning each junction	Strand
chr1	10905	18696	1	-
chr1	24931	25868	1	+
chr1	27359	33429	2	+
chr1	128197	132692	1	-
chr1	593017	598149	1	+
chr1	593017	611340	1	+
chr1	593017	619011	1	+
chr1	626316	653683	1	+
chr1	641933	653683	1	+
chr1	641933	699595	1	+
chr1	641933	688177	1	+
chr1	1600086	1663793	1	-
chr1	1600086	1620039	1	-
chr1	1600086	1611154	1	-
chr1	1633213	1663793	1	-
chr1	1633213	1634815	1	-
chr1	1639165	1663793	1	-
chr1	1654691	1663793	6	-
chr1	1657902	1663793	3	-
chr1	2552567	2552792	2	+
chr1	3314471	3324464	1	+
chr1	4775754	4843415	1	-
chr1	5915501	5922642	1	+
chr1	6894077	6899495	2	-
chr1	7130416	7198796	2	-
chr1	7429735	7433694	1	-
chr1	7594611	7598381	3	+
chr1	7594611	7599773	1	+
chr1	7682746	7687499	2	+
chr1	7684075	7688786	2	+
chr1	8434506	8444226	1	+
chr1	8586432	8598060	1	-
chr1	8692073	8698741	1	-
chr1	8822876	8825081	1	-
chr1	8949348	8964165	1	+
chr1	9034251	9041185	1	-
chr1	9060509	9069255	1	-
chr1	9191140	9195425	1	-
chr1	9191140	9192687	1	-
chr1	9570464	9572299	1	-
chr1	9893444	9923857	1	-
chr1	10161697	10175846	1	-
chr1	12041131	12043885	3	-
chr1	12041131	12042596	2	-
chr1	12041135	12043885	1	-
chr1	12056479	12061089	1	-
chr1	12071469	12074918	1	-
chr1	12361986	12376129	1	+
chr1	12381441	12388087	1	+
chr1	13449104	13456999	1	+
chr1	13976186	13984651	1	+
chr1	14046057	14047923	1	+
chr1	14165761	14167020	1	+
chr1	14373231	14374308	1	-
chr1	14373972	14416451	1	-
chr1	14373972	14374308	1	-
chr1	14416334	14457143	2	-
chr1	14416334	14465242	1	-
chr1	14416334	14476051	1	-
chr1	14645907	14708965	1	-
chr1	15130348	15138492	2	+
chr1	15442941	15443446	1	-
chr1	16025196	16045702	1	+
chr1	16255229	16256925	1	+
chr1	16307507	16307993	3	+
chr1	16335744	16337886	1	+
chr1	16366074	16371076	1	-
chr1	16370924	16374414	1	-
chr1	16406040	16420284	1	+
chr1	16558807	16566086	2	-
chr1	16584463	16585454	1	-
chr1	17372567	17386654	1	-
chr1	17372567	17463579	1	-
chr1	17372567	17416764	3	-
chr1	17372567	17382520	1	-
chr1	17443095	17443411	1	-
chr1	17452507	17505562	1	-
chr1	17463450	17466968	1	-
chr1	18987937	19005183	1	-
chr1	19688505	19689513	1	+
chr1	20549776	20617175	1	-
chr1	20549776	20567142	1	-
chr1	20776416	20798556	1	-
chr1	20782262	20798556	1	-
chr1	20803182	20804689	1	-
chr1	20821001	20826456	1	-
chr1	20841195	20910141	1	-
chr1	20869921	20876823	1	-
chr1	20880685	20888975	1	-
chr1	20908951	20913116	1	-
chr1	20908951	20917634	1	-
chr1	21445574	21475169	1	-
chr1	21779718	21781094	1	-
chr1	22268061	22352249	1	+
chr1	22274445	22352249	1	+
chr1	22339485	22339784	1	+
chr1	22687198	22695713	2	-
chr1	22697936	22706363	1	-
chr1	22719643	22735094	1	-
chr1	22731267	22756500	2	-
chr1	22731267	22735094	1	-
chr1	22880594	22901667	1	-
chr1	25282322	25312188	1	-
chr1	25526209	25528664	1	+
chr1	27450520	27478260	1	+
chr1	27472675	27478260	2	+
chr1	27589738	27597287	1	+
chr1	27611599	27699498	2	+
chr1	27892403	27899982	2	+
chr1	27966284	27975041	1	-
chr1	28572082	28574012	1	+
chr1	28982359	29027965	1	+
chr1	29018350	29042644	1	+
chr1	29027847	29042644	2	+
chr1	29027847	29046743	1	+
chr1	31971720	31991763	1	+
chr1	31980771	31991763	2	+
chr1	31980771	31984604	1	+
chr1	31980771	31982095	1	+
chr1	32238488	32242550	1	-
chr1	32299904	32354628	1	-
chr1	32520012	32522430	2	+
chr1	33217619	33315782	1	-
chr1	33271333	33278592	2	-
chr1	33280749	33284458	1	-
chr1	33651341	33695033	1	+
chr1	33651341	33696120	2	+
chr1	33664668	33681370	1	+
chr1	33672927	33696120	3	+
chr1	33672927	33710494	1	+
chr1	33672927	33685503	2	+
chr1	33672927	33676063	1	+
chr1	33672927	33688533	1	+
chr1	33672927	33681370	1	+
chr1	33675971	33688533	1	+
chr1	33867865	33871016	1	-
chr1	33884805	33901143	1	-
chr1	34532142	34541565	2	-
chr1	34630096	34724992	2	+
chr1	34896731	34976153	1	+
chr1	34973378	35034972	1	+
chr1	35005531	35034972	2	+
chr1	35034678	35034972	1	+
chr1	35131946	35158957	1	+
chr1	35131946	35145478	1	+
chr1	35131946	35216500	1	+
chr1	35138979	35158957	1	+
chr1	36964150	36994867	2	-
chr1	36964150	36978525	1	-
chr1	36985760	36994867	1	-
chr1	36986916	36994867	1	-
chr1	36986916	36987551	3	-
chr1	36987551	36987792	1	-
chr1	37122168	37182851	1	-
chr1	39944933	39955868	2	-
chr1	40116744	40119904	1	+
chr1	40134575	40137899	2	+
chr1	40157757	40164224	1	-
chr1	41076031	41095392	2	+
chr1	41095323	41149254	1	+
chr1	41144281	41164096	1	+
chr1	41144281	41177466	1	+
chr1	41144281	41180922	1	+
chr1	41144281	41149254	1	+
chr1	41199751	41230402	1	+
chr1	41199751	41247966	1	+
chr1	41219695	41230402	1	+
chr1	41869148	41919287	1	-
chr1	42730227	42787786	1	+
chr1	44152201	44154573	1	-
chr1	44163929	44171097	2	-
chr1	44264933	44279238	2	+
chr1	44270419	44276727	1	+
chr1	44305882	44329819	1	-
chr1	44307396	44309527	3	-
chr1	44323600	44350272	1	-
chr1	44928512	44935340	1	-
chr1	45173523	45175282	3	+
chr1	45173523	45175843	1	+
chr1	45173523	45177436	1	+
chr1	45173526	45175282	1	+
chr1	45173526	45177436	1	+
chr1	45173526	45175843	1	+
chr1	45175189	45175843	2	+
chr1	49916144	49932071	1	-
chr1	50470735	50471100	1	-
chr1	50758697	50827798	3	+
chr1	50828903	50832203	3	+
chr1	50832069	50838859	1	+
chr1	50832069	50870956	1	+
chr1	50870875	50933259	1	+
chr1	51404491	51406069	1	-
chr1	51970350	51971038	1	+
chr1	52101178	52137815	2	+
chr1	52123107	52152735	1	+
chr1	52123107	52179177	1	+
chr1	52130361	52179177	1	+
chr1	52130361	52152735	1	+
chr1	52134345	52179177	4	+
chr1	52146556	52179177	1	+
chr1	52146556	52152735	1	+
chr1	52714315	52800752	1	+
chr1	53152425	53157947	1	+
chr1	53273525	53274964	1	+
chr1	53378682	53388118	1	-
chr1	53382543	53388118	1	-
chr1	53382543	53440883	1	-
chr1	53396206	53413955	2	-
chr1	53396206	53440883	1	-
chr1	53397626	53413955	2	-
chr1	53397626	53397909	1	-
chr1	53401860	53422321	1	-
chr1	53409337	53422321	2	-
chr1	53409337	53425327	1	-
chr1	53409337	53413955	1	-
chr1	53419652	53422321	1	-
chr1	53419652	53425327	1	-
chr1	53861602	53862481	1	-
chr1	54411742	54496434	1	-
chr1	54461975	54469709	1	-
chr1	54461975	54529700	1	-
chr1	54461975	54494313	1	-
chr1	54465939	54509899	1	-
chr1	54477710	54511387	1	-
chr1	54494180	54502778	1	-
chr1	54528561	54529700	1	-
chr1	54567657	54581212	1	-
chr1	54576237	54581212	3	-
chr1	54576237	54576836	1	-
chr1	55666251	55669095	3	+
chr1	55906697	55908943	1	-
chr1	55937065	55954186	1	-
chr1	55987754	55990145	1	+
chr1	56001861	56034992	2	+
chr1	56065551	56065762	1	-
chr1	56901360	56979996	1	-
chr1	56960509	57031666	1	-
chr1	56960509	56998082	1	-
chr1	56960509	57037382	1	-
chr1	56987429	57037382	1	-
chr1	57030071	57037254	1	-
chr1	57385548	57393736	2	-
chr1	57392228	57393736	2	-
chr1	57506363	57506563	1	+
chr1	57702834	57704684	2	-
chr1	57782426	57788353	1	-
chr1	57782426	57785737	1	-
chr1	57788271	57796014	2	-
chr1	57800377	57800994	1	-
chr1	57845046	57850879	1	+
chr1	57848454	57850879	1	+
chr1	58519671	58523658	2	-
chr1	62911461	62916371	1	+
chr1	65879715	65911662	1	-
chr1	65919747	65921100	1	-
chr1	66353975	66356192	1	-
chr1	66356092	66364270	1	-
chr1	66358762	66360969	1	-
chr1	66395162	66445570	1	-
chr1	66487804	66492995	3	-
chr1	67450987	67455592	2	-
chr1	67487237	67564299	1	-
chr1	67542130	67594456	1	-
chr1	67549096	67578266	1	-
chr1	67576478	67578266	1	-
chr1	71002779	71039726	1	-
chr1	71059256	71082722	1	-
chr1	72706052	72717959	1	+
chr1	72706052	72738156	1	+
chr1	72712126	72738156	1	+
chr1	72712126	72717959	1	+
chr1	72733010	72738156	1	+
chr1	72737791	72738156	1	+
chr1	72822493	72828469	1	+
chr1	73212630	73217249	2	-
chr1	74028417	74035454	1	-
chr1	74028417	74030320	2	-
chr1	74043727	74052367	1	-
chr1	74045954	74052367	1	-
chr1	74314097	74322235	1	+
chr1	74404667	74420651	1	+
chr1	74428873	74440246	1	+
chr1	74483176	74503320	1	+
chr1	74503237	74545066	1	+
chr1	74598004	74677375	1	+
chr1	74737036	74738472	3	+
chr1	74757655	74758252	1	+
chr1	75718075	75731720	2	+
chr1	75718075	75739270	1	+
chr1	75753868	75759232	2	+
chr1	76215148	76223008	1	+
chr1	76222892	76223628	1	+
chr1	76632268	76632620	2	-
chr1	76649381	76651641	2	-
chr1	76723119	76750287	2	-
chr1	76723119	76727151	1	-
chr1	76920941	76936185	1	+
chr1	76920941	76929512	1	+
chr1	77086748	77087208	1	+
chr1	77215897	77279692	1	-
chr1	77234824	77236972	1	-
chr1	77239633	77270404	1	-
chr1	77263698	77270404	2	-
chr1	77263698	77302848	1	-
chr1	77270211	77276787	1	-
chr1	77284221	77288358	1	-
chr1	77302728	77394243	1	-
chr1	77578906	77583300	1	-
chr1	78080586	78083345	1	-
chr1	78109182	78149434	1	-
chr1	79879035	79879318	1	-
chr1	81692119	81692454	1	-
chr1	82022944	82023413	1	+
chr1	83059591	83085263	1	-
chr1	83061355	83063345	1	-
chr1	83295221	83295734	1	+
chr1	84000859	84007243	1	+
chr1	84000859	84009228	1	+
chr1	84536322	84558464	4	-
chr1	84829981	84849024	1	+
chr1	85926480	85964180	1	-
chr1	85961742	85964180	1	-
chr1	86085545	86099977	1	-
chr1	86098772	86101740	1	-
chr1	87134226	87153004	4	+
chr1	87147763	87178553	1	+
chr1	87177831	87178553	1	+
chr1	87188623	87219085	1	+
chr1	87192386	87201468	1	+
chr1	87210272	87212987	1	+
chr1	87218023	87218361	1	+
chr1	87225157	87237408	1	+
chr1	90023733	90035887	2	-
chr1	90029808	90040011	1	-
chr1	90032152	90041679	1	-
chr1	90035713	90046759	1	-
chr1	90055646	90057102	1	-
chr1	90167979	90210172	1	-
chr1	90172371	90193314	1	-
chr1	90192975	90203785	1	-
chr1	90220787	90269663	1	-
chr1	90254629	90255853	1	-
chr1	90438375	90439203	1	+
chr1	90816716	90819974	1	+
chr1	92422666	92424540	1	+
chr1	92423088	92423470	1	+
chr1	94314526	94315177	2	+
chr1	94314526	94358464	1	+
chr1	94557867	94561324	2	+
chr1	95513002	95536688	2	-
chr1	95743459	95744239	1	-
chr1	95744065	95748901	1	-
chr1	95764253	95766334	1	+
chr1	95764253	95770215	1	+
chr1	95846714	95847499	1	+
chr1	96202876	96205587	1	-
chr1	96447976	96493470	1	-
chr1	96460911	96462807	1	-
chr1	96472569	96516009	1	-
chr1	97447507	97451864	1	-
chr1	97501557	97503030	1	-
chr1	98354266	98358280	1	+
chr1	98708818	98725770	1	-
chr1	98860450	98888929	2	-
chr1	98860450	98931423	1	-
chr1	98929604	98973843	1	-
chr1	99504017	99505136	1	-
chr1	99612927	99617351	1	-
chr1	99850707	99876774	1	-
chr1	99850707	99853573	1	-
chr1	99895471	99896370	1	-
chr1	100589849	100613174	21	+
chr1	100589849	100603238	3	+
chr1	100589849	100626714	3	+
chr1	100589849	100597672	1	+
chr1	100589849	100626668	5	+
chr1	100589849	100624993	2	+
chr1	100592210	100603238	1	+
chr1	100597459	100613174	1	+
chr1	103695962	103697703	1	-
chr1	103718638	103738168	1	-
chr1	103802718	103808752	1	+
chr1	104748095	104754395	1	-
chr1	104748095	104846273	1	-
chr1	104764628	104774676	1	-
chr1	105985061	106000228	1	-
chr1	106114309	106171073	1	+
chr1	106148089	106150609	4	+
chr1	106150520	106171073	1	+
chr1	106314172	106317699	1	+
chr1	106913170	106917338	1	-
chr1	106916177	106924847	1	-
chr1	106923368	106924847	3	-
chr1	106923368	106926988	1	-
chr1	107015988	107025677	1	+
chr1	107027772	107032015	1	+
chr1	107028043	107031624	2	+
chr1	107028043	107034324	1	+
chr1	107067243	107067626	1	+
chr1	107497947	107498151	1	-
chr1	107535161	107553238	1	-
chr1	107552364	107553238	1	-
chr1	107563969	107564196	1	-
chr1	107630021	107639089	1	-
chr1	107763495	107763896	1	+
chr1	108248955	108249911	1	+
chr1	108265523	108270797	1	+
chr1	108285314	108285727	1	+
chr1	108325204	108338491	2	+
chr1	108326425	108336262	1	+
chr1	108385211	108386218	2	+
chr1	108447645	108486823	1	-
chr1	108459470	108486823	1	-
chr1	108482615	108486823	2	-
chr1	108708982	108709227	1	+
chr1	108829481	108829696	2	-
chr1	108999548	109001779	1	-
chr1	109475380	109475967	1	-
chr1	109944955	109953251	4	+
chr1	109953149	109963105	1	+
chr1	109966723	109975692	1	+
chr1	109969042	109972743	1	+
chr1	109970585	109980151	1	+
chr1	109970585	109985441	1	+
chr1	109970585	109992482	1	+
chr1	109970585	110008262	1	+
chr1	109971463	109986716	1	+
chr1	109985346	110083720	1	+
chr1	110029112	110071394	1	+
chr1	110032827	110045902	1	+
chr1	110034205	110042154	1	+
chr1	110043813	110045873	1	+
chr1	110784265	110785090	1	+
chr1	111141468	111141683	1	+
chr1	111454976	111471392	1	+
chr1	111604491	111622652	1	+
chr1	111623720	111625904	1	+
chr1	112351894	112364958	1	+
chr1	112774112	112786111	1	+
chr1	112802692	112836551	1	+
chr1	112802692	112817568	2	+
chr1	112812139	112844232	1	+
chr1	112815693	112823650	2	+
chr1	112827598	112833528	1	+
chr1	112862367	112885058	1	+
chr1	112968879	112974578	1	-
chr1	112973292	113013582	1	-
chr1	112996634	113013582	1	-
chr1	113012686	113013582	1	-
chr1	113097706	113102025	1	+
chr1	113097706	113131324	1	+
chr1	113111065	113131324	1	+
chr1	113115995	113131324	1	+
chr1	113127999	113128579	1	+
chr1	113362646	113377340	1	+
chr1	114475781	114475997	1	-
chr1	114726980	114740195	2	-
chr1	114737785	114740195	1	-
chr1	114778918	114779365	1	-
chr1	115270672	115274463	1	+
chr1	115283258	115292893	1	+
chr1	115526931	115587291	1	-
chr1	115527676	115587291	1	-
chr1	115553444	115585772	1	-
chr1	115553444	115576329	1	-
chr1	115575634	115595480	1	-
chr1	115575634	115587291	1	-
chr1	115584888	115595480	2	-
chr1	115791743	115820705	1	+
chr1	115874658	115918439	3	+
chr1	115874658	115886591	1	+
chr1	116018815	116038761	3	+
chr1	119031883	119071512	1	+
chr1	119079825	119091715	1	+
chr1	119087041	119091715	1	+
chr1	119147937	119152992	2	+
chr1	119372723	119394650	1	+
chr1	119481809	119487008	1	+
chr1	119487613	119500634	2	+
chr1	119497905	119516561	1	+
chr1	119505795	119516561	1	+
chr1	119542573	119571057	1	+
chr1	119661521	119732348	1	-
chr1	119720670	119740313	1	-
chr1	119727109	119740313	1	-
chr1	119735150	119740313	1	-
chr1	119738114	119740313	1	-
chr1	119871909	119878715	1	-
chr1	119871909	119905302	1	-
chr1	119876496	119878715	1	-
chr1	119905145	119909321	1	-
chr1	120176021	120185745	2	+
chr1	120229991	120239100	1	+
chr1	120892999	120911093	1	-
chr1	120915564	120933928	1	-
chr1	121096267	121099128	1	+
chr1	121096267	121097348	1	+
chr1	121097165	121104566	1	+
chr1	121104414	121121454	1	+
chr1	121109035	121111876	1	+
chr1	121109050	121130648	1	+
chr1	121111177	121116999	1	+
chr1	121116154	121116999	1	+
chr1	121160752	121179866	1	+
chr1	121172070	121197117	1	+
chr1	121172070	121182126	1	+
chr1	121192912	121197117	1	+
chr1	121192912	121215234	1	+
chr1	121201526	121220450	1	+
chr1	121211635	121228255	1	+
chr1	121217325	121230821	12	+
chr1	121217325	121228255	2	+
chr1	121217325	121235683	1	+
chr1	121217325	121239905	1	+
chr1	121217325	121221648	2	+
chr1	121217325	121238262	2	+
chr1	121220382	121230821	1	+
chr1	121220382	121243452	1	+
chr1	121317191	121335034	1	-
chr1	121330341	121335034	2	-
chr1	121334813	121360838	1	-
chr1	121454890	121464032	1	+
chr1	121731740	121738042	1	+
chr1	121888699	121896972	1	+
chr1	122370288	122370496	1	-
chr1	122426083	122444476	1	-
chr1	122494127	122498068	2	-
chr1	122557547	122565937	1	+
chr1	122641983	122652467	1	+
chr1	122651160	122652467	1	+
chr1	122765928	122805490	1	+
chr1	122828852	122849434	1	+
chr1	122935777	122951814	1	+
chr1	122957821	122967374	1	+
chr1	123607337	123626697	1	+
chr1	126080089	126082755	1	-
chr1	126088915	126103029	1	-
chr1	126102975	126114467	1	-
chr1	126159089	126174995	2	-
chr1	126169041	126179811	1	-
chr1	126169041	126174995	1	-
chr1	126674491	126678967	1	-
chr1	126840051	126867733	1	-
chr1	126906616	126953734	2	+
chr1	126950633	126955106	1	+
chr1	127004145	127007054	1	-
chr1	127066889	127090833	1	-
chr1	127090623	127090833	1	-
chr1	127175567	127177694	2	-
chr1	127195768	127207695	1	-
chr1	127195768	127196307	1	-
chr1	127746551	127748026	1	+
chr1	127746551	127748761	2	+
chr1	127748573	127750235	1	+
chr1	127755310	127759333	1	-
chr1	127972860	127977436	1	+
chr1	127977230	127987394	1	+
chr1	128098555	128099400	2	-
chr1	128262759	128264137	1	-
chr1	128372163	128401555	1	+
chr1	128374260	128387930	1	+
chr1	128405779	128409218	1	+
chr1	128423904	128441443	1	+
chr1	128679847	128698284	2	-
chr1	128852872	128864219	1	-
chr1	128906805	128942374	1	+
chr1	129033573	129085684	1	-
chr1	129053474	129085684	1	-
chr1	129062736	129078630	6	-
chr1	129106541	129114618	1	+
chr1	129197615	129198545	1	+
chr1	129599706	129616551	2	-
chr1	129651196	129662208	2	-
chr1	129687075	129688206	3	-
chr1	130010432	130029610	2	-
chr1	130089893	130103599	1	-
chr1	130233522	130278467	1	+
chr1	130233522	130242062	1	+
chr1	130247719	130256849	1	+
chr1	130247719	130269883	1	+
chr1	130255151	130256849	3	+
chr1	130452309	130452851	1	+
chr1	131098975	131111716	1	-
chr1	131111610	131120613	1	-
chr1	131113575	131120613	1	-
chr1	131253245	131253584	1	-
chr1	131262571	131273283	1	-
chr1	131284455	131288341	1	-
chr1	131326819	131340853	1	-
chr1	131329002	131340853	1	-
chr1	132690583	132691152	1	-
chr1	132924803	132963031	1	-
chr1	136003626	136010863	1	+
chr1	136157111	136164328	2	+
chr1	136175601	136188157	5	+
chr1	136175601	136179661	1	+
chr1	136190465	136199337	1	+
chr1	136226170	136229651	1	+
chr1	137420452	137423176	1	-
chr1	137445436	137452742	1	-
chr1	137638040	137638586	2	-
chr1	138026871	138051339	1	+
chr1	138048249	138051339	1	+
chr1	138050567	138051339	1	+
chr1	138371348	138432806	1	+
chr1	138468427	138486301	1	+
chr1	138471132	138472413	3	+
chr1	138619628	138619828	1	+
chr1	139576527	139578175	1	+
chr1	139598053	139599600	1	+
chr1	141920483	141927044	6	+
chr1	141971368	141976711	1	+
chr1	143881203	143884532	1	+
chr1	143949376	143960599	2	-
chr1	143977483	143990559	2	-
chr1	144908399	144961926	2	-
chr1	144935195	144939137	1	-
chr1	144967551	144968613	1	-
chr1	144999898	145032143	1	-
chr1	145568781	145572777	1	+
chr1	145793905	145798752	2	-
chr1	145950261	145964893	1	-
chr1	146128966	146194348	1	-
chr1	146154355	146194348	1	-
chr1	146174105	146194348	1	-
chr1	146174105	146200405	2	-
chr1	146194239	146200405	1	-
chr1	146194239	146203720	1	-
chr1	147709458	147713792	1	-
chr1	147750271	147767245	1	-
chr1	147754638	147767245	1	-
chr1	147756046	147767245	1	-
chr1	147765751	147767245	2	-
chr1	149478220	149488620	1	-
chr1	149521233	149541172	1	-
chr1	149525671	149542825	2	-
chr1	152700473	152737450	1	+
chr1	152723998	152737450	3	+
chr1	152818792	152833780	1	+
chr1	152982073	152987392	1	+
chr1	158249936	158251386	1	+
chr1	158346857	158347094	2	+
chr1	158693804	158709994	1	-
chr1	158693804	158732238	1	-
chr1	158751248	158758254	1	-
chr1	158983389	158985622	1	-
chr1	158983389	159000991	1	-
chr1	158991492	159006320	1	-
chr1	159217322	159257189	2	-
chr1	159242074	159279434	1	-
chr1	159263152	159289794	1	-
chr1	159276019	159289794	2	-
chr1	159277861	159279434	1	-
chr1	159337628	159390156	2	+
chr1	159341716	159350894	1	+
chr1	159368256	159375875	2	+
chr1	159371731	159375875	1	+
chr1	159371731	159381432	2	+
chr1	159381329	159398246	1	+
chr1	159390069	159400875	1	+
chr1	161611161	161620810	1	+
chr1	161618411	161620810	1	+
chr1	161909789	161924707	6	-
chr1	161909789	161920459	1	-
chr1	161909789	161924704	1	-
chr1	161936898	161939261	3	-
chr1	162115330	162116033	1	-
chr1	163013885	163023943	1	+
chr1	163020390	163023943	1	+
chr1	163020390	163020678	1	+
chr1	163023322	163026409	1	+
chr1	163026218	163042228	1	+
chr1	163040325	163042228	1	+
chr1	163184040	163190007	1	-
chr1	163184040	163189984	1	-
chr1	163189294	163197984	1	-
chr1	163197824	163200297	1	-
chr1	163211216	163212239	1	-
chr1	163457569	163467256	1	-
chr1	163457569	163481032	1	-
chr1	163475930	163485045	1	-
chr1	163477440	163481032	1	-
chr1	163477440	163485045	3	-
chr1	163671351	163674120	1	-
chr1	163673700	163674120	1	-
chr1	163683279	163693283	1	-
chr1	163693166	163697214	1	-
chr1	163865639	163866262	1	+
chr1	163865639	163872243	1	+
chr1	164348761	164352028	1	+
chr1	164357617	164364138	2	-
chr1	164420444	164422619	3	+
chr1	164993111	164994670	1	+
chr1	165162979	165168640	2	-
chr1	165481773	165522457	2	+
chr1	165522392	165582736	1	+
chr1	165549894	165582736	2	+
chr1	165996062	166058413	1	+
chr1	165996062	166044981	2	+
chr1	165996062	165996507	1	+
chr1	166033283	166037819	2	+
chr1	166033283	166044981	2	+
chr1	166033283	166082320	1	+
chr1	166036952	166058413	22	+
chr1	166036952	166044981	5	+
chr1	166036952	166070635	1	+
chr1	166036952	166073595	1	+
chr1	166600608	166601501	1	+
chr1	166664344	166665414	1	-
chr1	168363330	168368178	1	-
chr1	168368125	168377139	1	-
chr1	169397266	169410448	1	-
chr1	169420291	169424282	1	-
chr1	169420291	169430733	1	-
chr1	169425073	169430733	1	-
chr1	169427078	169439848	2	-
chr1	169439748	169482865	1	-
chr1	169450581	169462566	1	-
chr1	169462443	169482865	2	-
chr1	169468879	169482865	3	-
chr1	169482789	169559446	1	-
chr1	169491975	169559446	2	-
chr1	169503332	169559446	1	-
chr1	169509962	169513314	1	-
chr1	169521967	169559446	1	-
chr1	169551754	169559446	2	-
chr1	169558535	169559446	1	-
chr1	169713655	169718710	2	-
chr1	169728314	169730927	1	+
chr1	169816374	169823277	1	+
chr1	169821468	169829760	1	+
chr1	169840580	169844114	1	+
chr1	169987271	169990453	1	+
chr1	170070317	170134677	1	+
chr1	175172537	175178727	1	-
chr1	175212417	175230407	1	+
chr1	175221563	175245842	2	+
chr1	175221563	175230407	1	+
chr1	175221563	175221857	1	+
chr1	175244213	175246746	1	+
chr1	175246592	175269814	1	+
chr1	175300726	175306182	1	+
chr1	175412140	175432656	2	-
chr1	175412140	175443338	1	-
chr1	175422948	175443338	3	-
chr1	175432582	175438963	1	-
chr1	175438487	175438963	1	-
chr1	179618865	179621087	1	+
chr1	179622900	179625496	2	-
chr1	179628010	179665826	1	-
chr1	179631515	179638570	1	-
chr1	179650257	179656225	1	-
chr1	179671962	179686554	3	-
chr1	179925603	179971143	1	-
chr1	179946275	179956922	1	-
chr1	179955074	179959267	1	-
chr1	179957821	179958477	1	-
chr1	179969602	179997417	1	-
chr1	180223967	180229368	2	-
chr1	180407634	180431593	3	-
chr1	180431149	180431593	1	-
chr1	180489461	180499197	1	-
chr1	180529104	180552016	1	-
chr1	181158084	181175566	1	+
chr1	181386970	181390515	3	+
chr1	182118904	182194969	2	-
chr1	182134579	182139525	1	-
chr1	182161652	182169099	3	-
chr1	182184847	182194969	1	-
chr1	182231885	182234106	1	+
chr1	182335258	182341782	1	+
chr1	182338670	182341782	2	+
chr1	182338670	182341116	1	+
chr1	182340846	182341116	1	+
chr1	182341720	182348499	2	+
chr1	182344155	182348499	2	+
chr1	182373762	182388778	1	+
chr1	182375386	182380474	1	+
chr1	182535316	182542799	1	-
chr1	182535316	182577496	1	-
chr1	182544813	182545513	1	-
chr1	182678726	182720865	3	-
chr1	182683008	182720865	1	-
chr1	182688833	182720865	1	-
chr1	182698436	182720865	1	-
chr1	182709190	182720865	1	-
chr1	183693397	183698111	1	-
chr1	183704933	183790325	1	-
chr1	184048956	184049475	5	+
chr1	184048956	184100878	1	+
chr1	184048956	184116952	2	+
chr1	184355148	184356505	2	-
chr1	184914187	184923633	1	+
chr1	184914187	184920865	2	+
chr1	184917907	184937075	1	+
chr1	184920694	184923633	1	+
chr1	184953789	184963408	1	+
chr1	185858078	185878194	1	+
chr1	186347290	186392924	1	-
chr1	186415389	186418273	1	-
chr1	186442611	186443769	1	+
chr1	187315687	187323793	1	+
chr1	187319035	187331435	1	+
chr1	187388813	187401467	1	+
chr1	187391639	187401467	1	+
chr1	187391639	187411824	1	+
chr1	187635948	187640180	2	+
chr1	189124503	189125884	1	+
chr1	189136728	189138606	2	+
chr1	189746193	189769062	2	+
chr1	189746193	189809078	1	+
chr1	189746193	189784854	2	+
chr1	189763514	189809078	1	+
chr1	190336386	190367567	1	+
chr1	190360675	190367567	1	+
chr1	190648252	190649258	1	+
chr1	190648252	190654424	1	+
chr1	190653540	190662010	1	+
chr1	191670417	191702307	1	+
chr1	193989472	194004255	1	-
chr1	194001519	194011399	1	-
chr1	194038569	194064182	1	-
chr1	194063963	194065411	1	-
chr1	194164797	194207376	1	-
chr1	194193590	194193823	1	-
chr1	194586329	194619966	2	+
chr1	195982744	196008940	1	-
chr1	196100532	196103400	1	-
chr1	196204347	196206049	1	+
chr1	196235463	196237559	1	+
chr1	200409327	200410245	1	-
chr1	201277515	201291610	1	+
chr1	201288552	201376639	1	+
chr1	201376850	201406726	1	+
chr1	201409086	201426491	1	+
chr1	201504911	201524277	2	+
chr1	201715674	201718049	2	-
chr1	201965064	202026822	1	-
chr1	201991307	202004608	1	-
chr1	202015754	202055132	1	-
chr1	202156542	202230553	2	-
chr1	202170880	202225299	1	-
chr1	202176835	202207406	1	-
chr1	202176835	202188317	1	-
chr1	202188215	202228210	1	-
chr1	202207301	202254632	1	-
chr1	202207301	202228210	1	-
chr1	202536296	202536998	1	+
chr1	203451210	203476159	2	-
chr1	203507696	203509434	1	-
chr1	203507915	203547745	1	-
chr1	203515104	203547745	1	-
chr1	203515104	203537078	1	-
chr1	203531905	203561227	3	-
chr1	203531905	203537078	5	-
chr1	203531905	203547745	1	-
chr1	203536416	203538914	1	-
chr1	203546397	203547745	1	-
chr1	203685645	203692596	2	+
chr1	203685645	203694104	2	+
chr1	203685645	203685979	1	+
chr1	203685978	203688334	1	+
chr1	203689745	203694104	2	+
chr1	203692461	203694457	1	+
chr1	203701825	203721363	1	+
chr1	204028923	204099075	1	-
chr1	207033346	207066744	1	-
chr1	207190792	207194651	1	+
chr1	207858353	207861882	1	+
chr1	208189591	208203474	1	+
chr1	208322287	208407707	2	+
chr1	208355017	208364542	1	+
chr1	208355017	208389714	1	+
chr1	208360881	208364542	1	+
chr1	208986996	208987753	1	+
chr1	209237228	209237521	1	+
chr1	209240700	209244141	2	+
chr1	209261052	209264499	1	+
chr1	209264310	209265789	1	+
chr1	209302742	209320317	1	+
chr1	209354802	209391853	2	+
chr1	209369407	209432764	2	+
chr1	215191227	215263876	2	-
chr1	215191227	215219681	1	-
chr1	215256333	215266887	1	-
chr1	215327429	215327655	2	-
chr1	215350449	215374998	1	-
chr1	215732367	215736396	1	-
chr1	215743546	215771774	1	-
chr1	215745864	215754716	1	-
chr1	215771555	215789381	1	-
chr1	216148994	216177064	3	+
chr1	216148994	216199042	1	+
chr1	216175646	216177064	1	+
chr1	216209671	216210109	1	+
chr1	216332767	216333648	2	+
chr1	216427781	216434127	1	-
chr1	216889403	216893008	1	-
chr1	216889403	216897938	1	-
chr1	216892030	216893008	1	-
chr1	216892821	216933620	1	-
chr1	216914274	216918840	1	-
chr1	216933496	216951002	1	-
chr1	217331109	217351085	1	+
chr1	217643587	217644074	1	+
chr1	217786692	217794582	2	+
chr1	217856450	217858426	2	+
chr1	217919515	217919866	1	+
chr1	218542444	218573173	1	+
chr1	218559748	218573173	1	+
chr1	218569067	218573173	1	+
chr1	219000458	219002085	1	+
chr1	219000458	219008904	2	+
chr1	219000458	219005882	1	+
chr1	219009382	219016372	1	+
chr1	219009382	219017536	1	+
chr1	219010540	219028462	3	+
chr1	219625601	219661659	1	-
chr1	219640994	219661659	1	-
chr1	219670702	219678104	2	-
chr1	219670788	219678190	1	-
chr1	219700609	219730732	2	-
chr1	219729928	219774774	2	-
chr1	219740204	219802079	1	-
chr1	221778749	221783005	1	+
chr1	222211741	222244262	1	+
chr1	222271827	222290918	2	+
chr1	222290762	222296761	1	+
chr1	222582658	222587312	5	+
chr1	222582658	222588477	1	+
chr1	222600526	222675004	1	+
chr1	222604810	222610648	1	+
chr1	223057448	223065782	1	-
chr1	223057448	223077506	1	-
chr1	223565044	223572485	1	+
chr1	223593899	223596456	1	+
chr1	223608484	223647693	1	+
chr1	223613436	223634626	1	+
chr1	223649233	223649589	1	+
chr1	223702579	223723842	1	-
chr1	223722951	223723842	2	-
chr1	223974591	223997188	1	-
chr1	225740186	225740469	1	+
chr1	225797244	225797927	1	+
chr1	227839457	227861071	1	-
chr1	227998337	228037829	1	-
chr1	227999396	228037829	1	-
chr1	228009508	228037829	1	-
chr1	228032342	228034973	1	-
chr1	228063645	228083143	1	-
chr1	228972124	228986161	1	+
chr1	228980933	228986161	2	+
chr1	229603969	229612467	1	-
chr1	230091379	230101283	1	+
chr1	230100569	230101283	2	+
chr1	230111823	230119332	1	+
chr1	230250824	230280276	1	+
chr1	230250824	230289458	1	+
chr1	230250824	230304218	1	+
chr1	230266503	230273337	2	+
chr1	230322184	230329978	1	+
chr1	230322184	230332196	1	+
chr1	235599629	235600640	1	-
chr1	235969398	235983215	1	+
chr1	235970786	235977603	1	+
chr1	235976284	235983215	1	+
chr1	236043217	236061313	2	+
chr1	236135798	236151861	1	+
chr1	236469950	236471042	1	+
chr1	237126955	237127531	1	-
chr1	237142950	237157384	1	-
chr1	237179410	237205224	1	-
chr1	238015228	238018002	1	+
chr1	238237634	238241403	2	-
chr1	238247723	238251089	1	-
chr1	238326487	238328885	1	-
chr1	238519258	238520959	2	+
chr1	238594022	238609475	1	+
chr1	238620342	238622572	2	+
chr1	239542030	239564082	1	-
chr1	239545485	239564082	1	-
chr1	239548009	239564082	1	-
chr1	239800373	239832709	1	-
chr1	239891231	239905198	1	+
chr1	240721729	240723185	2	+
chr1	240889405	240900266	1	+
chr1	240980348	240981245	1	-
chr1	241809452	241824281	1	-
chr1	241850244	241856444	1	-
chr1	241979931	241998014	1	+
chr1	241979931	242018942	1	+
chr1	241979931	241993256	1	+
chr1	242018655	242018942	1	+
chr1	242064594	242116331	1	-
chr1	242111790	242116331	2	-
chr1	242111790	242113126	1	-
chr1	242675852	242753732	1	+
chr1	242744565	242755651	1	+
chr1	242815931	242822693	1	+
chr1	242920826	242934963	1	+
chr1	242959990	242963981	1	+
chr1	243353402	243371089	1	-
chr1	243353402	243354450	1	-
chr1	245785137	245816542	1	-
chr1	245795370	245808885	1	-
chr1	246122365	246170293	2	-
chr1	246218296	246239704	1	-
chr1	246218296	246243861	1	-
chr1	246238088	246243861	1	-
chr1	246238088	246257483	1	-
chr1	246608502	246626910	1	+
chr1	246620911	246627215	1	+
chr1	246866710	246874253	1	+
chr1	248463644	248474020	1	+
chr1	248463644	248483274	1	+
chr1	248467611	248474020	1	+
chr1	248467611	248468871	1	+
chr1	249962771	249971713	1	+
chr1	250036614	250044396	1	-
chr1	250097103	250139692	1	-
chr1	250119553	250119951	2	-
chr1	250307335	250313108	1	-
chr1	250462713	250488387	2	-
chr1	250966942	250967638	1	+
chr1	251479230	251482425	1	-
chr1	252235840	252269176	1	-
chr1	252271581	252280307	2	-
chr1	252271581	252289498	3	-
chr1	252431130	252435454	1	+
chr1	252859230	252885142	1	-
chr1	252995230	253000302	1	-
chr1	253012173	253014268	2	-
chr1	253012173	253056412	1	-
chr1	253012173	253038696	1	-
chr1	253034154	253056412	4	-
chr1	253034154	253038696	1	-
chr1	253179679	253190897	1	+
chr1	253198396	253199433	1	-
chr1	253819152	253822106	1	-
chr1	253833226	253845805	1	-
chr1	253845655	253853400	1	-
chr1	253847981	253853400	2	-
chr1	253852813	253857053	1	-
chr1	254954830	254964432	1	-
chr1	260549829	260564338	1	-
chr1	260614548	260634517	1	-
chr1	261142020	261155614	1	+
chr1	261142020	261169752	1	+
chr1	261200282	261208841	1	+
chr1	261237315	261246048	2	-
chr1	261242622	261246048	3	-
chr1	261388209	261394508	1	-
chr1	262470851	262471098	1	+
chr1	263804086	263814895	1	-
chr1	263873073	263916275	2	+
chr1	263873073	263940366	2	+
chr1	263873073	263932949	1	+
chr1	263873212	263940366	1	+
chr1	263873212	263916275	1	+
chr1	263902376	263940366	1	+
chr1	263913947	263940366	1	+
chr1	263932774	263940366	1	+
chr1	263985597	264010385	1	+
chr1	264009751	264020783	2	+
chr1	264019072	264020783	1	+
chr1	264046192	264095313	1	-
chr1	265663997	265671376	1	-
chr1	265671280	265678888	2	-
chr1	265729317	265751600	1	-
chr1	265855153	265859531	1	-
chr1	265920719	265924230	1	+
chr1	265970487	266012284	1	+
chr1	266189646	266230012	1	-
chr1	266296453	266312704	6	-
chr1	266296453	266321713	1	-
chr1	266309589	266312704	1	-
chr1	266947328	266999838	1	+
chr1	266981814	266999838	3	+
chr1	266981814	267028781	1	+
chr1	266986660	266999838	1	+
chr1	266986662	266999838	1	+
chr1	267525105	267545008	1	+
chr1	268022701	268031046	1	-
chr1	268071274	268164853	1	+
chr1	268252251	268252527	2	-
chr1	268954519	268994916	1	+
chr1	268956427	268957076	1	+
chr1	268977337	268978809	1	+
chr1	269145151	269146298	1	+
chr1	269267685	269268033	1	+
chr1	269582406	269583665	1	+
chr1	269908152	269969046	1	+
chr1	270096256	270114018	1	-
chr1	270205473	270211454	1	+
chr1	270874728	270897897	1	+
chr1	270897824	270906296	1	+
chr1	270899687	270900268	2	+
chr1	271108190	271109313	1	+
chr1	271129114	271134394	1	+
chr1	271135356	271135760	1	+
chr1	271146966	271175411	1	+
chr1	271146966	271147908	1	+
chr1	271160877	271175411	1	+
chr1	271368899	271377311	1	+
chr1	271368899	271384260	1	+
chr1	271368903	271384260	1	+
chr1	271380947	271384260	1	+
chr1	271551339	271561877	1	-
chr1	272095475	272096494	1	-
chr1	272101948	272138444	1	-
chr1	272106050	272127308	1	-
chr1	272124347	272138396	1	-
chr1	272138344	272158191	1	-
chr1	272157971	272162713	1	-
chr1	272399434	272411645	1	-
chr1	272579688	272584378	1	-
chr1	272666232	272670206	1	-
chr1	273036571	273046921	1	+
chr1	273342080	273347767	1	-
chr1	273343549	273347767	2	-
chr10	587693	598867	3	-
chr10	649311	656984	1	-
chr10	701750	713164	1	-
chr10	701750	716402	1	-
chr10	701825	705049	1	-
chr10	711621	713164	1	-
chr10	734756	748642	1	+
chr10	734756	761696	1	+
chr10	5759750	5772004	1	+
chr10	5777658	5806269	1	+
chr10	7667573	7689038	2	-
chr10	7777118	7780971	1	-
chr10	8265576	8271193	3	+
chr10	8265585	8271193	1	+
chr10	8382469	8384507	1	+
chr10	8382469	8386109	1	+
chr10	8950585	8978128	1	+
chr10	9702152	9713083	1	+
chr10	9739374	9739872	1	-
chr10	9772843	9780346	1	-
chr10	10038503	10066131	1	+
chr10	11446255	11451376	2	-
chr10	11603221	11654794	2	+
chr10	11654268	11699441	1	+
chr10	11654268	11654794	2	+
chr10	11693302	11694808	1	+
chr10	11766359	11768567	1	-
chr10	11795497	11813711	1	-
chr10	11818650	11823816	1	-
chr10	12018557	12046826	1	-
chr10	12018557	12055451	1	-
chr10	12486372	12488249	2	+
chr10	12547678	12551049	1	+
chr10	12564138	12564881	1	+
chr10	12595561	12602812	1	-
chr10	12595561	12607851	1	-
chr10	12595561	12652349	2	-
chr10	12654333	12667110	1	-
chr10	12725882	12738171	2	-
chr10	12731589	12753718	1	-
chr10	12774670	12844288	1	+
chr10	12859569	12860109	1	+
chr10	13410178	13411123	1	-
chr10	13491754	13527498	1	-
chr10	13516187	13527498	1	-
chr10	13715304	13717225	2	+
chr10	13780265	13788201	1	-
chr10	13782210	13788201	1	-
chr10	13791023	13791372	1	-
chr10	13883649	13887436	1	-
chr10	13977636	13981115	3	+
chr10	13978830	13982046	1	+
chr10	14036556	14037947	1	-
chr10	14134453	14232231	1	-
chr10	14136880	14175682	1	-
chr10	14171011	14175682	2	-
chr10	14390076	14474024	1	+
chr10	14624307	14624684	1	+
chr10	14657920	14667955	1	-
chr10	14666447	14696945	1	-
chr10	14679213	14681291	1	-
chr10	14719457	14755010	1	-
chr10	14719457	14754512	1	-
chr10	14719457	14727556	1	-
chr10	14786193	14794270	3	-
chr10	14806110	14832728	1	-
chr10	14807078	14859342	3	-
chr10	14826466	14884976	1	-
chr10	15051105	15063364	1	+
chr10	15051154	15053287	1	+
chr10	15079658	15095653	1	+
chr10	15081442	15083722	1	+
chr10	15175029	15179109	1	+
chr10	15236725	15262500	1	-
chr10	16222140	16240858	1	+
chr10	16345991	16359066	2	+
chr10	16490535	16522506	1	-
chr10	16541737	16607933	1	-
chr10	16560320	16569899	1	-
chr10	16560320	16607933	2	-
chr10	16569754	16607933	1	-
chr10	16585539	16607933	1	-
chr10	17244141	17247667	1	-
chr10	17467675	17468635	1	-
chr10	17478591	17481300	4	-
chr10	17490159	17493096	1	-
chr10	18954686	18955091	1	-
chr10	19074730	19075159	1	+
chr10	19252953	19311348	1	+
chr10	19806729	19812293	1	+
chr10	19806729	19813461	2	+
chr10	19853238	19853462	1	-
chr10	19949147	19952852	1	+
chr10	20023981	20025769	1	-
chr10	20060943	20073030	1	-
chr10	20065004	20078273	1	-
chr10	20065004	20073030	1	-
chr10	20423358	20492142	1	-
chr10	20423358	20492105	1	-
chr10	20428974	20492105	1	-
chr10	20438110	20492148	1	-
chr10	20438110	20481282	2	-
chr10	20438110	20492105	1	-
chr10	20438110	20487072	1	-
chr10	20455783	20492105	1	-
chr10	20455783	20492142	1	-
chr10	20455783	20487072	1	-
chr10	20469602	20492105	6	-
chr10	20469602	20492148	1	-
chr10	20508014	20536074	1	-
chr10	21687448	21692170	1	-
chr10	21739637	21740523	1	-
chr10	23206548	23215158	1	-
chr10	23289743	23290003	1	+
chr10	23326335	23327196	1	+
chr10	24014298	24018647	1	+
chr10	24129788	24133305	1	+
chr10	24520950	24535656	1	+
chr10	24535473	24575688	2	+
chr10	24758315	24781769	1	-
chr10	24760508	24779098	1	-
chr10	24768865	24784588	2	-
chr10	24770315	24779098	2	-
chr10	24776755	24781769	1	-
chr10	24776755	24799565	2	-
chr10	24788310	24799565	1	-
chr10	24795545	24799565	1	-
chr10	24910300	24911744	1	-
chr10	25205439	25206443	4	+
chr10	25606344	25629631	1	-
chr10	25750795	25789158	1	+
chr10	25750795	25760758	1	+
chr10	25754104	25787532	1	+
chr10	25760690	25779015	1	+
chr10	25774891	25781347	1	+
chr10	26180873	26195694	1	-
chr10	26180873	26212860	1	-
chr10	26884789	26899843	1	+
chr10	27082081	27103419	1	-
chr10	27106253	27106571	1	-
chr10	27270615	27271843	1	-
chr10	27423635	27424548	1	-
chr10	27788582	27794177	1	-
chr10	28959525	28972080	1	-
chr10	29004272	29005781	1	+
chr10	29004272	29045857	1	+
chr10	29004980	29035802	1	+
chr10	29028958	29035802	1	+
chr10	29033186	29035802	1	+
chr10	29037749	29038934	3	+
chr10	29037749	29039234	1	+
chr10	29038038	29043880	1	+
chr10	29175299	29177155	2	+
chr10	29228247	29230143	1	-
chr10	29492323	29509607	2	+
chr10	29509429	29529203	1	+
chr10	29528487	29535329	1	+
chr10	29533497	29553045	1	+
chr10	29552957	29573233	1	+
chr10	29563933	29573233	1	+
chr10	30329692	30428640	1	-
chr10	30329692	30362299	1	-
chr10	30329692	30342938	1	-
chr10	30379836	30389167	3	-
chr10	30559501	30564863	1	-
chr10	30584322	30634976	1	-
chr10	31044472	31048203	1	+
chr10	31153773	31175932	1	+
chr10	31295416	31297552	1	+
chr10	31295416	31303258	1	+
chr10	31963250	31969504	1	+
chr10	31963250	31983374	1	+
chr10	31964987	31981183	1	+
chr10	31969408	31983374	2	+
chr10	31976514	31983374	1	+
chr10	32569927	32576571	1	-
chr10	32570642	32576557	1	-
chr10	32754755	32755546	1	-
chr10	32800583	32819154	2	+
chr10	32800583	32827084	1	+
chr10	32817420	32827084	1	+
chr10	32817448	32827084	1	+
chr10	32840621	32855343	1	+
chr10	32850883	32859397	2	+
chr10	32855275	32862936	2	+
chr10	32855275	32878539	1	+
chr10	32859213	32870103	1	+
chr10	32859213	32866152	1	+
chr10	32912150	32933076	1	-
chr10	33000602	33001399	1	-
chr10	33072025	33073788	1	-
chr10	33141972	33143114	1	-
chr10	33229550	33237248	2	+
chr10	33229550	33238811	2	+
chr10	33231154	33237248	1	+
chr10	33319452	33319966	1	+
chr10	33404036	33423785	2	+
chr10	33434992	33442076	1	-
chr10	33442076	33443893	1	-
chr10	33891305	33943833	3	+
chr10	33915662	33917306	1	+
chr10	33920064	33923221	1	+
chr10	33948300	33961690	1	-
chr10	33956556	33957522	1	-
chr10	35916933	35940213	2	+
chr10	35923864	35954985	1	+
chr10	38975719	38996355	1	+
chr10	38991732	38997996	1	+
chr10	39096685	39099505	1	-
chr10	39392100	39446755	1	-
chr10	39995700	40011985	1	+
chr10	40015292	40018911	2	+
chr10	40771582	40772503	1	+
chr10	40771582	40790913	1	+
chr10	40782237	40790913	1	+
chr10	40782237	40799589	2	+
chr10	41202410	41257277	1	+
chr10	41229016	41257277	1	+
chr10	41311023	41311448	1	+
chr10	41430333	41431903	1	+
chr10	41434068	41434472	1	+
chr10	41445189	41461626	1	+
chr10	41723316	41725155	1	-
chr10	41916203	41943309	1	-
chr10	42061872	42079536	2	+
chr10	42061872	42147610	2	+
chr10	42063515	42147610	1	+
chr10	42063515	42079536	5	+
chr10	42063615	42079536	1	+
chr10	42147409	42147610	1	+
chr10	42192451	42194913	1	+
chr10	42402349	42472925	1	-
chr10	42432633	42464035	1	-
chr10	42464387	42490463	1	-
chr10	42468076	42490463	2	-
chr10	42468076	42479927	1	-
chr10	42490401	42509443	1	-
chr10	42497972	42510787	1	-
chr10	42501578	42510787	1	-
chr10	42552537	42555555	1	-
chr10	42646860	42647382	2	-
chr10	42659570	42683667	1	-
chr10	42670778	42672427	1	-
chr10	42851082	42855553	1	-
chr10	42852935	42855553	1	-
chr10	43329008	43329780	1	-
chr10	43443983	43446589	1	-
chr10	43448480	43453197	1	-
chr10	43522469	43526065	3	+
chr10	43903312	43918659	1	-
chr10	43967032	44007728	1	+
chr10	44928913	44935556	1	-
chr10	44928913	44947188	1	-
chr10	44934035	44935556	1	-
chr10	45107551	45190418	1	+
chr10	45130707	45142435	1	+
chr10	45145381	45190418	1	+
chr10	45992308	46006364	1	+
chr10	45992308	46022353	1	+
chr10	45992308	46032747	1	+
chr10	45992308	46027671	2	+
chr10	46002428	46006364	1	+
chr10	46538291	46548424	1	+
chr10	46706437	46717523	1	+
chr10	46845175	46853630	2	+
chr10	46926925	46927145	1	-
chr10	48039239	48043296	1	-
chr10	48088635	48092353	1	-
chr10	48101947	48110019	1	-
chr10	48164053	48164543	1	-
chr10	48206020	48213577	1	+
chr10	48507282	48513542	1	-
chr10	48532137	48562529	1	-
chr10	48538969	48562529	1	-
chr10	48547631	48553657	1	-
chr10	48547631	48562529	1	-
chr10	48713612	48747553	1	-
chr10	48814822	48820979	1	-
chr10	48814822	48824559	1	-
chr10	48816879	48822272	1	-
chr10	48831897	48849331	1	-
chr10	48904199	48911562	1	-
chr10	48909407	48909682	1	-
chr10	48911447	48916899	1	-
chr10	48993795	49061926	3	+
chr10	49096491	49116435	1	-
chr10	49170971	49178464	1	-
chr10	50624807	50640498	1	+
chr10	50648676	50649078	1	+
chr10	50664739	50665011	1	+
chr10	50700521	50704111	1	-
chr10	50709413	50757421	3	-
chr10	50716561	50757421	1	-
chr10	50739782	50757421	2	-
chr10	50751195	50757421	2	-
chr10	50814868	50865438	1	-
chr10	51510939	51586572	1	-
chr10	51510939	51554767	1	-
chr10	52929649	52963179	1	+
chr10	52937808	52963179	1	+
chr10	53000913	53001135	1	+
chr10	53089611	53137168	1	-
chr10	53089611	53104147	1	-
chr10	53103968	53169782	1	-
chr10	53144968	53149101	1	-
chr10	53158219	53202893	1	-
chr10	53169686	53202893	3	-
chr10	53169686	53245866	1	-
chr10	53169686	53214381	2	-
chr10	53197802	53202893	2	-
chr10	53766903	53785809	1	+
chr10	53785701	53858471	1	+
chr10	53785701	53795981	4	+
chr10	53795828	53858471	3	+
chr10	53795828	53888015	2	+
chr10	53795828	53870674	1	+
chr10	53795828	53841038	1	+
chr10	53795828	53833727	1	+
chr10	53870572	53879785	1	+
chr10	53950312	53952723	1	+
chr10	53973941	53974152	1	+
chr10	54359386	54390867	1	-
chr10	54467794	54504293	3	-
chr10	54493111	54504293	1	-
chr10	55840070	55884740	1	+
chr10	55865473	55918241	1	+
chr10	56027732	56038187	1	+
chr10	56092045	56094408	1	-
chr10	56099878	56100101	2	-
chr10	56437591	56440959	1	+
chr10	56466523	56478719	1	+
chr10	57126905	57137646	2	-
chr10	57126905	57212680	1	-
chr10	57126905	57168112	2	-
chr10	57137535	57194267	1	-
chr10	57167880	57236044	1	-
chr10	57167880	57212680	1	-
chr10	57184078	57194267	2	-
chr10	57227398	57252743	1	-
chr10	57227398	57236044	1	-
chr10	57250367	57252743	1	-
chr10	57250367	57297790	1	-
chr10	57250367	57317736	1	-
chr10	57691966	57694694	1	+
chr10	57714721	57721859	1	-
chr10	57719626	57721859	3	-
chr10	57752326	57768401	2	-
chr10	59745681	59752288	2	-
chr10	59810367	59814815	1	-
chr10	59836747	59853584	1	-
chr10	59845865	59853584	1	-
chr10	59913524	59919743	5	+
chr10	59913524	59926809	2	+
chr10	59913524	59957548	1	+
chr10	59913524	59974190	1	+
chr10	59913544	59919743	1	+
chr10	59913600	59919743	1	+
chr10	59957364	59985371	1	+
chr10	60258612	60355127	1	+
chr10	60355046	60380071	2	+
chr10	60368406	60376785	1	+
chr10	63606965	63608804	1	+
chr10	63619893	63626141	1	+
chr10	65174466	65191886	1	+
chr10	65179074	65191886	1	+
chr10	65187799	65188643	2	+
chr10	65195800	65196246	1	+
chr10	65201942	65203703	1	-
chr10	65234888	65238541	1	-
chr10	65244718	65247076	1	-
chr10	65246552	65247076	1	-
chr10	65570667	65592629	1	+
chr10	68491182	68518239	2	-
chr10	68491182	68499831	1	-
chr10	68491182	68509844	1	-
chr10	68509411	68518239	1	-
chr10	68512777	68518239	1	-
chr10	68528993	68555754	3	-
chr10	68562243	68562567	1	-
chr10	68610592	68610954	1	-
chr10	68645779	68684692	1	+
chr10	68645779	68692165	1	+
chr10	68671264	68688441	3	+
chr10	68684613	68688441	4	+
chr10	68684613	68698663	2	+
chr10	68959423	68970531	1	+
chr10	69175005	69235186	1	-
chr10	69201375	69235186	7	-
chr10	69212793	69235186	1	-
chr10	69233681	69235186	2	-
chr11	274221	371157	1	+
chr11	376041	380465	3	+
chr11	376041	381363	1	+
chr11	376041	389681	1	+
chr11	381225	413039	1	+
chr11	477964	483833	1	-
chr11	509494	555980	1	-
chr11	526302	604571	1	-
chr11	528110	528759	1	-
chr11	534134	562934	2	-
chr11	543479	562934	1	-
chr11	552301	562934	4	-
chr11	555884	562934	2	-
chr11	590173	590432	1	-
chr11	603752	604571	1	-
chr11	637975	697653	1	+
chr11	675653	686516	1	+
chr11	675688	683082	2	+
chr11	675688	676545	1	+
chr11	675688	686516	1	+
chr11	675688	720256	1	+
chr11	675688	726395	1	+
chr11	713799	714610	1	+
chr11	713799	718039	1	+
chr11	716130	718039	1	+
chr11	961506	978088	1	+
chr11	961506	983324	1	+
chr11	1004166	1009902	1	+
chr11	1118996	1141776	1	-
chr11	1125629	1128292	1	-
chr11	1141223	1141776	13	-
chr11	1141223	1163643	1	-
chr11	1141223	1175446	1	-
chr11	1341588	1357682	1	-
chr11	1341588	1371291	1	-
chr11	1355227	1376231	1	-
chr11	1355227	1371291	1	-
chr11	1357612	1376231	1	-
chr11	1364577	1371291	1	-
chr11	1387307	1457783	1	-
chr11	1429035	1463356	1	-
chr11	1455411	1463356	1	-
chr11	2737290	2741033	1	-
chr11	2848787	2851028	1	-
chr11	2875926	2881848	1	-
chr11	2983479	2985867	1	-
chr11	3104055	3158287	1	-
chr11	3119663	3119873	1	-
chr11	3193838	3208876	2	-
chr11	3208398	3208876	2	-
chr11	3953584	3981501	1	-
chr11	4104217	4118265	1	+
chr11	4104217	4143040	1	+
chr11	4114332	4118265	2	+
chr11	4299482	4323025	1	+
chr11	4338230	4345913	1	+
chr11	4615096	4630378	3	-
chr11	4620687	4630378	1	-
chr11	4627964	4630378	1	-
chr11	4627964	4640024	1	-
chr11	4627964	4652306	1	-
chr11	4639810	4652306	1	-
chr11	5503064	5507316	39	+
chr11	5503064	5546751	2	+
chr11	5503064	5524214	2	+
chr11	5503064	5588249	1	+
chr11	5507245	5588249	1	+
chr11	5524052	5588249	1	+
chr11	5524052	5608636	1	+
chr11	5524052	5581004	1	+
chr11	5546603	5581004	1	+
chr11	5565922	5581004	2	+
chr11	5577246	5602241	4	+
chr11	5577246	5581004	1	+
chr11	5577246	5588249	1	+
chr11	5580046	5588249	1	+
chr11	5587550	5602241	1	+
chr11	5587550	5608636	1	+
chr11	5587550	5593953	1	+
chr11	5587553	5602241	3	+
chr11	5766387	5767129	2	-
chr11	6571141	6571581	2	-
chr11	7025144	7045055	1	-
chr11	7842818	7855987	2	+
chr11	8660881	8662015	1	+
chr11	8843975	8866798	1	-
chr11	8939630	8941243	1	-
chr11	8940036	8941243	1	-
chr11	8974450	8982801	1	-
chr11	9084377	9169311	1	+
chr11	9092526	9094098	1	+
chr11	9132179	9170916	1	+
chr11	9139360	9149581	1	+
chr11	9139360	9170916	1	+
chr11	9145563	9170916	1	+
chr11	9145563	9149581	1	+
chr11	9524702	9544280	1	-
chr11	9654752	9658754	1	-
chr11	9731601	9734477	1	-
chr11	9814622	9895238	3	-
chr11	9823182	9895238	1	-
chr11	9894097	9895238	3	-
chr11	10984950	11001848	3	-
chr11	11156484	11209651	1	+
chr11	11156484	11181394	2	+
chr11	11160921	11181394	1	+
chr11	11171524	11231227	2	+
chr11	11208708	11255274	2	+
chr11	11228749	11314426	1	+
chr11	11248376	11266949	1	+
chr11	11280593	11300260	2	+
chr11	11357829	11359695	1	+
chr11	12349519	12353257	1	-
chr11	12791976	12812951	1	-
chr11	12843296	12862293	2	-
chr11	12846224	12862293	1	-
chr11	12851052	12862293	1	-
chr11	12858352	12862293	1	-
chr11	13775003	13776697	1	+
chr11	14153199	14154858	1	-
chr11	14592747	14629935	1	+
chr11	14592747	14611784	1	+
chr11	14986742	14987769	1	-
chr11	14987600	15038603	1	-
chr11	15709102	15712263	1	-
chr11	15719259	15724518	1	-
chr11	15917061	15919126	1	+
chr11	16094633	16116109	1	-
chr11	17761433	17781703	1	+
chr11	18168816	18176751	1	+
chr11	18256531	18260990	1	-
chr11	18265350	18290494	2	-
chr11	18265350	18269376	1	-
chr11	18266507	18269376	3	-
chr11	18350468	18379057	1	+
chr11	18571767	18580946	1	-
chr11	18577193	18584951	1	-
chr11	18607624	18613216	1	-
chr11	18665034	18676758	1	-
chr11	18714361	18715144	1	-
chr11	19129662	19134837	1	+
chr11	19129678	19134837	4	+
chr11	19129678	19151418	2	+
chr11	19200034	19274010	1	-
chr11	19200034	19204789	2	-
chr11	19250141	19270035	1	-
chr11	19250141	19281642	1	-
chr11	19256520	19274010	3	-
chr11	19260009	19274010	1	-
chr11	19315092	19321227	1	-
chr11	19349680	19356078	1	-
chr11	19352011	19356078	1	-
chr11	19623258	19630304	1	+
chr11	19629536	19630304	2	+
chr11	20221573	20223025	1	-
chr11	20656878	20664489	1	+
chr11	20710448	20719541	2	-
chr11	20710448	20781910	2	-
chr11	20713781	20719541	1	-
chr11	20736974	20742474	1	-
chr11	20767275	20804630	1	-
chr11	20834896	20835810	1	-
chr11	21020401	21022536	1	+
chr11	21090169	21137484	4	+
chr11	21090546	21158450	2	+
chr11	21187072	21192626	2	+
chr11	21351564	21360350	2	+
chr11	21772636	21813745	1	-
chr11	21786477	21789563	1	-
chr11	21786477	21813745	1	-
chr11	21786477	21793730	1	-
chr11	21789454	21805764	1	-
chr11	21789454	21813745	1	-
chr11	21791603	21805764	3	-
chr11	21795636	21805764	1	-
chr11	21797313	21805764	1	-
chr11	21804833	21813745	1	-
chr11	21804833	21808388	1	-
chr11	21855167	21856686	1	-
chr11	22004761	22017219	1	-
chr11	22116587	22128793	2	-
chr11	22255421	22259960	1	-
chr11	22284602	22288235	1	+
chr11	23750724	23784500	3	+
chr11	24113101	24113354	1	-
chr11	24138265	24146998	1	+
chr11	24140853	24176014	1	+
chr11	24140853	24146998	1	+
chr11	24140853	24211839	1	+
chr11	24729024	24739289	1	-
chr11	24785624	24838344	2	-
chr11	24826727	24830904	1	-
chr11	24857302	24858237	1	-
chr11	25147792	25152133	1	+
chr11	25318968	25343890	1	+
chr11	25318968	25370323	1	+
chr11	25563086	25589582	2	-
chr11	25563086	25587428	1	-
chr11	25735383	25761445	1	-
chr11	25749778	25761445	1	-
chr11	25755741	25761445	3	-
chr11	25758592	25761445	1	-
chr11	25822291	25867601	1	+
chr11	25822360	25840310	1	+
chr11	25838072	25863874	1	+
chr11	25838072	25838397	1	+
chr11	25849910	25850133	2	+
chr11	25876394	25887885	1	+
chr11	25923053	25937124	1	+
chr11	30548836	30549202	1	+
chr11	33313985	33336182	1	+
chr11	33391960	33392814	2	+
chr11	33391960	33402818	1	+
chr11	43876950	43893930	1	-
chr11	43952889	44004314	3	-
chr11	45026334	45038553	1	+
chr11	45032949	45038553	2	+
chr11	45034286	45035369	1	+
chr11	45138689	45163333	1	+
chr11	47549071	47595799	1	-
chr11	47603603	47628837	1	-
chr11	47816871	47817220	1	-
chr11	47849407	47884140	2	+
chr11	49141096	49145731	1	-
chr11	49194560	49216889	1	-
chr11	49203467	49210487	2	-
chr11	49242750	49289022	1	-
chr11	49260972	49289022	1	-
chr11	49260972	49265919	1	-
chr11	49262111	49263275	1	-
chr11	49305321	49371413	1	-
chr11	49514751	49523802	2	-
chr11	50762094	50773425	2	-
chr11	50762123	50773425	2	-
chr11	50762619	50773425	4	-
chr11	50762619	50776341	1	-
chr11	51362513	51374551	1	-
chr11	51373157	51394378	1	-
chr11	51374419	51394378	1	-
chr11	51531488	51534900	2	+
chr11	51531488	51540684	2	+
chr11	51531488	51547197	1	+
chr11	51531488	51554792	2	+
chr11	51531488	51551593	1	+
chr11	63621509	63625321	1	-
chr11	63698849	63701716	1	-
chr11	63699829	63706143	1	-
chr11	63701550	63711144	1	-
chr11	65256157	65268718	2	+
chr11	65281606	65283803	1	+
chr11	65301356	65302099	1	+
chr11	66516296	66536519	1	+
chr11	66597793	66605238	1	+
chr11	67200729	67217022	1	+
chr11	67200729	67227374	1	+
chr11	67200729	67227412	1	+
chr11	67393623	67437984	1	+
chr11	67409532	67411878	2	+
chr11	67477010	67524738	1	-
chr11	67767429	67782441	1	-
chr11	67819941	67852544	2	-
chr11	67876072	67898460	1	-
chr11	67895180	67904523	1	-
chr11	68173039	68181097	1	+
chr11	68448829	68449856	1	+
chr11	69725986	69732045	1	-
chr11	69776124	69794145	1	-
chr11	69776124	69837179	1	-
chr11	69792526	69794145	5	-
chr11	69792526	69837179	1	-
chr11	69998309	70001752	1	-
chr11	71125628	71135931	1	+
chr11	71147530	71161675	1	+
chr11	71158812	71161675	1	+
chr11	71158812	71165569	1	+
chr11	74209708	74209992	1	-
chr11	76862196	76864415	1	-
chr11	77134923	77138198	1	+
chr11	77291336	77312491	1	-
chr11	77484688	77489240	1	+
chr11	77489151	77510259	1	+
chr11	78343009	78351465	2	+
chr11	78343009	78352808	1	+
chr11	78349881	78352808	1	+
chr11	78349881	78356609	1	+
chr11	78351384	78356609	1	+
chr11	78356480	78385988	4	+
chr11	78382355	78383968	8	+
chr11	78543048	78543369	3	-
chr11	78693304	78703726	1	-
chr11	78756444	78765451	1	+
chr11	78762106	78773224	2	+
chr11	78765344	78773224	1	+
chr12	347485	370340	1	-
chr12	352468	354995	1	-
chr12	413916	435701	5	-
chr12	439694	448099	1	-
chr12	545650	604969	2	-
chr12	573170	585916	6	-
chr12	573170	575827	1	-
chr12	580547	585916	5	-
chr12	582646	585916	1	-
chr12	885441	886028	1	+
chr12	931163	935644	1	+
chr12	1130825	1131236	2	+
chr12	1255355	1259750	1	+
chr12	1263900	1268147	1	+
chr12	1492106	1494267	2	+
chr12	1492110	1494267	1	+
chr12	1746368	1752772	1	-
chr12	1804300	1853441	2	-
chr12	1838274	1922863	1	-
chr12	1838274	1923073	1	-
chr12	1838274	1853441	1	-
chr12	1910375	1923073	1	-
chr12	2126853	2127580	2	-
chr12	2169792	2174205	1	-
chr12	2200403	2204127	2	-
chr12	2308468	2311186	1	+
chr12	3287323	3356385	1	+
chr12	3320812	3334748	1	+
chr12	3589852	3599529	2	-
chr12	3871332	3880617	1	-
chr12	5159730	5163734	1	+
chr12	5288900	5289968	2	+
chr12	5339686	5342855	1	+
chr12	5396965	5397868	1	+
chr12	5433317	5433656	1	-
chr12	5471980	5473179	1	+
chr12	5488485	5489982	1	+
chr12	5636130	5636536	1	+
chr12	5678152	5678879	1	-
chr12	5698251	5700713	1	-
chr12	5700621	5703194	1	-
chr12	5829024	5829922	2	-
chr12	6460663	6462407	1	+
chr12	6461619	6462407	1	+
chr12	7592599	7595678	1	+
chr12	11098683	11115276	1	+
chr12	11098683	11149501	2	+
chr12	11098683	11139875	1	+
chr12	11253177	11268222	1	+
chr12	11253177	11266696	1	+
chr12	11362735	11375587	1	+
chr12	11377514	11380966	1	+
chr12	11422092	11425864	3	+
chr12	11669305	11671052	12	-
chr12	11669305	11672541	3	-
chr12	11721128	11723627	2	+
chr12	11723457	11741304	1	+
chr12	11892147	11892556	2	-
chr12	12488603	12522951	1	-
chr12	12704688	12715789	1	-
chr12	12704688	12748564	1	-
chr12	12704688	12757927	1	-
chr12	12742933	12748607	2	-
chr12	13501056	13501309	1	-
chr12	13534122	13561161	1	-
chr12	13537094	13557413	1	-
chr12	13566705	13571493	1	-
chr12	13604690	13612900	1	-
chr12	13713599	13719451	1	-
chr12	14049644	14052979	1	+
chr12	14161401	14212738	1	+
chr12	14178157	14185034	1	+
chr12	14178157	14245409	1	+
chr12	14194893	14207221	1	+
chr12	14216840	14218889	1	+
chr12	14291120	14295226	1	+
chr12	14454576	14461336	1	+
chr12	14458187	14461336	1	+
chr12	14465465	14488093	1	+
chr12	14475483	14486463	1	+
chr12	14478610	14488093	1	+
chr12	14479741	14488093	2	+
chr12	14685734	14690514	1	+
chr12	14697839	14708065	1	+
chr12	14722267	14725422	3	+
chr12	14825379	14859773	1	+
chr12	14939193	14944500	2	+
chr12	14948250	14948632	1	+
chr12	14966043	14966752	1	-
chr12	15244221	15288986	1	-
chr12	15255205	15269630	1	-
chr12	15263849	15288986	1	-
chr12	15263849	15276048	1	-
chr12	15269530	15288986	1	-
chr12	15287152	15288986	2	-
chr12	15332193	15333657	1	-
chr12	16140335	16176429	1	-
chr12	16145895	16174077	2	-
chr12	16151156	16195799	1	-
chr12	16156837	16164359	1	-
chr12	16159872	16174077	1	-
chr12	16164206	16174077	1	-
chr12	16172825	16181569	1	-
chr12	16195631	16211961	1	-
chr12	16209069	16211961	4	-
chr12	16822209	16829262	2	+
chr12	16822209	16844840	1	+
chr12	16953322	16954694	16	+
chr12	17044269	17060678	1	+
chr12	17990490	18004384	1	+
chr12	17995943	17996570	1	+
chr12	18047752	18050839	1	+
chr12	18315171	18321805	2	-
chr12	18487309	18492129	1	+
chr12	18487309	18497749	1	+
chr12	18492046	18501537	1	+
chr12	18552928	18555766	1	+
chr12	18818447	18832945	1	+
chr12	19000055	19000995	1	+
chr12	19014499	19016168	3	+
chr12	19116370	19117129	1	+
chr12	19760213	19773891	2	-
chr12	19765317	19768678	2	-
chr12	19773696	19784998	1	-
chr12	19898756	19899815	1	-
chr12	20125968	20133722	1	+
chr12	20126111	20136260	1	+
chr12	20133517	20134694	2	+
chr12	20133517	20136260	2	+
chr12	20389060	20389394	1	+
chr12	20557578	20558813	1	+
chr12	20557578	20557867	1	+
chr12	20739318	20741653	1	+
chr12	20746387	20748017	1	+
chr12	20750450	20750753	1	+
chr12	21157686	21178945	1	+
chr12	21537660	21540429	1	+
chr12	22053233	22055889	1	-
chr12	22484642	22487384	1	+
chr12	22606822	22607386	4	-
chr12	22765504	22812534	1	-
chr12	22812394	22813863	2	-
chr12	22865531	22894680	1	+
chr12	22892604	22955431	1	+
chr12	22917701	22953012	2	+
chr12	22917701	22923708	1	+
chr12	22936838	22953012	1	+
chr12	22940645	22948639	1	+
chr12	23015630	23015995	1	+
chr12	23228528	23249145	1	-
chr12	23240962	23249145	1	-
chr12	23351683	23352124	1	-
chr12	23696797	23697518	1	-
chr12	23704144	23714352	1	-
chr12	23859738	23869452	1	+
chr12	23880445	23887038	1	+
chr12	23928141	23930681	1	+
chr12	24327240	24328063	1	-
chr12	24463701	24552145	1	+
chr12	25126783	25139416	2	+
chr12	25131866	25135111	1	+
chr12	25839671	25840027	1	-
chr12	25901095	25902053	1	-
chr12	25977685	25989023	1	+
chr12	25984013	25989023	1	+
chr12	26944976	26970411	1	+
chr12	26992940	26993395	2	-
chr12	27239023	27252923	1	-
chr12	27239023	27250993	1	-
chr12	27243216	27252923	1	-
chr12	27243216	27250993	1	-
chr12	27243216	27245436	1	-
chr12	27249778	27250993	1	-
chr12	27249778	27252923	1	-
chr12	27260999	27274847	1	-
chr12	27268442	27275982	1	-
chr12	27287628	27312593	1	-
chr12	27298749	27312593	1	-
chr12	27420341	27484034	1	-
chr12	27473363	27499620	1	-
chr12	27490740	27499620	1	-
chr12	27528863	27544736	1	+
chr12	27531354	27538247	1	+
chr12	31358561	31398979	2	+
chr12	31358561	31388511	1	+
chr12	32060087	32067455	1	+
chr12	32060090	32067455	1	+
chr12	32663405	32683121	1	+
chr12	32795442	32803320	2	+
chr12	33277943	33283274	1	+
chr12	33289728	33290715	1	+
chr12	34147334	34153299	1	-
chr12	34543173	34551615	1	+
chr12	34746985	34747189	1	-
chr12	34833197	34883814	1	-
[truncated: 8,453 more rows]

## Sheet: CIRI
Identification of circRNAs by CIRI
Chrom	Start	End	Strand	Region	Hosting isoform
chr1	27360	33429	+	exon	ENSSSCG00000027257,
chr1	128198	132692	-	exon	ENSSSCG00000029697,
chr1	593018	619011	+	exon	ENSSSCG00000004008,
chr1	593018	598149	+	exon	ENSSSCG00000004008,
chr1	593018	611340	+	exon	ENSSSCG00000004008,
chr1	608276	619011	+	exon	ENSSSCG00000004008,
chr1	608276	611340	+	exon	ENSSSCG00000004008,
chr1	617145	619011	+	exon	ENSSSCG00000004008,
chr1	641934	653683	+	exon	ENSSSCG00000004008,
chr1	1600087	1620039	-	exon	ENSSSCG00000004018,
chr1	1600087	1611154	-	exon	ENSSSCG00000004018,
chr1	1639166	1663793	-	exon	ENSSSCG00000004018,
chr1	1654692	1663793	-	exon	ENSSSCG00000004018,
chr1	1657903	1663793	-	exon	ENSSSCG00000004018,
chr1	2103123	2105156	-	exon	ENSSSCG00000004023,
chr1	3314472	3324464	+	exon	ENSSSCG00000004027,
chr1	4775755	4843415	-	exon	ENSSSCG00000004029,
chr1	4822372	4843415	-	exon	ENSSSCG00000004029,
chr1	7117529	7166248	-	exon	ENSSSCG00000004039,
chr1	7594612	7598381	+	exon	ENSSSCG00000004048,
chr1	8434507	8444226	+	exon	ENSSSCG00000004058,
chr1	8586433	8598060	-	exon	ENSSSCG00000024876,
chr1	8822877	8825081	-	intergenic_region	n/a
chr1	9139951	9148944	-	exon	ENSSSCG00000030535,
chr1	9191141	9195425	-	exon	ENSSSCG00000030535,
chr1	9570465	9572299	+	intron	ENSSSCG00000035027,
chr1	9893445	9923857	-	exon	ENSSSCG00000004064,
chr1	9923614	9923857	-	exon	ENSSSCG00000004064,
chr1	10070672	10175846	-	exon	ENSSSCG00000004064,
chr1	10070672	10099544	-	exon	ENSSSCG00000004064,
chr1	10161698	10175846	-	intron	ENSSSCG00000004064,
chr1	11656690	11658867	-	exon	ENSSSCG00000004065,
chr1	12041132	12043885	-	exon	ENSSSCG00000004070,
chr1	12041132	12042596	-	exon	ENSSSCG00000004070,
chr1	12071470	12074918	-	exon	ENSSSCG00000004070,
chr1	14333291	14333436	+	intron	ENSSSCG00000025777,
chr1	14373232	14374308	-	intron	ENSSSCG00000025777,
chr1	14373973	14374308	-	exon	ENSSSCG00000025777,
chr1	14416335	14457143	-	exon	ENSSSCG00000025777,
chr1	14813380	14817648	+	exon	ENSSSCG00000004089,
chr1	16025197	16045702	+	intergenic_region	n/a
chr1	16307508	16307993	+	exon	ENSSSCG00000004106,
chr1	16366075	16374414	-	exon	ENSSSCG00000030067,
chr1	16366075	16369805	-	exon	ENSSSCG00000030067,
chr1	16368499	16374414	-	exon	ENSSSCG00000030067,
chr1	16406041	16415727	+	exon	ENSSSCG00000028867,
chr1	16406041	16420284	+	exon	ENSSSCG00000028867,
chr1	16407562	16415727	+	exon	ENSSSCG00000028867,
chr1	16558808	16566086	-	exon	ENSSSCG00000004110,
chr1	17372568	17382520	-	exon	ENSSSCG00000033175,
chr1	17372568	17416764	-	exon	ENSSSCG00000033175,
chr1	17372568	17386654	-	exon	ENSSSCG00000033175,
chr1	18947909	18978518	-	exon	ENSSSCG00000004114,
chr1	18987938	19005183	-	exon	ENSSSCG00000004114,
chr1	20571857	20633251	-	exon	ENSSSCG00000004123,
chr1	20803183	20826456	-	exon	ENSSSCG00000004123,
chr1	20821002	20826456	-	exon	ENSSSCG00000004123,
chr1	20869922	20876823	-	exon	ENSSSCG00000004123,
chr1	20873894	20888975	-	exon	ENSSSCG00000004123,
chr1	20897741	20913116	-	exon	ENSSSCG00000004123,
chr1	20908946	20913116	-	intron	ENSSSCG00000004123,
chr1	20908952	20913116	-	exon	ENSSSCG00000004123,
chr1	21445575	21475169	-	exon	ENSSSCG00000004132,
chr1	22274446	22285821	+	intron	ENSSSCG00000004138,
chr1	22280435	22285821	+	intron	ENSSSCG00000004138,
chr1	22285747	22352249	+	exon	ENSSSCG00000004138,
chr1	22697937	22706363	-	exon	ENSSSCG00000004139,
chr1	22719644	22735094	-	exon	ENSSSCG00000004139,
chr1	22731268	22735094	-	exon	ENSSSCG00000004139,
chr1	22731268	22731891	-	exon	ENSSSCG00000004139,
chr1	27465973	27478260	+	exon	ENSSSCG00000026041,
chr1	28572083	28574012	+	exon	ENSSSCG00000004166,
chr1	31971721	31991763	+	exon	ENSSSCG00000004196,
chr1	31980772	31982095	+	exon	ENSSSCG00000004196,
chr1	31980772	31991763	+	exon	ENSSSCG00000004196,
chr1	32520013	32522430	+	exon	ENSSSCG00000004199,
chr1	33217620	33315782	-	exon	ENSSSCG00000004203,
chr1	33271334	33278592	-	exon	ENSSSCG00000004203,
chr1	33280750	33284458	-	exon	ENSSSCG00000004203,
chr1	33651342	33664847	+	exon	ENSSSCG00000004205,
chr1	33651342	33696120	+	exon	ENSSSCG00000004205,
chr1	33672928	33685503	+	exon	ENSSSCG00000004205,
chr1	33672928	33696120	+	exon	ENSSSCG00000004205,
chr1	33672928	33710494	+	exon	ENSSSCG00000004205,
chr1	33672928	33676063	+	exon	ENSSSCG00000004205,
chr1	33672928	33681370	+	exon	ENSSSCG00000004205,
chr1	34166378	34213181	-	exon	ENSSSCG00000033894,
chr1	34532143	34580982	-	intron	ENSSSCG00000033619,
chr1	34896732	34897003	+	exon	ENSSSCG00000004209,
chr1	34896732	35034972	+	exon	ENSSSCG00000004209,
chr1	34896732	35005706	+	exon	ENSSSCG00000004209,
chr1	35131947	35216500	+	exon	ENSSSCG00000004209,
chr1	35131947	35158957	+	exon	ENSSSCG00000004209,
chr1	35131947	35145478	+	exon	ENSSSCG00000004209,
chr1	35138980	35158957	+	exon	ENSSSCG00000004209,
chr1	36964151	36994867	-	exon	ENSSSCG00000004220,
chr1	36976974	36991472	-	exon	ENSSSCG00000004220,
chr1	36986917	36987551	-	exon	ENSSSCG00000004220,
chr1	37122169	37167150	-	exon	ENSSSCG00000004222,
chr1	40116745	40119904	+	exon	ENSSSCG00000004237,
chr1	41095324	41104343	+	exon	ENSSSCG00000004242,
chr1	41135588	41180922	+	exon	ENSSSCG00000004242,
chr1	41144282	41180922	+	exon	ENSSSCG00000004242,
chr1	41144282	41164096	+	exon	ENSSSCG00000004242,
chr1	41144282	41177466	+	exon	ENSSSCG00000004242,
chr1	44152202	44154573	-	intergenic_region	n/a
chr1	44163930	44171097	-	exon	ENSSSCG00000020885,
chr1	44323601	44329819	-	exon	ENSSSCG00000004254,
chr1	44928513	44935340	-	exon	ENSSSCG00000004262,
chr1	45173524	45175282	+	exon	ENSSSCG00000025941,
chr1	45173524	45175843	+	exon	ENSSSCG00000025941,
chr1	45173524	45177436	+	exon	ENSSSCG00000025941,
chr1	45173527	45175282	+	exon	ENSSSCG00000025941,
chr1	45173527	45177436	+	exon	ENSSSCG00000025941,
chr1	45173527	45175843	+	exon	ENSSSCG00000025941,
chr1	45175190	45175843	+	exon	ENSSSCG00000025941,
chr1	45232834	45233102	+	exon	ENSSSCG00000035259,
chr1	49931983	49945305	-	exon	ENSSSCG00000004272,
chr1	50828904	50832203	+	intron	ENSSSCG00000004276,
chr1	50832070	50838859	+	exon	ENSSSCG00000004276,
chr1	50832070	50870956	+	exon	ENSSSCG00000004276,
chr1	50870876	50913936	+	exon	ENSSSCG00000004276,
chr1	52123108	52179177	+	exon	ENSSSCG00000004280,
chr1	52123108	52152735	+	exon	ENSSSCG00000004280,
chr1	52130362	52152735	+	exon	ENSSSCG00000004280,
chr1	52130362	52179177	+	exon	ENSSSCG00000004280,
chr1	52134346	52179177	+	exon	ENSSSCG00000004280,
chr1	52146557	52179177	+	exon	ENSSSCG00000004280,
chr1	52146557	52152735	+	exon	ENSSSCG00000004280,
chr1	53367766	53388118	-	exon	ENSSSCG00000004289,
chr1	53378683	53388118	-	exon	ENSSSCG00000004289,
chr1	53396207	53413955	-	exon	ENSSSCG00000004289,
chr1	53396207	53402802	-	exon	ENSSSCG00000004289,
chr1	53397627	53413955	-	exon	ENSSSCG00000004289,
chr1	53397627	53412018	-	exon	ENSSSCG00000004289,
chr1	53397627	53397909	-	exon	ENSSSCG00000004289,
chr1	53409338	53422321	-	exon	ENSSSCG00000004289,
chr1	53409338	53413955	-	exon	ENSSSCG00000004289,
chr1	54461976	54469709	-	exon	ENSSSCG00000004293,
chr1	54474921	54494313	-	exon	ENSSSCG00000004293,
chr1	54487286	54529700	-	exon	ENSSSCG00000004293,
chr1	54494181	54502778	-	exon	ENSSSCG00000004293,
chr1	54528562	54529700	-	exon	ENSSSCG00000004293,
chr1	54576238	54576836	-	exon	ENSSSCG00000004294,
chr1	54576238	54581212	-	exon	ENSSSCG00000004294,
chr1	55666252	55669095	+	exon	ENSSSCG00000035281,
chr1	56001862	56006189	+	exon	ENSSSCG00000004306,
chr1	56001862	56034992	+	exon	ENSSSCG00000004306,
chr1	56960510	56998082	-	exon	ENSSSCG00000004311,
chr1	57030072	57037382	-	exon	ENSSSCG00000004311,
chr1	57347201	57354474	-	exon	ENSSSCG00000004317,
chr1	57349315	57354474	-	exon	ENSSSCG00000004317,
chr1	57385549	57393736	-	exon	ENSSSCG00000004318,
chr1	57392229	57393736	-	exon	ENSSSCG00000004318,
chr1	57800378	57800994	-	exon	ENSSSCG00000004328,
chr1	57848455	57850879	+	exon	ENSSSCG00000004331,
chr1	58191656	58192463	-	intron	ENSSSCG00000004332,
chr1	66353976	66356192	-	exon	ENSSSCG00000037594,
chr1	66353976	66360969	-	exon	ENSSSCG00000037594,
chr1	67549097	67578266	-	exon	ENSSSCG00000004358,
chr1	67576479	67578266	-	exon	ENSSSCG00000004358,
chr1	67576479	67584208	-	exon	ENSSSCG00000004358,
chr1	71059257	71074187	-	exon	ENSSSCG00000004364,
chr1	72454565	72494722	-	exon	ENSSSCG00000004370,
chr1	72706053	72708342	+	exon	ENSSSCG00000004371,
chr1	72733011	72738156	+	exon	ENSSSCG00000004371,
chr1	72748688	72754060	+	exon	ENSSSCG00000004371,
chr1	72822494	72824206	+	exon	ENSSSCG00000004374,
chr1	74028418	74030320	-	exon	ENSSSCG00000004382,
chr1	74029360	74030320	-	exon	ENSSSCG00000004382,
chr1	74483177	74503320	+	intron	ENSSSCG00000040199,
chr1	74503238	74545066	+	exon	ENSSSCG00000040199,
chr1	74737037	74738472	+	exon	ENSSSCG00000004387,
chr1	75446020	75454603	-	exon	ENSSSCG00000004414,
chr1	75718076	75739270	+	exon	ENSSSCG00000004405,
chr1	75718076	75731720	+	exon	ENSSSCG00000004405,
chr1	75718076	75759232	+	exon	ENSSSCG00000004405,
chr1	75753869	75759232	+	exon	ENSSSCG00000004405,
chr1	76649382	76750287	-	exon	ENSSSCG00000037424,
chr1	76649382	76651641	-	exon	ENSSSCG00000037424,
chr1	76706570	76750287	-	intron	ENSSSCG00000037424,
chr1	76723120	76750287	-	exon	ENSSSCG00000037424,
chr1	76723120	76727151	-	exon	ENSSSCG00000037424,
chr1	77086749	77087208	+	exon	ENSSSCG00000004419,
chr1	77215898	77279692	-	exon	ENSSSCG00000025703,
chr1	77263699	77302848	-	exon	ENSSSCG00000025703,
chr1	77263699	77270404	-	exon	ENSSSCG00000025703,
chr1	77386870	77389841	-	exon	ENSSSCG00000025703,
chr1	78109183	78149434	-	exon	ENSSSCG00000004425,
chr1	78133865	78149434	-	exon	ENSSSCG00000004425,
chr1	79879036	79879318	-	exon	ENSSSCG00000004432,
chr1	79882324	79889690	-	exon	ENSSSCG00000004432,
chr1	79885359	79886038	-	exon	ENSSSCG00000004432,
chr1	84029800	84038578	+	exon	ENSSSCG00000004460,
chr1	84036049	84038578	+	exon	ENSSSCG00000004460,
chr1	84036049	84056304	+	exon	ENSSSCG00000004460,
chr1	84536323	84558464	-	intergenic_region	n/a
chr1	87134227	87153004	+	exon	ENSSSCG00000004473,
chr1	90029809	90040011	-	exon	ENSSSCG00000004478,
chr1	90172372	90193314	-	exon	ENSSSCG00000020702,
chr1	90220788	90269663	-	exon	ENSSSCG00000020702,
chr1	90238341	90269663	-	exon	ENSSSCG00000020702,
chr1	90238341	90255853	-	exon	ENSSSCG00000020702,
chr1	90254630	90255853	-	exon	ENSSSCG00000020702,
chr1	90758582	90759218	+	exon	ENSSSCG00000004484,
chr1	94314527	94315177	+	intergenic_region	n/a
chr1	94314527	94331359	+	intergenic_region	n/a
chr1	94557868	94561324	+	exon	ENSSSCG00000004490,
chr1	95527140	95532309	-	exon	ENSSSCG00000021072,
chr1	95846715	95847499	+	exon	ENSSSCG00000004500,
chr1	96462636	96483856	-	exon	ENSSSCG00000034730,
chr1	96493194	96516009	-	exon	ENSSSCG00000034730,
chr1	96493194	96507562	-	exon	ENSSSCG00000034730,
chr1	97447508	97451864	-	exon	ENSSSCG00000004505,
chr1	97447508	97484275	-	exon	ENSSSCG00000004505,
chr1	99045293	99046690	-	exon	ENSSSCG00000035007,
chr1	99850708	99876774	-	exon	ENSSSCG00000004516,
chr1	100589850	100603238	+	exon	ENSSSCG00000004524,
chr1	100589850	100613174	+	exon	ENSSSCG00000004524,
chr1	100589850	100624993	+	exon	ENSSSCG00000004524,
chr1	100589850	100626668	+	exon	ENSSSCG00000004524,
chr1	100589850	100597672	+	exon	ENSSSCG00000004524,
chr1	100589850	100626714	+	exon	ENSSSCG00000004524,
chr1	100597460	100613174	+	exon	ENSSSCG00000004524,
chr1	103695963	103697703	-	exon	ENSSSCG00000004528,
chr1	103718639	103738168	-	intron	ENSSSCG00000004528,
chr1	103798188	103815098	+	exon	ENSSSCG00000004529,
chr1	104748096	104754395	-	exon	ENSSSCG00000004535,
chr1	104748096	104774676	-	exon	ENSSSCG00000004535,
chr1	104764629	104774676	-	exon	ENSSSCG00000004535,
chr1	104845583	104846273	-	exon	ENSSSCG00000004535,
chr1	105985062	106000228	-	exon	ENSSSCG00000004537,
chr1	105987822	106000228	-	exon	ENSSSCG00000004537,
chr1	105998541	106000228	-	exon	ENSSSCG00000004537,
chr1	106148090	106150609	+	exon	ENSSSCG00000004538,
chr1	106150521	106167768	+	exon	ENSSSCG00000004538,
chr1	106150521	106171073	+	exon	ENSSSCG00000004538,
chr1	106913171	106917338	-	exon	ENSSSCG00000004542,
chr1	106923369	106924847	-	exon	ENSSSCG00000004542,
chr1	106923369	106926988	-	exon	ENSSSCG00000004542,
chr1	107028044	107031624	+	exon	ENSSSCG00000004544,
chr1	107535162	107553238	-	intron	ENSSSCG00000004551,
chr1	107552365	107553238	-	exon	ENSSSCG00000004551,
chr1	107615564	107639089	-	exon	ENSSSCG00000004552,
chr1	107763496	107763896	+	exon	ENSSSCG00000004558,
chr1	108127649	108127929	+	exon	ENSSSCG00000021588,
chr1	108325205	108338491	+	intron	ENSSSCG00000004561,
chr1	108385212	108386218	+	exon	ENSSSCG00000004561,
chr1	108447646	108486823	-	exon	ENSSSCG00000028737,
chr1	108459471	108486823	-	exon	ENSSSCG00000028737,
chr1	108482616	108486823	-	exon	ENSSSCG00000028737,
chr1	109475381	109475967	-	intron	ENSSSCG00000024088,
chr1	109475381	109584726	-	exon	ENSSSCG00000024088,
chr1	109944956	109953251	+	exon	ENSSSCG00000036431,
chr1	109966724	109975692	+	exon	ENSSSCG00000036431,
chr1	109966724	109972743	+	exon	ENSSSCG00000036431,
chr1	109970586	109980151	+	exon	ENSSSCG00000036431,
chr1	109970586	109985441	+	exon	ENSSSCG00000036431,
chr1	109970586	109988061	+	exon	ENSSSCG00000036431,
chr1	110034206	110042154	+	exon	ENSSSCG00000036431,
chr1	110034206	110044061	+	exon	ENSSSCG00000036431,
chr1	111600797	111604591	+	exon	ENSSSCG00000004578,
chr1	111623721	111625904	+	intron	ENSSSCG00000004578,
chr1	112351895	112364958	+	exon	ENSSSCG00000004582,
chr1	112815694	112844232	+	exon	ENSSSCG00000004587,
chr1	112823454	112836551	+	exon	ENSSSCG00000004587,
chr1	112968880	112974578	-	exon	ENSSSCG00000004589,
chr1	112996635	113013582	-	exon	ENSSSCG00000004589,
chr1	113012687	113013582	-	exon	ENSSSCG00000004589,
chr1	113097707	113102025	+	exon	ENSSSCG00000004592,
chr1	113097707	113131324	+	exon	ENSSSCG00000004592,
chr1	113097707	113113585	+	exon	ENSSSCG00000004592,
chr1	113111066	113131324	+	exon	ENSSSCG00000004592,
chr1	113115996	113131324	+	exon	ENSSSCG00000004592,
chr1	113128000	113128579	+	exon	ENSSSCG00000004592,
chr1	113128000	113131324	+	exon	ENSSSCG00000004592,
chr1	114716401	114727059	-	exon	ENSSSCG00000004600,
chr1	114726981	114740195	-	exon	ENSSSCG00000004600,
chr1	114737786	114740195	-	exon	ENSSSCG00000004600,
chr1	115244389	115263755	+	exon	ENSSSCG00000026960,
chr1	115526932	115587291	-	intron	ENSSSCG00000004602,
chr1	115553445	115579538	-	exon	ENSSSCG00000004602,
chr1	115553445	115595480	-	exon	ENSSSCG00000004602,
chr1	115553445	115585772	-	exon	ENSSSCG00000004602,
chr1	115575635	115595480	-	exon	ENSSSCG00000004602,
chr1	115791744	115820705	+	exon	ENSSSCG00000004603,
chr1	115818646	115820705	+	exon	ENSSSCG00000004603,
chr1	115874659	115918439	+	intergenic_region	n/a
chr1	115957998	115961418	+	exon	ENSSSCG00000037499,
chr1	116035999	116051349	-	exon	ENSSSCG00000037499,
chr1	116400801	116425776	+	intron	ENSSSCG00000004608,
chr1	119079826	119091715	+	exon	ENSSSCG00000004617,
chr1	119147938	119152992	+	exon	ENSSSCG00000004620,
chr1	119275121	119287918	+	exon	ENSSSCG00000004620,
chr1	119481810	119487008	+	exon	ENSSSCG00000004621,
chr1	119487614	119500634	+	exon	ENSSSCG00000004621,
chr1	119727110	119740313	-	exon	ENSSSCG00000004624,
chr1	119735151	119740313	-	exon	ENSSSCG00000004624,
chr1	119738115	119740313	-	exon	ENSSSCG00000004624,
chr1	119871910	119905302	-	exon	ENSSSCG00000004626,
chr1	119871910	119878715	-	exon	ENSSSCG00000004626,
chr1	119905146	119909321	-	exon	ENSSSCG00000004626,
chr1	121160753	121179866	+	exon	ENSSSCG00000004636,
chr1	121160753	121168527	+	exon	ENSSSCG00000004636,
chr1	121192913	121197117	+	exon	ENSSSCG00000004636,
chr1	121192913	121218041	+	exon	ENSSSCG00000004636,
chr1	121192913	121215234	+	exon	ENSSSCG00000004636,
chr1	121201527	121220450	+	exon	ENSSSCG00000004636,
chr1	121211636	121235683	+	exon	ENSSSCG00000004636,
chr1	121217310	121230821	+	intron	ENSSSCG00000004636,
chr1	121217326	121228255	+	exon	ENSSSCG00000004636,
chr1	121217326	121230821	+	exon	ENSSSCG00000004636,
chr1	121217326	121235683	+	exon	ENSSSCG00000004636,
chr1	121217326	121238262	+	exon	ENSSSCG00000004636,
chr1	121220383	121243452	+	exon	ENSSSCG00000004636,
chr1	121220383	121230821	+	exon	ENSSSCG00000004636,
chr1	121220383	121235683	+	exon	ENSSSCG00000004636,
chr1	121238067	121238262	+	exon	ENSSSCG00000004636,
chr1	121330342	121335034	-	exon	ENSSSCG00000004639,
chr1	121343117	121348284	-	exon	ENSSSCG00000004639,
chr1	121454891	121464032	+	exon	ENSSSCG00000004645,
chr1	121731741	121738042	+	exon	ENSSSCG00000004646,
chr1	122494128	122514658	-	exon	ENSSSCG00000004651,
chr1	122503953	122514658	-	exon	ENSSSCG00000004651,
chr1	122565598	122565937	+	exon	ENSSSCG00000004652,
chr1	122641984	122652467	+	exon	ENSSSCG00000004653,
chr1	122641984	122676949	+	exon	ENSSSCG00000004653,
chr1	122651161	122652467	+	exon	ENSSSCG00000004653,
chr1	122839928	122842172	+	exon	ENSSSCG00000004657,
chr1	122935778	122951814	+	exon	ENSSSCG00000004657,
chr1	126102976	126114467	-	exon	ENSSSCG00000004666,
chr1	126674492	126678967	-	exon	ENSSSCG00000004679,
chr1	127004146	127007054	-	intron	ENSSSCG00000004691,
chr1	127066890	127068976	-	exon	ENSSSCG00000035827,
chr1	127175568	127177694	-	exon	ENSSSCG00000023996,
chr1	127175568	127207695	-	exon	ENSSSCG00000023996,
chr1	127195769	127196307	-	exon	ENSSSCG00000023996,
chr1	127195769	127207695	-	exon	ENSSSCG00000023996,
chr1	127695623	127695864	-	exon	ENSSSCG00000004695,
chr1	127746552	127748026	+	exon	ENSSSCG00000040383,
chr1	127746552	127748761	+	exon	ENSSSCG00000040383,
chr1	127787936	127788700	-	exon	ENSSSCG00000004700,
chr1	127787936	127806205	-	exon	ENSSSCG00000004700,
chr1	127803769	127806205	-	exon	ENSSSCG00000004700,
chr1	128003103	128003586	+	exon	ENSSSCG00000031949,
chr1	128262088	128264137	-	exon	ENSSSCG00000034771,
chr1	128292703	128295890	-	exon	ENSSSCG00000004716,
chr1	128387831	128388977	+	exon	ENSSSCG00000004717,
chr1	129062737	129078630	-	exon	ENSSSCG00000004729,
chr1	129114501	129121595	+	exon	ENSSSCG00000004730,
chr1	129601956	129602162	-	exon	ENSSSCG00000004739,
chr1	129651197	129662208	-	exon	ENSSSCG00000004739,
chr1	129659979	129662208	-	exon	ENSSSCG00000004739,
chr1	129687076	129688206	-	exon	ENSSSCG00000004739,
chr1	129687251	129688206	-	exon	ENSSSCG00000004739,
chr1	130089894	130103599	-	exon	ENSSSCG00000004751,
chr1	130233523	130278467	+	exon	ENSSSCG00000004753,
chr1	130233523	130242062	+	exon	ENSSSCG00000004753,
chr1	130247720	130256849	+	exon	ENSSSCG00000004753,
chr1	130247720	130278467	+	exon	ENSSSCG00000004753,
chr1	130255152	130256849	+	exon	ENSSSCG00000004753,
chr1	130268080	130275035	+	exon	ENSSSCG00000004753,
chr1	130268080	130277126	+	exon	ENSSSCG00000004753,
chr1	131113576	131120613	-	exon	ENSSSCG00000004782,
chr1	131264914	131273283	-	exon	ENSSSCG00000039061,
chr1	131284456	131288341	-	exon	ENSSSCG00000039061,
chr1	131326820	131340853	-	exon	ENSSSCG00000039061,
chr1	132753332	132755776	+	exon	ENSSSCG00000004791,
chr1	132799814	132808127	-	exon	ENSSSCG00000004792,
chr1	132924804	132963031	-	exon	ENSSSCG00000039393,
chr1	135504911	135506952	-	intergenic_region	n/a
chr1	136157112	136164328	+	exon	ENSSSCG00000004802,
chr1	136158848	136161624	+	exon	ENSSSCG00000004802,
chr1	136175602	136179661	+	exon	ENSSSCG00000004802,
chr1	136190466	136195600	+	exon	ENSSSCG00000004802,
chr1	136190466	136199337	+	exon	ENSSSCG00000004802,
chr1	136958491	137030544	-	intron	ENSSSCG00000040466,
chr1	137420453	137423176	-	exon	ENSSSCG00000030560,
chr1	137638041	137638586	-	exon	ENSSSCG00000030560,
chr1	137910161	137926610	-	exon	ENSSSCG00000004813,
chr1	137950962	137977625	-	exon	ENSSSCG00000004813,
chr1	137967035	137977625	-	exon	ENSSSCG00000004813,
chr1	138026872	138051339	+	exon	ENSSSCG00000004814,
chr1	138048250	138051339	+	intron	ENSSSCG00000004814,
chr1	138468428	138472413	+	exon	ENSSSCG00000028771,
chr1	138468625	138486301	+	exon	ENSSSCG00000028771,
chr1	138471133	138472413	+	exon	ENSSSCG00000028771,
chr1	141920484	141927044	+	exon	ENSSSCG00000004832,
chr1	143953852	143960599	-	exon	ENSSSCG00000004845,
chr1	144935175	144939137	-	exon	ENSSSCG00000004854,
chr1	144935196	144939137	-	exon	ENSSSCG00000004854,
chr1	144967552	144968613	-	exon	ENSSSCG00000004854,
chr1	144999899	145032143	-	exon	ENSSSCG00000004854,
chr1	145568782	145572777	+	exon	ENSSSCG00000005785,
chr1	145613198	145638870	+	exon	ENSSSCG00000005785,
chr1	145634728	145638870	+	exon	ENSSSCG00000005785,
chr1	145950262	145964893	-	exon	ENSSSCG00000004856,
chr1	146128967	146194348	-	exon	ENSSSCG00000004857,
chr1	146154356	146194348	-	exon	ENSSSCG00000004857,
chr1	146174106	146200405	-	exon	ENSSSCG00000004857,
chr1	146174106	146194348	-	exon	ENSSSCG00000004857,
chr1	147703728	147767245	-	exon	ENSSSCG00000023533,
chr1	147733199	147734250	-	exon	ENSSSCG00000023533,
chr1	147750272	147767245	-	exon	ENSSSCG00000023533,
chr1	147765752	147767245	-	exon	ENSSSCG00000023533,
chr1	149521234	149542825	-	intergenic_region	n/a
chr1	149521234	149541172	-	intergenic_region	n/a
chr1	149525672	149542825	-	exon	ENSSSCG00000004869,
chr1	149525672	149541172	-	exon	ENSSSCG00000004869,
chr1	152700474	152737450	+	exon	ENSSSCG00000032574,
chr1	152723999	152737450	+	exon	ENSSSCG00000032574,
chr1	152982074	152987392	+	intergenic_region	n/a
chr1	158249937	158251386	+	exon	ENSSSCG00000004893,
chr1	158693805	158709994	-	exon	ENSSSCG00000004896,
chr1	159000920	159006320	-	exon	ENSSSCG00000004897,
chr1	159161708	159163628	-	exon	ENSSSCG00000004898,
chr1	159242075	159279434	-	exon	ENSSSCG00000004899,
chr1	159276020	159289794	-	exon	ENSSSCG00000004899,
chr1	159276020	159298536	-	exon	ENSSSCG00000004899,
chr1	159277862	159279434	-	exon	ENSSSCG00000004899,
chr1	159341717	159350894	+	exon	ENSSSCG00000004901,
chr1	159368257	159375875	+	exon	ENSSSCG00000004901,
chr1	159371732	159375875	+	exon	ENSSSCG00000004901,
chr1	159371732	159373184	+	exon	ENSSSCG00000004901,
chr1	159375767	159381432	+	exon	ENSSSCG00000004901,
chr1	159388089	159390684	+	exon	ENSSSCG00000004901,
chr1	159388089	159392907	+	exon	ENSSSCG00000004901,
chr1	161618412	161620810	+	exon	ENSSSCG00000004908,
chr1	161909790	161924707	-	exon	ENSSSCG00000034704,
chr1	161909790	161920459	-	exon	ENSSSCG00000034704,
chr1	161909790	161924704	-	exon	ENSSSCG00000034704,
chr1	161936899	161939261	-	exon	ENSSSCG00000034704,
chr1	162115331	162116033	-	exon	ENSSSCG00000004917,
chr1	163026219	163042228	+	exon	ENSSSCG00000004921,
chr1	163184041	163189984	-	exon	ENSSSCG00000004927,
chr1	163189295	163197984	-	exon	ENSSSCG00000004927,
chr1	163189295	163189984	-	exon	ENSSSCG00000004927,
chr1	163477441	163485045	-	exon	ENSSSCG00000004934,
chr1	163477441	163481032	-	exon	ENSSSCG00000004934,
chr1	163559185	163560722	+	intron	ENSSSCG00000004935,
chr1	163582925	163584738	-	exon	ENSSSCG00000004936,
chr1	163587301	163590799	-	exon	ENSSSCG00000004936,
chr1	163673701	163674120	-	exon	ENSSSCG00000004938,
chr1	163683280	163693283	-	exon	ENSSSCG00000004938,
chr1	163693167	163697214	-	exon	ENSSSCG00000004938,
chr1	163743155	163747757	-	intron	ENSSSCG00000004938,
chr1	163865640	163866262	+	exon	ENSSSCG00000032312,
chr1	164420445	164422619	+	exon	ENSSSCG00000004943,
chr1	164420445	164433489	+	exon	ENSSSCG00000004943,
chr1	164432777	164433489	+	exon	ENSSSCG00000004943,
chr1	165162980	165167901	-	exon	ENSSSCG00000004951,
chr1	165481774	165522457	+	exon	ENSSSCG00000004955,
chr1	165500422	165522457	+	exon	ENSSSCG00000004955,
chr1	165506984	165522457	+	exon	ENSSSCG00000004955,
chr1	165549895	165582736	+	exon	ENSSSCG00000004955,
chr1	165562758	165582736	+	exon	ENSSSCG00000004955,
chr1	165613693	165630713	+	exon	ENSSSCG00000004955,
chr1	165996063	165996507	+	exon	ENSSSCG00000004958,
chr1	165996063	166044981	+	exon	ENSSSCG00000004958,
chr1	165996063	166058413	+	exon	ENSSSCG00000004958,
chr1	166033284	166037819	+	exon	ENSSSCG00000004958,
chr1	166033284	166044981	+	exon	ENSSSCG00000004958,
chr1	166033284	166058413	+	exon	ENSSSCG00000004958,
chr1	166036953	166044981	+	exon	ENSSSCG00000004958,
chr1	166036953	166058413	+	exon	ENSSSCG00000004958,
chr1	166036953	166037819	+	exon	ENSSSCG00000004958,
chr1	166036953	166073595	+	exon	ENSSSCG00000004958,
chr1	166885040	166894336	+	exon	ENSSSCG00000004966,
chr1	168879757	168884181	+	intron	ENSSSCG00000004980,
chr1	169420292	169424282	-	exon	ENSSSCG00000004979,
chr1	169439749	169482865	-	exon	ENSSSCG00000004979,
chr1	169462444	169482865	-	exon	ENSSSCG00000004979,
chr1	169468880	169482865	-	exon	ENSSSCG00000004979,
chr1	169503333	169542823	-	intron	ENSSSCG00000004979,
chr1	169503333	169559446	-	exon	ENSSSCG00000004979,
chr1	169521968	169559446	-	exon	ENSSSCG00000004979,
chr1	169540497	169559446	-	exon	ENSSSCG00000004979,
chr1	169551755	169559446	-	exon	ENSSSCG00000004979,
chr1	169713656	169718710	-	exon	ENSSSCG00000004986,
chr1	169716135	169718710	-	exon	ENSSSCG00000004986,
chr1	169821469	169829760	+	exon	ENSSSCG00000004983,
chr1	169987272	169990453	+	intergenic_region	n/a
chr1	175149204	175149728	+	exon	ENSSSCG00000030679,
chr1	175244214	175246746	+	exon	ENSSSCG00000027765,
chr1	175245670	175246746	+	exon	ENSSSCG00000027765,
chr1	175311364	175311969	+	exon	ENSSSCG00000004997,
chr1	175412141	175432656	-	exon	ENSSSCG00000004999,
chr1	175422949	175443338	-	exon	ENSSSCG00000004999,
chr1	175438488	175438963	-	exon	ENSSSCG00000004999,
chr1	179650258	179656225	-	exon	ENSSSCG00000005011,
chr1	179928002	179928816	-	exon	ENSSSCG00000005015,
chr1	179956841	179958477	-	exon	ENSSSCG00000005015,
chr1	180407635	180431593	-	exon	ENSSSCG00000005021,
chr1	180431150	180431593	-	exon	ENSSSCG00000005021,
chr1	180529105	180552016	-	exon	ENSSSCG00000005022,
chr1	180665160	180665866	-	exon	ENSSSCG00000005024,
chr1	180937319	180943732	+	exon	ENSSSCG00000038422,
chr1	181383486	181394458	+	exon	ENSSSCG00000005027,
chr1	181386971	181390515	+	exon	ENSSSCG00000005027,
chr1	181739654	181743674	-	exon	ENSSSCG00000005030,
chr1	182134580	182139525	-	exon	ENSSSCG00000035934,
chr1	182147249	182161803	-	exon	ENSSSCG00000035934,
chr1	182161653	182194969	-	exon	ENSSSCG00000035934,
chr1	182184848	182194969	-	exon	ENSSSCG00000035934,
chr1	182231886	182234106	+	exon	ENSSSCG00000005036,
chr1	182335259	182341782	+	exon	ENSSSCG00000005038,
chr1	182338671	182341116	+	exon	ENSSSCG00000005038,
chr1	182340847	182341116	+	exon	ENSSSCG00000005038,
chr1	182340847	182341782	+	exon	ENSSSCG00000005038,
chr1	182341721	182348499	+	exon	ENSSSCG00000005038,
chr1	182344156	182348499	+	exon	ENSSSCG00000005038,
chr1	182373763	182385897	+	exon	ENSSSCG00000005039,
chr1	182373763	182388778	+	exon	ENSSSCG00000005039,
chr1	182373763	182384941	+	exon	ENSSSCG00000005039,
chr1	182522576	182577496	-	exon	ENSSSCG00000005041,
chr1	182527178	182527637	-	exon	ENSSSCG00000005041,
chr1	182678727	182720865	-	exon	ENSSSCG00000005043,
chr1	182688834	182720865	-	exon	ENSSSCG00000005043,
chr1	182698437	182720865	-	exon	ENSSSCG00000005043,
chr1	184048957	184049475	+	exon	ENSSSCG00000023408,
chr1	184048957	184100878	+	exon	ENSSSCG00000023408,
chr1	184715052	184717478	-	exon	ENSSSCG00000005058,
chr1	184914188	184923633	+	exon	ENSSSCG00000005060,
chr1	184914188	184920865	+	exon	ENSSSCG00000005060,
chr1	184920695	184940806	+	exon	ENSSSCG00000005060,
chr1	186442612	186443769	+	exon	ENSSSCG00000005065,
chr1	187362362	187368335	+	exon	ENSSSCG00000005072,
chr1	187388814	187401467	+	exon	ENSSSCG00000005073,
chr1	187391640	187401467	+	exon	ENSSSCG00000005073,
chr1	187391640	187411824	+	exon	ENSSSCG00000005073,
chr1	187401201	187411824	+	exon	ENSSSCG00000005073,
chr1	189746194	189748073	+	exon	ENSSSCG00000005090,
chr1	189746194	189757590	+	exon	ENSSSCG00000005090,
chr1	189746194	189769062	+	exon	ENSSSCG00000005090,
chr1	189748000	189763655	+	exon	ENSSSCG00000005090,
chr1	189757487	189769062	+	exon	ENSSSCG00000005090,
chr1	189763515	189809078	+	exon	ENSSSCG00000005090,
chr1	190336387	190367567	+	exon	ENSSSCG00000005095,
chr1	190648253	190649258	+	exon	ENSSSCG00000005096,
chr1	190648253	190654424	+	exon	ENSSSCG00000005096,
chr1	193950368	193954291	-	exon	ENSSSCG00000005110,
chr1	193982328	193987220	-	exon	ENSSSCG00000005110,
chr1	194001520	194011399	-	exon	ENSSSCG00000005110,
chr1	194038570	194064182	-	exon	ENSSSCG00000005110,
chr1	194178416	194179870	-	exon	ENSSSCG00000005110,
chr1	200899063	200922046	-	exon	ENSSSCG00000005135,
chr1	200918911	200922046	-	exon	ENSSSCG00000005135,
chr1	201246168	201253312	+	intergenic_region	n/a
chr1	201673450	201718049	-	intergenic_region	n/a
chr1	201715725	201718049	-	intron	ENSSSCG00000035294,
chr1	202156543	202180917	-	exon	ENSSSCG00000028406,
chr1	202188216	202228210	-	exon	ENSSSCG00000028406,
chr1	202207302	202228210	-	exon	ENSSSCG00000028406,
chr1	202536297	202536998	+	exon	ENSSSCG00000005166,
chr1	203446049	203446187	+	exon	ENSSSCG00000005169,
chr1	203451211	203476159	-	exon	ENSSSCG00000005170,
chr1	203484687	203516233	-	exon	ENSSSCG00000005170,
chr1	203502034	203504966	-	exon	ENSSSCG00000005170,
chr1	203515105	203537078	-	exon	ENSSSCG00000005170,
chr1	203531906	203537078	-	exon	ENSSSCG00000005170,
chr1	203531906	203547745	-	exon	ENSSSCG00000005170,
chr1	203531906	203561227	-	exon	ENSSSCG00000005170,
chr1	203536417	203538914	-	exon	ENSSSCG00000005170,
chr1	203560906	203561227	-	exon	ENSSSCG00000005170,
chr1	203685646	203694104	+	exon	ENSSSCG00000035863,
chr1	203685646	203685979	+	exon	ENSSSCG00000035863,
chr1	203685646	203692596	+	exon	ENSSSCG00000035863,
chr1	203689746	203694104	+	exon	ENSSSCG00000035863,
chr1	203721933	203740464	+	exon	ENSSSCG00000005173,
chr1	203721933	203759564	+	exon	ENSSSCG00000005173,
chr1	204028924	204099075	-	exon	ENSSSCG00000040366,
chr1	205515399	205527866	-	exon	ENSSSCG00000005178,
chr1	207190793	207194651	+	exon	ENSSSCG00000005183,
chr1	208189592	208203474	+	intron	ENSSSCG00000005190,
chr1	208189592	208322341	+	exon	ENSSSCG00000005190,
chr1	208322288	208364542	+	exon	ENSSSCG00000005190,
chr1	208355018	208364542	+	exon	ENSSSCG00000005190,
chr1	208360882	208364542	+	exon	ENSSSCG00000005190,
chr1	208394068	208407707	+	exon	ENSSSCG00000005190,
chr1	208986997	208987753	+	intergenic_region	n/a
chr1	209234754	209244141	+	exon	ENSSSCG00000005191,
chr1	209261053	209286611	+	exon	ENSSSCG00000005191,
chr1	209328952	209330339	+	exon	ENSSSCG00000005191,
chr1	215256334	215266887	-	exon	ENSSSCG00000005198,
chr1	215350450	215389275	-	intron	ENSSSCG00000005198,
chr1	215371012	215389275	-	exon	ENSSSCG00000005198,
chr1	215745865	215754716	-	exon	ENSSSCG00000005201,
chr1	215754530	215771774	-	exon	ENSSSCG00000005201,
chr1	216148995	216177064	+	exon	ENSSSCG00000005205,
chr1	216148995	216199042	+	exon	ENSSSCG00000005205,
chr1	216209672	216210109	+	intron	ENSSSCG00000005205,
chr1	216332768	216333648	+	exon	ENSSSCG00000005207,
chr1	216332768	216341225	+	exon	ENSSSCG00000005207,
chr1	216427782	216434127	-	exon	ENSSSCG00000005208,
chr1	216860761	216918840	-	exon	ENSSSCG00000005215,
chr1	217786693	217794582	+	intron	ENSSSCG00000005224,
chr1	217793463	217794582	+	exon	ENSSSCG00000005224,
chr1	218569068	218573173	+	exon	ENSSSCG00000005225,
chr1	219000459	219005882	+	exon	ENSSSCG00000005227,
chr1	219000459	219002085	+	exon	ENSSSCG00000005227,
chr1	219000459	219008904	+	exon	ENSSSCG00000005227,
chr1	219010541	219028462	+	exon	ENSSSCG00000005227,
chr1	219640995	219661659	-	exon	ENSSSCG00000005232,
chr1	219661442	219802079	-	exon	ENSSSCG00000005232,
chr1	219700610	219730732	-	exon	ENSSSCG00000005232,
chr1	221527959	221545099	+	exon	ENSSSCG00000005241,
chr1	221655410	221675520	+	exon	ENSSSCG00000005243,
chr1	221778750	221783005	+	exon	ENSSSCG00000005243,
chr1	222159435	222164144	+	exon	ENSSSCG00000027161,
chr1	222211742	222244262	+	exon	ENSSSCG00000027161,
chr1	222225880	222244262	+	exon	ENSSSCG00000027161,
chr1	222581769	222582812	+	exon	ENSSSCG00000005247,
chr1	222582659	222587312	+	exon	ENSSSCG00000005247,
chr1	223565045	223572485	+	exon	ENSSSCG00000005255,
chr1	223593900	223596456	+	exon	ENSSSCG00000005255,
chr1	223608485	223647693	+	exon	ENSSSCG00000005255,
chr1	223722952	223723842	-	exon	ENSSSCG00000021646,
chr1	225154199	225159215	-	exon	ENSSSCG00000021802,
chr1	225718524	225725336	+	intergenic_region	n/a
chr1	227918274	228034973	-	intergenic_region	n/a
chr1	227998338	228037829	-	intergenic_region	n/a
chr1	227999397	228037829	-	intergenic_region	n/a
chr1	228032343	228037829	-	intergenic_region	n/a
chr1	228063646	228083143	-	exon	ENSSSCG00000005271,
chr1	228980934	228986161	+	exon	ENSSSCG00000023520,
chr1	229603970	229612467	-	exon	ENSSSCG00000039009,
chr1	230091380	230101283	+	intron	ENSSSCG00000038483,
chr1	230100570	230101283	+	exon	ENSSSCG00000038483,
chr1	230115813	230132023	+	intergenic_region	n/a
chr1	230153588	230165396	+	exon	ENSSSCG00000005282,
chr1	230672892	230676025	-	exon	ENSSSCG00000033763,
chr1	230672892	230694252	-	exon	ENSSSCG00000033763,
chr1	230795822	230796006	-	exon	ENSSSCG00000033763,
chr1	231088302	231094062	+	exon	ENSSSCG00000005286,
chr1	235969399	235983215	+	exon	ENSSSCG00000005305,
chr1	235969399	235999042	+	exon	ENSSSCG00000005305,
chr1	235970787	235977603	+	exon	ENSSSCG00000005305,
chr1	236043218	236061313	+	exon	ENSSSCG00000005305,
chr1	236443681	236443821	+	intron	ENSSSCG00000005317,
chr1	236521940	236522230	+	exon	ENSSSCG00000005322,
chr1	236979547	236982092	+	exon	ENSSSCG00000037131,
chr1	236979547	236987058	+	exon	ENSSSCG00000037131,
chr1	237117717	237127531	-	exon	ENSSSCG00000005343,
chr1	237126956	237127531	-	exon	ENSSSCG00000005343,
chr1	237157191	237157384	-	exon	ENSSSCG00000005343,
chr1	238015229	238018002	+	exon	ENSSSCG00000005346,
chr1	238247724	238251089	-	exon	ENSSSCG00000005350,
chr1	238620343	238622572	+	exon	ENSSSCG00000005356,
chr1	239514750	239517429	+	exon	ENSSSCG00000005366,
chr1	239800374	239832709	-	exon	ENSSSCG00000005371,
chr1	240889406	240900266	+	exon	ENSSSCG00000005382,
chr1	241809453	241824281	-	exon	ENSSSCG00000040634,
chr1	241979932	242018942	+	exon	ENSSSCG00000005388,
chr1	241979932	242004276	+	exon	ENSSSCG00000005388,
chr1	242111791	242113126	-	exon	ENSSSCG00000005389,
chr1	242111791	242116331	-	exon	ENSSSCG00000005389,
chr1	242815932	242822693	+	intron	ENSSSCG00000005393,
chr1	246238089	246243861	-	exon	ENSSSCG00000005423,
chr1	246238089	246257483	-	intergenic_region	n/a
chr1	246866711	246874253	+	exon	ENSSSCG00000005427,
chr1	248463645	248474020	+	exon	ENSSSCG00000005436,
chr1	248463645	248483274	+	exon	ENSSSCG00000005436,
chr1	248467612	248474020	+	exon	ENSSSCG00000005436,
chr1	248468603	248474020	+	exon	ENSSSCG00000005436,
chr1	249962772	249971713	+	exon	ENSSSCG00000005441,
chr1	249967177	249971713	+	exon	ENSSSCG00000005441,
chr1	250014513	250014805	-	exon	ENSSSCG00000005444,
chr1	250042850	250058264	-	exon	ENSSSCG00000005444,
chr1	250097104	250139692	-	exon	ENSSSCG00000005444,
chr1	250119554	250139692	-	exon	ENSSSCG00000005444,
chr1	250119554	250119951	-	exon	ENSSSCG00000005444,
chr1	250330506	250331725	-	intron	ENSSSCG00000005446,
chr1	250462714	250488387	-	exon	ENSSSCG00000005449,
chr1	252257282	252260510	-	exon	ENSSSCG00000005459,
chr1	252271582	252280307	-	exon	ENSSSCG00000005459,
chr1	252271582	252289498	-	exon	ENSSSCG00000005459,
chr1	252431131	252435454	+	intron	ENSSSCG00000021386,ENSSSCG00000005460,
chr1	252995231	253000302	-	exon	ENSSSCG00000005466,
chr1	253012174	253014268	-	exon	ENSSSCG00000005466,
chr1	253012174	253056412	-	exon	ENSSSCG00000005466,
chr1	253024490	253038696	-	exon	ENSSSCG00000005466,
chr1	253024490	253056412	-	exon	ENSSSCG00000005466,
chr1	253034155	253056412	-	exon	ENSSSCG00000005466,
chr1	253034155	253038696	-	exon	ENSSSCG00000005466,
chr1	253514454	253532500	+	exon	ENSSSCG00000005471,
chr1	253514454	253516759	+	exon	ENSSSCG00000005471,
chr1	253828447	253853400	-	exon	ENSSSCG00000005477,
chr1	253842995	253853400	-	exon	ENSSSCG00000005477,
chr1	253852814	253853400	-	exon	ENSSSCG00000005477,
chr1	254204182	254204421	+	intron	ENSSSCG00000005481,
chr1	261237316	261246048	-	exon	ENSSSCG00000005514,ENSSSCG00000034749,
chr1	261237316	261241906	-	exon	ENSSSCG00000005514,
chr1	261242623	261246048	-	intron	ENSSSCG00000005514,ENSSSCG00000034749,
chr1	263804087	263814895	-	exon	ENSSSCG00000005575,
chr1	263873074	263916275	+	exon	ENSSSCG00000020743,
chr1	263873074	263940366	+	exon	ENSSSCG00000020743,
chr1	263902377	263940366	+	exon	ENSSSCG00000020743,
chr1	263932775	263940366	+	exon	ENSSSCG00000020743,
chr1	263932775	263985711	+	exon	ENSSSCG00000020743,
chr1	264009752	264020783	+	exon	ENSSSCG00000020743,
chr1	264019073	264020783	+	exon	ENSSSCG00000020743,
chr1	264455217	264486004	-	exon	ENSSSCG00000005585,
chr1	264644525	264660644	-	exon	ENSSSCG00000005585,
chr1	264644525	264782210	-	exon	ENSSSCG00000005585,
chr1	265703738	265704958	-	exon	ENSSSCG00000005597,
chr1	265729318	265733324	-	exon	ENSSSCG00000005598,
chr1	265729318	265751600	-	exon	ENSSSCG00000005598,
chr1	265991805	265996371	+	exon	ENSSSCG00000005602,
chr1	266296454	266312704	-	exon	ENSSSCG00000029169,
chr1	266296454	266321713	-	exon	ENSSSCG00000029169,
chr1	266309590	266312704	-	exon	ENSSSCG00000029169,
chr1	266309590	266321713	-	exon	ENSSSCG00000029169,
chr1	266567618	266575250	+	exon	ENSSSCG00000005604,
chr1	266981815	266999838	+	exon	ENSSSCG00000036926,
chr1	266981815	267028781	+	exon	ENSSSCG00000036926,
chr1	267525106	267545008	+	exon	ENSSSCG00000005607,
chr1	268635655	268638082	-	intron	ENSSSCG00000005640,
chr1	269145152	269146298	+	exon	ENSSSCG00000005660,
chr1	269180444	269182615	-	exon	ENSSSCG00000005663,
chr1	270112842	270131332	-	exon	ENSSSCG00000005689,
chr1	270205474	270211454	+	exon	ENSSSCG00000038868,
chr1	270899688	270900268	+	exon	ENSSSCG00000005706,
chr1	271146967	271147908	+	exon	ENSSSCG00000005711,
chr1	271177714	271182296	+	exon	ENSSSCG00000005711,
chr1	271368900	271377311	+	exon	ENSSSCG00000005715,
chr1	271368904	271384260	+	exon	ENSSSCG00000005715,
chr1	271551340	271561877	-	exon	ENSSSCG00000005719,
chr1	272101949	272127308	-	exon	ENSSSCG00000005724,
chr1	272101949	272138444	-	exon	ENSSSCG00000005724,
chr1	272122492	272127308	-	exon	ENSSSCG00000005724,
chr1	272399435	272418352	-	exon	ENSSSCG00000005729,
chr1	272666233	272670206	-	exon	ENSSSCG00000027595,
chr1	273342081	273347767	-	exon	ENSSSCG00000005743,
chr1	273343550	273347767	-	exon	ENSSSCG00000005743,
chr1	273771031	273777030	+	exon	ENSSSCG00000038220,
chr10	579128	598867	-	exon	ENSSSCG00000010801,
chr10	587694	598867	-	exon	ENSSSCG00000010801,
chr10	734757	748642	+	exon	ENSSSCG00000010802,
chr10	734757	761696	+	exon	ENSSSCG00000010802,
chr10	1556375	1675268	+	intergenic_region	n/a
chr10	5770011	5777849	+	exon	ENSSSCG00000010811,
chr10	5777659	5797656	+	exon	ENSSSCG00000010811,
chr10	5788969	5806269	+	exon	ENSSSCG00000010811,
chr10	7667574	7689038	-	exon	ENSSSCG00000027207,
chr10	8265577	8271193	+	exon	ENSSSCG00000027846,
chr10	8265577	8271414	+	intron	ENSSSCG00000027846,
chr10	8382470	8386109	+	exon	ENSSSCG00000010816,
chr10	8950586	8978128	+	exon	ENSSSCG00000010817,
chr10	9605707	9614246	-	exon	ENSSSCG00000010821,
chr10	9739375	9739872	-	exon	ENSSSCG00000010824,
chr10	10038504	10066131	+	exon	ENSSSCG00000010825,
chr10	10057154	10066131	+	exon	ENSSSCG00000010825,
chr10	11344911	11346876	-	exon	ENSSSCG00000010833,ENSSSCG00000010832,
chr10	11446256	11459646	-	exon	ENSSSCG00000010835,
chr10	11446256	11451376	-	exon	ENSSSCG00000010835,
chr10	11469821	11472476	+	exon	ENSSSCG00000010836,
chr10	11654269	11654794	+	exon	ENSSSCG00000035479,
chr10	11693303	11694808	+	exon	ENSSSCG00000035479,
chr10	12408525	12409235	+	intron	ENSSSCG00000028178,
chr10	12415958	12417836	-	exon	ENSSSCG00000028178,
chr10	12564139	12564881	+	exon	ENSSSCG00000024484,
chr10	12595562	12602812	-	exon	ENSSSCG00000026705,
chr10	12654334	12657277	-	exon	ENSSSCG00000026705,
chr10	12721730	12725565	-	exon	ENSSSCG00000010849,
chr10	12738033	12744135	-	exon	ENSSSCG00000010849,
chr10	13491755	13527498	-	exon	ENSSSCG00000010850,
chr10	13516188	13527498	-	exon	ENSSSCG00000010850,
chr10	13775656	13778500	+	intron	ENSSSCG00000010854,
chr10	13780266	13788201	-	exon	ENSSSCG00000010854,
chr10	14141043	14145886	-	exon	ENSSSCG00000021310,
chr10	14171012	14175682	-	exon	ENSSSCG00000021310,
chr10	14686582	14719534	-	exon	ENSSSCG00000010862,
chr10	14786194	14794270	-	exon	ENSSSCG00000010862,
chr10	15175030	15179109	+	exon	ENSSSCG00000034481,
chr10	16345992	16359066	+	exon	ENSSSCG00000035136,
chr10	16541738	16607933	-	exon	ENSSSCG00000010872,
chr10	16541738	16730354	-	exon	ENSSSCG00000010872,
chr10	16560321	16607933	-	exon	ENSSSCG00000010872,
chr10	16569755	16730354	-	exon	ENSSSCG00000010872,
chr10	17467676	17468635	-	intergenic_region	n/a
chr10	17468461	17468635	-	intergenic_region	n/a
chr10	17478592	17481300	-	exon	ENSSSCG00000010877,
chr10	19174308	19181256	+	intergenic_region	n/a
chr10	19806730	19813461	+	exon	ENSSSCG00000029411,
chr10	19806730	19812293	+	exon	ENSSSCG00000029411,
chr10	19806730	19815124	+	exon	ENSSSCG00000029411,
chr10	19814702	19815124	+	exon	ENSSSCG00000029411,
chr10	19949148	19952852	+	exon	ENSSSCG00000024618,
chr10	20060944	20073030	-	exon	ENSSSCG00000010897,
chr10	20060944	20078273	-	exon	ENSSSCG00000010897,
chr10	20065005	20073030	-	exon	ENSSSCG00000010897,
chr10	20423359	20492105	-	exon	ENSSSCG00000010900,
chr10	20428975	20492105	-	exon	ENSSSCG00000010900,
chr10	20438111	20481282	-	exon	ENSSSCG00000010900,
chr10	20438111	20492105	-	exon	ENSSSCG00000010900,
chr10	20455784	20487072	-	exon	ENSSSCG00000010900,
chr10	20455784	20492105	-	exon	ENSSSCG00000010900,
chr10	20469603	20492105	-	exon	ENSSSCG00000010900,
chr10	20469603	20492148	-	intron	ENSSSCG00000010900,
chr10	20481181	20492105	-	exon	ENSSSCG00000010900,
chr10	20487027	20522085	-	exon	ENSSSCG00000010900,
chr10	20508015	20536074	-	exon	ENSSSCG00000010900,
chr10	21687449	21692170	-	intergenic_region	n/a
chr10	23313239	23321391	+	exon	ENSSSCG00000027314,
chr10	24535474	24575688	+	exon	ENSSSCG00000010925,
chr10	24768866	24781769	-	exon	ENSSSCG00000010928,
chr10	24781611	24784588	-	exon	ENSSSCG00000010928,
chr10	24788311	24799565	-	exon	ENSSSCG00000010928,
chr10	24795546	24799565	-	exon	ENSSSCG00000010928,
chr10	24818305	24818470	+	intron	ENSSSCG00000010928,
chr10	24910301	24911744	-	exon	ENSSSCG00000010931,
chr10	25205440	25206443	+	exon	ENSSSCG00000011171,
chr10	25600746	25606516	-	exon	ENSSSCG00000035956,
chr10	25606345	25629631	-	exon	ENSSSCG00000035956,
chr10	25750796	25760758	+	exon	ENSSSCG00000039368,
chr10	25750796	25773920	+	exon	ENSSSCG00000039368,
chr10	25760691	25779015	+	exon	ENSSSCG00000039368,
chr10	26180874	26195694	-	exon	ENSSSCG00000010941,
chr10	26180874	26212860	-	exon	ENSSSCG00000010941,
chr10	29004981	29035802	+	exon	ENSSSCG00000010952,
chr10	29028959	29035802	+	exon	ENSSSCG00000010952,
chr10	29033187	29035802	+	exon	ENSSSCG00000010952,
chr10	29037750	29038934	+	exon	ENSSSCG00000010952,
chr10	29037750	29039234	+	intron	ENSSSCG00000010952,
chr10	29228248	29230143	-	exon	ENSSSCG00000010956,
chr10	30329693	30428640	-	exon	ENSSSCG00000010959,
chr10	30379837	30389167	-	exon	ENSSSCG00000010959,
chr10	30584323	30605006	-	intergenic_region	n/a
chr10	30632462	30634976	-	intergenic_region	n/a
chr10	30710066	30712836	+	exon	ENSSSCG00000010960,
chr10	31153774	31175932	+	exon	ENSSSCG00000026087,
chr10	31295417	31303258	+	exon	ENSSSCG00000021005,
chr10	31295417	31297552	+	exon	ENSSSCG00000021005,
chr10	31303100	31308910	+	exon	ENSSSCG00000021005,
chr10	31969409	31981183	+	exon	ENSSSCG00000040707,
chr10	31969409	31983374	+	exon	ENSSSCG00000040707,
chr10	32569928	32588655	-	exon	ENSSSCG00000021761,
chr10	32569928	32576571	-	exon	ENSSSCG00000021761,
chr10	32800584	32819154	+	exon	ENSSSCG00000010987,
chr10	32800584	32827084	+	exon	ENSSSCG00000010987,
chr10	32817449	32824801	+	exon	ENSSSCG00000010987,
chr10	32817449	32827084	+	exon	ENSSSCG00000010987,
chr10	32840622	32850936	+	exon	ENSSSCG00000010987,
chr10	32840622	32843863	+	exon	ENSSSCG00000010987,
chr10	32855276	32862936	+	exon	ENSSSCG00000010987,
chr10	32859214	32870103	+	exon	ENSSSCG00000010987,
chr10	32912151	32933076	-	exon	ENSSSCG00000034725,
chr10	33072026	33073788	-	intergenic_region	n/a
chr10	33141973	33143114	-	exon	ENSSSCG00000010994,
chr10	33167907	33173745	-	exon	ENSSSCG00000010994,
chr10	33229551	33231237	+	exon	ENSSSCG00000010996,
chr10	33229551	33237248	+	exon	ENSSSCG00000010996,
chr10	33229551	33238811	+	exon	ENSSSCG00000010996,
chr10	33367628	33369685	+	intron	ENSSSCG00000035454,
chr10	33374240	33377724	+	exon	ENSSSCG00000035454,
chr10	33377620	33378645	+	exon	ENSSSCG00000035454,
chr10	33404037	33423785	+	exon	ENSSSCG00000010999,
chr10	33434993	33442076	-	exon	ENSSSCG00000011000,
chr10	33610154	33692048	+	intergenic_region	n/a
chr10	33891306	33943833	+	intron	ENSSSCG00000030408,
chr10	33956557	33966721	-	exon	ENSSSCG00000023807,
chr10	35916934	35940213	+	intergenic_region	n/a
chr10	38922500	38997996	+	intergenic_region	n/a
chr10	38991733	38997996	+	exon	ENSSSCG00000028655,
chr10	39548178	39569959	-	exon	ENSSSCG00000011070,
chr10	39984146	39996009	+	exon	ENSSSCG00000011013,
chr10	39984146	39991160	+	exon	ENSSSCG00000011013,
chr10	40008568	40011985	+	exon	ENSSSCG00000011013,
chr10	40015293	40018911	+	exon	ENSSSCG00000011013,
chr10	40773819	40779764	+	intron	ENSSSCG00000011018,
chr10	41229017	41257277	+	exon	ENSSSCG00000011022,
chr10	41434069	41436115	+	exon	ENSSSCG00000011022,
chr10	42061873	42079536	+	intergenic_region	n/a
chr10	42063516	42079536	+	intergenic_region	n/a
chr10	42063516	42147610	+	intergenic_region	n/a
chr10	42063516	42194913	+	intergenic_region	n/a
chr10	42063616	42079536	+	intergenic_region	n/a
chr10	42464388	42490463	-	exon	ENSSSCG00000011026,
chr10	42468077	42479927	-	exon	ENSSSCG00000011026,
chr10	42468077	42490463	-	exon	ENSSSCG00000011026,
chr10	42468077	42498047	-	exon	ENSSSCG00000011026,
chr10	42490402	42510787	-	exon	ENSSSCG00000011026,
chr10	42497973	42510787	-	exon	ENSSSCG00000011026,
chr10	42501579	42510787	-	exon	ENSSSCG00000011026,
chr10	42509363	42518674	-	exon	ENSSSCG00000011026,
chr10	42509363	42510787	-	exon	ENSSSCG00000011026,
chr10	42552538	42555555	-	exon	ENSSSCG00000011026,
chr10	42646861	42647382	-	exon	ENSSSCG00000011027,
chr10	42669134	42669632	-	exon	ENSSSCG00000011027,
chr10	42670779	42672427	-	exon	ENSSSCG00000011027,
chr10	43443984	43446589	-	exon	ENSSSCG00000021309,
chr10	43523156	43524659	+	exon	ENSSSCG00000011033,
chr10	44928914	44935556	-	exon	ENSSSCG00000011041,
chr10	44934036	44935556	-	exon	ENSSSCG00000011041,
chr10	45130708	45142435	+	exon	ENSSSCG00000011042,
chr10	45992309	46006364	+	exon	ENSSSCG00000011045,
chr10	45992309	46022353	+	exon	ENSSSCG00000011045,
chr10	45992309	46027671	+	exon	ENSSSCG00000011045,
chr10	46002429	46006364	+	exon	ENSSSCG00000011045,
chr10	46538292	46548424	+	exon	ENSSSCG00000011047,
chr10	48039240	48043296	-	intron	ENSSSCG00000011056,
chr10	48085786	48110019	-	exon	ENSSSCG00000026354,
chr10	48101948	48110019	-	exon	ENSSSCG00000026354,
chr10	48164054	48164543	-	intergenic_region	n/a
chr10	48206021	48213577	+	exon	ENSSSCG00000032984,
chr10	48206021	48225744	+	exon	ENSSSCG00000032984,
chr10	48532138	48562529	-	exon	ENSSSCG00000023247,
chr10	48538970	48562529	-	exon	ENSSSCG00000023247,
chr10	48814823	48820979	-	exon	ENSSSCG00000011066,
chr10	48815859	48818387	-	exon	ENSSSCG00000011066,
chr10	48831898	48849331	-	exon	ENSSSCG00000011066,
chr10	48904200	48911562	-	exon	ENSSSCG00000011064,
chr10	48911448	48916899	-	exon	ENSSSCG00000011064,
chr10	50381461	50386113	+	exon	ENSSSCG00000028135,
chr10	50624808	50631082	+	exon	ENSSSCG00000011074,
chr10	50624808	50640498	+	exon	ENSSSCG00000011074,
chr10	50648677	50649078	+	exon	ENSSSCG00000011074,
chr10	50657248	50665836	+	exon	ENSSSCG00000011074,
chr10	50663344	50665836	+	exon	ENSSSCG00000011074,
chr10	50663344	50664576	+	exon	ENSSSCG00000011074,
chr10	50709414	50757421	-	exon	ENSSSCG00000011075,
chr10	50716562	50757421	-	exon	ENSSSCG00000011075,
chr10	50735172	50757421	-	intron	ENSSSCG00000011075,
chr10	50751196	50757421	-	exon	ENSSSCG00000011075,
chr10	51020669	51020952	-	exon	ENSSSCG00000011075,
chr10	52338386	52340200	+	exon	ENSSSCG00000011079,
chr10	52929650	52963179	+	exon	ENSSSCG00000026001,
chr10	53089612	53104147	-	exon	ENSSSCG00000011085,
chr10	53103969	53169782	-	exon	ENSSSCG00000011085,
chr10	53136273	53202893	-	exon	ENSSSCG00000011085,
chr10	53158220	53202893	-	intron	ENSSSCG00000011085,
chr10	53169687	53202893	-	exon	ENSSSCG00000011085,
chr10	53169687	53245866	-	exon	ENSSSCG00000011085,
chr10	53197803	53202893	-	exon	ENSSSCG00000011085,
chr10	53785702	53795981	+	exon	ENSSSCG00000011090,
chr10	53785702	53858471	+	exon	ENSSSCG00000011090,
chr10	53795829	53858471	+	exon	ENSSSCG00000011090,
chr10	53795829	53870674	+	exon	ENSSSCG00000011090,
chr10	53795829	53888015	+	exon	ENSSSCG00000011090,
chr10	53795829	53841038	+	exon	ENSSSCG00000011090,
chr10	56010376	56027816	+	intron	ENSSSCG00000032896,
chr10	56285822	56299718	-	exon	ENSSSCG00000011102,
chr10	56466524	56478719	+	intergenic_region	n/a
chr10	57126906	57137646	-	intron	ENSSSCG00000011103,
chr10	57137536	57194267	-	exon	ENSSSCG00000011103,
chr10	57167881	57212680	-	exon	ENSSSCG00000011103,
chr10	57184079	57194267	-	exon	ENSSSCG00000011103,
chr10	57201061	57212680	-	exon	ENSSSCG00000011103,
chr10	57211007	57212680	-	exon	ENSSSCG00000011103,
chr10	57227399	57252743	-	exon	ENSSSCG00000011103,
chr10	57250368	57252743	-	exon	ENSSSCG00000011103,
chr10	57719627	57721859	-	exon	ENSSSCG00000011104,
chr10	57752327	57768401	-	intergenic_region	n/a
chr10	59745682	59752288	-	exon	ENSSSCG00000011112,
chr10	59793866	59814815	-	exon	ENSSSCG00000011114,
chr10	59804790	59813097	-	exon	ENSSSCG00000011114,
chr10	59834812	59836887	-	exon	ENSSSCG00000039539,
chr10	59913525	59919743	+	exon	ENSSSCG00000011117,
chr10	59913525	59926809	+	exon	ENSSSCG00000011117,
chr10	60258613	60355127	+	exon	ENSSSCG00000011120,
chr10	63609227	63610432	+	exon	ENSSSCG00000033095,
chr10	63619894	63626141	+	exon	ENSSSCG00000033095,
chr10	65174467	65191886	+	exon	ENSSSCG00000011137,
chr10	65179075	65191886	+	exon	ENSSSCG00000011137,
chr10	65187800	65191886	+	exon	ENSSSCG00000011137,
chr10	65187800	65188643	+	exon	ENSSSCG00000011137,
chr10	65201943	65203703	-	exon	ENSSSCG00000011136,
chr10	65244719	65247076	-	exon	ENSSSCG00000011136,
chr10	65246553	65247076	-	exon	ENSSSCG00000011136,
chr10	65582654	65630400	+	exon	ENSSSCG00000011147,
chr10	65589730	65617693	+	intron	ENSSSCG00000011147,
chr10	65589730	65636205	+	exon	ENSSSCG00000011147,
chr10	68491183	68492059	-	exon	ENSSSCG00000029602,
chr10	68491183	68518239	-	exon	ENSSSCG00000029602,
chr10	68491183	68507352	-	exon	ENSSSCG00000029602,
chr10	68509412	68518239	-	exon	ENSSSCG00000029602,
chr10	68512778	68518239	-	exon	ENSSSCG00000029602,
chr10	68562244	68562567	-	exon	ENSSSCG00000028602,
chr10	68610593	68610954	-	intron	ENSSSCG00000040837,
chr10	68645780	68688441	+	exon	ENSSSCG00000011162,
chr10	68645780	68692165	+	exon	ENSSSCG00000011162,
chr10	68645780	68684692	+	exon	ENSSSCG00000011162,
chr10	68670661	68692165	+	exon	ENSSSCG00000011162,
chr10	68671265	68688441	+	exon	ENSSSCG00000011162,
chr10	68684614	68688441	+	exon	ENSSSCG00000011162,
chr10	68959424	68961182	+	exon	ENSSSCG00000011163,
chr10	68959424	68970531	+	exon	ENSSSCG00000011163,
chr10	69175006	69235186	-	exon	ENSSSCG00000011166,
chr10	69201376	69235186	-	exon	ENSSSCG00000011166,
chr10	69212794	69235186	-	exon	ENSSSCG00000011166,
chr10	69233682	69235186	-	intron	ENSSSCG00000011166,
chr11	376042	380465	+	exon	ENSSSCG00000022957,
chr11	416792	420681	+	exon	ENSSSCG00000022957,
chr11	416792	418852	+	exon	ENSSSCG00000022957,
chr11	458635	468238	+	exon	ENSSSCG00000009570,
chr11	533609	534240	-	intron	ENSSSCG00000009569,
chr11	534135	562934	-	exon	ENSSSCG00000009569,
chr11	543480	562934	-	exon	ENSSSCG00000009569,
chr11	552302	555980	-	exon	ENSSSCG00000009569,
chr11	552302	562934	-	exon	ENSSSCG00000009569,
chr11	555885	562934	-	exon	ENSSSCG00000009569,
chr11	583672	587892	-	exon	ENSSSCG00000009568,
chr11	603753	604571	-	exon	ENSSSCG00000009568,
chr11	675689	676545	+	exon	ENSSSCG00000021814,
chr11	675689	683082	+	exon	ENSSSCG00000021814,
chr11	675689	686516	+	exon	ENSSSCG00000021814,
chr11	675689	700356	+	exon	ENSSSCG00000021814,
chr11	675689	694132	+	exon	ENSSSCG00000021814,
chr11	713800	714610	+	exon	ENSSSCG00000021814,
chr11	961507	983324	+	exon	ENSSSCG00000009270,
chr11	962794	964414	+	exon	ENSSSCG00000009270,
chr11	1004167	1009902	+	exon	ENSSSCG00000009270,
chr11	1120102	1141776	-	exon	ENSSSCG00000009276,
chr11	1141224	1141776	-	exon	ENSSSCG00000009276,
chr11	1141224	1163643	-	intron	ENSSSCG00000009276,
chr11	1341589	1364698	-	exon	ENSSSCG00000026744,
chr11	1341589	1371291	-	exon	ENSSSCG00000026744,
chr11	1341589	1376231	-	exon	ENSSSCG00000026744,
chr11	1355228	1371291	-	exon	ENSSSCG00000026744,
chr11	1355228	1376231	-	exon	ENSSSCG00000026744,
chr11	1355228	1357682	-	exon	ENSSSCG00000026744,
chr11	1364578	1371291	-	exon	ENSSSCG00000026744,
chr11	1364578	1376231	-	exon	ENSSSCG00000026744,
chr11	1455412	1463356	-	exon	ENSSSCG00000024667,
chr11	2737291	2741033	-	exon	ENSSSCG00000009290,
chr11	2848788	2851028	-	exon	ENSSSCG00000009293,
chr11	3193839	3199769	-	exon	ENSSSCG00000035119,
chr11	3193839	3208876	-	exon	ENSSSCG00000035119,
chr11	3208399	3208876	-	exon	ENSSSCG00000035119,
chr11	4104218	4118265	+	exon	ENSSSCG00000009298,
chr11	4104218	4143040	+	exon	ENSSSCG00000009298,
chr11	4140485	4158317	+	exon	ENSSSCG00000009298,
chr11	4152752	4158317	+	exon	ENSSSCG00000009298,
chr11	4299483	4345913	+	intergenic_region	n/a
chr11	4338231	4345913	+	exon	ENSSSCG00000009300,
chr11	4615097	4630378	-	exon	ENSSSCG00000009302,
chr11	4620688	4652306	-	exon	ENSSSCG00000009302,
chr11	4627965	4630378	-	exon	ENSSSCG00000009302,
chr11	4639811	4652306	-	exon	ENSSSCG00000009302,
chr11	5503065	5507316	+	exon	ENSSSCG00000009319,
chr11	5503065	5524214	+	exon	ENSSSCG00000009319,
chr11	5503065	5546751	+	exon	ENSSSCG00000009319,
chr11	5503065	5566038	+	intron	ENSSSCG00000009319,
chr11	5524053	5581004	+	exon	ENSSSCG00000009319,
chr11	5546604	5581004	+	exon	ENSSSCG00000009319,
chr11	5577247	5581004	+	exon	ENSSSCG00000009319,
chr11	5577247	5602241	+	exon	ENSSSCG00000009319,
chr11	5577247	5593953	+	exon	ENSSSCG00000009319,
chr11	5577247	5588249	+	exon	ENSSSCG00000009319,
chr11	5587551	5602241	+	exon	ENSSSCG00000009319,
chr11	5587551	5608636	+	exon	ENSSSCG00000009319,
chr11	5587551	5593953	+	exon	ENSSSCG00000009319,
chr11	5587551	5611641	+	exon	ENSSSCG00000009319,
chr11	5587554	5593953	+	exon	ENSSSCG00000009319,
chr11	5587554	5602241	+	exon	ENSSSCG00000009319,
chr11	5766388	5767129	-	exon	ENSSSCG00000009320,
chr11	6556534	6560872	-	exon	ENSSSCG00000029456,
chr11	7842819	7855987	+	exon	ENSSSCG00000009335,
chr11	8663835	8679624	+	exon	ENSSSCG00000009338,
chr11	8939631	8941243	-	intron	ENSSSCG00000009341,
chr11	8974451	8982801	-	exon	ENSSSCG00000009341,
chr11	9132180	9170916	+	exon	ENSSSCG00000009345,
chr11	9132180	9149581	+	exon	ENSSSCG00000009345,
chr11	9145564	9170916	+	exon	ENSSSCG00000009345,
chr11	9145564	9149581	+	exon	ENSSSCG00000009345,
chr11	9166634	9170916	+	exon	ENSSSCG00000009345,
chr11	9555517	9579851	-	exon	ENSSSCG00000009348,
chr11	9576209	9579851	-	exon	ENSSSCG00000009348,
chr11	9814623	9895238	-	intergenic_region	n/a
chr11	9823183	9895238	-	intergenic_region	n/a
chr11	9894098	9895238	-	intergenic_region	n/a
chr11	10884413	11001848	-	intergenic_region	n/a
chr11	10984951	11001848	-	intergenic_region	n/a
chr11	11156485	11209651	+	exon	ENSSSCG00000034348,
chr11	11156485	11181394	+	exon	ENSSSCG00000034348,
chr11	11160922	11181394	+	exon	ENSSSCG00000034348,
chr11	11248377	11266949	+	exon	ENSSSCG00000034348,
chr11	11357830	11359695	-	intron	ENSSSCG00000034348,
chr11	12828703	12838685	-	exon	ENSSSCG00000009359,
chr11	12843297	12862293	-	exon	ENSSSCG00000009359,
chr11	12858353	12862293	-	exon	ENSSSCG00000009359,
chr11	13330903	13349742	-	exon	ENSSSCG00000009362,
chr11	13775004	13776697	+	intergenic_region	n/a
chr11	14592748	14629935	+	exon	ENSSSCG00000009369,
chr11	15318722	15319196	-	intergenic_region	n/a
chr11	15709103	15712263	-	exon	ENSSSCG00000035658,
chr11	15719260	15726712	-	exon	ENSSSCG00000035658,
chr11	15779641	15783242	+	exon	ENSSSCG00000009379,
chr11	15829857	15840297	+	exon	ENSSSCG00000009380,
chr11	15917062	15919126	+	exon	ENSSSCG00000033677,
chr11	16094634	16116109	-	exon	ENSSSCG00000040538,
chr11	16102713	16116109	-	exon	ENSSSCG00000040538,
chr11	18256532	18269376	-	exon	ENSSSCG00000009395,
chr11	18313796	18315297	+	intergenic_region	n/a
chr11	18350469	18361632	+	exon	ENSSSCG00000009397,
chr11	18350469	18355949	+	exon	ENSSSCG00000009397,
chr11	18378998	18387865	+	exon	ENSSSCG00000009397,
chr11	18600238	18613216	-	exon	ENSSSCG00000022159,
chr11	18607625	18613216	-	exon	ENSSSCG00000022159,
chr11	18714362	18715144	-	intron	ENSSSCG00000022159,
chr11	19129663	19134837	+	intron	ENSSSCG00000009400,
chr11	19129679	19151418	+	intron	ENSSSCG00000009400,
chr11	19129679	19134837	+	intron	ENSSSCG00000009400,
chr11	19253377	19274010	-	exon	ENSSSCG00000009401,
chr11	19253377	19264448	-	exon	ENSSSCG00000009401,
chr11	19256521	19274010	-	exon	ENSSSCG00000009401,
chr11	19260010	19274010	-	exon	ENSSSCG00000009401,
chr11	19269925	19281642	-	exon	ENSSSCG00000009401,
chr11	19349681	19356078	-	exon	ENSSSCG00000009403,
chr11	19352012	19356078	-	exon	ENSSSCG00000009403,
chr11	19577828	19578023	-	exon	ENSSSCG00000027551,
chr11	20710449	20719541	-	exon	ENSSSCG00000009408,
chr11	20713782	20742474	-	exon	ENSSSCG00000009408,
chr11	20713782	20719541	-	exon	ENSSSCG00000009408,
chr11	20767276	20804630	-	exon	ENSSSCG00000009408,
chr11	20781784	20804630	-	exon	ENSSSCG00000009408,
chr11	21020402	21022536	+	exon	ENSSSCG00000009410,
chr11	21786478	21789563	-	exon	ENSSSCG00000023738,
chr11	21786478	21793730	-	exon	ENSSSCG00000023738,
chr11	21789455	21805764	-	exon	ENSSSCG00000023738,
chr11	21791604	21805764	-	exon	ENSSSCG00000023738,
chr11	21797314	21805764	-	exon	ENSSSCG00000023738,
chr11	21804834	21808388	-	exon	ENSSSCG00000023738,
chr11	21804834	21808357	-	exon	ENSSSCG00000023738,
chr11	21804834	21813745	-	exon	ENSSSCG00000023738,
chr11	21807483	21813745	-	exon	ENSSSCG00000023738,
chr11	21857828	21860927	-	exon	ENSSSCG00000023738,
chr11	22116588	22128793	-	exon	ENSSSCG00000034156,
chr11	22249417	22255527	-	exon	ENSSSCG00000009419,
chr11	22249417	22250409	-	exon	ENSSSCG00000009419,
chr11	22270782	22288235	+	exon	ENSSSCG00000009420,
chr11	22273966	22284695	+	exon	ENSSSCG00000009420,
chr11	22284603	22288235	+	exon	ENSSSCG00000009420,
chr11	24138266	24156655	+	exon	ENSSSCG00000037572,
chr11	24138266	24188050	+	exon	ENSSSCG00000037572,
chr11	24138266	24146998	+	exon	ENSSSCG00000037572,
chr11	24156582	24188050	+	exon	ENSSSCG00000037572,
chr11	24725031	24739289	-	exon	ENSSSCG00000009430,
chr11	24729025	24739289	-	exon	ENSSSCG00000009430,
chr11	24732398	24739289	-	exon	ENSSSCG00000009430,
chr11	24857303	24858237	-	exon	ENSSSCG00000009431,
chr11	25081807	25107399	+	exon	ENSSSCG00000029837,
chr11	25196950	25240454	+	exon	ENSSSCG00000029837,
chr11	25318969	25343890	+	exon	ENSSSCG00000029837,
chr11	25318969	25321570	+	exon	ENSSSCG00000029837,
chr11	25541019	25541852	-	exon	ENSSSCG00000009435,
chr11	25563087	25589582	-	exon	ENSSSCG00000009435,
chr11	25573447	25584052	-	exon	ENSSSCG00000009435,
chr11	25578332	25589582	-	exon	ENSSSCG00000009435,
chr11	25749779	25761445	-	exon	ENSSSCG00000031627,
chr11	25755742	25761445	-	exon	ENSSSCG00000031627,
chr11	25838073	25863874	+	exon	ENSSSCG00000009440,
chr11	25863694	25876559	+	exon	ENSSSCG00000009440,
chr11	30548837	30549202	+	exon	ENSSSCG00000009446,
chr11	33313986	33336182	+	exon	ENSSSCG00000009449,
chr11	33391961	33392814	+	exon	ENSSSCG00000009449,
chr11	43876951	43893930	-	exon	ENSSSCG00000009457,
chr11	43952890	44004314	-	exon	ENSSSCG00000009457,
chr11	45285952	45312443	+	exon	ENSSSCG00000024722,
chr11	47594177	47605644	-	exon	ENSSSCG00000009464,
chr11	47845080	47851849	+	exon	ENSSSCG00000009466,
chr11	47849408	47851849	+	exon	ENSSSCG00000009466,
chr11	47849408	47884140	+	exon	ENSSSCG00000009466,
chr11	49203468	49210487	-	exon	ENSSSCG00000009473,
chr11	49242751	49289022	-	exon	ENSSSCG00000009473,
chr11	49250535	49253425	-	exon	ENSSSCG00000009473,
chr11	49262112	49263275	-	exon	ENSSSCG00000009473,
chr11	49336609	49353419	-	exon	ENSSSCG00000009473,
chr11	49514752	49523802	-	intergenic_region	n/a
chr11	50762124	50773425	-	intron	ENSSSCG00000029113,
chr11	50762620	50773425	-	exon	ENSSSCG00000029113,
chr11	50762620	50770811	-	exon	ENSSSCG00000029113,
chr11	51531489	51534900	+	exon	ENSSSCG00000009480,
chr11	51531489	51540684	+	exon	ENSSSCG00000009480,
chr11	51531489	51531654	+	exon	ENSSSCG00000009480,
chr11	51531489	51547197	+	exon	ENSSSCG00000009480,
chr11	51531489	51554792	+	exon	ENSSSCG00000009480,
chr11	51531489	51551593	+	exon	ENSSSCG00000009480,
chr11	63621510	63625321	-	exon	ENSSSCG00000009490,
chr11	65256158	65286894	+	exon	ENSSSCG00000026082,
chr11	66535744	66536519	+	exon	ENSSSCG00000009505,
chr11	67200730	67217022	+	exon	ENSSSCG00000026863,
chr11	67216829	67217022	+	exon	ENSSSCG00000026863,
chr11	67216829	67227374	+	intron	ENSSSCG00000026863,
chr11	67409533	67411878	+	exon	ENSSSCG00000026863,
chr11	67477011	67524738	-	exon	ENSSSCG00000009511,
chr11	68173040	68181097	+	exon	ENSSSCG00000009516,
chr11	68431679	68454998	+	exon	ENSSSCG00000031808,
chr11	68458898	68463198	+	exon	ENSSSCG00000031808,
chr11	68934898	68943733	+	exon	ENSSSCG00000009522,
chr11	69097872	69131726	+	exon	ENSSSCG00000009522,
chr11	69296945	69300981	+	exon	ENSSSCG00000009522,
chr11	69754237	69794145	-	exon	ENSSSCG00000038949,
chr11	69776125	69794145	-	exon	ENSSSCG00000038949,
chr11	69776125	69837179	-	exon	ENSSSCG00000038949,
chr11	69792527	69794145	-	exon	ENSSSCG00000038949,
chr11	69792527	69837179	-	exon	ENSSSCG00000038949,
chr11	69982436	69984549	-	exon	ENSSSCG00000038949,
chr11	69998310	70001752	-	exon	ENSSSCG00000038949,
chr11	71125629	71135931	+	exon	ENSSSCG00000009534,
chr11	74209709	74209992	-	exon	ENSSSCG00000009535,
chr11	74256035	74258629	-	exon	ENSSSCG00000009536,
chr11	77475172	77489240	+	exon	ENSSSCG00000009551,
chr11	77475172	77478573	+	exon	ENSSSCG00000009551,
chr11	77498616	77503607	+	exon	ENSSSCG00000009551,
chr11	77514922	77517517	+	exon	ENSSSCG00000009551,
chr11	78343010	78351465	+	intergenic_region	n/a
chr11	78343010	78352808	+	intergenic_region	n/a
chr11	78349882	78352808	+	exon	ENSSSCG00000037561,
chr11	78349882	78356609	+	exon	ENSSSCG00000037561,
chr11	78351385	78356609	+	exon	ENSSSCG00000037561,
chr11	78356481	78385988	+	exon	ENSSSCG00000037561,
chr11	78382356	78383968	+	exon	ENSSSCG00000037561,
chr11	78543049	78543369	-	exon	ENSSSCG00000009557,
chr11	78756445	78765451	+	exon	ENSSSCG00000009560,
chr12	291763	294687	+	exon	ENSSSCG00000027229,
chr12	413917	422053	-	exon	ENSSSCG00000017136,
chr12	413917	435701	-	exon	ENSSSCG00000017136,
chr12	573171	585916	-	exon	ENSSSCG00000017125,
chr12	573171	575827	-	exon	ENSSSCG00000017125,
chr12	580548	585916	-	exon	ENSSSCG00000017125,
chr12	1255356	1259750	+	exon	ENSSSCG00000024235,
chr12	1492107	1494267	+	exon	ENSSSCG00000022317,
chr12	1492111	1494267	+	exon	ENSSSCG00000022317,
chr12	1804301	1853441	-	exon	ENSSSCG00000017139,
chr12	1804301	1922863	-	exon	ENSSSCG00000017139,
chr12	1804301	1923073	-	intron	ENSSSCG00000017139,
chr12	1838275	1853441	-	exon	ENSSSCG00000017139,
chr12	1910376	1923073	-	intron	ENSSSCG00000017139,
chr12	2288303	2292225	+	exon	ENSSSCG00000017155,
chr12	2288303	2289004	+	exon	ENSSSCG00000017155,
chr12	2290536	2291802	+	exon	ENSSSCG00000017155,
chr12	2306701	2308584	+	exon	ENSSSCG00000017155,
chr12	4379524	4389995	-	intergenic_region	n/a
chr12	5159731	5163734	+	exon	ENSSSCG00000017184,
chr12	5471981	5473179	+	exon	ENSSSCG00000017198,
chr12	5471981	5474791	+	exon	ENSSSCG00000017198,
chr12	5700622	5703194	-	exon	ENSSSCG00000017205,
chr12	5736153	5737335	+	exon	ENSSSCG00000023978,
chr12	6073486	6074110	-	exon	ENSSSCG00000017207,
chr12	6097638	6101624	-	exon	ENSSSCG00000017207,
chr12	6460664	6462407	+	exon	ENSSSCG00000017231,
chr12	11205936	11367122	+	intergenic_region	n/a
chr12	11253178	11268222	+	exon	ENSSSCG00000017256,
chr12	11253178	11266696	+	exon	ENSSSCG00000017256,
chr12	11350266	11439932	+	intergenic_region	n/a
chr12	11669306	11671052	-	exon	ENSSSCG00000017259,
chr12	11669306	11672541	-	exon	ENSSSCG00000017259,
chr12	11721129	11723627	+	exon	ENSSSCG00000017260,
chr12	12704689	12715789	-	exon	ENSSSCG00000023992,
chr12	12736751	12757927	-	exon	ENSSSCG00000023992,
chr12	12768443	12771332	-	exon	ENSSSCG00000023992,
chr12	13501057	13501309	-	exon	ENSSSCG00000017272,
chr12	14049645	14052979	+	exon	ENSSSCG00000017275,
chr12	14178158	14185034	+	exon	ENSSSCG00000033528,
chr12	14207097	14208324	+	exon	ENSSSCG00000033528,
chr12	14216841	14218889	+	exon	ENSSSCG00000033528,
chr12	14430775	14448031	+	exon	ENSSSCG00000032176,
chr12	14458188	14461336	+	exon	ENSSSCG00000032176,
chr12	14533441	14538259	-	exon	ENSSSCG00000028925,
chr12	14697840	14708065	+	exon	ENSSSCG00000017277,
chr12	14697840	14717665	+	exon	ENSSSCG00000017277,
chr12	15263850	15276048	-	exon	ENSSSCG00000024813,
chr12	15263850	15269630	-	exon	ENSSSCG00000024813,
chr12	15269531	15288986	-	exon	ENSSSCG00000024813,
chr12	15276008	15288986	-	exon	ENSSSCG00000024813,
chr12	15287153	15288986	-	exon	ENSSSCG00000024813,
chr12	15332194	15333657	-	exon	ENSSSCG00000017294,
chr12	16134048	16174077	-	exon	ENSSSCG00000017301,
chr12	16140336	16174077	-	exon	ENSSSCG00000017301,
chr12	16145896	16174077	-	exon	ENSSSCG00000017301,
chr12	16156838	16181569	-	exon	ENSSSCG00000017301,
chr12	16158876	16174077	-	exon	ENSSSCG00000017301,
chr12	16172826	16181569	-	exon	ENSSSCG00000017301,
chr12	16172826	16195799	-	exon	ENSSSCG00000017301,
chr12	16195632	16211961	-	exon	ENSSSCG00000017301,
chr12	16209070	16211961	-	exon	ENSSSCG00000017301,
chr12	16822210	16829262	+	exon	ENSSSCG00000017308,
chr12	16822210	16844840	+	exon	ENSSSCG00000017308,
chr12	16852933	16855070	+	exon	ENSSSCG00000017308,
chr12	16876268	16877851	+	exon	ENSSSCG00000017308,
chr12	16953323	16954694	+	exon	ENSSSCG00000017310,
chr12	17044270	17060678	+	exon	ENSSSCG00000017310,
chr12	18321661	18326321	-	exon	ENSSSCG00000017339,
chr12	18487310	18492129	+	exon	ENSSSCG00000017346,
chr12	18487310	18497749	+	exon	ENSSSCG00000017346,
chr12	18492047	18497749	+	exon	ENSSSCG00000017346,
chr12	18552929	18555766	+	exon	ENSSSCG00000021306,
chr12	18820583	18832945	+	exon	ENSSSCG00000017357,
chr12	19572244	19573449	-	exon	ENSSSCG00000017378,
chr12	19760214	19773891	-	exon	ENSSSCG00000030211,
chr12	19761721	19763707	-	exon	ENSSSCG00000030211,
chr12	19765318	19768678	-	exon	ENSSSCG00000030211,
chr12	20118352	20123255	+	intergenic_region	n/a
chr12	20126112	20136260	+	exon	ENSSSCG00000017382,
chr12	20126112	20129339	+	exon	ENSSSCG00000017382,
chr12	20133518	20136260	+	intron	ENSSSCG00000017382,
chr12	20133518	20134694	+	intron	ENSSSCG00000017382,
chr12	20311475	20313397	-	exon	ENSSSCG00000017401,
chr12	20557579	20557867	+	exon	ENSSSCG00000017406,
chr12	20557579	20558813	+	exon	ENSSSCG00000017406,
chr12	21027981	21077943	+	exon	ENSSSCG00000017448,
chr12	21118219	21141475	+	intergenic_region	n/a
chr12	21537661	21540429	+	exon	ENSSSCG00000024067,
chr12	22484643	22487384	+	intron	ENSSSCG00000017494,
chr12	22606823	22607386	-	exon	ENSSSCG00000017497,
chr12	22811222	22813863	-	exon	ENSSSCG00000017504,
chr12	22812395	22813863	-	exon	ENSSSCG00000017504,
chr12	22854805	22856035	+	exon	ENSSSCG00000017505,
chr12	22917702	22940720	+	exon	ENSSSCG00000017506,
chr12	22940646	22948639	+	exon	ENSSSCG00000017506,
chr12	22950819	22953012	+	exon	ENSSSCG00000017506,
chr12	23015631	23015995	+	exon	ENSSSCG00000017508,
chr12	23240963	23249145	-	exon	ENSSSCG00000040642,
chr12	23704145	23714352	-	exon	ENSSSCG00000018057,
chr12	23857979	23880588	+	exon	ENSSSCG00000017513,
chr12	23859739	23874195	+	exon	ENSSSCG00000017513,
chr12	23866934	23874195	+	exon	ENSSSCG00000017513,
chr12	23880446	23882018	+	exon	ENSSSCG00000017513,
chr12	23880446	23887038	+	exon	ENSSSCG00000017513,
chr12	24327241	24328063	-	exon	ENSSSCG00000017529,
chr12	25066506	25069215	+	exon	ENSSSCG00000017543,
chr12	25070711	25071215	+	exon	ENSSSCG00000017543,
chr12	26243872	26244391	+	exon	ENSSSCG00000017578,
chr12	26992941	26993395	+	intron	ENSSSCG00000038760,
chr12	27243217	27252923	-	exon	ENSSSCG00000033228,
chr12	27243217	27245436	-	exon	ENSSSCG00000033228,
chr12	27249779	27252923	-	exon	ENSSSCG00000033228,
chr12	27249779	27250993	-	exon	ENSSSCG00000033228,
chr12	27268443	27275982	-	exon	ENSSSCG00000033228,
chr12	27274748	27275982	-	exon	ENSSSCG00000033228,
chr12	27298750	27312593	-	exon	ENSSSCG00000033228,
chr12	27490741	27499620	-	exon	ENSSSCG00000017592,
chr12	27531355	27538247	+	exon	ENSSSCG00000017593,
chr12	31220402	31221947	+	exon	ENSSSCG00000017601,
chr12	31358562	31388511	+	exon	ENSSSCG00000017602,
chr12	31634176	31639609	+	exon	ENSSSCG00000017604,
chr12	32060088	32067455	+	exon	ENSSSCG00000017608,
chr12	33289729	33290715	+	exon	ENSSSCG00000017617,
chr12	34720966	34737818	-	exon	ENSSSCG00000017641,
chr12	34980903	35008491	+	exon	ENSSSCG00000023955,
chr12	34998808	35008491	+	exon	ENSSSCG00000023955,
chr12	35297852	35325792	-	exon	ENSSSCG00000023727,
chr12	35345176	35356574	-	exon	ENSSSCG00000023727,
chr12	35345176	35361801	-	exon	ENSSSCG00000023727,
chr12	35369433	35381060	-	exon	ENSSSCG00000023727,
chr12	35597421	35597734	+	exon	ENSSSCG00000035400,
chr12	35991800	35999542	+	exon	ENSSSCG00000017668,
chr12	36083086	36105578	-	exon	ENSSSCG00000017669,
chr12	36123743	36126760	+	exon	ENSSSCG00000017670,
chr12	36123743	36154292	+	exon	ENSSSCG00000017670,
chr12	36123743	36150375	+	exon	ENSSSCG00000017670,
chr12	36144955	36154292	+	exon	ENSSSCG00000017670,
chr12	36150268	36154292	+	exon	ENSSSCG00000017670,
chr12	36167409	36170928	-	exon	ENSSSCG00000017671,
chr12	36362691	36385530	+	exon	ENSSSCG00000017672,
chr12	36372064	36372744	+	exon	ENSSSCG00000017672,
chr12	36404219	36411422	+	exon	ENSSSCG00000017672,
chr12	36543485	36559262	+	exon	ENSSSCG00000021384,
chr12	37178174	37219284	-	exon	ENSSSCG00000017676,
chr12	37178174	37242733	-	exon	ENSSSCG00000017676,
chr12	37496922	37517080	-	exon	ENSSSCG00000026665,
chr12	37509450	37517080	-	exon	ENSSSCG00000026665,
chr12	37636936	37641401	+	exon	ENSSSCG00000017678,
chr12	37934747	37940574	+	exon	ENSSSCG00000039473,
chr12	38083733	38093378	+	exon	ENSSSCG00000017688,
chr12	38083733	38122598	+	intergenic_region	n/a
chr12	38085680	38093378	+	exon	ENSSSCG00000017688,
chr12	38103106	38109151	+	exon	ENSSSCG00000017688,
chr12	38501975	38506507	+	exon	ENSSSCG00000017693,
chr12	38585525	38741293	-	exon	ENSSSCG00000017694,
chr12	38585525	38716290	-	exon	ENSSSCG00000017694,
chr12	38585525	38698505	-	exon	ENSSSCG00000017694,
chr12	38591577	38592526	-	exon	ENSSSCG00000017694,
chr12	38642701	38698505	-	exon	ENSSSCG00000017694,
chr12	38678062	38680726	-	exon	ENSSSCG00000017694,
chr12	38691032	38716290	-	exon	ENSSSCG00000017694,
chr12	38696478	38716290	-	exon	ENSSSCG00000017694,
chr12	38711800	38716290	-	exon	ENSSSCG00000017694,
chr12	38729382	38750304	-	exon	ENSSSCG00000017694,
chr12	38750095	38765156	-	exon	ENSSSCG00000017694,
chr12	38756297	38765156	-	exon	ENSSSCG00000017694,
chr12	38760072	38765156	-	exon	ENSSSCG00000017694,
chr12	38796303	38800438	-	exon	ENSSSCG00000017694,
chr12	38899026	38914134	+	exon	ENSSSCG00000025775,
chr12	39030853	39037930	-	exon	ENSSSCG00000026596,
chr12	39036725	39039068	-	exon	ENSSSCG00000026596,
chr12	39036725	39037930	-	exon	ENSSSCG00000026596,
chr12	39310277	39311632	-	exon	ENSSSCG00000038478,
chr12	39408156	39428231	-	intergenic_region	n/a
chr12	39411092	39425513	-	intergenic_region	n/a
chr12	39416686	39428225	-	intergenic_region	n/a
chr12	39416686	39428231	-	intergenic_region	n/a
chr12	39419806	39428231	-	intergenic_region	n/a
chr12	39425412	39428231	-	intergenic_region	n/a
chr12	39714543	39714949	-	exon	ENSSSCG00000017707,
chr12	39714543	39716761	-	exon	ENSSSCG00000017707,
chr12	39886339	39890043	-	exon	ENSSSCG00000017712,
chr12	39986359	39988967	+	intergenic_region	n/a
chr12	42242539	42275790	+	exon	ENSSSCG00000017728,
chr12	42246347	42275790	+	exon	ENSSSCG00000017728,
chr12	42582814	42596350	-	exon	ENSSSCG00000017732,
chr12	42587230	42596350	-	exon	ENSSSCG00000017732,
chr12	42587230	42590132	-	exon	ENSSSCG00000017732,
chr12	42589975	42596350	-	exon	ENSSSCG00000017732,
chr12	42592878	42596350	-	exon	ENSSSCG00000017732,
chr12	42741473	42758003	-	exon	ENSSSCG00000017735,
chr12	42750233	42762928	-	exon	ENSSSCG00000017735,
chr12	42750233	42758003	-	exon	ENSSSCG00000017735,
chr12	42750233	42758865	-	exon	ENSSSCG00000017735,
chr12	42757754	42762928	-	exon	ENSSSCG00000017735,
chr12	42888795	42889190	-	exon	ENSSSCG00000035954,
chr12	43006733	43029509	-	exon	ENSSSCG00000017744,
chr12	43013261	43029509	-	exon	ENSSSCG00000017744,
chr12	43070860	43073836	+	exon	ENSSSCG00000017745,
chr12	43096806	43097800	+	exon	ENSSSCG00000017745,
chr12	43344730	43344939	-	intergenic_region	n/a
chr12	43595390	43598007	-	exon	ENSSSCG00000017748,
chr12	43650050	43677207	-	exon	ENSSSCG00000017748,
chr12	43673069	43691261	-	exon	ENSSSCG00000017748,
chr12	43684482	43691261	-	exon	ENSSSCG00000017748,
chr12	43892243	43899845	+	exon	ENSSSCG00000017752,
chr12	45141703	45145458	-	exon	ENSSSCG00000017779,
chr12	45688138	45690878	+	exon	ENSSSCG00000017790,
chr12	45688138	45733886	+	exon	ENSSSCG00000017790,
chr12	45694158	45710855	+	exon	ENSSSCG00000017790,
chr12	45694158	45712669	+	exon	ENSSSCG00000017790,
chr12	45724053	45733886	+	exon	ENSSSCG00000017790,
chr12	45856452	45887992	-	exon	ENSSSCG00000017791,
chr12	45870808	45887992	-	exon	ENSSSCG00000017791,
chr12	46260301	46267356	+	exon	ENSSSCG00000017795,
chr12	46277587	46294524	+	intergenic_region	n/a
chr12	46493252	46501651	+	exon	ENSSSCG00000017799,
chr12	46544115	46560929	+	exon	ENSSSCG00000029262,
chr12	47237445	47249859	+	exon	ENSSSCG00000017812,
chr12	47400191	47409801	+	exon	ENSSSCG00000036705,
chr12	48015122	48022505	+	exon	ENSSSCG00000017822,
chr12	48377612	48381478	-	exon	ENSSSCG00000017826,
chr12	48503094	48503900	-	exon	ENSSSCG00000017832,
chr12	48532439	48543642	-	exon	ENSSSCG00000017832,
chr12	48687199	48712536	+	exon	ENSSSCG00000017836,
chr12	48687199	48687418	+	exon	ENSSSCG00000017836,
chr12	49912798	49916345	-	exon	ENSSSCG00000017870,
chr12	50206420	50213931	-	exon	ENSSSCG00000017877,
chr12	50206420	50226240	-	exon	ENSSSCG00000017877,
chr12	50266696	50282622	-	exon	ENSSSCG00000017878,
chr12	51619119	51629888	-	exon	ENSSSCG00000017895,
chr12	51625930	51636844	-	exon	ENSSSCG00000017895,
chr12	51636713	51658146	-	exon	ENSSSCG00000017895,
chr12	51636713	51680596	-	exon	ENSSSCG00000017895,
chr12	51640771	51680596	-	exon	ENSSSCG00000017895,
chr12	53612425	53633146	+	exon	ENSSSCG00000017986,
chr12	53615200	53633146	+	exon	ENSSSCG00000017986,
chr12	53659416	53661048	-	intergenic_region	n/a
chr12	54477951	54492240	-	exon	ENSSSCG00000034964,
chr12	54592899	54600414	+	exon	ENSSSCG00000017995,
chr12	55266901	55360449	-	intergenic_region	n/a
chr12	55270376	55362835	-	intergenic_region	n/a
chr12	55430702	55432293	+	exon	ENSSSCG00000018009,
chr12	55430702	55432289	+	exon	ENSSSCG00000018009,
chr12	55430883	55432293	+	exon	ENSSSCG00000018009,
chr12	56438413	56473522	+	exon	ENSSSCG00000018016,
chr12	59273100	59308104	+	intergenic_region	n/a
chr12	59273100	59323398	+	intergenic_region	n/a
chr12	59273100	59296987	+	intergenic_region	n/a
chr12	59273100	59283672	+	intergenic_region	n/a
chr12	59273100	59338842	+	intergenic_region	n/a
chr12	59313685	59338842	+	exon	ENSSSCG00000018039,
chr12	59319172	59323398	+	exon	ENSSSCG00000018039,
chr12	59319172	59331703	+	exon	ENSSSCG00000018039,
chr12	59319172	59338842	+	exon	ENSSSCG00000018039,
chr12	59320434	59323398	+	exon	ENSSSCG00000018039,
chr12	59320434	59331703	+	exon	ENSSSCG00000018039,
chr12	59351567	59353890	+	exon	ENSSSCG00000018039,
chr12	59351567	59360421	+	exon	ENSSSCG00000018039,
chr12	59541641	59546736	-	exon	ENSSSCG00000034364,
chr12	59740751	59748725	+	exon	ENSSSCG00000024030,
chr12	59744649	59758151	+	exon	ENSSSCG00000024030,
chr12	59744649	59748725	+	exon	ENSSSCG00000024030,
chr12	59744649	59777382	+	exon	ENSSSCG00000024030,
chr12	59819971	59822490	+	intron	ENSSSCG00000018045,
chr12	59821853	59822490	+	exon	ENSSSCG00000018045,
chr12	59821853	59839936	+	exon	ENSSSCG00000018045,
chr12	59821853	59828925	+	exon	ENSSSCG00000018045,
chr12	59821853	59846613	+	exon	ENSSSCG00000018045,
chr12	59827745	59839936	+	exon	ENSSSCG00000018045,
chr12	59827745	59846613	+	exon	ENSSSCG00000018045,
chr12	59925864	59926124	-	intron	ENSSSCG00000018042,
chr12	60012086	60017666	+	intron	ENSSSCG00000018046,
chr12	60175882	60184718	-	exon	ENSSSCG00000040457,
chr12	60182783	60184718	-	exon	ENSSSCG00000040457,
chr12	60348042	60370222	-	exon	ENSSSCG00000018049,
chr12	60348042	60376920	-	exon	ENSSSCG00000018049,
chr12	60348042	60376568	-	exon	ENSSSCG00000018049,
chr12	60353452	60376920	-	exon	ENSSSCG00000018049,
chr12	60361138	60370222	-	exon	ENSSSCG00000018049,
chr12	60361138	60376568	-	exon	ENSSSCG00000018049,
chr12	60361138	60376920	-	exon	ENSSSCG00000018049,
chr12	60361138	60373400	-	exon	ENSSSCG00000018049,
chr12	60366858	60376920	-	exon	ENSSSCG00000018049,
chr12	60366858	60373400	-	exon	ENSSSCG00000018049,
chr12	60370050	60376920	-	exon	ENSSSCG00000018049,
chr12	60373334	60376920	-	exon	ENSSSCG00000018049,
chr12	60373334	60376568	-	exon	ENSSSCG00000018049,
chr12	60375325	60376920	-	exon	ENSSSCG00000018049,
chr12	60376419	60376920	-	exon	ENSSSCG00000018049,
chr12	60626545	60631580	+	exon	ENSSSCG00000028712,
chr12	60712844	60717153	+	exon	ENSSSCG00000038639,
chr13	1464115	1467192	-	exon	ENSSSCG00000011183,
chr13	1529653	1540269	-	exon	ENSSSCG00000011183,
chr13	1749896	1783327	+	exon	ENSSSCG00000029094,
chr13	2455229	2466993	+	exon	ENSSSCG00000030697,
chr13	2464744	2472398	+	exon	ENSSSCG00000030697,
chr13	2940058	2964480	-	exon	ENSSSCG00000011194,
chr13	3402199	3405113	+	exon	ENSSSCG00000011197,
chr13	3404652	3405113	+	exon	ENSSSCG00000011197,
chr13	4115487	4120836	+	exon	ENSSSCG00000029811,
chr13	4407150	4414280	-	exon	ENSSSCG00000011199,
chr13	4440583	4462661	-	exon	ENSSSCG00000011199,
chr13	4605251	4633312	-	intron	ENSSSCG00000011199,
chr13	6930900	6933794	+	exon	ENSSSCG00000037653,
chr13	10914515	10943848	-	exon	ENSSSCG00000036033,
chr13	10934458	10943848	-	exon	ENSSSCG00000036033,
chr13	11164591	11209734	-	exon	ENSSSCG00000036033,
chr13	12556296	12562830	-	intron	ENSSSCG00000011213,
chr13	12631992	12635895	-	exon	ENSSSCG00000011214,
chr13	12666411	12670563	-	exon	ENSSSCG00000011214,
chr13	14039094	14039275	+	intron	ENSSSCG00000011218,
chr13	16327037	16342479	+	exon	ENSSSCG00000036381,
chr13	16340101	16342479	+	exon	ENSSSCG00000036381,
chr13	16822443	16826413	+	exon	ENSSSCG00000011226,
chr13	17582876	17587193	+	exon	ENSSSCG00000011229,
chr13	17612080	17615052	+	exon	ENSSSCG00000011229,
chr13	18137303	18148480	+	exon	ENSSSCG00000021977,
chr13	18341600	18350091	+	exon	ENSSSCG00000022618,
chr13	18341600	18350103	+	exon	ENSSSCG00000022618,
chr13	18514274	18515323	-	exon	ENSSSCG00000011233,
chr13	18526605	18529971	-	exon	ENSSSCG00000011233,
chr13	18672578	18688121	+	exon	ENSSSCG00000032220,
chr13	18898335	18923106	-	exon	ENSSSCG00000024119,
chr13	19227601	19251022	-	exon	ENSSSCG00000011235,
chr13	19228140	19251022	-	exon	ENSSSCG00000011235,
chr13	19401276	19405826	-	exon	ENSSSCG00000011236,
chr13	19605022	19620366	+	exon	ENSSSCG00000011237,
chr13	21762720	21781212	+	exon	ENSSSCG00000027738,
chr13	21829652	21838494	-	exon	ENSSSCG00000024222,
chr13	22169320	22184693	+	exon	ENSSSCG00000011243,
chr13	22180260	22199462	+	exon	ENSSSCG00000011243,
chr13	22216776	22226182	+	exon	ENSSSCG00000011243,
chr13	22216776	22239729	+	exon	ENSSSCG00000011243,
chr13	22226107	22239729	+	exon	ENSSSCG00000011243,
chr13	23319029	23330244	+	intergenic_region	n/a
chr13	23774623	23781254	+	exon	ENSSSCG00000011261,
chr13	24074311	24075912	+	exon	ENSSSCG00000037236,
chr13	25342265	25398939	-	exon	ENSSSCG00000025408,
chr13	25391334	25398939	-	exon	ENSSSCG00000025408,
chr13	25705006	25715600	-	exon	ENSSSCG00000025408,
chr13	25706237	25715600	-	exon	ENSSSCG00000025408,
chr13	25708751	25715600	-	exon	ENSSSCG00000025408,
chr13	26086741	26109530	-	intergenic_region	n/a
chr13	26140519	26157219	+	exon	ENSSSCG00000011284,
chr13	26154789	26169083	+	exon	ENSSSCG00000011284,
chr13	26160701	26169083	+	exon	ENSSSCG00000011284,
chr13	26163497	26169083	+	exon	ENSSSCG00000011284,
chr13	26364791	26365617	+	intergenic_region	n/a
chr13	26682837	26686462	+	exon	ENSSSCG00000011295,
chr13	26892208	26899656	-	exon	ENSSSCG00000011296,
chr13	28283986	28292368	-	exon	ENSSSCG00000011298,
chr13	28842822	28854145	+	exon	ENSSSCG00000027176,
chr13	28871682	28873176	+	exon	ENSSSCG00000027176,
chr13	29426125	29428478	-	exon	ENSSSCG00000029879,
chr13	29428388	29431659	-	exon	ENSSSCG00000029879,
chr13	29439477	29439639	+	intron	ENSSSCG00000029879,
chr13	29489487	29504278	-	exon	ENSSSCG00000026945,
chr13	29894359	29925370	-	exon	ENSSSCG00000011332,
chr13	29898476	29925370	-	exon	ENSSSCG00000011332,
chr13	29898476	29960782	-	exon	ENSSSCG00000011332,
chr13	29901475	29916530	-	exon	ENSSSCG00000011332,
chr13	29901475	29925370	-	exon	ENSSSCG00000011332,
chr13	29915862	29925370	-	exon	ENSSSCG00000011332,
chr13	29915862	29916530	-	exon	ENSSSCG00000011332,
chr13	29915862	29960782	-	exon	ENSSSCG00000011332,
chr13	29921242	29925370	-	exon	ENSSSCG00000011332,
chr13	29941686	29960782	-	exon	ENSSSCG00000011332,
chr13	29953610	29960782	-	exon	ENSSSCG00000011332,
chr13	29956791	29960782	-	exon	ENSSSCG00000011332,
chr13	30110846	30113591	+	exon	ENSSSCG00000024513,
chr13	30263943	30266907	-	exon	ENSSSCG00000026281,
chr13	30263943	30297674	-	exon	ENSSSCG00000026281,
chr13	30424846	30473996	-	exon	ENSSSCG00000011340,
chr13	30431233	30473996	-	exon	ENSSSCG00000011340,
chr13	30431233	30458124	-	exon	ENSSSCG00000011340,
chr13	30431233	30472366	-	exon	ENSSSCG00000011340,
chr13	30445478	30458124	-	exon	ENSSSCG00000011340,
chr13	30445478	30547685	-	exon	ENSSSCG00000011340,
chr13	30445478	30472366	-	exon	ENSSSCG00000011340,
chr13	30445478	30564659	-	exon	ENSSSCG00000011340,
chr13	30472205	30564659	-	exon	ENSSSCG00000011340,
chr13	30495982	30507598	-	exon	ENSSSCG00000011340,
chr13	30498194	30512528	-	exon	ENSSSCG00000011340,
chr13	30512469	30547685	-	exon	ENSSSCG00000011340,
chr13	30516967	30547685	-	exon	ENSSSCG00000011340,
chr13	30516967	30564659	-	exon	ENSSSCG00000011340,
chr13	30516967	30524999	-	exon	ENSSSCG00000011340,
chr13	30516967	30555481	-	exon	ENSSSCG00000011340,
chr13	30522328	30524999	-	exon	ENSSSCG00000011340,
chr13	30524874	30547685	-	exon	ENSSSCG00000011340,
chr13	30524874	30564659	-	exon	ENSSSCG00000011340,
chr13	30538624	30564659	-	exon	ENSSSCG00000011340,
chr13	30538624	30547685	-	exon	ENSSSCG00000011340,
chr13	30538624	30555481	-	exon	ENSSSCG00000011340,
chr13	30544508	30547685	-	exon	ENSSSCG00000011340,
chr13	30544508	30555481	-	exon	ENSSSCG00000011340,
chr13	30544508	30564659	-	exon	ENSSSCG00000011340,
chr13	30678033	30681718	-	exon	ENSSSCG00000029251,
chr13	30679127	30681718	-	exon	ENSSSCG00000029251,
chr13	30729707	30744517	-	exon	ENSSSCG00000029251,
chr13	31062598	31063812	+	intergenic_region	n/a
chr13	31604187	31618173	+	exon	ENSSSCG00000011367,
chr13	31604187	31613159	+	exon	ENSSSCG00000011367,
chr13	31673546	31676127	-	exon	ENSSSCG00000011373,
chr13	31682729	31683772	-	exon	ENSSSCG00000011373,
chr13	31891050	31894444	-	exon	ENSSSCG00000011382,
chr13	31891050	31901336	-	exon	ENSSSCG00000011382,
chr13	31921131	31923831	-	exon	ENSSSCG00000022080,
chr13	31944076	31944355	-	intron	ENSSSCG00000022080,
chr13	32466924	32506478	+	exon	ENSSSCG00000011394,
chr13	32466924	32541480	+	exon	ENSSSCG00000011394,
chr13	32471562	32478114	+	intron	ENSSSCG00000011394,
chr13	32471840	32478114	+	exon	ENSSSCG00000011394,
chr13	32548617	32551325	+	exon	ENSSSCG00000011394,
chr13	32554728	32563493	+	exon	ENSSSCG00000011394,
chr13	32559768	32563493	+	exon	ENSSSCG00000011394,
chr13	32559768	32560025	+	exon	ENSSSCG00000011394,
chr13	32559768	32569679	+	exon	ENSSSCG00000011394,
chr13	32599621	32600419	+	exon	ENSSSCG00000011395,
chr13	32646156	32646313	+	exon	ENSSSCG00000011398,
chr13	32661825	32662162	+	intron	ENSSSCG00000011398,
chr13	33702777	33705323	-	intron	ENSSSCG00000011417,
chr13	33880624	33882569	+	exon	ENSSSCG00000011425,
chr13	33906817	33920126	+	exon	ENSSSCG00000011424,
chr13	34272026	34284862	-	exon	ENSSSCG00000011426,
chr13	34779561	34780761	-	exon	ENSSSCG00000035824,
chr13	34799994	34814973	-	exon	ENSSSCG00000035824,
chr13	34821896	34823051	+	intron	ENSSSCG00000011449,
chr13	34824030	34825924	+	exon	ENSSSCG00000011449,
chr13	34876368	34882541	-	exon	ENSSSCG00000011446,
chr13	34882055	34882541	-	exon	ENSSSCG00000011446,
chr13	35084780	35101407	-	exon	ENSSSCG00000011454,
chr13	38452833	38490204	+	exon	ENSSSCG00000021439,
chr13	38509184	38545830	-	exon	ENSSSCG00000024201,
chr13	38516027	38518464	-	exon	ENSSSCG00000024201,
chr13	38531389	38545830	-	exon	ENSSSCG00000024201,
chr13	38531389	38533670	-	exon	ENSSSCG00000024201,
chr13	38538687	38545830	-	exon	ENSSSCG00000024201,
chr13	38540108	38545830	-	exon	ENSSSCG00000024201,
chr13	38541875	38545830	-	exon	ENSSSCG00000024201,
chr13	38950278	38951861	-	exon	ENSSSCG00000011463,
chr13	39104468	39114331	+	exon	ENSSSCG00000032357,
chr13	39113642	39114076	+	intron	ENSSSCG00000032357,
chr13	39467515	39471302	-	exon	ENSSSCG00000011467,
chr13	39468507	39468774	-	exon	ENSSSCG00000011467,
chr13	39482886	39486529	-	exon	ENSSSCG00000011467,
chr13	39650184	39672339	+	exon	ENSSSCG00000038873,
chr13	39685541	39691486	+	exon	ENSSSCG00000038873,
chr13	39700743	39705649	+	exon	ENSSSCG00000038873,
chr13	39936098	39937154	-	exon	ENSSSCG00000011471,
chr13	43269740	43314110	+	intergenic_region	n/a
chr13	46152753	46164484	-	exon	ENSSSCG00000011496,
chr13	46159777	46164484	-	exon	ENSSSCG00000011496,
chr13	46987049	47002023	-	exon	ENSSSCG00000011497,
chr13	47760569	47764526	+	exon	ENSSSCG00000011498,
chr13	47933287	47945326	-	exon	ENSSSCG00000011499,
chr13	48930998	48960285	-	exon	ENSSSCG00000011501,
chr13	50403678	50411447	-	exon	ENSSSCG00000011504,
chr13	50409414	50410562	-	exon	ENSSSCG00000011504,
chr13	50410262	50421219	-	exon	ENSSSCG00000011504,
chr13	50468158	50474243	-	exon	ENSSSCG00000011510,
chr13	50643756	50651009	-	exon	ENSSSCG00000011511,
chr13	51386726	51401694	+	exon	ENSSSCG00000011514,
chr13	52433336	52446046	-	exon	ENSSSCG00000027675,
chr13	53090589	53106944	-	exon	ENSSSCG00000011516,
chr13	55751309	55761847	-	exon	ENSSSCG00000011522,
chr13	55995003	56000770	-	exon	ENSSSCG00000011522,
chr13	56972791	56994144	+	exon	ENSSSCG00000011524,
chr13	56992010	57007489	+	exon	ENSSSCG00000011524,
chr13	61018842	61022479	-	exon	ENSSSCG00000011532,
chr13	61681808	61687986	+	exon	ENSSSCG00000011535,
chr13	65086743	65138764	-	intergenic_region	n/a
chr13	65134093	65138764	-	exon	ENSSSCG00000021585,
chr13	65289860	65330679	-	exon	ENSSSCG00000026158,
chr13	65615096	65616634	-	intergenic_region	n/a
chr13	65723023	65724436	+	exon	ENSSSCG00000011542,
chr13	65723023	65737340	+	exon	ENSSSCG00000011542,
chr13	65815438	65824773	+	exon	ENSSSCG00000011540,
chr13	65815438	65830407	+	exon	ENSSSCG00000011540,
chr13	65823806	65830407	+	exon	ENSSSCG00000011540,
chr13	65957292	65967418	+	exon	ENSSSCG00000011546,
chr13	65964374	65967418	+	exon	ENSSSCG00000011546,
chr13	65983536	65993906	+	exon	ENSSSCG00000011546,
chr13	66114472	66116302	+	exon	ENSSSCG00000011553,
chr13	66228491	66231124	-	exon	ENSSSCG00000011562,
chr13	66493801	66495580	-	exon	ENSSSCG00000011572,
chr13	67934546	67951219	-	exon	ENSSSCG00000011578,
chr13	68383628	68394776	+	exon	ENSSSCG00000011579,
chr13	68595006	68611602	-	exon	ENSSSCG00000024453,
chr13	68599627	68611602	-	exon	ENSSSCG00000024453,
chr13	68611370	68611602	-	exon	ENSSSCG00000024453,
chr13	68820770	68821056	-	exon	ENSSSCG00000033303,
chr13	70364297	70372547	+	exon	ENSSSCG00000011602,
chr13	70364399	70370754	+	exon	ENSSSCG00000011602,
chr13	70406477	70408175	-	exon	ENSSSCG00000011603,
chr13	70778196	70779817	-	exon	ENSSSCG00000011609,
chr13	71325096	71330540	+	exon	ENSSSCG00000027812,
chr13	71406117	71407910	+	exon	ENSSSCG00000023354,
chr13	71709052	71712930	+	exon	ENSSSCG00000011616,
chr13	71794794	71797638	-	exon	ENSSSCG00000011615,
chr13	71794794	71811678	-	intron	ENSSSCG00000011615,
chr13	71897446	71897752	+	exon	ENSSSCG00000011612,
chr13	72116572	72118925	-	exon	ENSSSCG00000011619,
chr13	73237139	73245807	-	intron	ENSSSCG00000031557,
chr13	73237139	73239444	-	exon	ENSSSCG00000031557,
chr13	73291407	73303813	+	intergenic_region	n/a
chr13	73619280	73623731	+	exon	ENSSSCG00000011628,
chr13	73619280	73631399	+	exon	ENSSSCG00000011628,
chr13	73892522	73895711	-	exon	ENSSSCG00000011632,
chr13	74991933	74998162	+	exon	ENSSSCG00000011639,
chr13	75342684	75362989	-	exon	ENSSSCG00000011642,
chr13	75615215	75652667	+	exon	ENSSSCG00000011645,
chr13	75615215	75616395	+	exon	ENSSSCG00000011645,
chr13	75615215	75619031	+	intron	ENSSSCG00000011645,
chr13	75615215	75644335	+	exon	ENSSSCG00000011645,
chr13	75615215	75645292	+	exon	ENSSSCG00000011645,
chr13	75615215	75675474	+	exon	ENSSSCG00000011645,
chr13	77068767	77075075	+	exon	ENSSSCG00000033185,
chr13	77255800	77263360	+	exon	ENSSSCG00000011653,
chr13	77255800	77289518	+	exon	ENSSSCG00000011653,
chr13	77334366	77349444	-	exon	ENSSSCG00000011652,
chr13	77581955	77621218	-	exon	ENSSSCG00000011652,
chr13	79289326	79291240	+	exon	ENSSSCG00000027505,
chr13	79476250	79496843	-	exon	ENSSSCG00000021203,
chr13	79490411	79496843	-	exon	ENSSSCG00000021203,
chr13	82256891	82274534	+	exon	ENSSSCG00000011672,
chr13	82256891	82285635	+	exon	ENSSSCG00000011672,
chr13	82256891	82261474	+	exon	ENSSSCG00000011672,
chr13	82298834	82306675	+	exon	ENSSSCG00000011672,
chr13	82802690	82893436	-	exon	ENSSSCG00000037647,
chr13	82884596	82893436	-	exon	ENSSSCG00000037647,
chr13	82957452	82961056	-	exon	ENSSSCG00000011677,
chr13	82958286	82961056	-	exon	ENSSSCG00000011677,
chr13	82958286	82965072	-	intron	ENSSSCG00000011677,
chr13	82985993	82986473	-	exon	ENSSSCG00000011677,
chr13	83150017	83152060	-	exon	ENSSSCG00000011678,
chr13	83151533	83152060	-	exon	ENSSSCG00000011678,
chr13	83156797	83160799	-	exon	ENSSSCG00000011678,
chr13	83159181	83160799	-	exon	ENSSSCG00000011678,
chr13	83270062	83271995	-	exon	ENSSSCG00000011679,
chr13	86452535	86471251	-	exon	ENSSSCG00000011689,
chr13	90108498	90137838	+	exon	ENSSSCG00000027459,
chr13	90793282	90798946	-	exon	ENSSSCG00000011710,
chr13	90798827	90802075	+	exon	ENSSSCG00000011710,
chr13	91310020	91314586	+	exon	ENSSSCG00000011714,
chr13	91368437	91378095	+	exon	ENSSSCG00000011714,
chr13	92652259	92662887	+	exon	ENSSSCG00000011720,
chr13	94230984	94238685	+	exon	ENSSSCG00000024205,
chr13	94238611	94254704	+	exon	ENSSSCG00000024205,
chr13	94319174	94320360	-	exon	ENSSSCG00000024916,
chr13	94336123	94338366	-	exon	ENSSSCG00000024916,
chr13	95696483	95709483	-	exon	ENSSSCG00000025316,
chr13	95698444	95703536	-	exon	ENSSSCG00000025316,
chr13	95698444	95709483	-	exon	ENSSSCG00000025316,
chr13	95702963	95703536	-	exon	ENSSSCG00000025316,
chr13	95702963	95709483	-	exon	ENSSSCG00000025316,
chr13	95760812	95772157	+	exon	ENSSSCG00000028855,
chr13	95766107	95775714	+	exon	ENSSSCG00000028855,
chr13	95766107	95772157	+	exon	ENSSSCG00000028855,
chr13	96375651	96378417	-	intron	ENSSSCG00000030567,
chr13	96377138	96378417	-	exon	ENSSSCG00000030567,
chr13	97912254	97913066	+	exon	ENSSSCG00000027556,
chr13	97912254	97995384	+	exon	ENSSSCG00000027556,
chr13	99987011	100035111	-	exon	ENSSSCG00000011733,
chr13	100034974	100054982	-	exon	ENSSSCG00000011733,
chr13	100053038	100066548	-	exon	ENSSSCG00000011733,
chr13	100105160	100112595	+	exon	ENSSSCG00000011731,
chr13	100108435	100110232	+	exon	ENSSSCG00000011731,
chr13	100189066	100205633	-	exon	ENSSSCG00000031077,
chr13	100214973	100216874	-	exon	ENSSSCG00000031077,
chr13	100927562	100944518	+	exon	ENSSSCG00000022952,
chr13	100927562	100935178	+	exon	ENSSSCG00000022952,
chr13	108669556	108677607	+	exon	ENSSSCG00000029608,
chr13	108671003	108683011	+	exon	ENSSSCG00000029608,
chr13	108671003	108676745	+	exon	ENSSSCG00000029608,
chr13	108671003	108677607	+	exon	ENSSSCG00000029608,
chr13	108800991	108829633	-	exon	ENSSSCG00000030467,
chr13	108806397	108820326	-	exon	ENSSSCG00000030467,
chr13	108816286	108820326	-	exon	ENSSSCG00000030467,
chr13	108816286	108829633	-	exon	ENSSSCG00000030467,
chr13	108816286	108854260	-	exon	ENSSSCG00000030467,
chr13	108842609	108854260	-	exon	ENSSSCG00000030467,
chr13	108851501	108854260	-	exon	ENSSSCG00000030467,
chr13	108851501	108876279	-	exon	ENSSSCG00000030467,
chr13	108851501	108880840	-	exon	ENSSSCG00000030467,
chr13	108873722	108880840	-	intron	ENSSSCG00000030467,
chr13	108874660	108880840	-	exon	ENSSSCG00000030467,
chr13	108951348	108953964	+	exon	ENSSSCG00000011745,
chr13	108951348	108963151	+	exon	ENSSSCG00000011745,
chr13	108958194	108963151	+	exon	ENSSSCG00000011745,
chr13	110657082	110681603	+	exon	ENSSSCG00000011752,
chr13	110657082	110789120	+	exon	ENSSSCG00000011752,
chr13	110770451	110789120	+	exon	ENSSSCG00000011752,
chr13	110784615	110789120	+	exon	ENSSSCG00000011752,
chr13	110827456	110840910	+	exon	ENSSSCG00000011752,
chr13	110835616	110840910	+	exon	ENSSSCG00000011752,
chr13	110835616	110853978	+	exon	ENSSSCG00000011752,
chr13	110902286	110916337	+	exon	ENSSSCG00000011752,
chr13	110913572	110916337	+	exon	ENSSSCG00000011752,
chr13	111203637	111203789	-	intron	ENSSSCG00000011755,
chr13	113844578	113852783	+	exon	ENSSSCG00000023871,
chr13	117240823	117241978	+	exon	ENSSSCG00000030413,
chr13	117240823	117247185	+	exon	ENSSSCG00000030413,
chr13	117240823	117266971	+	exon	ENSSSCG00000030413,
chr13	117240823	117252995	+	exon	ENSSSCG00000030413,
chr13	117374444	117383262	+	intergenic_region	n/a
chr13	120756800	120765156	+	exon	ENSSSCG00000011772,
chr13	120778216	120779879	+	exon	ENSSSCG00000011772,
chr13	120778216	120795359	+	exon	ENSSSCG00000011772,
chr13	120778216	120788611	+	exon	ENSSSCG00000011772,
chr13	120919103	120935351	-	exon	ENSSSCG00000022783,
chr13	120931036	120933597	-	exon	ENSSSCG00000022783,
chr13	120931036	120935351	-	exon	ENSSSCG00000022783,
chr13	120987445	121006776	-	exon	ENSSSCG00000025942,
chr13	121003053	121006776	-	exon	ENSSSCG00000025942,
chr13	121027424	121036441	-	exon	ENSSSCG00000025942,
chr13	121052113	121059064	-	exon	ENSSSCG00000025942,
chr13	121570082	121596427	+	exon	ENSSSCG00000011775,
chr13	121570082	121577363	+	exon	ENSSSCG00000011775,
chr13	121571994	121577363	+	exon	ENSSSCG00000011775,
chr13	121576383	121596427	+	exon	ENSSSCG00000011775,
chr13	121576383	121577363	+	exon	ENSSSCG00000011775,
chr13	121699729	121700467	+	exon	ENSSSCG00000011776,
chr13	121798856	121802974	-	exon	ENSSSCG00000033424,
chr13	121801041	121802974	-	intron	ENSSSCG00000033424,
chr13	121802237	121802974	-	exon	ENSSSCG00000033424,
chr13	121908445	121911725	-	exon	ENSSSCG00000011782,
chr13	122190540	122191051	+	exon	ENSSSCG00000023998,
chr13	122253049	122253298	+	exon	ENSSSCG00000022507,
chr13	122788149	122802413	+	exon	ENSSSCG00000011788,
chr13	122822180	122835708	+	exon	ENSSSCG00000011788,
chr13	123437550	123438399	+	exon	ENSSSCG00000011794,
chr13	123437550	123447842	+	exon	ENSSSCG00000011794,
chr13	123440897	123456158	+	exon	ENSSSCG00000011794,
chr13	124784931	124787240	+	exon	ENSSSCG00000025770,
chr13	124784931	124799089	+	exon	ENSSSCG00000025770,
chr13	125959242	126013836	+	exon	ENSSSCG00000011811,
chr13	126001406	126013836	+	intron	ENSSSCG00000011811,
chr13	126013636	126013836	+	exon	ENSSSCG00000011811,
chr13	126204996	126205688	+	exon	ENSSSCG00000011811,
chr13	126248161	126248494	+	intron	ENSSSCG00000011811,
chr13	130312606	130321340	-	exon	ENSSSCG00000026260,
chr13	130504723	130528924	-	exon	ENSSSCG00000011821,
chr13	130516813	130528924	-	exon	ENSSSCG00000011821,
chr13	130630427	130631670	+	exon	ENSSSCG00000011822,
chr13	130651629	130657123	+	exon	ENSSSCG00000011822,
chr13	131424408	131426893	-	exon	ENSSSCG00000011825,
chr13	131431707	131452941	-	exon	ENSSSCG00000011825,
chr13	131438786	131452941	-	exon	ENSSSCG00000011825,
chr13	131451618	131453736	-	exon	ENSSSCG00000011825,
chr13	131451618	131452941	-	exon	ENSSSCG00000011825,
chr13	131635186	131653366	-	intergenic_region	n/a
chr13	131635186	131655833	-	intergenic_region	n/a
chr13	131641552	131642260	-	exon	ENSSSCG00000011827,
chr13	131641552	131642810	-	exon	ENSSSCG00000011827,
chr13	132302321	132314552	-	exon	ENSSSCG00000031147,
chr13	132321056	132337788	-	exon	ENSSSCG00000031147,
chr13	132325910	132337788	-	exon	ENSSSCG00000031147,
chr13	132335769	132337788	-	exon	ENSSSCG00000031147,
chr13	132831927	132837247	+	intron	ENSSSCG00000011833,
chr13	132915062	132991254	+	exon	ENSSSCG00000011833,
chr13	132915062	132945674	+	exon	ENSSSCG00000011833,
chr13	132915062	133007560	+	exon	ENSSSCG00000011833,
chr13	132915062	132975398	+	exon	ENSSSCG00000011833,
chr13	132945576	132975398	+	exon	ENSSSCG00000011833,
chr13	132945576	132991254	+	exon	ENSSSCG00000011833,
chr13	132945576	133007560	+	exon	ENSSSCG00000011833,
chr13	132960754	132991254	+	exon	ENSSSCG00000011833,
chr13	132960754	132975398	+	exon	ENSSSCG00000011833,
chr13	132960754	133023430	+	exon	ENSSSCG00000011833,
chr13	132960754	133007560	+	exon	ENSSSCG00000011833,
chr13	132986164	133052271	+	exon	ENSSSCG00000011833,
chr13	132986164	132991254	+	exon	ENSSSCG00000011833,
chr13	132986164	133023430	+	exon	ENSSSCG00000011833,
chr13	133023316	133052271	+	exon	ENSSSCG00000011833,
chr13	133048338	133052271	+	exon	ENSSSCG00000011833,
chr13	133225592	133229104	-	exon	ENSSSCG00000011841,
chr13	133296684	133305955	-	exon	ENSSSCG00000011843,
chr13	133302378	133305955	-	exon	ENSSSCG00000011843,
chr13	133302378	133312344	-	exon	ENSSSCG00000011843,
chr13	133310321	133312344	-	exon	ENSSSCG00000011843,
chr13	133710723	133727006	+	exon	ENSSSCG00000021380,
chr13	133715518	133727006	+	exon	ENSSSCG00000021380,
chr13	133976765	133979478	+	exon	ENSSSCG00000011848,
chr13	133976765	133981842	+	exon	ENSSSCG00000011848,
chr13	133976765	133984615	+	exon	ENSSSCG00000011848,
chr13	133984022	133987630	+	exon	ENSSSCG00000011848,
chr13	134233747	134234461	+	exon	ENSSSCG00000011850,
chr13	134233747	134235907	+	exon	ENSSSCG00000011850,
chr13	134375416	134384091	+	intron	ENSSSCG00000027139,
chr13	134387068	134389734	+	exon	ENSSSCG00000027139,
chr13	134457403	134471156	+	exon	ENSSSCG00000011854,
chr13	134515277	134527329	+	exon	ENSSSCG00000011854,
chr13	134515277	134519515	+	exon	ENSSSCG00000011854,
chr13	134624946	134633963	+	exon	ENSSSCG00000040273,ENSSSCG00000011857,
chr13	134744258	134769304	+	exon	ENSSSCG00000026753,
chr13	134744258	134748142	+	exon	ENSSSCG00000026753,
chr13	134838956	134857989	+	exon	ENSSSCG00000036828,
chr13	134838956	134846673	+	exon	ENSSSCG00000036828,
chr13	134998506	135020313	+	exon	ENSSSCG00000011858,
chr13	135007591	135020313	+	exon	ENSSSCG00000011858,
chr13	135019965	135050353	+	exon	ENSSSCG00000011858,
chr13	135019965	135020313	+	exon	ENSSSCG00000011858,
chr13	135060648	135062178	+	exon	ENSSSCG00000011858,
chr13	135306974	135308877	+	exon	ENSSSCG00000011859,
chr13	135308527	135308877	+	exon	ENSSSCG00000011859,
chr13	135317236	135317769	+	exon	ENSSSCG00000011859,
chr13	135702507	135702745	-	exon	ENSSSCG00000030362,
chr13	137185110	137195475	-	exon	ENSSSCG00000024904,
chr13	137185110	137226265	-	exon	ENSSSCG00000024904,
chr13	137224796	137240863	-	exon	ENSSSCG00000024904,
chr13	137373443	137376721	-	exon	ENSSSCG00000011870,
chr13	137806868	137808141	+	exon	ENSSSCG00000011873,
chr13	138045083	138073936	+	exon	ENSSSCG00000028475,
chr13	138162727	138169777	+	exon	ENSSSCG00000025107,
chr13	138651414	138667654	-	exon	ENSSSCG00000011880,ENSSSCG00000030305,
chr13	138689544	138692413	+	exon	ENSSSCG00000011881,
chr13	138771379	138781575	+	intergenic_region	n/a
chr13	138771379	138790284	+	intergenic_region	n/a
chr13	138786054	138790284	+	exon	ENSSSCG00000011882,
chr13	138817190	138819104	+	exon	ENSSSCG00000011882,
chr13	138841861	138843886	+	exon	ENSSSCG00000011882,
chr13	138852352	138856159	+	intergenic_region	n/a
chr13	140332549	140347934	+	exon	ENSSSCG00000011889,
chr13	140731010	140750477	-	exon	ENSSSCG00000037639,
chr13	140805618	140811588	+	exon	ENSSSCG00000011901,
chr13	140805618	140817139	+	exon	ENSSSCG00000011901,
chr13	140805618	140827196	+	exon	ENSSSCG00000011901,
chr13	145041194	145057713	+	intergenic_region	n/a
chr13	145888937	145924776	+	exon	ENSSSCG00000011913,
chr13	146058078	146078858	-	exon	ENSSSCG00000011915,
chr13	146159296	146162160	-	intron	ENSSSCG00000011916,
chr13	146211073	146212596	+	exon	ENSSSCG00000011917,
chr13	146257331	146269532	+	exon	ENSSSCG00000011918,
chr13	146421223	146438569	+	exon	ENSSSCG00000024663,
chr13	146421223	146428798	+	exon	ENSSSCG00000024663,
chr13	146421223	146435567	+	exon	ENSSSCG00000024663,
chr13	146924091	146925837	-	exon	ENSSSCG00000036952,
chr13	147817756	147839301	-	exon	ENSSSCG00000022081,
chr13	147837956	147839301	-	exon	ENSSSCG00000022081,
chr13	148164225	148168420	-	exon	ENSSSCG00000023993,
chr13	148496646	148534946	-	exon	ENSSSCG00000011933,
chr13	148517273	148534946	-	exon	ENSSSCG00000011933,
chr13	148522545	148534946	-	exon	ENSSSCG00000011933,
chr13	151781934	151818699	-	exon	ENSSSCG00000011943,
chr13	151797392	151818699	-	exon	ENSSSCG00000011943,
chr13	151811869	151818699	-	exon	ENSSSCG00000011943,
chr13	153642426	153647840	+	exon	ENSSSCG00000022486,
chr13	153818741	153839132	-	exon	ENSSSCG00000011946,
chr13	157429171	157436827	+	exon	ENSSSCG00000011953,
chr13	157446519	157449706	+	exon	ENSSSCG00000011953,
chr13	157476739	157484247	-	exon	ENSSSCG00000036491,
chr13	157589373	157600510	+	exon	ENSSSCG00000021791,
chr13	157589373	157628266	+	exon	ENSSSCG00000021791,
chr13	157589373	157637029	+	exon	ENSSSCG00000021791,
chr13	157615688	157628266	+	exon	ENSSSCG00000021791,
chr13	157620146	157624210	+	exon	ENSSSCG00000021791,
chr13	157622608	157622950	+	exon	ENSSSCG00000021791,
chr13	157693944	157731436	+	exon	ENSSSCG00000031273,
chr13	157715016	157731436	+	exon	ENSSSCG00000031273,
chr13	158234285	158244289	+	exon	ENSSSCG00000011959,
chr13	158599501	158613577	+	exon	ENSSSCG00000011963,
chr13	158683519	158686017	-	exon	ENSSSCG00000030486,
chr13	158683519	158693886	-	exon	ENSSSCG00000030486,
chr13	158685847	158688234	-	exon	ENSSSCG00000030486,
chr13	160181594	160204381	-	exon	ENSSSCG00000034493,
chr13	160189396	160204381	-	exon	ENSSSCG00000034493,
chr13	162388403	162419055	-	exon	ENSSSCG00000022895,
chr13	165850549	165891486	-	exon	ENSSSCG00000027571,
chr13	167824035	167842322	-	exon	ENSSSCG00000036885,
chr13	168849106	168855082	+	intergenic_region	n/a
chr13	179873033	179896221	-	intron	ENSSSCG00000021038,
chr13	179884517	179896221	-	intron	ENSSSCG00000021038,
chr13	180606799	180641372	+	exon	ENSSSCG00000024623,
chr13	180619011	180641372	+	exon	ENSSSCG00000024623,
chr13	181085608	181099942	+	intergenic_region	n/a
chr13	189153678	189155128	-	exon	ENSSSCG00000012021,
chr13	189160834	189161341	-	exon	ENSSSCG00000012021,
chr13	189297186	189305963	+	exon	ENSSSCG00000037655,
chr13	189317682	189318261	+	exon	ENSSSCG00000037655,
chr13	189505179	189528484	-	exon	ENSSSCG00000012022,
[truncated: 4,843 more rows]

## Sheet: find_circ
Identification of circRNAs by find_circ
Chrom	Start	End	Strand
chr1	23	81181793	-
chr1	27359	33429	+
chr1	38650	39951	+
chr1	128197	132692	-
chr1	171675	175755	-
chr1	476142	25526326	-
chr1	542118	542324	-
chr1	565193	567852	+
chr1	593017	598149	+
chr1	593017	611340	+
chr1	593017	619011	+
chr1	593017	643477	+
chr1	601766	27481344	+
chr1	601769	27481347	+
chr1	608275	611340	+
chr1	608275	619011	+
chr1	617144	619011	+
chr1	641933	643477	+
chr1	641933	653683	+
chr1	641933	688177	+
chr1	833314	168370960	-
chr1	1034655	236380197	+
chr1	1233509	1239619	-
chr1	1561646	179686650	-
chr1	1569658	1570432	-
chr1	1577324	1577513	-
chr1	1584179	1588947	-
chr1	1584179	1611154	-
chr1	1600086	1611154	-
chr1	1600086	1620039	-
chr1	1606214	1663793	-
chr1	1611008	1614383	-
chr1	1625112	1663793	-
chr1	1633213	1634815	-
chr1	1633213	1639323	-
chr1	1633213	1663793	-
chr1	1634703	1663793	-
chr1	1637104	29888673	-
chr1	1639165	1663793	-
chr1	1639624	126838375	-
chr1	1654691	1659647	-
chr1	1654691	1659650	-
chr1	1654691	1663793	-
chr1	1654691	1688699	-
chr1	1657902	1663793	-
chr1	1688315	1688699	-
chr1	1839160	50694573	-
chr1	1936079	1936670	-
chr1	1948389	1952054	+
chr1	2103122	2105156	-
chr1	2165424	4586782	+
chr1	2552567	2552792	+
chr1	2616558	250289613	-
chr1	3055305	129614386	+
chr1	3238763	3302802	+
chr1	3314471	3324464	+
chr1	3319773	3334483	+
chr1	3319773	3351608	+
chr1	3365070	71831753	-
chr1	4740998	218683120	-
chr1	4764697	218683107	-
chr1	4775754	34213181	-
chr1	4775754	4843415	-
chr1	4820890	4844637	-
chr1	4822371	4843415	-
chr1	4843272	4843415	-
chr1	5079350	225794172	-
chr1	5540688	5540816	-
chr1	5590198	93229951	+
chr1	5764042	22332996	+
chr1	5846864	10221283	-
chr1	5932508	179457163	+
chr1	6238237	204561683	-
chr1	6325212	132206744	-
chr1	6347864	229557203	+
chr1	6894077	6899495	-
chr1	6895016	6899204	-
chr1	6896013	6899204	-
chr1	6898048	6902240	-
chr1	6900699	6902240	-
chr1	6922950	6935891	-
chr1	7117528	7166248	-
chr1	7130416	7166248	-
chr1	7130416	7198796	-
chr1	7160498	7166248	-
chr1	7378334	7378522	-
chr1	7594611	7598381	+
chr1	7594611	7599773	+
chr1	7600868	182716096	-
chr1	7629791	179686637	-
chr1	7647835	218683107	-
chr1	7680141	179457163	+
chr1	7682746	7687499	+
chr1	7684075	7688786	+
chr1	7686443	13103961	+
chr1	7686464	126597410	-
chr1	7686464	242558371	-
chr1	7686464	87056184	-
chr1	7687318	7687441	+
chr1	7688769	7691449	+
chr1	7688811	7689510	-
chr1	7688844	7689092	+
chr1	7688862	187401452	-
chr1	7688900	179457163	+
chr1	7689314	243242555	+
chr1	7690087	179457193	+
chr1	7690667	182979070	+
chr1	7690703	7690973	-
chr1	7690735	202328975	-
chr1	7690832	179457243	-
chr1	7690880	34818643	-
chr1	8427484	231197207	+
chr1	8429563	121413723	+
chr1	8434506	8444226	+
chr1	8445100	192473962	-
chr1	8553746	9073247	-
chr1	8566408	264137759	+
chr1	8567702	81242909	-
chr1	8574423	8598060	-
chr1	8586432	8598060	-
chr1	8655094	8655271	+
chr1	8692005	165136629	-
chr1	8692073	8698741	-
chr1	8765477	131730408	-
chr1	8822876	8825081	-
chr1	8883811	162166024	+
chr1	8949348	8964165	+
chr1	8962418	8975269	+
chr1	8966938	9000364	-
chr1	9034251	9041185	-
chr1	9060509	9069255	-
chr1	9067661	163753608	+
chr1	9139950	9148944	-
chr1	9145727	9148944	-
chr1	9158691	9169598	-
chr1	9159696	9160110	-
chr1	9167470	9169598	-
chr1	9191140	9192687	-
chr1	9191140	9195425	-
chr1	9192612	9192861	-
chr1	9236846	9236970	-
chr1	9402071	179686574	-
chr1	9423376	9459996	-
chr1	9434558	9434681	+
chr1	9492459	9492750	-
chr1	9570464	9572299	+
chr1	9625522	233041247	-
chr1	9696420	9696651	-
chr1	9853907	262458495	+
chr1	9893444	9923857	-
chr1	9923613	9923857	-
chr1	9923613	9976196	-
chr1	9938948	9939115	-
chr1	9939606	69079724	+
chr1	9962478	28681587	-
chr1	9981402	127111743	-
chr1	10018829	218683127	+
chr1	10070671	10099544	-
chr1	10070671	10175846	-
chr1	10099394	10099544	-
chr1	10099394	10175846	-
chr1	10161697	10175846	-
chr1	10175651	10175846	-
chr1	11581382	121819346	-
chr1	11584816	11596113	+
chr1	11584816	271436328	+
chr1	11584816	52152735	+
chr1	11638612	179457148	+
chr1	11656689	11658867	-
chr1	11663342	11669379	-
chr1	11731351	11735531	-
chr1	11897750	11899119	-
chr1	11929990	12043885	-
chr1	11997257	112106562	+
chr1	12041131	12042596	-
chr1	12041131	12043885	-
chr1	12041131	12086591	-
chr1	12041135	12042596	-
chr1	12041135	12043885	-
chr1	12043744	90228208	+
chr1	12053594	12067216	-
chr1	12056479	12061089	-
chr1	12056479	12065074	-
chr1	12058731	12061089	-
chr1	12071469	12074918	-
chr1	12071469	12086591	-
chr1	12106323	218683107	-
chr1	12353963	12382167	+
chr1	12361986	12362794	+
chr1	12381441	12388087	+
chr1	13449104	13456999	+
chr1	13457951	179457245	+
chr1	13747196	57929450	-
chr1	13972475	13974349	+
chr1	13976186	13984651	+
chr1	14038311	14047923	+
chr1	14046057	14047923	+
chr1	14087203	14093357	+
chr1	14094421	14167020	+
chr1	14165761	14167020	+
chr1	14171674	24602151	+
chr1	14295949	83663216	+
chr1	14323735	182936079	-
chr1	14327923	250152904	-
chr1	14373231	14374308	-
chr1	14373972	14374308	-
chr1	14373972	14416451	-
chr1	14373972	14476051	-
chr1	14416334	14457143	-
chr1	14416334	14465242	-
chr1	14416334	14476051	-
chr1	14446717	14446861	+
chr1	14447633	14457143	-
chr1	14447633	14465242	-
chr1	14456952	14476051	-
chr1	14471859	131697077	-
chr1	14482312	14482888	-
chr1	14486704	51584365	-
chr1	14578240	137452617	+
chr1	14645907	14708965	-
chr1	14654773	219341383	+
chr1	14662108	14662345	-
chr1	14662108	14708965	-
chr1	14662108	14720460	-
chr1	14691077	14720460	-
chr1	14708779	14717914	-
chr1	14717674	27538113	+
chr1	14800956	14810268	+
chr1	14810159	14825397	+
chr1	14810159	14838628	+
chr1	14813379	14817648	+
chr1	14817547	14851175	+
chr1	14828547	14841778	-
chr1	14828568	14841799	-
chr1	14885680	14886144	+
chr1	15130348	15138492	+
chr1	15213062	15250781	-
chr1	15245643	15250781	-
chr1	15267538	15310812	-
chr1	15473373	151952319	-
chr1	15507495	263136280	+
chr1	15524883	15581520	-
chr1	16000211	218683075	-
chr1	16008506	16009883	-
chr1	16026126	16046215	+
chr1	16058792	16097672	-
chr1	16213455	16224015	-
chr1	16213455	85605161	-
chr1	16213570	108588611	-
chr1	16255229	16255410	+
chr1	16255229	16256925	+
chr1	16299707	16307993	+
chr1	16303740	179457245	+
chr1	16307507	16307993	+
chr1	16335744	16337886	+
chr1	16335744	16341714	+
chr1	16335744	16354548	+
chr1	16337728	16341714	+
chr1	16342978	194375859	-
chr1	16355944	16357982	+
chr1	16366074	16369805	-
chr1	16366074	16371076	-
chr1	16368498	16374414	-
chr1	16404423	203693966	+
chr1	16406040	16413956	+
chr1	16407561	16415727	+
chr1	16558807	16566086	-
chr1	16558807	16584612	-
chr1	16558807	16601946	-
chr1	16559284	16559659	+
chr1	16559694	16559889	-
chr1	16565895	16568450	-
chr1	16623654	128299905	-
chr1	17119177	254024205	+
chr1	17308911	179686544	-
chr1	17347100	236380206	-
chr1	17360526	179686520	-
chr1	17362078	179686544	-
chr1	17362824	164476791	-
chr1	17367371	266133834	+
chr1	17368245	17368403	+
chr1	17372567	17382520	-
chr1	17372567	17463579	-
chr1	17397364	179686650	-
chr1	17416513	17463579	-
chr1	17416726	202102801	-
chr1	17418850	128563071	+
chr1	17432663	203337772	-
chr1	17440433	17440563	-
chr1	17440835	17440976	-
chr1	17440996	17441166	-
chr1	17463450	17466968	-
chr1	17487275	17492630	-
chr1	17492170	178035665	-
chr1	17824813	124706539	+
chr1	17995058	218683096	-
chr1	18230149	179686644	-
chr1	18436153	18436294	-
chr1	18889321	18904036	-
chr1	18912326	19040231	-
chr1	18974327	19005183	-
chr1	18987937	19005183	-
chr1	19641981	19644100	+
chr1	19643978	19654272	+
chr1	19688505	19689513	+
chr1	19753717	19754349	-
chr1	19757130	19757429	+
chr1	19764590	19766628	+
chr1	19842577	19863126	+
chr1	20525841	20531840	-
chr1	20541275	20563336	-
chr1	20543550	167146765	-
chr1	20549776	20567142	-
chr1	20549776	20611530	-
chr1	20549776	20617175	-
chr1	20549776	20757643	-
chr1	20562204	20586996	-
chr1	20566984	20633251	-
chr1	20571856	20633251	-
chr1	20603727	179672052	-
chr1	20604705	20617175	-
chr1	20616906	20888975	-
chr1	20633121	20778068	-
chr1	20633121	20804689	-
chr1	20776416	20798556	-
chr1	20782262	20784622	-
chr1	20782262	20798556	-
chr1	20795430	35971011	-
chr1	20796474	20798556	-
chr1	20803182	20804689	-
chr1	20803182	20814789	-
chr1	20803182	20826456	-
chr1	20821001	20826456	-
chr1	20832278	20898786	-
chr1	20832306	179686657	+
chr1	20832310	229846329	-
chr1	20841195	20910141	-
chr1	20842875	88660327	+
chr1	20850877	20898786	-
chr1	20869921	20876823	-
chr1	20873893	20886741	-
chr1	20873893	20888975	-
chr1	20873893	20896570	-
chr1	20873893	20910141	-
chr1	20880685	20886741	-
chr1	20880685	20888975	-
chr1	20880685	20898786	-
chr1	20897740	20913116	-
chr1	20908945	20913116	-
chr1	20908951	20913116	-
chr1	20908951	20917634	-
chr1	20986244	21541939	-
chr1	21043563	22735094	-
chr1	21416369	21417555	-
chr1	21416369	21426703	-
chr1	21445574	21461297	-
chr1	21445574	21475169	-
chr1	21461220	21487778	-
chr1	21541771	21560234	-
chr1	21775160	21781094	-
chr1	21779718	21781094	-
chr1	22237974	49919338	-
chr1	22268061	22274619	+
chr1	22268061	22352249	+
chr1	22274445	22285821	+
chr1	22274445	22352249	+
chr1	22280434	22285821	+
chr1	22285743	22296030	+
chr1	22285743	22352249	+
chr1	22285746	22296030	+
chr1	22285746	22352249	+
chr1	22322624	179457163	+
chr1	22339485	22339784	-
chr1	22342607	123637154	+
chr1	22352135	22354578	+
chr1	22352135	22423361	+
chr1	22664707	22671408	-
chr1	22693670	22706363	-
chr1	22697936	22702075	-
chr1	22697936	22706363	-
chr1	22701913	99585343	+
chr1	22719643	22735094	-
chr1	22723910	129924420	-
chr1	22731267	22731891	-
chr1	22731267	22735094	-
chr1	22731267	22756500	-
chr1	22731270	22735094	-
chr1	22731541	22731695	-
chr1	22869158	179686650	-
chr1	22869158	218683120	-
chr1	22871763	22898956	-
chr1	22880594	22891772	-
chr1	22880594	22901667	-
chr1	22891663	22901667	-
chr1	24314750	218683131	-
chr1	24635336	24698726	-
chr1	25282322	25312188	-
chr1	25514100	69590325	-
chr1	25523035	25528664	+
chr1	25526209	25528664	+
chr1	25526209	25555966	+
chr1	25553724	237833811	-
chr1	25556204	179457163	+
chr1	25600387	25608520	-
chr1	25761292	271078238	+
chr1	25837470	179457163	+
chr1	25904242	25924903	+
chr1	25983219	104877239	-
chr1	26003762	26009173	-
chr1	26070037	26070251	-
chr1	26074855	35069493	-
chr1	26150822	26159419	-
chr1	26166766	271613583	+
chr1	26305351	179457163	+
chr1	26479368	26481754	+
chr1	27046255	27055160	+
chr1	27047110	27049679	-
chr1	27419520	27530363	+
chr1	27429054	27450660	+
chr1	27450520	27478260	+
chr1	27450520	27509893	+
chr1	27459313	27478260	+
chr1	27472675	27473929	+
chr1	27472675	27475478	+
chr1	27472675	27478260	+
chr1	27473760	27478260	+
chr1	27594927	68871508	+
chr1	27664332	131023120	+
chr1	27712440	57653416	-
chr1	27781802	179457163	+
chr1	27881649	179457163	+
chr1	27882049	27882196	+
chr1	27886998	179457125	-
chr1	27888750	27891169	+
chr1	27891099	27899982	+
chr1	27891116	137947096	+
chr1	27899835	249903607	+
chr1	27966284	27975041	-
chr1	27966284	28003206	-
chr1	27980658	28003206	-
chr1	28114053	179671893	-
chr1	28312813	33773215	+
chr1	28572082	28574012	+
chr1	28572082	28589887	+
chr1	28641446	28659818	+
chr1	28982359	29027965	+
chr1	29003156	43109401	+
chr1	29018350	29027965	+
chr1	29018350	29042644	+
chr1	29027847	29042644	+
chr1	29027847	29046743	+
chr1	29027856	113038995	-
chr1	29371648	182234784	-
chr1	29855941	29883618	+
chr1	29878835	29883618	+
chr1	31192416	179457163	+
chr1	31208625	74223053	+
chr1	31232548	179457230	-
chr1	31303622	31305779	+
chr1	31676575	100838513	+
chr1	31970092	31991763	+
chr1	31971720	31991763	+
chr1	31980771	31982095	+
chr1	31980771	31984604	+
chr1	31980771	31991763	+
chr1	31986717	179457193	+
chr1	31988644	31991763	+
chr1	32238488	32242550	+
chr1	32277227	32340691	-
chr1	32299904	32354628	-
chr1	32316913	32354628	-
chr1	32520012	32522430	+
chr1	32592750	186940362	+
chr1	32926687	131742646	-
chr1	32942819	129661525	-
chr1	33271333	33278592	-
chr1	33271333	33315782	-
chr1	33280749	33284458	-
chr1	33284372	33317546	+
chr1	33435566	159132258	-
chr1	33651341	123671511	+
chr1	33651341	33664847	+
chr1	33651341	33681370	+
chr1	33651341	33695033	+
chr1	33651341	33696120	+
chr1	33651341	34693721	+
chr1	33672927	33676063	+
chr1	33672927	33681370	+
chr1	33672927	33685503	+
chr1	33672927	33688533	+
chr1	33672927	33696120	+
chr1	33672927	33710494	+
chr1	33685343	33688533	+
chr1	33685343	33696120	+
chr1	33694826	33696120	+
chr1	33716985	33717341	-
chr1	33717612	126906771	+
chr1	33775135	33790484	-
chr1	33867865	33871016	-
chr1	33877835	234524421	+
chr1	33879353	189439619	-
chr1	33884805	33901143	-
chr1	33897608	33901143	-
chr1	33950091	33968583	-
chr1	34013653	179686667	-
chr1	34166377	34213181	-
chr1	34205897	34213181	-
chr1	34309932	154245708	-
chr1	34532142	34615796	-
chr1	34705992	34706142	-
chr1	34713065	201426172	-
chr1	34722110	67574338	-
chr1	34734175	34734328	+
chr1	34735068	165141468	+
chr1	34747574	34747723	+
chr1	34747574	34747732	+
chr1	34782231	179457193	+
chr1	34791672	141256901	+
chr1	34803046	128214959	-
chr1	34804421	157997834	-
chr1	34820885	34821008	+
chr1	34820885	34976153	+
chr1	34820885	35034972	+
chr1	34830881	140022434	-
chr1	34882057	141118821	+
chr1	34896731	34897003	+
chr1	34896731	34976153	+
chr1	34896731	35005706	+
chr1	34896731	35034972	+
chr1	34896731	35216500	+
chr1	34896847	35005644	-
chr1	34927512	179457163	+
chr1	34942809	34942960	-
chr1	34973378	35034972	+
chr1	34973769	134718915	-
chr1	35005531	35005706	+
chr1	35005531	35034972	+
chr1	35034921	179457163	+
chr1	35058159	35059718	+
chr1	35131946	35145478	+
chr1	35131946	35158957	+
chr1	35131946	35216500	+
chr1	35131946	55865599	+
chr1	35138979	35158957	+
chr1	35155377	179457163	+
chr1	35162147	35162293	+
chr1	35179404	35179550	-
chr1	35183708	141321063	+
chr1	35204518	179457153	-
chr1	35219634	182585052	-
chr1	35257539	179457163	+
chr1	35920183	65927485	+
chr1	36602344	36604693	-
chr1	36964150	36977054	-
chr1	36964150	36978525	-
chr1	36964150	36994867	-
chr1	36972114	36994867	-
chr1	36985760	36994867	-
chr1	36986916	36994867	-
chr1	37010120	37014320	-
chr1	37039842	37040006	-
chr1	37077552	179671917	+
chr1	37093014	62135803	-
chr1	37122168	37122389	-
chr1	37122168	37167150	-
chr1	37122168	37182851	-
chr1	37694579	37705808	-
chr1	37729184	37729292	+
chr1	37794066	37802754	+
chr1	37948139	119818617	+
chr1	39853856	39862216	-
chr1	40116744	40119904	+
chr1	40140470	40140752	+
chr1	40156707	40167968	-
chr1	40157757	40164224	-
chr1	40167840	40168232	-
chr1	40219225	217955279	-
chr1	41076031	41083592	+
chr1	41076031	41116414	+
chr1	41076031	41125601	+
chr1	41083414	41097838	+
chr1	41083414	41104343	+
chr1	41083414	41164096	+
chr1	41083414	41180922	+
chr1	41091916	113099893	-
chr1	41095323	41149254	+
chr1	41095323	41199877	+
chr1	41097746	203689901	+
chr1	41101993	41121032	+
chr1	41101993	41125601	+
chr1	41105606	123325236	-
chr1	41120889	41247966	+
chr1	41135587	41149254	+
chr1	41135587	41180922	+
chr1	41135587	41207401	+
chr1	41144281	41149254	+
chr1	41144281	41164096	+
chr1	41144281	41177466	+
chr1	41144281	41180922	+
chr1	41144281	41247966	+
chr1	41156311	41180922	+
chr1	41199751	41230402	+
chr1	41199751	41247966	+
chr1	41667038	41667226	+
chr1	41813414	179671952	-
chr1	41846181	179686650	-
chr1	42775178	179457279	-
chr1	42782279	120304344	-
chr1	42844616	42844770	-
chr1	43380272	221271121	+
chr1	43512465	179457163	+
chr1	43527267	43551572	+
chr1	44152201	44154573	-
chr1	44163929	44171097	-
chr1	44185594	141401321	-
chr1	44264933	44279238	+
chr1	44270419	44276727	+
chr1	44305882	44312319	-
chr1	44305882	44329819	-
chr1	44323600	44329819	-
chr1	44350059	126840126	-
chr1	44350059	126867756	-
chr1	44921011	44930487	-
chr1	44928512	44930487	-
chr1	44928512	44935340	-
chr1	44930392	44935340	-
chr1	45159939	239243441	-
chr1	45173523	45175282	+
chr1	45173523	45175843	+
chr1	45173523	45177436	+
chr1	45173526	45175282	+
chr1	45173526	45175843	+
chr1	45173526	45177436	+
chr1	45175189	45175843	+
chr1	45175189	45177436	+
chr1	45232833	45233102	+
chr1	45263742	45293515	+
chr1	45263772	179457193	+
chr1	45269962	45270152	+
chr1	45285150	139554900	+
chr1	45289673	271637336	-
chr1	45292435	45292601	-
chr1	45604503	203693959	-
chr1	45828388	95572710	+
chr1	48772525	179457148	+
chr1	49150545	271101951	-
chr1	49916144	49932071	-
chr1	49931982	49945305	-
chr1	50470735	50471100	-
chr1	50794704	50832203	+
chr1	50828903	50832203	+
chr1	50832069	50838859	+
chr1	50832069	50857783	+
chr1	50832069	50870956	+
chr1	50832069	51866552	+
chr1	50870875	50913936	+
chr1	50870875	50933259	+
chr1	51364976	51365837	-
chr1	51370542	51370727	+
chr1	51375425	253328547	-
chr1	51375425	51388730	-
chr1	51393225	84276172	-
chr1	51401651	143499055	-
chr1	51404491	51406069	+
chr1	51404930	265807583	+
chr1	51414352	200912301	-
chr1	51416067	51417919	-
chr1	51416067	51422766	-
chr1	51416841	179672065	+
chr1	51422907	51423519	-
chr1	51424556	51425934	+
chr1	51807847	238169189	-
chr1	51865350	51866552	+
chr1	51909279	227776969	-
chr1	51943586	182979078	+
chr1	52018655	179457255	-
chr1	52031590	145152769	-
chr1	52035720	52179177	+
chr1	52036873	194622737	+
chr1	52076725	52130474	+
chr1	52087920	179457193	+
chr1	52092197	52130474	+
chr1	52092491	52130474	+
chr1	52123107	52152735	+
chr1	52123107	52179177	+
chr1	52130361	52152735	+
chr1	52130361	52179177	+
chr1	52134345	52179177	+
chr1	52134347	52179177	+
chr1	52146556	52152735	+
chr1	52146556	52179177	+
chr1	52218101	188420080	-
chr1	52267117	271430857	-
chr1	52365017	52378344	-
chr1	52681345	179457148	+
chr1	52764468	52800752	+
chr1	53129312	208400488	-
chr1	53152425	53157947	+
chr1	53273525	53274964	+
chr1	53316765	179457163	+
chr1	53361604	53402802	-
chr1	53367765	53384714	-
chr1	53367765	53388118	-
chr1	53378682	53384714	-
chr1	53378682	53388118	-
chr1	53382543	53388118	-
chr1	53382543	53440883	-
chr1	53396206	53402802	-
chr1	53396206	53413955	-
chr1	53396206	53440883	-
chr1	53397626	53397909	-
chr1	53397626	53413955	-
chr1	53397626	53440883	-
chr1	53409337	53413955	-
chr1	53409337	53422321	-
chr1	53409337	53425327	-
chr1	53412596	157803954	-
chr1	53412629	53412794	-
chr1	53413839	166921486	-
chr1	53413839	53422321	-
chr1	53861602	53862481	+
chr1	54461975	54494313	-
chr1	54461975	54529700	-
chr1	54462731	54502778	-
chr1	54465664	54466491	-
chr1	54472560	54475021	-
chr1	54474920	54494313	-
chr1	54487285	54529700	-
chr1	54494180	54502778	-
chr1	54507374	179686637	-
chr1	54508646	54529700	-
chr1	54528561	54529700	-
chr1	54529579	54537059	-
chr1	54564232	179457230	-
chr1	54567657	54581212	-
chr1	54567657	54597474	-
chr1	54568979	118998680	-
chr1	54576237	54576836	-
chr1	54576237	54581212	-
chr1	55666251	55669095	+
chr1	55666251	55694602	+
chr1	55684768	139239692	+
chr1	55697391	92424188	-
chr1	55711083	55712506	-
chr1	55724063	55725943	-
chr1	55835923	55843526	+
chr1	55906697	55908943	-
chr1	55937065	55954186	-
chr1	55990772	55997866	+
chr1	55992544	56006189	+
chr1	55995700	56000362	+
chr1	56001861	56006189	+
chr1	56001861	56034992	+
chr1	56017520	56041001	+
chr1	56047768	56052896	-
chr1	56049752	56052896	-
chr1	56065551	56065762	-
chr1	56901360	56902078	-
chr1	56901360	56979996	-
chr1	56931396	161291853	+
chr1	56960509	57031666	-
chr1	56960509	57037382	-
chr1	56979831	56987501	-
chr1	56979831	57037382	-
chr1	57030071	57037382	-
chr1	57101920	179457148	+
chr1	57131033	137878802	+
chr1	57178332	57178475	+
chr1	57191814	57212514	+
chr1	57338389	57339736	+
chr1	57347200	57354474	-
chr1	57349314	57354474	-
chr1	57354342	57356782	-
chr1	57385548	57393736	-
chr1	57390865	57402221	-
chr1	57392228	57393736	-
chr1	57489669	180564748	+
chr1	57506363	57506563	+
chr1	57590702	149689048	+
chr1	57615623	57618602	+
chr1	57626338	57627778	+
chr1	57691235	57691798	-
chr1	57697708	57714508	-
chr1	57702834	57704684	-
chr1	57759705	57771229	-
chr1	57782426	57785737	-
chr1	57788271	57790359	-
chr1	57800377	57800994	-
chr1	57804955	268012773	+
chr1	57804957	268012775	+
chr1	57845046	57850879	+
chr1	57858192	123359759	-
chr1	57864190	57865103	+
chr1	57922227	108987256	-
chr1	57936434	179672052	-
chr1	57936434	179686644	-
chr1	58071935	58192463	-
chr1	58073519	134280372	-
chr1	58131157	218683096	-
chr1	58191655	58192463	-
chr1	58483234	181739855	+
chr1	58515790	58521489	-
chr1	58519671	58523658	-
chr1	58973468	171614502	+
chr1	60823018	108443369	-
chr1	62729818	190892737	+
chr1	62911461	62916371	+
chr1	62926724	179457163	+
chr1	63639908	63698684	+
chr1	63643331	63646287	+
chr1	63661060	63672990	+
chr1	63697595	63698684	+
chr1	63697599	63698684	+
chr1	63699528	63700260	+
chr1	64083424	108249627	-
chr1	65879715	65911662	-
chr1	65894299	65911662	-
chr1	65894299	65921100	-
chr1	65919747	65921100	-
chr1	66347164	91475497	+
chr1	66351850	66351985	-
chr1	66353975	66356192	-
chr1	66353975	66358900	-
chr1	66353975	66360969	-
[truncated: 26,615 more rows]

## Sheet: MapSplice
Identification of circRNAs by MapSplice
[truncated: 2,400 more rows]
