# Supplementary material for: Emerging Roles of Heat-Induced circRNAs Related to Lactogenesis in Lactating Sows
Source: Front Genet. 2020 Feb 11;10:1347. doi: 10.3389/fgene.2019.01347 (PMC7027193; doi:10.3389/fgene.2019.01347)
Supplement: Supplementary file 6 [file Table_4.xlsx]

## Sheet: A
Prediction of circRNAs identified by five different prediction algorithms
Name	Chrom	Start	End	Strand	Hosting isoform	Gene_id	Gene_short_name
circAASDH	8	55614207	55623888	-	ENSSSCT00000053182	ENSSSCG00000027403	AASDH
circABCA1	1	246238088	246243861	-	ENSSSCT00000005966	ENSSSCG00000005423	ABCA1
circABCA13	9	135136103	135139603	+	ENSSSCT00000038454	ENSSSCG00000031141	ABCA13
circABCA6	12	11253177	11268222	+	ENSSSCT00000018785	ENSSSCG00000017256	ABCA6
circABL2	9	120907570	120909200	-	ENSSSCT00000054313	ENSSSCG00000024674	ABL2
circABLIM2	8	3012368	3014564	+	ENSSSCT00000009541	ENSSSCG00000008721	ABLIM2
circACACA_1	12	38591576	38592526	-	ENSSSCT00000042467	ENSSSCG00000017694	ACACA
circACACA_2	12	38729381	38750304	-	ENSSSCT00000042467	ENSSSCG00000017694	ACACA
circACACA_3	12	38691031	38716290	-	ENSSSCT00000042467	ENSSSCG00000017694	ACACA
circACACA_4	12	38711799	38716290	-	ENSSSCT00000042467	ENSSSCG00000017694	ACACA
circACACA_5	12	38760071	38765156	-	ENSSSCT00000042467	ENSSSCG00000017694	ACACA
circACADM	6	137555741	137556514	-	ENSSSCT00000061492	ENSSSCG00000003776	ACADM
circACAP2	13	132321055	132337788	-	ENSSSCT00000055236	ENSSSCG00000031147	ACAP2
circACAT1	9	36537602	36540781	+	ENSSSCT00000037844	ENSSSCG00000026153	ACAT1
circACBD5	10	48911447	48916899	-	ENSSSCT00000038370	ENSSSCG00000011064	ACBD5
circACSL3_1	15	124793831	124795119	+	ENSSSCT00000055736	ENSSSCG00000016223	ACSL3
circACSL3_2	15	124797528	124799170	+	ENSSSCT00000055736	ENSSSCG00000016223	ACSL3
circACSL3_3	15	124765849	124783671	+	ENSSSCT00000055736	ENSSSCG00000016223	ACSL3
circACSL3_4	15	124797528	124802459	+	ENSSSCT00000055736	ENSSSCG00000016223	ACSL3
circACSL3_5	15	124765849	124791551	+	ENSSSCT00000055736	ENSSSCG00000016223	ACSL3
circACSL6_1	2	134228133	134233031	-	ENSSSCT00000064403	ENSSSCG00000014272	ACSL6
circACSL6_2	2	134226908	134238898	-	ENSSSCT00000064403	ENSSSCG00000014272	ACSL6
circACSL6_3	2	134226908	134233031	-	ENSSSCT00000064403	ENSSSCG00000014272	ACSL6
circACSL6_4	2	134232914	134238898	-	ENSSSCT00000064403	ENSSSCG00000014272	ACSL6
circACSS3_1	5	100325825	100337751	-	ENSSSCT00000053340	ENSSSCG00000000939	ACSS3
circACSS3_2	5	100294417	100311221	-	ENSSSCT00000053340	ENSSSCG00000000939	ACSS3
circACSS3_3	5	100337599	100370383	-	ENSSSCT00000053340	ENSSSCG00000000939	ACSS3
circACSS3_4	5	100308043	100325929	-	ENSSSCT00000053340	ENSSSCG00000000939	ACSS3
circACTR3B_1	18	4718565	4730946	-	ENSSSCT00000049532	ENSSSCG00000016426	ACTR3B
circACTR3B_2	18	4697809	4703032	-	ENSSSCT00000049532	ENSSSCG00000016426	ACTR3B
circACVR1	15	64759480	64795113	-	ENSSSCT00000045475	ENSSSCG00000015874	ACVR1
circACVR2A	15	4207162	4211249	-	ENSSSCT00000046920	ENSSSCG00000015669	ACVR2A
circADAM17_1	3	126846418	126848971	+	ENSSSCT00000009451	ENSSSCG00000008641	ADAM17
circADAM17_2	3	126848010	126848971	+	ENSSSCT00000009451	ENSSSCG00000008641	ADAM17
circADAMTS12	16	19906266	19906628	-	ENSSSCT00000018309	ENSSSCG00000016816	ADAMTS12
circADAMTS9	13	46152752	46164484	-	ENSSSCT00000064506	ENSSSCG00000011496	ADAMTS9
circADAT1_1	6	12085352	12085956	+	ENSSSCT00000062617	ENSSSCG00000002706	ADAT1
circADCY1_2	18	50106627	50125659	-	ENSSSCT00000018207	ENSSSCG00000016726	ADCY1
circADCY1_3	18	50085985	50087751	-	ENSSSCT00000018207	ENSSSCG00000016726	ADCY1
circADCY1_4	18	50093866	50125659	-	ENSSSCT00000018207	ENSSSCG00000016726	ADCY1
circADCY1_5	18	50106627	50113141	-	ENSSSCT00000018207	ENSSSCG00000016726	ADCY1
circADGRA3	8	16728874	16755944	-	ENSSSCT00000037721	ENSSSCG00000008753	ADGRA3
circADGRG6_1	1	22697936	22706363	-	ENSSSCT00000053391	ENSSSCG00000004139	ADGRG6
circADGRG6_2	1	22719643	22735094	-	ENSSSCT00000053391	ENSSSCG00000004139	ADGRG6
circADGRG6_3	1	22731267	22735094	-	ENSSSCT00000053391	ENSSSCG00000004139	ADGRG6
circADPRM	12	55430701	55432293	+	ENSSSCT00000019603	ENSSSCG00000018009	ADPRM
circAFDN_1	1	1657902	1663793	-	ENSSSCT00000004443	ENSSSCG00000004018	AFDN
circAFDN_2	1	1600086	1620039	-	ENSSSCT00000004443	ENSSSCG00000004018	AFDN
circAFDN_3	1	1654691	1663793	-	ENSSSCT00000004443	ENSSSCG00000004018	AFDN
circAFF2	X	120944618	120945464	+	ENSSSCT00000013917	ENSSSCG00000012730	AFF2
circAFG1L	1	74503237	74545066	+	ENSSSCT00000046117	ENSSSCG00000040199	AFG1L
circAFTPH	3	77360558	77371938	-	ENSSSCT00000044463	ENSSSCG00000008363	AFTPH
circAGAP1_1	15	135707738	135716699	+	ENSSSCT00000060683	ENSSSCG00000016317	AGAP1
circAGAP1_2	15	135653696	135663172	+	ENSSSCT00000060683	ENSSSCG00000016317	AGAP1
circAGBL2	2	14951584	14958977	+	ENSSSCT00000038642	ENSSSCG00000040838	AGBL2
circAGK	18	8305621	8320935	-	ENSSSCT00000017956	ENSSSCG00000016492	AGK
circAGL_1	4	118192075	118199768	-	ENSSSCT00000007525	ENSSSCG00000006872	AGL
circAGL_2	4	118211128	118230068	-	ENSSSCT00000007525	ENSSSCG00000006872	AGL
circAGO3	6	92193859	92197354	+	ENSSSCT00000038441	ENSSSCG00000003630	AGO3
circAKAP10	12	59744648	59777382	+	ENSSSCT00000026010	ENSSSCG00000024030	AKAP10
circAKAP11	11	24729024	24739289	-	ENSSSCT00000064995	ENSSSCG00000009430	AKAP11
circAKAP6	7	67280597	67280955	-	ENSSSCT00000058475	ENSSSCG00000024517	AKAP6
circALCAM	13	153818740	153839132	-	ENSSSCT00000032688	ENSSSCG00000011946	ALCAM
circALDH7A1	2	129669692	129675119	-	ENSSSCT00000062287	ENSSSCG00000014247	ALDH7A1
circALMS1_1	3	69377497	69401023	-	ENSSSCT00000042211	ENSSSCG00000037977	ALMS1
circALMS1_2	3	69377497	69390965	-	ENSSSCT00000042211	ENSSSCG00000037977	ALMS1
circAMBRA1_1	2	15968764	15970677	+	ENSSSCT00000035985	ENSSSCG00000013262	AMBRA1
circAMBRA1_2	2	15967839	15970677	+	ENSSSCT00000035985	ENSSSCG00000013262	AMBRA1
circAMBRA1_3	2	16075109	16086983	+	ENSSSCT00000035985	ENSSSCG00000013262	AMBRA1
circAMDHD1	5	87553021	87554273	-	ENSSSCT00000000977	ENSSSCG00000000893	AMDHD1
circAMN1	5	42538536	42543247	+	ENSSSCT00000054232	ENSSSCG00000034407	AMN1
circAMOTL1	9	26899160	26905802	+	ENSSSCT00000016321	ENSSSCG00000014960	AMOTL1
circANAPC1	3	44522988	44535936	+	ENSSSCT00000051961	ENSSSCG00000008105	ANAPC1
circANKFY1	12	50206419	50213931	-	ENSSSCT00000043120	ENSSSCG00000017877	ANKFY1
circANKHD1	2	142190604	142202172	+	ENSSSCT00000015694	ENSSSCG00000014364	ANKHD1
circANKIB1	9	72230095	72242063	+	ENSSSCT00000016687	ENSSSCG00000015314	ANKIB1
circANKRD12_1	6	98742426	98790460	-	ENSSSCT00000004080	ENSSSCG00000003682	ANKRD12
circANKRD12_2	6	98754168	98790460	-	ENSSSCT00000004080	ENSSSCG00000003682	ANKRD12
circANKRD13C	6	142596764	142602446	+	ENSSSCT00000047894	ENSSSCG00000003790	ANKRD13C
circANKRD17	8	69374300	69381214	-	ENSSSCT00000028188	ENSSSCG00000024592	ANKRD17
circANKRD42_1	9	17351071	17373225	+	ENSSSCT00000050097	ENSSSCG00000014902	ANKRD42
circANKRD42_2	9	17351071	17398149	+	ENSSSCT00000050097	ENSSSCG00000014902	ANKRD42
circANKRD44	15	100981698	100990930	-	ENSSSCT00000041974	ENSSSCG00000016074	ANKRD44
circANTXR2	8	137747352	137749645	+	ENSSSCT00000054711	ENSSSCG00000009256	ANTXR2
circANXA4	3	72640034	72645477	-	ENSSSCT00000063687	ENSSSCG00000008336	ANXA4
circAP1G1	6	14749212	14783640	-	ENSSSCT00000003036	ENSSSCG00000002740	AP1G1
circAP2A1	6	54801798	54802488	+	ENSSSCT00000003554	ENSSSCG00000003199	AP2A1
circAP2A2	2	603366	606966	+	ENSSSCT00000014031	ENSSSCG00000012836	AP2A2
circAPC	2	116974277	116975681	-	ENSSSCT00000057827	ENSSSCG00000014207	APC
circAPLP2	9	56834107	56845084	+	ENSSSCT00000016613	ENSSSCG00000015244	APLP2
circAQR	1	136175601	136179661	+	ENSSSCT00000040622	ENSSSCG00000004802	AQR
circARAP1	15	106955728	106961095	-	ENSSSCT00000017550	ENSSSCG00000016119	ARAP1
circARCN1_1	9	45877119	45890219	+	ENSSSCT00000053716	ENSSSCG00000030053	ARCN1
circARCN1_2	9	45877119	45880176	+	ENSSSCT00000053716	ENSSSCG00000030053	ARCN1
circARFGAP3_1	5	6010063	6011187	+	ENSSSCT00000040515	ENSSSCG00000000037	ARFGAP3
circARFGAP3_2	5	6022835	6033767	+	ENSSSCT00000040515	ENSSSCG00000000037	ARFGAP3
circARFGAP3_3	5	6007303	6014815	+	ENSSSCT00000040515	ENSSSCG00000000037	ARFGAP3
circARFGAP3_4	5	6010063	6014815	+	ENSSSCT00000040515	ENSSSCG00000000037	ARFGAP3
circARFGEF1	4	67516637	67518910	+	ENSSSCT00000006796	ENSSSCG00000006201	ARFGEF1
circARFIP1	8	76195575	76237387	-	ENSSSCT00000048346	ENSSSCG00000009010	ARFIP1
circARHGAP1	2	15838941	15839476	+	ENSSSCT00000056878	ENSSSCG00000013256	ARHGAP1
circARHGAP10_1	8	80682787	80706483	-	ENSSSCT00000009887	ENSSSCG00000009029	ARHGAP10
circARHGAP10_2	8	80787215	80815987	-	ENSSSCT00000009887	ENSSSCG00000009029	ARHGAP10
circARHGAP10_3	8	80682787	80742382	-	ENSSSCT00000009887	ENSSSCG00000009029	ARHGAP10
circARHGAP10_4	8	80742231	80815987	-	ENSSSCT00000009887	ENSSSCG00000009029	ARHGAP10
circARHGAP10_5	8	80800576	80815987	-	ENSSSCT00000009887	ENSSSCG00000009029	ARHGAP10
circARHGAP12_1	10	42468076	42490463	-	ENSSSCT00000012068	ENSSSCG00000011026	ARHGAP12
circARHGAP12_2	10	42468076	42479927	-	ENSSSCT00000012068	ENSSSCG00000011026	ARHGAP12
circARHGAP12_3	10	42501578	42510787	-	ENSSSCT00000012068	ENSSSCG00000011026	ARHGAP12
circARHGAP12_4	10	42497972	42510787	-	ENSSSCT00000012068	ENSSSCG00000011026	ARHGAP12
circARHGAP18_1	1	33672927	33696120	+	ENSSSCT00000047609	ENSSSCG00000004205	ARHGAP18
circARHGAP18_2	1	33672927	33710494	+	ENSSSCT00000047609	ENSSSCG00000004205	ARHGAP18
circARHGAP21	10	50648676	50649078	+	ENSSSCT00000028075	ENSSSCG00000011074	ARHGAP21
circARHGAP26	2	144609014	144612731	+	ENSSSCT00000015737	ENSSSCG00000014399	ARHGAP26
circARHGAP29_1	4	123091579	123125471	+	ENSSSCT00000007543	ENSSSCG00000006889	ARHGAP29
circARHGAP29_2	4	123121211	123125471	+	ENSSSCT00000007543	ENSSSCG00000006889	ARHGAP29
circARHGAP29_3	4	123116609	123125471	+	ENSSSCT00000007543	ENSSSCG00000006889	ARHGAP29
circARHGAP5_1	7	67576363	67580251	-	ENSSSCT00000065462	ENSSSCG00000001966	ARHGAP5
circARHGAP5_2	7	67554147	67580251	-	ENSSSCT00000065462	ENSSSCG00000001966	ARHGAP5
circARHGAP5_3	7	67503508	67554295	-	ENSSSCT00000065462	ENSSSCG00000001966	ARHGAP5
circARHGEF10	15	33441213	33441613	+	ENSSSCT00000031893	ENSSSCG00000023419	ARHGEF10
circARHGEF28	2	83021037	83043044	+	ENSSSCT00000044843	ENSSSCG00000028317	ARHGEF28
circARHGEF38	8	116090563	116091889	-	ENSSSCT00000030948	ENSSSCG00000021764	ARHGEF38
circARHGEF40	7	78055270	78056399	-	ENSSSCT00000022496	ENSSSCG00000023857	ARHGEF40
circARHGEF6	X	111851064	111867418	-	ENSSSCT00000048129	ENSSSCG00000030460	ARHGEF6
circARID1A_1	6	84105756	84108248	+	ENSSSCT00000063135	ENSSSCG00000003559	ARID1A
circARID1A_2	6	84075835	84080165	+	ENSSSCT00000063135	ENSSSCG00000003559	ARID1A
circARID1B	1	9893444	9923857	-	ENSSSCT00000053144	ENSSSCG00000004064	ARID1B
circARID4A	1	187391639	187401467	+	ENSSSCT00000005590	ENSSSCG00000005073	ARID4A
circARID4B_1	14	56073931	56077868	+	ENSSSCT00000058584	ENSSSCG00000010156	ARID4B
circARID4B_2	14	56018600	56032249	+	ENSSSCT00000058584	ENSSSCG00000010156	ARID4B
circARIH1_1	7	60731691	60732585	-	ENSSSCT00000030450	ENSSSCG00000023188	ARIH1
circARIH1_2	7	60723645	60728445	-	ENSSSCT00000030450	ENSSSCG00000023188	ARIH1
circARIH2	13	31604186	31613159	+	ENSSSCT00000050798	ENSSSCG00000011367	ARIH2
circARL1	5	82803581	82804808	+	ENSSSCT00000043304	ENSSSCG00000000870	ARL1
circARL2BP	6	19208371	19212750	+	ENSSSCT00000003119	ENSSSCG00000002819	ARL2BP
circARMH3	14	112981466	112990508	-	ENSSSCT00000040717	ENSSSCG00000010571	ARMH3
circARSB	2	87745802	87760449	-	ENSSSCT00000052892	ENSSSCG00000038535	ARSB
circASAH1	17	5719250	5733109	-	ENSSSCT00000007660	ENSSSCG00000006995	ASAH1
circASAP1	4	10374028	10386233	+	ENSSSCT00000050422	ENSSSCG00000028759	ASAP1
circASAP2_1	3	126975535	126992124	-	ENSSSCT00000043441	ENSSSCG00000008642	ASAP2
circASAP2_2	3	126954298	126961596	-	ENSSSCT00000043441	ENSSSCG00000008642	ASAP2
circASAP2_3	3	126966434	126975957	-	ENSSSCT00000043441	ENSSSCG00000008642	ASAP2
circASAP2_4	3	126987824	126992124	-	ENSSSCT00000043441	ENSSSCG00000008642	ASAP2
circASCC3	1	67576478	67578266	-	ENSSSCT00000058812	ENSSSCG00000004358	ASCC3
circASH1L_1	4	94324417	94353369	+	ENSSSCT00000007128	ENSSSCG00000006508	ASH1L
circASH1L_2	4	94405983	94418263	+	ENSSSCT00000007128	ENSSSCG00000006508	ASH1L
circASH1L_3	4	94313135	94324938	+	ENSSSCT00000007128	ENSSSCG00000006508	ASH1L
circATAD2	4	16041989	16046043	+	ENSSSCT00000055665	ENSSSCG00000005983	ATAD2
circATAD2B_1	3	114743497	114755035	+	ENSSSCT00000009403	ENSSSCG00000008591	ATAD2B
circATAD2B_2	3	114783338	114785114	+	ENSSSCT00000009403	ENSSSCG00000008591	ATAD2B
circATAD2B_3	3	114743497	114751378	+	ENSSSCT00000009403	ENSSSCG00000008591	ATAD2B
circATAD2B_4	3	114783338	114791075	+	ENSSSCT00000009403	ENSSSCG00000008591	ATAD2B
circATE1_1	14	131560093	131576631	-	ENSSSCT00000011705	ENSSSCG00000010699	ATE1
circATE1_2	14	131556703	131576631	-	ENSSSCT00000011705	ENSSSCG00000010699	ATE1
circATF6	4	88723351	88740487	-	ENSSSCT00000043085	ENSSSCG00000006346	ATF6
circATF7IP	5	58079140	58083307	-	ENSSSCT00000061398	ENSSSCG00000000612	ATF7IP
circATG10	2	90580650	90594124	+	ENSSSCT00000024808	ENSSSCG00000025210	ATG10
circATG2B_1	7	117563655	117564011	-	ENSSSCT00000057140	ENSSSCG00000002502	ATG2B
circATG2B_2	7	117563655	117571020	-	ENSSSCT00000057140	ENSSSCG00000002502	ATG2B
circATL3	2	8388247	8390219	+	ENSSSCT00000041510	ENSSSCG00000013054	ATL3
circATM	9	36698684	36715744	+	ENSSSCT00000028051	ENSSSCG00000025606	ATM
circATP10D	8	37441276	37445470	+	ENSSSCT00000052245	ENSSSCG00000008812	ATP10D
circATP11A_1	11	78382355	78383968	+	ENSSSCT00000053574	ENSSSCG00000037561	ATP11A
circATP11A_2	11	78349881	78352808	+	ENSSSCT00000053574	ENSSSCG00000037561	ATP11A
circATP11B_1	13	120756799	120765156	+	ENSSSCT00000050824	ENSSSCG00000011772	ATP11B
circATP11B_2	13	120778215	120779879	+	ENSSSCT00000050824	ENSSSCG00000011772	ATP11B
circATP11C	X	114479111	114492023	-	ENSSSCT00000036522	ENSSSCG00000012713	ATP11C
circATP13A3_1	13	131451617	131453736	-	ENSSSCT00000012937	ENSSSCG00000011825	ATP13A3
circATP13A3_2	13	131451617	131452941	-	ENSSSCT00000012937	ENSSSCG00000011825	ATP13A3
circATP13A4_1	13	130516812	130528924	-	ENSSSCT00000012933	ENSSSCG00000011821	ATP13A4
circATP13A4_2	13	130504722	130528924	-	ENSSSCT00000012933	ENSSSCG00000011821	ATP13A4
circATP2C1	13	1529652	1540269	-	ENSSSCT00000012246	ENSSSCG00000011183	ATP2C1
circATP6V0A2	14	29281863	29290551	-	ENSSSCT00000010708	ENSSSCG00000009766	ATP6V0A2
circATP6V1C1	4	34047035	34055774	-	ENSSSCT00000006643	ENSSSCG00000006054	ATP6V1C1
circATP8B1	1	163026218	163042228	+	ENSSSCT00000047926	ENSSSCG00000004921	ATP8B1
circATP8B4	1	121731740	121738042	+	ENSSSCT00000005131	ENSSSCG00000004646	ATP8B4
circATP9A	17	53037003	53043217	-	ENSSSCT00000008185	ENSSSCG00000007478	ATP9A
circATPAF2	12	60626544	60631580	+	ENSSSCT00000029362	ENSSSCG00000028712	ATPAF2
circATRNL1	14	125707565	125716203	+	ENSSSCT00000032203	ENSSSCG00000010654	ATRNL1
circATRX_1	X	61720718	61746482	-	ENSSSCT00000013595	ENSSSCG00000012434	ATRX
circATRX_2	X	61720718	61735982	-	ENSSSCT00000013595	ENSSSCG00000012434	ATRX
circATXN10	5	3717599	3729566	-	ENSSSCT00000032275	ENSSSCG00000024864	ATXN10
circATXN2L	3	18512813	18513266	+	ENSSSCT00000063630	ENSSSCG00000021845	ATXN2L
circAVL9_1	18	40696218	40697513	-	ENSSSCT00000029825	ENSSSCG00000023445	AVL9
circAVL9_2	18	40675471	40685458	-	ENSSSCT00000029825	ENSSSCG00000023445	AVL9
circAVL9_3	18	40696218	40710541	-	ENSSSCT00000029825	ENSSSCG00000023445	AVL9
circAZIN1_1	4	34250049	34254131	+	ENSSSCT00000024569	ENSSSCG00000023873	AZIN1
circAZIN1_2	4	34250049	34251517	+	ENSSSCT00000024569	ENSSSCG00000023873	AZIN1
circBABAM2	3	110991213	110997758	-	ENSSSCT00000060193	ENSSSCG00000026465	BABAM2
circBAG1	10	33229550	33237248	+	ENSSSCT00000012037	ENSSSCG00000010996	BAG1
circBAZ2B_1	15	66331267	66357727	-	ENSSSCT00000017293	ENSSSCG00000015882	BAZ2B
circBAZ2B_2	15	66292954	66299872	-	ENSSSCT00000017293	ENSSSCG00000015882	BAZ2B
circBAZ2B_3	15	66291709	66299872	-	ENSSSCT00000017293	ENSSSCG00000015882	BAZ2B
circBAZ2B_4	15	66364781	66377542	-	ENSSSCT00000017293	ENSSSCG00000015882	BAZ2B
circBAZ2B_5	15	66267153	66299872	-	ENSSSCT00000017293	ENSSSCG00000015882	BAZ2B
circBAZ2B_6	15	66325872	66357727	-	ENSSSCT00000017293	ENSSSCG00000015882	BAZ2B
circBAZ2B_7	15	66340957	66357727	-	ENSSSCT00000017293	ENSSSCG00000015882	BAZ2B
circBBS7	8	102220723	102226105	+	ENSSSCT00000065035	ENSSSCG00000009093	BBS7
circBBX	13	151811868	151818699	-	ENSSSCT00000061993	ENSSSCG00000011943	BBX
circBCL11A	3	81204940	81205270	+	ENSSSCT00000009189	ENSSSCG00000008392	BCL11A
circBDP1_1	16	47810329	47817069	+	ENSSSCT00000018477	ENSSSCG00000016968	BDP1
circBDP1_2	16	47810329	47814614	+	ENSSSCT00000018477	ENSSSCG00000016968	BDP1
circBEND7	10	48206020	48213577	+	ENSSSCT00000043135	ENSSSCG00000032984	BEND7
circBICRAL	7	37902521	37904204	+	ENSSSCT00000044198	ENSSSCG00000001646	BICRAL
circBIRC6_1	3	107146964	107147569	-	ENSSSCT00000009316	ENSSSCG00000008513	BIRC6
circBIRC6_2	3	107198688	107217077	-	ENSSSCT00000009316	ENSSSCG00000008513	BIRC6
circBIVM	11	71125628	71135931	+	ENSSSCT00000059859	ENSSSCG00000009534	BIVM
circBMP2K	8	138729747	138744340	-	ENSSSCT00000061139	ENSSSCG00000027722	BMP2K
circBMPR1A	14	87854601	87861103	+	ENSSSCT00000046751	ENSSSCG00000010360	BMPR1A
circBMPR1B	8	124583309	124594106	-	ENSSSCT00000028459	ENSSSCG00000029621	BMPR1B
circBMPR2_1	15	106074745	106076503	+	ENSSSCT00000034069	ENSSSCG00000016113	BMPR2
circBMPR2_2	15	106128743	106130023	+	ENSSSCT00000034069	ENSSSCG00000016113	BMPR2
circBRAF_1	18	9065916	9084316	+	ENSSSCT00000040418	ENSSSCG00000016494	BRAF
circBRAF_2	18	9065916	9118627	+	ENSSSCT00000036816	ENSSSCG00000016494	BRAF
circBRD4	2	62307778	62313757	+	ENSSSCT00000027972	ENSSSCG00000022227	BRD4
circBRD7	6	34513015	34516600	+	ENSSSCT00000028421	ENSSSCG00000021644	BRD7
circBRWD1_1	13	202796616	202807630	-	ENSSSCT00000025909	ENSSSCG00000021042	BRWD1
circBRWD1_2	13	202806711	202807630	-	ENSSSCT00000025909	ENSSSCG00000021042	BRWD1
circBRWD1_3	13	202806711	202808210	-	ENSSSCT00000025909	ENSSSCG00000021042	BRWD1
circBRWD1_4	13	202847710	202865302	-	ENSSSCT00000025909	ENSSSCG00000021042	BRWD1
circBRWD1_5	13	202865201	202875571	-	ENSSSCT00000025909	ENSSSCG00000021042	BRWD1
circBRWD1_6	13	202874106	202878755	-	ENSSSCT00000025909	ENSSSCG00000021042	BRWD1
circBTAF1_1	14	103551371	103564282	+	ENSSSCT00000029375	ENSSSCG00000010467	BTAF1
circBTAF1_2	14	103553552	103564282	+	ENSSSCT00000029375	ENSSSCG00000010467	BTAF1
circBTBD7	7	114673749	114675741	-	ENSSSCT00000002732	ENSSSCG00000002461	BTBD7
circC18orf25	1	95846714	95847499	+	ENSSSCT00000060349	ENSSSCG00000004500	C18orf25
circC2CD5	5	51097636	51112176	+	ENSSSCT00000061175	ENSSSCG00000000570	C2CD5
circC2orf42	3	72300369	72313890	+	ENSSSCT00000057430	ENSSSCG00000008332	C2orf42
circCACUL1	14	128729496	128730587	-	ENSSSCT00000036843	ENSSSCG00000038222	CACUL1
circCADM1	9	42702175	42714121	-	ENSSSCT00000039284	ENSSSCG00000031831	CADM1
circCADPS2_1	18	24717335	24748818	+	ENSSSCT00000055343	ENSSSCG00000016611	CADPS2
circCADPS2_2	18	24770998	24782593	+	ENSSSCT00000055343	ENSSSCG00000016611	CADPS2
circCANX_1	2	78892189	78893995	-	ENSSSCT00000041740	ENSSSCG00000014020	CANX
circCANX_2	2	78886397	78896781	-	ENSSSCT00000041740	ENSSSCG00000014020	CANX
circCAPN2_1	10	19806729	19813461	+	ENSSSCT00000022751	ENSSSCG00000029411	CAPN2
circCAPN2_2	10	19806729	19812293	+	ENSSSCT00000022751	ENSSSCG00000029411	CAPN2
circCAPZA1	4	107780244	107797178	-	ENSSSCT00000007421	ENSSSCG00000006775	CAPZA1
circCARF	15	106414677	106437731	+	ENSSSCT00000017548	ENSSSCG00000016117	CARF
circCASC4_1	1	127175567	127177694	-	ENSSSCT00000005183	ENSSSCG00000023996	CASC4
circCASC4_2	1	127195768	127196307	-	ENSSSCT00000005183	ENSSSCG00000023996	CASC4
circCAT	2	26502034	26518029	-	ENSSSCT00000044995	ENSSSCG00000013302	CAT
circCBFA2T2_1	17	37114408	37127180	+	ENSSSCT00000030451	ENSSSCG00000027410	CBFA2T2
circCBFA2T2_2	17	37114408	37122129	+	ENSSSCT00000027119	ENSSSCG00000027410	CBFA2T2
circCBL	9	46486909	46488853	+	ENSSSCT00000016481	ENSSSCG00000015115	CBL
circCBX1	12	24327240	24328063	-	ENSSSCT00000019083	ENSSSCG00000017529	CBX1
circCC2D2A	8	10889017	10894216	+	ENSSSCT00000009559	ENSSSCG00000008738	CC2D2A
circCCAR1	14	71852746	71853159	+	ENSSSCT00000063279	ENSSSCG00000010243	CCAR1
circCCAR1_1	14	71844194	71850773	+	ENSSSCT00000063279	ENSSSCG00000010243	CCAR1
circCCAR1_2	14	71850579	71853159	+	ENSSSCT00000063279	ENSSSCG00000010243	CCAR1
circCCAR1_3	14	71844194	71853159	+	ENSSSCT00000063279	ENSSSCG00000010243	CCAR1
circCCAR1_4	14	71844194	71857332	+	ENSSSCT00000063279	ENSSSCG00000010243	CCAR1
circCCAR1_5	14	71844194	71856260	+	ENSSSCT00000063279	ENSSSCG00000010243	CCAR1
circCCAR1_6	14	71844194	71867347	+	ENSSSCT00000063279	ENSSSCG00000010243	CCAR1
circCCDC149	8	18861487	18879156	-	ENSSSCT00000053427	ENSSSCG00000023001	CCDC149
circCCDC30_1	6	168831727	168843105	-	ENSSSCT00000058886	ENSSSCG00000003965	CCDC30
circCCDC30_2	6	168856046	168858417	-	ENSSSCT00000054287	ENSSSCG00000003965	CCDC30
circCCDC58	13	138162726	138169777	+	ENSSSCT00000030693	ENSSSCG00000025107	CCDC58
circCCDC66	13	38452832	38490204	+	ENSSSCT00000026637	ENSSSCG00000021439	CCDC66
circCCDC69	16	71795195	71799829	+	ENSSSCT00000063610	ENSSSCG00000040411	CCDC69
circCCT3_1	4	93738636	93750841	+	ENSSSCT00000045139	ENSSSCG00000006487	CCT3
circCCT3_2	4	93738636	93749340	+	ENSSSCT00000045139	ENSSSCG00000006487	CCT3
circCCT3_3	4	93738636	93747422	+	ENSSSCT00000045139	ENSSSCG00000006487	CCT3
circCCZ1	3	5208684	5219219	-	ENSSSCT00000028320	ENSSSCG00000025940	CCZ1
circCD46_1	9	135043204	135062148	-	ENSSSCT00000063618	ENSSSCG00000038506	CD46
circCD46_2	9	135048727	135062148	-	ENSSSCT00000054278	ENSSSCG00000038506	CD46
circCDC123	10	59745681	59752288	-	ENSSSCT00000012161	ENSSSCG00000011112	CDC123
circCDC42BPA	10	14786193	14794270	-	ENSSSCT00000052341	ENSSSCG00000010862	CDC42BPA
circCDCP1	13	28283985	28292368	-	ENSSSCT00000012368	ENSSSCG00000011298	CDCP1
circCDH1_1	6	18098038	18099295	-	ENSSSCT00000058692	ENSSSCG00000025652	CDH1
circCDH1_2	6	18079655	18081698	-	ENSSSCT00000058692	ENSSSCG00000025652	CDH1
circCDK12	12	22812394	22813863	-	ENSSSCT00000053602	ENSSSCG00000017504	CDK12
circCDK13_1	18	54393585	54404485	-	ENSSSCT00000018255	ENSSSCG00000016769	CDK13
circCDK13_2	18	54348425	54404485	-	ENSSSCT00000018255	ENSSSCG00000016769	CDK13
circCDK19	1	76723119	76750287	-	ENSSSCT00000059751	ENSSSCG00000037424	CDK19
circCDK8	11	4104217	4118265	+	ENSSSCT00000029736	ENSSSCG00000009298	CDK8
circCECR2	5	69698163	69699221	+	ENSSSCT00000000830	ENSSSCG00000000766	CECR2
circCENPC	8	65282755	65290009	-	ENSSSCT00000059921	ENSSSCG00000008921	CENPC
circCEP128_1	7	103654105	103691209	-	ENSSSCT00000037305	ENSSSCG00000002410	CEP128
circCEP128_2	7	103654105	103664878	-	ENSSSCT00000037305	ENSSSCG00000002410	CEP128
circCEP162_1	1	53396206	53413955	-	ENSSSCT00000004742	ENSSSCG00000004289	CEP162
circCEP162_2	1	53397626	53413955	-	ENSSSCT00000004742	ENSSSCG00000004289	CEP162
circCEP162_3	1	53409337	53413955	-	ENSSSCT00000004742	ENSSSCG00000004289	CEP162
circCEP295	9	26137741	26143371	+	ENSSSCT00000054502	ENSSSCG00000014946	CEP295
circCEP350_1	9	121610723	121617143	+	ENSSSCT00000016919	ENSSSCG00000015531	CEP350
circCEP350_2	9	121616520	121617143	+	ENSSSCT00000016919	ENSSSCG00000015531	CEP350
circCEP63	13	75615214	75652667	+	ENSSSCT00000024754	ENSSSCG00000011645	CEP63
circCFDP1_1	6	12234386	12252148	+	ENSSSCT00000038268	ENSSSCG00000033842	CFDP1
circCFDP1_2	6	12234386	12237082	+	ENSSSCT00000038268	ENSSSCG00000033842	CFDP1
circCHCHD6	13	73237138	73239444	-	ENSSSCT00000058716	ENSSSCG00000031557	CHCHD6
circCHD2_1	7	86024174	86032780	-	ENSSSCT00000061746	ENSSSCG00000002266	CHD2
circCHD2_2	7	86070323	86075222	-	ENSSSCT00000037867	ENSSSCG00000002266	CHD2
circCHD2_3	7	86081592	86087677	-	ENSSSCT00000037867	ENSSSCG00000002266	CHD2
circCHD2_4	7	86044905	86056387	-	ENSSSCT00000061746	ENSSSCG00000002266	CHD2
circCHD2_5	7	86044905	86087677	-	ENSSSCT00000037867	ENSSSCG00000002266	CHD2
circCHD7_1	4	72576153	72577564	-	ENSSSCT00000006828	ENSSSCG00000006231	CHD7
circCHD7_2	4	72630917	72643259	-	ENSSSCT00000006828	ENSSSCG00000006231	CHD7
circCHD7_3	4	72636560	72643259	-	ENSSSCT00000006828	ENSSSCG00000006231	CHD7
circCHD8	7	77769109	77771399	+	ENSSSCT00000002379	ENSSSCG00000002127	CHD8
circCHD9	6	31835305	31849452	-	ENSSSCT00000040052	ENSSSCG00000033591	CHD9
circCHP1	1	130089893	130103599	-	ENSSSCT00000044283	ENSSSCG00000004751	CHP1
circCHST15	14	133488930	133528266	-	ENSSSCT00000037178	ENSSSCG00000029482	CHST15
circCIDEA	6	97258336	97259361	-	ENSSSCT00000028648	ENSSSCG00000024644	CIDEA
circCIT	14	33051048	33052881	+	ENSSSCT00000010783	ENSSSCG00000009839	CIT
circCLASP1	15	29932360	29939777	+	ENSSSCT00000024092	ENSSSCG00000039157	CLASP1
circCLCC1	4	111084472	111090334	+	ENSSSCT00000048533	ENSSSCG00000006841	CLCC1
circCLEC16A	3	32047942	32085104	-	ENSSSCT00000035852	ENSSSCG00000026569	CLEC16A
circCLIC4	6	82442093	82462831	+	ENSSSCT00000043589	ENSSSCG00000038994	CLIC4
circCLIP1_1	14	30413533	30417971	+	ENSSSCT00000047921	ENSSSCG00000009793	CLIP1
circCLIP1_2	14	30369233	30371552	+	ENSSSCT00000047921	ENSSSCG00000009793	CLIP1
circCLK1	15	104555254	104557139	-	ENSSSCT00000017523	ENSSSCG00000016095	CLK1
circCLNS1A_1	9	12097453	12106836	-	ENSSSCT00000016235	ENSSSCG00000014881	CLNS1A
circCLNS1A_2	9	12104144	12106836	-	ENSSSCT00000016235	ENSSSCG00000014881	CLNS1A
circCLOCK	8	54838914	54855096	-	ENSSSCT00000048111	ENSSSCG00000008909	CLOCK
circCLPX	1	163184040	163189984	-	ENSSSCT00000005437	ENSSSCG00000004927	CLPX
circCMAS	5	51444400	51448377	-	ENSSSCT00000061365	ENSSSCG00000034733	CMAS
circCNDP1	1	149525671	149542825	-	ENSSSCT00000005375	ENSSSCG00000004869	CNDP1
circCNN2	2	77379616	77380927	-	ENSSSCT00000041973	ENSSSCG00000039542	CNN2
circCNOT11	3	53073337	53077591	-	ENSSSCT00000008944	ENSSSCG00000008167	CNOT11
circCNOT6L	8	73258404	73262907	-	ENSSSCT00000041786	ENSSSCG00000008989	CNOT6L
circCOBLL1	15	71385536	71408930	-	ENSSSCT00000048243	ENSSSCG00000025598	COBLL1
circCOG3_1	11	21791603	21805764	-	ENSSSCT00000061804	ENSSSCG00000023738	COG3
circCOG3_2	11	21789454	21805764	-	ENSSSCT00000061804	ENSSSCG00000023738	COG3
circCOG3_3	11	21786477	21789563	-	ENSSSCT00000061804	ENSSSCG00000023738	COG3
circCOG3_4	11	21797313	21805764	-	ENSSSCT00000061804	ENSSSCG00000023738	COG3
circCOG3_5	11	21804833	21808388	-	ENSSSCT00000061804	ENSSSCG00000023738	COG3
circCOG7	3	22810515	22822228	+	ENSSSCT00000011815	ENSSSCG00000010799	COG7
circCOP1_1	9	118014575	118041744	-	ENSSSCT00000066287	ENSSSCG00000015509	COP1
circCOP1_2	9	118068518	118074614	-	ENSSSCT00000066287	ENSSSCG00000015509	COP1
circCOPA_1	4	90161230	90163552	+	ENSSSCT00000006999	ENSSSCG00000006386	COPA
circCOPA_2	4	90161230	90171499	+	ENSSSCT00000006999	ENSSSCG00000006386	COPA
circCPEB2	8	10406165	10433424	+	ENSSSCT00000009556	ENSSSCG00000038410	CPEB2
circCPEB3	14	103704915	103728545	-	ENSSSCT00000056048	ENSSSCG00000010468	CPEB3
circCPEB4_1	16	50437614	50478728	-	ENSSSCT00000065962	ENSSSCG00000016981	CPEB4
circCPEB4_2	16	50437614	50446698	-	ENSSSCT00000065962	ENSSSCG00000016981	CPEB4
circCPM_1	5	33191267	33198920	-	ENSSSCT00000042730	ENSSSCG00000023630	CPM
circCPM_2	5	33191267	33214448	-	ENSSSCT00000042730	ENSSSCG00000023630	CPM
circCPNE3	4	50298371	50317215	-	ENSSSCT00000044483	ENSSSCG00000006135	CPNE3
circCRAMP1	3	40285328	40291060	-	ENSSSCT00000008795	ENSSSCG00000008026	CRAMP1
circCREB5	18	44166841	44186515	-	ENSSSCT00000018171	ENSSSCG00000016690	CREB5
circCREBBP_1	3	38413986	38414699	+	ENSSSCT00000008714	ENSSSCG00000007951	CREBBP
circCREBBP_2	3	38470923	38472523	+	ENSSSCT00000008714	ENSSSCG00000007951	CREBBP
circCREBBP_3	3	38483179	38484897	+	ENSSSCT00000008714	ENSSSCG00000007951	CREBBP
circCREBBP_4	3	38500630	38502398	+	ENSSSCT00000008714	ENSSSCG00000007951	CREBBP
circCREBRF_1	16	51162444	51183322	-	ENSSSCT00000018496	ENSSSCG00000016986	CREBRF
circCREBRF_2	16	51178125	51183322	-	ENSSSCT00000018496	ENSSSCG00000016986	CREBRF
circCREBRF_3	16	51168502	51171980	-	ENSSSCT00000018496	ENSSSCG00000016986	CREBRF
circCRIM1	3	103644871	103659383	-	ENSSSCT00000009306	ENSSSCG00000008504	CRIM1
circCRYBG1	1	72733010	72738156	+	ENSSSCT00000004832	ENSSSCG00000004371	CRYBG1
circCSDE1	4	105822617	105823970	+	ENSSSCT00000064093	ENSSSCG00000006752	CSDE1
circCSGALNACT2	14	61389330	61400625	+	ENSSSCT00000054679	ENSSSCG00000010200	CSGALNACT2
circCSN1S1_1	8	66894543	66895298	+	ENSSSCT00000010143	ENSSSCG00000009262	CSN1S1
circCSN1S1_2	8	66893147	66899068	+	ENSSSCT00000010143	ENSSSCG00000009262	CSN1S1
circCSN1S1_3	8	66889783	66895298	+	ENSSSCT00000010143	ENSSSCG00000009262	CSN1S1
circCSN1S1_4	8	66895274	66901077	+	ENSSSCT00000010143	ENSSSCG00000009262	CSN1S1
circCSN1S2_1	8	67001753	67002248	+	ENSSSCT00000010144	ENSSSCG00000009263	CSN1S2
circCSN1S2_2	8	67005245	67009131	+	ENSSSCT00000010144	ENSSSCG00000009263	CSN1S2
circCSN1S2_3	8	67005245	67008472	+	ENSSSCT00000010144	ENSSSCG00000009263	CSN1S2
circCSNK1G1	1	107763495	107763896	+	ENSSSCT00000063162	ENSSSCG00000004558	CSNK1G1
circCSNK1G2	2	76582776	76583208	-	ENSSSCT00000014689	ENSSSCG00000013445	CSNK1G2
circCSNK1G3	2	127051485	127082160	+	ENSSSCT00000015560	ENSSSCG00000014240	CSNK1G3
circCSNK2A1	17	34741780	34743068	+	ENSSSCT00000007882	ENSSSCG00000007203	CSNK2A1
circCSPP1	4	67698423	67722071	-	ENSSSCT00000063543	ENSSSCG00000006202	CSPP1
circCSPP1	4	67679792	67689219	-	ENSSSCT00000063543	ENSSSCG00000006202	CSPP1
circCTNNA1	2	140718297	140720559	+	ENSSSCT00000015666	ENSSSCG00000014339	CTNNA1
circCTSV	10	25205439	25206443	+	ENSSSCT00000051213	ENSSSCG00000011171	CTSV
circCUL3	15	126244847	126264510	-	ENSSSCT00000048139	ENSSSCG00000016234	CUL3
circCUL5	9	36495728	36499710	+	ENSSSCT00000029949	ENSSSCG00000029198	CUL5
circCYLD_1	6	34107265	34112786	-	ENSSSCT00000038560	ENSSSCG00000040286	CYLD
circCYLD_2	6	34078388	34080190	-	ENSSSCT00000039414	ENSSSCG00000040286	CYLD
circCYP51A1	9	72070654	72076914	-	ENSSSCT00000037678	ENSSSCG00000015311	CYP51A1
circDARS2	9	116111678	116120575	+	ENSSSCT00000016876	ENSSSCG00000015492	DARS2
circDCAF5	7	92778442	92785790	-	ENSSSCT00000040253	ENSSSCG00000039701	DCAF5
circDCAF6	4	83028285	83047297	-	ENSSSCT00000050818	ENSSSCG00000006303	DCAF6
circDCP2	2	116783861	116793088	-	ENSSSCT00000038180	ENSSSCG00000014204	DCP2
circDCUN1D1_1	13	120919102	120935351	-	ENSSSCT00000025068	ENSSSCG00000022783	DCUN1D1
circDCUN1D1_2	13	120931035	120935351	-	ENSSSCT00000025068	ENSSSCG00000022783	DCUN1D1
circDCUN1D4_1	8	39008496	39040610	+	ENSSSCT00000009666	ENSSSCG00000008831	DCUN1D4
circDCUN1D4_2	8	39008496	39032833	+	ENSSSCT00000009666	ENSSSCG00000008831	DCUN1D4
circDDHD1	1	182678726	182720865	-	ENSSSCT00000064162	ENSSSCG00000005043	DDHD1
circDDHD1	1	182688833	182720865	-	ENSSSCT00000064162	ENSSSCG00000005043	DDHD1
circDDHD2	15	48271059	48277942	-	ENSSSCT00000042693	ENSSSCG00000015818	DDHD2
circDDX1	3	121848911	121853120	-	ENSSSCT00000009430	ENSSSCG00000008619	DDX1
circDDX10	9	37048730	37055819	+	ENSSSCT00000016375	ENSSSCG00000015011	DDX10
circDDX17_1	5	9490199	9491469	+	ENSSSCT00000059784	ENSSSCG00000000104	DDX17
circDDX17_2	5	9493240	9494173	+	ENSSSCT00000059784	ENSSSCG00000000104	DDX17
circDDX27	17	50914045	50914419	+	ENSSSCT00000028964	ENSSSCG00000022915	DDX27
circDDX50_1	14	72000255	72004798	+	ENSSSCT00000011216	ENSSSCG00000010246	DDX50
circDDX50_2	14	71999542	72004798	+	ENSSSCT00000011216	ENSSSCG00000010246	DDX50
circDEK	7	13927361	13929874	-	ENSSSCT00000001170	ENSSSCG00000001075	DEK
circDENND1B_1	10	20438110	20481282	-	ENSSSCT00000042034	ENSSSCG00000010900	DENND1B
circDENND1B_2	10	20469602	20492105	-	ENSSSCT00000042034	ENSSSCG00000010900	DENND1B
circDENND1B_3	10	20455783	20492105	-	ENSSSCT00000042034	ENSSSCG00000010900	DENND1B
circDENND4C_1	1	203531905	203561227	-	ENSSSCT00000052325	ENSSSCG00000005170	DENND4C
circDENND4C_2	1	203531905	203537078	-	ENSSSCT00000052325	ENSSSCG00000005170	DENND4C
circDENND4C_3	1	203515104	203537078	-	ENSSSCT00000052325	ENSSSCG00000005170	DENND4C
circDENND6A	13	39467514	39471302	-	ENSSSCT00000026579	ENSSSCG00000011467	DENND6A
circDGKH	11	24857302	24858237	-	ENSSSCT00000055857	ENSSSCG00000009431	DGKH
circDHRSX	Y	5365520	5374873	-	ENSSSCT00000043060	ENSSSCG00000039144	DHRSX
circDHX36	13	94336122	94338366	-	ENSSSCT00000027576	ENSSSCG00000024916	DHX36
circDHX57	3	101473925	101480235	+	ENSSSCT00000027140	ENSSSCG00000008479	DHX57
circDICER1	7	116399250	116408577	-	ENSSSCT00000049913	ENSSSCG00000028225	DICER1
circDIMT1	16	41104363	41106467	-	ENSSSCT00000062892	ENSSSCG00000031990	DIMT1
circDIP2B	5	16483984	16512911	+	ENSSSCT00000047499	ENSSSCG00000029196	DIP2B
circDIP2C	10	68959423	68970531	+	ENSSSCT00000051140	ENSSSCG00000011163	DIP2C
circDISC1	14	58836338	58840822	-	ENSSSCT00000011136	ENSSSCG00000010170	DISC1
circDLD	9	107654483	107664436	+	ENSSSCT00000016824	ENSSSCG00000015443	DLD
circDLG1_1	13	132986163	133023430	+	ENSSSCT00000055575	ENSSSCG00000011833	DLG1
circDLG1_2	13	132960753	132975398	+	ENSSSCT00000055575	ENSSSCG00000011833	DLG1
circDLG1_3	13	132945575	132975398	+	ENSSSCT00000055575	ENSSSCG00000011833	DLG1
circDLG1_4	13	132915061	132945674	+	ENSSSCT00000055575	ENSSSCG00000011833	DLG1
circDLG1_5	13	133023315	133052271	+	ENSSSCT00000055575	ENSSSCG00000011833	DLG1
circDMXL1	2	123076247	123083549	+	ENSSSCT00000024571	ENSSSCG00000027857	DMXL1
circDNAJA1	10	33434992	33442076	-	ENSSSCT00000063153	ENSSSCG00000011000	DNAJA1
circDNAJB6	18	1475202	1481335	-	ENSSSCT00000060196	ENSSSCG00000033272	DNAJB6
circDNAJC1	10	52929649	52963179	+	ENSSSCT00000030126	ENSSSCG00000026001	DNAJC1
circDNAJC13	13	73619279	73631399	+	ENSSSCT00000055186	ENSSSCG00000011628	DNAJC13
circDNAJC14	5	21267343	21267784	-	ENSSSCT00000000389	ENSSSCG00000000366	DNAJC14
circDNAJC16	6	74739073	74741562	+	ENSSSCT00000037494	ENSSSCG00000003464	DNAJC16
circDNAJC2	9	103339554	103341373	-	ENSSSCT00000016801	ENSSSCG00000015423	DNAJC2
circDOCK1_1	14	136635493	136660046	+	ENSSSCT00000050919	ENSSSCG00000035045	DOCK1
circDOCK1_2	14	136319809	136335070	+	ENSSSCT00000050919	ENSSSCG00000035045	DOCK1
circDOCK1_3	14	136258010	136271400	+	ENSSSCT00000050919	ENSSSCG00000035045	DOCK1
circDOCK1_4	14	136279165	136285139	+	ENSSSCT00000050919	ENSSSCG00000035045	DOCK1
circDOCK1_5	14	136389552	136412160	+	ENSSSCT00000050919	ENSSSCG00000035045	DOCK1
circDOCK1_6	14	136678728	136684752	+	ENSSSCT00000050919	ENSSSCG00000035045	DOCK1
circDOCK11	X	97116669	97120352	+	ENSSSCT00000013815	ENSSSCG00000012634	DOCK11
circDOCK4	18	33663764	33673693	+	ENSSSCT00000052746	ENSSSCG00000025602	DOCK4
circDTNB_1	3	113272702	113309553	+	ENSSSCT00000057606	ENSSSCG00000008576	DTNB
circDTNB_2	3	113272702	113324246	+	ENSSSCT00000057606	ENSSSCG00000008576	DTNB
circDTNB_3	3	113272702	113299665	+	ENSSSCT00000057606	ENSSSCG00000008576	DTNB
circDYSF	3	71177120	71179271	-	ENSSSCT00000009103	ENSSSCG00000008312	DYSF
circECH1	6	47637795	47638219	-	ENSSSCT00000045996	ENSSSCG00000028943	ECH1
circECPAS	1	252271581	252280307	-	ENSSSCT00000006004	ENSSSCG00000005459	ECPAS
circEDC3	7	58850362	58868520	+	ENSSSCT00000041525	ENSSSCG00000001903	EDC3
circEED_1	9	20136919	20144395	+	ENSSSCT00000044568	ENSSSCG00000014915	EED
circEED_2	9	20130904	20139090	+	ENSSSCT00000044568	ENSSSCG00000014915	EED
circEED_3	9	20133606	20144395	+	ENSSSCT00000044568	ENSSSCG00000014915	EED
circEFL1_1	7	50861194	50876100	-	ENSSSCT00000002008	ENSSSCG00000001792	EFL1
circEFL1_2	7	50941923	50946333	-	ENSSSCT00000002008	ENSSSCG00000001792	EFL1
circEGFR	9	139437251	139438339	+	ENSSSCT00000023216	ENSSSCG00000022126	EGFR
circEHBP1_1	3	79005675	79011131	-	ENSSSCT00000061355	ENSSSCG00000008372	EHBP1
circEHBP1_2	3	78952889	78971884	-	ENSSSCT00000061355	ENSSSCG00000008372	EHBP1
circEIF2AK1_1	3	5090409	5097362	+	ENSSSCT00000008332	ENSSSCG00000007592	EIF2AK1
circEIF2AK1_2	3	5097261	5103939	+	ENSSSCT00000008332	ENSSSCG00000007592	EIF2AK1
circEIF2AK4	1	131326819	131340853	-	ENSSSCT00000038114	ENSSSCG00000039061	EIF2AK4
circEIF3A_1	14	128973894	128975267	-	ENSSSCT00000042252	ENSSSCG00000010679	EIF3A
circEIF3A_2	14	128984922	128989261	-	ENSSSCT00000042252	ENSSSCG00000010679	EIF3A
circEIF4E3	13	53090588	53106944	-	ENSSSCT00000050841	ENSSSCG00000011516	EIF4E3
circELF2	8	87799382	87820356	+	ENSSSCT00000044832	ENSSSCG00000029920	ELF2
circELL2_1	2	102535640	102539766	-	ENSSSCT00000054141	ENSSSCG00000014168	ELL2
circELL2_2	2	102535640	102536007	-	ENSSSCT00000054141	ENSSSCG00000014168	ELL2
circELP1	1	249962771	249971713	+	ENSSSCT00000056556	ENSSSCG00000005441	ELP1
circEMC2	4	29038356	29068902	-	ENSSSCT00000006621	ENSSSCG00000006032	EMC2
circEML4	3	98047437	98064327	-	ENSSSCT00000043652	ENSSSCG00000008467	EML4
circEML6	3	86297987	86298417	-	ENSSSCT00000028655	ENSSSCG00000026559	EML6
circEMSY_1	9	10684936	10690581	+	ENSSSCT00000062543	ENSSSCG00000014868	EMSY
circEMSY_2	9	10636305	10647784	+	ENSSSCT00000062543	ENSSSCG00000014868	EMSY
circENOPH1	8	135780980	135786172	-	ENSSSCT00000010126	ENSSSCG00000009246	ENOPH1
circEPCAM	3	93174831	93179511	-	ENSSSCT00000061463	ENSSSCG00000008429	EPCAM
circEPN2_1	12	60182782	60184718	-	ENSSSCT00000054551	ENSSSCG00000040457	EPN2
circEPN2_2	12	60175881	60184718	-	ENSSSCT00000054551	ENSSSCG00000040457	EPN2
circEPS15_1	6	160699488	160720786	+	ENSSSCT00000042554	ENSSSCG00000003872	EPS15
circEPS15_2	6	160712468	160720786	+	ENSSSCT00000042554	ENSSSCG00000003872	EPS15
circERBB2	12	22606822	22607386	-	ENSSSCT00000019050	ENSSSCG00000017497	ERBB2
circERBIN_1	16	44513269	44517349	+	ENSSSCT00000035098	ENSSSCG00000016954	ERBIN
circERBIN_2	16	44513269	44525240	+	ENSSSCT00000035098	ENSSSCG00000016954	ERBIN
circERC1	5	68310429	68329034	+	ENSSSCT00000039249	ENSSSCG00000000755	ERC1
circERCC6L2	10	26180873	26195694	-	ENSSSCT00000052054	ENSSSCG00000010941	ERCC6L2
circERI3_1	6	166989366	167024441	+	ENSSSCT00000037476	ENSSSCG00000036909	ERI3
circERI3_2	6	166989366	167000612	+	ENSSSCT00000037476	ENSSSCG00000036909	ERI3
circERI3_3	6	166971304	167000612	+	ENSSSCT00000037476	ENSSSCG00000036909	ERI3
circERI3_4	6	166989366	167058954	+	ENSSSCT00000037476	ENSSSCG00000036909	ERI3
circERLEC1_1	3	87369570	87371772	-	ENSSSCT00000037232	ENSSSCG00000008414	ERLEC1
circERLEC1_2	3	87369570	87380823	-	ENSSSCT00000051288	ENSSSCG00000008414	ERLEC1
circERO1B	14	55065405	55077074	+	ENSSSCT00000011111	ENSSSCG00000010148	ERO1B
circERP44	1	241809452	241824281	-	ENSSSCT00000052989	ENSSSCG00000040634	ERP44
circESCO1_1	6	106730356	106771048	-	ENSSSCT00000004099	ENSSSCG00000003700	ESCO1
circESCO1_2	6	106750397	106771048	-	ENSSSCT00000004099	ENSSSCG00000003700	ESCO1
circESCO1_3	6	106710154	106752875	-	ENSSSCT00000004099	ENSSSCG00000003700	ESCO1
circESR1	1	14416334	14457143	-	ENSSSCT00000035147	ENSSSCG00000025777	ESR1
circETFA	7	56509178	56519340	-	ENSSSCT00000042105	ENSSSCG00000001862	ETFA
circEVI5_1	4	124468316	124488165	+	ENSSSCT00000025428	ENSSSCG00000006901	EVI5
circEVI5_2	4	124520318	124539837	+	ENSSSCT00000025428	ENSSSCG00000006901	EVI5
circEVI5_3	4	124520318	124566870	+	ENSSSCT00000025428	ENSSSCG00000006901	EVI5
circEVL	7	121001607	121012600	+	ENSSSCT00000045698	ENSSSCG00000037105	EVL
circEXOC1	8	55210502	55211996	+	ENSSSCT00000031053	ENSSSCG00000023269	EXOC1
circEXOC2	7	229159	252991	-	ENSSSCT00000063927	ENSSSCG00000000985	EXOC2
circEXOC6B	3	70283523	70295087	+	ENSSSCT00000057848	ENSSSCG00000008310	EXOC6B
circEZH2_1	9	109421603	109431724	+	ENSSSCT00000050801	ENSSSCG00000028840	EZH2
circEZH2_2	9	109411981	109412809	+	ENSSSCT00000023706	ENSSSCG00000028840	EZH2
circEZH2_3	9	109411981	109431724	+	ENSSSCT00000023706	ENSSSCG00000028840	EZH2
circEZR	1	8434506	8444226	+	ENSSSCT00000004487	ENSSSCG00000004058	EZR
circF8	X	125315484	125320364	-	ENSSSCT00000035558	ENSSSCG00000012818	F8
circFADS3	2	9621697	9622824	+	ENSSSCT00000014290	ENSSSCG00000013073	FADS3
circFAM114A2	16	69126080	69133446	+	ENSSSCT00000018589	ENSSSCG00000017073	FAM114A2
circFAM117B	15	106233836	106246706	+	ENSSSCT00000017545	ENSSSCG00000016114	FAM117B
circFAM120A_1	3	42881921	42902838	+	ENSSSCT00000008852	ENSSSCG00000008079	FAM120A
circFAM120A_2	3	42881921	42887048	+	ENSSSCT00000008852	ENSSSCG00000008079	FAM120A
circFAM120B	1	128197	132692	-	ENSSSCT00000055371	ENSSSCG00000029697	FAM120B
circFAM120C	X	46871977	46878238	-	ENSSSCT00000040652	ENSSSCG00000035822	FAM120C
circFAM129A	9	126089735	126106525	-	ENSSSCT00000035845	ENSSSCG00000015567	FAM129A
circFAM13B	2	139964037	139964379	-	ENSSSCT00000041691	ENSSSCG00000029125	FAM13B
circFAM160B1	14	125184323	125188721	+	ENSSSCT00000011651	ENSSSCG00000010652	FAM160B1
circFAM208A_1	13	38531388	38545830	-	ENSSSCT00000048219	ENSSSCG00000024201	FAM208A
circFAM208A_2	13	38540107	38545830	-	ENSSSCT00000048219	ENSSSCG00000024201	FAM208A
circFAM208B_1	10	65244718	65247076	-	ENSSSCT00000045469	ENSSSCG00000011136	FAM208B
circFAM208B_2	10	65246552	65247076	-	ENSSSCT00000045469	ENSSSCG00000011136	FAM208B
circFAM228B_3	3	114562188	114573941	-	ENSSSCT00000037752	ENSSSCG00000008584	FAM228B
circFAM241A	8	110395464	110404477	-	ENSSSCT00000057782	ENSSSCG00000009128	FAM241A
circFANCL_1	3	83349427	83384802	+	ENSSSCT00000059199	ENSSSCG00000008394	FANCL
circFANCL_2	3	83349427	83358984	+	ENSSSCT00000059199	ENSSSCG00000008394	FANCL
circFARP1	11	67409532	67411878	+	ENSSSCT00000026699	ENSSSCG00000026863	FARP1
circFBXO11	3	92761994	92762903	+	ENSSSCT00000028062	ENSSSCG00000029485	FBXO11
circFBXO28	10	19949147	19952852	+	ENSSSCT00000032380	ENSSSCG00000024618	FBXO28
circFBXW4	14	112705126	112714985	-	ENSSSCT00000011558	ENSSSCG00000010566	FBXW4
circFCHO2_1	2	82117896	82137277	+	ENSSSCT00000026067	ENSSSCG00000022661	FCHO2
circFCHO2_2	2	82200379	82200981	+	ENSSSCT00000026067	ENSSSCG00000022661	FCHO2
circFCHSD2_1	9	7476477	7481586	-	ENSSSCT00000052721	ENSSSCG00000014820	FCHSD2
circFCHSD2_2	9	7476477	7491573	-	ENSSSCT00000052721	ENSSSCG00000014820	FCHSD2
circFCHSD2_3	9	7424585	7481586	-	ENSSSCT00000052721	ENSSSCG00000014820	FCHSD2
circFCHSD2_4	9	7373040	7380166	-	ENSSSCT00000052721	ENSSSCG00000014820	FCHSD2
circFCHSD2_5	9	7476477	7502740	-	ENSSSCT00000052721	ENSSSCG00000014820	FCHSD2
circFCHSD2_6	9	7397471	7417219	-	ENSSSCT00000052721	ENSSSCG00000014820	FCHSD2
circFDFT1	14	14998677	15001827	+	ENSSSCT00000052808	ENSSSCG00000026044	FDFT1
circFES	7	53476794	53477217	+	ENSSSCT00000002037	ENSSSCG00000001818	FES
circFGD4	5	41729703	41735315	-	ENSSSCT00000036458	ENSSSCG00000000530	FGD4
circFGFR1	15	48094738	48096210	+	ENSSSCT00000033078	ENSSSCG00000015815	FGFR1
circFHOD3	6	120469875	120482663	+	ENSSSCT00000025775	ENSSSCG00000027935	FHOD3
circFIG4_1	1	75718075	75731720	+	ENSSSCT00000031596	ENSSSCG00000004405	FIG4
circFIG4_2	1	75753868	75759232	+	ENSSSCT00000031596	ENSSSCG00000004405	FIG4
circFIP1L1_1	8	40166605	40198354	+	ENSSSCT00000044700	ENSSSCG00000031636	FIP1L1
circFIP1L1_2	8	40180317	40200697	+	ENSSSCT00000044700	ENSSSCG00000031636	FIP1L1
circFKBP8	2	59261729	59262716	+	ENSSSCT00000039332	ENSSSCG00000013905	FKBP8
circFLT1	11	5766387	5767129	-	ENSSSCT00000010212	ENSSSCG00000009320	FLT1
circFLVCR1_1	9	130549458	130564329	-	ENSSSCT00000016983	ENSSSCG00000015590	FLVCR1
circFLVCR1_2	9	130557241	130564329	-	ENSSSCT00000016983	ENSSSCG00000015590	FLVCR1
circFNBP1L	4	123704640	123731130	-	ENSSSCT00000054664	ENSSSCG00000006894	FNBP1L
circFNDC3B_1	13	110913571	110916337	+	ENSSSCT00000042601	ENSSSCG00000011752	FNDC3B
circFNDC3B_2	13	110784614	110789120	+	ENSSSCT00000042601	ENSSSCG00000011752	FNDC3B
circFNIP1_1	2	133976285	133983650	-	ENSSSCT00000060769	ENSSSCG00000014269	FNIP1
circFNIP1_2	2	134015624	134034219	-	ENSSSCT00000060769	ENSSSCG00000014269	FNIP1
circFNIP1_3	2	134016972	134034219	-	ENSSSCT00000060769	ENSSSCG00000014269	FNIP1
circFNIP2	8	47793836	47801426	+	ENSSSCT00000052111	ENSSSCG00000031175	FNIP2
circFOPNL	3	6981005	6988833	+	ENSSSCT00000037511	ENSSSCG00000033377	FOPNL
circFOXK2_1	12	573170	585916	-	ENSSSCT00000018643	ENSSSCG00000017125	FOXK2
circFOXK2_2	12	580547	585916	-	ENSSSCT00000018643	ENSSSCG00000017125	FOXK2
circFOXN2_3	3	92283613	92299786	-	ENSSSCT00000025707	ENSSSCG00000029593	FOXN2
circFOXO3	1	74737036	74738472	+	ENSSSCT00000038875	ENSSSCG00000004387	FOXO3
circFOXP1	13	52433335	52446046	-	ENSSSCT00000053905	ENSSSCG00000027675	FOXP1
circFTO_1	6	31388853	31404916	-	ENSSSCT00000038045	ENSSSCG00000035949	FTO
circFTO_2	6	31388853	31427802	-	ENSSSCT00000038045	ENSSSCG00000035949	FTO
circFTO_3	6	31396464	31404916	-	ENSSSCT00000038045	ENSSSCG00000035949	FTO
circFTO_4	6	31388853	31396608	-	ENSSSCT00000038045	ENSSSCG00000035949	FTO
circGALNT11	18	5314026	5326209	-	ENSSSCT00000061923	ENSSSCG00000016430	GALNT11
circGAN	6	6946244	6949483	-	ENSSSCT00000002983	ENSSSCG00000002690	GAN
circGANC	1	129062736	129078630	-	ENSSSCT00000038501	ENSSSCG00000004729	GANC
circGATAD2A	2	58456861	58478376	-	ENSSSCT00000015224	ENSSSCG00000013938	GATAD2A
circGCA	15	69042225	69046083	+	ENSSSCT00000031337	ENSSSCG00000027472	GCA
circGDI2_1	10	65174466	65191886	+	ENSSSCT00000012189	ENSSSCG00000011137	GDI2
circGDI2_2	10	65179074	65191886	+	ENSSSCT00000012189	ENSSSCG00000011137	GDI2
circGFPT1	3	73046114	73053892	+	ENSSSCT00000053007	ENSSSCG00000008339	GFPT1
circGGNBP2_1	12	38083732	38093378	+	ENSSSCT00000019252	ENSSSCG00000017688	GGNBP2
circGGNBP2_2	12	38103105	38109151	+	ENSSSCT00000019252	ENSSSCG00000017688	GGNBP2
circGIGYF2_1	15	133258866	133268029	+	ENSSSCT00000057947	ENSSSCG00000016291	GIGYF2
circGIGYF2_2	15	133217293	133218757	+	ENSSSCT00000057947	ENSSSCG00000016291	GIGYF2
circGIGYF2_3	15	133280527	133283709	+	ENSSSCT00000057947	ENSSSCG00000016291	GIGYF2
circGMDS	7	1193307	1198494	-	ENSSSCT00000001084	ENSSSCG00000000994	GMDS
circGNB1_1	6	63885768	63893464	-	ENSSSCT00000025244	ENSSSCG00000021890	GNB1
circGNB1_2	6	63879632	63893464	-	ENSSSCT00000025244	ENSSSCG00000021890	GNB1
circGNL3	13	34824029	34825924	+	ENSSSCT00000012529	ENSSSCG00000011449	GNL3
circGNPTAB_1	5	82403729	82422198	+	ENSSSCT00000000941	ENSSSCG00000000862	GNPTAB
circGNPTAB_2	5	82416125	82436342	+	ENSSSCT00000000941	ENSSSCG00000000862	GNPTAB
circGOLGB1	13	138817189	138819104	+	ENSSSCT00000012998	ENSSSCG00000011882	GOLGB1
circGOLPH3	16	18379578	18387297	-	ENSSSCT00000051198	ENSSSCG00000031705	GOLPH3
circGOLPH3L	4	98500780	98502211	+	ENSSSCT00000007286	ENSSSCG00000038558	GOLPH3L
circGON4L	4	94216681	94220967	+	ENSSSCT00000029338	ENSSSCG00000006510	GON4L
circGPAM	14	122553096	122561535	-	ENSSSCT00000011627	ENSSSCG00000010631	GPAM
circGPBP1_1	16	36278272	36285749	+	ENSSSCT00000047569	ENSSSCG00000016922	GPBP1
circGPBP1_2	16	36258139	36269888	+	ENSSSCT00000018429	ENSSSCG00000016922	GPBP1
circGPBP1_3	16	36266988	36269888	+	ENSSSCT00000018429	ENSSSCG00000016922	GPBP1
circGPBP1_4	16	36266988	36285749	+	ENSSSCT00000047569	ENSSSCG00000016922	GPBP1
circGPHN_1	7	90698517	90751496	+	ENSSSCT00000041451	ENSSSCG00000002285	GPHN
circGPHN_2	7	90698517	90794467	+	ENSSSCT00000041451	ENSSSCG00000002285	GPHN
circGRAMD1C	13	146058077	146078858	-	ENSSSCT00000013038	ENSSSCG00000011915	GRAMD1C
circGRIPAP1	X	43052046	43052598	-	ENSSSCT00000042173	ENSSSCG00000021106	GRIPAP1
circGSPT1_1	3	31250807	31266844	+	ENSSSCT00000064690	ENSSSCG00000021118	GSPT1
circGSPT1_2	3	31255431	31258924	+	ENSSSCT00000064690	ENSSSCG00000021118	GSPT1
circGSPT1_3	3	31258830	31266844	+	ENSSSCT00000064690	ENSSSCG00000021118	GSPT1
circGSTCD	8	116014633	116022036	-	ENSSSCT00000010025	ENSSSCG00000023548	GSTCD
circGTF2I_1	3	11771883	11777751	+	ENSSSCT00000031896	ENSSSCG00000007721	GTF2I
circGTF2I_2	3	11731298	11733763	+	ENSSSCT00000031896	ENSSSCG00000007721	GTF2I
circGTF2I_3	3	11760553	11777751	+	ENSSSCT00000031896	ENSSSCG00000007721	GTF2I
circGTF2I_4	3	11771883	11782001	+	ENSSSCT00000031896	ENSSSCG00000007721	GTF2I
circGUF1	8	35170853	35172596	+	ENSSSCT00000048495	ENSSSCG00000008807	GUF1
circGULP1_1	15	93199515	93223292	+	ENSSSCT00000056007	ENSSSCG00000016033	GULP1
circGULP1_2	15	93205479	93243693	+	ENSSSCT00000056007	ENSSSCG00000016033	GULP1
circGULP1_3	15	93074444	93159114	+	ENSSSCT00000039708	ENSSSCG00000016033	GULP1
circGULP1_4	15	93199515	93243693	+	ENSSSCT00000056007	ENSSSCG00000016033	GULP1
circGULP1_5	15	93239179	93243693	+	ENSSSCT00000056007	ENSSSCG00000016033	GULP1
circGXYLT1_1	5	73372350	73387814	-	ENSSSCT00000038625	ENSSSCG00000031701	GXYLT1
circGXYLT1_2	5	73380413	73387814	-	ENSSSCT00000038625	ENSSSCG00000031701	GXYLT1
circH2AFY	2	137591762	137592492	-	ENSSSCT00000050898	ENSSSCG00000014307	H2AFY
circHADH	8	113967110	113982056	-	ENSSSCT00000049871	ENSSSCG00000009150	HADH
circHAT1	15	78065297	78070200	+	ENSSSCT00000017369	ENSSSCG00000015952	HAT1
circHDGFL3_1	7	51787242	51798842	+	ENSSSCT00000038154	ENSSSCG00000035432	HDGFL3
circHDGFL3_2	7	51782207	51792316	+	ENSSSCT00000038154	ENSSSCG00000035432	HDGFL3
circHDLBP	15	139967129	139977192	-	ENSSSCT00000049491	ENSSSCG00000016379	HDLBP
circHEATR3_1	6	34714333	34725179	-	ENSSSCT00000044682	ENSSSCG00000039577	HEATR3
circHEATR3_2	6	34734999	34747797	-	ENSSSCT00000044682	ENSSSCG00000039577	HEATR3
circHEATR3_3	6	34743078	34751712	-	ENSSSCT00000044682	ENSSSCG00000039577	HEATR3
circHECTD1	7	68401377	68402796	+	ENSSSCT00000002204	ENSSSCG00000001971	HECTD1
circHEG1	13	135317235	135317769	+	ENSSSCT00000012972	ENSSSCG00000011859	HEG1
circHERC1	1	108385211	108386218	+	ENSSSCT00000005038	ENSSSCG00000004561	HERC1
circHERC4	14	71219662	71239477	-	ENSSSCT00000047111	ENSSSCG00000038913	HERC4
circHERPUD2	18	38309525	38320787	+	ENSSSCT00000024969	ENSSSCG00000027389	HERPUD2
circHIBADH	18	44996262	45011080	+	ENSSSCT00000018176	ENSSSCG00000016695	HIBADH
circHIF1A	1	190648252	190649258	+	ENSSSCT00000005618	ENSSSCG00000005096	HIF1A
circHIPK2	18	10004184	10005271	+	ENSSSCT00000023629	ENSSSCG00000026733	HIPK2
circHIPK3	2	27649121	27650223	-	ENSSSCT00000014538	ENSSSCG00000013312	HIPK3
circHMCN1	9	126957681	126982274	+	ENSSSCT00000036953	ENSSSCG00000035595	HMCN1
circHMGXB3_1	2	151057064	151069641	+	ENSSSCT00000015786	ENSSSCG00000014440	HMGXB3
circHMGXB3_2	2	151068703	151069641	+	ENSSSCT00000015786	ENSSSCG00000014440	HMGXB3
circHSPD1	15	101367116	101371287	-	ENSSSCT00000022887	ENSSSCG00000016077	HSPD1
circHTT	8	1861463	1862708	+	ENSSSCT00000062412	ENSSSCG00000008697	HTT
circHUWE1_1	X	46314294	46315147	-	ENSSSCT00000013481	ENSSSCG00000012328	HUWE1
circHUWE1_2	X	46334486	46354249	-	ENSSSCT00000013481	ENSSSCG00000012328	HUWE1
circHUWE1_3	X	46401349	46410119	-	ENSSSCT00000013481	ENSSSCG00000012328	HUWE1
circIARS_1	3	42001402	42012685	-	ENSSSCT00000024941	ENSSSCG00000008068	IARS
circIARS_2	3	41951779	41952939	-	ENSSSCT00000027044	ENSSSCG00000008068	IARS
circIDE	14	104064307	104070594	-	ENSSSCT00000051615	ENSSSCG00000010470	IDE
circIDH2_1	7	55655838	55658193	-	ENSSSCT00000044124	ENSSSCG00000001852	IDH2
circIDH2_2	7	55659525	55661779	-	ENSSSCT00000044124	ENSSSCG00000001852	IDH2
circIFNGR2	13	197030437	197031113	+	ENSSSCT00000056522	ENSSSCG00000034378	IFNGR2
circIFT80	13	100053037	100066548	-	ENSSSCT00000060868	ENSSSCG00000011733	IFT80
circIFT88_1	11	1004166	1009902	+	ENSSSCT00000055597	ENSSSCG00000009270	IFT88
circIFT88_2	11	961506	983324	+	ENSSSCT00000055597	ENSSSCG00000009270	IFT88
circIGBP1	X	56182838	56188670	+	ENSSSCT00000032638	ENSSSCG00000012382	IGBP1
circIGF1R	1	137638040	137638586	-	ENSSSCT00000005311	ENSSSCG00000030560	IGF1R
circIGSF9	4	90556385	90557015	+	ENSSSCT00000007009	ENSSSCG00000006396	IGSF9
circIKBKB	17	11334759	11338631	+	ENSSSCT00000007699	ENSSSCG00000007030	IKBKB
circIL6ST_1	16	35116169	35123287	-	ENSSSCT00000034013	ENSSSCG00000016916	IL6ST
circIL6ST_2	16	35120232	35127635	-	ENSSSCT00000034013	ENSSSCG00000016916	IL6ST
circINO80	1	130233522	130278467	+	ENSSSCT00000005252	ENSSSCG00000004753	INO80
circINPP4B	8	85198192	85200429	+	ENSSSCT00000053332	ENSSSCG00000009050	INPP4B
circINPP5A	14	140791455	140855937	+	ENSSSCT00000011777	ENSSSCG00000010765	INPP5A
circINSIG1	18	2893548	2894947	-	ENSSSCT00000017880	ENSSSCG00000016420	INSIG1
circINTS10	17	12061715	12084564	-	ENSSSCT00000007672	ENSSSCG00000007004	INTS10
circINVS	1	241979931	242018942	+	ENSSSCT00000005931	ENSSSCG00000005388	INVS
circIPMK	14	92396505	92409653	+	ENSSSCT00000059058	ENSSSCG00000040863	IPMK
circIQGAP2_1	2	85594120	85597549	+	ENSSSCT00000015388	ENSSSCG00000014088	IQGAP2
circIQGAP2_2	2	85594120	85604438	+	ENSSSCT00000015388	ENSSSCG00000014088	IQGAP2
circISM1_1	17	22003312	22023699	+	ENSSSCT00000047051	ENSSSCG00000007073	ISM1
circISM1_2	17	22003312	22014862	+	ENSSSCT00000047051	ENSSSCG00000007073	ISM1
circITCH_1	17	37852423	37854328	+	ENSSSCT00000007965	ENSSSCG00000007280	ITCH
circITCH_2	17	37831733	37854328	+	ENSSSCT00000007965	ENSSSCG00000007280	ITCH
circITCH_3	17	37831733	37862678	+	ENSSSCT00000007965	ENSSSCG00000007280	ITCH
circITFG1	6	37201733	37204316	+	ENSSSCT00000041701	ENSSSCG00000033527	ITFG1
circITGAV	15	91678146	91684121	+	ENSSSCT00000035294	ENSSSCG00000016027	ITGAV
circITGB8	9	89383376	89400450	+	ENSSSCT00000050379	ENSSSCG00000015375	ITGB8
circITPR2_1	5	47098976	47114654	+	ENSSSCT00000023164	ENSSSCG00000000555	ITPR2
circITPR2_2	5	47048735	47055414	+	ENSSSCT00000023164	ENSSSCG00000000555	ITPR2
circITPR2_3	5	47308478	47319185	+	ENSSSCT00000023164	ENSSSCG00000000555	ITPR2
circITSN1_1	13	197347451	197366251	+	ENSSSCT00000027819	ENSSSCG00000024614	ITSN1
circITSN1_2	13	197347451	197381491	+	ENSSSCT00000027819	ENSSSCG00000024614	ITSN1
circJMJD1C_1	14	66664981	66666186	-	ENSSSCT00000053707	ENSSSCG00000010226	JMJD1C
circJMJD1C_2	14	66676019	66685419	-	ENSSSCT00000053707	ENSSSCG00000010226	JMJD1C
circJMY	2	88057794	88070008	+	ENSSSCT00000015415	ENSSSCG00000014112	JMY
circKANSL1	12	16953322	16954694	+	ENSSSCT00000051407	ENSSSCG00000017310	KANSL1
circKANSL1L_1	15	112808097	112896614	-	ENSSSCT00000025006	ENSSSCG00000022830	KANSL1L
circKANSL1L_2	15	112840120	112896614	-	ENSSSCT00000025006	ENSSSCG00000022830	KANSL1L
circKANSL1L_3	15	112895497	112896614	-	ENSSSCT00000025006	ENSSSCG00000022830	KANSL1L
circKANSL1L_4	15	112869862	112896614	-	ENSSSCT00000025006	ENSSSCG00000022830	KANSL1L
circKANSL3	3	56975158	56975594	+	ENSSSCT00000046365	ENSSSCG00000040434	KANSL3
circKARS	6	12062170	12063338	+	ENSSSCT00000041141	ENSSSCG00000002704	KARS
circKATNBL1_1	7	80343072	80346071	+	ENSSSCT00000002500	ENSSSCG00000002245	KATNBL1
circKATNBL1_2	7	80344260	80346071	+	ENSSSCT00000002500	ENSSSCG00000002245	KATNBL1
circKATNBL1_3	7	80345061	80346071	+	ENSSSCT00000002500	ENSSSCG00000002245	KATNBL1
circKCMF1	3	59631094	59636902	-	ENSSSCT00000009026	ENSSSCG00000008242	KCMF1
circKCTD9_1	14	9478894	9480356	-	ENSSSCT00000010582	ENSSSCG00000009652	KCTD9
circKCTD9_2	14	9497311	9498411	-	ENSSSCT00000010582	ENSSSCG00000009652	KCTD9
circKCTD9_3	14	9497311	9505715	-	ENSSSCT00000010582	ENSSSCG00000009652	KCTD9
circKCTD9_4	14	9478894	9498411	-	ENSSSCT00000010582	ENSSSCG00000009652	KCTD9
circKDM1A	6	80958368	80960170	+	ENSSSCT00000003922	ENSSSCG00000003531	KDM1A
circKDM2A	2	5291534	5292935	-	ENSSSCT00000022488	ENSSSCG00000029637	KDM2A
circKDM4B	2	73829181	73837640	-	ENSSSCT00000025153	ENSSSCG00000024570	KDM4B
circKDM4C	1	215256333	215266887	-	ENSSSCT00000056156	ENSSSCG00000005198	KDM4C
circKDM5A_1	5	67681765	67691844	-	ENSSSCT00000044526	ENSSSCG00000029464	KDM5A
circKDM5A_2	5	67681765	67688990	-	ENSSSCT00000044526	ENSSSCG00000029464	KDM5A
circKDM5A_3	5	67681765	67690214	-	ENSSSCT00000044526	ENSSSCG00000029464	KDM5A
circKDM5B_4	10	24795545	24799565	-	ENSSSCT00000011960	ENSSSCG00000010928	KDM5B
circKDM5B_5	10	24788310	24799565	-	ENSSSCT00000011960	ENSSSCG00000010928	KDM5B
circKDM7A_1	18	9651789	9652810	+	ENSSSCT00000017965	ENSSSCG00000016501	KDM7A
circKDM7A_2	18	9647841	9652810	+	ENSSSCT00000017965	ENSSSCG00000016501	KDM7A
circKIAA1217_1	10	50709413	50757421	-	ENSSSCT00000052151	ENSSSCG00000011075	KIAA1217
circKIAA1217_2	10	50751195	50757421	-	ENSSSCT00000052151	ENSSSCG00000011075	KIAA1217
circKIAA1217_3	10	50716561	50757421	-	ENSSSCT00000052151	ENSSSCG00000011075	KIAA1217
circKIAA2026_1	1	216148994	216177064	+	ENSSSCT00000005737	ENSSSCG00000005205	KIAA2026
circKIAA2026_2	1	216148994	216199042	+	ENSSSCT00000005737	ENSSSCG00000005205	KIAA2026
circKIF13A	7	13540391	13541706	-	ENSSSCT00000029912	ENSSSCG00000020858	KIF13A
circKIF21A	5	70958572	70964317	-	ENSSSCT00000053315	ENSSSCG00000000779	KIF21A
circKIF5B	10	42646860	42647382	-	ENSSSCT00000059788	ENSSSCG00000011027	KIF5B
circKIF5B	10	42670778	42672427	-	ENSSSCT00000059788	ENSSSCG00000011027	KIF5B
circKIN	10	63619893	63626141	+	ENSSSCT00000057280	ENSSSCG00000033095	KIN
circKLHL24_1	13	121576382	121596427	+	ENSSSCT00000037528	ENSSSCG00000011775	KLHL24
circKLHL24_2	13	121571993	121577363	+	ENSSSCT00000051700	ENSSSCG00000011775	KLHL24
circKMT2A	9	45784064	45786789	+	ENSSSCT00000030447	ENSSSCG00000023324	KMT2A
circKMT2C_1	18	5199557	5218220	+	ENSSSCT00000025866	ENSSSCG00000020663	KMT2C
circKMT2C_2	18	5103836	5109435	+	ENSSSCT00000025866	ENSSSCG00000020663	KMT2C
circKMT2C_3	18	5199557	5212308	+	ENSSSCT00000025866	ENSSSCG00000020663	KMT2C
circKMT2E_1	9	104960016	104965029	+	ENSSSCT00000038314	ENSSSCG00000029082	KMT2E
circKMT2E_2	9	104960016	104984915	+	ENSSSCT00000038314	ENSSSCG00000029082	KMT2E
circKMT2E_3	9	104970468	104971638	+	ENSSSCT00000038314	ENSSSCG00000029082	KMT2E
circKMT2E_4	9	104970468	104978823	+	ENSSSCT00000038314	ENSSSCG00000029082	KMT2E
circKMT2E_5	9	104977275	104978823	+	ENSSSCT00000038314	ENSSSCG00000029082	KMT2E
circKMT5B	2	4743316	4752017	+	ENSSSCT00000051185	ENSSSCG00000031459	KMT5B
circKPNA4	13	100189065	100205633	-	ENSSSCT00000046911	ENSSSCG00000031077	KPNA4
circKRIT1_1	9	72161162	72170034	-	ENSSSCT00000016686	ENSSSCG00000015313	KRIT1
circKRIT1_2	9	72153384	72160471	-	ENSSSCT00000016686	ENSSSCG00000015313	KRIT1
circKRT23	12	21537660	21540429	+	ENSSSCT00000026513	ENSSSCG00000024067	KRT23
circKTN1_1	1	184914187	184923633	+	ENSSSCT00000043033	ENSSSCG00000005060	KTN1
circKTN1_2	1	184914187	184920865	+	ENSSSCT00000043033	ENSSSCG00000005060	KTN1
circL3MBTL3	1	33271333	33278592	-	ENSSSCT00000065993	ENSSSCG00000004203	L3MBTL3
circLAPTM4B_1	4	38957344	38967502	-	ENSSSCT00000006674	ENSSSCG00000006083	LAPTM4B
circLAPTM4B_2	4	38961990	38967502	-	ENSSSCT00000006674	ENSSSCG00000006083	LAPTM4B
circLARP4	5	16309168	16328852	+	ENSSSCT00000000235	ENSSSCG00000028516	LARP4
circLARP4B_1	10	68671264	68688441	+	ENSSSCT00000044332	ENSSSCG00000011162	LARP4B
circLARP4B_2	10	68684613	68688441	+	ENSSSCT00000044332	ENSSSCG00000011162	LARP4B
circLASP1	12	23240962	23249145	-	ENSSSCT00000047041	ENSSSCG00000040642	LASP1
circLATS1	1	16307507	16307993	+	ENSSSCT00000004541	ENSSSCG00000004106	LATS1
circLDLR	2	69853255	69853745	+	ENSSSCT00000029210	ENSSSCG00000028512	LDLR
circLDLRAD3	2	25013230	25058523	-	ENSSSCT00000014519	ENSSSCG00000013294	LDLRAD3
circLIFR_1	16	23740868	23745763	-	ENSSSCT00000032662	ENSSSCG00000016850	LIFR
circLIFR_2	16	23735575	23745763	-	ENSSSCT00000032662	ENSSSCG00000016850	LIFR
circLIN54_1	8	135351175	135380045	+	ENSSSCT00000029534	ENSSSCG00000009242	LIN54
circLIN54_2	8	135346368	135358910	+	ENSSSCT00000029534	ENSSSCG00000009242	LIN54
circLMBR1_1	18	1875192	1908209	+	ENSSSCT00000052669	ENSSSCG00000016412	LMBR1
circLMBR1_2	18	1875192	1881411	+	ENSSSCT00000052669	ENSSSCG00000016412	LMBR1
circLMBR1L	5	15128141	15128884	-	ENSSSCT00000048063	ENSSSCG00000000189	LMBR1L
circLMBRD2	16	21446905	21451895	-	ENSSSCT00000037666	ENSSSCG00000016834	LMBRD2
circLMNTD1_1	5	48291754	48292702	+	ENSSSCT00000040126	ENSSSCG00000027144	LMNTD1
circLMNTD1_2	5	48247562	48254390	+	ENSSSCT00000040126	ENSSSCG00000027144	LMNTD1
circLMNTD1_3	5	48286452	48305846	+	ENSSSCT00000040126	ENSSSCG00000027144	LMNTD1
circLNX1	8	40275633	40276541	-	ENSSSCT00000024521	ENSSSCG00000008838	LNX1
circLOC110259338	2	67883950	67886169	-	ENSSSCT00000041592	ENSSSCG00000040763	LOC110259338
circLONP2_1	6	36440011	36457415	-	ENSSSCT00000003144	ENSSSCG00000023391	LONP2
circLONP2_2	6	36387419	36428949	-	ENSSSCT00000003144	ENSSSCG00000023391	LONP2
circLPGAT1	9	131464800	131475251	+	ENSSSCT00000060846	ENSSSCG00000015603	LPGAT1
circLPP	13	126204995	126205688	+	ENSSSCT00000023546	ENSSSCG00000011811	LPP
circLPXN	2	12565203	12565570	+	ENSSSCT00000031344	ENSSSCG00000021176	LPXN
circLRBA	8	78122832	78199258	+	ENSSSCT00000044347	ENSSSCG00000009021	LRBA
circLRCH1_1	11	20767275	20804630	-	ENSSSCT00000058056	ENSSSCG00000009408	LRCH1
circLRCH1_2	11	20710448	20719541	-	ENSSSCT00000058056	ENSSSCG00000009408	LRCH1
circLRCH3_1	13	134457402	134471156	+	ENSSSCT00000060622	ENSSSCG00000011854	LRCH3
circLRCH3_2	13	134515276	134527329	+	ENSSSCT00000060622	ENSSSCG00000011854	LRCH3
circLRP6_1	5	60269554	60276758	+	ENSSSCT00000039050	ENSSSCG00000000625	LRP6
circLRP6_2	5	60168450	60168844	+	ENSSSCT00000039050	ENSSSCG00000000625	LRP6
circLRP6_3	5	60241616	60249461	+	ENSSSCT00000039050	ENSSSCG00000000625	LRP6
circLRRC1	7	26873941	26906980	-	ENSSSCT00000001658	ENSSSCG00000001486	LRRC1
circLRRIQ3	6	138964558	138981411	+	ENSSSCT00000041712	ENSSSCG00000003784	LRRIQ3
circLSM14A_1	6	43867656	43870512	+	ENSSSCT00000055533	ENSSSCG00000002869	LSM14A
circLSM14A_2	6	43867656	43894306	+	ENSSSCT00000055533	ENSSSCG00000002869	LSM14A
circLSM14A_3	6	43879421	43894306	+	ENSSSCT00000055533	ENSSSCG00000002869	LSM14A
circLSM14A_4	6	43867656	43879544	+	ENSSSCT00000055533	ENSSSCG00000002869	LSM14A
circLTF	13	29428387	29431659	-	ENSSSCT00000030564	ENSSSCG00000029879	LTF
circLYRM7	2	133488824	133496034	+	ENSSSCT00000052533	ENSSSCG00000033213	LYRM7
circLYST	14	55549470	55553080	+	ENSSSCT00000033787	ENSSSCG00000010151	LYST
circMACC1	9	89141293	89162558	-	ENSSSCT00000049657	ENSSSCG00000024802	MACC1
circMACF1	6	95171602	95182054	+	ENSSSCT00000004050	ENSSSCG00000003654	MACF1
circMADD	2	15322374	15323114	-	ENSSSCT00000045192	ENSSSCG00000013235	MADD
circMAGI1_1	13	46987048	47002023	-	ENSSSCT00000012581	ENSSSCG00000011497	MAGI1
circMAGT1_2	X	61915167	61935991	-	ENSSSCT00000035022	ENSSSCG00000012435	MAGT1
circMALT1_3	1	162115330	162116033	-	ENSSSCT00000034163	ENSSSCG00000004917	MALT1
circMAP2K1_1	1	164420444	164422619	+	ENSSSCT00000036045	ENSSSCG00000004943	MAP2K1
circMAP3K1_2	16	35920100	35932866	+	ENSSSCT00000037558	ENSSSCG00000016918	MAP3K1
circMAP3K2_1	15	25128580	25143159	+	ENSSSCT00000030086	ENSSSCG00000030354	MAP3K2
circMAP3K2_2	15	25140314	25143159	+	ENSSSCT00000030086	ENSSSCG00000030354	MAP3K2
circMAP3K3	12	15287152	15288986	-	ENSSSCT00000042403	ENSSSCG00000024813	MAP3K3
circMAPK6_1	1	119735150	119740313	-	ENSSSCT00000041237	ENSSSCG00000004624	MAPK6
circMAPK6_2	1	119738114	119740313	-	ENSSSCT00000041237	ENSSSCG00000004624	MAPK6
circMAPKAP1_1	1	266309589	266312704	-	ENSSSCT00000060966	ENSSSCG00000029169	MAPKAP1
circMAPKAP1_2	1	266296453	266312704	-	ENSSSCT00000060966	ENSSSCG00000029169	MAPKAP1
circMARCH7_1	15	66675027	66683291	+	ENSSSCT00000017295	ENSSSCG00000015883	MARCH7
circMARCH7_2	15	66664433	66683291	+	ENSSSCT00000017295	ENSSSCG00000015883	MARCH7
circMARK1	10	10038503	10066131	+	ENSSSCT00000029833	ENSSSCG00000010825	MARK1
circMAST3	2	59680627	59681693	-	ENSSSCT00000051791	ENSSSCG00000013895	MAST3
circMAST4	16	45500363	45505169	+	ENSSSCT00000055508	ENSSSCG00000016956	MAST4
circMATR3_1	2	141219339	141222143	+	ENSSSCT00000048814	ENSSSCG00000014343	MATR3
circMATR3_2	2	141219339	141220554	+	ENSSSCT00000048814	ENSSSCG00000014343	MATR3
circMATR3_3	2	141219339	141223721	+	ENSSSCT00000048814	ENSSSCG00000014343	MATR3
circMBD5	15	3663026	3700621	-	ENSSSCT00000053338	ENSSSCG00000015667	MBD5
circMCCC1_1	13	120987444	121006776	-	ENSSSCT00000029315	ENSSSCG00000025942	MCCC1
circMCCC1_2	13	121052112	121059064	-	ENSSSCT00000029315	ENSSSCG00000025942	MCCC1
circMCMBP	14	129676705	129679211	-	ENSSSCT00000011689	ENSSSCG00000010688	MCMBP
circMDFIC	18	31065677	31102892	-	ENSSSCT00000018116	ENSSSCG00000021885	MDFIC
circMED14	X	36388348	36405619	-	ENSSSCT00000013396	ENSSSCG00000012250	MED14
circMED17	9	26197372	26203753	+	ENSSSCT00000047839	ENSSSCG00000014949	MED17
circMEF2A	1	138471132	138472413	+	ENSSSCT00000023102	ENSSSCG00000028771	MEF2A
circMEMO1	3	107609925	107636043	+	ENSSSCT00000047389	ENSSSCG00000008515	MEMO1
circMETTL9	3	23692699	23704670	-	ENSSSCT00000030167	ENSSSCG00000030373	METTL9
circMFAP1_1	1	127746551	127748761	+	ENSSSCT00000066231	ENSSSCG00000040383	MFAP1
circMFAP1_2	1	127746551	127748026	+	ENSSSCT00000066231	ENSSSCG00000040383	MFAP1
circMFSD14A	4	118066784	118069700	-	ENSSSCT00000007523	ENSSSCG00000006870	MFSD14A
circMFSD6	15	95042536	95044148	+	ENSSSCT00000046021	ENSSSCG00000016052	MFSD6
circMGA_1	1	129687075	129688206	-	ENSSSCT00000005236	ENSSSCG00000004739	MGA
circMGA_2	1	129651196	129662208	-	ENSSSCT00000005235	ENSSSCG00000004739	MGA
circMGAM2	18	7804594	7806657	-	ENSSSCT00000017951	ENSSSCG00000016487	MGAM2
circMIA2	1	169821468	169829760	+	ENSSSCT00000065104	ENSSSCG00000004983	MIA2
circMIB1_1	6	106936501	106978180	+	ENSSSCT00000025346	ENSSSCG00000025478	MIB1
circMIB1_2	6	106936501	106958839	+	ENSSSCT00000025346	ENSSSCG00000025478	MIB1
circMICU2	11	1455411	1463356	-	ENSSSCT00000054260	ENSSSCG00000024667	MICU2
circMINDY3_1	10	45992308	46027671	+	ENSSSCT00000012089	ENSSSCG00000011045	MINDY3
circMINDY3_2	10	45992308	46022353	+	ENSSSCT00000012089	ENSSSCG00000011045	MINDY3
circMINDY3_3	10	45992308	46006364	+	ENSSSCT00000012089	ENSSSCG00000011045	MINDY3
circMIPOL1	7	62714873	62737351	-	ENSSSCT00000043917	ENSSSCG00000039714	MIPOL1
circMIS18BP1_1	1	175422948	175443338	-	ENSSSCT00000005514	ENSSSCG00000004999	MIS18BP1
circMIS18BP1_2	1	175412140	175432656	-	ENSSSCT00000005514	ENSSSCG00000004999	MIS18BP1
circMKLN1_1	18	17598679	17629822	-	ENSSSCT00000060927	ENSSSCG00000016549	MKLN1
circMKLN1_2	18	17584477	17629822	-	ENSSSCT00000060927	ENSSSCG00000016549	MKLN1
circMLLT10_1	10	53197802	53202893	-	ENSSSCT00000064367	ENSSSCG00000011085	MLLT10
circMLLT10_2	10	53089611	53104147	-	ENSSSCT00000064367	ENSSSCG00000011085	MLLT10
circMLLT10_3	10	53169686	53202893	-	ENSSSCT00000064367	ENSSSCG00000011085	MLLT10
circMLLT3	1	202536296	202536998	+	ENSSSCT00000050425	ENSSSCG00000005166	MLLT3
circMNAT1_1	1	189746193	189769062	+	ENSSSCT00000005610	ENSSSCG00000005090	MNAT1
circMNAT1_2	1	189763514	189809078	+	ENSSSCT00000005610	ENSSSCG00000005090	MNAT1
circMOBKL3	15	101401681	101407822	+	ENSSSCT00000017507	ENSSSCG00000016079	MOBKL3
circMORC3_1	13	200017892	200020785	+	ENSSSCT00000013187	ENSSSCG00000012055	MORC3
circMORC3_2	13	200015259	200023406	+	ENSSSCT00000013187	ENSSSCG00000012055	MORC3
circMPHOSPH9	14	29695892	29710591	+	ENSSSCT00000025142	ENSSSCG00000009779	MPHOSPH9
circMPP6	18	47629572	47656999	-	ENSSSCT00000018198	ENSSSCG00000016717	MPP6
circMPZL1	4	83249067	83260866	-	ENSSSCT00000006911	ENSSSCG00000006306	MPZL1
circMRPL42	5	89644927	89656169	-	ENSSSCT00000064682	ENSSSCG00000030478	MRPL42
circMRPS35	5	45998638	46019433	-	ENSSSCT00000000590	ENSSSCG00000000547	MRPS35
circMRPS5	3	46142070	46151353	+	ENSSSCT00000008889	ENSSSCG00000008113	MRPS5
circMRS2	7	19265491	19273195	+	ENSSSCT00000048351	ENSSSCG00000001087	MRS2
circMSH3_1	2	89323269	89350868	+	ENSSSCT00000044915	ENSSSCG00000014126	MSH3
circMSH3_2	2	89359612	89384364	+	ENSSSCT00000044915	ENSSSCG00000014126	MSH3
circMSH3_3	2	89312693	89350868	+	ENSSSCT00000044915	ENSSSCG00000014126	MSH3
circMSRB3	5	29732022	29753021	+	ENSSSCT00000059229	ENSSSCG00000026004	MSRB3
circMTERF3	4	40379782	40395305	+	ENSSSCT00000006681	ENSSSCG00000006090	MTERF3
circMTFR1	4	68935649	68958236	-	ENSSSCT00000046248	ENSSSCG00000006219	MTFR1
circMTHFSD_1	6	2564304	2574166	+	ENSSSCT00000060531	ENSSSCG00000002660	MTHFSD
circMTHFSD_2	6	2564304	2569942	+	ENSSSCT00000060531	ENSSSCG00000002660	MTHFSD
circMTHFSD_3	6	2564304	2567229	+	ENSSSCT00000060531	ENSSSCG00000002660	MTHFSD
circMTM1_1	X	122348585	122354133	+	ENSSSCT00000037235	ENSSSCG00000012742	MTM1
circMTM1_2	X	122310311	122331263	+	ENSSSCT00000013931	ENSSSCG00000012742	MTM1
circMTMR14	13	65957291	65967418	+	ENSSSCT00000049813	ENSSSCG00000011546	MTMR14
circMTMR3	14	46985142	46993251	+	ENSSSCT00000045628	ENSSSCG00000009994	MTMR3
circMTMR6_1	11	3208398	3208876	-	ENSSSCT00000050960	ENSSSCG00000035119	MTMR6
circMTMR6_2	11	3193838	3208876	-	ENSSSCT00000050960	ENSSSCG00000035119	MTMR6
circMTOR	6	71295601	71299202	-	ENSSSCT00000049073	ENSSSCG00000003413	MTOR
circMTR_1	14	54611058	54623632	-	ENSSSCT00000011105	ENSSSCG00000010143	MTR
circMTR_2	14	54619238	54623632	-	ENSSSCT00000011105	ENSSSCG00000010143	MTR
circMTUS1	17	5444092	5451779	-	ENSSSCT00000058433	ENSSSCG00000040013	MTUS1
circMUC4_1	13	134233746	134234461	+	ENSSSCT00000012962	ENSSSCG00000011850	MUC4
circMUC4_2	13	134233746	134235907	+	ENSSSCT00000012962	ENSSSCG00000011850	MUC4
circMUT	7	43610580	43617387	-	ENSSSCT00000040446	ENSSSCG00000001732	MUT
circMYH11	3	7073430	7088481	+	ENSSSCT00000057164	ENSSSCG00000000146	MYH11
circMYO1B	15	95981214	95990609	+	ENSSSCT00000054157	ENSSSCG00000016061	MYO1B
circMYO5C	1	119487613	119500634	+	ENSSSCT00000005104	ENSSSCG00000004621	MYO5C
circMYO9A_1	1	169439748	169482865	-	ENSSSCT00000036741	ENSSSCG00000004979	MYO9A
circMYO9A_2	1	169503332	169559446	-	ENSSSCT00000036741	ENSSSCG00000004979	MYO9A
circMYO9A_3	1	169551754	169559446	-	ENSSSCT00000036741	ENSSSCG00000004979	MYO9A
circMYO9B_1	2	60487006	60497356	-	ENSSSCT00000037430	ENSSSCG00000013876	MYO9B
circMYO9B_2	2	60502167	60503198	-	ENSSSCT00000037430	ENSSSCG00000013876	MYO9B
circMYOF_1	14	104811484	104836946	-	ENSSSCT00000011464	ENSSSCG00000010476	MYOF
circMYOF_2	14	104795620	104796320	-	ENSSSCT00000011464	ENSSSCG00000010476	MYOF
circMYOF_3	14	104811484	104813682	-	ENSSSCT00000011464	ENSSSCG00000010476	MYOF
circMYOF_4	14	104790750	104805543	-	ENSSSCT00000011464	ENSSSCG00000010476	MYOF
circN4BP1	6	36163930	36170915	+	ENSSSCT00000003142	ENSSSCG00000002841	N4BP1
circN4BP2L2	11	8974450	8982801	-	ENSSSCT00000061265	ENSSSCG00000009341	N4BP2L2
circNAA15_1	8	87643219	87657343	-	ENSSSCT00000043966	ENSSSCG00000009061	NAA15
circNAA15_2	8	87643219	87644581	-	ENSSSCT00000043966	ENSSSCG00000009061	NAA15
circNAA15_3	8	87643219	87659118	-	ENSSSCT00000043966	ENSSSCG00000009061	NAA15
circNAA16	11	25563086	25589582	-	ENSSSCT00000057964	ENSSSCG00000009435	NAA16
circNAA35	10	29228247	29230143	-	ENSSSCT00000064297	ENSSSCG00000010956	NAA35
circNAA50	13	146211072	146212596	+	ENSSSCT00000064423	ENSSSCG00000011917	NAA50
circNAALADL2	13	113844577	113852783	+	ENSSSCT00000062119	ENSSSCG00000023871	NAALADL2
circNALCN_1	11	69776124	69794145	-	ENSSSCT00000037539	ENSSSCG00000038949	NALCN
circNALCN_2	11	69792526	69794145	-	ENSSSCT00000037539	ENSSSCG00000038949	NALCN
circNALCN_3	11	69792526	69837179	-	ENSSSCT00000037539	ENSSSCG00000038949	NALCN
circNARS_1	1	106923368	106924847	-	ENSSSCT00000064163	ENSSSCG00000004542	NARS
circNARS_2	1	106923368	106926988	-	ENSSSCT00000064163	ENSSSCG00000004542	NARS
circNBEA_1	11	11156484	11181394	+	ENSSSCT00000049957	ENSSSCG00000034348	NBEA
circNBEA_2	11	11160921	11181394	+	ENSSSCT00000049957	ENSSSCG00000034348	NBEA
circNBR1	12	19760213	19773891	-	ENSSSCT00000040257	ENSSSCG00000030211	NBR1
circNBR1	12	19765317	19768678	-	ENSSSCT00000040257	ENSSSCG00000030211	NBR1
circNCOA6	17	38164321	38173595	-	ENSSSCT00000007969	ENSSSCG00000007284	NCOA6
circNCOR1_1	12	59319171	59323398	+	ENSSSCT00000019634	ENSSSCG00000018039	NCOR1
circNCOR1_2	12	59319171	59331703	+	ENSSSCT00000019634	ENSSSCG00000018039	NCOR1
circNCOR1_3	12	59320433	59323398	+	ENSSSCT00000019634	ENSSSCG00000018039	NCOR1
circNCOR1_4	12	59320433	59331703	+	ENSSSCT00000019634	ENSSSCG00000018039	NCOR1
circNDEL1_1	12	53615199	53633146	+	ENSSSCT00000049254	ENSSSCG00000017986	NDEL1
circNDEL1_2	12	53612424	53633146	+	ENSSSCT00000049254	ENSSSCG00000017986	NDEL1
circNDFIP2_1	11	51531488	51540684	+	ENSSSCT00000010395	ENSSSCG00000009480	NDFIP2
circNDFIP2_2	11	51531488	51534900	+	ENSSSCT00000010395	ENSSSCG00000009480	NDFIP2
circNDFIP2_3	11	51531488	51554792	+	ENSSSCT00000010395	ENSSSCG00000009480	NDFIP2
circNDFIP2_4	11	51531488	51547197	+	ENSSSCT00000010395	ENSSSCG00000009480	NDFIP2
circNDFIP2_5	11	51531488	51551593	+	ENSSSCT00000010395	ENSSSCG00000009480	NDFIP2
circNDUFS1_1	15	109436410	109441836	-	ENSSSCT00000017559	ENSSSCG00000016127	NDUFS1
circNDUFS1_2	15	109428069	109441836	-	ENSSSCT00000017559	ENSSSCG00000016127	NDUFS1
circNDUFV2	6	98833465	98842928	-	ENSSSCT00000062415	ENSSSCG00000038826	NDUFV2
circNECTIN3	13	148517272	148534946	-	ENSSSCT00000034662	ENSSSCG00000011933	NECTIN3
circNEK1_1	14	20168414	20203263	+	ENSSSCT00000053967	ENSSSCG00000009714	NEK1
circNEK1_2	14	20270673	20282065	+	ENSSSCT00000053967	ENSSSCG00000009714	NEK1
circNEK4	13	34882054	34882541	-	ENSSSCT00000041332	ENSSSCG00000011446	NEK4
circNELFCD	17	59133155	59136271	+	ENSSSCT00000039266	ENSSSCG00000007521	NELFCD
circNF1_1	12	43673068	43691261	-	ENSSSCT00000019317	ENSSSCG00000017748	NF1
circNF1_2	12	43684481	43691261	-	ENSSSCT00000019317	ENSSSCG00000017748	NF1
circNFAT5	6	17352017	17362974	-	ENSSSCT00000045027	ENSSSCG00000002755	NFAT5
circNFATC3	6	28711466	28754026	+	ENSSSCT00000062417	ENSSSCG00000029578	NFATC3
circNFIB	1	208355017	208364542	+	ENSSSCT00000044141	ENSSSCG00000005190	NFIB
circNFIX	2	65978291	65980624	-	ENSSSCT00000044397	ENSSSCG00000013742	NFIX
circNFKB1_1	8	118427110	118428938	-	ENSSSCT00000038683	ENSSSCG00000030957	NFKB1
circNFKB1_2	8	118470356	118483348	-	ENSSSCT00000038683	ENSSSCG00000030957	NFKB1
circNFYC_1	6	170449953	170467296	-	ENSSSCT00000054619	ENSSSCG00000003976	NFYC
circNFYC_2	6	170449953	170456107	-	ENSSSCT00000054619	ENSSSCG00000003976	NFYC
circNFYC_3	6	170430998	170436961	-	ENSSSCT00000054619	ENSSSCG00000003976	NFYC
circNGLY1	13	12666410	12670563	-	ENSSSCT00000012280	ENSSSCG00000011214	NGLY1
circNIPBL	16	22257341	22258377	+	ENSSSCT00000060078	ENSSSCG00000016842	NIPBL
circNKAP	X	98262074	98263484	-	ENSSSCT00000013792	ENSSSCG00000012613	NKAP
circNKTR_1	13	26160700	26169083	+	ENSSSCT00000037714	ENSSSCG00000011284	NKTR
circNKTR_2	13	26163496	26169083	+	ENSSSCT00000037714	ENSSSCG00000011284	NKTR
circNOL10_1	3	125943042	125943717	+	ENSSSCT00000061079	ENSSSCG00000008635	NOL10
circNOL10_2	3	125933709	125943717	+	ENSSSCT00000061079	ENSSSCG00000008635	NOL10
circNONO	X	57305745	57307466	+	ENSSSCT00000046707	ENSSSCG00000023245	NONO
circNOS3	18	6223877	6224923	-	ENSSSCT00000050205	ENSSSCG00000016450	NOS3
circNOTCH2	4	101135601	101139235	+	ENSSSCT00000038464	ENSSSCG00000006709	NOTCH2
circNOTCH3	2	62389730	62392801	+	ENSSSCT00000029966	ENSSSCG00000025176	NOTCH3
circnovel_1	7	96458417	96461362	+	ENSSSCT00000032106	ENSSSCG00000028663	-
circnovel_2	9	33731307	33732436	+	ENSSSCT00000054964	ENSSSCG00000033937	-
circnovel_3	9	136962229	136972049	-	ENSSSCT00000017026	ENSSSCG00000015632	-
circnovel_4	13	83159180	83160799	-	ENSSSCT00000012784	ENSSSCG00000011678	-
circnovel_5	7	75145649	75146187	-	ENSSSCT00000048956	ENSSSCG00000002003	-
circNOX4	9	22646147	22690654	-	ENSSSCT00000033431	ENSSSCG00000014927	NOX4
circNPAT_1	9	36581947	36587073	-	ENSSSCT00000066034	ENSSSCG00000026959	NPAT
circNPAT_2	9	36565658	36567329	-	ENSSSCT00000066034	ENSSSCG00000026959	NPAT
circNPEPPS	12	23880445	23887038	+	ENSSSCT00000019067	ENSSSCG00000017513	NPEPPS
circNPLOC4	12	1255355	1259750	+	ENSSSCT00000046511	ENSSSCG00000024235	NPLOC4
circNR2C1	5	88253162	88273584	+	ENSSSCT00000000986	ENSSSCG00000000902	NR2C1
circNR3C2	8	80312231	80313990	+	ENSSSCT00000032998	ENSSSCG00000037766	NR3C2
circNRDC	6	160337787	160367307	+	ENSSSCT00000049354	ENSSSCG00000003870	NRDC
circNSD1_1	2	80702171	80715319	-	ENSSSCT00000061395	ENSSSCG00000014044	NSD1
circNSD1_2	2	80731219	80748514	-	ENSSSCT00000061395	ENSSSCG00000014044	NSD1
circNSUN6_1	10	44934035	44935556	-	ENSSSCT00000051292	ENSSSCG00000011041	NSUN6
circNSUN6_2	10	44928913	44935556	-	ENSSSCT00000051292	ENSSSCG00000011041	NSUN6
circNTRK2	10	30379836	30389167	-	ENSSSCT00000022743	ENSSSCG00000010959	NTRK2
circNUCB1	6	54200797	54201346	+	ENSSSCT00000054984	ENSSSCG00000003150	NUCB1
circNUCKS1_1	9	66406845	66413572	-	ENSSSCT00000030608	ENSSSCG00000022398	NUCKS1
circNUCKS1_2	9	66406845	66409132	-	ENSSSCT00000030608	ENSSSCG00000022398	NUCKS1
circNUCKS1_3	9	66405628	66409132	-	ENSSSCT00000030608	ENSSSCG00000022398	NUCKS1
circNUDT21	6	29344145	29357287	+	ENSSSCT00000036721	ENSSSCG00000034521	NUDT21
circNUP155_1	16	22524456	22528282	-	ENSSSCT00000060578	ENSSSCG00000016845	NUP155
circNUP155_2	16	22537234	22543376	-	ENSSSCT00000060578	ENSSSCG00000016845	NUP155
circNUP155_3	16	22571092	22576391	-	ENSSSCT00000060578	ENSSSCG00000016845	NUP155
circNUPL2	9	91991497	91992388	+	ENSSSCT00000027491	ENSSSCG00000023793	NUPL2
circNUS1	1	44163929	44171097	-	ENSSSCT00000030561	ENSSSCG00000020885	NUS1
circOAT	14	133814478	133818538	-	ENSSSCT00000053167	ENSSSCG00000010734	OAT
circODR4	9	127566655	127577646	+	ENSSSCT00000016970	ENSSSCG00000015577	ODR4
circODR4	9	127561943	127566841	+	ENSSSCT00000016970	ENSSSCG00000015577	ODR4
circOGA_1	14	112836924	112838173	-	ENSSSCT00000038930	ENSSSCG00000010569	OGA
circOGA_2	14	112836924	112844150	-	ENSSSCT00000038930	ENSSSCG00000010569	OGA
circOPHN1	X	54286535	54293347	-	ENSSSCT00000033803	ENSSSCG00000022676	OPHN1
circORC4	15	4136903	4150279	+	ENSSSCT00000046525	ENSSSCG00000015668	ORC4
circOSBPL1A	6	109117106	109150901	-	ENSSSCT00000004111	ENSSSCG00000003712	OSBPL1A
circOSBPL9_1	6	160413188	160415719	-	ENSSSCT00000053356	ENSSSCG00000021292	OSBPL9
circOSBPL9_2	6	160415614	160432760	-	ENSSSCT00000053356	ENSSSCG00000021292	OSBPL9
circOSBPL9_3	6	160413188	160417430	-	ENSSSCT00000053356	ENSSSCG00000021292	OSBPL9
circOSGIN2	4	46892869	46905852	-	ENSSSCT00000033694	ENSSSCG00000021184	OSGIN2
circOTUD4_1	8	83254666	83268011	+	ENSSSCT00000009902	ENSSSCG00000009042	OTUD4
circOTUD4_2	8	83276932	83280342	+	ENSSSCT00000009902	ENSSSCG00000009042	OTUD4
circOTUD4_3	8	83267615	83268011	+	ENSSSCT00000009902	ENSSSCG00000009042	OTUD4
circOXA1L	7	76237513	76238347	-	ENSSSCT00000002285	ENSSSCG00000002042	OXA1L
circOXCT1_1	16	26576175	26646919	-	ENSSSCT00000044789	ENSSSCG00000016863	OXCT1
circOXCT1_2	16	26576175	26589063	-	ENSSSCT00000044789	ENSSSCG00000016863	OXCT1
circOXR1	4	30808727	30818482	-	ENSSSCT00000054493	ENSSSCG00000006037	OXR1
circP4HA1	14	75895154	75897301	-	ENSSSCT00000011264	ENSSSCG00000010292	P4HA1
circPAFAH1B1	12	48687198	48712536	+	ENSSSCT00000061836	ENSSSCG00000017836	PAFAH1B1
circPAK1	9	11845524	11849274	-	ENSSSCT00000034801	ENSSSCG00000014878	PAK1
circPAN3_1	11	5503064	5524214	+	ENSSSCT00000041753	ENSSSCG00000009319	PAN3
circPAN3_2	11	5587550	5602241	+	ENSSSCT00000010210	ENSSSCG00000009319	PAN3
circPAN3_3	11	5577246	5602241	+	ENSSSCT00000010210	ENSSSCG00000009319	PAN3
circPAN3_4	11	5503064	5507316	+	ENSSSCT00000041753	ENSSSCG00000009319	PAN3
circPAN3_5	11	5503064	5546751	+	ENSSSCT00000041753	ENSSSCG00000009319	PAN3
circPAN3_6	11	5577246	5588249	+	ENSSSCT00000041753	ENSSSCG00000009319	PAN3
circPAN3_7	11	5577246	5581004	+	ENSSSCT00000041753	ENSSSCG00000009319	PAN3
circPAPOLA_1	7	117718800	117735703	+	ENSSSCT00000002783	ENSSSCG00000002505	PAPOLA
circPAPOLA_2	7	117693553	117695673	+	ENSSSCT00000002783	ENSSSCG00000002505	PAPOLA
circPAPOLA_3	7	117718800	117724022	+	ENSSSCT00000002783	ENSSSCG00000002505	PAPOLA
circPAPOLA_4	7	117718800	117728559	+	ENSSSCT00000002783	ENSSSCG00000002505	PAPOLA
circPAPSS1	8	114266869	114285079	+	ENSSSCT00000063231	ENSSSCG00000031901	PAPSS1
circPARD3_1	10	57167880	57212680	-	ENSSSCT00000012150	ENSSSCG00000011103	PARD3
circPARD3_2	10	57250367	57252743	-	ENSSSCT00000012150	ENSSSCG00000011103	PARD3
circPARL_1	13	121802236	121802974	-	ENSSSCT00000050637	ENSSSCG00000033424	PARL
circPARL_2	13	121798855	121802974	-	ENSSSCT00000050637	ENSSSCG00000033424	PARL
circPARP4	11	376041	380465	+	ENSSSCT00000029020	ENSSSCG00000022957	PARP4
circPATJ_1	6	150318007	150327395	-	ENSSSCT00000049796	ENSSSCG00000039793	PATJ
circPATJ_2	6	150442267	150465449	-	ENSSSCT00000049796	ENSSSCG00000039793	PATJ
circPAXIP1	18	3101570	3102902	+	ENSSSCT00000047433	ENSSSCG00000025221	PAXIP1
circPBRM1_1	13	34799993	34814973	-	ENSSSCT00000048799	ENSSSCG00000035824	PBRM1
circPBRM1_2	13	34779560	34780761	-	ENSSSCT00000057913	ENSSSCG00000035824	PBRM1
circPCDH19	X	82070405	82145774	-	ENSSSCT00000050189	ENSSSCG00000012479	PCDH19
circPCMTD1_1	4	78124831	78125262	+	ENSSSCT00000047670	ENSSSCG00000006267	PCMTD1
circPCMTD1_2	4	78124831	78139488	+	ENSSSCT00000047670	ENSSSCG00000006267	PCMTD1
circPCMTD2	17	63033431	63044659	+	ENSSSCT00000043426	ENSSSCG00000038617	PCMTD2
circPCSK5	1	228980933	228986161	+	ENSSSCT00000046278	ENSSSCG00000023520	PCSK5
circPCSK6	1	145568781	145572777	+	ENSSSCT00000006361	ENSSSCG00000005785	PCSK6
circPCTP	12	32060087	32067455	+	ENSSSCT00000019169	ENSSSCG00000017608	PCTP
circPDCD4	14	121316587	121331392	+	ENSSSCT00000011623	ENSSSCG00000010627	PDCD4
circPDCD4_1	14	121316587	121320413	+	ENSSSCT00000011623	ENSSSCG00000010627	PDCD4
circPDCD4_2	14	121310319	121318744	+	ENSSSCT00000051692	ENSSSCG00000010627	PDCD4
circPDCD4_3	14	121310319	121320413	+	ENSSSCT00000051692	ENSSSCG00000010627	PDCD4
circPDCD4_4	14	121310319	121330061	+	ENSSSCT00000051692	ENSSSCG00000010627	PDCD4
circPDCD4_5	14	121316587	121318744	+	ENSSSCT00000011623	ENSSSCG00000010627	PDCD4
circPDE4D	16	38089158	38125845	-	ENSSSCT00000059868	ENSSSCG00000016929	PDE4D
circPDE7A	4	68845817	68849544	+	ENSSSCT00000058082	ENSSSCG00000006218	PDE7A
circPDIA5	13	137373442	137376721	-	ENSSSCT00000012984	ENSSSCG00000011870	PDIA5
circPDLIM5	8	125092161	125121806	-	ENSSSCT00000010065	ENSSSCG00000009192	PDLIM5
circPDPK1	3	39466945	39478565	-	ENSSSCT00000046231	ENSSSCG00000037719	PDPK1
circPDS5A	8	31024320	31025401	-	ENSSSCT00000048475	ENSSSCG00000023112	PDS5A
circPDS5B	11	9145563	9170916	+	ENSSSCT00000063159	ENSSSCG00000009345	PDS5B
circPER2	15	137824299	137825447	-	ENSSSCT00000017793	ENSSSCG00000016338	PER2
circPGM1	6	148878001	148880442	-	ENSSSCT00000004219	ENSSSCG00000003812	PGM1
circPGM2L1	9	8703166	8709627	-	ENSSSCT00000055213	ENSSSCG00000014838	PGM2L1
circPHC3_1	13	108816285	108854260	-	ENSSSCT00000057064	ENSSSCG00000030467	PHC3
circPHC3_2	13	108851500	108854260	-	ENSSSCT00000057064	ENSSSCG00000030467	PHC3
circPHC3_3	13	108874659	108880840	-	ENSSSCT00000040331	ENSSSCG00000030467	PHC3
circPHC3_4	13	108816285	108820326	-	ENSSSCT00000040331	ENSSSCG00000030467	PHC3
circPHC3_5	13	108842608	108854260	-	ENSSSCT00000057064	ENSSSCG00000030467	PHC3
circPHC3_6	13	108816285	108829633	-	ENSSSCT00000040331	ENSSSCG00000030467	PHC3
circPHF20_1	17	39115370	39144798	+	ENSSSCT00000031797	ENSSSCG00000007311	PHF20
circPHF20_2	17	39197684	39225969	+	ENSSSCT00000031797	ENSSSCG00000007311	PHF20
circPHIP	1	87134226	87153004	+	ENSSSCT00000004941	ENSSSCG00000004473	PHIP
circPHKB_1	6	37127248	37166517	-	ENSSSCT00000050959	ENSSSCG00000002844	PHKB
circPHKB_2	6	37151566	37166517	-	ENSSSCT00000050959	ENSSSCG00000002844	PHKB
circPHLDB2	13	147837955	147839301	-	ENSSSCT00000025800	ENSSSCG00000022081	PHLDB2
circPHLPP1	1	158693804	158709994	-	ENSSSCT00000005402	ENSSSCG00000004896	PHLPP1
circPHTF1	4	106850367	106874620	+	ENSSSCT00000007413	ENSSSCG00000006766	PHTF1
circPHYHIPL	14	62602233	62608494	+	ENSSSCT00000046544	ENSSSCG00000039215	PHYHIPL
circPIAS1_1	1	166036952	166044981	+	ENSSSCT00000005470	ENSSSCG00000004958	PIAS1
circPIAS1_2	1	165996062	166058413	+	ENSSSCT00000005470	ENSSSCG00000004958	PIAS1
circPIAS1_3	1	166036952	166058413	+	ENSSSCT00000005470	ENSSSCG00000004958	PIAS1
circPIAS1_4	1	165996062	165996507	+	ENSSSCT00000005470	ENSSSCG00000004958	PIAS1
circPIAS1_5	1	165996062	166044981	+	ENSSSCT00000005470	ENSSSCG00000004958	PIAS1
circPIAS1_6	1	166033283	166037819	+	ENSSSCT00000005470	ENSSSCG00000004958	PIAS1
circPIAS1_7	1	166033283	166044981	+	ENSSSCT00000005470	ENSSSCG00000004958	PIAS1
circPICALM_1	9	19892115	19913189	-	ENSSSCT00000023370	ENSSSCG00000014913	PICALM
circPICALM_2	9	19905674	19913189	-	ENSSSCT00000023370	ENSSSCG00000014913	PICALM
circPICALM_3	9	19897759	19913189	-	ENSSSCT00000023370	ENSSSCG00000014913	PICALM
circPICALM_4	9	19885864	19913189	-	ENSSSCT00000023370	ENSSSCG00000014913	PICALM
circPICALM_5	9	19852497	19861801	-	ENSSSCT00000023370	ENSSSCG00000014913	PICALM
circPIGN	1	159368256	159375875	+	ENSSSCT00000039986	ENSSSCG00000004901	PIGN
circPIK3C2A_1	2	42015141	42019626	+	ENSSSCT00000024535	ENSSSCG00000025406	PIK3C2A
circPIK3C2A_2	2	41996289	41996912	+	ENSSSCT00000024535	ENSSSCG00000025406	PIK3C2A
circPIK3R3	6	165355053	165380419	+	ENSSSCT00000004324	ENSSSCG00000003909	PIK3R3
circPIKFYVE	15	111375766	111391436	+	ENSSSCT00000063694	ENSSSCG00000016147	PIKFYVE
circPITPNB	14	45227612	45230916	-	ENSSSCT00000024426	ENSSSCG00000009967	PITPNB
circPJA2	2	114338108	114343919	-	ENSSSCT00000061337	ENSSSCG00000022845	PJA2
circPKN2	4	127630105	127631029	-	ENSSSCT00000045662	ENSSSCG00000006927	PKN2
circPKNOX1_1	13	206167155	206190153	+	ENSSSCT00000062079	ENSSSCG00000037663	PKNOX1
circPKNOX1_2	13	206168638	206190153	+	ENSSSCT00000062720	ENSSSCG00000037663	PKNOX1
circPKNOX1_3	13	206168638	206184025	+	ENSSSCT00000062720	ENSSSCG00000037663	PKNOX1
circPLCB1	17	17623990	17630911	+	ENSSSCT00000057642	ENSSSCG00000007056	PLCB1
circPLCE1	14	105458769	105460324	+	ENSSSCT00000049212	ENSSSCG00000010483	PLCE1
circPLEKHA5_1	5	53855332	53862191	-	ENSSSCT00000056634	ENSSSCG00000000588	PLEKHA5
circPLEKHA5_2	5	53828915	53838066	-	ENSSSCT00000056634	ENSSSCG00000000588	PLEKHA5
circPLEKHA5_3	5	53797748	53838066	-	ENSSSCT00000056634	ENSSSCG00000000588	PLEKHA5
circPLEKHA5_4	5	53832758	53833224	-	ENSSSCT00000056634	ENSSSCG00000000588	PLEKHA5
circPLIN2_1	1	203685645	203692596	+	ENSSSCT00000054843	ENSSSCG00000035863	PLIN2
circPLIN2_2	1	203685645	203694104	+	ENSSSCT00000054843	ENSSSCG00000035863	PLIN2
circPLPP1_1	16	34633973	34666354	-	ENSSSCT00000057634	ENSSSCG00000016912	PLPP1
circPLPP1_2	16	34633973	34639666	-	ENSSSCT00000042472	ENSSSCG00000016912	PLPP1
circPLXNC1	5	88954729	88957709	-	ENSSSCT00000000991	ENSSSCG00000000907	PLXNC1
circPMS1	15	94445127	94446961	+	ENSSSCT00000059289	ENSSSCG00000016045	PMS1
circPOLDIP3_1	5	6185345	6186572	+	ENSSSCT00000000041	ENSSSCG00000000039	POLDIP3
circPOLDIP3_2	5	6185345	6195200	+	ENSSSCT00000000041	ENSSSCG00000000039	POLDIP3
circPOLR3B	5	13841608	13864346	-	ENSSSCT00000000178	ENSSSCG00000000169	POLR3B
circPPA2	8	116275909	116294261	+	ENSSSCT00000053551	ENSSSCG00000022788	PPA2
circPPARG	13	68383627	68394776	+	ENSSSCT00000040903	ENSSSCG00000011579	PPARG
circPPFIA1	2	3096936	3098647	-	ENSSSCT00000041903	ENSSSCG00000037451	PPFIA1
circPPHLN1	5	73631381	73653060	+	ENSSSCT00000063623	ENSSSCG00000000793	PPHLN1
circPPIG	15	75944604	75953955	+	ENSSSCT00000066167	ENSSSCG00000031123	PPIG
circPPM1B	3	96249367	96260927	-	ENSSSCT00000009253	ENSSSCG00000008451	PPM1B
circPPM1D	12	37509449	37517080	-	ENSSSCT00000025171	ENSSSCG00000026665	PPM1D
circPPP1R12A	5	101541821	101572595	+	ENSSSCT00000057360	ENSSSCG00000038973	PPP1R12A
circPPP1R12B	10	24535473	24575688	+	ENSSSCT00000011956	ENSSSCG00000010925	PPP1R12B
circPPP2R1B	9	39494894	39504434	-	ENSSSCT00000053532	ENSSSCG00000029538	PPP2R1B
circPPP2R3A	13	77068766	77075075	+	ENSSSCT00000041882	ENSSSCG00000033185	PPP2R3A
circPPP2R5A	9	131042754	131046226	-	ENSSSCT00000016992	ENSSSCG00000015599	PPP2R5A
circPPP4R1	6	98504292	98506141	+	ENSSSCT00000004076	ENSSSCG00000003679	PPP4R1
circPPP6R3_1	2	4436086	4459058	-	ENSSSCT00000052161	ENSSSCG00000012884	PPP6R3
circPPP6R3_2	2	4412501	4422440	-	ENSSSCT00000014085	ENSSSCG00000012884	PPP6R3
circPPP6R3_3	2	4431224	4459058	-	ENSSSCT00000052161	ENSSSCG00000012884	PPP6R3
circPRELID2_1	2	147170888	147175048	-	ENSSSCT00000037134	ENSSSCG00000014406	PRELID2
circPRELID2_2	2	147146890	147175048	-	ENSSSCT00000037134	ENSSSCG00000014406	PRELID2
circPREX2	4	66925781	66930332	-	ENSSSCT00000065926	ENSSSCG00000006199	PREX2
circPRKAA2_1	6	155709579	155724087	-	ENSSSCT00000055782	ENSSSCG00000036145	PRKAA2
circPRKAA2_2	6	155709579	155715446	-	ENSSSCT00000055782	ENSSSCG00000036145	PRKAA2
circPRKAG2	18	5557294	5559973	+	ENSSSCT00000025093	ENSSSCG00000016432	PRKAG2
circPRKAR1A_1	12	11669305	11671052	-	ENSSSCT00000061440	ENSSSCG00000017259	PRKAR1A
circPRKAR1A_2	12	11669305	11672541	-	ENSSSCT00000061440	ENSSSCG00000017259	PRKAR1A
circPRKCI	13	108958193	108963151	+	ENSSSCT00000012856	ENSSSCG00000011745	PRKCI
circPRKD3	3	102849437	102850385	+	ENSSSCT00000009297	ENSSSCG00000008495	PRKD3
circPRKDC	4	79834116	79836538	+	ENSSSCT00000006873	ENSSSCG00000006274	PRKDC
circPRPF40A_1	15	60405552	60414442	-	ENSSSCT00000049118	ENSSSCG00000015867	PRPF40A
circPRPF40A_1	15	60404224	60414442	-	ENSSSCT00000049118	ENSSSCG00000015867	PRPF40A
circPRPF40A_2	15	60397512	60403463	-	ENSSSCT00000049118	ENSSSCG00000015867	PRPF40A
circPRPF40A_2	15	60412324	60414442	-	ENSSSCT00000049118	ENSSSCG00000015867	PRPF40A
circPRPF40A_3	15	60407129	60414442	-	ENSSSCT00000049118	ENSSSCG00000015867	PRPF40A
circPRPSAP1	12	5159730	5163734	+	ENSSSCT00000018709	ENSSSCG00000017184	PRPSAP1
circPSD3_1	17	12888328	12939377	+	ENSSSCT00000058258	ENSSSCG00000007034	PSD3
circPSD3_2	17	13008091	13012850	+	ENSSSCT00000058258	ENSSSCG00000007034	PSD3
circPSD3_3	17	13008091	13031589	+	ENSSSCT00000058258	ENSSSCG00000007034	PSD3
circPSIP1	1	207190792	207194651	+	ENSSSCT00000005714	ENSSSCG00000005183	PSIP1
circPSMC6	1	182338670	182341116	+	ENSSSCT00000056381	ENSSSCG00000005038	PSMC6
circPSMD2	13	122190539	122191051	+	ENSSSCT00000024405	ENSSSCG00000023998	PSMD2
circPSME4	3	87299326	87301882	+	ENSSSCT00000048172	ENSSSCG00000008412	PSME4
circPSPC1_1	11	552301	562934	-	ENSSSCT00000057535	ENSSSCG00000009569	PSPC1
circPSPC1_2	11	543479	562934	-	ENSSSCT00000057535	ENSSSCG00000009569	PSPC1
circPSPC1_3	11	534134	562934	-	ENSSSCT00000057535	ENSSSCG00000009569	PSPC1
circPTBP3_1	1	253012173	253014268	-	ENSSSCT00000063629	ENSSSCG00000005466	PTBP3
circPTBP3_2	1	253034154	253056412	-	ENSSSCT00000063629	ENSSSCG00000005466	PTBP3
circPTBP3_3	1	253012173	253056412	-	ENSSSCT00000063629	ENSSSCG00000005466	PTBP3
circPTGES3	5	22008783	22009750	-	ENSSSCT00000000439	ENSSSCG00000000406	PTGES3
circPTK2_1	4	2784322	2793098	+	ENSSSCT00000065316	ENSSSCG00000038397	PTK2
circPTK2_2	4	2738959	2760683	+	ENSSSCT00000065316	ENSSSCG00000038397	PTK2
circPTK2_3	4	2802045	2810920	+	ENSSSCT00000065316	ENSSSCG00000038397	PTK2
circPTP4A1_1	1	45173523	45175843	+	ENSSSCT00000050791	ENSSSCG00000025941	PTP4A1
circPTP4A1_2	1	45173523	45177436	+	ENSSSCT00000050791	ENSSSCG00000025941	PTP4A1
circPTP4A1_3	1	45173523	45175282	+	ENSSSCT00000050791	ENSSSCG00000025941	PTP4A1
circPTP4A1_4	1	45175189	45175843	+	ENSSSCT00000050791	ENSSSCG00000025941	PTP4A1
circPTPN11	14	39253306	39273275	-	ENSSSCT00000040231	ENSSSCG00000030289	PTPN11
circPTPN9_1	7	58112448	58117178	+	ENSSSCT00000002103	ENSSSCG00000001878	PTPN9
circPTPN9_2	7	58112448	58146958	+	ENSSSCT00000002103	ENSSSCG00000001878	PTPN9
circPTPN9_3	7	58137958	58140971	+	ENSSSCT00000002103	ENSSSCG00000001878	PTPN9
circPTPN9_4	7	58112448	58123585	+	ENSSSCT00000002103	ENSSSCG00000001878	PTPN9
circPTPRJ	2	14561880	14584665	-	ENSSSCT00000037559	ENSSSCG00000023709	PTPRJ
circPUM2_1	3	117952013	117958024	+	ENSSSCT00000050255	ENSSSCG00000008600	PUM2
circPUM2_2	3	117885520	117903927	+	ENSSSCT00000050255	ENSSSCG00000008600	PUM2
circPUM3	1	219000458	219002085	+	ENSSSCT00000005761	ENSSSCG00000005227	PUM3
circPUS7	9	105332137	105333913	-	ENSSSCT00000016808	ENSSSCG00000015428	PUS7
circPUS7	9	105332137	105336733	-	ENSSSCT00000016808	ENSSSCG00000015428	PUS7
circQKI	1	4775754	4843415	-	ENSSSCT00000057600	ENSSSCG00000004029	QKI
circQRICH1	13	31673545	31676127	-	ENSSSCT00000040844	ENSSSCG00000011373	QRICH1
circQRICH1	13	31682728	31683772	-	ENSSSCT00000040844	ENSSSCG00000011373	QRICH1
circQSER1_1	2	27989713	28004151	-	ENSSSCT00000061207	ENSSSCG00000013314	QSER1
circQSER1_2	2	27962401	27976384	-	ENSSSCT00000025799	ENSSSCG00000013314	QSER1
circR3HDM1_1	15	16258945	16277686	-	ENSSSCT00000065524	ENSSSCG00000015692	R3HDM1
circR3HDM1_2	15	16340140	16342055	-	ENSSSCT00000065524	ENSSSCG00000015692	R3HDM1
circRAB10	3	112848357	112871469	-	ENSSSCT00000009379	ENSSSCG00000008573	RAB10
circRAB28	8	9106388	9120512	-	ENSSSCT00000059086	ENSSSCG00000022358	RAB28
circRAB32	1	18987937	19005183	-	ENSSSCT00000004553	ENSSSCG00000004114	RAB32
circRAB3IP_1	5	34018843	34033773	+	ENSSSCT00000000539	ENSSSCG00000000500	RAB3IP
circRAB3IP_2	5	34018843	34020069	+	ENSSSCT00000043485	ENSSSCG00000000500	RAB3IP
circRAB6A_1	9	8147103	8161582	-	ENSSSCT00000048524	ENSSSCG00000014828	RAB6A
circRAB6A_2	9	8147103	8157830	-	ENSSSCT00000048524	ENSSSCG00000014828	RAB6A
circRAB6A_3	9	8147103	8158002	-	ENSSSCT00000051695	ENSSSCG00000014828	RAB6A
circRABEP1	12	51636712	51680596	-	ENSSSCT00000048601	ENSSSCG00000017895	RABEP1
circRABGAP1_1	1	264019072	264020783	+	ENSSSCT00000064053	ENSSSCG00000020743	RABGAP1
circRABGAP1_2	1	263932774	263940366	+	ENSSSCT00000064053	ENSSSCG00000020743	RABGAP1
circRABGAP1_3	1	263873073	263916275	+	ENSSSCT00000064053	ENSSSCG00000020743	RABGAP1
circRABGAP1L	9	116495348	116556539	+	ENSSSCT00000016886	ENSSSCG00000015499	RABGAP1L
circRAD18	13	65289859	65330679	-	ENSSSCT00000044091	ENSSSCG00000026158	RAD18
circRAD23B_1	1	248463644	248474020	+	ENSSSCT00000005980	ENSSSCG00000005436	RAD23B
circRAD23B_2	1	248463644	248483274	+	ENSSSCT00000005980	ENSSSCG00000005436	RAD23B
circRAD51C	12	34980902	35008491	+	ENSSSCT00000023145	ENSSSCG00000023955	RAD51C
circRAD54B	4	42327945	42361848	+	ENSSSCT00000040934	ENSSSCG00000006101	RAD54B
circRAF1	13	68599626	68611602	-	ENSSSCT00000041784	ENSSSCG00000024453	RAF1
circRALGAPA1_1	7	64286781	64287500	+	ENSSSCT00000053217	ENSSSCG00000032377	RALGAPA1
circRALGAPA1_2	7	64257404	64287500	+	ENSSSCT00000053217	ENSSSCG00000032377	RALGAPA1
circRALGPS1	1	267525105	267545008	+	ENSSSCT00000006165	ENSSSCG00000005607	RALGPS1
circRANBP9_1	7	9995686	10009711	-	ENSSSCT00000001150	ENSSSCG00000001056	RANBP9
circRANBP9_2	7	9980130	9988894	-	ENSSSCT00000001150	ENSSSCG00000001056	RANBP9
circRANBP9_3	7	9986989	10010669	-	ENSSSCT00000001150	ENSSSCG00000001056	RANBP9
circRANBP9_4	7	9980130	10009711	-	ENSSSCT00000001150	ENSSSCG00000001056	RANBP9
circRAPGEF2	8	48111299	48159079	+	ENSSSCT00000062306	ENSSSCG00000008881	RAPGEF2
circRARS	16	55385795	55397890	-	ENSSSCT00000018527	ENSSSCG00000017015	RARS
circRASA2_1	13	82256890	82285635	+	ENSSSCT00000012777	ENSSSCG00000011672	RASA2
circRASA2_2	13	82256890	82274534	+	ENSSSCT00000012777	ENSSSCG00000011672	RASA2
circRASA2_3	13	82256890	82261474	+	ENSSSCT00000012777	ENSSSCG00000011672	RASA2
circRASEF	10	31969408	31983374	+	ENSSSCT00000049403	ENSSSCG00000040707	RASEF
circRASGEF1B	8	136568710	136571455	+	ENSSSCT00000057626	ENSSSCG00000029507	RASGEF1B
circRASGRF2	2	89683591	89696375	+	ENSSSCT00000050250	ENSSSCG00000014127	RASGRF2
circRB1CC1	4	77612563	77618720	+	ENSSSCT00000064633	ENSSSCG00000028902	RB1CC1
circRBL1	17	40248100	40253898	-	ENSSSCT00000008022	ENSSSCG00000007331	RBL1
circRBM6_1	13	32559767	32563493	+	ENSSSCT00000012472	ENSSSCG00000011394	RBM6
circRBM6_2	13	32471839	32478114	+	ENSSSCT00000012472	ENSSSCG00000011394	RBM6
circRBM6_3	13	32554727	32563493	+	ENSSSCT00000012472	ENSSSCG00000011394	RBM6
circRC3H1	9	116218092	116219108	-	ENSSSCT00000041796	ENSSSCG00000015498	RC3H1
circRDH11	7	91432351	91438716	-	ENSSSCT00000002557	ENSSSCG00000002296	RDH11
circRDX	9	38263651	38283820	-	ENSSSCT00000062654	ENSSSCG00000015013	RDX
circRERE_1	6	69170745	69179898	-	ENSSSCT00000065793	ENSSSCG00000033497	RERE
circRERE_2	6	69106983	69124265	-	ENSSSCT00000065793	ENSSSCG00000033497	RERE
circREV1_1	3	54832392	54848408	+	ENSSSCT00000060593	ENSSSCG00000008179	REV1
circREV1_2	3	54832392	54850266	+	ENSSSCT00000060593	ENSSSCG00000008179	REV1
circREV1_3	3	54799380	54816635	+	ENSSSCT00000060593	ENSSSCG00000008179	REV1
circREV3L	1	77263698	77302848	-	ENSSSCT00000026193	ENSSSCG00000025703	REV3L
circRFC1	8	30613553	30621379	-	ENSSSCT00000063047	ENSSSCG00000008788	RFC1
circRFX7	1	115791743	115820705	+	ENSSSCT00000040161	ENSSSCG00000004603	RFX7
circRHBDD1	15	128371747	128373809	+	ENSSSCT00000017687	ENSSSCG00000016243	RHBDD1
circRHOBTB1	14	64342538	64345385	-	ENSSSCT00000038731	ENSSSCG00000028327	RHOBTB1
circRHOT1_1	12	42750232	42762928	-	ENSSSCT00000036939	ENSSSCG00000017735	RHOT1
circRHOT1_2	12	42741472	42758003	-	ENSSSCT00000036939	ENSSSCG00000017735	RHOT1
circRHOT1_3	12	42757753	42762928	-	ENSSSCT00000036939	ENSSSCG00000017735	RHOT1
circRHOT1_4	12	42750232	42758003	-	ENSSSCT00000036939	ENSSSCG00000017735	RHOT1
circRICTOR	16	24175666	24179590	-	ENSSSCT00000064773	ENSSSCG00000016853	RICTOR
circRILPL1	14	29444012	29445557	+	ENSSSCT00000040542	ENSSSCG00000009773	RILPL1
circRIMS1_1	1	52134345	52179177	+	ENSSSCT00000063919	ENSSSCG00000004280	RIMS1
circRIMS1_2	1	52123107	52179177	+	ENSSSCT00000004730	ENSSSCG00000004280	RIMS1
circRIMS1_3	1	52123107	52152735	+	ENSSSCT00000004730	ENSSSCG00000004280	RIMS1
circRIMS1_4	1	52130361	52179177	+	ENSSSCT00000004730	ENSSSCG00000004280	RIMS1
circRIMS1_5	1	52146556	52179177	+	ENSSSCT00000004730	ENSSSCG00000004280	RIMS1
circRINT1	9	105398475	105414182	+	ENSSSCT00000025616	ENSSSCG00000015430	RINT1
circRIOK3	6	108355194	108357319	+	ENSSSCT00000064771	ENSSSCG00000029518	RIOK3
circRNASEH1	3	131272240	131272989	+	ENSSSCT00000027102	ENSSSCG00000025305	RNASEH1
circRNF10	14	40502325	40502723	+	ENSSSCT00000010860	ENSSSCG00000009910	RNF10
circRNF111_1	1	113012686	113013582	-	ENSSSCT00000005070	ENSSSCG00000004589	RNF111
circRNF111_2	1	112996634	113013582	-	ENSSSCT00000005070	ENSSSCG00000004589	RNF111
circRNF115	4	99515002	99537986	+	ENSSSCT00000053819	ENSSSCG00000037355	RNF115
circRNF121	9	6555048	6561930	+	ENSSSCT00000016151	ENSSSCG00000014800	RNF121
circRNF138	6	115954026	115957402	+	ENSSSCT00000066226	ENSSSCG00000003730	RNF138
circRNF145	16	64257834	64266685	+	ENSSSCT00000044362	ENSSSCG00000017043	RNF145
circRNF169_1	9	9103676	9149572	+	ENSSSCT00000032202	ENSSSCG00000021822	RNF169
circRNF169_2	9	9143067	9149572	+	ENSSSCT00000032202	ENSSSCG00000021822	RNF169
circRNF2	9	126270540	126275426	+	ENSSSCT00000051776	ENSSSCG00000015568	RNF2
circRNF216_1	3	4303784	4308978	-	ENSSSCT00000027403	ENSSSCG00000021285	RNF216
circRNF216_2	3	4264223	4277544	-	ENSSSCT00000027403	ENSSSCG00000021285	RNF216
circRNF216_3	3	4269794	4279580	-	ENSSSCT00000027403	ENSSSCG00000021285	RNF216
circRNF219	11	50762619	50773425	-	ENSSSCT00000031188	ENSSSCG00000029113	RNF219
circROCK1	6	106217222	106217661	-	ENSSSCT00000046687	ENSSSCG00000021893	ROCK1
circRPAP2_1	4	124722045	124744355	-	ENSSSCT00000042637	ENSSSCG00000006903	RPAP2
circRPAP2_2	4	124722045	124735466	-	ENSSSCT00000042637	ENSSSCG00000006903	RPAP2
circRPL3	5	8925250	8926054	+	ENSSSCT00000063010	ENSSSCG00000040494	RPL3
circRPRD1B	17	41119107	41127499	+	ENSSSCT00000065583	ENSSSCG00000007342	RPRD1B
circRPRD2	4	98669434	98676168	-	ENSSSCT00000022559	ENSSSCG00000030291	RPRD2
circRPS6KB1_1	12	36123742	36126760	+	ENSSSCT00000019234	ENSSSCG00000017670	RPS6KB1
circRPS6KB1_2	12	36150267	36154292	+	ENSSSCT00000019234	ENSSSCG00000017670	RPS6KB1
circRPS6KB1_3	12	36123742	36150375	+	ENSSSCT00000019234	ENSSSCG00000017670	RPS6KB1
circRPS6KB1_4	12	36123742	36154292	+	ENSSSCT00000019234	ENSSSCG00000017670	RPS6KB1
circRPS6KB1_5	12	36144954	36154292	+	ENSSSCT00000019234	ENSSSCG00000017670	RPS6KB1
circRPS6KC1_1	9	130326632	130384896	-	ENSSSCT00000065919	ENSSSCG00000015586	RPS6KC1
circRPS6KC1_2	9	130372678	130384896	-	ENSSSCT00000065919	ENSSSCG00000015586	RPS6KC1
circRPSA	13	24074310	24075912	+	ENSSSCT00000012334	ENSSSCG00000037236	RPSA
circRRAS2	2	44943646	44945046	+	ENSSSCT00000041686	ENSSSCG00000033786	RRAS2
circRRP15	10	8265576	8271193	+	ENSSSCT00000024386	ENSSSCG00000027846	RRP15
circRSC1A1	6	74817821	74832543	+	ENSSSCT00000003847	ENSSSCG00000003461	RSC1A1
circRSF1_1	9	12155870	12166226	-	ENSSSCT00000016236	ENSSSCG00000014882	RSF1
circRSF1_2	9	12146483	12166226	-	ENSSSCT00000016236	ENSSSCG00000014882	RSF1
circRSF1_3	9	12162492	12166226	-	ENSSSCT00000016236	ENSSSCG00000014882	RSF1
circRSRC1_1	13	97912253	97995384	+	ENSSSCT00000027533	ENSSSCG00000027556	RSRC1
circRSRC1_2	13	97912253	97913066	+	ENSSSCT00000027533	ENSSSCG00000027556	RSRC1
circRTTN_3	1	152723998	152737450	+	ENSSSCT00000043505	ENSSSCG00000032574	RTTN
circRUFY1	2	78994800	78999927	-	ENSSSCT00000059445	ENSSSCG00000014023	RUFY1
circRUFY3	8	67573391	67578556	+	ENSSSCT00000057211	ENSSSCG00000025514	RUFY3
circRXFP1	8	47560218	47561108	+	ENSSSCT00000009716	ENSSSCG00000008875	RXFP1
circS100PBP	6	89127455	89131566	+	ENSSSCT00000024488	ENSSSCG00000022801	S100PBP
circSACM1L	13	28871681	28873176	+	ENSSSCT00000029881	ENSSSCG00000027176	SACM1L
circSAMD4A	1	184048956	184049475	+	ENSSSCT00000024259	ENSSSCG00000023408	SAMD4A
circSAMD4B	6	48037866	48038991	+	ENSSSCT00000033498	ENSSSCG00000010706	SAMD4B
circSASH1	1	17372567	17382520	-	ENSSSCT00000059607	ENSSSCG00000033175	SASH1
circSBNO1	14	29572245	29580115	+	ENSSSCT00000010718	ENSSSCG00000009776	SBNO1
circSCAF11	5	76839520	76857881	-	ENSSSCT00000031177	ENSSSCG00000000806	SCAF11
circSCAF4	13	195361318	195364404	-	ENSSSCT00000030551	ENSSSCG00000021023	SCAF4
circSCAF8_1	1	12041131	12042596	-	ENSSSCT00000062929	ENSSSCG00000004070	SCAF8
circSCAF8_2	1	12041131	12043885	-	ENSSSCT00000062929	ENSSSCG00000004070	SCAF8
circSCAF8_3	1	12071469	12074918	-	ENSSSCT00000062929	ENSSSCG00000004070	SCAF8
circSCAI	1	265729317	265751600	-	ENSSSCT00000044592	ENSSSCG00000005598	SCAI
circSCAMP1	2	87254644	87264182	+	ENSSSCT00000054996	ENSSSCG00000034795	SCAMP1
circSCARB1	14	28362155	28373135	+	ENSSSCT00000010699	ENSSSCG00000009759	SCARB1
circSCLT1	8	96122580	96129123	+	ENSSSCT00000009935	ENSSSCG00000029943	SCLT1
circSCMH1_1	6	170065056	170101586	+	ENSSSCT00000065474	ENSSSCG00000003971	SCMH1
circSCMH1_2	6	170137544	170143503	+	ENSSSCT00000065474	ENSSSCG00000003971	SCMH1
circSCPEP1	12	33289728	33290715	+	ENSSSCT00000057144	ENSSSCG00000017617	SCPEP1
circSCYL2	5	83829026	83836287	-	ENSSSCT00000049215	ENSSSCG00000000877	SCYL2
circSDAD1	8	71638231	71643022	-	ENSSSCT00000040706	ENSSSCG00000008974	SDAD1
circSEC13	13	66493800	66495580	-	ENSSSCT00000012664	ENSSSCG00000011572	SEC13
circSEC23B_1	17	26785300	26795212	+	ENSSSCT00000007769	ENSSSCG00000007097	SEC23B
circSEC23B_2	17	26786575	26795212	+	ENSSSCT00000007769	ENSSSCG00000007097	SEC23B
circSEC23B_3	17	26792796	26795212	+	ENSSSCT00000007769	ENSSSCG00000007097	SEC23B
circSEC24A_1	2	136907205	136920524	+	ENSSSCT00000061719	ENSSSCG00000014304	SEC24A
circSEC24A_2	2	136907205	136911528	+	ENSSSCT00000061719	ENSSSCG00000014304	SEC24A
circSEC24A_3	2	136895592	136896075	+	ENSSSCT00000061719	ENSSSCG00000014304	SEC24A
circSEC24A_4	2	136907205	136929529	+	ENSSSCT00000061719	ENSSSCG00000014304	SEC24A
circSEC24A_5	2	136907205	136916014	+	ENSSSCT00000061719	ENSSSCG00000014304	SEC24A
circSEC24A_6	2	136907205	136937721	+	ENSSSCT00000061719	ENSSSCG00000014304	SEC24A
circSEC24A_7	2	136907205	136933834	+	ENSSSCT00000061719	ENSSSCG00000014304	SEC24A
circSEC24A_8	2	136907205	136907907	+	ENSSSCT00000061719	ENSSSCG00000014304	SEC24A
circSEC24A_9	2	136907205	136914107	+	ENSSSCT00000061719	ENSSSCG00000014304	SEC24A
circSEC24B_1	8	112677570	112678436	-	ENSSSCT00000010010	ENSSSCG00000009142	SEC24B
circSEC24B_2	8	112685623	112686605	-	ENSSSCT00000010010	ENSSSCG00000009142	SEC24B
circSEC24D	8	104923136	104931876	+	ENSSSCT00000032140	ENSSSCG00000009112	SEC24D
circSEC62_1	13	108669555	108677607	+	ENSSSCT00000040170	ENSSSCG00000029608	SEC62
circSEC62_2	13	108671002	108683011	+	ENSSSCT00000040170	ENSSSCG00000029608	SEC62
circSEC63	1	74028417	74030320	-	ENSSSCT00000004844	ENSSSCG00000004382	SEC63
circSECISBP2	14	919879	935525	+	ENSSSCT00000030875	ENSSSCG00000028033	SECISBP2
circSECISBP2	14	919879	920515	+	ENSSSCT00000030875	ENSSSCG00000028033	SECISBP2
circSENP7_1	13	157589372	157628266	+	ENSSSCT00000039429	ENSSSCG00000021791	SENP7
circSENP7_2	13	157589372	157600510	+	ENSSSCT00000039429	ENSSSCG00000021791	SENP7
circSENP7_3	13	157615687	157628266	+	ENSSSCT00000039429	ENSSSCG00000021791	SENP7
circSENP7_4	13	157622607	157622950	+	ENSSSCT00000039429	ENSSSCG00000021791	SENP7
circSEPT7_5	18	38110774	38132080	-	ENSSSCT00000055400	ENSSSCG00000016661	SEPT7
circSERINC2	6	88009735	88010270	+	ENSSSCT00000031059	ENSSSCG00000023585	SERINC2
circSESTD1	15	84830995	84870609	-	ENSSSCT00000017426	ENSSSCG00000016005	SESTD1
circSETBP1	1	94557867	94561324	+	ENSSSCT00000004961	ENSSSCG00000004490	SETBP1
circSETD2_1	13	29915861	29925370	-	ENSSSCT00000044654	ENSSSCG00000011332	SETD2
circSETD2_2	13	29953609	29960782	-	ENSSSCT00000044654	ENSSSCG00000011332	SETD2
circSETD3	7	120464279	120473807	-	ENSSSCT00000061090	ENSSSCG00000002508	SETD3
circSF3B3	6	13564513	13566223	+	ENSSSCT00000042511	ENSSSCG00000025323	SF3B3
circSH3BP4	15	135073654	135082184	+	ENSSSCT00000046411	ENSSSCG00000034692	SH3BP4
circSH3GLB1_1	4	129378276	129385680	-	ENSSSCT00000050084	ENSSSCG00000006930	SH3GLB1
circSH3GLB1_2	4	129368385	129385680	-	ENSSSCT00000050084	ENSSSCG00000006930	SH3GLB1
circSHANK2	2	2571404	2576539	+	ENSSSCT00000026062	ENSSSCG00000033043	SHANK2
circSHOC2	14	121395347	121396290	+	ENSSSCT00000066370	ENSSSCG00000010628	SHOC2
circSIN3A	7	58196070	58200499	+	ENSSSCT00000056584	ENSSSCG00000001880	SIN3A
circSLAIN2_1	8	38273588	38296131	+	ENSSSCT00000048245	ENSSSCG00000008821	SLAIN2
circSLAIN2_2	8	38273588	38287382	+	ENSSSCT00000009651	ENSSSCG00000008821	SLAIN2
circSLC15A2	13	138651413	138667654	-	ENSSSCT00000054922	ENSSSCG00000030305	SLC15A2
circSLC25A3	5	85285641	85286475	-	ENSSSCT00000064711	ENSSSCG00000000886	SLC25A3
circSLC25A40	9	92497946	92501670	+	ENSSSCT00000028088	ENSSSCG00000026177	SLC25A40
circSLC30A7_1	4	117360109	117367392	-	ENSSSCT00000048059	ENSSSCG00000006860	SLC30A7
circSLC30A7_2	4	117360109	117381169	-	ENSSSCT00000048059	ENSSSCG00000006860	SLC30A7
circSLC33A1_1	13	95702962	95703536	-	ENSSSCT00000045637	ENSSSCG00000025316	SLC33A1
circSLC33A1_2	13	95698443	95703536	-	ENSSSCT00000045637	ENSSSCG00000025316	SLC33A1
circSLC33A1_3	13	95696482	95709483	-	ENSSSCT00000045637	ENSSSCG00000025316	SLC33A1
circSLC33A1_4	13	95702962	95709483	-	ENSSSCT00000045637	ENSSSCG00000025316	SLC33A1
circSLC38A10	12	1492106	1494267	+	ENSSSCT00000031734	ENSSSCG00000022317	SLC38A10
circSLC38A9_1	16	34798440	34800600	-	ENSSSCT00000042102	ENSSSCG00000030343	SLC38A9
circSLC38A9_2	16	34798440	34803686	-	ENSSSCT00000042102	ENSSSCG00000030343	SLC38A9
circSLC38A9_3	16	34779425	34803686	-	ENSSSCT00000042102	ENSSSCG00000030343	SLC38A9
circSLC39A8_4	8	118634095	118644648	+	ENSSSCT00000041377	ENSSSCG00000009169	SLC39A8
circSLC39A8_5	8	118634095	118676711	+	ENSSSCT00000010041	ENSSSCG00000009169	SLC39A8
circSLC5A10_1	12	60366857	60376920	-	ENSSSCT00000064503	ENSSSCG00000018049	SLC5A10
circSLC5A10_2	12	60373333	60376920	-	ENSSSCT00000064503	ENSSSCG00000018049	SLC5A10
circSLC5A10_3	12	60361137	60376920	-	ENSSSCT00000064503	ENSSSCG00000018049	SLC5A10
circSLC5A10_4	12	60348041	60376920	-	ENSSSCT00000064503	ENSSSCG00000018049	SLC5A10
circSLC5A10_5	12	60361137	60376568	-	ENSSSCT00000064503	ENSSSCG00000018049	SLC5A10
circSLC5A10_6	12	60348041	60370222	-	ENSSSCT00000064503	ENSSSCG00000018049	SLC5A10
circSLC5A10_7	12	60370049	60376920	-	ENSSSCT00000064503	ENSSSCG00000018049	SLC5A10
circSLC5A10_8	12	60376418	60376920	-	ENSSSCT00000064503	ENSSSCG00000018049	SLC5A10
circSLC6A14	X	95494058	95498743	+	ENSSSCT00000032445	ENSSSCG00000022372	SLC6A14
circSLC7A6_1	6	28848629	28849188	+	ENSSSCT00000061095	ENSSSCG00000034835	SLC7A6
circSLC9A6_2	X	111210947	111220783	+	ENSSSCT00000036051	ENSSSCG00000012698	SLC9A6
circSLTM_1	1	113127999	113128579	+	ENSSSCT00000005073	ENSSSCG00000004592	SLTM
circSLTM_2	1	113097706	113102025	+	ENSSSCT00000005073	ENSSSCG00000004592	SLTM
circSLTM_3	1	113115995	113131324	+	ENSSSCT00000005073	ENSSSCG00000004592	SLTM
circSMAD1_1	8	82957078	82957656	-	ENSSSCT00000009900	ENSSSCG00000009040	SMAD1
circSMAD1_2	8	82913301	82927163	-	ENSSSCT00000050396	ENSSSCG00000009040	SMAD1
circSMAD1_3	8	82957078	82967294	-	ENSSSCT00000062941	ENSSSCG00000009040	SMAD1
circSMAD4_1	1	100589849	100613174	+	ENSSSCT00000004997	ENSSSCG00000004524	SMAD4
circSMAD4_2	1	100597459	100613174	+	ENSSSCT00000004997	ENSSSCG00000004524	SMAD4
circSMAD4_3	1	100589849	100603238	+	ENSSSCT00000004997	ENSSSCG00000004524	SMAD4
circSMAD4_4	1	100589849	100624993	+	ENSSSCT00000004997	ENSSSCG00000004524	SMAD4
circSMAD4_5	1	100589849	100597672	+	ENSSSCT00000004997	ENSSSCG00000004524	SMAD4
circSMAD5_1	2	138308108	138320744	+	ENSSSCT00000053829	ENSSSCG00000014319	SMAD5
circSMAD5_2	2	138308108	138308679	+	ENSSSCT00000053829	ENSSSCG00000014319	SMAD5
circSMARCA2	1	219640994	219661659	-	ENSSSCT00000005766	ENSSSCG00000005232	SMARCA2
circSMARCC1_1	13	30544507	30564659	-	ENSSSCT00000046724	ENSSSCG00000011340	SMARCC1
circSMARCC1_2	13	30431232	30473996	-	ENSSSCT00000046724	ENSSSCG00000011340	SMARCC1
circSMARCC1_3	13	30524873	30547685	-	ENSSSCT00000046724	ENSSSCG00000011340	SMARCC1
circSMC3	14	120993719	120996812	+	ENSSSCT00000011621	ENSSSCG00000010625	SMC3
circSMC4	13	100108434	100110232	+	ENSSSCT00000047103	ENSSSCG00000011731	SMC4
circSMC5	1	223565044	223572485	+	ENSSSCT00000049308	ENSSSCG00000005255	SMC5
circSMCHD1_1	6	103898017	103929043	-	ENSSSCT00000029309	ENSSSCG00000029030	SMCHD1
circSMCHD1_2	6	103910116	103911289	-	ENSSSCT00000029309	ENSSSCG00000029030	SMCHD1
circSMCHD1_3	6	103870688	103879369	-	ENSSSCT00000029309	ENSSSCG00000029030	SMCHD1
circSMG1_1	3	26701498	26703165	+	ENSSSCT00000054147	ENSSSCG00000032531	SMG1
circSMG1_2	3	26683192	26690578	+	ENSSSCT00000054147	ENSSSCG00000032531	SMG1
circSMG1_3	3	26683192	26685606	+	ENSSSCT00000054147	ENSSSCG00000032531	SMG1
circSMG1_4	3	26701498	26705896	+	ENSSSCT00000054147	ENSSSCG00000032531	SMG1
circSMG7	9	124746021	124747461	+	ENSSSCT00000048611	ENSSSCG00000015558	SMG7
circSNAP47	2	50877352	50886317	+	ENSSSCT00000015274	ENSSSCG00000013984	SNAP47
circSNRK	13	26682836	26686462	+	ENSSSCT00000055027	ENSSSCG00000011295	SNRK
circSNTB2	6	17706790	17726847	-	ENSSSCT00000025739	ENSSSCG00000028109	SNTB2
circSNX13	9	87039401	87047919	-	ENSSSCT00000029645	ENSSSCG00000024761	SNX13
circSNX14	1	54494180	54502778	-	ENSSSCT00000004747	ENSSSCG00000004293	SNX14
circSNX25_1	15	46294097	46315302	+	ENSSSCT00000017192	ENSSSCG00000015789	SNX25
circSNX25_2	15	46307507	46315302	+	ENSSSCT00000017192	ENSSSCG00000015789	SNX25
circSNX27_1	4	97552285	97576948	-	ENSSSCT00000007253	ENSSSCG00000006619	SNX27
circSNX27_2	4	97566523	97576948	-	ENSSSCT00000007253	ENSSSCG00000006619	SNX27
circSNX6	7	65198471	65198799	+	ENSSSCT00000065561	ENSSSCG00000040912	SNX6
circSNX9	1	9191140	9195425	-	ENSSSCT00000053140	ENSSSCG00000030535	SNX9
circSOCS7	12	23704144	23714352	-	ENSSSCT00000019652	ENSSSCG00000018057	SOCS7
circSORBS1_1	14	106961379	106978586	-	ENSSSCT00000011482	ENSSSCG00000010494	SORBS1
circSORBS1_2	14	106919328	106927209	-	ENSSSCT00000011482	ENSSSCG00000010494	SORBS1
circSORBS1_3	14	106961379	106988787	-	ENSSSCT00000011482	ENSSSCG00000010494	SORBS1
circSORD	1	126674491	126678967	-	ENSSSCT00000055444	ENSSSCG00000004679	SORD
circSPAG9_1	12	27298749	27312593	-	ENSSSCT00000061632	ENSSSCG00000033228	SPAG9
circSPAG9_2	12	27249778	27250993	-	ENSSSCT00000061632	ENSSSCG00000033228	SPAG9
circSPAG9_3	12	27243216	27252923	-	ENSSSCT00000042938	ENSSSCG00000033228	SPAG9
circSPAG9_4	12	27268442	27275982	-	ENSSSCT00000061632	ENSSSCG00000033228	SPAG9
circSPATA6	6	163299857	163306198	+	ENSSSCT00000004293	ENSSSCG00000003881	SPATA6
circSPECC1	12	59541640	59546736	-	ENSSSCT00000060615	ENSSSCG00000034364	SPECC1
circSPEN_1	6	75038900	75043103	+	ENSSSCT00000042154	ENSSSCG00000034484	SPEN
circSPEN_2	6	75076437	75083806	+	ENSSSCT00000042154	ENSSSCG00000034484	SPEN
circSPG21	1	107028043	107031624	+	ENSSSCT00000005019	ENSSSCG00000004544	SPG21
circSPICE1	13	146421222	146438569	+	ENSSSCT00000029496	ENSSSCG00000024663	SPICE1
circSPIDR	4	79987799	79990116	-	ENSSSCT00000042869	ENSSSCG00000006277	SPIDR
circSPPL3_1	14	40712178	40720760	-	ENSSSCT00000010867	ENSSSCG00000009917	SPPL3
circSPPL3_2	14	40712178	40715025	-	ENSSSCT00000010867	ENSSSCG00000009917	SPPL3
circSPRED1	1	132924803	132963031	-	ENSSSCT00000055368	ENSSSCG00000039393	SPRED1
circSREK1	16	44588093	44614040	+	ENSSSCT00000041039	ENSSSCG00000032726	SREK1
circSRP54	7	64842213	64854244	-	ENSSSCT00000002187	ENSSSCG00000001955	SRP54
circSRPK1	7	31665248	31669318	-	ENSSSCT00000059532	ENSSSCG00000001554	SRPK1
circSRPK2_1	9	105035940	105101002	-	ENSSSCT00000038637	ENSSSCG00000026110	SRPK2
circSRPK2_2	9	105054993	105061896	-	ENSSSCT00000038637	ENSSSCG00000026110	SRPK2
circSS18_1	6	110753544	110779333	-	ENSSSCT00000004116	ENSSSCG00000003716	SS18
circSS18_2	6	110753544	110758296	-	ENSSSCT00000004116	ENSSSCG00000003716	SS18
circST13	5	7594739	7603935	+	ENSSSCT00000000077	ENSSSCG00000000071	ST13
circST3GAL6	13	160181593	160204381	-	ENSSSCT00000062786	ENSSSCG00000034493	ST3GAL6
circST7L_1	4	107846329	107848522	+	ENSSSCT00000056333	ENSSSCG00000006779	ST7L
circST7L_2	4	107828267	107853387	+	ENSSSCT00000056333	ENSSSCG00000006779	ST7L
circST7L_3	4	107843863	107888159	+	ENSSSCT00000037780	ENSSSCG00000006779	ST7L
circSTAG1	13	77334365	77349444	-	ENSSSCT00000012756	ENSSSCG00000011652	STAG1
circSTAG2	X	101525184	101536227	+	ENSSSCT00000033242	ENSSSCG00000012642	STAG2
circSTAU1	17	50839772	50849854	-	ENSSSCT00000059677	ENSSSCG00000027444	STAU1
circSTAU2	4	62146810	62187826	+	ENSSSCT00000050776	ENSSSCG00000006179	STAU2
circSTK17A	18	51340814	51349397	-	ENSSSCT00000018240	ENSSSCG00000016758	STK17A
circSTK3	4	38110195	38111049	+	ENSSSCT00000061571	ENSSSCG00000006074	STK3
circSTRN3_1	7	68514624	68533985	+	ENSSSCT00000040965	ENSSSCG00000040657	STRN3
circSTRN3_2	7	68514624	68521235	+	ENSSSCT00000040965	ENSSSCG00000040657	STRN3
circSTRN3_3	7	68514624	68539413	+	ENSSSCT00000040965	ENSSSCG00000040657	STRN3
circSTT3B	13	17582875	17587193	+	ENSSSCT00000012296	ENSSSCG00000011229	STT3B
circSTX8	12	54477950	54492240	-	ENSSSCT00000064313	ENSSSCG00000034964	STX8
circSTXBP3_1	4	111248142	111251135	-	ENSSSCT00000042059	ENSSSCG00000006845	STXBP3
circSTXBP3_2	4	111245265	111251135	-	ENSSSCT00000042059	ENSSSCG00000006845	STXBP3
circSUCO_1	9	114939348	114944875	+	ENSSSCT00000016869	ENSSSCG00000015485	SUCO
circSUCO_2	9	114937098	114951665	+	ENSSSCT00000016869	ENSSSCG00000015485	SUCO
circSUGCT_1	18	54227234	54270584	-	ENSSSCT00000047945	ENSSSCG00000035581	SUGCT
circSUGCT_2	18	54260018	54270584	-	ENSSSCT00000047945	ENSSSCG00000035581	SUGCT
circSULF2	17	49753768	49773427	-	ENSSSCT00000055233	ENSSSCG00000007456	SULF2
circSUPT20H	11	12858352	12862293	-	ENSSSCT00000052734	ENSSSCG00000009359	SUPT20H
circSVIL	10	41229016	41257277	+	ENSSSCT00000038609	ENSSSCG00000011022	SVIL
circSWT1_1	9	126407564	126438047	+	ENSSSCT00000016960	ENSSSCG00000015569	SWT1
circSWT1_2	9	126369375	126371543	+	ENSSSCT00000016960	ENSSSCG00000015569	SWT1
circSYDE2	4	130722829	130728385	+	ENSSSCT00000007611	ENSSSCG00000006947	SYDE2
circSYNCRIP_1	1	54576237	54581212	-	ENSSSCT00000055678	ENSSSCG00000004294	SYNCRIP
circSYNCRIP_2	1	54576237	54576836	-	ENSSSCT00000055678	ENSSSCG00000004294	SYNCRIP
circSYNE2_1	1	194038569	194064182	-	ENSSSCT00000054162	ENSSSCG00000005110	SYNE2
circSYNE2_2	1	194001519	194011399	-	ENSSSCT00000054162	ENSSSCG00000005110	SYNE2
circSYNRG	12	39036724	39037930	-	ENSSSCT00000049452	ENSSSCG00000026596	SYNRG
circTACC1	15	47755744	47780980	-	ENSSSCT00000057125	ENSSSCG00000015814	TACC1
circTAF4	17	61482066	61497286	-	ENSSSCT00000024716	ENSSSCG00000024694	TAF4
circTAF4B	6	110866623	110892394	+	ENSSSCT00000059723	ENSSSCG00000003718	TAF4B
circTAOK1	12	45694157	45712669	+	ENSSSCT00000019362	ENSSSCG00000017790	TAOK1
circTAX1BP1_1	18	44838255	44851815	-	ENSSSCT00000059402	ENSSSCG00000016692	TAX1BP1
circTAX1BP1_2	18	44885413	44890608	-	ENSSSCT00000058734	ENSSSCG00000016692	TAX1BP1
circTAX1BP1_3	18	44885413	44897643	-	ENSSSCT00000058734	ENSSSCG00000016692	TAX1BP1
circTAX1BP1_4	18	44885413	44903054	-	ENSSSCT00000036364	ENSSSCG00000016692	TAX1BP1
circTBC1D1	8	29513968	29561547	+	ENSSSCT00000046818	ENSSSCG00000028983	TBC1D1
circTBC1D12_1	14	105893634	105912720	+	ENSSSCT00000058672	ENSSSCG00000010485	TBC1D12
circTBC1D12_2	14	105866976	105902806	+	ENSSSCT00000058672	ENSSSCG00000010485	TBC1D12
circTBC1D12_3	14	105893634	105902806	+	ENSSSCT00000058672	ENSSSCG00000010485	TBC1D12
circTBC1D22A_1	5	2619763	2692132	-	ENSSSCT00000001044	ENSSSCG00000000955	TBC1D22A
circTBC1D22A_2	5	2675421	2692132	-	ENSSSCT00000001044	ENSSSCG00000000955	TBC1D22A
circTBC1D22A_3	5	2637893	2692132	-	ENSSSCT00000001044	ENSSSCG00000000955	TBC1D22A
circTBC1D23	13	158683518	158686017	-	ENSSSCT00000030794	ENSSSCG00000030486	TBC1D23
circTBC1D32_1	1	41144281	41164096	+	ENSSSCT00000060707	ENSSSCG00000004242	TBC1D32
circTBC1D32_2	1	41144281	41177466	+	ENSSSCT00000060707	ENSSSCG00000004242	TBC1D32
circTBC1D32_3	1	41144281	41180922	+	ENSSSCT00000060707	ENSSSCG00000004242	TBC1D32
circTBC1D5	13	4407149	4414280	-	ENSSSCT00000060482	ENSSSCG00000011199	TBC1D5
circTBC1D8_1	3	53231003	53238013	+	ENSSSCT00000038915	ENSSSCG00000008169	TBC1D8
circTBC1D8_2	3	53270126	53270926	+	ENSSSCT00000038915	ENSSSCG00000008169	TBC1D8
circTBCD	12	413916	435701	-	ENSSSCT00000018654	ENSSSCG00000017136	TBCD
circTC2N_1	7	113349921	113358807	-	ENSSSCT00000039469	ENSSSCG00000002443	TC2N
circTC2N_2	7	113369840	113371752	-	ENSSSCT00000039469	ENSSSCG00000002443	TC2N
circTC2N_3	7	113349921	113371752	-	ENSSSCT00000039469	ENSSSCG00000002443	TC2N
circTCF12	1	114737785	114740195	-	ENSSSCT00000061260	ENSSSCG00000004600	TCF12
circTCP1	1	7594611	7598381	+	ENSSSCT00000004476	ENSSSCG00000004048	TCP1
circTDRD3_1	11	33391960	33392814	+	ENSSSCT00000024660	ENSSSCG00000009449	TDRD3
circTDRD3_2	11	33313985	33336182	+	ENSSSCT00000024660	ENSSSCG00000009449	TDRD3
circTECTA	9	48152107	48168468	+	ENSSSCT00000022658	ENSSSCG00000023728	TECTA
circTENT4A	16	75225386	75232858	-	ENSSSCT00000018620	ENSSSCG00000017102	TENT4A
circTESK2	6	165903477	165951653	+	ENSSSCT00000004332	ENSSSCG00000003917	TESK2
circTET1_1	14	71765049	71767362	+	ENSSSCT00000011209	ENSSSCG00000010241	TET1
circTET1_2	14	71765049	71773116	+	ENSSSCT00000011209	ENSSSCG00000010241	TET1
circTEX10_1	1	242111790	242116331	-	ENSSSCT00000005932	ENSSSCG00000005389	TEX10
circTEX10_2	1	242111790	242113126	-	ENSSSCT00000005932	ENSSSCG00000005389	TEX10
circTEX9	1	115553444	115585772	-	ENSSSCT00000005083	ENSSSCG00000004602	TEX9
circTFAP2A	7	7229299	7235206	-	ENSSSCT00000001129	ENSSSCG00000001036	TFAP2A
circTFEB	7	36873608	36874486	-	ENSSSCT00000001802	ENSSSCG00000001621	TFEB
circTFRC	13	133976764	133981842	+	ENSSSCT00000012960	ENSSSCG00000011848	TFRC
circTGFB2	10	8382469	8386109	+	ENSSSCT00000065533	ENSSSCG00000010816	TGFB2
circTGFBR1	1	240889405	240900266	+	ENSSSCT00000026821	ENSSSCG00000005382	TGFBR1
circTGFBR3_1	4	125271502	125286552	+	ENSSSCT00000033701	ENSSSCG00000006911	TGFBR3
circTGFBR3_2	4	125282946	125297628	+	ENSSSCT00000033701	ENSSSCG00000006911	TGFBR3
circTGFBR3_3	4	125282946	125286552	+	ENSSSCT00000033701	ENSSSCG00000006911	TGFBR3
circTGFBR3_4	4	125259957	125266835	+	ENSSSCT00000033701	ENSSSCG00000006911	TGFBR3
circTGFBRAP1	3	49493942	49496419	+	ENSSSCT00000054122	ENSSSCG00000024636	TGFBRAP1
circTHOC2	X	101206740	101209539	-	ENSSSCT00000013820	ENSSSCG00000012639	THOC2
circTHUMPD3	13	65723022	65724436	+	ENSSSCT00000012632	ENSSSCG00000011542	THUMPD3
circTIA1_1	3	72257085	72262713	+	ENSSSCT00000027073	ENSSSCG00000023409	TIA1
circTIA1_2	3	72262637	72270592	+	ENSSSCT00000027073	ENSSSCG00000023409	TIA1
circTIPRL	4	82779058	82785563	-	ENSSSCT00000006906	ENSSSCG00000006301	TIPRL
circTLK1_1	15	77203627	77283482	-	ENSSSCT00000061621	ENSSSCG00000015944	TLK1
circTLK1_2	15	77219096	77283482	-	ENSSSCT00000061621	ENSSSCG00000015944	TLK1
circTLK1_3	15	77251048	77283482	-	ENSSSCT00000017361	ENSSSCG00000015944	TLK1
circTLK2_1	12	16172825	16181569	-	ENSSSCT00000041301	ENSSSCG00000017301	TLK2
circTLK2_2	12	16209069	16211961	-	ENSSSCT00000041301	ENSSSCG00000017301	TLK2
circTM9SF3	14	107993200	108013871	-	ENSSSCT00000011498	ENSSSCG00000010508	TM9SF3
circTMEM120B	14	30929858	30936150	-	ENSSSCT00000056089	ENSSSCG00000009808	TMEM120B
circTMEM127	3	47004816	47007823	+	ENSSSCT00000037184	ENSSSCG00000034105	TMEM127
circTMEM131	3	56412686	56418914	+	ENSSSCT00000058227	ENSSSCG00000008192	TMEM131
circTMEM135	9	20809497	20833620	+	ENSSSCT00000039023	ENSSSCG00000035619	TMEM135
circTMEM237	15	105263578	105266463	-	ENSSSCT00000046636	ENSSSCG00000035161	TMEM237
circTMEM245	1	250097103	250139692	-	ENSSSCT00000045926	ENSSSCG00000005444	TMEM245
circTMEM39A	13	140805617	140817139	+	ENSSSCT00000013023	ENSSSCG00000011901	TMEM39A
circTMEM43	13	70406476	70408175	-	ENSSSCT00000012700	ENSSSCG00000011603	TMEM43
circTMEM50B	13	197055404	197067577	-	ENSSSCT00000039718	ENSSSCG00000034624	TMEM50B
circTMEM56_1	4	122275846	122285360	-	ENSSSCT00000059442	ENSSSCG00000039854	TMEM56
circTMEM56_2	4	122253259	122285360	-	ENSSSCT00000059442	ENSSSCG00000039854	TMEM56
circTMEM65	4	15288793	15303961	+	ENSSSCT00000054295	ENSSSCG00000040731	TMEM65
circTMOD3	1	119871909	119905302	-	ENSSSCT00000059120	ENSSSCG00000004626	TMOD3
circTMTC3	5	94345442	94375527	-	ENSSSCT00000058626	ENSSSCG00000000927	TMTC3
circTNFRSF21_1	7	42064667	42065162	-	ENSSSCT00000035929	ENSSSCG00000001727	TNFRSF21
circTNFRSF21_2	7	42064667	42067500	-	ENSSSCT00000035929	ENSSSCG00000001727	TNFRSF21
circTNS3_1	18	49086170	49087202	+	ENSSSCT00000054749	ENSSSCG00000016725	TNS3
circTNS3_2	18	49136963	49138334	+	ENSSSCT00000054749	ENSSSCG00000016725	TNS3
circTOGARAM1	1	175244213	175246746	+	ENSSSCT00000025268	ENSSSCG00000027765	TOGARAM1
circTOP1	17	43775145	43777223	+	ENSSSCT00000029351	ENSSSCG00000007355	TOP1
circTRAF3IP1	15	137883501	137892318	+	ENSSSCT00000023435	ENSSSCG00000025228	TRAF3IP1
circTRAM1	4	64777338	64782122	+	ENSSSCT00000038996	ENSSSCG00000006193	TRAM1
circTRAPPC10_1	13	206986083	206990757	+	ENSSSCT00000065830	ENSSSCG00000039085	TRAPPC10
circTRAPPC10_2	13	206959482	206962457	+	ENSSSCT00000065830	ENSSSCG00000039085	TRAPPC10
circTRAPPC10_3	13	206959482	206970402	+	ENSSSCT00000065830	ENSSSCG00000039085	TRAPPC10
circTRAPPC11	15	45021867	45035364	+	ENSSSCT00000017178	ENSSSCG00000015777	TRAPPC11
circTRAPPC8	6	115740726	115760548	-	ENSSSCT00000065819	ENSSSCG00000003728	TRAPPC8
circTRAPPC9	4	3108314	3137676	+	ENSSSCT00000006515	ENSSSCG00000005934	TRAPPC9
circTRDMT1	10	43443983	43446589	-	ENSSSCT00000030385	ENSSSCG00000021309	TRDMT1
circTRIM2	8	75807144	75826751	-	ENSSSCT00000044920	ENSSSCG00000029200	TRIM2
circTRIM33	4	106159829	106162890	+	ENSSSCT00000007402	ENSSSCG00000006757	TRIM33
circTRIP11	7	113567288	113574661	-	ENSSSCT00000044128	ENSSSCG00000002445	TRIP11
circTRIP12_1	15	130875216	130894869	-	ENSSSCT00000037953	ENSSSCG00000024373	TRIP12
circTRIP12_2	15	130853866	130894869	-	ENSSSCT00000037953	ENSSSCG00000024373	TRIP12
circTRMT11	1	36964150	36994867	-	ENSSSCT00000051154	ENSSSCG00000004220	TRMT11
circTRPM7_1	1	121217325	121230821	+	ENSSSCT00000055327	ENSSSCG00000004636	TRPM7
circTRPM7_2	1	121217325	121228255	+	ENSSSCT00000055327	ENSSSCG00000004636	TRPM7
circTRPM7_3	1	121217325	121235683	+	ENSSSCT00000055327	ENSSSCG00000004636	TRPM7
circTRPM7_4	1	121220382	121243452	+	ENSSSCT00000055327	ENSSSCG00000004636	TRPM7
circTRPM7_5	1	121217325	121238262	+	ENSSSCT00000055327	ENSSSCG00000004636	TRPM7
circTRPM7_6	1	121160752	121179866	+	ENSSSCT00000055327	ENSSSCG00000004636	TRPM7
circTRPM7_7	1	121192912	121197117	+	ENSSSCT00000059656	ENSSSCG00000004636	TRPM7
circTRPS1_1	4	22954973	22990287	+	ENSSSCT00000054515	ENSSSCG00000006018	TRPS1
circTRPS1_2	4	22972358	22973488	+	ENSSSCT00000006604	ENSSSCG00000006018	TRPS1
circTRPS1_3	4	22972358	22990287	+	ENSSSCT00000006604	ENSSSCG00000006018	TRPS1
circTTC13	14	59432074	59439450	+	ENSSSCT00000048649	ENSSSCG00000010180	TTC13
circTTC17	2	18842098	18845963	-	ENSSSCT00000061124	ENSSSCG00000013284	TTC17
circTTC21B	15	72462369	72492446	-	ENSSSCT00000017321	ENSSSCG00000015908	TTC21B
circTTC3_1	13	200707865	200731785	+	ENSSSCT00000058719	ENSSSCG00000012062	TTC3
circTTC3_2	13	200707865	200718953	+	ENSSSCT00000058719	ENSSSCG00000012062	TTC3
circTTC3_3	13	200731730	200759988	+	ENSSSCT00000058719	ENSSSCG00000012062	TTC3
circTTC4	6	157642375	157643996	-	ENSSSCT00000041110	ENSSSCG00000003844	TTC4
circTTL	3	44008061	44018329	-	ENSSSCT00000008870	ENSSSCG00000008097	TTL
circTTLL5	7	98840581	98844301	+	ENSSSCT00000002651	ENSSSCG00000025984	TTLL5
circTUT7	10	29037749	29038934	+	ENSSSCT00000035632	ENSSSCG00000010952	TUT7
circTXN2	5	11265442	11268764	+	ENSSSCT00000000150	ENSSSCG00000000144	TXN2
circTXNDC16_1	1	182184847	182194969	-	ENSSSCT00000052025	ENSSSCG00000035934	TXNDC16
circTXNDC16_2	1	182134579	182139525	-	ENSSSCT00000045130	ENSSSCG00000035934	TXNDC16
circUBA2	6	44131595	44136685	+	ENSSSCT00000050685	ENSSSCG00000031169	UBA2
circUBAP1	10	32569927	32576571	-	ENSSSCT00000012021	ENSSSCG00000021761	UBAP1
circUBAP2_1	10	32859213	32870103	+	ENSSSCT00000012026	ENSSSCG00000010987	UBAP2
circUBAP2_2	10	32800583	32827084	+	ENSSSCT00000059696	ENSSSCG00000010987	UBAP2
circUBAP2_3	10	32800583	32819154	+	ENSSSCT00000059696	ENSSSCG00000010987	UBAP2
circUBAP2L	4	95495265	95506243	-	ENSSSCT00000047263	ENSSSCG00000006553	UBAP2L
circUBE2D1	14	92300011	92309354	-	ENSSSCT00000058440	ENSSSCG00000033323	UBE2D1
circUBE2D2	2	141450454	141457233	+	ENSSSCT00000050070	ENSSSCG00000036711	UBE2D2
circUBE2J2	6	63557492	63558219	-	ENSSSCT00000003701	ENSSSCG00000003334	UBE2J2
circUBE2K_1	8	30920208	30938242	+	ENSSSCT00000059455	ENSSSCG00000033602	UBE2K
circUBE2K_2	8	30920208	30953839	+	ENSSSCT00000059455	ENSSSCG00000033602	UBE2K
circUBE3A	1	141920483	141927044	+	ENSSSCT00000048664	ENSSSCG00000004832	UBE3A
circUBE3B	14	41428539	41438049	-	ENSSSCT00000049805	ENSSSCG00000009933	UBE3B
circUBE3C	18	1589911	1592709	-	ENSSSCT00000017866	ENSSSCG00000016409	UBE3C
circUBE4B	6	70383717	70407992	+	ENSSSCT00000024710	ENSSSCG00000003398	UBE4B
circUBR2	7	37692014	37694445	+	ENSSSCT00000001825	ENSSSCG00000001641	UBR2
circUBR3	15	76166994	76177857	+	ENSSSCT00000017356	ENSSSCG00000015940	UBR3
circUBR5_1	4	34692207	34694291	+	ENSSSCT00000064677	ENSSSCG00000022479	UBR5
circUBR5_2	4	34768970	34777538	+	ENSSSCT00000064677	ENSSSCG00000022479	UBR5
circUBR7	7	114594353	114596124	+	ENSSSCT00000042647	ENSSSCG00000002460	UBR7
circUCHL3	11	47849407	47884140	+	ENSSSCT00000010377	ENSSSCG00000009466	UCHL3
circUCK2	4	84860815	84861880	-	ENSSSCT00000048266	ENSSSCG00000039867	UCK2
circUGGT1_1	15	59180556	59185795	-	ENSSSCT00000017266	ENSSSCG00000015857	UGGT1
circUGGT1_2	15	59164160	59185795	-	ENSSSCT00000017266	ENSSSCG00000015857	UGGT1
circUGGT1_3	15	59200872	59230432	-	ENSSSCT00000017266	ENSSSCG00000015857	UGGT1
circUGP2	3	78013713	78014790	-	ENSSSCT00000063992	ENSSSCG00000008368	UGP2
circUHRF1BP1L	5	84007998	84034579	+	ENSSSCT00000062521	ENSSSCG00000026697	UHRF1BP1L
circUIMC1	2	80985214	80992288	+	ENSSSCT00000047859	ENSSSCG00000022508	UIMC1
circULK2	12	59821852	59839936	+	ENSSSCT00000019640	ENSSSCG00000018045	ULK2
circULK4_1	13	25705005	25715600	-	ENSSSCT00000064110	ENSSSCG00000025408	ULK4
circULK4_2	13	25708750	25715600	-	ENSSSCT00000064110	ENSSSCG00000025408	ULK4
circUNC13B	1	236043217	236061313	+	ENSSSCT00000026971	ENSSSCG00000005305	UNC13B
circUNKL	3	40456608	40457300	+	ENSSSCT00000032550	ENSSSCG00000022963	UNKL
circUPF2_1	10	59913524	59919743	+	ENSSSCT00000059021	ENSSSCG00000011117	UPF2
circUPF2_2	10	59913524	59926809	+	ENSSSCT00000059021	ENSSSCG00000011117	UPF2
circUSO1	8	71436664	71437764	+	ENSSSCT00000062382	ENSSSCG00000008971	USO1
circUSP10	6	4003873	4015029	-	ENSSSCT00000002961	ENSSSCG00000002670	USP10
circUSP24_1	6	157280252	157282222	+	ENSSSCT00000024705	ENSSSCG00000029633	USP24
circUSP24_2	6	157293186	157294263	+	ENSSSCT00000024705	ENSSSCG00000029633	USP24
circUSP24_3	6	157281815	157282222	+	ENSSSCT00000024705	ENSSSCG00000029633	USP24
circUSP3_1	1	108482615	108486823	-	ENSSSCT00000055085	ENSSSCG00000028737	USP3
circUSP3_2	1	108447645	108486823	-	ENSSSCT00000055085	ENSSSCG00000028737	USP3
circUSP3_3	1	108459470	108486823	-	ENSSSCT00000055085	ENSSSCG00000028737	USP3
circUSP34	3	80371235	80390801	+	ENSSSCT00000028791	ENSSSCG00000008382	USP34
circUSP37	15	120544164	120558909	-	ENSSSCT00000048145	ENSSSCG00000016194	USP37
circUSP4	13	31891049	31894444	-	ENSSSCT00000059156	ENSSSCG00000011382	USP4
circUSP40	15	133924879	133929332	-	ENSSSCT00000017757	ENSSSCG00000016306	USP40
circUSP47_1	2	47486152	47489786	-	ENSSSCT00000014642	ENSSSCG00000013402	USP47
circUSP47_2	2	47486152	47491725	-	ENSSSCT00000014642	ENSSSCG00000013402	USP47
circUSP54	14	76369983	76377709	-	ENSSSCT00000055274	ENSSSCG00000010302	USP54
circUSP7	3	33789130	33791943	+	ENSSSCT00000008664	ENSSSCG00000007907	USP7
circUSP8	1	121330341	121335034	-	ENSSSCT00000005124	ENSSSCG00000004639	USP8
circUTP18	12	27531354	27538247	+	ENSSSCT00000019154	ENSSSCG00000017593	UTP18
circUTRN	1	20908951	20913116	-	ENSSSCT00000061166	ENSSSCG00000004123	UTRN
circUXS1	3	48893038	48909045	+	ENSSSCT00000008920	ENSSSCG00000008143	UXS1
circVAPA	6	98229605	98233063	-	ENSSSCT00000061774	ENSSSCG00000038465	VAPA
circVASH2	9	130496403	130497071	-	ENSSSCT00000016982	ENSSSCG00000015589	VASH2
circVAV1	2	72336163	72337754	-	ENSSSCT00000039776	ENSSSCG00000013553	VAV1
circVAV2	1	273342080	273347767	-	ENSSSCT00000006315	ENSSSCG00000005743	VAV2
circVCAN	2	91768019	91773257	+	ENSSSCT00000015440	ENSSSCG00000014136	VCAN
circVDR	5	78209956	78210379	-	ENSSSCT00000064352	ENSSSCG00000020864	VDR
circVPS13B	4	37132786	37133604	-	ENSSSCT00000006662	ENSSSCG00000006071	VPS13B
circVPS33B	7	55863608	55864157	+	ENSSSCT00000064224	ENSSSCG00000033954	VPS33B
circVPS35_1	6	37957474	37961977	+	ENSSSCT00000023228	ENSSSCG00000026239	VPS35
circVPS35_2	6	37957474	37968385	+	ENSSSCT00000023228	ENSSSCG00000026239	VPS35
circVPS35_3	6	37957474	37965423	+	ENSSSCT00000023228	ENSSSCG00000026239	VPS35
circVPS35_4	6	37957474	37959217	+	ENSSSCT00000023228	ENSSSCG00000026239	VPS35
circVPS35_5	6	37957474	37962774	+	ENSSSCT00000023228	ENSSSCG00000026239	VPS35
circVPS50_6	9	73094594	73126973	+	ENSSSCT00000025363	ENSSSCG00000022982	VPS50
circVWA8	11	25318968	25343890	+	ENSSSCT00000038025	ENSSSCG00000029837	VWA8
circWAPL	14	87557329	87560723	-	ENSSSCT00000051558	ENSSSCG00000010357	WAPL
circWASF3	11	4338230	4345913	+	ENSSSCT00000010188	ENSSSCG00000009300	WASF3
circWASHC4	5	79458762	79460620	-	ENSSSCT00000000914	ENSSSCG00000000840	WASHC4
circWASHC5	4	14657438	14659096	+	ENSSSCT00000006552	ENSSSCG00000005969	WASHC5
circWBP4	11	25749778	25761445	-	ENSSSCT00000054531	ENSSSCG00000031627	WBP4
circWDFY2	11	16094633	16116109	-	ENSSSCT00000059394	ENSSSCG00000040538	WDFY2
circWDFY3	8	133838808	133841340	+	ENSSSCT00000010109	ENSSSCG00000009230	WDFY3
circWDR27	1	641933	653683	+	ENSSSCT00000004431	ENSSSCG00000004008	WDR27
circWDR33	15	59562523	59570339	+	ENSSSCT00000017272	ENSSSCG00000015861	WDR33
circWDR36	2	115894553	115897120	+	ENSSSCT00000051417	ENSSSCG00000014199	WDR36
circWDR37_1	10	68509411	68518239	-	ENSSSCT00000066425	ENSSSCG00000029602	WDR37
circWDR37_2	10	68491182	68518239	-	ENSSSCT00000066425	ENSSSCG00000029602	WDR37
circWDR37_3	10	68512777	68518239	-	ENSSSCT00000066425	ENSSSCG00000029602	WDR37
circWDR48	13	23774622	23781254	+	ENSSSCT00000065490	ENSSSCG00000011261	WDR48
circWDR7_1	1	106148089	106150609	+	ENSSSCT00000039131	ENSSSCG00000004538	WDR7
circWDR7_2	1	106150520	106171073	+	ENSSSCT00000039131	ENSSSCG00000004538	WDR7
circWDR75_1	15	93992833	94001331	+	ENSSSCT00000017461	ENSSSCG00000016036	WDR75
circWDR75_2	15	94016852	94019208	+	ENSSSCT00000017461	ENSSSCG00000016036	WDR75
circWIPI2	3	3820155	3822636	+	ENSSSCT00000038170	ENSSSCG00000007580	WIPI2
circWNK1	5	68106935	68113748	+	ENSSSCT00000038423	ENSSSCG00000000753	WNK1
circWWOX	6	9860418	9864561	-	ENSSSCT00000027541	ENSSSCG00000027415	WWOX
circWWP1_1	4	50433433	50447885	-	ENSSSCT00000006730	ENSSSCG00000006137	WWP1
circWWP1_2	4	50402449	50418702	-	ENSSSCT00000006730	ENSSSCG00000006137	WWP1
circWWP1_3	4	50408309	50418702	-	ENSSSCT00000006730	ENSSSCG00000006137	WWP1
circXDH_1	3	108039821	108041488	+	ENSSSCT00000045303	ENSSSCG00000008522	XDH
circXDH_2	3	108040826	108041488	+	ENSSSCT00000045303	ENSSSCG00000008522	XDH
circXPC	13	70364296	70372547	+	ENSSSCT00000012699	ENSSSCG00000011602	XPC
circXPO4	11	1141223	1141776	-	ENSSSCT00000051789	ENSSSCG00000009276	XPO4
circXPO6	3	18826736	18830614	+	ENSSSCT00000008560	ENSSSCG00000007812	XPO6
circXPOT_1	5	28850612	28858296	+	ENSSSCT00000049535	ENSSSCG00000000466	XPOT
circXPOT_2	5	28846155	28847621	+	ENSSSCT00000049535	ENSSSCG00000000466	XPOT
circXRN2	17	29125249	29139821	+	ENSSSCT00000007781	ENSSSCG00000007109	XRN2
circYAP1	9	32902789	32920023	+	ENSSSCT00000040218	ENSSSCG00000031429	YAP1
circYEATS2	13	121699728	121700467	+	ENSSSCT00000046642	ENSSSCG00000011776	YEATS2
circYES1	6	105568058	105588590	+	ENSSSCT00000042627	ENSSSCG00000031942	YES1
circYIPF5	2	145659863	145661001	-	ENSSSCT00000049993	ENSSSCG00000039309	YIPF5
circYME1L1	10	48814822	48820979	-	ENSSSCT00000064510	ENSSSCG00000011066	YME1L1
circYTHDC2	2	118058167	118066426	+	ENSSSCT00000015529	ENSSSCG00000014211	YTHDC2
circYTHDF3	4	70910190	70911789	-	ENSSSCT00000041046	ENSSSCG00000033144	YTHDF3
circZBTB44	9	56972612	56973685	-	ENSSSCT00000037739	ENSSSCG00000015247	ZBTB44
circZC3H14	7	110469770	110477351	+	ENSSSCT00000041602	ENSSSCG00000002426	ZC3H14
circZC3H15	15	91510897	91514202	+	ENSSSCT00000017451	ENSSSCG00000016026	ZC3H15
circZC3H18_1	6	1051421	1057079	-	ENSSSCT00000046191	ENSSSCG00000035967	ZC3H18
circZC3H18_2	6	1051421	1066371	-	ENSSSCT00000046191	ENSSSCG00000035967	ZC3H18
circZC3H6_1	3	44109595	44122061	-	ENSSSCT00000041159	ENSSSCG00000008096	ZC3H6
circZC3H6_2	3	44102880	44122061	-	ENSSSCT00000041159	ENSSSCG00000008096	ZC3H6
circZC3H7A_1	3	31358569	31359294	+	ENSSSCT00000008651	ENSSSCG00000007895	ZC3H7A
circZC3H7A_2	3	31360594	31361255	+	ENSSSCT00000008651	ENSSSCG00000007895	ZC3H7A
circZCCHC7	1	238015228	238018002	+	ENSSSCT00000005885	ENSSSCG00000005346	ZCCHC7
circZDHHC20_1	11	1364577	1371291	-	ENSSSCT00000050830	ENSSSCG00000026744	ZDHHC20
circZDHHC20_2	11	1355227	1376231	-	ENSSSCT00000050830	ENSSSCG00000026744	ZDHHC20
circZDHHC7	6	3813862	3814709	+	ENSSSCT00000002958	ENSSSCG00000002667	ZDHHC7
circZFAND3	7	33634072	33654408	+	ENSSSCT00000040605	ENSSSCG00000039952	ZFAND3
circZFC3H1_1	5	35635563	35638764	-	ENSSSCT00000039112	ENSSSCG00000000509	ZFC3H1
circZFC3H1_2	5	35648530	35649101	-	ENSSSCT00000039112	ENSSSCG00000000509	ZFC3H1
circZFC3H1_3	5	35632405	35633470	-	ENSSSCT00000039112	ENSSSCG00000000509	ZFC3H1
circZFC3H1_4	5	35635563	35640848	-	ENSSSCT00000039112	ENSSSCG00000000509	ZFC3H1
circZFR	16	18590467	18633434	-	ENSSSCT00000029135	ENSSSCG00000027681	ZFR
circZFX	X	20243401	20247157	+	ENSSSCT00000027404	ENSSSCG00000021322	ZFX
circZFYVE26	7	91547493	91548524	-	ENSSSCT00000002559	ENSSSCG00000002298	ZFYVE26
circZHX1	4	16108247	16121954	+	ENSSSCT00000037816	ENSSSCG00000005984	ZHX1
circZKSCAN1	3	7928956	7929871	+	ENSSSCT00000054086	ENSSSCG00000031461	ZKSCAN1
circZMYM2_1	11	675688	676545	+	ENSSSCT00000045548	ENSSSCG00000021814	ZMYM2
circZMYM2_2	11	713799	714610	+	ENSSSCT00000045548	ENSSSCG00000021814	ZMYM2
circZMYM2_3	11	675688	686516	+	ENSSSCT00000045548	ENSSSCG00000021814	ZMYM2
circZMYM2_4	11	675688	683082	+	ENSSSCT00000045548	ENSSSCG00000021814	ZMYM2
circZMYM4_1	6	91566040	91576562	+	ENSSSCT00000060786	ENSSSCG00000003627	ZMYM4
circZMYM4_2	6	91537802	91540596	+	ENSSSCT00000060786	ENSSSCG00000003627	ZMYM4
circZMYM4_3	6	91566040	91575552	+	ENSSSCT00000060786	ENSSSCG00000003627	ZMYM4
circZMYM4_4	6	91593752	91605991	+	ENSSSCT00000060786	ENSSSCG00000003627	ZMYM4
circZMYM5	11	603752	604571	-	ENSSSCT00000060422	ENSSSCG00000009568	ZMYM5
circZMYND11_1	10	69201375	69235186	-	ENSSSCT00000060375	ENSSSCG00000011166	ZMYND11
circZMYND11_2	10	69212793	69235186	-	ENSSSCT00000042795	ENSSSCG00000011166	ZMYND11
circZNF143	9	73717	77619	-	ENSSSCT00000032233	ENSSSCG00000022070	ZNF143
circZNF148_1	13	135007590	135020313	+	ENSSSCT00000060773	ENSSSCG00000011858	ZNF148
circZNF148_2	13	134998505	135020313	+	ENSSSCT00000060773	ENSSSCG00000011858	ZNF148
circZNF207	12	42589974	42596350	-	ENSSSCT00000045827	ENSSSCG00000017732	ZNF207
circZNF236_1	1	147750271	147767245	-	ENSSSCT00000048749	ENSSSCG00000023533	ZNF236
circZNF236_2	1	147765751	147767245	-	ENSSSCT00000048749	ENSSSCG00000023533	ZNF236
circZNF292	1	55666251	55669095	+	ENSSSCT00000065061	ENSSSCG00000035281	ZNF292
circZNF37A	14	60813333	60813820	-	ENSSSCT00000044725	ENSSSCG00000031589	ZNF37A
circZNF395	14	12140804	12143946	-	ENSSSCT00000041621	ENSSSCG00000009676	ZNF395
circZNF532_1	1	161909789	161924707	-	ENSSSCT00000041916	ENSSSCG00000034704	ZNF532
circZNF532_2	1	161936898	161939261	-	ENSSSCT00000041916	ENSSSCG00000034704	ZNF532
circZNF532_3	1	161909789	161920459	-	ENSSSCT00000041916	ENSSSCG00000034704	ZNF532
circZNF566	6	45903455	45907174	+	ENSSSCT00000003242	ENSSSCG00000029170	ZNF566
circZNF568	6	46104857	46105348	-	ENSSSCT00000055356	ENSSSCG00000002935	ZNF568
circZNF609	1	107552364	107553238	-	ENSSSCT00000040122	ENSSSCG00000004551	ZNF609
circZNF644_1	4	125831439	125835266	+	ENSSSCT00000061126	ENSSSCG00000022534	ZNF644
circZNF644_2	4	125783659	125835266	+	ENSSSCT00000061126	ENSSSCG00000022534	ZNF644
circZNF644_3	4	125831439	125853740	+	ENSSSCT00000061126	ENSSSCG00000022534	ZNF644
circZNF654	13	167824034	167842322	-	ENSSSCT00000045660	ENSSSCG00000036885	ZNF654
circZNF713	3	16964039	16964840	-	ENSSSCT00000027523	ENSSSCG00000029029	ZNF713
circZNF827	8	82698450	82719341	+	ENSSSCT00000054584	ENSSSCG00000009037	ZNF827
circZNFX1	17	50931698	50933570	-	ENSSSCT00000030602	ENSSSCG00000030108	ZNFX1
circZRANB1	14	134280156	134282673	+	ENSSSCT00000011750	ENSSSCG00000010738	ZRANB1
circZSWIM6_1	16	40251240	40253338	+	ENSSSCT00000030260	ENSSSCG00000025194	ZSWIM6
circZSWIM6_2	16	40231896	40253338	+	ENSSSCT00000030260	ENSSSCG00000025194	ZSWIM6
circZZZ3_1	6	135719849	135735994	+	ENSSSCT00000061129	ENSSSCG00000003772	ZZZ3
circZZZ3_2	6	135651326	135659362	+	ENSSSCT00000042580	ENSSSCG00000003772	ZZZ3
circZZZ3_3	6	135651326	135660627	+	ENSSSCT00000061129	ENSSSCG00000003772	ZZZ3

## Sheet: B
Differently expressed circRNAs between NS and HS
Name	NS_1_clean	NS_2_clean	NS_3_clean	HS_1_clean	HS_2_clean	HS_3_clean	NS_1_clean_normalization	NS_2_clean_normalization	NS_3_clean_normalization	HS_1_clean_normalization	HS_2_clean_normalization	HS_3_clean_normalization	logFC	P value
circAASDH	0	0	1	0	4	4	0	0	251.067	0	1369.86	1212.49	2.84906	0.130242
circABCA1	0	0	1	0	0	0	0	0	251.067	0	0	0	-1.79518	1
circABCA13	0	4	0	3	0	0	0	1006.04	0	869.313	0	0	-0.182912	1
circABCA6	1	1	0	1	0	1	299.85	251.509	0	289.771	0	303.122	0.188576	1
circABL2	0	0	0	1	0	1	0	0	0	289.771	0	303.122	2.76148	0.50011
circABLIM2	0	0	1	0	2	1	0	0	251.067	0	684.932	303.122	1.49045	0.641416
circACACA_1	0	0	0	1	0	1	0	0	0	289.771	0	303.122	2.76148	0.50011
circACACA_2	1	0	1	0	0	0	299.85	0	251.067	0	0	0	-2.57299	0.50033
circACACA_3	0	0	0	0	1	0	0	0	0	0	342.466	0	1.96574	1
circACACA_4	5	3	5	1	8	5	1499.25	754.527	1255.34	289.771	2739.73	1515.61	0.345045	0.699917
circACACA_5	0	1	0	1	0	0	0	251.509	0	289.771	0	0	0.162475	1
circACADM	0	1	0	0	1	1	0	251.509	0	0	342.466	303.122	0.964629	1
circACAP2	1	2	0	1	0	1	299.85	503.018	0	289.771	0	303.122	-0.313178	1
circACAT1	0	0	3	0	0	0	0	0	753.201	0	0	0	-3.029	0.419947
circACBD5	1	2	1	1	0	0	299.85	503.018	251.067	289.771	0	0	-1.48626	0.375275
circACSL3_1	3	1	0	0	0	0	899.55	251.509	0	0	0	0	-3.49632	0.197441
circACSL3_2	1	1	6	0	1	1	299.85	251.509	1506.4	0	342.466	303.122	-1.58229	0.29386
circACSL3_3	2	8	6	1	4	3	599.7	2012.07	1506.4	289.771	1369.86	909.366	-0.730034	0.373524
circACSL3_4	0	0	1	1	0	1	0	0	251.067	289.771	0	303.122	0.964526	1
circACSL3_5	0	1	1	1	0	1	0	251.509	251.067	289.771	0	303.122	0.188685	1
circACSL6_1	3	1	1	1	0	0	899.55	251.509	251.067	289.771	0	0	-1.79146	0.234773
circACSL6_2	0	0	0	1	0	1	0	0	0	289.771	0	303.122	2.76148	0.50011
circACSL6_3	2	0	0	0	0	0	599.7	0	0	0	0	0	-2.64132	0.57471
circACSL6_4	0	1	0	1	0	1	0	251.509	0	289.771	0	303.122	0.964525	1
circACSS3_1	0	0	0	0	2	2	0	0	0	0	684.932	606.244	3.66014	0.142512
circACSS3_2	0	0	4	0	0	0	0	0	1004.27	0	0	0	-3.39009	0.364287
circACSS3_3	3	0	0	0	0	0	899.55	0	0	0	0	0	-3.18695	0.448697
circACSS3_4	0	0	0	0	1	0	0	0	0	0	342.466	0	1.96574	1
circACTR3B_1	0	0	0	0	1	1	0	0	0	0	342.466	303.122	2.76169	0.500328
circACTR3B_2	0	0	0	0	1	0	0	0	0	0	342.466	0	1.96574	1
circACVR1	0	0	1	0	0	0	0	0	251.067	0	0	0	-1.79518	1
circACVR2A	1	0	2	0	0	0	299.85	0	502.134	0	0	0	-3.07493	0.254232
circADAM17_1	0	0	1	0	0	0	0	0	251.067	0	0	0	-1.79518	1
circADAM17_2	1	0	0	0	0	0	299.85	0	0	0	0	0	-1.80267	1
circADAMTS12	0	2	1	3	0	1	0	503.018	251.067	869.313	0	303.122	0.571059	1
circADAMTS9	0	0	0	0	1	0	0	0	0	0	342.466	0	1.96574	1
circADAT1_1	0	0	1	0	0	0	0	0	251.067	0	0	0	-1.79518	1
circADCY1_2	3	1	2	0	0	0	899.55	251.509	502.134	0	0	0	-3.98651	0.0313532
circADCY1_3	1	0	14	0	0	0	299.85	0	3514.94	0	0	0	-5.19673	0.103175
circADCY1_4	0	0	2	0	0	0	0	0	502.134	0	0	0	-2.54964	0.554077
circADCY1_5	0	0	1	1	1	0	0	0	251.067	289.771	342.466	0	0.964601	1
circADGRA3	0	0	1	0	2	0	0	0	251.067	0	684.932	0	1.04188	1
circADGRG6_1	0	0	1	1	0	0	0	0	251.067	289.771	0	0	0.162537	1
circADGRG6_2	0	0	1	0	0	0	0	0	251.067	0	0	0	-1.79518	1
circADGRG6_3	0	2	1	0	2	1	0	503.018	251.067	0	684.932	303.122	0.213385	1
circADPRM	0	2	3	1	2	2	0	503.018	753.201	289.771	684.932	606.244	0.208595	1
circAFDN_1	3	0	3	0	0	0	899.55	0	753.201	0	0	0	-4.00917	0.067224
circAFDN_2	0	1	1	0	0	0	0	251.509	251.067	0	0	0	-2.57269	0.500296
circAFDN_3	9	6	5	6	3	6	2698.65	1509.05	1255.34	1738.63	1027.4	1818.73	-0.187496	0.736861
circAFF2	0	1	0	3	0	1	0	251.509	0	869.313	0	303.122	1.83617	0.443782
circAFG1L	0	0	0	0	1	1	0	0	0	0	342.466	303.122	2.76169	0.500328
circAFTPH	1	2	0	0	0	0	299.85	503.018	0	0	0	0	-3.07499	0.254278
circAGAP1_1	0	0	1	3	2	3	0	0	251.067	869.313	684.932	909.366	2.79545	0.0392483
circAGAP1_2	0	1	0	0	1	0	0	251.509	0	0	342.466	0	0.170193	1
circAGBL2	0	2	0	2	1	3	0	503.018	0	579.542	342.466	909.366	1.62434	0.289495
circAGK	3	0	0	0	0	0	899.55	0	0	0	0	0	-3.18695	0.448697
circAGL_1	0	0	3	0	0	0	0	0	753.201	0	0	0	-3.029	0.419947
circAGL_2	1	1	1	0	1	0	299.85	251.509	251.067	0	342.466	0	-1.11461	0.625165
circAGO3	0	0	1	2	0	0	0	0	251.067	579.542	0	0	0.948413	1
circAKAP10	0	0	2	0	0	0	0	0	502.134	0	0	0	-2.54964	0.554077
circAKAP11	2	0	1	1	1	1	599.7	0	251.067	289.771	342.466	303.122	0.199021	1
circAKAP6	0	0	0	0	3	2	0	0	0	0	1027.4	606.244	3.98262	0.113764
circALCAM	1	1	0	0	0	0	299.85	251.509	0	0	0	0	-2.573	0.50033
circALDH7A1	0	0	0	1	1	0	0	0	0	289.771	342.466	0	2.76159	0.500299
circALMS1_1	0	1	0	1	2	3	0	251.509	0	289.771	684.932	909.366	2.40029	0.125289
circALMS1_2	2	0	0	1	0	1	599.7	0	0	289.771	0	303.122	0.149073	1
circAMBRA1_1	2	0	2	0	0	0	599.7	0	502.134	0	0	0	-3.45019	0.133067
circAMBRA1_2	1	0	0	0	1	0	299.85	0	0	0	342.466	0	0.161666	1
circAMBRA1_3	0	0	1	0	1	0	0	0	251.067	0	342.466	0	0.170268	1
circAMDHD1	0	0	0	1	0	1	0	0	0	289.771	0	303.122	2.76148	0.50011
circAMN1	0	3	2	3	1	2	0	754.527	502.134	869.313	342.466	606.244	0.455837	0.754177
circAMOTL1	0	1	0	2	1	2	0	251.509	0	579.542	342.466	606.244	2.15281	0.219059
circANAPC1	1	0	1	0	0	0	299.85	0	251.067	0	0	0	-2.57299	0.50033
circANKFY1	3	4	1	1	1	1	899.55	1006.04	251.067	289.771	342.466	303.122	-1.10476	0.227129
circANKHD1	0	2	0	0	0	0	0	503.018	0	0	0	0	-2.55037	0.554268
circANKIB1	0	0	0	1	0	1	0	0	0	289.771	0	303.122	2.76148	0.50011
circANKRD12_1	4	1	1	2	1	2	1199.4	251.509	251.067	579.542	342.466	606.244	-0.0449382	1
circANKRD12_2	1	0	1	1	1	0	299.85	0	251.067	289.771	342.466	0	0.188651	1
circANKRD13C	1	0	1	0	0	0	299.85	0	251.067	0	0	0	-2.57299	0.50033
circANKRD17	1	1	1	3	3	2	299.85	251.509	251.067	869.313	1027.4	606.244	1.51782	0.146528
circANKRD42_1	0	0	1	1	3	1	0	0	251.067	289.771	1027.4	303.122	2.15864	0.230072
circANKRD42_2	0	0	0	1	0	0	0	0	0	289.771	0	0	1.9573	1
circANKRD44	0	0	0	0	1	1	0	0	0	0	342.466	303.122	2.76169	0.500328
circANTXR2	1	1	2	1	1	2	299.85	251.509	502.134	289.771	342.466	606.244	0.204827	1
circANXA4	0	0	2	0	0	0	0	0	502.134	0	0	0	-2.54964	0.554077
circAP1G1	0	0	1	0	0	0	0	0	251.067	0	0	0	-1.79518	1
circAP2A1	6	0	7	1	4	3	1799.1	0	1757.47	289.771	1369.86	909.366	-0.459212	0.813151
circAP2A2	0	1	0	1	1	0	0	251.509	0	289.771	342.466	0	0.964599	1
circAPC	1	0	0	0	0	0	299.85	0	0	0	0	0	-1.80267	1
circAPLP2	0	0	0	1	0	1	0	0	0	289.771	0	303.122	2.76148	0.50011
circAQR	0	0	1	0	0	0	0	0	251.067	0	0	0	-1.79518	1
circARAP1	1	0	0	3	0	1	299.85	0	0	869.313	0	303.122	1.80633	0.44922
circARCN1_1	2	0	0	0	0	0	599.7	0	0	0	0	0	-2.64132	0.57471
circARCN1_2	0	3	0	1	1	1	0	754.527	0	289.771	342.466	303.122	0.213241	1
circARFGAP3_1	4	3	4	0	0	0	1199.4	754.527	1004.27	0	0	0	-4.81895	0.00197252
circARFGAP3_2	2	0	0	0	0	0	599.7	0	0	0	0	0	-2.64132	0.57471
circARFGAP3_3	1	0	1	0	2	0	299.85	0	251.067	0	684.932	0	0.211347	1
circARFGAP3_4	0	0	1	0	1	0	0	0	251.067	0	342.466	0	0.170268	1
circARFGEF1	0	0	1	0	0	0	0	0	251.067	0	0	0	-1.79518	1
circARFIP1	0	2	2	1	1	1	0	503.018	502.134	289.771	342.466	303.122	-0.172309	1
circARHGAP1	1	0	0	0	0	0	299.85	0	0	0	0	0	-1.80267	1
circARHGAP10_1	0	0	0	2	0	1	0	0	0	579.542	0	303.122	3.27024	0.256414
circARHGAP10_2	2	4	1	1	1	1	599.7	1006.04	251.067	289.771	342.466	303.122	-0.921915	0.344291
circARHGAP10_3	0	1	0	1	0	1	0	251.509	0	289.771	0	303.122	0.964525	1
circARHGAP10_4	2	1	0	0	2	2	599.7	251.509	0	0	684.932	606.244	0.573882	1
circARHGAP10_5	1	1	1	0	2	1	299.85	251.509	251.067	0	684.932	303.122	0.199234	1
circARHGAP12_1	2	1	2	0	1	1	599.7	251.509	502.134	0	342.466	303.122	-0.979905	0.453486
circARHGAP12_2	0	0	0	0	1	1	0	0	0	0	342.466	303.122	2.76169	0.500328
circARHGAP12_3	0	1	0	0	2	0	0	251.509	0	0	684.932	0	1.04128	1
circARHGAP12_4	0	0	0	1	0	0	0	0	0	289.771	0	0	1.9573	1
circARHGAP18_1	0	0	0	3	0	2	0	0	0	869.313	0	606.244	3.92929	0.0905086
circARHGAP18_2	0	0	1	1	0	1	0	0	251.067	289.771	0	303.122	0.964526	1
circARHGAP21	0	2	1	0	1	1	0	503.018	251.067	0	342.466	303.122	-0.312965	1
circARHGAP26	0	0	1	1	0	0	0	0	251.067	289.771	0	0	0.162537	1
circARHGAP29_1	6	1	0	0	0	0	1799.1	251.509	0	0	0	0	-4.3037	0.141707
circARHGAP29_2	2	2	0	0	1	0	599.7	503.018	0	0	342.466	0	-1.48757	0.392699
circARHGAP29_3	0	1	0	0	2	1	0	251.509	0	0	684.932	303.122	1.49036	0.641437
circARHGAP5_1	4	4	4	3	1	1	1199.4	1006.04	1004.27	869.313	342.466	303.122	-0.990448	0.210919
circARHGAP5_2	0	0	2	3	0	1	0	0	502.134	869.313	0	303.122	1.06403	0.767777
circARHGAP5_3	1	0	2	1	0	1	299.85	0	502.134	289.771	0	303.122	-0.313176	1
circARHGEF10	0	0	2	2	0	1	0	0	502.134	579.542	0	303.122	0.696312	1
circARHGEF28	0	0	0	0	1	1	0	0	0	0	342.466	303.122	2.76169	0.500328
circARHGEF38	0	0	2	0	0	0	0	0	502.134	0	0	0	-2.54964	0.554077
circARHGEF40	0	4	0	1	0	0	0	1006.04	0	289.771	0	0	-1.46877	0.630595
circARHGEF6	0	0	0	2	2	4	0	0	0	579.542	684.932	1212.49	4.59243	0.0078607
circARID1A_1	0	0	0	2	0	1	0	0	0	579.542	0	303.122	3.27024	0.256414
circARID1A_2	0	0	0	1	0	1	0	0	0	289.771	0	303.122	2.76148	0.50011
circARID1B	1	0	0	0	0	0	299.85	0	0	0	0	0	-1.80267	1
circARID4A	0	0	1	0	0	0	0	0	251.067	0	0	0	-1.79518	1
circARID4B_1	0	2	0	2	1	2	0	503.018	0	579.542	342.466	606.244	1.37697	0.453486
circARID4B_2	0	0	0	0	1	1	0	0	0	0	342.466	303.122	2.76169	0.500328
circARIH1_1	2	0	2	1	0	1	599.7	0	502.134	289.771	0	303.122	-0.684831	0.687706
circARIH1_2	3	0	0	2	0	1	899.55	0	0	579.542	0	303.122	0.0707912	1
circARIH2	0	0	4	1	0	1	0	0	1004.27	289.771	0	303.122	-0.665323	0.79857
circARL1	0	1	0	0	2	0	0	251.509	0	0	684.932	0	1.04128	1
circARL2BP	0	7	1	1	0	0	0	1760.56	251.067	289.771	0	0	-2.38784	0.307726
circARMH3	2	0	1	0	0	0	599.7	0	251.067	0	0	0	-3.08448	0.264853
circARSB	0	0	0	1	0	1	0	0	0	289.771	0	303.122	2.76148	0.50011
circASAH1	0	0	0	0	2	1	0	0	0	0	684.932	303.122	3.28545	0.269272
circASAP1	3	0	0	1	0	0	899.55	0	0	289.771	0	0	-1.25842	0.76664
circASAP2_1	0	0	0	2	0	1	0	0	0	579.542	0	303.122	3.27024	0.256414
circASAP2_2	0	0	2	0	0	0	0	0	502.134	0	0	0	-2.54964	0.554077
circASAP2_3	0	0	1	0	0	0	0	0	251.067	0	0	0	-1.79518	1
circASAP2_4	0	0	1	0	0	0	0	0	251.067	0	0	0	-1.79518	1
circASCC3	1	0	1	0	0	0	299.85	0	251.067	0	0	0	-2.57299	0.50033
circASH1L_1	0	3	0	3	2	4	0	754.527	0	869.313	684.932	1212.49	1.68111	0.092746
circASH1L_2	1	0	0	0	4	0	299.85	0	0	0	1369.86	0	1.88799	0.566062
circASH1L_3	0	1	0	1	0	1	0	251.509	0	289.771	0	303.122	0.964525	1
circATAD2	0	0	0	0	1	1	0	0	0	0	342.466	303.122	2.76169	0.500328
circATAD2B_1	0	2	0	1	2	1	0	503.018	0	289.771	684.932	303.122	1.07831	0.687706
circATAD2B_2	1	1	0	2	0	1	299.85	251.509	0	579.542	0	303.122	0.700778	1
circATAD2B_3	0	0	1	0	0	0	0	0	251.067	0	0	0	-1.79518	1
circATAD2B_4	0	0	1	0	0	0	0	0	251.067	0	0	0	-1.79518	1
circATE1_1	3	1	1	0	0	0	899.55	251.509	251.067	0	0	0	-3.74961	0.070151
circATE1_2	0	2	0	0	1	0	0	503.018	0	0	342.466	0	-0.558606	1
circATF6	0	0	0	1	0	1	0	0	0	289.771	0	303.122	2.76148	0.50011
circATF7IP	1	5	1	3	0	1	299.85	1257.55	251.067	869.313	0	303.122	-0.553999	0.814759
circATG10	1	0	0	0	0	0	299.85	0	0	0	0	0	-1.80267	1
circATG2B_1	0	3	1	0	0	0	0	754.527	251.067	0	0	0	-3.42108	0.174117
circATG2B_2	0	0	0	1	1	1	0	0	0	289.771	342.466	303.122	3.27379	0.250165
circATL3	3	1	6	3	3	5	899.55	251.509	1506.4	869.313	1027.4	1515.61	0.349002	0.664362
circATM	3	1	0	0	0	0	899.55	251.509	0	0	0	0	-3.49632	0.197441
circATP10D	0	0	0	0	1	0	0	0	0	0	342.466	0	1.96574	1
circATP11A_1	2	6	2	8	1	7	599.7	1509.05	502.134	2318.17	342.466	2121.86	0.85676	0.349411
circATP11A_2	1	1	1	1	0	1	299.85	251.509	251.067	289.771	0	303.122	-0.313177	1
circATP11B_1	1	0	0	1	0	1	299.85	0	0	289.771	0	303.122	0.964417	1
circATP11B_2	0	1	1	2	0	1	0	251.509	251.067	579.542	0	303.122	0.700887	1
circATP11C	0	0	0	1	3	3	0	0	0	289.771	1027.4	909.366	4.40842	0.0156973
circATP13A3_1	0	0	0	0	1	1	0	0	0	0	342.466	303.122	2.76169	0.500328
circATP13A3_2	2	0	0	0	0	0	599.7	0	0	0	0	0	-2.64132	0.57471
circATP13A4_1	0	0	0	0	1	1	0	0	0	0	342.466	303.122	2.76169	0.500328
circATP13A4_2	2	0	0	0	0	0	599.7	0	0	0	0	0	-2.64132	0.57471
circATP2C1	0	0	0	1	0	1	0	0	0	289.771	0	303.122	2.76148	0.50011
circATP6V0A2	0	4	3	2	1	3	0	1006.04	753.201	579.542	342.466	909.366	0.00636469	1
circATP6V1C1	2	0	1	0	1	0	599.7	0	251.067	0	342.466	0	-1.11975	0.642505
circATP8B1	1	0	1	0	0	0	299.85	0	251.067	0	0	0	-2.57299	0.50033
circATP8B4	0	0	0	1	0	0	0	0	0	289.771	0	0	1.9573	1
circATP9A	3	2	2	1	1	0	899.55	503.018	502.134	289.771	342.466	0	-1.43425	0.18012
circATPAF2	1	0	1	0	0	0	299.85	0	251.067	0	0	0	-2.57299	0.50033
circATRNL1	1	0	1	0	0	0	299.85	0	251.067	0	0	0	-2.57299	0.50033
circATRX_1	0	0	0	2	0	1	0	0	0	579.542	0	303.122	3.27024	0.256414
circATRX_2	0	1	1	0	1	1	0	251.509	251.067	0	342.466	303.122	0.188789	1
circATXN10	2	2	0	0	1	1	599.7	503.018	0	0	342.466	303.122	-0.684729	0.687706
circATXN2L	0	0	1	0	3	2	0	0	251.067	0	1027.4	606.244	2.19389	0.215929
circAVL9_1	0	0	0	1	0	1	0	0	0	289.771	0	303.122	2.76148	0.50011
circAVL9_2	1	1	0	0	0	0	299.85	251.509	0	0	0	0	-2.573	0.50033
circAVL9_3	4	0	3	4	1	4	1199.4	0	753.201	1159.08	342.466	1212.49	0.523614	0.842222
circAZIN1_1	0	0	0	0	3	1	0	0	0	0	1027.4	303.122	3.69662	0.201279
circAZIN1_2	1	2	0	1	1	2	299.85	503.018	0	289.771	342.466	606.244	0.576372	1
circBABAM2	0	0	0	0	1	0	0	0	0	0	342.466	0	1.96574	1
circBAG1	1	1	2	2	0	0	299.85	251.509	502.134	579.542	0	0	-0.684753	0.687706
circBAZ2B_1	0	0	0	1	1	2	0	0	0	289.771	342.466	606.244	3.65103	0.125165
circBAZ2B_2	3	2	0	0	1	0	899.55	503.018	0	0	342.466	0	-1.79555	0.305364
circBAZ2B_3	0	1	1	0	0	0	0	251.509	251.067	0	0	0	-2.57269	0.500296
circBAZ2B_4	1	0	1	0	2	1	299.85	0	251.067	0	684.932	303.122	0.702472	1
circBAZ2B_5	0	0	2	0	1	0	0	0	502.134	0	342.466	0	-0.557882	1
circBAZ2B_6	1	0	0	1	0	0	299.85	0	0	289.771	0	0	0.154837	1
circBAZ2B_7	0	1	2	1	1	1	0	251.509	502.134	289.771	342.466	303.122	0.199238	1
circBBS7	0	0	1	1	0	0	0	0	251.067	289.771	0	0	0.162537	1
circBBX	0	0	0	0	1	0	0	0	0	0	342.466	0	1.96574	1
circBCL11A	4	1	0	0	0	0	1199.4	251.509	0	0	0	0	-3.81876	0.168168
circBDP1_1	0	3	0	0	0	0	0	754.527	0	0	0	0	-3.03045	0.4202
circBDP1_2	0	1	0	0	2	1	0	251.509	0	0	684.932	303.122	1.49036	0.641437
circBEND7	0	0	0	0	1	0	0	0	0	0	342.466	0	1.96574	1
circBICRAL	0	0	1	1	0	0	0	0	251.067	289.771	0	0	0.162537	1
circBIRC6_1	1	0	0	0	0	0	299.85	0	0	0	0	0	-1.80267	1
circBIRC6_2	0	2	0	2	0	1	0	503.018	0	579.542	0	303.122	0.695826	1
circBIVM	1	0	2	1	0	0	299.85	0	502.134	289.771	0	0	-1.11589	0.628838
circBMP2K	0	0	0	0	1	0	0	0	0	0	342.466	0	1.96574	1
circBMPR1A	0	0	1	0	1	0	0	0	251.067	0	342.466	0	0.170268	1
circBMPR1B	1	2	0	1	1	2	299.85	503.018	0	289.771	342.466	606.244	0.576372	1
circBMPR2_1	3	5	0	0	3	3	899.55	1257.55	0	0	1027.4	909.366	-0.160256	1
circBMPR2_2	0	2	0	0	1	0	0	503.018	0	0	342.466	0	-0.558606	1
circBRAF_1	0	0	0	0	1	1	0	0	0	0	342.466	303.122	2.76169	0.500328
circBRAF_2	0	0	0	1	0	0	0	0	0	289.771	0	0	1.9573	1
circBRD4	4	4	1	6	1	4	1199.4	1006.04	251.067	1738.63	342.466	1212.49	0.468812	0.576835
circBRD7	0	5	3	4	3	4	0	1257.55	753.201	1159.08	1027.4	1212.49	0.657218	0.360296
circBRWD1_1	0	0	1	0	0	0	0	0	251.067	0	0	0	-1.79518	1
circBRWD1_2	0	1	0	0	1	0	0	251.509	0	0	342.466	0	0.170193	1
circBRWD1_3	0	0	2	0	1	1	0	0	502.134	0	342.466	303.122	0.202329	1
circBRWD1_4	0	0	0	1	0	0	0	0	0	289.771	0	0	1.9573	1
circBRWD1_5	0	0	1	0	0	0	0	0	251.067	0	0	0	-1.79518	1
circBRWD1_6	0	0	1	0	0	0	0	0	251.067	0	0	0	-1.79518	1
circBTAF1_1	1	3	0	0	0	0	299.85	754.527	0	0	0	0	-3.44303	0.166799
circBTAF1_2	0	0	0	0	1	0	0	0	0	0	342.466	0	1.96574	1
circBTBD7	3	1	1	0	1	0	899.55	251.509	251.067	0	342.466	0	-1.78704	0.238784
circC18orf25	1	4	0	1	0	0	299.85	1006.04	0	289.771	0	0	-1.78636	0.353926
circC2CD5	1	2	1	2	1	1	299.85	503.018	251.067	579.542	342.466	303.122	0.204796	1
circC2orf42	3	0	4	0	1	1	899.55	0	1004.27	0	342.466	303.122	-1.43809	0.276715
circCACUL1	3	2	1	1	1	1	899.55	503.018	251.067	289.771	342.466	303.122	-0.712724	0.508245
circCADM1	0	0	1	0	0	0	0	0	251.067	0	0	0	-1.79518	1
circCADPS2_1	1	0	1	0	0	0	299.85	0	251.067	0	0	0	-2.57299	0.50033
circCADPS2_2	1	0	0	0	0	0	299.85	0	0	0	0	0	-1.80267	1
circCANX_1	1	0	0	1	0	1	299.85	0	0	289.771	0	303.122	0.964417	1
circCANX_2	0	1	0	0	0	0	0	251.509	0	0	0	0	-1.79524	1
circCAPN2_1	0	0	2	0	4	2	0	0	502.134	0	1369.86	606.244	1.71324	0.427379
circCAPN2_2	0	1	1	1	0	0	0	251.509	251.067	289.771	0	0	-0.612851	1
circCAPZA1	0	0	0	2	0	1	0	0	0	579.542	0	303.122	3.27024	0.256414
circCARF	1	1	0	0	0	0	299.85	251.509	0	0	0	0	-2.573	0.50033
circCASC4_1	0	1	2	0	1	0	0	251.509	502.134	0	342.466	0	-1.1076	0.632472
circCASC4_2	0	0	1	0	0	0	0	0	251.067	0	0	0	-1.79518	1
circCAT	1	0	0	1	0	0	299.85	0	0	289.771	0	0	0.154837	1
circCBFA2T2_1	0	1	0	0	3	1	0	251.509	0	0	1027.4	303.122	1.91002	0.477913
circCBFA2T2_2	0	0	1	0	1	1	0	0	251.067	0	342.466	303.122	0.964631	1
circCBL	0	0	3	1	1	0	0	0	753.201	289.771	342.466	0	-0.271963	1
circCBX1	0	0	0	0	1	1	0	0	0	0	342.466	303.122	2.76169	0.500328
circCC2D2A	0	0	0	1	1	1	0	0	0	289.771	342.466	303.122	3.27379	0.250165
circCCAR1	0	1	1	1	3	2	0	251.509	251.067	289.771	1027.4	606.244	1.62452	0.289495
circCCAR1_1	0	0	4	0	0	0	0	0	1004.27	0	0	0	-3.39009	0.364287
circCCAR1_2	0	0	2	0	0	0	0	0	502.134	0	0	0	-2.54964	0.554077
circCCAR1_3	0	0	6	0	2	0	0	0	1506.4	0	684.932	0	-1.06228	0.789697
circCCAR1_4	3	3	4	7	2	3	899.55	754.527	1004.27	2028.4	684.932	909.366	0.470655	0.524482
circCCAR1_5	0	0	0	1	0	0	0	0	0	289.771	0	0	1.9573	1
circCCAR1_6	2	0	2	1	2	0	599.7	0	502.134	289.771	684.932	0	-0.172526	1
circCCDC149	10	5	3	9	4	8	2998.5	1257.55	753.201	2607.94	1369.86	2424.98	0.399517	0.632492
circCCDC30_1	4	1	2	0	0	0	1199.4	251.509	502.134	0	0	0	-4.2127	0.0240472
circCCDC30_2	0	0	1	0	0	0	0	0	251.067	0	0	0	-1.79518	1
circCCDC58	1	0	0	0	0	0	299.85	0	0	0	0	0	-1.80267	1
circCCDC66	1	0	0	0	0	0	299.85	0	0	0	0	0	-1.80267	1
circCCDC69	0	0	0	2	0	0	0	0	0	579.542	0	0	2.72928	0.562025
circCCT3_1	4	2	0	1	0	1	1199.4	503.018	0	289.771	0	303.122	-1.28204	0.405925
circCCT3_2	0	3	0	1	0	1	0	754.527	0	289.771	0	303.122	-0.302564	1
circCCT3_3	0	2	1	0	2	2	0	503.018	251.067	0	684.932	606.244	0.588221	1
circCCZ1	0	0	1	0	0	0	0	0	251.067	0	0	0	-1.79518	1
circCD46_1	0	0	0	1	2	3	0	0	0	289.771	684.932	909.366	4.19725	0.0313532
circCD46_2	0	1	0	0	0	0	0	251.509	0	0	0	0	-1.79524	1
circCDC123	0	0	2	0	1	1	0	0	502.134	0	342.466	303.122	0.202329	1
circCDC42BPA	0	3	0	0	2	2	0	754.527	0	0	684.932	606.244	0.646553	1
circCDCP1	0	0	0	1	0	1	0	0	0	289.771	0	303.122	2.76148	0.50011
circCDH1_1	0	0	0	0	2	1	0	0	0	0	684.932	303.122	3.28545	0.269272
circCDH1_2	0	0	0	0	1	1	0	0	0	0	342.466	303.122	2.76169	0.500328
circCDK12	0	2	0	0	0	0	0	503.018	0	0	0	0	-2.55037	0.554268
circCDK13_1	12	13	4	7	1	2	3598.2	3269.62	1004.27	2028.4	342.466	606.244	-1.33617	0.123327
circCDK13_2	1	0	0	1	0	0	299.85	0	0	289.771	0	0	0.154837	1
circCDK19	0	0	0	2	0	2	0	0	0	579.542	0	606.244	3.64687	0.131867
circCDK8	1	0	0	0	0	0	299.85	0	0	0	0	0	-1.80267	1
circCECR2	0	1	3	1	2	2	0	251.509	753.201	289.771	684.932	606.244	0.503774	1
circCENPC	0	0	1	0	0	0	0	0	251.067	0	0	0	-1.79518	1
circCEP128_1	2	0	1	0	0	0	599.7	0	251.067	0	0	0	-3.08448	0.264853
circCEP128_2	0	0	0	1	0	0	0	0	0	289.771	0	0	1.9573	1
circCEP162_1	0	2	0	0	0	0	0	503.018	0	0	0	0	-2.55037	0.554268
circCEP162_2	1	1	0	2	0	2	299.85	251.509	0	579.542	0	606.244	1.07802	0.687706
circCEP162_3	1	0	0	0	0	0	299.85	0	0	0	0	0	-1.80267	1
circCEP295	1	0	2	0	0	0	299.85	0	502.134	0	0	0	-3.07493	0.254232
circCEP350_1	3	2	1	5	1	3	899.55	503.018	251.067	1448.86	342.466	909.366	0.768298	0.609215
circCEP350_2	1	0	0	0	1	1	299.85	0	0	0	342.466	303.122	0.964456	1
circCEP63	6	3	7	1	2	2	1799.1	754.527	1757.47	289.771	684.932	606.244	-1.39364	0.0790371
circCFDP1_1	6	12	10	4	3	1	1799.1	3018.11	2510.67	1159.08	1027.4	303.122	-1.54273	0.00617778
circCFDP1_2	0	0	0	0	1	0	0	0	0	0	342.466	0	1.96574	1
circCHCHD6	0	0	1	0	0	0	0	0	251.067	0	0	0	-1.79518	1
circCHD2_1	0	0	1	1	2	2	0	0	251.067	289.771	684.932	606.244	2.15291	0.219059
circCHD2_2	0	0	1	0	2	2	0	0	251.067	0	684.932	606.244	1.86514	0.399682
circCHD2_3	1	2	6	3	0	1	299.85	503.018	1506.4	869.313	0	303.122	-0.890361	0.518097
circCHD2_4	0	0	0	2	0	0	0	0	0	579.542	0	0	2.72928	0.562025
circCHD2_5	2	1	2	3	0	3	599.7	251.509	502.134	869.313	0	909.366	0.453568	1
circCHD7_1	2	5	3	3	0	2	599.7	1257.55	753.201	869.313	0	606.244	-0.736705	0.424675
circCHD7_2	1	1	2	0	1	0	299.85	251.509	502.134	0	342.466	0	-1.48615	0.375275
circCHD7_3	0	1	1	4	0	1	0	251.509	251.067	1159.08	0	303.122	1.3585	0.556426
circCHD8	0	4	0	0	0	0	0	1006.04	0	0	0	0	-3.39187	0.364506
circCHD9	2	2	0	0	2	2	599.7	503.018	0	0	684.932	606.244	0.205607	1
circCHP1	4	1	0	0	0	0	1199.4	251.509	0	0	0	0	-3.81876	0.168168
circCHST15	0	0	1	0	0	0	0	0	251.067	0	0	0	-1.79518	1
circCIDEA	0	0	0	0	2	1	0	0	0	0	684.932	303.122	3.28545	0.269272
circCIT	0	0	1	0	0	0	0	0	251.067	0	0	0	-1.79518	1
circCLASP1	0	0	0	0	1	1	0	0	0	0	342.466	303.122	2.76169	0.500328
circCLCC1	0	0	1	1	0	1	0	0	251.067	289.771	0	303.122	0.964526	1
circCLEC16A	0	0	0	1	0	1	0	0	0	289.771	0	303.122	2.76148	0.50011
circCLIC4	1	0	2	3	1	2	299.85	0	502.134	869.313	342.466	606.244	1.12246	0.508245
circCLIP1_1	1	0	0	1	0	1	299.85	0	0	289.771	0	303.122	0.964417	1
circCLIP1_2	0	0	0	1	0	0	0	0	0	289.771	0	0	1.9573	1
circCLK1	1	0	0	0	0	0	299.85	0	0	0	0	0	-1.80267	1
circCLNS1A_1	0	0	0	2	0	2	0	0	0	579.542	0	606.244	3.64687	0.131867
circCLNS1A_2	0	0	0	1	1	1	0	0	0	289.771	342.466	303.122	3.27379	0.250165
circCLOCK	0	0	0	0	1	1	0	0	0	0	342.466	303.122	2.76169	0.500328
circCLPX	0	1	0	0	0	0	0	251.509	0	0	0	0	-1.79524	1
circCMAS	2	1	0	0	1	0	599.7	251.509	0	0	342.466	0	-1.11985	0.642454
circCNDP1	1	0	2	0	1	1	299.85	0	502.134	0	342.466	303.122	-0.313071	1
circCNN2	0	0	0	1	3	3	0	0	0	289.771	1027.4	909.366	4.40842	0.0156973
circCNOT11	2	1	0	1	0	1	599.7	251.509	0	289.771	0	303.122	-0.314513	1
circCNOT6L	5	2	6	2	1	1	1499.25	503.018	1506.4	579.542	342.466	303.122	-1.40111	0.0773261
circCOBLL1	1	0	0	1	0	1	299.85	0	0	289.771	0	303.122	0.964417	1
circCOG3_1	4	2	3	0	1	1	1199.4	503.018	753.201	0	342.466	303.122	-1.77923	0.0657488
circCOG3_2	0	1	2	1	0	0	0	251.509	502.134	289.771	0	0	-1.11298	0.630276
circCOG3_3	1	0	0	1	0	1	299.85	0	0	289.771	0	303.122	0.964417	1
circCOG3_4	0	1	0	0	0	0	0	251.509	0	0	0	0	-1.79524	1
circCOG3_5	0	0	1	0	1	1	0	0	251.067	0	342.466	303.122	0.964631	1
circCOG7	2	0	0	1	0	0	599.7	0	0	289.771	0	0	-0.70066	1
circCOP1_1	0	0	0	1	1	1	0	0	0	289.771	342.466	303.122	3.27379	0.250165
circCOP1_2	0	0	0	0	2	1	0	0	0	0	684.932	303.122	3.28545	0.269272
circCOPA_1	1	0	1	0	1	1	299.85	0	251.067	0	342.466	303.122	0.188681	1
circCOPA_2	1	1	0	1	0	1	299.85	251.509	0	289.771	0	303.122	0.188576	1
circCPEB2	3	0	1	2	1	1	899.55	0	251.067	579.542	342.466	303.122	0.196198	1
circCPEB3	0	0	0	0	1	1	0	0	0	0	342.466	303.122	2.76169	0.500328
circCPEB4_1	4	1	4	0	4	2	1199.4	251.509	1004.27	0	1369.86	606.244	-0.325023	1
circCPEB4_2	0	0	0	1	0	0	0	0	0	289.771	0	0	1.9573	1
circCPM_1	1	1	3	5	1	4	299.85	251.509	753.201	1448.86	342.466	1212.49	1.16037	0.182256
circCPM_2	1	0	0	1	1	1	299.85	0	0	289.771	342.466	303.122	1.47672	0.625165
circCPNE3	0	0	2	0	0	0	0	0	502.134	0	0	0	-2.54964	0.554077
circCRAMP1	3	0	0	0	0	0	899.55	0	0	0	0	0	-3.18695	0.448697
circCREB5	0	1	2	0	0	0	0	251.509	502.134	0	0	0	-3.07143	0.255717
circCREBBP_1	0	0	1	1	4	3	0	0	251.067	289.771	1369.86	909.366	2.80445	0.0286298
circCREBBP_2	1	0	1	0	1	1	299.85	0	251.067	0	342.466	303.122	0.188681	1
circCREBBP_3	1	0	0	0	0	0	299.85	0	0	0	0	0	-1.80267	1
circCREBBP_4	1	0	0	0	0	0	299.85	0	0	0	0	0	-1.80267	1
circCREBRF_1	3	0	1	0	0	0	899.55	0	251.067	0	0	0	-3.49609	0.197549
circCREBRF_2	4	0	0	0	0	0	1199.4	0	0	0	0	0	-3.57742	0.393379
circCREBRF_3	0	0	0	0	1	1	0	0	0	0	342.466	303.122	2.76169	0.500328
circCRIM1	0	1	1	1	0	1	0	251.509	251.067	289.771	0	303.122	0.188685	1
circCRYBG1	1	1	0	0	1	1	299.85	251.509	0	0	342.466	303.122	0.18868	1
circCSDE1	0	1	1	0	1	1	0	251.509	251.067	0	342.466	303.122	0.188789	1
circCSGALNACT2	2	0	0	0	0	0	599.7	0	0	0	0	0	-2.64132	0.57471
circCSN1S1_1	2	0	0	7	3	6	599.7	0	0	2028.4	1027.4	1818.73	2.98904	0.000745819
circCSN1S1_2	30	27	28	14	17	18	8995.5	6790.74	7029.88	4056.8	5821.92	5456.2	-0.567655	0.0398137
circCSN1S1_3	0	0	1	0	0	0	0	0	251.067	0	0	0	-1.79518	1
circCSN1S1_4	1	0	0	0	0	0	299.85	0	0	0	0	0	-1.80267	1
circCSN1S2_1	0	2	2	0	0	0	0	503.018	502.134	0	0	0	-3.44343	0.128731
circCSN1S2_2	0	0	1	1	0	1	0	0	251.067	289.771	0	303.122	0.964526	1
circCSN1S2_3	0	1	0	0	0	0	0	251.509	0	0	0	0	-1.79524	1
circCSNK1G1	1	1	0	0	0	0	299.85	251.509	0	0	0	0	-2.573	0.50033
circCSNK1G2	0	1	0	0	0	0	0	251.509	0	0	0	0	-1.79524	1
circCSNK1G3	0	0	0	1	1	0	0	0	0	289.771	342.466	0	2.76159	0.500299
circCSNK2A1	0	0	0	1	0	0	0	0	0	289.771	0	0	1.9573	1
circCSPP1	1	1	0	0	0	0	299.85	251.509	0	0	0	0	-2.573	0.50033
circCSPP1	0	1	2	2	1	2	0	251.509	502.134	579.542	342.466	606.244	0.875215	0.726803
circCTNNA1	0	0	1	1	0	0	0	0	251.067	289.771	0	0	0.162537	1
circCTSV	0	2	2	4	9	6	0	503.018	502.134	1159.08	3082.19	1818.73	2.37798	0.00122033
circCUL3	1	0	1	0	0	0	299.85	0	251.067	0	0	0	-2.57299	0.50033
circCUL5	0	0	1	0	0	0	0	0	251.067	0	0	0	-1.79518	1
circCYLD_1	0	1	0	3	0	0	0	251.509	0	869.313	0	0	1.44429	0.748288
circCYLD_2	0	0	1	0	0	0	0	0	251.067	0	0	0	-1.79518	1
circCYP51A1	0	0	0	0	2	0	0	0	0	0	684.932	0	2.82297	0.585803
circDARS2	0	0	1	0	0	0	0	0	251.067	0	0	0	-1.79518	1
circDCAF5	0	0	2	0	0	0	0	0	502.134	0	0	0	-2.54964	0.554077
circDCAF6	0	0	2	0	1	1	0	0	502.134	0	342.466	303.122	0.202329	1
circDCP2	0	0	0	2	0	1	0	0	0	579.542	0	303.122	3.27024	0.256414
circDCUN1D1_1	4	5	2	0	1	1	1199.4	1257.55	502.134	0	342.466	303.122	-2.05737	0.0388226
circDCUN1D1_2	3	1	3	1	0	0	899.55	251.509	753.201	289.771	0	0	-2.23586	0.0705532
circDCUN1D4_1	0	2	2	3	4	4	0	503.018	502.134	869.313	1369.86	1212.49	1.58945	0.0354499
circDCUN1D4_2	0	1	0	0	1	1	0	251.509	0	0	342.466	303.122	0.964629	1
circDDHD1	0	0	0	3	0	1	0	0	0	869.313	0	303.122	3.62424	0.174128
circDDHD1	0	0	1	0	0	0	0	0	251.067	0	0	0	-1.79518	1
circDDHD2	1	0	7	3	4	5	299.85	0	1757.47	869.313	1369.86	1515.61	0.811491	0.494802
circDDX1	0	0	0	0	1	1	0	0	0	0	342.466	303.122	2.76169	0.500328
circDDX10	1	1	0	1	0	1	299.85	251.509	0	289.771	0	303.122	0.188576	1
circDDX17_1	0	0	0	1	0	1	0	0	0	289.771	0	303.122	2.76148	0.50011
circDDX17_2	0	1	0	1	0	1	0	251.509	0	289.771	0	303.122	0.964525	1
circDDX27	0	0	1	1	2	1	0	0	251.067	289.771	684.932	303.122	1.85415	0.375275
circDDX50_1	1	1	0	0	0	0	299.85	251.509	0	0	0	0	-2.573	0.50033
circDDX50_2	1	0	0	0	1	1	299.85	0	0	0	342.466	303.122	0.964456	1
circDEK	0	0	0	1	0	1	0	0	0	289.771	0	303.122	2.76148	0.50011
circDENND1B_1	1	2	0	0	0	0	299.85	503.018	0	0	0	0	-3.07499	0.254278
circDENND1B_2	1	2	6	0	3	1	299.85	503.018	1506.4	0	1027.4	303.122	-0.8246	0.701359
circDENND1B_3	1	0	1	0	0	0	299.85	0	251.067	0	0	0	-2.57299	0.50033
circDENND4C_1	1	0	0	3	0	2	299.85	0	0	869.313	0	606.244	2.11783	0.277077
circDENND4C_2	1	1	5	0	2	1	299.85	251.509	1255.34	0	684.932	303.122	-0.882766	0.595252
circDENND4C_3	0	1	0	0	0	0	0	251.509	0	0	0	0	-1.79524	1
circDENND6A	0	0	0	1	0	1	0	0	0	289.771	0	303.122	2.76148	0.50011
circDGKH	0	0	1	0	0	0	0	0	251.067	0	0	0	-1.79518	1
circDHRSX	0	0	0	0	1	1	0	0	0	0	342.466	303.122	2.76169	0.500328
circDHX36	0	1	0	0	1	0	0	251.509	0	0	342.466	0	0.170193	1
circDHX57	1	0	0	0	0	0	299.85	0	0	0	0	0	-1.80267	1
circDICER1	1	0	0	0	0	0	299.85	0	0	0	0	0	-1.80267	1
circDIMT1	2	0	0	4	0	3	599.7	0	0	1159.08	0	909.366	1.72496	0.399318
circDIP2B	1	0	1	0	0	0	299.85	0	251.067	0	0	0	-2.57299	0.50033
circDIP2C	0	0	1	0	0	0	0	0	251.067	0	0	0	-1.79518	1
circDISC1	2	2	1	1	1	0	599.7	503.018	251.067	289.771	342.466	0	-0.979936	0.453486
circDLD	0	0	2	0	0	0	0	0	502.134	0	0	0	-2.54964	0.554077
circDLG1_1	2	0	0	0	0	0	599.7	0	0	0	0	0	-2.64132	0.57471
circDLG1_2	0	0	2	0	0	0	0	0	502.134	0	0	0	-2.54964	0.554077
circDLG1_3	2	0	1	1	0	0	599.7	0	251.067	289.771	0	0	-1.12751	0.638735
circDLG1_4	0	0	1	0	0	0	0	0	251.067	0	0	0	-1.79518	1
circDLG1_5	0	0	1	0	0	0	0	0	251.067	0	0	0	-1.79518	1
circDMXL1	1	0	2	0	1	0	299.85	0	502.134	0	342.466	0	-1.11281	0.630888
circDNAJA1	0	0	1	0	0	0	0	0	251.067	0	0	0	-1.79518	1
circDNAJB6	1	5	1	3	1	1	299.85	1257.55	251.067	869.313	342.466	303.122	-0.242846	1
circDNAJC1	0	1	1	0	1	1	0	251.509	251.067	0	342.466	303.122	0.188789	1
circDNAJC13	0	0	0	1	1	0	0	0	0	289.771	342.466	0	2.76159	0.500299
circDNAJC14	0	2	0	0	0	0	0	503.018	0	0	0	0	-2.55037	0.554268
circDNAJC16	1	1	0	1	2	0	299.85	251.509	0	289.771	684.932	0	0.7018	1
circDNAJC2	0	0	1	1	0	1	0	0	251.067	289.771	0	303.122	0.964526	1
circDOCK1_1	0	0	2	0	0	0	0	0	502.134	0	0	0	-2.54964	0.554077
circDOCK1_2	0	0	0	0	2	0	0	0	0	0	684.932	0	2.82297	0.585803
circDOCK1_3	1	3	0	0	2	2	299.85	754.527	0	0	684.932	606.244	0.225108	1
circDOCK1_4	0	2	0	0	2	1	0	503.018	0	0	684.932	303.122	0.749752	1
circDOCK1_5	1	0	0	0	0	0	299.85	0	0	0	0	0	-1.80267	1
circDOCK1_6	2	1	1	3	1	0	599.7	251.509	251.067	869.313	342.466	0	0.198274	1
circDOCK11	0	1	0	1	0	1	0	251.509	0	289.771	0	303.122	0.964525	1
circDOCK4	2	3	4	2	1	1	599.7	754.527	1004.27	579.542	342.466	303.122	-0.889603	0.388333
circDTNB_1	2	3	0	0	1	1	599.7	754.527	0	0	342.466	303.122	-0.980122	0.472478
circDTNB_2	2	3	2	0	2	2	599.7	754.527	502.134	0	684.932	606.244	-0.544566	0.754177
circDTNB_3	1	0	0	1	0	0	299.85	0	0	289.771	0	0	0.154837	1
circDYSF	0	0	0	0	1	0	0	0	0	0	342.466	0	1.96574	1
circECH1	3	1	2	3	2	2	899.55	251.509	502.134	869.313	684.932	606.244	0.421777	0.790849
circECPAS	8	7	2	0	3	2	2398.8	1760.56	502.134	0	1027.4	606.244	-1.48117	0.205403
circEDC3	1	0	4	1	0	1	299.85	0	1004.27	289.771	0	303.122	-0.982931	0.545209
circEED_1	0	0	0	0	1	1	0	0	0	0	342.466	303.122	2.76169	0.500328
circEED_2	2	0	0	0	0	0	599.7	0	0	0	0	0	-2.64132	0.57471
circEED_3	1	0	0	0	0	0	299.85	0	0	0	0	0	-1.80267	1
circEFL1_1	0	2	0	0	0	0	0	503.018	0	0	0	0	-2.55037	0.554268
circEFL1_2	0	0	1	0	0	0	0	0	251.067	0	0	0	-1.79518	1
circEGFR	1	0	1	3	0	0	299.85	0	251.067	869.313	0	0	0.63991	1
circEHBP1_1	2	1	1	0	0	0	599.7	251.509	251.067	0	0	0	-3.44631	0.125165
circEHBP1_2	3	1	0	1	0	0	899.55	251.509	0	289.771	0	0	-1.55046	0.475219
circEIF2AK1_1	0	0	0	1	0	1	0	0	0	289.771	0	303.122	2.76148	0.50011
circEIF2AK1_2	0	0	1	0	0	0	0	0	251.067	0	0	0	-1.79518	1
circEIF2AK4	0	1	0	0	3	2	0	251.509	0	0	1027.4	606.244	2.19358	0.215986
circEIF3A_1	1	0	0	0	0	0	299.85	0	0	0	0	0	-1.80267	1
circEIF3A_2	0	2	1	1	0	1	0	503.018	251.067	289.771	0	303.122	-0.313069	1
circEIF4E3	0	0	1	0	0	0	0	0	251.067	0	0	0	-1.79518	1
circELF2	6	7	5	2	5	6	1799.1	1760.56	1255.34	579.542	1712.33	1818.73	-0.239569	0.721019
circELL2_1	4	2	4	2	1	2	1199.4	503.018	1004.27	579.542	342.466	606.244	-0.736815	0.424675
circELL2_2	0	1	1	0	0	0	0	251.509	251.067	0	0	0	-2.57269	0.500296
circELP1	0	0	1	0	0	0	0	0	251.067	0	0	0	-1.79518	1
circEMC2	1	0	0	0	0	0	299.85	0	0	0	0	0	-1.80267	1
circEML4	2	0	0	1	0	0	599.7	0	0	289.771	0	0	-0.70066	1
circEML6	3	0	0	0	0	0	899.55	0	0	0	0	0	-3.18695	0.448697
circEMSY_1	1	0	0	2	3	3	299.85	0	0	579.542	1027.4	909.366	2.79544	0.0216199
circEMSY_2	0	0	0	1	0	1	0	0	0	289.771	0	303.122	2.76148	0.50011
circENOPH1	2	2	1	1	0	0	599.7	503.018	251.067	289.771	0	0	-1.78155	0.219059
circEPCAM	4	3	5	1	0	0	1199.4	754.527	1255.34	289.771	0	0	-2.98024	0.00641163
circEPN2_1	0	4	2	0	0	0	0	1006.04	502.134	0	0	0	-3.94882	0.119227
circEPN2_2	0	1	0	0	0	0	0	251.509	0	0	0	0	-1.79524	1
circEPS15_1	2	0	0	0	0	0	599.7	0	0	0	0	0	-2.64132	0.57471
circEPS15_2	0	0	1	1	0	0	0	0	251.067	289.771	0	0	0.162537	1
circERBB2	0	0	4	0	0	0	0	0	1004.27	0	0	0	-3.39009	0.364287
circERBIN_1	0	1	0	0	1	0	0	251.509	0	0	342.466	0	0.170193	1
circERBIN_2	0	1	1	1	0	0	0	251.509	251.067	289.771	0	0	-0.612851	1
circERC1	0	1	0	0	0	0	0	251.509	0	0	0	0	-1.79524	1
circERCC6L2	2	0	1	1	0	1	599.7	0	251.067	289.771	0	303.122	-0.314516	1
circERI3_1	0	3	2	1	0	1	0	754.527	502.134	289.771	0	303.122	-0.976068	0.695547
circERI3_2	2	2	0	1	1	0	599.7	503.018	0	289.771	342.466	0	-0.684759	0.687706
circERI3_3	0	0	0	1	0	0	0	0	0	289.771	0	0	1.9573	1
circERI3_4	0	2	0	1	0	0	0	503.018	0	289.771	0	0	-0.607845	1
circERLEC1_1	0	1	0	0	0	0	0	251.509	0	0	0	0	-1.79524	1
circERLEC1_2	0	1	0	0	0	0	0	251.509	0	0	0	0	-1.79524	1
circERO1B	2	0	0	0	0	0	599.7	0	0	0	0	0	-2.64132	0.57471
circERP44	0	0	1	0	0	0	0	0	251.067	0	0	0	-1.79518	1
circESCO1_1	0	0	1	4	2	1	0	0	251.067	1159.08	684.932	303.122	2.6113	0.0705532
circESCO1_2	2	1	5	1	2	2	599.7	251.509	1255.34	289.771	684.932	606.244	-0.428366	0.775304
circESCO1_3	1	0	0	0	0	0	299.85	0	0	0	0	0	-1.80267	1
circESR1	0	0	0	2	0	1	0	0	0	579.542	0	303.122	3.27024	0.256414
circETFA	3	6	2	1	3	2	899.55	1509.05	502.134	289.771	1027.4	606.244	-0.621522	0.62971
circEVI5_1	0	0	1	0	0	0	0	0	251.067	0	0	0	-1.79518	1
circEVI5_2	0	1	1	0	1	1	0	251.509	251.067	0	342.466	303.122	0.188789	1
circEVI5_3	0	0	2	1	0	1	0	0	502.134	289.771	0	303.122	0.189838	1
circEVL	0	1	0	1	0	0	0	251.509	0	289.771	0	0	0.162475	1
circEXOC1	0	0	0	0	2	2	0	0	0	0	684.932	606.244	3.66014	0.142512
circEXOC2	1	1	1	0	0	0	299.85	251.509	251.067	0	0	0	-3.07466	0.250165
circEXOC6B	1	0	0	0	0	0	299.85	0	0	0	0	0	-1.80267	1
circEZH2_1	0	1	2	0	0	0	0	251.509	502.134	0	0	0	-3.07143	0.255717
circEZH2_2	5	0	3	2	0	1	1499.25	0	753.201	579.542	0	303.122	-1.18587	0.428392
circEZH2_3	0	1	0	0	2	0	0	251.509	0	0	684.932	0	1.04128	1
circEZR	0	0	0	1	0	0	0	0	0	289.771	0	0	1.9573	1
circF8	0	0	0	0	1	1	0	0	0	0	342.466	303.122	2.76169	0.500328
circFADS3	0	0	2	1	0	0	0	0	502.134	289.771	0	0	-0.607095	1
circFAM114A2	1	2	0	2	0	1	299.85	503.018	0	579.542	0	303.122	0.197567	1
circFAM117B	0	0	0	1	0	0	0	0	0	289.771	0	0	1.9573	1
circFAM120A_1	0	0	3	0	1	1	0	0	753.201	0	342.466	303.122	-0.260387	1
circFAM120A_2	0	0	0	1	0	0	0	0	0	289.771	0	0	1.9573	1
circFAM120B	0	0	0	0	1	1	0	0	0	0	342.466	303.122	2.76169	0.500328
circFAM120C	0	0	1	1	0	0	0	0	251.067	289.771	0	0	0.162537	1
circFAM129A	0	0	0	0	1	0	0	0	0	0	342.466	0	1.96574	1
circFAM13B	0	0	0	0	1	1	0	0	0	0	342.466	303.122	2.76169	0.500328
circFAM160B1	0	0	0	1	0	1	0	0	0	289.771	0	303.122	2.76148	0.50011
circFAM208A_1	0	0	0	1	1	0	0	0	0	289.771	342.466	0	2.76159	0.500299
circFAM208A_2	0	1	1	0	0	0	0	251.509	251.067	0	0	0	-2.57269	0.500296
circFAM208B_1	3	1	0	0	0	0	899.55	251.509	0	0	0	0	-3.49632	0.197441
circFAM208B_2	0	0	1	0	1	0	0	0	251.067	0	342.466	0	0.170268	1
circFAM228B_3	0	0	1	0	0	0	0	0	251.067	0	0	0	-1.79518	1
circFAM241A	0	0	1	1	0	1	0	0	251.067	289.771	0	303.122	0.964526	1
circFANCL_1	1	0	0	4	0	3	299.85	0	0	1159.08	0	909.366	2.54899	0.1672
circFANCL_2	0	1	0	0	1	0	0	251.509	0	0	342.466	0	0.170193	1
circFARP1	0	0	0	0	2	2	0	0	0	0	684.932	606.244	3.66014	0.142512
circFBXO11	1	1	0	1	0	0	299.85	251.509	0	289.771	0	0	-0.613096	1
circFBXO28	2	0	1	1	1	1	599.7	0	251.067	289.771	342.466	303.122	0.199021	1
circFBXW4	0	2	0	2	3	4	0	503.018	0	579.542	1027.4	1212.49	2.18296	0.0388226
circFCHO2_1	0	3	1	0	0	0	0	754.527	251.067	0	0	0	-3.42108	0.174117
circFCHO2_2	0	0	1	1	0	1	0	0	251.067	289.771	0	303.122	0.964526	1
circFCHSD2_1	5	8	9	2	0	1	1499.25	2012.07	2259.6	579.542	0	303.122	-2.51924	0.000286752
circFCHSD2_2	0	0	1	1	1	2	0	0	251.067	289.771	342.466	606.244	1.85408	0.375275
circFCHSD2_3	0	1	1	0	0	0	0	251.509	251.067	0	0	0	-2.57269	0.500296
circFCHSD2_4	2	0	0	0	0	0	599.7	0	0	0	0	0	-2.64132	0.57471
circFCHSD2_5	2	8	9	6	6	9	599.7	2012.07	2259.6	1738.63	2054.79	2728.1	0.361982	0.431622
circFCHSD2_6	0	0	1	0	0	0	0	0	251.067	0	0	0	-1.79518	1
circFDFT1	0	0	0	0	1	1	0	0	0	0	342.466	303.122	2.76169	0.500328
circFES	1	0	0	0	0	0	299.85	0	0	0	0	0	-1.80267	1
circFGD4	0	0	1	0	0	0	0	0	251.067	0	0	0	-1.79518	1
circFGFR1	1	5	3	5	0	2	299.85	1257.55	753.201	1448.86	0	606.244	-0.143069	1
circFHOD3	0	0	2	2	1	2	0	0	502.134	579.542	342.466	606.244	1.37697	0.453486
circFIG4_1	2	2	0	0	0	0	599.7	503.018	0	0	0	0	-3.45031	0.133087
circFIG4_2	0	2	0	0	1	1	0	503.018	0	0	342.466	303.122	0.202161	1
circFIP1L1_1	0	0	1	2	0	1	0	0	251.067	579.542	0	303.122	1.47487	0.630264
circFIP1L1_2	0	1	0	0	0	0	0	251.509	0	0	0	0	-1.79524	1
circFKBP8	1	1	0	3	2	2	299.85	251.509	0	869.313	684.932	606.244	1.83538	0.18012
circFLT1	2	2	2	2	4	3	599.7	503.018	502.134	579.542	1369.86	909.366	0.769432	0.302563
circFLVCR1_1	1	2	0	1	0	1	299.85	503.018	0	289.771	0	303.122	-0.313178	1
circFLVCR1_2	0	0	1	0	0	0	0	0	251.067	0	0	0	-1.79518	1
circFNBP1L	0	0	0	0	1	1	0	0	0	0	342.466	303.122	2.76169	0.500328
circFNDC3B_1	1	5	0	1	0	1	299.85	1257.55	0	289.771	0	303.122	-1.22545	0.450686
circFNDC3B_2	0	0	2	1	1	1	0	0	502.134	289.771	342.466	303.122	0.700992	1
circFNIP1_1	0	0	2	0	1	1	0	0	502.134	0	342.466	303.122	0.202329	1
circFNIP1_2	1	0	0	0	0	0	299.85	0	0	0	0	0	-1.80267	1
circFNIP1_3	1	0	0	0	0	0	299.85	0	0	0	0	0	-1.80267	1
circFNIP2	0	0	0	0	1	1	0	0	0	0	342.466	303.122	2.76169	0.500328
circFOPNL	0	0	0	0	2	1	0	0	0	0	684.932	303.122	3.28545	0.269272
circFOXK2_1	8	4	5	6	4	3	2398.8	1006.04	1255.34	1738.63	1369.86	909.366	-0.159408	0.85601
circFOXK2_2	3	2	9	5	5	3	899.55	503.018	2259.6	1448.86	1712.33	909.366	0.1249	1
circFOXN2_3	2	0	0	0	0	0	599.7	0	0	0	0	0	-2.64132	0.57471
circFOXO3	2	1	2	3	1	2	599.7	251.509	502.134	869.313	342.466	606.244	0.455622	1
circFOXP1	0	0	0	2	0	2	0	0	0	579.542	0	606.244	3.64687	0.131867
circFTO_1	1	8	4	5	13	11	299.85	2012.07	1004.27	1448.86	4452.05	3334.34	1.40833	0.0566124
circFTO_2	0	0	2	6	0	4	0	0	502.134	1738.63	0	1212.49	2.30536	0.250533
circFTO_3	0	1	1	0	0	0	0	251.509	251.067	0	0	0	-2.57269	0.500296
circFTO_4	0	1	0	2	0	1	0	251.509	0	579.542	0	303.122	1.47483	0.630275
circGALNT11	1	2	2	1	0	1	299.85	503.018	502.134	289.771	0	303.122	-0.979902	0.453486
circGAN	0	0	1	0	0	0	0	0	251.067	0	0	0	-1.79518	1
circGANC	0	0	6	0	0	0	0	0	1506.4	0	0	0	-3.92092	0.353996
circGATAD2A	1	0	0	0	0	0	299.85	0	0	0	0	0	-1.80267	1
circGCA	2	0	1	2	1	1	599.7	0	251.067	579.542	342.466	303.122	0.576235	1
circGDI2_1	1	0	0	0	0	0	299.85	0	0	0	0	0	-1.80267	1
circGDI2_2	2	0	1	1	0	1	599.7	0	251.067	289.771	0	303.122	-0.314516	1
circGFPT1	0	2	9	2	1	1	0	503.018	2259.6	579.542	342.466	303.122	-1.12068	0.430163
circGGNBP2_1	4	2	2	0	0	0	1199.4	503.018	502.134	0	0	0	-4.37866	0.0078607
circGGNBP2_2	1	0	1	1	0	0	299.85	0	251.067	289.771	0	0	-0.613093	1
circGIGYF2_1	3	0	2	0	0	0	899.55	0	502.134	0	0	0	-3.77045	0.102926
circGIGYF2_2	2	1	0	0	0	0	599.7	251.509	0	0	0	0	-3.08454	0.264807
circGIGYF2_3	1	0	1	0	1	0	299.85	0	251.067	0	342.466	0	-0.612738	1
circGMDS	0	0	0	0	2	2	0	0	0	0	684.932	606.244	3.66014	0.142512
circGNB1_1	0	0	0	0	1	1	0	0	0	0	342.466	303.122	2.76169	0.500328
circGNB1_2	0	0	3	0	1	1	0	0	753.201	0	342.466	303.122	-0.260387	1
circGNL3	0	0	3	1	3	2	0	0	753.201	289.771	1027.4	606.244	1.15637	0.44149
circGNPTAB_1	0	0	0	0	1	1	0	0	0	0	342.466	303.122	2.76169	0.500328
circGNPTAB_2	1	0	2	0	1	1	299.85	0	502.134	0	342.466	303.122	-0.313071	1
circGOLGB1	0	0	0	1	2	1	0	0	0	289.771	684.932	303.122	3.65111	0.125165
circGOLPH3	0	1	1	1	7	5	0	251.509	251.067	289.771	2397.26	1515.61	2.74634	0.0364701
circGOLPH3L	0	0	1	0	2	1	0	0	251.067	0	684.932	303.122	1.49045	0.641416
circGON4L	2	6	5	1	4	3	599.7	1509.05	1255.34	289.771	1369.86	909.366	-0.459181	0.664362
circGPAM	2	0	0	0	0	0	599.7	0	0	0	0	0	-2.64132	0.57471
circGPBP1_1	2	3	1	1	0	0	599.7	754.527	251.067	289.771	0	0	-2.02646	0.125289
circGPBP1_2	0	0	1	0	0	0	0	0	251.067	0	0	0	-1.79518	1
circGPBP1_3	0	1	0	0	1	0	0	251.509	0	0	342.466	0	0.170193	1
circGPBP1_4	1	0	1	1	0	1	299.85	0	251.067	289.771	0	303.122	0.188577	1
circGPHN_1	0	0	0	1	1	1	0	0	0	289.771	342.466	303.122	3.27379	0.250165
circGPHN_2	3	2	0	1	1	0	899.55	503.018	0	289.771	342.466	0	-0.994676	0.496563
circGRAMD1C	0	0	1	0	2	1	0	0	251.067	0	684.932	303.122	1.49045	0.641416
circGRIPAP1	1	0	4	2	7	5	299.85	0	1004.27	579.542	2397.26	1515.61	1.67059	0.100189
circGSPT1_1	1	0	1	3	2	3	299.85	0	251.067	869.313	684.932	909.366	2.0195	0.109762
circGSPT1_2	0	0	0	1	0	0	0	0	0	289.771	0	0	1.9573	1
circGSPT1_3	2	0	1	1	1	1	599.7	0	251.067	289.771	342.466	303.122	0.199021	1
circGSTCD	3	1	5	0	0	0	899.55	251.509	1255.34	0	0	0	-4.54301	0.012681
circGTF2I_1	1	0	0	1	1	2	299.85	0	0	289.771	342.466	606.244	1.85397	0.375275
circGTF2I_2	0	0	0	3	0	0	0	0	0	869.313	0	0	3.21757	0.416195
circGTF2I_3	0	0	1	0	0	0	0	0	251.067	0	0	0	-1.79518	1
circGTF2I_4	1	0	0	0	0	0	299.85	0	0	0	0	0	-1.80267	1
circGUF1	0	0	0	1	0	0	0	0	0	289.771	0	0	1.9573	1
circGULP1_1	0	1	3	4	1	4	0	251.509	753.201	1159.08	342.466	1212.49	1.30906	0.16514
circGULP1_2	0	7	1	0	1	1	0	1760.56	251.067	0	342.466	303.122	-1.5379	0.428168
circGULP1_3	0	0	0	0	1	1	0	0	0	0	342.466	303.122	2.76169	0.500328
circGULP1_4	7	9	13	12	8	7	2098.95	2263.58	3263.87	3477.25	2739.73	2121.86	0.11937	0.894501
circGULP1_5	0	2	0	1	0	0	0	503.018	0	289.771	0	0	-0.607845	1
circGXYLT1_1	0	1	0	6	0	3	0	251.509	0	1738.63	0	909.366	2.92161	0.129622
circGXYLT1_2	0	0	0	2	0	0	0	0	0	579.542	0	0	2.72928	0.562025
circH2AFY	0	1	0	0	0	0	0	251.509	0	0	0	0	-1.79524	1
circHADH	1	0	1	2	0	1	299.85	0	251.067	579.542	0	303.122	0.700779	1
circHAT1	0	0	1	0	0	0	0	0	251.067	0	0	0	-1.79518	1
circHDGFL3_1	0	0	0	0	1	1	0	0	0	0	342.466	303.122	2.76169	0.500328
circHDGFL3_2	0	1	1	1	1	0	0	251.509	251.067	289.771	342.466	0	0.188759	1
circHDLBP	0	0	1	1	1	1	0	0	251.067	289.771	342.466	303.122	1.47683	0.625165
circHEATR3_1	2	1	0	0	0	0	599.7	251.509	0	0	0	0	-3.08454	0.264807
circHEATR3_2	3	0	0	0	0	0	899.55	0	0	0	0	0	-3.18695	0.448697
circHEATR3_3	0	0	1	0	0	0	0	0	251.067	0	0	0	-1.79518	1
circHECTD1	0	0	2	1	0	0	0	0	502.134	289.771	0	0	-0.607095	1
circHEG1	4	0	4	0	0	0	1199.4	0	1004.27	0	0	0	-4.41173	0.0498863
circHERC1	0	1	1	2	1	1	0	251.509	251.067	579.542	342.466	303.122	1.07821	0.687706
circHERC4	0	0	0	0	1	1	0	0	0	0	342.466	303.122	2.76169	0.500328
circHERPUD2	1	1	0	0	0	0	299.85	251.509	0	0	0	0	-2.573	0.50033
circHIBADH	0	1	1	6	1	2	0	251.509	251.067	1738.63	342.466	606.244	2.17139	0.114933
circHIF1A	0	0	0	1	0	1	0	0	0	289.771	0	303.122	2.76148	0.50011
circHIPK2	13	16	22	9	23	19	3898.05	4024.14	5523.47	2607.94	7876.71	5759.32	0.252671	0.632591
circHIPK3	0	5	2	1	3	3	0	1257.55	502.134	289.771	1027.4	909.366	0.25747	0.840664
circHMCN1	1	2	0	0	0	0	299.85	503.018	0	0	0	0	-3.07499	0.254278
circHMGXB3_1	0	0	0	1	0	0	0	0	0	289.771	0	0	1.9573	1
circHMGXB3_2	1	1	0	1	1	1	299.85	251.509	0	289.771	342.466	303.122	0.700882	1
circHSPD1	0	0	0	2	0	1	0	0	0	579.542	0	303.122	3.27024	0.256414
circHTT	2	0	0	1	1	2	599.7	0	0	289.771	342.466	606.244	1.07802	0.687706
circHUWE1_1	0	2	2	0	0	0	0	503.018	502.134	0	0	0	-3.44343	0.128731
circHUWE1_2	0	0	0	1	0	1	0	0	0	289.771	0	303.122	2.76148	0.50011
circHUWE1_3	1	1	0	0	0	0	299.85	251.509	0	0	0	0	-2.573	0.50033
circIARS_1	6	0	1	0	0	0	1799.1	0	251.067	0	0	0	-4.30347	0.141861
circIARS_2	0	0	1	0	0	0	0	0	251.067	0	0	0	-1.79518	1
circIDE	0	2	0	2	0	0	0	503.018	0	579.542	0	0	0.178084	1
circIDH2_1	2	1	4	0	1	0	599.7	251.509	1004.27	0	342.466	0	-2.23493	0.0729731
circIDH2_2	1	0	1	0	1	1	299.85	0	251.067	0	342.466	303.122	0.188681	1
circIFNGR2	0	1	1	0	1	1	0	251.509	251.067	0	342.466	303.122	0.188789	1
circIFT80	0	0	1	1	0	0	0	0	251.067	289.771	0	0	0.162537	1
circIFT88_1	0	0	0	1	0	1	0	0	0	289.771	0	303.122	2.76148	0.50011
circIFT88_2	0	0	0	0	1	1	0	0	0	0	342.466	303.122	2.76169	0.500328
circIGBP1	0	0	1	1	0	0	0	0	251.067	289.771	0	0	0.162537	1
circIGF1R	0	3	0	2	0	0	0	754.527	0	579.542	0	0	-0.317672	1
circIGSF9	1	0	0	2	1	1	299.85	0	0	579.542	342.466	303.122	1.85394	0.375275
circIKBKB	0	1	0	1	0	0	0	251.509	0	289.771	0	0	0.162475	1
circIL6ST_1	1	0	0	0	0	0	299.85	0	0	0	0	0	-1.80267	1
circIL6ST_2	3	0	0	2	0	0	899.55	0	0	579.542	0	0	-0.490412	1
circINO80	0	0	0	1	0	0	0	0	0	289.771	0	0	1.9573	1
circINPP4B	0	0	2	2	0	1	0	0	502.134	579.542	0	303.122	0.696312	1
circINPP5A	1	0	0	1	0	0	299.85	0	0	289.771	0	0	0.154837	1
circINSIG1	2	0	0	0	0	0	599.7	0	0	0	0	0	-2.64132	0.57471
circINTS10	0	0	1	0	2	1	0	0	251.067	0	684.932	303.122	1.49045	0.641416
circINVS	1	1	0	1	0	1	299.85	251.509	0	289.771	0	303.122	0.188576	1
circIPMK	2	1	0	0	0	0	599.7	251.509	0	0	0	0	-3.08454	0.264807
circIQGAP2_1	0	0	2	0	1	1	0	0	502.134	0	342.466	303.122	0.202329	1
circIQGAP2_2	1	0	0	0	0	0	299.85	0	0	0	0	0	-1.80267	1
circISM1_1	0	0	0	2	0	1	0	0	0	579.542	0	303.122	3.27024	0.256414
circISM1_2	0	0	1	1	0	0	0	0	251.067	289.771	0	0	0.162537	1
circITCH_1	1	2	5	1	2	1	299.85	503.018	1255.34	289.771	684.932	303.122	-0.724349	0.555896
circITCH_2	0	0	0	0	1	0	0	0	0	0	342.466	0	1.96574	1
circITCH_3	0	1	0	0	0	0	0	251.509	0	0	0	0	-1.79524	1
circITFG1	1	0	1	1	0	1	299.85	0	251.067	289.771	0	303.122	0.188577	1
circITGAV	2	0	1	0	0	0	599.7	0	251.067	0	0	0	-3.08448	0.264853
circITGB8	6	5	4	2	0	0	1799.1	1257.55	1004.27	579.542	0	0	-2.49135	0.0042432
circITPR2_1	0	0	0	1	0	1	0	0	0	289.771	0	303.122	2.76148	0.50011
circITPR2_2	0	0	2	1	0	0	0	0	502.134	289.771	0	0	-0.607095	1
circITPR2_3	1	0	1	0	2	0	299.85	0	251.067	0	684.932	0	0.211347	1
circITSN1_1	0	1	3	1	0	0	0	251.509	753.201	289.771	0	0	-1.47186	0.445257
circITSN1_2	5	0	1	0	1	1	1499.25	0	251.067	0	342.466	303.122	-1.2898	0.491537
circJMJD1C_1	0	1	0	0	0	0	0	251.509	0	0	0	0	-1.79524	1
circJMJD1C_2	0	0	0	1	0	0	0	0	0	289.771	0	0	1.9573	1
circJMY	1	0	0	0	0	0	299.85	0	0	0	0	0	-1.80267	1
circKANSL1	8	12	12	16	13	22	2398.8	3018.11	3012.8	4636.34	4452.05	6668.69	0.888089	0.0086169
circKANSL1L_1	1	0	0	2	1	2	299.85	0	0	579.542	342.466	606.244	2.1527	0.219059
circKANSL1L_2	2	2	3	2	6	5	599.7	503.018	753.201	579.542	2054.79	1515.61	1.07422	0.116115
circKANSL1L_3	6	4	5	10	5	7	1799.1	1006.04	1255.34	2897.71	1712.33	2121.86	0.760318	0.189536
circKANSL1L_4	3	3	3	3	1	3	899.55	754.527	753.201	869.313	342.466	909.366	-0.132499	1
circKANSL3	0	0	0	0	1	1	0	0	0	0	342.466	303.122	2.76169	0.500328
circKARS	3	0	0	0	0	0	899.55	0	0	0	0	0	-3.18695	0.448697
circKATNBL1_1	2	0	3	0	0	0	599.7	0	753.201	0	0	0	-3.74861	0.0879236
circKATNBL1_2	2	0	0	0	0	0	599.7	0	0	0	0	0	-2.64132	0.57471
circKATNBL1_3	0	0	1	0	0	0	0	0	251.067	0	0	0	-1.79518	1
circKCMF1	0	0	0	1	1	2	0	0	0	289.771	342.466	606.244	3.65103	0.125165
circKCTD9_1	1	0	1	1	5	3	299.85	0	251.067	289.771	1712.33	909.366	2.19787	0.0722123
circKCTD9_2	0	1	2	0	0	0	0	251.509	502.134	0	0	0	-3.07143	0.255717
circKCTD9_3	0	1	0	0	2	1	0	251.509	0	0	684.932	303.122	1.49036	0.641437
circKCTD9_4	2	0	1	1	1	1	599.7	0	251.067	289.771	342.466	303.122	0.199021	1
circKDM1A	0	1	2	0	0	0	0	251.509	502.134	0	0	0	-3.07143	0.255717
circKDM2A	0	0	0	0	1	1	0	0	0	0	342.466	303.122	2.76169	0.500328
circKDM4B	2	0	0	0	0	0	599.7	0	0	0	0	0	-2.64132	0.57471
circKDM4C	1	0	0	0	0	0	299.85	0	0	0	0	0	-1.80267	1
circKDM5A_1	4	0	0	0	0	0	1199.4	0	0	0	0	0	-3.57742	0.393379
circKDM5A_2	2	1	0	5	0	1	599.7	251.509	0	1448.86	0	303.122	1.02917	0.670989
circKDM5A_3	0	1	0	1	0	0	0	251.509	0	289.771	0	0	0.162475	1
circKDM5B_4	0	1	1	1	2	2	0	251.509	251.067	289.771	684.932	606.244	1.37707	0.453486
circKDM5B_5	0	0	1	0	0	0	0	0	251.067	0	0	0	-1.79518	1
circKDM7A_1	0	1	0	1	1	2	0	251.509	0	289.771	342.466	606.244	1.85408	0.375275
circKDM7A_2	0	0	1	0	1	1	0	0	251.067	0	342.466	303.122	0.964631	1
circKIAA1217_1	0	2	0	3	1	2	0	503.018	0	869.313	342.466	606.244	1.62432	0.289495
circKIAA1217_2	0	0	0	2	0	0	0	0	0	579.542	0	0	2.72928	0.562025
circKIAA1217_3	0	1	0	0	0	0	0	251.509	0	0	0	0	-1.79524	1
circKIAA2026_1	2	6	5	3	3	5	599.7	1509.05	1255.34	869.313	1027.4	1515.61	-0.016321	1
circKIAA2026_2	0	1	0	0	0	0	0	251.509	0	0	0	0	-1.79524	1
circKIF13A	0	0	1	0	0	0	0	0	251.067	0	0	0	-1.79518	1
circKIF21A	1	1	0	1	3	3	299.85	251.509	0	289.771	1027.4	909.366	1.83552	0.109762
circKIF5B	0	2	0	0	0	0	0	503.018	0	0	0	0	-2.55037	0.554268
circKIF5B	1	0	0	0	0	0	299.85	0	0	0	0	0	-1.80267	1
circKIN	0	0	0	0	1	0	0	0	0	0	342.466	0	1.96574	1
circKLHL24_1	2	1	2	0	0	0	599.7	251.509	502.134	0	0	0	-3.74149	0.0626375
circKLHL24_2	0	2	1	1	2	3	0	503.018	251.067	289.771	684.932	909.366	1.1227	0.508245
circKMT2A	0	1	0	0	0	0	0	251.509	0	0	0	0	-1.79524	1
circKMT2C_1	0	0	0	5	0	2	0	0	0	1448.86	0	606.244	4.36055	0.0707064
circKMT2C_2	0	2	0	1	4	3	0	503.018	0	289.771	1369.86	909.366	2.04139	0.105161
circKMT2C_3	3	2	0	1	1	1	899.55	503.018	0	289.771	342.466	303.122	-0.468468	0.727809
circKMT2E_1	0	1	2	0	2	2	0	251.509	502.134	0	684.932	606.244	0.588187	1
circKMT2E_2	1	0	0	0	0	0	299.85	0	0	0	0	0	-1.80267	1
circKMT2E_3	0	0	1	0	0	0	0	0	251.067	0	0	0	-1.79518	1
circKMT2E_4	0	0	1	0	0	0	0	0	251.067	0	0	0	-1.79518	1
circKMT2E_5	2	1	1	3	2	0	599.7	251.509	251.067	869.313	684.932	0	0.501505	1
circKMT5B	1	1	2	0	1	0	299.85	251.509	502.134	0	342.466	0	-1.48615	0.375275
circKPNA4	0	2	0	0	2	2	0	503.018	0	0	684.932	606.244	1.11965	0.749599
circKRIT1_1	0	0	1	1	2	1	0	0	251.067	289.771	684.932	303.122	1.85415	0.375275
circKRIT1_2	1	2	5	1	4	2	299.85	503.018	1255.34	289.771	1369.86	606.244	0.0553265	1
circKRT23	0	0	0	1	0	1	0	0	0	289.771	0	303.122	2.76148	0.50011
circKTN1_1	3	2	0	1	0	1	899.55	503.018	0	289.771	0	303.122	-1.00216	0.493699
circKTN1_2	2	0	0	0	0	0	599.7	0	0	0	0	0	-2.64132	0.57471
circL3MBTL3	0	0	0	2	0	2	0	0	0	579.542	0	606.244	3.64687	0.131867
circLAPTM4B_1	0	1	1	0	0	0	0	251.509	251.067	0	0	0	-2.57269	0.500296
circLAPTM4B_2	0	0	2	0	0	0	0	0	502.134	0	0	0	-2.54964	0.554077
circLARP4	0	0	0	1	0	0	0	0	0	289.771	0	0	1.9573	1
circLARP4B_1	0	3	0	0	0	0	0	754.527	0	0	0	0	-3.03045	0.4202
circLARP4B_2	3	3	4	4	0	3	899.55	754.527	1004.27	1159.08	0	909.366	-0.278362	0.803964
circLASP1	0	0	0	1	0	0	0	0	0	289.771	0	0	1.9573	1
circLATS1	1	1	0	3	0	3	299.85	251.509	0	869.313	0	909.366	1.60168	0.345972
circLDLR	2	3	2	2	0	0	599.7	754.527	502.134	579.542	0	0	-1.43425	0.18012
circLDLRAD3	0	0	0	1	0	1	0	0	0	289.771	0	303.122	2.76148	0.50011
circLIFR_1	1	2	1	1	0	0	299.85	503.018	251.067	289.771	0	0	-1.48626	0.375275
circLIFR_2	2	3	1	2	2	2	599.7	754.527	251.067	579.542	684.932	606.244	0.210813	1
circLIN54_1	0	0	0	0	2	2	0	0	0	0	684.932	606.244	3.66014	0.142512
circLIN54_2	0	0	2	1	0	0	0	0	502.134	289.771	0	0	-0.607095	1
circLMBR1_1	0	0	3	1	0	0	0	0	753.201	289.771	0	0	-1.10003	0.750389
circLMBR1_2	0	0	1	1	1	0	0	0	251.067	289.771	342.466	0	0.964601	1
circLMBR1L	0	2	1	0	0	0	0	503.018	251.067	0	0	0	-3.07143	0.255788
circLMBRD2	0	0	2	0	0	0	0	0	502.134	0	0	0	-2.54964	0.554077
circLMNTD1_1	0	2	2	1	0	1	0	503.018	502.134	289.771	0	303.122	-0.684615	0.687706
circLMNTD1_2	2	3	0	0	3	2	599.7	754.527	0	0	1027.4	606.244	0.229621	1
circLMNTD1_3	0	0	2	1	0	0	0	0	502.134	289.771	0	0	-0.607095	1
circLNX1	1	1	1	3	0	1	299.85	251.509	251.067	869.313	0	303.122	0.572111	1
circLOC110259338	0	0	0	1	1	1	0	0	0	289.771	342.466	303.122	3.27379	0.250165
circLONP2_1	0	0	0	0	4	1	0	0	0	0	1369.86	303.122	4.0167	0.123066
circLONP2_2	0	0	0	0	1	1	0	0	0	0	342.466	303.122	2.76169	0.500328
circLPGAT1	1	0	0	1	1	2	299.85	0	0	289.771	342.466	606.244	1.85397	0.375275
circLPP	2	0	1	0	0	0	599.7	0	251.067	0	0	0	-3.08448	0.264853
circLPXN	1	2	0	1	2	3	299.85	503.018	0	289.771	684.932	909.366	1.12259	0.508245
circLRBA	1	0	3	0	1	0	299.85	0	753.201	0	342.466	0	-1.46642	0.444129
circLRCH1_1	0	0	0	0	1	1	0	0	0	0	342.466	303.122	2.76169	0.500328
circLRCH1_2	1	3	5	2	5	4	299.85	754.527	1255.34	579.542	1712.33	1212.49	0.496365	0.507582
circLRCH3_1	0	1	0	0	0	0	0	251.509	0	0	0	0	-1.79524	1
circLRCH3_2	0	1	2	1	0	1	0	251.509	502.134	289.771	0	303.122	-0.313068	1
circLRP6_1	0	0	1	1	0	1	0	0	251.067	289.771	0	303.122	0.964526	1
circLRP6_2	0	4	0	1	1	2	0	1006.04	0	289.771	342.466	606.244	0.236029	1
circLRP6_3	0	2	0	0	1	1	0	503.018	0	0	342.466	303.122	0.202161	1
circLRRC1	0	0	1	0	0	0	0	0	251.067	0	0	0	-1.79518	1
circLRRIQ3	0	2	1	0	1	0	0	503.018	251.067	0	342.466	0	-1.10757	0.632561
circLSM14A_1	5	11	14	8	4	4	1499.25	2766.6	3514.94	2318.17	1369.86	1212.49	-0.667612	0.206254
circLSM14A_2	0	0	2	0	0	0	0	0	502.134	0	0	0	-2.54964	0.554077
circLSM14A_3	1	1	2	0	2	0	299.85	251.509	502.134	0	684.932	0	-0.679496	0.694894
circLSM14A_4	0	0	3	1	0	0	0	0	753.201	289.771	0	0	-1.10003	0.750389
circLTF	0	0	1	0	0	0	0	0	251.067	0	0	0	-1.79518	1
circLYRM7	0	3	2	0	0	0	0	754.527	502.134	0	0	0	-3.72221	0.0854588
circLYST	2	4	2	1	0	1	599.7	1006.04	502.134	289.771	0	303.122	-1.61696	0.18012
circMACC1	0	0	0	1	0	0	0	0	0	289.771	0	0	1.9573	1
circMACF1	3	2	1	1	0	0	899.55	503.018	251.067	289.771	0	0	-2.02657	0.125289
circMADD	1	2	0	1	0	1	299.85	503.018	0	289.771	0	303.122	-0.313178	1
circMAGI1_1	0	0	0	1	1	1	0	0	0	289.771	342.466	303.122	3.27379	0.250165
circMAGT1_2	0	0	0	1	0	1	0	0	0	289.771	0	303.122	2.76148	0.50011
circMALT1_3	0	0	1	0	0	0	0	0	251.067	0	0	0	-1.79518	1
circMAP2K1_1	1	1	3	0	1	0	299.85	251.509	753.201	0	342.466	0	-1.78133	0.219059
circMAP3K1_2	0	0	1	0	2	1	0	0	251.067	0	684.932	303.122	1.49045	0.641416
circMAP3K2_1	0	3	4	0	0	0	0	754.527	1004.27	0	0	0	-4.15593	0.0750949
circMAP3K2_2	0	3	0	2	0	1	0	754.527	0	579.542	0	303.122	0.199188	1
circMAP3K3	0	0	2	0	2	0	0	0	502.134	0	684.932	0	0.308237	1
circMAPK6_1	0	1	0	0	0	0	0	251.509	0	0	0	0	-1.79524	1
circMAPK6_2	1	1	0	1	0	0	299.85	251.509	0	289.771	0	0	-0.613096	1
circMAPKAP1_1	0	0	0	0	1	1	0	0	0	0	342.466	303.122	2.76169	0.500328
circMAPKAP1_2	0	6	0	0	2	2	0	1509.05	0	0	684.932	606.244	-0.23497	1
circMARCH7_1	1	0	1	0	0	0	299.85	0	251.067	0	0	0	-2.57299	0.50033
circMARCH7_2	1	3	1	1	1	1	299.85	754.527	251.067	289.771	342.466	303.122	-0.467597	0.726803
circMARK1	1	0	0	0	0	0	299.85	0	0	0	0	0	-1.80267	1
circMAST3	2	2	2	0	1	1	599.7	503.018	502.134	0	342.466	303.122	-1.22482	0.289495
circMAST4	1	1	0	1	0	0	299.85	251.509	0	289.771	0	0	-0.613096	1
circMATR3_1	3	3	1	0	0	0	899.55	754.527	251.067	0	0	0	-4.19581	0.0156973
circMATR3_2	2	6	0	1	3	4	599.7	1509.05	0	289.771	1027.4	1212.49	0.235035	0.871241
circMATR3_3	0	2	0	0	1	1	0	503.018	0	0	342.466	303.122	0.202161	1
circMBD5	0	1	1	3	0	0	0	251.509	251.067	869.313	0	0	0.684362	1
circMCCC1_1	1	2	0	0	0	0	299.85	503.018	0	0	0	0	-3.07499	0.254278
circMCCC1_2	0	0	1	1	0	0	0	0	251.067	289.771	0	0	0.162537	1
circMCMBP	0	0	0	4	2	3	0	0	0	1159.08	684.932	909.366	4.75563	0.00393726
circMDFIC	0	0	1	1	1	0	0	0	251.067	289.771	342.466	0	0.964601	1
circMED14	0	0	0	1	0	0	0	0	0	289.771	0	0	1.9573	1
circMED17	1	0	1	0	0	0	299.85	0	251.067	0	0	0	-2.57299	0.50033
circMEF2A	0	0	1	3	0	1	0	0	251.067	869.313	0	303.122	1.83646	0.443739
circMEMO1	3	0	0	3	2	2	899.55	0	0	869.313	684.932	606.244	1.32889	0.354042
circMETTL9	3	2	2	4	3	5	899.55	503.018	502.134	1159.08	1027.4	1515.61	0.961481	0.167956
circMFAP1_1	0	0	0	0	2	2	0	0	0	0	684.932	606.244	3.66014	0.142512
circMFAP1_2	0	1	1	0	1	0	0	251.509	251.067	0	342.466	0	-0.612057	1
circMFSD14A	0	0	1	0	0	0	0	0	251.067	0	0	0	-1.79518	1
circMFSD6	1	2	0	0	0	0	299.85	503.018	0	0	0	0	-3.07499	0.254278
circMGA_1	1	6	2	3	1	2	299.85	1509.05	502.134	869.313	342.466	606.244	-0.338525	0.811379
circMGA_2	5	1	3	2	2	4	1499.25	251.509	753.201	579.542	684.932	1212.49	0.0442698	1
circMGAM2	0	0	4	0	0	0	0	0	1004.27	0	0	0	-3.39009	0.364287
circMIA2	1	0	0	0	0	0	299.85	0	0	0	0	0	-1.80267	1
circMIB1_1	0	1	0	2	1	1	0	251.509	0	579.542	342.466	303.122	1.85405	0.375275
circMIB1_2	0	0	1	0	0	0	0	0	251.067	0	0	0	-1.79518	1
circMICU2	3	5	2	1	1	1	899.55	1257.55	502.134	289.771	342.466	303.122	-1.41269	0.146528
circMINDY3_1	0	0	0	0	3	2	0	0	0	0	1027.4	606.244	3.98262	0.113764
circMINDY3_2	2	4	4	1	1	2	599.7	1006.04	1004.27	289.771	342.466	606.244	-1.03533	0.267536
circMINDY3_3	1	10	5	1	5	1	299.85	2515.09	1255.34	289.771	1712.33	303.122	-0.843477	0.545405
circMIPOL1	0	0	0	0	1	1	0	0	0	0	342.466	303.122	2.76169	0.500328
circMIS18BP1_1	0	0	0	3	1	3	0	0	0	869.313	342.466	909.366	4.40821	0.0156973
circMIS18BP1_2	0	0	0	0	2	2	0	0	0	0	684.932	606.244	3.66014	0.142512
circMKLN1_1	0	2	6	0	0	0	0	503.018	1506.4	0	0	0	-4.32371	0.0920389
circMKLN1_2	3	0	1	1	1	1	899.55	0	251.067	289.771	342.466	303.122	-0.181634	1
circMLLT10_1	1	4	1	2	0	0	299.85	1006.04	251.067	579.542	0	0	-1.22916	0.528948
circMLLT10_2	0	0	0	0	1	1	0	0	0	0	342.466	303.122	2.76169	0.500328
circMLLT10_3	3	0	1	3	1	2	899.55	0	251.067	869.313	342.466	606.244	0.746037	0.758665
circMLLT3	1	2	2	1	3	4	299.85	503.018	502.134	289.771	1027.4	1212.49	0.851155	0.267536
circMNAT1_1	0	1	2	0	0	0	0	251.509	502.134	0	0	0	-3.07143	0.255717
circMNAT1_2	1	0	0	1	2	1	299.85	0	0	289.771	684.932	303.122	1.85404	0.375275
circMOBKL3	0	0	2	0	0	0	0	0	502.134	0	0	0	-2.54964	0.554077
circMORC3_1	1	0	2	0	0	0	299.85	0	502.134	0	0	0	-3.07493	0.254232
circMORC3_2	1	0	0	1	0	1	299.85	0	0	289.771	0	303.122	0.964417	1
circMPHOSPH9	0	0	1	0	0	0	0	0	251.067	0	0	0	-1.79518	1
circMPP6	3	0	3	0	1	1	899.55	0	753.201	0	342.466	303.122	-1.23269	0.35077
circMPZL1	0	1	0	0	0	0	0	251.509	0	0	0	0	-1.79524	1
circMRPL42	2	4	1	1	0	0	599.7	1006.04	251.067	289.771	0	0	-2.23598	0.0720402
circMRPS35	0	0	2	0	0	0	0	0	502.134	0	0	0	-2.54964	0.554077
circMRPS5	1	0	1	6	1	4	299.85	0	251.067	1738.63	342.466	1212.49	2.44572	0.038742
circMRS2	0	0	1	0	0	0	0	0	251.067	0	0	0	-1.79518	1
circMSH3_1	0	0	0	0	1	1	0	0	0	0	342.466	303.122	2.76169	0.500328
circMSH3_2	2	0	3	3	2	2	599.7	0	753.201	869.313	684.932	606.244	0.666798	0.774711
circMSH3_3	0	1	0	0	0	0	0	251.509	0	0	0	0	-1.79524	1
circMSRB3	2	0	0	0	0	0	599.7	0	0	0	0	0	-2.64132	0.57471
circMTERF3	2	1	1	2	3	4	599.7	251.509	251.067	579.542	1027.4	1212.49	1.30945	0.180237
circMTFR1	2	2	2	1	1	0	599.7	503.018	502.134	289.771	342.466	0	-1.22485	0.289495
circMTHFSD_1	1	2	0	3	1	3	299.85	503.018	0	869.313	342.466	909.366	1.33355	0.344291
circMTHFSD_2	0	0	1	1	1	1	0	0	251.067	289.771	342.466	303.122	1.47683	0.625165
circMTHFSD_3	3	0	0	0	3	2	899.55	0	0	0	1027.4	606.244	0.825202	0.734687
circMTM1_1	3	2	4	2	0	0	899.55	503.018	1004.27	579.542	0	0	-1.77926	0.109762
circMTM1_2	0	0	0	1	1	1	0	0	0	289.771	342.466	303.122	3.27379	0.250165
circMTMR14	0	1	0	2	1	2	0	251.509	0	579.542	342.466	606.244	2.15281	0.219059
circMTMR3	0	2	3	6	1	5	0	503.018	753.201	1738.63	342.466	1515.61	1.41307	0.111521
circMTMR6_1	6	0	2	0	0	0	1799.1	0	502.134	0	0	0	-4.46388	0.0870762
circMTMR6_2	1	0	2	0	0	0	299.85	0	502.134	0	0	0	-3.07493	0.254232
circMTOR	0	1	0	0	0	0	0	251.509	0	0	0	0	-1.79524	1
circMTR_1	0	2	0	2	0	0	0	503.018	0	579.542	0	0	0.178084	1
circMTR_2	0	0	1	0	0	0	0	0	251.067	0	0	0	-1.79518	1
circMTUS1	0	5	2	0	0	0	0	1257.55	502.134	0	0	0	-4.148	0.102709
circMUC4_1	7	2	9	3	1	3	2098.95	503.018	2259.6	869.313	342.466	909.366	-1.12035	0.208067
circMUC4_2	2	0	1	0	1	1	599.7	0	251.067	0	342.466	303.122	-0.313927	1
circMUT	1	0	0	0	0	0	299.85	0	0	0	0	0	-1.80267	1
circMYH11	0	2	0	1	0	1	0	503.018	0	289.771	0	303.122	0.189613	1
circMYO1B	0	1	1	0	0	0	0	251.509	251.067	0	0	0	-2.57269	0.500296
circMYO5C	6	4	3	2	3	5	1799.1	1006.04	753.201	579.542	1027.4	1515.61	-0.149823	1
circMYO9A_1	2	0	0	1	0	1	599.7	0	0	289.771	0	303.122	0.149073	1
circMYO9A_2	0	0	1	0	0	0	0	0	251.067	0	0	0	-1.79518	1
circMYO9A_3	2	0	0	2	0	1	599.7	0	0	579.542	0	303.122	0.631437	1
circMYO9B_1	0	2	0	0	0	0	0	503.018	0	0	0	0	-2.55037	0.554268
circMYO9B_2	1	1	1	0	1	0	299.85	251.509	251.067	0	342.466	0	-1.11461	0.625165
circMYOF_1	0	0	0	2	0	1	0	0	0	579.542	0	303.122	3.27024	0.256414
circMYOF_2	3	0	0	0	0	0	899.55	0	0	0	0	0	-3.18695	0.448697
circMYOF_3	1	0	1	3	0	0	299.85	0	251.067	869.313	0	0	0.63991	1
circMYOF_4	0	0	1	0	0	0	0	0	251.067	0	0	0	-1.79518	1
circN4BP1	0	0	1	0	0	0	0	0	251.067	0	0	0	-1.79518	1
circN4BP2L2	2	1	1	0	1	0	599.7	251.509	251.067	0	342.466	0	-1.48626	0.375275
circNAA15_1	0	0	0	3	0	1	0	0	0	869.313	0	303.122	3.62424	0.174128
circNAA15_2	1	1	1	2	0	1	299.85	251.509	251.067	579.542	0	303.122	0.199025	1
circNAA15_3	0	0	1	0	0	0	0	0	251.067	0	0	0	-1.79518	1
circNAA16	1	1	1	2	1	2	299.85	251.509	251.067	579.542	342.466	606.244	0.875106	0.726803
circNAA35	1	0	0	1	0	0	299.85	0	0	289.771	0	0	0.154837	1
circNAA50	0	1	2	8	0	5	0	251.509	502.134	2318.17	0	1515.61	2.17273	0.202148
circNAALADL2	0	0	0	2	0	0	0	0	0	579.542	0	0	2.72928	0.562025
circNALCN_1	3	1	0	0	0	0	899.55	251.509	0	0	0	0	-3.49632	0.197441
circNALCN_2	7	10	2	5	2	4	2098.95	2515.09	502.134	1448.86	684.932	1212.49	-0.568961	0.49116
circNALCN_3	1	0	0	1	0	2	299.85	0	0	289.771	0	606.244	1.46882	0.63445
circNARS_1	3	0	0	3	2	2	899.55	0	0	869.313	684.932	606.244	1.32889	0.354042
circNARS_2	1	0	2	1	0	1	299.85	0	502.134	289.771	0	303.122	-0.313176	1
circNBEA_1	0	2	0	0	0	0	0	503.018	0	0	0	0	-2.55037	0.554268
circNBEA_2	0	1	4	1	1	1	0	251.509	1004.27	289.771	342.466	303.122	-0.447274	1
circNBR1	2	0	0	0	0	0	599.7	0	0	0	0	0	-2.64132	0.57471
circNBR1	0	0	2	2	0	0	0	0	502.134	579.542	0	0	0.179306	1
circNCOA6	0	1	3	0	2	1	0	251.509	753.201	0	684.932	303.122	-0.124292	1
circNCOR1_1	3	4	7	7	8	10	899.55	1006.04	1757.47	2028.4	2739.73	3031.22	1.03946	0.0393248
circNCOR1_2	1	2	1	1	0	0	299.85	503.018	251.067	289.771	0	0	-1.48626	0.375275
circNCOR1_3	0	0	1	1	1	2	0	0	251.067	289.771	342.466	606.244	1.85408	0.375275
circNCOR1_4	1	0	2	1	0	1	299.85	0	502.134	289.771	0	303.122	-0.313176	1
circNDEL1_1	0	1	0	2	1	1	0	251.509	0	579.542	342.466	303.122	1.85405	0.375275
circNDEL1_2	1	1	0	0	1	0	299.85	251.509	0	0	342.466	0	-0.612747	1
circNDFIP2_1	2	8	3	2	0	1	599.7	2012.07	753.201	579.542	0	303.122	-1.77377	0.0809363
circNDFIP2_2	0	1	0	2	1	2	0	251.509	0	579.542	342.466	606.244	2.15281	0.219059
circNDFIP2_3	0	1	2	0	0	0	0	251.509	502.134	0	0	0	-3.07143	0.255717
circNDFIP2_4	0	0	1	1	0	1	0	0	251.067	289.771	0	303.122	0.964526	1
circNDFIP2_5	0	1	0	0	0	0	0	251.509	0	0	0	0	-1.79524	1
circNDUFS1_1	1	1	0	0	0	0	299.85	251.509	0	0	0	0	-2.573	0.50033
circNDUFS1_2	0	1	0	0	0	0	0	251.509	0	0	0	0	-1.79524	1
circNDUFV2	6	6	3	7	3	6	1799.1	1509.05	753.201	2028.4	1027.4	1818.73	0.309247	0.721019
circNECTIN3	2	0	0	3	0	1	599.7	0	0	869.313	0	303.122	0.973994	0.777738
circNEK1_1	0	0	0	0	2	2	0	0	0	0	684.932	606.244	3.66014	0.142512
circNEK1_2	1	0	0	4	0	1	299.85	0	0	1159.08	0	303.122	2.07503	0.361127
circNEK4	4	3	1	1	2	2	1199.4	754.527	251.067	289.771	684.932	606.244	-0.428788	0.581607
circNELFCD	0	0	0	1	1	0	0	0	0	289.771	342.466	0	2.76159	0.500299
circNF1_1	2	1	1	0	0	0	599.7	251.509	251.067	0	0	0	-3.44631	0.125165
circNF1_2	0	1	1	0	0	0	0	251.509	251.067	0	0	0	-2.57269	0.500296
circNFAT5	0	1	0	0	2	0	0	251.509	0	0	684.932	0	1.04128	1
circNFATC3	1	0	2	0	0	0	299.85	0	502.134	0	0	0	-3.07493	0.254232
circNFIB	1	0	0	0	0	0	299.85	0	0	0	0	0	-1.80267	1
circNFIX	1	0	2	0	4	2	299.85	0	502.134	0	1369.86	606.244	1.16583	0.510897
circNFKB1_1	1	0	0	1	0	1	299.85	0	0	289.771	0	303.122	0.964417	1
circNFKB1_2	0	5	1	3	0	2	0	1257.55	251.067	869.313	0	606.244	-0.0299827	1
circNFYC_1	0	0	0	1	2	1	0	0	0	289.771	684.932	303.122	3.65111	0.125165
circNFYC_2	0	0	0	0	1	1	0	0	0	0	342.466	303.122	2.76169	0.500328
circNFYC_3	0	0	1	0	0	0	0	0	251.067	0	0	0	-1.79518	1
circNGLY1	0	0	1	0	0	0	0	0	251.067	0	0	0	-1.79518	1
circNIPBL	3	5	1	0	1	0	899.55	1257.55	251.067	0	342.466	0	-2.57763	0.0581895
circNKAP	3	1	0	1	0	1	899.55	251.509	0	289.771	0	303.122	-0.728235	0.728384
circNKTR_1	4	1	3	1	0	1	1199.4	251.509	753.201	289.771	0	303.122	-1.62081	0.116156
circNKTR_2	0	0	0	0	1	0	0	0	0	0	342.466	0	1.96574	1
circNOL10_1	0	1	0	1	0	1	0	251.509	0	289.771	0	303.122	0.964525	1
circNOL10_2	0	1	0	0	0	0	0	251.509	0	0	0	0	-1.79524	1
circNONO	0	0	1	0	0	0	0	0	251.067	0	0	0	-1.79518	1
circNOS3	0	0	0	0	1	1	0	0	0	0	342.466	303.122	2.76169	0.500328
circNOTCH2	0	0	3	0	0	0	0	0	753.201	0	0	0	-3.029	0.419947
circNOTCH3	2	0	0	0	0	0	599.7	0	0	0	0	0	-2.64132	0.57471
circnovel_1	1	0	2	0	0	0	299.85	0	502.134	0	0	0	-3.07493	0.254232
circnovel_2	1	1	0	0	0	0	299.85	251.509	0	0	0	0	-2.573	0.50033
circnovel_3	0	1	1	1	1	2	0	251.509	251.067	289.771	342.466	606.244	1.07824	0.687706
circnovel_4	1	0	1	0	2	2	299.85	0	251.067	0	684.932	606.244	1.07921	0.691308
circnovel_5	0	2	0	1	0	0	0	503.018	0	289.771	0	0	-0.607845	1
circNOX4	0	0	0	1	1	0	0	0	0	289.771	342.466	0	2.76159	0.500299
circNPAT_1	3	2	0	0	0	0	899.55	503.018	0	0	0	0	-3.77083	0.102899
circNPAT_2	0	0	1	0	0	0	0	0	251.067	0	0	0	-1.79518	1
circNPEPPS	1	0	1	0	0	0	299.85	0	251.067	0	0	0	-2.57299	0.50033
circNPLOC4	0	0	0	0	1	1	0	0	0	0	342.466	303.122	2.76169	0.500328
circNR2C1	1	0	0	2	1	2	299.85	0	0	579.542	342.466	606.244	2.1527	0.219059
circNR3C2	3	1	0	2	1	3	899.55	251.509	0	579.542	342.466	909.366	0.743799	0.761622
circNRDC	0	0	0	3	0	2	0	0	0	869.313	0	606.244	3.92929	0.0905086
circNSD1_1	0	0	0	1	0	0	0	0	0	289.771	0	0	1.9573	1
circNSD1_2	0	0	1	0	0	0	0	0	251.067	0	0	0	-1.79518	1
circNSUN6_1	0	0	1	1	0	1	0	0	251.067	289.771	0	303.122	0.964526	1
circNSUN6_2	0	0	1	0	1	1	0	0	251.067	0	342.466	303.122	0.964631	1
circNTRK2	1	0	3	0	3	0	299.85	0	753.201	0	1027.4	0	-0.0796521	1
circNUCB1	0	0	0	4	1	3	0	0	0	1159.08	342.466	909.366	4.5923	0.0078607
circNUCKS1_1	0	0	0	2	0	2	0	0	0	579.542	0	606.244	3.64687	0.131867
circNUCKS1_2	1	0	3	0	0	0	299.85	0	753.201	0	0	0	-3.44245	0.166595
circNUCKS1_3	4	0	0	0	1	1	1199.4	0	0	0	342.466	303.122	-0.771608	0.814469
circNUDT21	2	1	0	0	0	0	599.7	251.509	0	0	0	0	-3.08454	0.264807
circNUP155_1	0	0	1	0	0	0	0	0	251.067	0	0	0	-1.79518	1
circNUP155_2	0	0	1	0	0	0	0	0	251.067	0	0	0	-1.79518	1
circNUP155_3	0	0	1	0	0	0	0	0	251.067	0	0	0	-1.79518	1
circNUPL2	1	1	0	0	0	0	299.85	251.509	0	0	0	0	-2.573	0.50033
circNUS1	1	0	2	0	0	0	299.85	0	502.134	0	0	0	-3.07493	0.254232
circOAT	0	0	0	1	0	1	0	0	0	289.771	0	303.122	2.76148	0.50011
circODR4	0	2	2	0	5	3	0	503.018	502.134	0	1712.33	909.366	1.23419	0.365037
circODR4	0	0	0	0	1	0	0	0	0	0	342.466	0	1.96574	1
circOGA_1	0	0	1	2	0	1	0	0	251.067	579.542	0	303.122	1.47487	0.630264
circOGA_2	0	1	1	0	1	0	0	251.509	251.067	0	342.466	0	-0.612057	1
circOPHN1	0	0	1	1	1	1	0	0	251.067	289.771	342.466	303.122	1.47683	0.625165
circORC4	0	0	1	1	1	1	0	0	251.067	289.771	342.466	303.122	1.47683	0.625165
circOSBPL1A	1	1	0	0	0	0	299.85	251.509	0	0	0	0	-2.573	0.50033
circOSBPL9_1	1	2	0	0	0	0	299.85	503.018	0	0	0	0	-3.07499	0.254278
circOSBPL9_2	1	0	0	2	0	1	299.85	0	0	579.542	0	303.122	1.46994	0.631709
circOSBPL9_3	0	2	0	0	1	0	0	503.018	0	0	342.466	0	-0.558606	1
circOSGIN2	1	0	0	0	1	1	299.85	0	0	0	342.466	303.122	0.964456	1
circOTUD4_1	2	1	1	0	0	0	599.7	251.509	251.067	0	0	0	-3.44631	0.125165
circOTUD4_2	0	0	0	0	2	2	0	0	0	0	684.932	606.244	3.66014	0.142512
circOTUD4_3	1	1	0	2	0	1	299.85	251.509	0	579.542	0	303.122	0.700778	1
circOXA1L	2	0	1	0	0	0	599.7	0	251.067	0	0	0	-3.08448	0.264853
circOXCT1_1	2	2	2	0	0	0	599.7	503.018	502.134	0	0	0	-3.9864	0.0313532
circOXCT1_2	0	1	1	2	2	2	0	251.509	251.067	579.542	684.932	606.244	1.62442	0.289495
circOXR1	2	1	1	0	1	0	599.7	251.509	251.067	0	342.466	0	-1.48626	0.375275
circP4HA1	1	1	0	1	0	0	299.85	251.509	0	289.771	0	0	-0.613096	1
circPAFAH1B1	4	2	1	2	2	4	1199.4	503.018	251.067	579.542	684.932	1212.49	0.396515	0.803964
circPAK1	0	0	0	1	0	1	0	0	0	289.771	0	303.122	2.76148	0.50011
circPAN3_1	1	3	2	0	0	0	299.85	754.527	502.134	0	0	0	-3.9863	0.0313532
circPAN3_2	2	4	6	1	2	1	599.7	1006.04	1506.4	289.771	684.932	303.122	-1.28886	0.210919
circPAN3_3	1	0	4	0	0	0	299.85	0	1004.27	0	0	0	-3.72804	0.139647
circPAN3_4	24	46	35	39	9	18	7196.4	11569.4	8787.35	11301.1	3082.19	5456.2	-0.46451	0.400941
circPAN3_5	3	8	3	2	4	2	899.55	2012.07	753.201	579.542	1369.86	606.244	-0.555535	0.555002
circPAN3_6	0	1	1	0	0	0	0	251.509	251.067	0	0	0	-2.57269	0.500296
circPAN3_7	0	2	1	0	4	3	0	503.018	251.067	0	1369.86	909.366	1.40064	0.411534
circPAPOLA_1	0	4	1	1	0	1	0	1006.04	251.067	289.771	0	303.122	-0.962164	0.746065
circPAPOLA_2	0	2	0	0	0	0	0	503.018	0	0	0	0	-2.55037	0.554268
circPAPOLA_3	1	1	1	1	1	0	299.85	251.509	251.067	289.771	342.466	0	-0.313102	1
circPAPOLA_4	2	0	1	2	1	1	599.7	0	251.067	579.542	342.466	303.122	0.576235	1
circPAPSS1	2	0	3	0	2	2	599.7	0	753.201	0	684.932	606.244	-0.0835404	1
circPARD3_1	0	0	0	0	1	1	0	0	0	0	342.466	303.122	2.76169	0.500328
circPARD3_2	2	3	2	1	3	3	599.7	754.527	502.134	289.771	1027.4	909.366	0.212721	0.790849
circPARL_1	0	0	0	1	1	1	0	0	0	289.771	342.466	303.122	3.27379	0.250165
circPARL_2	5	2	2	2	1	3	1499.25	503.018	502.134	579.542	342.466	909.366	-0.346761	0.61372
circPARP4	1	3	0	0	0	0	299.85	754.527	0	0	0	0	-3.44303	0.166799
circPATJ_1	0	0	2	2	0	1	0	0	502.134	579.542	0	303.122	0.696312	1
circPATJ_2	0	0	1	0	0	0	0	0	251.067	0	0	0	-1.79518	1
circPAXIP1	0	3	2	0	0	0	0	754.527	502.134	0	0	0	-3.72221	0.0854588
circPBRM1_1	0	0	1	2	0	2	0	0	251.067	579.542	0	606.244	1.85165	0.384415
circPBRM1_2	0	0	0	1	0	1	0	0	0	289.771	0	303.122	2.76148	0.50011
circPCDH19	0	1	2	0	0	0	0	251.509	502.134	0	0	0	-3.07143	0.255717
circPCMTD1_1	0	0	1	3	0	2	0	0	251.067	869.313	0	606.244	2.13885	0.271931
circPCMTD1_2	3	1	0	2	0	0	899.55	251.509	0	579.542	0	0	-0.785871	0.787174
circPCMTD2	0	1	0	0	1	1	0	251.509	0	0	342.466	303.122	0.964629	1
circPCSK5	2	2	0	0	1	1	599.7	503.018	0	0	342.466	303.122	-0.684729	0.687706
circPCSK6	0	0	1	1	0	1	0	0	251.067	289.771	0	303.122	0.964526	1
circPCTP	0	1	0	1	2	3	0	251.509	0	289.771	684.932	909.366	2.40029	0.125289
circPDCD4	0	1	0	0	0	0	0	251.509	0	0	0	0	-1.79524	1
circPDCD4_1	20	21	30	16	17	16	5997	5281.69	7532.01	4636.34	5821.92	4849.95	-0.308794	0.277457
circPDCD4_2	0	0	2	0	0	0	0	0	502.134	0	0	0	-2.54964	0.554077
circPDCD4_3	0	0	1	1	1	0	0	0	251.067	289.771	342.466	0	0.964601	1
circPDCD4_4	1	0	0	0	0	0	299.85	0	0	0	0	0	-1.80267	1
circPDCD4_5	0	1	1	1	1	1	0	251.509	251.067	289.771	342.466	303.122	0.700991	1
circPDE4D	0	0	0	1	1	2	0	0	0	289.771	342.466	606.244	3.65103	0.125165
circPDE7A	0	0	0	1	0	0	0	0	0	289.771	0	0	1.9573	1
circPDIA5	0	1	1	0	0	0	0	251.509	251.067	0	0	0	-2.57269	0.500296
circPDLIM5	2	2	0	0	0	0	599.7	503.018	0	0	0	0	-3.45031	0.133087
circPDPK1	3	2	4	6	4	5	899.55	503.018	1004.27	1738.63	1369.86	1515.61	0.930378	0.152669
circPDS5A	0	2	0	1	2	1	0	503.018	0	289.771	684.932	303.122	1.07831	0.687706
circPDS5B	1	0	0	1	0	1	299.85	0	0	289.771	0	303.122	0.964417	1
circPER2	0	0	0	3	0	2	0	0	0	869.313	0	606.244	3.92929	0.0905086
circPGM1	0	0	0	3	0	1	0	0	0	869.313	0	303.122	3.62424	0.174128
circPGM2L1	0	0	0	1	0	1	0	0	0	289.771	0	303.122	2.76148	0.50011
circPHC3_1	0	0	0	1	0	1	0	0	0	289.771	0	303.122	2.76148	0.50011
circPHC3_2	1	1	0	0	0	0	299.85	251.509	0	0	0	0	-2.573	0.50033
circPHC3_3	2	0	7	3	7	6	599.7	0	1757.47	869.313	2397.26	1818.73	1.05651	0.297959
circPHC3_4	0	1	1	2	1	1	0	251.509	251.067	579.542	342.466	303.122	1.07821	0.687706
circPHC3_5	3	4	2	1	3	4	899.55	1006.04	502.134	289.771	1027.4	1212.49	0.0518234	1
circPHC3_6	0	2	0	1	1	1	0	503.018	0	289.771	342.466	303.122	0.70099	1
circPHF20_1	1	0	2	0	0	0	299.85	0	502.134	0	0	0	-3.07493	0.254232
circPHF20_2	1	0	0	1	0	1	299.85	0	0	289.771	0	303.122	0.964417	1
circPHIP	7	4	4	0	0	0	2098.95	1006.04	1004.27	0	0	0	-5.25629	0.000160606
circPHKB_1	0	1	1	0	1	0	0	251.509	251.067	0	342.466	0	-0.612057	1
circPHKB_2	0	2	1	1	0	1	0	503.018	251.067	289.771	0	303.122	-0.313069	1
circPHLDB2	0	2	2	1	1	0	0	503.018	502.134	289.771	342.466	0	-0.684541	0.687706
circPHLPP1	0	1	0	0	0	0	0	251.509	0	0	0	0	-1.79524	1
circPHTF1	0	0	1	0	0	0	0	0	251.067	0	0	0	-1.79518	1
circPHYHIPL	4	0	0	0	0	0	1199.4	0	0	0	0	0	-3.57742	0.393379
circPIAS1_1	10	8	14	5	8	9	2998.5	2012.07	3514.94	1448.86	2739.73	2728.1	-0.312063	0.499168
circPIAS1_2	0	0	1	1	2	1	0	0	251.067	289.771	684.932	303.122	1.85415	0.375275
circPIAS1_3	18	12	17	22	8	20	5397.3	3018.11	4268.14	6374.96	2739.73	6062.44	0.283318	0.575607
circPIAS1_4	0	0	1	0	0	0	0	0	251.067	0	0	0	-1.79518	1
circPIAS1_5	0	1	2	0	2	2	0	251.509	502.134	0	684.932	606.244	0.588187	1
circPIAS1_6	7	3	8	2	8	8	2098.95	754.527	2008.54	579.542	2739.73	2424.98	0.228863	0.827435
circPIAS1_7	3	2	0	2	1	3	899.55	503.018	0	579.542	342.466	909.366	0.455541	1
circPICALM_1	1	2	2	4	7	5	299.85	503.018	502.134	1159.08	2397.26	1515.61	1.82105	0.00732606
circPICALM_2	2	1	1	6	1	2	599.7	251.509	251.067	1738.63	342.466	606.244	1.28499	0.334808
circPICALM_3	7	5	5	4	9	8	2098.95	1257.55	1255.34	1159.08	3082.19	2424.98	0.519355	0.359025
circPICALM_4	1	0	2	0	2	0	299.85	0	502.134	0	684.932	0	-0.273967	1
circPICALM_5	0	1	0	0	1	1	0	251.509	0	0	342.466	303.122	0.964629	1
circPIGN	2	0	0	0	0	0	599.7	0	0	0	0	0	-2.64132	0.57471
circPIK3C2A_1	3	0	0	0	0	0	899.55	0	0	0	0	0	-3.18695	0.448697
circPIK3C2A_2	0	0	0	1	0	1	0	0	0	289.771	0	303.122	2.76148	0.50011
circPIK3R3	0	0	2	0	0	0	0	0	502.134	0	0	0	-2.54964	0.554077
circPIKFYVE	1	0	2	0	0	0	299.85	0	502.134	0	0	0	-3.07493	0.254232
circPITPNB	0	0	0	4	0	2	0	0	0	1159.08	0	606.244	4.16018	0.0783335
circPJA2	0	2	0	0	0	0	0	503.018	0	0	0	0	-2.55037	0.554268
circPKN2	1	0	1	0	0	0	299.85	0	251.067	0	0	0	-2.57299	0.50033
circPKNOX1_1	1	0	0	2	1	2	299.85	0	0	579.542	342.466	606.244	2.1527	0.219059
circPKNOX1_2	3	3	1	2	0	2	899.55	754.527	251.067	579.542	0	606.244	-0.544884	0.549324
circPKNOX1_3	2	1	1	2	0	1	599.7	251.509	251.067	579.542	0	303.122	-0.17263	1
circPLCB1	0	0	0	0	1	0	0	0	0	0	342.466	0	1.96574	1
circPLCE1	6	1	1	2	0	1	1799.1	251.509	251.067	579.542	0	303.122	-1.20407	0.421713
circPLEKHA5_1	1	0	0	2	1	1	299.85	0	0	579.542	342.466	303.122	1.85394	0.375275
circPLEKHA5_2	0	0	0	1	0	1	0	0	0	289.771	0	303.122	2.76148	0.50011
circPLEKHA5_3	1	0	1	0	1	0	299.85	0	251.067	0	342.466	0	-0.612738	1
circPLEKHA5_4	0	0	1	0	0	0	0	0	251.067	0	0	0	-1.79518	1
circPLIN2_1	0	0	2	2	0	2	0	0	502.134	579.542	0	606.244	1.0727	0.732096
circPLIN2_2	0	2	0	2	0	1	0	503.018	0	579.542	0	303.122	0.695826	1
circPLPP1_1	0	0	0	2	0	1	0	0	0	579.542	0	303.122	3.27024	0.256414
circPLPP1_2	0	2	2	2	0	0	0	503.018	502.134	579.542	0	0	-0.678825	0.738671
circPLXNC1	0	1	0	1	2	0	0	251.509	0	289.771	684.932	0	1.48771	0.641548
circPMS1	1	0	0	0	0	0	299.85	0	0	0	0	0	-1.80267	1
circPOLDIP3_1	0	1	4	0	0	0	0	251.509	1004.27	0	0	0	-3.69935	0.218351
circPOLDIP3_2	0	0	0	1	0	1	0	0	0	289.771	0	303.122	2.76148	0.50011
circPOLR3B	0	0	0	1	0	0	0	0	0	289.771	0	0	1.9573	1
circPPA2	1	0	1	1	3	0	299.85	0	251.067	289.771	1027.4	0	1.09625	0.735277
circPPARG	0	1	0	0	1	1	0	251.509	0	0	342.466	303.122	0.964629	1
circPPFIA1	17	7	18	11	7	10	5097.45	1760.56	4519.21	3187.48	2397.26	3031.22	-0.375521	0.47772
circPPHLN1	1	0	3	0	0	0	299.85	0	753.201	0	0	0	-3.44245	0.166595
circPPIG	1	1	2	0	2	1	299.85	251.509	502.134	0	684.932	303.122	-0.172312	1
circPPM1B	2	0	0	0	1	0	599.7	0	0	0	342.466	0	-0.648141	1
circPPM1D	0	2	1	1	1	1	0	503.018	251.067	289.771	342.466	303.122	0.199237	1
circPPP1R12A	1	0	0	2	0	0	299.85	0	0	579.542	0	0	0.894821	1
circPPP1R12B	0	0	2	2	0	1	0	0	502.134	579.542	0	303.122	0.696312	1
circPPP2R1B	6	9	6	3	4	1	1799.1	2263.58	1506.4	869.313	1369.86	303.122	-1.13463	0.0622499
circPPP2R3A	0	0	2	0	1	1	0	0	502.134	0	342.466	303.122	0.202329	1
circPPP2R5A	0	0	0	1	1	0	0	0	0	289.771	342.466	0	2.76159	0.500299
circPPP4R1	0	2	4	7	5	8	0	503.018	1004.27	2028.4	1712.33	2424.98	1.89177	0.00256241
circPPP6R3_1	1	0	2	0	0	0	299.85	0	502.134	0	0	0	-3.07493	0.254232
circPPP6R3_2	0	1	0	0	0	0	0	251.509	0	0	0	0	-1.79524	1
circPPP6R3_3	0	0	0	1	0	0	0	0	0	289.771	0	0	1.9573	1
circPRELID2_1	0	0	1	0	2	2	0	0	251.067	0	684.932	606.244	1.86514	0.399682
circPRELID2_2	0	1	1	0	0	0	0	251.509	251.067	0	0	0	-2.57269	0.500296
circPREX2	0	0	1	0	1	0	0	0	251.067	0	342.466	0	0.170268	1
circPRKAA2_1	1	0	1	2	0	2	299.85	0	251.067	579.542	0	606.244	1.07802	0.687706
circPRKAA2_2	1	0	0	1	0	1	299.85	0	0	289.771	0	303.122	0.964417	1
circPRKAG2	0	0	0	0	2	1	0	0	0	0	684.932	303.122	3.28545	0.269272
circPRKAR1A_1	6	7	9	12	5	11	1799.1	1760.56	2259.6	3477.25	1712.33	3334.34	0.563092	0.205116
circPRKAR1A_2	3	3	0	3	1	1	899.55	754.527	0	869.313	342.466	303.122	-0.0478676	1
circPRKCI	0	0	0	2	0	0	0	0	0	579.542	0	0	2.72928	0.562025
circPRKD3	1	4	0	1	1	1	299.85	1006.04	0	289.771	342.466	303.122	-0.461652	0.753729
circPRKDC	0	1	0	0	0	0	0	251.509	0	0	0	0	-1.79524	1
circPRPF40A_1	4	1	1	0	1	0	1199.4	251.509	251.067	0	342.466	0	-2.05005	0.19896
circPRPF40A_1	1	0	2	1	0	1	299.85	0	502.134	289.771	0	303.122	-0.313176	1
circPRPF40A_2	1	0	1	0	0	0	299.85	0	251.067	0	0	0	-2.57299	0.50033
circPRPF40A_2	0	1	0	0	0	1	0	251.509	0	0	0	303.122	0.164109	1
circPRPF40A_3	15	9	13	14	10	9	4497.75	2263.58	3263.87	4056.8	3424.66	2728.1	0.057789	1
circPRPSAP1	0	0	1	0	0	0	0	0	251.067	0	0	0	-1.79518	1
circPSD3_1	0	0	0	0	2	2	0	0	0	0	684.932	606.244	3.66014	0.142512
circPSD3_2	1	2	1	5	3	1	299.85	503.018	251.067	1448.86	1027.4	303.122	1.30943	0.182234
circPSD3_3	3	3	2	6	2	5	899.55	754.527	502.134	1738.63	684.932	1515.61	0.890961	0.19027
circPSIP1	0	0	0	0	1	0	0	0	0	0	342.466	0	1.96574	1
circPSMC6	0	0	0	0	1	0	0	0	0	0	342.466	0	1.96574	1
circPSMD2	1	0	0	0	1	1	299.85	0	0	0	342.466	303.122	0.964456	1
circPSME4	2	6	2	2	7	4	599.7	1509.05	502.134	579.542	2397.26	1212.49	0.614329	0.517448
circPSPC1_1	0	2	1	4	6	3	0	503.018	251.067	1159.08	2054.79	909.366	2.19532	0.0042432
circPSPC1_2	3	1	8	1	1	0	899.55	251.509	2008.54	289.771	342.466	0	-2.16617	0.0909577
circPSPC1_3	1	3	2	2	0	0	299.85	754.527	502.134	579.542	0	0	-1.22484	0.289495
circPTBP3_1	1	5	5	2	1	1	299.85	1257.55	1255.34	579.542	342.466	303.122	-1.16762	0.180237
circPTBP3_2	0	0	4	0	1	1	0	0	1004.27	0	342.466	303.122	-0.612221	0.802763
circPTBP3_3	0	1	1	1	2	0	0	251.509	251.067	289.771	684.932	0	0.704165	1
circPTGES3	3	5	6	4	1	2	899.55	1257.55	1506.4	1159.08	342.466	606.244	-0.747489	0.384418
circPTK2_1	3	3	4	0	3	2	899.55	754.527	1004.27	0	1027.4	606.244	-0.736498	0.607842
circPTK2_2	1	0	1	1	0	0	299.85	0	251.067	289.771	0	0	-0.613093	1
circPTK2_3	0	0	2	0	1	1	0	0	502.134	0	342.466	303.122	0.202329	1
circPTP4A1_1	1	3	2	1	0	1	299.85	754.527	502.134	289.771	0	303.122	-1.22481	0.289495
circPTP4A1_2	5	0	1	0	7	2	1499.25	0	251.067	0	2397.26	606.244	0.754427	0.770782
circPTP4A1_3	0	5	0	3	2	2	0	1257.55	0	869.313	684.932	606.244	0.700058	0.579843
circPTP4A1_4	0	0	2	0	1	0	0	0	502.134	0	342.466	0	-0.557882	1
circPTPN11	2	0	0	0	0	0	599.7	0	0	0	0	0	-2.64132	0.57471
circPTPN9_1	2	1	4	0	1	1	599.7	251.509	1004.27	0	342.466	303.122	-1.43411	0.18012
circPTPN9_2	0	0	0	0	2	1	0	0	0	0	684.932	303.122	3.28545	0.269272
circPTPN9_3	0	0	0	0	1	1	0	0	0	0	342.466	303.122	2.76169	0.500328
circPTPN9_4	1	0	3	1	0	1	299.85	0	753.201	289.771	0	303.122	-0.687609	0.705587
circPTPRJ	0	0	1	0	0	0	0	0	251.067	0	0	0	-1.79518	1
circPUM2_1	1	4	5	0	1	1	299.85	1006.04	1255.34	0	342.466	303.122	-1.92427	0.0662391
circPUM2_2	0	0	0	0	3	2	0	0	0	0	1027.4	606.244	3.98262	0.113764
circPUM3	0	0	0	1	0	0	0	0	0	289.771	0	0	1.9573	1
circPUS7	0	0	0	1	0	0	0	0	0	289.771	0	0	1.9573	1
circPUS7	1	0	0	0	0	0	299.85	0	0	0	0	0	-1.80267	1
circQKI	0	0	0	0	3	1	0	0	0	0	1027.4	303.122	3.69662	0.201279
circQRICH1	1	0	1	0	2	0	299.85	0	251.067	0	684.932	0	0.211347	1
circQRICH1	2	1	0	0	1	1	599.7	251.509	0	0	342.466	303.122	-0.313933	1
circQSER1_1	0	0	0	2	0	0	0	0	0	579.542	0	0	2.72928	0.562025
circQSER1_2	2	4	4	0	6	5	599.7	1006.04	1004.27	0	2054.79	1515.61	0.401596	0.783094
circR3HDM1_1	1	0	1	2	0	0	299.85	0	251.067	579.542	0	0	0.166932	1
circR3HDM1_2	0	1	1	1	1	0	0	251.509	251.067	289.771	342.466	0	0.188759	1
circRAB10	0	0	0	0	2	1	0	0	0	0	684.932	303.122	3.28545	0.269272
circRAB28	0	1	0	0	2	2	0	251.509	0	0	684.932	606.244	1.86504	0.399714
circRAB32	2	0	1	0	0	0	599.7	0	251.067	0	0	0	-3.08448	0.264853
circRAB3IP_1	0	0	3	0	0	0	0	0	753.201	0	0	0	-3.029	0.419947
circRAB3IP_2	0	1	0	1	0	1	0	251.509	0	289.771	0	303.122	0.964525	1
circRAB6A_1	0	0	0	0	5	3	0	0	0	0	1712.33	909.366	4.64846	0.0534629
circRAB6A_2	0	1	1	0	0	0	0	251.509	251.067	0	0	0	-2.57269	0.500296
circRAB6A_3	0	0	1	0	0	0	0	0	251.067	0	0	0	-1.79518	1
circRABEP1	0	1	0	0	0	0	0	251.509	0	0	0	0	-1.79524	1
circRABGAP1_1	4	1	0	0	0	0	1199.4	251.509	0	0	0	0	-3.81876	0.168168
circRABGAP1_2	0	0	0	1	1	1	0	0	0	289.771	342.466	303.122	3.27379	0.250165
circRABGAP1_3	0	0	2	0	1	0	0	0	502.134	0	342.466	0	-0.557882	1
circRABGAP1L	1	0	0	1	4	2	299.85	0	0	289.771	1369.86	606.244	2.61804	0.0573741
circRAD18	2	1	1	0	0	0	599.7	251.509	251.067	0	0	0	-3.44631	0.125165
circRAD23B_1	2	2	3	1	1	2	599.7	503.018	753.201	289.771	342.466	606.244	-0.544669	0.754177
circRAD23B_2	0	1	0	1	0	0	0	251.509	0	289.771	0	0	0.162475	1
circRAD51C	1	0	2	2	0	1	299.85	0	502.134	579.542	0	303.122	0.197616	1
circRAD54B	2	0	0	0	0	0	599.7	0	0	0	0	0	-2.64132	0.57471
circRAF1	2	0	0	0	1	0	599.7	0	0	0	342.466	0	-0.648141	1
circRALGAPA1_1	4	4	5	3	6	2	1199.4	1006.04	1255.34	869.313	2054.79	606.244	-0.016313	1
circRALGAPA1_2	0	0	1	0	0	0	0	0	251.067	0	0	0	-1.79518	1
circRALGPS1	1	0	0	0	0	0	299.85	0	0	0	0	0	-1.80267	1
circRANBP9_1	0	0	0	4	0	2	0	0	0	1159.08	0	606.244	4.16018	0.0783335
circRANBP9_2	0	0	0	1	0	1	0	0	0	289.771	0	303.122	2.76148	0.50011
circRANBP9_3	0	0	0	1	0	1	0	0	0	289.771	0	303.122	2.76148	0.50011
circRANBP9_4	0	0	1	1	0	0	0	0	251.067	289.771	0	0	0.162537	1
circRAPGEF2	0	1	0	0	2	2	0	251.509	0	0	684.932	606.244	1.86504	0.399714
circRARS	0	0	1	0	2	1	0	0	251.067	0	684.932	303.122	1.49045	0.641416
circRASA2_1	0	0	0	4	3	2	0	0	0	1159.08	1027.4	606.244	4.7557	0.00197252
circRASA2_2	0	2	1	0	0	0	0	503.018	251.067	0	0	0	-3.07143	0.255788
circRASA2_3	3	0	0	2	0	2	899.55	0	0	579.542	0	606.244	0.449663	1
circRASEF	0	0	2	0	0	0	0	0	502.134	0	0	0	-2.54964	0.554077
circRASGEF1B	5	1	2	0	1	0	1499.25	251.509	502.134	0	342.466	0	-2.44378	0.0942463
circRASGRF2	4	0	1	0	0	0	1199.4	0	251.067	0	0	0	-3.8185	0.16829
circRB1CC1	0	3	0	3	2	2	0	754.527	0	869.313	684.932	606.244	1.33374	0.344291
circRBL1	1	2	0	0	3	1	299.85	503.018	0	0	1027.4	303.122	0.611058	1
circRBM6_1	2	0	0	0	0	0	599.7	0	0	0	0	0	-2.64132	0.57471
circRBM6_2	6	2	4	4	3	3	1799.1	503.018	1004.27	1159.08	1027.4	909.366	-0.0380551	1
circRBM6_3	0	0	1	0	0	0	0	0	251.067	0	0	0	-1.79518	1
circRC3H1	0	0	0	1	0	1	0	0	0	289.771	0	303.122	2.76148	0.50011
circRDH11	2	0	0	0	0	0	599.7	0	0	0	0	0	-2.64132	0.57471
circRDX	0	0	1	0	0	0	0	0	251.067	0	0	0	-1.79518	1
circRERE_1	0	4	3	0	1	0	0	1006.04	753.201	0	342.466	0	-2.17362	0.231773
circRERE_2	2	1	2	0	2	0	599.7	251.509	502.134	0	684.932	0	-0.97888	0.458367
circREV1_1	3	3	1	0	1	1	899.55	754.527	251.067	0	342.466	303.122	-1.43422	0.18012
circREV1_2	3	1	1	0	1	0	899.55	251.509	251.067	0	342.466	0	-1.78704	0.238784
circREV1_3	0	0	1	1	0	1	0	0	251.067	289.771	0	303.122	0.964526	1
circREV3L	0	0	0	1	0	0	0	0	0	289.771	0	0	1.9573	1
circRFC1	0	0	2	0	2	2	0	0	502.134	0	684.932	606.244	1.12021	0.749453
circRFX7	0	0	1	0	0	0	0	0	251.067	0	0	0	-1.79518	1
circRHBDD1	1	3	6	1	2	2	299.85	754.527	1506.4	289.771	684.932	606.244	-0.729336	0.624168
circRHOBTB1	0	0	0	1	1	2	0	0	0	289.771	342.466	606.244	3.65103	0.125165
circRHOT1_1	0	1	0	2	0	2	0	251.509	0	579.542	0	606.244	1.8516	0.384433
circRHOT1_2	0	0	0	0	1	1	0	0	0	0	342.466	303.122	2.76169	0.500328
circRHOT1_3	0	0	1	0	2	0	0	0	251.067	0	684.932	0	1.04188	1
circRHOT1_4	0	0	0	1	0	0	0	0	0	289.771	0	0	1.9573	1
circRICTOR	1	0	2	0	0	0	299.85	0	502.134	0	0	0	-3.07493	0.254232
circRILPL1	0	1	1	1	1	2	0	251.509	251.067	289.771	342.466	606.244	1.07824	0.687706
circRIMS1_1	3	15	10	4	4	6	899.55	3772.64	2510.67	1159.08	1369.86	1818.73	-0.73527	0.2924
circRIMS1_2	0	3	1	0	1	0	0	754.527	251.067	0	342.466	0	-1.44111	0.454958
circRIMS1_3	0	1	1	0	0	0	0	251.509	251.067	0	0	0	-2.57269	0.500296
circRIMS1_4	1	0	1	0	0	0	299.85	0	251.067	0	0	0	-2.57299	0.50033
circRIMS1_5	0	0	1	0	0	0	0	0	251.067	0	0	0	-1.79518	1
circRINT1	1	0	0	0	1	0	299.85	0	0	0	342.466	0	0.161666	1
circRIOK3	0	2	0	1	0	1	0	503.018	0	289.771	0	303.122	0.189613	1
circRNASEH1	2	0	3	1	0	0	599.7	0	753.201	289.771	0	0	-1.79507	0.269198
circRNF10	1	1	2	1	0	0	299.85	251.509	502.134	289.771	0	0	-1.48626	0.375275
circRNF111_1	3	1	1	0	0	0	899.55	251.509	251.067	0	0	0	-3.74961	0.070151
circRNF111_2	0	1	4	1	3	1	0	251.509	1004.27	289.771	1027.4	303.122	0.261355	0.809852
circRNF115	1	4	6	2	6	4	299.85	1006.04	1506.4	579.542	2054.79	1212.49	0.369183	0.731762
circRNF121	1	5	1	3	1	2	299.85	1257.55	251.067	869.313	342.466	606.244	0.00291232	1
circRNF138	3	0	1	5	0	2	899.55	0	251.067	1448.86	0	606.244	0.852078	0.719731
circRNF145	7	1	0	1	2	2	2098.95	251.509	0	289.771	684.932	606.244	-0.513002	0.882684
circRNF169_1	1	1	5	2	1	2	299.85	251.509	1255.34	579.542	342.466	606.244	-0.242771	1
circRNF169_2	0	1	0	0	1	1	0	251.509	0	0	342.466	303.122	0.964629	1
circRNF2	0	0	0	0	1	1	0	0	0	0	342.466	303.122	2.76169	0.500328
circRNF216_1	0	1	0	1	0	1	0	251.509	0	289.771	0	303.122	0.964525	1
circRNF216_2	0	0	1	0	0	0	0	0	251.067	0	0	0	-1.79518	1
circRNF216_3	1	1	2	0	2	2	299.85	251.509	502.134	0	684.932	606.244	0.204932	1
circRNF219	1	1	4	0	2	2	299.85	251.509	1004.27	0	684.932	606.244	-0.318097	1
circROCK1	0	1	0	0	1	1	0	251.509	0	0	342.466	303.122	0.964629	1
circRPAP2_1	1	1	0	0	0	0	299.85	251.509	0	0	0	0	-2.573	0.50033
circRPAP2_2	0	0	1	1	0	0	0	0	251.067	289.771	0	0	0.162537	1
circRPL3	1	0	0	1	1	0	299.85	0	0	289.771	342.466	0	0.964371	1
circRPRD1B	1	0	1	0	1	1	299.85	0	251.067	0	342.466	303.122	0.188681	1
circRPRD2	0	0	2	0	0	0	0	0	502.134	0	0	0	-2.54964	0.554077
circRPS6KB1_1	1	0	1	0	0	0	299.85	0	251.067	0	0	0	-2.57299	0.50033
circRPS6KB1_2	0	2	0	0	0	0	0	503.018	0	0	0	0	-2.55037	0.554268
circRPS6KB1_3	1	0	0	0	0	0	299.85	0	0	0	0	0	-1.80267	1
circRPS6KB1_4	0	1	1	0	2	1	0	251.509	251.067	0	684.932	303.122	0.704711	1
circRPS6KB1_5	0	0	1	0	0	0	0	0	251.067	0	0	0	-1.79518	1
circRPS6KC1_1	0	0	0	1	0	1	0	0	0	289.771	0	303.122	2.76148	0.50011
circRPS6KC1_2	0	1	0	0	0	0	0	251.509	0	0	0	0	-1.79524	1
circRPSA	0	0	1	0	0	0	0	0	251.067	0	0	0	-1.79518	1
circRRAS2	0	0	0	0	3	2	0	0	0	0	1027.4	606.244	3.98262	0.113764
circRRP15	6	0	5	3	7	4	1799.1	0	1255.34	869.313	2397.26	1212.49	0.546289	0.729627
circRSC1A1	1	0	0	0	0	0	299.85	0	0	0	0	0	-1.80267	1
circRSF1_1	0	7	2	0	0	0	0	1760.56	502.134	0	0	0	-4.48254	0.0851266
circRSF1_2	2	0	0	0	0	0	599.7	0	0	0	0	0	-2.64132	0.57471
circRSF1_3	2	1	0	2	0	0	599.7	251.509	0	579.542	0	0	-0.373236	1
circRSRC1_1	2	5	1	0	0	0	599.7	1257.55	251.067	0	0	0	-4.37521	0.0256804
circRSRC1_2	0	5	3	1	3	2	0	1257.55	753.201	289.771	1027.4	606.244	-0.135201	1
circRTTN_3	0	0	3	0	0	0	0	0	753.201	0	0	0	-3.029	0.419947
circRUFY1	2	5	1	2	1	2	599.7	1257.55	251.067	579.542	342.466	606.244	-0.428677	0.774711
circRUFY3	0	3	1	2	0	0	0	754.527	251.067	579.542	0	0	-0.679172	0.775555
circRXFP1	0	2	0	0	0	0	0	503.018	0	0	0	0	-2.55037	0.554268
circS100PBP	2	1	1	3	0	2	599.7	251.509	251.067	869.313	0	606.244	0.500751	1
circSACM1L	0	2	0	2	0	0	0	503.018	0	579.542	0	0	0.178084	1
circSAMD4A	0	0	1	5	2	4	0	0	251.067	1448.86	684.932	1212.49	3.23838	0.00346001
circSAMD4B	0	1	0	0	1	1	0	251.509	0	0	342.466	303.122	0.964629	1
circSASH1	0	0	0	0	1	0	0	0	0	0	342.466	0	1.96574	1
circSBNO1	0	0	0	0	2	1	0	0	0	0	684.932	303.122	3.28545	0.269272
circSCAF11	1	1	0	0	1	0	299.85	251.509	0	0	342.466	0	-0.612747	1
circSCAF4	2	1	2	1	3	1	599.7	251.509	502.134	289.771	1027.4	303.122	0.208452	1
circSCAF8_1	2	0	0	0	1	1	599.7	0	0	0	342.466	303.122	0.166788	1
circSCAF8_2	1	1	1	3	0	1	299.85	251.509	251.067	869.313	0	303.122	0.572111	1
circSCAF8_3	0	0	1	0	0	0	0	0	251.067	0	0	0	-1.79518	1
circSCAI	1	0	0	0	0	0	299.85	0	0	0	0	0	-1.80267	1
circSCAMP1	0	0	0	0	2	1	0	0	0	0	684.932	303.122	3.28545	0.269272
circSCARB1	0	0	1	0	0	0	0	0	251.067	0	0	0	-1.79518	1
circSCLT1	0	0	0	0	1	0	0	0	0	0	342.466	0	1.96574	1
circSCMH1_1	0	0	0	0	1	1	0	0	0	0	342.466	303.122	2.76169	0.500328
circSCMH1_2	1	0	1	1	1	1	299.85	0	251.067	289.771	342.466	303.122	0.700883	1
circSCPEP1	1	0	1	0	0	0	299.85	0	251.067	0	0	0	-2.57299	0.50033
circSCYL2	1	1	0	2	2	2	299.85	251.509	0	579.542	684.932	606.244	1.62431	0.289495
circSDAD1	0	1	0	3	0	0	0	251.509	0	869.313	0	0	1.44429	0.748288
circSEC13	0	5	2	0	1	1	0	1257.55	502.134	0	342.466	303.122	-1.37858	0.425236
circSEC23B_1	1	0	1	0	0	0	299.85	0	251.067	0	0	0	-2.57299	0.50033
circSEC23B_2	1	0	0	0	0	0	299.85	0	0	0	0	0	-1.80267	1
circSEC23B_3	0	0	0	1	0	0	0	0	0	289.771	0	0	1.9573	1
circSEC24A_1	0	0	1	2	1	2	0	0	251.067	579.542	342.466	606.244	2.15281	0.219059
circSEC24A_2	0	1	0	3	0	3	0	251.509	0	869.313	0	909.366	2.38257	0.195499
circSEC24A_3	1	1	1	0	0	0	299.85	251.509	251.067	0	0	0	-3.07466	0.250165
circSEC24A_4	0	1	2	0	0	0	0	251.509	502.134	0	0	0	-3.07143	0.255717
circSEC24A_5	2	1	2	1	0	1	599.7	251.509	502.134	289.771	0	303.122	-0.98001	0.453486
circSEC24A_6	1	1	0	0	0	0	299.85	251.509	0	0	0	0	-2.573	0.50033
circSEC24A_7	1	1	0	0	2	1	299.85	251.509	0	0	684.932	303.122	0.702444	1
circSEC24A_8	0	2	2	1	3	1	0	503.018	502.134	289.771	1027.4	303.122	0.509021	1
circSEC24A_9	0	0	0	1	0	0	0	0	0	289.771	0	0	1.9573	1
circSEC24B_1	0	1	2	2	1	1	0	251.509	502.134	579.542	342.466	303.122	0.576452	1
circSEC24B_2	3	0	1	3	1	1	899.55	0	251.067	869.313	342.466	303.122	0.478175	1
circSEC24D	0	1	1	0	0	0	0	251.509	251.067	0	0	0	-2.57269	0.500296
circSEC62_1	0	0	0	0	1	0	0	0	0	0	342.466	0	1.96574	1
circSEC62_2	1	1	0	1	0	0	299.85	251.509	0	289.771	0	0	-0.613096	1
circSEC63	2	0	0	0	0	0	599.7	0	0	0	0	0	-2.64132	0.57471
circSECISBP2	1	0	0	1	1	0	299.85	0	0	289.771	342.466	0	0.964371	1
circSECISBP2	0	0	1	0	0	0	0	0	251.067	0	0	0	-1.79518	1
circSENP7_1	2	0	0	0	0	0	599.7	0	0	0	0	0	-2.64132	0.57471
circSENP7_2	0	2	0	1	0	1	0	503.018	0	289.771	0	303.122	0.189613	1
circSENP7_3	1	1	0	1	0	0	299.85	251.509	0	289.771	0	0	-0.613096	1
circSENP7_4	1	0	0	0	0	0	299.85	0	0	0	0	0	-1.80267	1
circSEPT7_5	2	0	0	0	0	0	599.7	0	0	0	0	0	-2.64132	0.57471
circSERINC2	0	0	1	0	0	0	0	0	251.067	0	0	0	-1.79518	1
circSESTD1	1	0	0	1	0	1	299.85	0	0	289.771	0	303.122	0.964417	1
circSETBP1	1	1	1	2	2	0	299.85	251.509	251.067	579.542	684.932	0	0.576418	1
circSETD2_1	0	2	0	1	2	1	0	503.018	0	289.771	684.932	303.122	1.07831	0.687706
circSETD2_2	0	1	0	0	0	0	0	251.509	0	0	0	0	-1.79524	1
circSETD3	0	5	4	0	5	1	0	1257.55	1004.27	0	1712.33	303.122	-0.202601	1
circSF3B3	1	0	0	1	0	0	299.85	0	0	289.771	0	0	0.154837	1
circSH3BP4	0	0	3	0	1	0	0	0	753.201	0	342.466	0	-1.01827	0.760558
circSH3GLB1_1	3	4	3	4	3	4	899.55	1006.04	753.201	1159.08	1027.4	1212.49	0.348969	0.664362
circSH3GLB1_2	0	3	2	1	2	1	0	754.527	502.134	289.771	684.932	303.122	-0.0901693	1
circSHANK2	0	1	0	0	2	1	0	251.509	0	0	684.932	303.122	1.49036	0.641437
circSHOC2	1	0	0	0	0	0	299.85	0	0	0	0	0	-1.80267	1
circSIN3A	0	0	1	0	1	0	0	0	251.067	0	342.466	0	0.170268	1
circSLAIN2_1	2	0	1	0	0	0	599.7	0	251.067	0	0	0	-3.08448	0.264853
circSLAIN2_2	1	0	0	1	0	1	299.85	0	0	289.771	0	303.122	0.964417	1
circSLC15A2	3	0	0	0	0	0	899.55	0	0	0	0	0	-3.18695	0.448697
circSLC25A3	2	0	1	1	0	1	599.7	0	251.067	289.771	0	303.122	-0.314516	1
circSLC25A40	2	0	0	0	0	0	599.7	0	0	0	0	0	-2.64132	0.57471
circSLC30A7_1	2	0	1	5	2	1	599.7	0	251.067	1448.86	684.932	303.122	1.49871	0.284035
circSLC30A7_2	0	0	3	1	0	0	0	0	753.201	289.771	0	0	-1.10003	0.750389
circSLC33A1_1	0	1	7	1	0	1	0	251.509	1757.47	289.771	0	303.122	-1.58526	0.422411
circSLC33A1_2	2	0	2	1	3	2	599.7	0	502.134	289.771	1027.4	606.244	0.751009	0.549324
circSLC33A1_3	1	0	0	0	0	0	299.85	0	0	0	0	0	-1.80267	1
circSLC33A1_4	0	1	0	0	0	0	0	251.509	0	0	0	0	-1.79524	1
circSLC38A10	0	1	3	2	0	0	0	251.509	753.201	579.542	0	0	-0.678521	0.775383
circSLC38A9_1	1	1	1	1	0	0	299.85	251.509	251.067	289.771	0	0	-1.11471	0.625165
circSLC38A9_2	0	3	3	1	1	2	0	754.527	753.201	289.771	342.466	606.244	-0.335155	1
circSLC38A9_3	0	0	1	0	1	1	0	0	251.067	0	342.466	303.122	0.964631	1
circSLC39A8_4	1	2	3	2	2	2	299.85	503.018	753.201	579.542	684.932	606.244	0.210923	1
circSLC39A8_5	1	1	0	1	1	0	299.85	251.509	0	289.771	342.466	0	0.18865	1
circSLC5A10_1	8	10	4	5	1	2	2398.8	2515.09	1004.27	1448.86	342.466	606.244	-1.21586	0.0875728
circSLC5A10_2	0	5	3	0	1	1	0	1257.55	753.201	0	342.466	303.122	-1.56261	0.307971
circSLC5A10_3	0	8	1	7	8	7	0	2012.07	251.067	2028.4	2739.73	2121.86	1.52964	0.17755
circSLC5A10_4	0	3	0	2	2	3	0	754.527	0	579.542	684.932	909.366	1.33377	0.344291
circSLC5A10_5	0	1	0	0	2	0	0	251.509	0	0	684.932	0	1.04128	1
circSLC5A10_6	0	0	0	0	1	0	0	0	0	0	342.466	0	1.96574	1
circSLC5A10_7	0	1	2	0	1	1	0	251.509	502.134	0	342.466	303.122	-0.312963	1
circSLC5A10_8	2	1	0	1	1	1	599.7	251.509	0	289.771	342.466	303.122	0.19902	1
circSLC6A14	0	1	1	0	0	0	0	251.509	251.067	0	0	0	-2.57269	0.500296
circSLC7A6_1	1	0	0	0	0	0	299.85	0	0	0	0	0	-1.80267	1
circSLC9A6_2	0	0	1	4	0	2	0	0	251.067	1159.08	0	606.244	2.3744	0.226642
circSLTM_1	6	2	6	1	2	2	1799.1	503.018	1506.4	289.771	684.932	606.244	-1.20791	0.180419
circSLTM_2	0	3	3	1	6	4	0	754.527	753.201	289.771	2054.79	1212.49	1.1144	0.310148
circSLTM_3	0	0	1	0	1	0	0	0	251.067	0	342.466	0	0.170268	1
circSMAD1_1	4	2	2	5	2	4	1199.4	503.018	502.134	1448.86	684.932	1212.49	0.656682	0.360296
circSMAD1_2	1	0	2	0	3	1	299.85	0	502.134	0	1027.4	303.122	0.611558	1
circSMAD1_3	0	0	1	0	1	1	0	0	251.067	0	342.466	303.122	0.964631	1
circSMAD4_1	8	17	5	21	11	12	2398.8	4275.65	1255.34	6085.19	3767.12	3637.47	0.761565	0.15014
circSMAD4_2	0	0	0	1	0	1	0	0	0	289.771	0	303.122	2.76148	0.50011
circSMAD4_3	1	9	1	3	1	2	299.85	2263.58	251.067	869.313	342.466	606.244	-0.604728	0.635996
circSMAD4_4	0	0	2	0	0	0	0	0	502.134	0	0	0	-2.54964	0.554077
circSMAD4_5	0	1	0	1	0	0	0	251.509	0	289.771	0	0	0.162475	1
circSMAD5_1	2	1	2	7	0	3	599.7	251.509	502.134	2028.4	0	909.366	1.10343	0.493419
circSMAD5_2	0	1	2	2	0	2	0	251.509	502.134	579.542	0	606.244	0.576191	1
circSMARCA2	0	0	1	0	0	0	0	0	251.067	0	0	0	-1.79518	1
circSMARCC1_1	1	1	0	0	0	0	299.85	251.509	0	0	0	0	-2.573	0.50033
circSMARCC1_2	2	1	1	1	2	2	599.7	251.509	251.067	289.771	684.932	606.244	0.503555	1
circSMARCC1_3	2	3	2	3	1	2	599.7	754.527	502.134	869.313	342.466	606.244	0.00141094	1
circSMC3	1	0	0	0	2	1	299.85	0	0	0	684.932	303.122	1.47994	0.644328
circSMC4	0	0	0	1	0	1	0	0	0	289.771	0	303.122	2.76148	0.50011
circSMC5	0	0	1	0	0	0	0	0	251.067	0	0	0	-1.79518	1
circSMCHD1_1	1	2	0	1	0	0	299.85	503.018	0	289.771	0	0	-1.11595	0.628878
circSMCHD1_2	2	3	2	2	2	1	599.7	754.527	502.134	579.542	684.932	303.122	-0.245863	1
circSMCHD1_3	0	0	1	0	1	1	0	0	251.067	0	342.466	303.122	0.964631	1
circSMG1_1	1	0	3	3	2	2	299.85	0	753.201	869.313	684.932	606.244	0.962085	0.549324
circSMG1_2	0	1	0	2	1	0	0	251.509	0	579.542	342.466	0	1.47717	0.630425
circSMG1_3	1	0	7	0	2	2	299.85	0	1757.47	0	684.932	606.244	-0.659962	0.74877
circSMG1_4	0	1	0	1	0	1	0	251.509	0	289.771	0	303.122	0.964525	1
circSMG7	0	1	1	4	1	1	0	251.509	251.067	1159.08	342.466	303.122	1.62248	0.307684
circSNAP47	0	1	0	0	0	0	0	251.509	0	0	0	0	-1.79524	1
circSNRK	0	1	0	5	1	3	0	251.509	0	1448.86	342.466	909.366	2.95423	0.0263888
circSNTB2	0	0	1	2	0	2	0	0	251.067	579.542	0	606.244	1.85165	0.384415
circSNX13	0	1	1	1	1	0	0	251.509	251.067	289.771	342.466	0	0.188759	1
circSNX14	0	0	1	0	0	0	0	0	251.067	0	0	0	-1.79518	1
circSNX25_1	0	5	0	4	0	2	0	1257.55	0	1159.08	0	606.244	0.453703	0.888173
circSNX25_2	1	0	0	0	0	0	299.85	0	0	0	0	0	-1.80267	1
circSNX27_1	2	2	1	0	0	0	599.7	503.018	251.067	0	0	0	-3.74149	0.0626375
circSNX27_2	2	0	1	0	0	0	599.7	0	251.067	0	0	0	-3.08448	0.264853
circSNX6	1	3	1	0	0	0	299.85	754.527	251.067	0	0	0	-3.74139	0.0626375
circSNX9	0	0	1	1	1	0	0	0	251.067	289.771	342.466	0	0.964601	1
circSOCS7	0	0	1	0	0	0	0	0	251.067	0	0	0	-1.79518	1
circSORBS1_1	0	0	0	0	1	1	0	0	0	0	342.466	303.122	2.76169	0.500328
circSORBS1_2	0	0	1	0	0	0	0	0	251.067	0	0	0	-1.79518	1
circSORBS1_3	1	0	0	0	0	0	299.85	0	0	0	0	0	-1.80267	1
circSORD	0	1	0	0	0	0	0	251.509	0	0	0	0	-1.79524	1
circSPAG9_1	2	0	1	0	0	0	599.7	0	251.067	0	0	0	-3.08448	0.264853
circSPAG9_2	0	1	1	0	0	0	0	251.509	251.067	0	0	0	-2.57269	0.500296
circSPAG9_3	0	0	0	1	0	0	0	0	0	289.771	0	0	1.9573	1
circSPAG9_4	0	0	1	0	0	0	0	0	251.067	0	0	0	-1.79518	1
circSPATA6	0	1	1	0	1	1	0	251.509	251.067	0	342.466	303.122	0.188789	1
circSPECC1	0	5	1	2	0	1	0	1257.55	251.067	579.542	0	303.122	-0.698964	0.815877
circSPEN_1	2	4	1	2	0	1	599.7	1006.04	251.067	579.542	0	303.122	-0.922222	0.345513
circSPEN_2	2	0	3	1	1	1	599.7	0	753.201	289.771	342.466	303.122	-0.467702	0.726803
circSPG21	2	0	0	2	0	1	599.7	0	0	579.542	0	303.122	0.631437	1
circSPICE1	2	0	1	0	1	1	599.7	0	251.067	0	342.466	303.122	-0.313927	1
circSPIDR	4	0	1	1	0	0	1199.4	0	251.067	289.771	0	0	-1.87955	0.392984
circSPPL3_1	0	1	0	1	0	1	0	251.509	0	289.771	0	303.122	0.964525	1
circSPPL3_2	0	3	1	1	2	2	0	754.527	251.067	289.771	684.932	606.244	0.503771	1
circSPRED1	0	1	0	0	0	0	0	251.509	0	0	0	0	-1.79524	1
circSREK1	1	1	0	0	0	0	299.85	251.509	0	0	0	0	-2.573	0.50033
circSRP54	2	0	0	0	0	0	599.7	0	0	0	0	0	-2.64132	0.57471
circSRPK1	2	3	3	2	4	3	599.7	754.527	753.201	579.542	1369.86	909.366	0.377396	0.62971
circSRPK2_1	0	1	0	0	0	0	0	251.509	0	0	0	0	-1.79524	1
circSRPK2_2	0	1	0	0	0	0	0	251.509	0	0	0	0	-1.79524	1
circSS18_1	2	2	1	0	0	0	599.7	503.018	251.067	0	0	0	-3.74149	0.0626375
circSS18_2	0	1	0	1	0	0	0	251.509	0	289.771	0	0	0.162475	1
circST13	0	0	0	1	0	0	0	0	0	289.771	0	0	1.9573	1
circST3GAL6	2	0	0	0	0	0	599.7	0	0	0	0	0	-2.64132	0.57471
circST7L_1	1	0	2	1	0	0	299.85	0	502.134	289.771	0	0	-1.11589	0.628838
circST7L_2	1	1	0	1	0	0	299.85	251.509	0	289.771	0	0	-0.613096	1
circST7L_3	0	0	1	0	1	1	0	0	251.067	0	342.466	303.122	0.964631	1
circSTAG1	1	0	0	0	1	1	299.85	0	0	0	342.466	303.122	0.964456	1
circSTAG2	0	2	0	0	1	0	0	503.018	0	0	342.466	0	-0.558606	1
circSTAU1	1	1	0	0	0	0	299.85	251.509	0	0	0	0	-2.573	0.50033
circSTAU2	0	0	1	1	3	1	0	0	251.067	289.771	1027.4	303.122	2.15864	0.230072
circSTK17A	0	1	0	0	1	1	0	251.509	0	0	342.466	303.122	0.964629	1
circSTK3	0	0	1	0	1	1	0	0	251.067	0	342.466	303.122	0.964631	1
circSTRN3_1	0	1	0	3	0	1	0	251.509	0	869.313	0	303.122	1.83617	0.443782
circSTRN3_2	0	3	0	2	1	3	0	754.527	0	579.542	342.466	909.366	1.12654	0.548439
circSTRN3_3	0	1	1	1	0	0	0	251.509	251.067	289.771	0	0	-0.612851	1
circSTT3B	0	0	9	1	1	0	0	0	2259.6	289.771	342.466	0	-1.69621	0.513321
circSTX8	0	0	1	0	0	0	0	0	251.067	0	0	0	-1.79518	1
circSTXBP3_1	0	0	0	2	0	0	0	0	0	579.542	0	0	2.72928	0.562025
circSTXBP3_2	1	29	29	20	9	13	299.85	7293.76	7280.94	5795.42	3082.19	3940.59	-0.21667	0.862313
circSUCO_1	0	0	0	1	0	1	0	0	0	289.771	0	303.122	2.76148	0.50011
circSUCO_2	1	4	1	2	3	0	299.85	1006.04	251.067	579.542	1027.4	0	-0.00877656	1
circSUGCT_1	0	0	1	2	0	1	0	0	251.067	579.542	0	303.122	1.47487	0.630264
circSUGCT_2	2	3	3	3	1	2	599.7	754.527	753.201	869.313	342.466	606.244	-0.181327	1
circSULF2	3	2	1	2	0	2	899.55	503.018	251.067	579.542	0	606.244	-0.335585	0.754177
circSUPT20H	1	1	3	1	0	0	299.85	251.509	753.201	289.771	0	0	-1.78144	0.219059
circSVIL	0	0	1	0	0	0	0	0	251.067	0	0	0	-1.79518	1
circSWT1_1	1	4	2	0	1	1	299.85	1006.04	502.134	0	342.466	303.122	-1.43401	0.289495
circSWT1_2	0	1	0	2	1	2	0	251.509	0	579.542	342.466	606.244	2.15281	0.219059
circSYDE2	0	0	0	1	0	1	0	0	0	289.771	0	303.122	2.76148	0.50011
circSYNCRIP_1	0	1	3	0	0	0	0	251.509	753.201	0	0	0	-3.42077	0.17378
circSYNCRIP_2	1	0	1	0	1	0	299.85	0	251.067	0	342.466	0	-0.612738	1
circSYNE2_1	0	0	0	1	0	1	0	0	0	289.771	0	303.122	2.76148	0.50011
circSYNE2_2	0	0	0	0	1	0	0	0	0	0	342.466	0	1.96574	1
circSYNRG	1	0	0	0	0	0	299.85	0	0	0	0	0	-1.80267	1
circTACC1	9	4	3	2	1	3	2698.65	1006.04	753.201	579.542	342.466	909.366	-1.18252	0.158766
circTAF4	3	1	1	1	1	2	899.55	251.509	251.067	289.771	342.466	606.244	-0.0905685	1
circTAF4B	0	0	0	5	1	4	0	0	0	1448.86	342.466	1212.49	4.89641	0.00271167
circTAOK1	1	1	0	1	1	2	299.85	251.509	0	289.771	342.466	606.244	1.07813	0.687706
circTAX1BP1_1	0	1	0	1	0	0	0	251.509	0	289.771	0	0	0.162475	1
circTAX1BP1_2	0	1	0	1	0	0	0	251.509	0	289.771	0	0	0.162475	1
circTAX1BP1_3	0	0	1	0	0	0	0	0	251.067	0	0	0	-1.79518	1
circTAX1BP1_4	0	0	2	0	1	1	0	0	502.134	0	342.466	303.122	0.202329	1
circTBC1D1	0	2	2	2	1	1	0	503.018	502.134	579.542	342.466	303.122	0.204905	1
circTBC1D12_1	3	0	1	0	0	0	899.55	0	251.067	0	0	0	-3.49609	0.197549
circTBC1D12_2	0	4	3	0	1	1	0	1006.04	753.201	0	342.466	303.122	-1.39582	0.369972
circTBC1D12_3	0	2	2	0	1	0	0	503.018	502.134	0	342.466	0	-1.48021	0.383912
circTBC1D22A_1	1	0	1	3	3	4	299.85	0	251.067	869.313	1027.4	1212.49	2.32947	0.0226456
circTBC1D22A_2	13	22	14	17	14	13	3898.05	5533.2	3514.94	4926.11	4794.52	3940.59	0.0683079	0.917868
circTBC1D22A_3	2	2	4	4	2	3	599.7	503.018	1004.27	1159.08	684.932	909.366	0.377189	0.62971
circTBC1D23	1	0	0	0	0	0	299.85	0	0	0	0	0	-1.80267	1
circTBC1D32_1	0	0	0	1	0	1	0	0	0	289.771	0	303.122	2.76148	0.50011
circTBC1D32_2	2	0	0	1	0	0	599.7	0	0	289.771	0	0	-0.70066	1
circTBC1D32_3	2	0	0	1	0	1	599.7	0	0	289.771	0	303.122	0.149073	1
circTBC1D5	0	0	1	0	3	0	0	0	251.067	0	1027.4	0	1.59596	0.770769
circTBC1D8_1	0	0	1	3	0	2	0	0	251.067	869.313	0	606.244	2.13885	0.271931
circTBC1D8_2	2	1	0	1	0	0	599.7	251.509	0	289.771	0	0	-1.12756	0.638694
circTBCD	2	5	0	0	1	1	599.7	1257.55	0	0	342.466	303.122	-1.41896	0.318912
circTC2N_1	3	1	1	0	0	0	899.55	251.509	251.067	0	0	0	-3.74961	0.070151
circTC2N_2	1	1	1	3	3	3	299.85	251.509	251.067	869.313	1027.4	909.366	1.68107	0.092746
circTC2N_3	1	0	0	0	0	0	299.85	0	0	0	0	0	-1.80267	1
circTCF12	0	1	1	1	0	1	0	251.509	251.067	289.771	0	303.122	0.188685	1
circTCP1	0	0	3	3	3	2	0	0	753.201	869.313	1027.4	606.244	1.51793	0.146528
circTDRD3_1	0	0	2	0	0	0	0	0	502.134	0	0	0	-2.54964	0.554077
circTDRD3_2	1	0	1	0	2	1	299.85	0	251.067	0	684.932	303.122	0.702472	1
circTECTA	0	2	0	3	0	0	0	503.018	0	869.313	0	0	0.679356	1
circTENT4A	2	1	0	0	1	1	599.7	251.509	0	0	342.466	303.122	-0.313933	1
circTESK2	0	0	0	0	1	1	0	0	0	0	342.466	303.122	2.76169	0.500328
circTET1_1	2	1	1	0	0	0	599.7	251.509	251.067	0	0	0	-3.44631	0.125165
circTET1_2	2	3	1	0	1	1	599.7	754.527	251.067	0	342.466	303.122	-1.22482	0.289495
circTEX10_1	0	2	2	0	0	0	0	503.018	502.134	0	0	0	-3.44343	0.128731
circTEX10_2	1	1	0	0	1	1	299.85	251.509	0	0	342.466	303.122	0.18868	1
circTEX9	0	1	0	0	0	0	0	251.509	0	0	0	0	-1.79524	1
circTFAP2A	0	0	1	0	0	0	0	0	251.067	0	0	0	-1.79518	1
circTFEB	1	0	0	0	0	0	299.85	0	0	0	0	0	-1.80267	1
circTFRC	0	2	0	0	0	0	0	503.018	0	0	0	0	-2.55037	0.554268
circTGFB2	0	2	0	1	1	2	0	503.018	0	289.771	342.466	606.244	1.07823	0.687706
circTGFBR1	0	0	0	1	0	1	0	0	0	289.771	0	303.122	2.76148	0.50011
circTGFBR3_1	0	0	0	1	0	1	0	0	0	289.771	0	303.122	2.76148	0.50011
circTGFBR3_2	1	0	1	0	0	0	299.85	0	251.067	0	0	0	-2.57299	0.50033
circTGFBR3_3	0	1	3	0	2	1	0	251.509	753.201	0	684.932	303.122	-0.124292	1
circTGFBR3_4	0	0	1	0	0	0	0	0	251.067	0	0	0	-1.79518	1
circTGFBRAP1	2	4	0	0	1	1	599.7	1006.04	0	0	342.466	303.122	-1.21923	0.373545
circTHOC2	0	2	0	1	1	0	0	503.018	0	289.771	342.466	0	0.198333	1
circTHUMPD3	0	2	4	0	0	0	0	503.018	1004.27	0	0	0	-3.94847	0.118998
circTIA1_1	1	1	0	0	0	0	299.85	251.509	0	0	0	0	-2.573	0.50033
circTIA1_2	0	0	1	0	0	0	0	0	251.067	0	0	0	-1.79518	1
circTIPRL	1	0	1	0	3	1	299.85	0	251.067	0	1027.4	303.122	1.1016	0.735073
circTLK1_1	0	0	0	1	1	1	0	0	0	289.771	342.466	303.122	3.27379	0.250165
circTLK1_2	3	0	3	4	0	3	899.55	0	753.201	1159.08	0	909.366	0.355311	1
circTLK1_3	0	2	0	0	1	0	0	503.018	0	0	342.466	0	-0.558606	1
circTLK2_1	0	1	1	1	2	2	0	251.509	251.067	289.771	684.932	606.244	1.37707	0.453486
circTLK2_2	3	10	7	4	11	9	899.55	2515.09	1757.47	1159.08	3767.12	2728.1	0.51564	0.44989
circTM9SF3	0	0	0	2	0	1	0	0	0	579.542	0	303.122	3.27024	0.256414
circTMEM120B	1	0	1	0	0	0	299.85	0	251.067	0	0	0	-2.57299	0.50033
circTMEM127	0	2	0	1	0	1	0	503.018	0	289.771	0	303.122	0.189613	1
circTMEM131	0	0	2	0	0	0	0	0	502.134	0	0	0	-2.54964	0.554077
circTMEM135	0	0	1	0	1	0	0	0	251.067	0	342.466	0	0.170268	1
circTMEM237	1	2	0	0	0	0	299.85	503.018	0	0	0	0	-3.07499	0.254278
circTMEM245	0	0	1	1	0	1	0	0	251.067	289.771	0	303.122	0.964526	1
circTMEM39A	0	0	2	0	0	0	0	0	502.134	0	0	0	-2.54964	0.554077
circTMEM43	0	0	0	2	0	1	0	0	0	579.542	0	303.122	3.27024	0.256414
circTMEM50B	0	0	1	0	0	0	0	0	251.067	0	0	0	-1.79518	1
circTMEM56_1	4	0	0	2	0	0	1199.4	0	0	579.542	0	0	-0.879411	0.866577
circTMEM56_2	0	0	1	0	0	0	0	0	251.067	0	0	0	-1.79518	1
circTMEM65	1	0	1	1	0	1	299.85	0	251.067	289.771	0	303.122	0.188577	1
circTMOD3	0	0	0	0	1	0	0	0	0	0	342.466	0	1.96574	1
circTMTC3	0	0	0	1	1	1	0	0	0	289.771	342.466	303.122	3.27379	0.250165
circTNFRSF21_1	0	0	0	0	1	1	0	0	0	0	342.466	303.122	2.76169	0.500328
circTNFRSF21_2	0	0	3	1	0	0	0	0	753.201	289.771	0	0	-1.10003	0.750389
circTNS3_1	0	0	1	0	0	0	0	0	251.067	0	0	0	-1.79518	1
circTNS3_2	0	0	1	0	0	0	0	0	251.067	0	0	0	-1.79518	1
circTOGARAM1	0	1	0	0	1	0	0	251.509	0	0	342.466	0	0.170193	1
circTOP1	0	1	1	2	0	1	0	251.509	251.067	579.542	0	303.122	0.700887	1
circTRAF3IP1	2	2	0	0	0	0	599.7	503.018	0	0	0	0	-3.45031	0.133087
circTRAM1	0	0	3	0	0	0	0	0	753.201	0	0	0	-3.029	0.419947
circTRAPPC10_1	0	0	0	0	1	1	0	0	0	0	342.466	303.122	2.76169	0.500328
circTRAPPC10_2	0	0	0	0	1	0	0	0	0	0	342.466	0	1.96574	1
circTRAPPC10_3	0	0	1	0	0	0	0	0	251.067	0	0	0	-1.79518	1
circTRAPPC11	1	0	0	0	1	0	299.85	0	0	0	342.466	0	0.161666	1
circTRAPPC8	1	1	0	0	0	0	299.85	251.509	0	0	0	0	-2.573	0.50033
circTRAPPC9	2	4	1	0	0	0	599.7	1006.04	251.067	0	0	0	-4.19567	0.0161989
circTRDMT1	0	1	1	0	3	1	0	251.509	251.067	0	1027.4	303.122	1.12521	0.73443
circTRIM2	0	0	0	0	1	0	0	0	0	0	342.466	0	1.96574	1
circTRIM33	0	2	2	2	0	1	0	503.018	502.134	579.542	0	303.122	-0.172047	1
circTRIP11	0	0	0	1	0	1	0	0	0	289.771	0	303.122	2.76148	0.50011
circTRIP12_1	0	0	3	1	0	1	0	0	753.201	289.771	0	303.122	-0.30152	1
circTRIP12_2	0	3	0	1	1	1	0	754.527	0	289.771	342.466	303.122	0.213241	1
circTRMT11	2	0	0	0	0	0	599.7	0	0	0	0	0	-2.64132	0.57471
circTRPM7_1	14	31	20	12	12	10	4197.9	7796.78	5021.34	3477.25	4109.59	3031.22	-0.69711	0.0537349
circTRPM7_2	2	2	1	2	0	0	599.7	503.018	251.067	579.542	0	0	-0.980041	0.453486
circTRPM7_3	0	0	0	1	0	1	0	0	0	289.771	0	303.122	2.76148	0.50011
circTRPM7_4	0	0	0	1	0	1	0	0	0	289.771	0	303.122	2.76148	0.50011
circTRPM7_5	0	0	2	0	0	0	0	0	502.134	0	0	0	-2.54964	0.554077
circTRPM7_6	3	1	0	1	0	1	899.55	251.509	0	289.771	0	303.122	-0.728235	0.728384
circTRPM7_7	0	0	1	0	1	1	0	0	251.067	0	342.466	303.122	0.964631	1
circTRPS1_1	0	0	1	2	0	1	0	0	251.067	579.542	0	303.122	1.47487	0.630264
circTRPS1_2	0	0	1	2	0	0	0	0	251.067	579.542	0	0	0.948413	1
circTRPS1_3	0	1	0	0	0	0	0	251.509	0	0	0	0	-1.79524	1
circTTC13	2	4	0	0	0	0	599.7	1006.04	0	0	0	0	-3.99165	0.0777483
circTTC17	2	0	0	0	0	0	599.7	0	0	0	0	0	-2.64132	0.57471
circTTC21B	0	1	0	0	0	0	0	251.509	0	0	0	0	-1.79524	1
circTTC3_1	4	6	9	10	8	8	1199.4	1509.05	2259.6	2897.71	2739.73	2424.98	0.665357	0.137084
circTTC3_2	3	3	3	2	4	2	899.55	754.527	753.201	579.542	1369.86	606.244	0.0518692	1
circTTC3_3	0	1	0	0	0	0	0	251.509	0	0	0	0	-1.79524	1
circTTC4	0	0	0	0	1	0	0	0	0	0	342.466	0	1.96574	1
circTTL	0	0	0	0	1	1	0	0	0	0	342.466	303.122	2.76169	0.500328
circTTLL5	0	1	0	0	1	1	0	251.509	0	0	342.466	303.122	0.964629	1
circTUT7	1	1	3	0	0	0	299.85	251.509	753.201	0	0	0	-3.74138	0.0626375
circTXN2	0	4	9	0	0	0	0	1006.04	2259.6	0	0	0	-4.98736	0.0493711
circTXNDC16_1	3	0	1	0	0	0	899.55	0	251.067	0	0	0	-3.49609	0.197549
circTXNDC16_2	1	0	0	0	0	0	299.85	0	0	0	0	0	-1.80267	1
circUBA2	0	0	1	0	0	0	0	0	251.067	0	0	0	-1.79518	1
circUBAP1	0	1	0	1	0	1	0	251.509	0	289.771	0	303.122	0.964525	1
circUBAP2_1	0	0	0	1	2	2	0	0	0	289.771	684.932	606.244	3.94987	0.0626375
circUBAP2_2	0	1	2	1	2	3	0	251.509	502.134	289.771	684.932	909.366	1.1227	0.508245
circUBAP2_3	0	2	2	2	0	1	0	503.018	502.134	579.542	0	303.122	-0.172047	1
circUBAP2L	2	0	0	1	0	1	599.7	0	0	289.771	0	303.122	0.149073	1
circUBE2D1	0	0	2	0	0	0	0	0	502.134	0	0	0	-2.54964	0.554077
circUBE2D2	0	1	2	1	1	1	0	251.509	502.134	289.771	342.466	303.122	0.199238	1
circUBE2J2	0	0	4	1	0	0	0	0	1004.27	289.771	0	0	-1.467	0.630422
circUBE2K_1	1	0	1	0	0	0	299.85	0	251.067	0	0	0	-2.57299	0.50033
circUBE2K_2	1	0	2	0	1	0	299.85	0	502.134	0	342.466	0	-1.11281	0.630888
circUBE3A	6	11	12	6	3	4	1799.1	2766.6	3012.8	1738.63	1027.4	1212.49	-0.915477	0.0607277
circUBE3B	0	1	0	1	0	1	0	251.509	0	289.771	0	303.122	0.964525	1
circUBE3C	0	0	0	0	1	1	0	0	0	0	342.466	303.122	2.76169	0.500328
circUBE4B	2	0	0	1	0	0	599.7	0	0	289.771	0	0	-0.70066	1
circUBR2	0	2	0	0	0	0	0	503.018	0	0	0	0	-2.55037	0.554268
circUBR3	3	1	1	2	1	0	899.55	251.509	251.067	579.542	342.466	0	-0.474671	0.735945
circUBR5_1	1	1	1	0	0	0	299.85	251.509	251.067	0	0	0	-3.07466	0.250165
circUBR5_2	0	0	6	0	0	0	0	0	1506.4	0	0	0	-3.92092	0.353996
circUBR7	0	0	2	4	0	3	0	0	502.134	1159.08	0	909.366	1.81731	0.378505
circUCHL3	0	0	0	2	0	0	0	0	0	579.542	0	0	2.72928	0.562025
circUCK2	0	2	2	3	0	3	0	503.018	502.134	869.313	0	909.366	0.748776	0.575876
circUGGT1_1	0	0	0	2	0	1	0	0	0	579.542	0	303.122	3.27024	0.256414
circUGGT1_2	0	1	0	2	0	1	0	251.509	0	579.542	0	303.122	1.47483	0.630275
circUGGT1_3	0	0	1	0	0	0	0	0	251.067	0	0	0	-1.79518	1
circUGP2	2	0	0	1	0	0	599.7	0	0	289.771	0	0	-0.70066	1
circUHRF1BP1L	0	0	0	0	1	1	0	0	0	0	342.466	303.122	2.76169	0.500328
circUIMC1	0	0	2	0	0	0	0	0	502.134	0	0	0	-2.54964	0.554077
circULK2	0	1	0	0	1	1	0	251.509	0	0	342.466	303.122	0.964629	1
circULK4_1	0	0	0	0	1	1	0	0	0	0	342.466	303.122	2.76169	0.500328
circULK4_2	0	0	1	0	0	0	0	0	251.067	0	0	0	-1.79518	1
circUNC13B	0	0	2	0	0	0	0	0	502.134	0	0	0	-2.54964	0.554077
circUNKL	0	0	2	0	1	1	0	0	502.134	0	342.466	303.122	0.202329	1
circUPF2_1	3	7	3	5	6	9	899.55	1760.56	753.201	1448.86	2054.79	2728.1	0.82619	0.16428
circUPF2_2	1	2	4	2	0	1	299.85	503.018	1004.27	579.542	0	303.122	-0.921908	0.508245
circUSO1	2	1	0	0	0	0	599.7	251.509	0	0	0	0	-3.08454	0.264807
circUSP10	0	0	2	0	0	0	0	0	502.134	0	0	0	-2.54964	0.554077
circUSP24_1	2	1	0	0	0	0	599.7	251.509	0	0	0	0	-3.08454	0.264807
circUSP24_2	0	3	3	1	2	2	0	754.527	753.201	289.771	684.932	606.244	-0.0363174	1
circUSP24_3	0	1	0	0	0	0	0	251.509	0	0	0	0	-1.79524	1
circUSP3_1	0	1	2	2	2	2	0	251.509	502.134	579.542	684.932	606.244	1.12267	0.508245
circUSP3_2	0	0	0	0	1	0	0	0	0	0	342.466	0	1.96574	1
circUSP3_3	0	1	1	1	1	0	0	251.509	251.067	289.771	342.466	0	0.188759	1
circUSP34	1	0	1	0	0	0	299.85	0	251.067	0	0	0	-2.57299	0.50033
circUSP37	0	0	1	1	0	0	0	0	251.067	289.771	0	0	0.162537	1
circUSP4	1	1	4	0	3	2	299.85	251.509	1004.27	0	1027.4	606.244	0.000912675	1
circUSP40	0	0	0	1	0	1	0	0	0	289.771	0	303.122	2.76148	0.50011
circUSP47_1	2	1	1	0	1	0	599.7	251.509	251.067	0	342.466	0	-1.48626	0.375275
circUSP47_2	0	0	0	1	0	1	0	0	0	289.771	0	303.122	2.76148	0.50011
circUSP54	2	0	1	1	1	0	599.7	0	251.067	289.771	342.466	0	-0.314197	1
circUSP7	3	0	1	3	1	3	899.55	0	251.067	869.313	342.466	909.366	0.957723	0.556236
circUSP8	0	0	0	2	3	2	0	0	0	579.542	1027.4	606.244	4.40839	0.0156973
circUTP18	0	1	0	0	0	0	0	251.509	0	0	0	0	-1.79524	1
circUTRN	0	1	1	0	1	1	0	251.509	251.067	0	342.466	303.122	0.188789	1
circUXS1	2	1	0	0	1	1	599.7	251.509	0	0	342.466	303.122	-0.313933	1
circVAPA	1	3	0	1	1	1	299.85	754.527	0	289.771	342.466	303.122	-0.172419	1
circVASH2	0	2	1	3	1	0	0	503.018	251.067	869.313	342.466	0	0.582993	1
circVAV1	0	0	1	0	0	0	0	0	251.067	0	0	0	-1.79518	1
circVAV2	1	0	0	0	1	0	299.85	0	0	0	342.466	0	0.161666	1
circVCAN	0	2	0	0	0	0	0	503.018	0	0	0	0	-2.55037	0.554268
circVDR	1	1	0	0	0	0	299.85	251.509	0	0	0	0	-2.573	0.50033
circVPS13B	1	0	0	0	2	1	299.85	0	0	0	684.932	303.122	1.47994	0.644328
circVPS33B	0	0	1	0	2	1	0	0	251.067	0	684.932	303.122	1.49045	0.641416
circVPS35_1	2	2	0	0	0	0	599.7	503.018	0	0	0	0	-3.45031	0.133087
circVPS35_2	0	1	0	0	4	2	0	251.509	0	0	1369.86	606.244	2.4649	0.202627
circVPS35_3	2	0	0	0	0	0	599.7	0	0	0	0	0	-2.64132	0.57471
circVPS35_4	0	2	0	0	0	0	0	503.018	0	0	0	0	-2.55037	0.554268
circVPS35_5	0	1	0	1	0	0	0	251.509	0	289.771	0	0	0.162475	1
circVPS50_6	3	0	4	2	1	2	899.55	0	1004.27	579.542	342.466	606.244	-0.249023	0.781024
circVWA8	1	0	0	1	0	0	299.85	0	0	289.771	0	0	0.154837	1
circWAPL	1	2	0	0	3	0	299.85	503.018	0	0	1027.4	0	0.272174	1
circWASF3	0	0	1	1	0	0	0	0	251.067	289.771	0	0	0.162537	1
circWASHC4	1	0	2	0	0	0	299.85	0	502.134	0	0	0	-3.07493	0.254232
circWASHC5	0	0	2	0	0	0	0	0	502.134	0	0	0	-2.54964	0.554077
circWBP4	1	0	1	0	2	1	299.85	0	251.067	0	684.932	303.122	0.702472	1
circWDFY2	0	0	0	0	1	0	0	0	0	0	342.466	0	1.96574	1
circWDFY3	0	0	2	0	0	0	0	0	502.134	0	0	0	-2.54964	0.554077
circWDR27	0	0	1	1	0	0	0	0	251.067	289.771	0	0	0.162537	1
circWDR33	5	7	7	2	0	2	1499.25	1760.56	1757.47	579.542	0	606.244	-1.93469	0.00443382
circWDR36	0	1	1	0	1	1	0	251.509	251.067	0	342.466	303.122	0.188789	1
circWDR37_1	2	3	1	0	0	0	599.7	754.527	251.067	0	0	0	-3.98641	0.0313532
circWDR37_2	5	0	0	2	0	0	1499.25	0	0	579.542	0	0	-1.18478	0.779072
circWDR37_3	0	0	1	0	1	1	0	0	251.067	0	342.466	303.122	0.964631	1
circWDR48	0	0	2	0	2	0	0	0	502.134	0	684.932	0	0.308237	1
circWDR7_1	2	2	4	0	2	1	599.7	503.018	1004.27	0	684.932	303.122	-1.10455	0.344291
circWDR7_2	0	0	1	0	0	0	0	0	251.067	0	0	0	-1.79518	1
circWDR75_1	1	1	1	1	0	0	299.85	251.509	251.067	289.771	0	0	-1.11471	0.625165
circWDR75_2	1	0	2	0	2	2	299.85	0	502.134	0	684.932	606.244	0.58077	1
circWIPI2	1	0	0	0	0	0	299.85	0	0	0	0	0	-1.80267	1
circWNK1	3	2	1	0	1	1	899.55	503.018	251.067	0	342.466	303.122	-1.22493	0.289495
circWWOX	0	1	1	2	3	3	0	251.509	251.067	579.542	1027.4	909.366	2.01971	0.0657488
circWWP1_1	0	0	0	3	1	1	0	0	0	869.313	342.466	303.122	3.94974	0.0626375
circWWP1_2	2	0	0	0	0	0	599.7	0	0	0	0	0	-2.64132	0.57471
circWWP1_3	0	0	0	1	0	0	0	0	0	289.771	0	0	1.9573	1
circXDH_1	1	3	0	0	0	0	299.85	754.527	0	0	0	0	-3.44303	0.166799
circXDH_2	2	1	1	0	1	0	599.7	251.509	251.067	0	342.466	0	-1.48626	0.375275
circXPC	0	1	0	0	0	0	0	251.509	0	0	0	0	-1.79524	1
circXPO4	14	13	19	13	15	12	4197.9	3269.62	4770.27	3767.02	5136.99	3637.47	0.0223529	1
circXPO6	0	1	2	0	0	0	0	251.509	502.134	0	0	0	-3.07143	0.255717
circXPOT_1	1	3	1	1	0	1	299.85	754.527	251.067	289.771	0	303.122	-0.979903	0.453486
circXPOT_2	0	0	1	0	1	0	0	0	251.067	0	342.466	0	0.170268	1
circXRN2	0	1	1	0	0	0	0	251.509	251.067	0	0	0	-2.57269	0.500296
circYAP1	3	1	0	0	0	0	899.55	251.509	0	0	0	0	-3.49632	0.197441
circYEATS2	0	1	1	0	1	1	0	251.509	251.067	0	342.466	303.122	0.188789	1
circYES1	0	0	0	0	1	1	0	0	0	0	342.466	303.122	2.76169	0.500328
circYIPF5	0	0	2	0	2	2	0	0	502.134	0	684.932	606.244	1.12021	0.749453
circYME1L1	0	1	0	1	0	1	0	251.509	0	289.771	0	303.122	0.964525	1
circYTHDC2	0	0	0	0	1	1	0	0	0	0	342.466	303.122	2.76169	0.500328
circYTHDF3	0	0	1	0	0	0	0	0	251.067	0	0	0	-1.79518	1
circZBTB44	0	0	1	1	0	1	0	0	251.067	289.771	0	303.122	0.964526	1
circZC3H14	2	1	1	0	0	0	599.7	251.509	251.067	0	0	0	-3.44631	0.125165
circZC3H15	0	0	2	0	0	0	0	0	502.134	0	0	0	-2.54964	0.554077
circZC3H18_1	0	0	3	0	0	0	0	0	753.201	0	0	0	-3.029	0.419947
circZC3H18_2	1	0	1	0	3	2	299.85	0	251.067	0	1027.4	606.244	1.39221	0.364088
circZC3H6_1	0	1	2	0	0	0	0	251.509	502.134	0	0	0	-3.07143	0.255717
circZC3H6_2	4	0	3	5	1	2	1199.4	0	753.201	1448.86	342.466	606.244	0.344792	1
circZC3H7A_1	9	4	1	2	4	3	2698.65	1006.04	251.067	579.542	1369.86	909.366	-0.43813	0.701363
circZC3H7A_2	1	0	0	0	0	0	299.85	0	0	0	0	0	-1.80267	1
circZCCHC7	0	0	0	1	0	0	0	0	0	289.771	0	0	1.9573	1
circZDHHC20_1	0	0	0	0	1	1	0	0	0	0	342.466	303.122	2.76169	0.500328
circZDHHC20_2	0	2	1	1	0	1	0	503.018	251.067	289.771	0	303.122	-0.313069	1
circZDHHC7	2	3	6	6	5	6	599.7	754.527	1506.4	1738.63	1712.33	1818.73	0.82915	0.186286
circZFAND3	0	1	0	0	0	0	0	251.509	0	0	0	0	-1.79524	1
circZFC3H1_1	0	1	0	0	2	1	0	251.509	0	0	684.932	303.122	1.49036	0.641437
circZFC3H1_2	0	2	0	2	0	2	0	503.018	0	579.542	0	606.244	1.07221	0.732257
circZFC3H1_3	3	4	0	3	2	2	899.55	1006.04	0	869.313	684.932	606.244	0.212476	1
circZFC3H1_4	2	0	1	1	2	1	599.7	0	251.067	289.771	684.932	303.122	0.57634	1
circZFR	0	0	0	1	0	0	0	0	0	289.771	0	0	1.9573	1
circZFX	0	3	6	2	0	0	0	754.527	1506.4	579.542	0	0	-1.75964	0.372953
circZFYVE26	0	1	0	3	0	2	0	251.509	0	869.313	0	606.244	2.13864	0.271972
circZHX1	2	0	0	1	1	0	599.7	0	0	289.771	342.466	0	0.161237	1
circZKSCAN1	0	0	1	1	1	0	0	0	251.067	289.771	342.466	0	0.964601	1
circZMYM2_1	0	0	0	1	1	1	0	0	0	289.771	342.466	303.122	3.27379	0.250165
circZMYM2_2	1	1	1	0	0	0	299.85	251.509	251.067	0	0	0	-3.07466	0.250165
circZMYM2_3	1	0	1	1	1	2	299.85	0	251.067	289.771	342.466	606.244	1.07813	0.687706
circZMYM2_4	1	0	1	2	0	0	299.85	0	251.067	579.542	0	0	0.166932	1
circZMYM4_1	0	0	0	0	1	1	0	0	0	0	342.466	303.122	2.76169	0.500328
circZMYM4_2	1	2	0	0	1	1	299.85	503.018	0	0	342.466	303.122	-0.313074	1
circZMYM4_3	1	2	2	1	2	2	299.85	503.018	502.134	289.771	684.932	606.244	0.208486	1
circZMYM4_4	0	6	2	3	2	3	0	1509.05	502.134	869.313	684.932	909.366	0.238334	0.847215
circZMYM5	1	0	1	0	0	0	299.85	0	251.067	0	0	0	-2.57299	0.50033
circZMYND11_1	2	3	6	7	10	5	599.7	754.527	1506.4	2028.4	3424.66	1515.61	1.2032	0.0386237
circZMYND11_2	1	1	1	1	2	2	299.85	251.509	251.067	289.771	684.932	606.244	0.875211	0.726803
circZNF143	0	1	1	1	0	0	0	251.509	251.067	289.771	0	0	-0.612851	1
circZNF148_1	0	0	2	1	2	2	0	0	502.134	289.771	684.932	606.244	1.37707	0.453486
circZNF148_2	0	3	0	1	2	1	0	754.527	0	289.771	684.932	303.122	0.602732	1
circZNF207	0	0	0	0	1	1	0	0	0	0	342.466	303.122	2.76169	0.500328
circZNF236_1	0	2	1	0	0	0	0	503.018	251.067	0	0	0	-3.07143	0.255788
circZNF236_2	1	1	4	2	1	3	299.85	251.509	1004.27	579.542	342.466	909.366	0.21085	1
circZNF292	0	3	4	3	5	4	0	754.527	1004.27	869.313	1712.33	1212.49	0.961985	0.167956
circZNF37A	0	1	0	2	0	2	0	251.509	0	579.542	0	606.244	1.8516	0.384433
circZNF395	0	0	1	0	0	0	0	0	251.067	0	0	0	-1.79518	1
circZNF532_1	11	7	5	6	2	4	3298.35	1760.56	1255.34	1738.63	684.932	1212.49	-0.72115	0.250262
circZNF532_2	1	0	3	0	0	0	299.85	0	753.201	0	0	0	-3.44245	0.166595
circZNF532_3	0	0	1	0	0	0	0	0	251.067	0	0	0	-1.79518	1
circZNF566	0	0	0	1	1	1	0	0	0	289.771	342.466	303.122	3.27379	0.250165
circZNF568	0	1	0	0	0	0	0	251.509	0	0	0	0	-1.79524	1
circZNF609	0	0	2	1	0	1	0	0	502.134	289.771	0	303.122	0.189838	1
circZNF644_1	4	0	3	9	1	6	1199.4	0	753.201	2607.94	342.466	1818.73	1.28806	0.296165
circZNF644_2	0	1	0	1	0	0	0	251.509	0	289.771	0	0	0.162475	1
circZNF644_3	0	0	1	0	0	0	0	0	251.067	0	0	0	-1.79518	1
circZNF654	1	0	0	3	2	4	299.85	0	0	869.313	684.932	1212.49	2.95859	0.0216199
circZNF713	0	4	1	1	0	1	0	1006.04	251.067	289.771	0	303.122	-0.962164	0.746065
circZNF827	4	1	0	2	0	1	1199.4	251.509	0	579.542	0	303.122	-0.56671	0.810166
circZNFX1	4	3	0	1	0	1	1199.4	754.527	0	289.771	0	303.122	-1.48023	0.291927
circZRANB1	0	0	2	0	0	0	0	0	502.134	0	0	0	-2.54964	0.554077
circZSWIM6_1	0	1	1	0	0	0	0	251.509	251.067	0	0	0	-2.57269	0.500296
circZSWIM6_2	1	0	0	0	0	0	299.85	0	0	0	0	0	-1.80267	1
circZZZ3_1	0	0	0	0	3	2	0	0	0	0	1027.4	606.244	3.98262	0.113764
circZZZ3_2	0	0	1	0	2	2	0	0	251.067	0	684.932	606.244	1.86514	0.399682
circZZZ3_3	0	0	3	0	0	0	0	0	753.201	0	0	0	-3.029	0.419947
Note: logFC, log(fold change)

## Sheet: Sheet3
				1	circAASDH	0.130242	141	1	1
				2	circABCA1	1	1088	1	1
				3	circABCA13	1	1040	1	1
				4	circABCA6	1	1089	1	1
				5	circABL2	0.50011	514	1	1
				6	circABLIM2	0.641416	864	1	1
				7	circACACA_1	0.50011	515	1	1
				8	circACACA_2	0.50033	672	1	1
				9	circACACA_3	1	1090	1	1
				10	circACACA_4	0.699917	908	1	1
				11	circACACA_5	1	1091	1	1
				12	circACADM	1	1092	1	1
				13	circACAP2	1	1093	1	1
				14	circACAT1	0.419947	452	1	1
				15	circACBD5	0.375275	406	1	1
				16	circACSL3_1	0.197441	209	1	1
				17	circACSL3_2	0.29386	366	1	1
				18	circACSL3_3	0.373524	404	1	1
				19	circACSL3_4	1	1094	1	1
				20	circACSL3_5	1	1095	1	1
				21	circACSL6_1	0.234773	248	1	1
				22	circACSL6_2	0.50011	516	1	1
				23	circACSL6_3	0.57471	780	1	1
				24	circACSL6_4	1	1096	1	1
				25	circACSS3_1	0.142512	156	1	1
				26	circACSS3_2	0.364287	396	1	1
				27	circACSS3_3	0.448697	478	1	1
				28	circACSS3_4	1	1097	1	1
				29	circACTR3B_1	0.500328	591	1	1
				30	circACTR3B_2	1	1098	1	1
				31	circACVR1	1	1099	1	1
				32	circACVR2A	0.254232	271	1	1
				33	circADAM17_1	1	1100	1	1
				34	circADAM17_2	1	1101	1	1
				35	circADAMTS12	1	1102	1	1
				36	circADAMTS9	1	1103	1	1
				37	circADAT1_1	1	1104	1	1
				38	circADCY1_2	0.0313532	35	1	1
				39	circADCY1_3	0.103175	103	1	1
				40	circADCY1_4	0.554077	717	1	1
				41	circADCY1_5	1	1105	1	1
				42	circADGRA3	1	1106	1	1
				43	circADGRG6_1	1	1107	1	1
				44	circADGRG6_2	1	1108	1	1
				45	circADGRG6_3	1	1109	1	1
				46	circADPRM	1	1110	1	1
				47	circAFDN_1	0.067224	68	1	1
				48	circAFDN_2	0.500296	565	1	1
				49	circAFDN_3	0.736861	932	1	1
				50	circAFF2	0.443782	474	1	1
				51	circAFG1L	0.500328	592	1	1
				52	circAFTPH	0.254278	283	1	1
				53	circAGAP1_1	0.0392483	46	1	1
				54	circAGAP1_2	1	1111	1	1
				55	circAGBL2	0.289495	352	1	1
				56	circAGK	0.448697	479	1	1
				57	circAGL_1	0.419947	453	1	1
				58	circAGL_2	0.625165	828	1	1
				59	circAGO3	1	1112	1	1
				60	circAKAP10	0.554077	718	1	1
				61	circAKAP11	1	1113	1	1
				62	circAKAP6	0.113764	109	1	1
				63	circALCAM	0.50033	651	1	1
				64	circALDH7A1	0.500299	584	1	1
				65	circALMS1_1	0.125289	133	1	1
				66	circALMS1_2	1	1114	1	1
				67	circAMBRA1_1	0.133067	147	1	1
				68	circAMBRA1_2	1	1115	1	1
				69	circAMBRA1_3	1	1116	1	1
				70	circAMDHD1	0.50011	517	1	1
				71	circAMN1	0.754177	947	1	1
				72	circAMOTL1	0.219059	231	1	1
				73	circANAPC1	0.50033	673	1	1
				74	circANKFY1	0.227129	244	1	1
				75	circANKHD1	0.554268	750	1	1
				76	circANKIB1	0.50011	518	1	1
				77	circANKRD12_1	1	1117	1	1
				78	circANKRD12_2	1	1118	1	1
				79	circANKRD13C	0.50033	674	1	1
				80	circANKRD17	0.146528	166	1	1
				81	circANKRD42_1	0.230072	245	1	1
				82	circANKRD42_2	1	1041	1	1
				83	circANKRD44	0.500328	593	1	1
				84	circANTXR2	1	1119	1	1
				85	circANXA4	0.554077	719	1	1
				86	circAP1G1	1	1120	1	1
				87	circAP2A1	0.813151	978	1	1
				88	circAP2A2	1	1121	1	1
				89	circAPC	1	1122	1	1
				90	circAPLP2	0.50011	519	1	1
				91	circAQR	1	1123	1	1
				92	circARAP1	0.44922	487	1	1
				93	circARCN1_1	0.57471	781	1	1
				94	circARCN1_2	1	1124	1	1
				95	circARFGAP3_1	0.00197252	5	0.681702	0.681702
				96	circARFGAP3_2	0.57471	782	1	1
				97	circARFGAP3_3	1	1125	1	1
				98	circARFGAP3_4	1	1126	1	1
				99	circARFGEF1	1	1127	1	1
				100	circARFIP1	1	1010	1	1
				101	circARHGAP1	1	1128	1	1
				102	circARHGAP10_1	0.256414	303	1	1
				103	circARHGAP10_2	0.344291	377	1	1
				104	circARHGAP10_3	1	1129	1	1
				105	circARHGAP10_4	1	1130	1	1
				106	circARHGAP10_5	1	1131	1	1
				107	circARHGAP12_1	0.453486	490	1	1
				108	circARHGAP12_2	0.500328	594	1	1
				109	circARHGAP12_3	1	1031	1	1
				110	circARHGAP12_4	1	1042	1	1
				111	circARHGAP18_1	0.0905086	91	1	1
				112	circARHGAP18_2	1	1132	1	1
				113	circARHGAP21	1	1133	1	1
				114	circARHGAP26	1	1134	1	1
				115	circARHGAP29_1	0.141707	154	1	1
				116	circARHGAP29_2	0.392699	437	1	1
				117	circARHGAP29_3	0.641437	871	1	1
				118	circARHGAP5_1	0.210919	226	1	1
				119	circARHGAP5_2	0.767777	955	1	1
				120	circARHGAP5_3	1	1135	1	1
				121	circARHGEF10	1	1136	1	1
				122	circARHGEF28	0.500328	595	1	1
				123	circARHGEF38	0.554077	720	1	1
				124	circARHGEF40	0.630595	852	1	1
				125	circARHGEF6	0.0078607	17	0.799017	0.799017
				126	circARID1A_1	0.256414	304	1	1
				127	circARID1A_2	0.50011	520	1	1
				128	circARID1B	1	1137	1	1
				129	circARID4A	1	1138	1	1
				130	circARID4B_1	0.453486	491	1	1
				131	circARID4B_2	0.500328	596	1	1
				132	circARIH1_1	0.687706	885	1	1
				133	circARIH1_2	1	1139	1	1
				134	circARIH2	0.79857	971	1	1
				135	circARL1	1	1032	1	1
				136	circARL2BP	0.307726	372	1	1
				137	circARMH3	0.264853	323	1	1
				138	circARSB	0.50011	521	1	1
				139	circASAH1	0.269272	335	1	1
				140	circASAP1	0.76664	954	1	1
				141	circASAP2_1	0.256414	305	1	1
				142	circASAP2_2	0.554077	721	1	1
				143	circASAP2_3	1	1140	1	1
				144	circASAP2_4	1	1141	1	1
				145	circASCC3	0.50033	675	1	1
				146	circASH1L_1	0.092746	96	1	1
				147	circASH1L_2	0.566062	779	1	1
				148	circASH1L_3	1	1142	1	1
				149	circATAD2	0.500328	597	1	1
				150	circATAD2B_1	0.687706	886	1	1
				151	circATAD2B_2	1	1143	1	1
				152	circATAD2B_3	1	1144	1	1
				153	circATAD2B_4	1	1145	1	1
				154	circATE1_1	0.070151	69	1	1
				155	circATE1_2	1	1146	1	1
				156	circATF6	0.50011	522	1	1
				157	circATF7IP	0.814759	980	1	1
				158	circATG10	1	1147	1	1
				159	circATG2B_1	0.174117	188	1	1
				160	circATG2B_2	0.250165	251	1	1
				161	circATL3	0.664362	881	1	1
				162	circATM	0.197441	210	1	1
				163	circATP10D	1	1148	1	1
				164	circATP11A_1	0.349411	384	1	1
				165	circATP11A_2	1	1149	1	1
				166	circATP11B_1	1	1150	1	1
				167	circATP11B_2	1	1151	1	1
				168	circATP11C	0.0156973	22	1	1
				169	circATP13A3_1	0.500328	598	1	1
				170	circATP13A3_2	0.57471	783	1	1
				171	circATP13A4_1	0.500328	599	1	1
				172	circATP13A4_2	0.57471	784	1	1
				173	circATP2C1	0.50011	523	1	1
				174	circATP6V0A2	1	1152	1	1
				175	circATP6V1C1	0.642505	878	1	1
				176	circATP8B1	0.50033	676	1	1
				177	circATP8B4	1	1043	1	1
				178	circATP9A	0.18012	194	1	1
				179	circATPAF2	0.50033	677	1	1
				180	circATRNL1	0.50033	678	1	1
				181	circATRX_1	0.256414	306	1	1
				182	circATRX_2	1	1153	1	1
				183	circATXN10	0.687706	887	1	1
				184	circATXN2L	0.215929	228	1	1
				185	circAVL9_1	0.50011	524	1	1
				186	circAVL9_2	0.50033	652	1	1
				187	circAVL9_3	0.842222	984	1	1
				188	circAZIN1_1	0.201279	218	1	1
				189	circAZIN1_2	1	1011	1	1
				190	circBABAM2	1	1154	1	1
				191	circBAG1	0.687706	888	1	1
				192	circBAZ2B_1	0.125165	121	1	1
				193	circBAZ2B_2	0.305364	370	1	1
				194	circBAZ2B_3	0.500296	566	1	1
				195	circBAZ2B_4	1	1044	1	1
				196	circBAZ2B_5	1	1155	1	1
				197	circBAZ2B_6	1	1156	1	1
				198	circBAZ2B_7	1	1157	1	1
				199	circBBS7	1	1158	1	1
				200	circBBX	1	1159	1	1
				201	circBCL11A	0.168168	183	1	1
				202	circBDP1_1	0.4202	460	1	1
				203	circBDP1_2	0.641437	872	1	1
				204	circBEND7	1	1160	1	1
				205	circBICRAL	1	1161	1	1
				206	circBIRC6_1	1	1162	1	1
				207	circBIRC6_2	1	1163	1	1
				208	circBIVM	0.628838	837	1	1
				209	circBMP2K	1	1164	1	1
				210	circBMPR1A	1	1165	1	1
				211	circBMPR1B	1	1012	1	1
				212	circBMPR2_1	1	1166	1	1
				213	circBMPR2_2	1	1167	1	1
				214	circBRAF_1	0.500328	600	1	1
				215	circBRAF_2	1	1045	1	1
				216	circBRD4	0.576835	818	1	1
				217	circBRD7	0.360296	392	1	1
				218	circBRWD1_1	1	1168	1	1
				219	circBRWD1_2	1	1169	1	1
				220	circBRWD1_3	1	1170	1	1
				221	circBRWD1_4	1	1046	1	1
				222	circBRWD1_5	1	1171	1	1
				223	circBRWD1_6	1	1172	1	1
				224	circBTAF1_1	0.166799	177	1	1
				225	circBTAF1_2	1	1173	1	1
				226	circBTBD7	0.238784	249	1	1
				227	circC18orf25	0.353926	386	1	1
				228	circC2CD5	1	1174	1	1
				229	circC2orf42	0.276715	348	1	1
				230	circCACUL1	0.508245	698	1	1
				231	circCADM1	1	1175	1	1
				232	circCADPS2_1	0.50033	679	1	1
				233	circCADPS2_2	1	1176	1	1
				234	circCANX_1	1	1177	1	1
				235	circCANX_2	1	1178	1	1
				236	circCAPN2_1	0.427379	467	1	1
				237	circCAPN2_2	1	1179	1	1
				238	circCAPZA1	0.256414	307	1	1
				239	circCARF	0.50033	653	1	1
				240	circCASC4_1	0.632472	856	1	1
				241	circCASC4_2	1	1180	1	1
				242	circCAT	1	1181	1	1
				243	circCBFA2T2_1	0.477913	506	1	1
				244	circCBFA2T2_2	1	1182	1	1
				245	circCBL	1	1183	1	1
				246	circCBX1	0.500328	601	1	1
				247	circCC2D2A	0.250165	252	1	1
				248	circCCAR1	0.289495	353	1	1
				249	circCCAR1_1	0.364287	397	1	1
				250	circCCAR1_2	0.554077	722	1	1
				251	circCCAR1_3	0.789697	968	1	1
				252	circCCAR1_4	0.524482	709	1	1
				253	circCCAR1_5	1	1047	1	1
				254	circCCAR1_6	1	1184	1	1
				255	circCCDC149	0.632492	857	1	1
				256	circCCDC30_1	0.0240472	31	1	1
				257	circCCDC30_2	1	1185	1	1
				258	circCCDC58	1	1186	1	1
				259	circCCDC66	1	1187	1	1
				260	circCCDC69	0.562025	770	1	1
				261	circCCT3_1	0.405925	449	1	1
				262	circCCT3_2	1	1033	1	1
				263	circCCT3_3	1	1188	1	1
				264	circCCZ1	1	1189	1	1
				265	circCD46_1	0.0313532	36	1	1
				266	circCD46_2	1	1190	1	1
				267	circCDC123	1	1191	1	1
				268	circCDC42BPA	1	1192	1	1
				269	circCDCP1	0.50011	525	1	1
				270	circCDH1_1	0.269272	336	1	1
				271	circCDH1_2	0.500328	602	1	1
				272	circCDK12	0.554268	751	1	1
				273	circCDK13_1	0.123327	120	1	1
				274	circCDK13_2	1	1193	1	1
				275	circCDK19	0.131867	142	1	1
				276	circCDK8	1	1194	1	1
				277	circCECR2	1	1195	1	1
				278	circCENPC	1	1196	1	1
				279	circCEP128_1	0.264853	324	1	1
				280	circCEP128_2	1	1048	1	1
				281	circCEP162_1	0.554268	752	1	1
				282	circCEP162_2	0.687706	889	1	1
				283	circCEP162_3	1	1197	1	1
				284	circCEP295	0.254232	272	1	1
				285	circCEP350_1	0.609215	825	1	1
				286	circCEP350_2	1	996	1	1
				287	circCEP63	0.0790371	83	1	1
				288	circCFDP1_1	0.00617778	14	0.762515	0.762515
				289	circCFDP1_2	1	1198	1	1
				290	circCHCHD6	1	1199	1	1
				291	circCHD2_1	0.219059	232	1	1
				292	circCHD2_2	0.399682	443	1	1
				293	circCHD2_3	0.518097	708	1	1
				294	circCHD2_4	0.562025	771	1	1
				295	circCHD2_5	1	1200	1	1
				296	circCHD7_1	0.424675	464	1	1
				297	circCHD7_2	0.375275	407	1	1
				298	circCHD7_3	0.556426	769	1	1
				299	circCHD8	0.364506	400	1	1
				300	circCHD9	1	1201	1	1
				301	circCHP1	0.168168	184	1	1
				302	circCHST15	1	1202	1	1
				303	circCIDEA	0.269272	337	1	1
				304	circCIT	1	1203	1	1
				305	circCLASP1	0.500328	603	1	1
				306	circCLCC1	1	1204	1	1
				307	circCLEC16A	0.50011	526	1	1
				308	circCLIC4	0.508245	699	1	1
				309	circCLIP1_1	1	1205	1	1
				310	circCLIP1_2	1	1049	1	1
				311	circCLK1	1	1206	1	1
				312	circCLNS1A_1	0.131867	143	1	1
				313	circCLNS1A_2	0.250165	253	1	1
				314	circCLOCK	0.500328	604	1	1
				315	circCLPX	1	1207	1	1
				316	circCMAS	0.642454	877	1	1
				317	circCNDP1	1	1208	1	1
				318	circCNN2	0.0156973	23	1	1
				319	circCNOT11	1	1034	1	1
				320	circCNOT6L	0.0773261	79	1	1
				321	circCOBLL1	1	1209	1	1
				322	circCOG3_1	0.0657488	65	1	1
				323	circCOG3_2	0.630276	849	1	1
				324	circCOG3_3	1	1210	1	1
				325	circCOG3_4	1	1211	1	1
				326	circCOG3_5	1	1212	1	1
				327	circCOG7	1	1013	1	1
				328	circCOP1_1	0.250165	254	1	1
				329	circCOP1_2	0.269272	338	1	1
				330	circCOPA_1	1	1213	1	1
				331	circCOPA_2	1	1214	1	1
				332	circCPEB2	1	1215	1	1
				333	circCPEB3	0.500328	605	1	1
				334	circCPEB4_1	1	1216	1	1
				335	circCPEB4_2	1	1050	1	1
				336	circCPM_1	0.182256	204	1	1
				337	circCPM_2	0.625165	829	1	1
				338	circCPNE3	0.554077	723	1	1
				339	circCRAMP1	0.448697	480	1	1
				340	circCREB5	0.255717	290	1	1
				341	circCREBBP_1	0.0286298	34	1	1
				342	circCREBBP_2	1	1217	1	1
				343	circCREBBP_3	1	1218	1	1
				344	circCREBBP_4	1	1219	1	1
				345	circCREBRF_1	0.197549	214	1	1
				346	circCREBRF_2	0.393379	439	1	1
				347	circCREBRF_3	0.500328	606	1	1
				348	circCRIM1	1	1220	1	1
				349	circCRYBG1	1	1221	1	1
				350	circCSDE1	1	1222	1	1
				351	circCSGALNACT2	0.57471	785	1	1
				352	circCSN1S1_1	0.000745819	3	0.429592	0.429592
				353	circCSN1S1_2	0.0398137	48	1	1
				354	circCSN1S1_3	1	1223	1	1
				355	circCSN1S1_4	1	1224	1	1
				356	circCSN1S2_1	0.128731	137	1	1
				357	circCSN1S2_2	1	1225	1	1
				358	circCSN1S2_3	1	1226	1	1
				359	circCSNK1G1	0.50033	654	1	1
				360	circCSNK1G2	1	1227	1	1
				361	circCSNK1G3	0.500299	585	1	1
				362	circCSNK2A1	1	1051	1	1
				363	circCSPP1	0.50033	655	1	1
				364	circCSPP1	0.726803	915	1	1
				365	circCTNNA1	1	1228	1	1
				366	circCTSV	0.00122033	4	0.527181	0.527181
				367	circCUL3	0.50033	680	1	1
				368	circCUL5	1	1229	1	1
				369	circCYLD_1	0.748288	936	1	1
				370	circCYLD_2	1	1230	1	1
				371	circCYP51A1	0.585803	821	1	1
				372	circDARS2	1	1231	1	1
				373	circDCAF5	0.554077	724	1	1
				374	circDCAF6	1	1232	1	1
				375	circDCP2	0.256414	308	1	1
				376	circDCUN1D1_1	0.0388226	44	1	1
				377	circDCUN1D1_2	0.0705532	72	1	1
				378	circDCUN1D4_1	0.0354499	40	1	1
				379	circDCUN1D4_2	1	1233	1	1
				380	circDDHD1	0.174128	190	1	1
				381	circDDHD1	1	1234	1	1
				382	circDDHD2	0.494802	511	1	1
				383	circDDX1	0.500328	607	1	1
				384	circDDX10	1	1235	1	1
				385	circDDX17_1	0.50011	527	1	1
				386	circDDX17_2	1	1236	1	1
				387	circDDX27	0.375275	408	1	1
				388	circDDX50_1	0.50033	656	1	1
				389	circDDX50_2	1	997	1	1
				390	circDEK	0.50011	528	1	1
				391	circDENND1B_1	0.254278	284	1	1
				392	circDENND1B_2	0.701359	909	1	1
				393	circDENND1B_3	0.50033	681	1	1
				394	circDENND4C_1	0.277077	349	1	1
				395	circDENND4C_2	0.595252	823	1	1
				396	circDENND4C_3	1	1237	1	1
				397	circDENND6A	0.50011	529	1	1
				398	circDGKH	1	1238	1	1
				399	circDHRSX	0.500328	608	1	1
				400	circDHX36	1	1239	1	1
				401	circDHX57	1	1240	1	1
				402	circDICER1	1	1241	1	1
				403	circDIMT1	0.399318	442	1	1
				404	circDIP2B	0.50033	682	1	1
				405	circDIP2C	1	1242	1	1
				406	circDISC1	0.453486	492	1	1
				407	circDLD	0.554077	725	1	1
				408	circDLG1_1	0.57471	786	1	1
				409	circDLG1_2	0.554077	726	1	1
				410	circDLG1_3	0.638735	863	1	1
				411	circDLG1_4	1	1243	1	1
				412	circDLG1_5	1	1244	1	1
				413	circDMXL1	0.630888	853	1	1
				414	circDNAJA1	1	1245	1	1
				415	circDNAJB6	1	1052	1	1
				416	circDNAJC1	1	1246	1	1
				417	circDNAJC13	0.500299	586	1	1
				418	circDNAJC14	0.554268	753	1	1
				419	circDNAJC16	1	1247	1	1
				420	circDNAJC2	1	1248	1	1
				421	circDOCK1_1	0.554077	727	1	1
				422	circDOCK1_2	0.585803	822	1	1
				423	circDOCK1_3	1	1249	1	1
				424	circDOCK1_4	1	1250	1	1
				425	circDOCK1_5	1	1251	1	1
				426	circDOCK1_6	1	1252	1	1
				427	circDOCK11	1	1253	1	1
				428	circDOCK4	0.388333	436	1	1
				429	circDTNB_1	0.472478	503	1	1
				430	circDTNB_2	0.754177	948	1	1
				431	circDTNB_3	1	1254	1	1
				432	circDYSF	1	1255	1	1
				433	circECH1	0.790849	969	1	1
				434	circECPAS	0.205403	223	1	1
				435	circEDC3	0.545209	711	1	1
				436	circEED_1	0.500328	609	1	1
				437	circEED_2	0.57471	787	1	1
				438	circEED_3	1	1256	1	1
				439	circEFL1_1	0.554268	754	1	1
				440	circEFL1_2	1	1257	1	1
				441	circEGFR	1	1014	1	1
				442	circEHBP1_1	0.125165	122	1	1
				443	circEHBP1_2	0.475219	504	1	1
				444	circEIF2AK1_1	0.50011	530	1	1
				445	circEIF2AK1_2	1	1258	1	1
				446	circEIF2AK4	0.215986	229	1	1
				447	circEIF3A_1	1	1259	1	1
				448	circEIF3A_2	1	1260	1	1
				449	circEIF4E3	1	1261	1	1
				450	circELF2	0.721019	913	1	1
				451	circELL2_1	0.424675	465	1	1
				452	circELL2_2	0.500296	567	1	1
				453	circELP1	1	1262	1	1
				454	circEMC2	1	1263	1	1
				455	circEML4	1	1015	1	1
				456	circEML6	0.448697	481	1	1
				457	circEMSY_1	0.0216199	28	1	1
				458	circEMSY_2	0.50011	531	1	1
				459	circENOPH1	0.219059	233	1	1
				460	circEPCAM	0.00641163	15	0.73862	0.73862
				461	circEPN2_1	0.119227	118	1	1
				462	circEPN2_2	1	1264	1	1
				463	circEPS15_1	0.57471	788	1	1
				464	circEPS15_2	1	1265	1	1
				465	circERBB2	0.364287	398	1	1
				466	circERBIN_1	1	1266	1	1
				467	circERBIN_2	1	1267	1	1
				468	circERC1	1	1268	1	1
				469	circERCC6L2	1	1269	1	1
				470	circERI3_1	0.695547	907	1	1
				471	circERI3_2	0.687706	890	1	1
				472	circERI3_3	1	1053	1	1
				473	circERI3_4	1	1028	1	1
				474	circERLEC1_1	1	1270	1	1
				475	circERLEC1_2	1	1271	1	1
				476	circERO1B	0.57471	789	1	1
				477	circERP44	1	1272	1	1
				478	circESCO1_1	0.0705532	73	1	1
				479	circESCO1_2	0.775304	960	1	1
				480	circESCO1_3	1	1273	1	1
				481	circESR1	0.256414	309	1	1
				482	circETFA	0.62971	840	1	1
				483	circEVI5_1	1	1274	1	1
				484	circEVI5_2	1	1275	1	1
				485	circEVI5_3	1	1276	1	1
				486	circEVL	1	1277	1	1
				487	circEXOC1	0.142512	157	1	1
				488	circEXOC2	0.250165	255	1	1
				489	circEXOC6B	1	1278	1	1
				490	circEZH2_1	0.255717	291	1	1
				491	circEZH2_2	0.428392	469	1	1
				492	circEZH2_3	1	1035	1	1
				493	circEZR	1	1054	1	1
				494	circF8	0.500328	610	1	1
				495	circFADS3	1	1279	1	1
				496	circFAM114A2	1	1280	1	1
				497	circFAM117B	1	1055	1	1
				498	circFAM120A_1	1	1003	1	1
				499	circFAM120A_2	1	1056	1	1
				500	circFAM120B	0.500328	611	1	1
				501	circFAM120C	1	1281	1	1
				502	circFAM129A	1	1282	1	1
				503	circFAM13B	0.500328	612	1	1
				504	circFAM160B1	0.50011	532	1	1
				505	circFAM208A_1	0.500299	587	1	1
				506	circFAM208A_2	0.500296	568	1	1
				507	circFAM208B_1	0.197441	211	1	1
				508	circFAM208B_2	1	1283	1	1
				509	circFAM228B_3	1	1284	1	1
				510	circFAM241A	1	1285	1	1
				511	circFANCL_1	0.1672	180	1	1
				512	circFANCL_2	1	1286	1	1
				513	circFARP1	0.142512	158	1	1
				514	circFBXO11	1	1287	1	1
				515	circFBXO28	1	1288	1	1
				516	circFBXW4	0.0388226	45	1	1
				517	circFCHO2_1	0.174117	189	1	1
				518	circFCHO2_2	1	1289	1	1
				519	circFCHSD2_1	0.000286752	2	0.247754	0.247754
				520	circFCHSD2_2	0.375275	409	1	1
				521	circFCHSD2_3	0.500296	569	1	1
				522	circFCHSD2_4	0.57471	790	1	1
				523	circFCHSD2_5	0.431622	471	1	1
				524	circFCHSD2_6	1	1290	1	1
				525	circFDFT1	0.500328	613	1	1
				526	circFES	1	1291	1	1
				527	circFGD4	1	1292	1	1
				528	circFGFR1	1	1038	1	1
				529	circFHOD3	0.453486	493	1	1
				530	circFIG4_1	0.133087	148	1	1
				531	circFIG4_2	1	1293	1	1
				532	circFIP1L1_1	0.630264	843	1	1
				533	circFIP1L1_2	1	1294	1	1
				534	circFKBP8	0.18012	195	1	1
				535	circFLT1	0.302563	369	1	1
				536	circFLVCR1_1	1	1295	1	1
				537	circFLVCR1_2	1	1296	1	1
				538	circFNBP1L	0.500328	614	1	1
				539	circFNDC3B_1	0.450686	489	1	1
				540	circFNDC3B_2	1	1297	1	1
				541	circFNIP1_1	1	1298	1	1
				542	circFNIP1_2	1	1299	1	1
				543	circFNIP1_3	1	1300	1	1
				544	circFNIP2	0.500328	615	1	1
				545	circFOPNL	0.269272	339	1	1
				546	circFOXK2_1	0.85601	986	1	1
				547	circFOXK2_2	1	1301	1	1
				548	circFOXN2_3	0.57471	791	1	1
				549	circFOXO3	1	1005	1	1
				550	circFOXP1	0.131867	144	1	1
				551	circFTO_1	0.0566124	53	1	1
				552	circFTO_2	0.250533	270	1	1
				553	circFTO_3	0.500296	570	1	1
				554	circFTO_4	0.630275	847	1	1
				555	circGALNT11	0.453486	494	1	1
				556	circGAN	1	1302	1	1
				557	circGANC	0.353996	387	1	1
				558	circGATAD2A	1	1303	1	1
				559	circGCA	1	1016	1	1
				560	circGDI2_1	1	1304	1	1
				561	circGDI2_2	1	1305	1	1
				562	circGFPT1	0.430163	470	1	1
				563	circGGNBP2_1	0.0078607	18	0.754627	0.754627
				564	circGGNBP2_2	1	1306	1	1
				565	circGIGYF2_1	0.102926	102	1	1
				566	circGIGYF2_2	0.264807	317	1	1
				567	circGIGYF2_3	1	1307	1	1
				568	circGMDS	0.142512	159	1	1
				569	circGNB1_1	0.500328	616	1	1
				570	circGNB1_2	1	1004	1	1
				571	circGNL3	0.44149	472	1	1
				572	circGNPTAB_1	0.500328	617	1	1
				573	circGNPTAB_2	1	1308	1	1
				574	circGOLGB1	0.125165	123	1	1
				575	circGOLPH3	0.0364701	41	1	1
				576	circGOLPH3L	0.641416	865	1	1
				577	circGON4L	0.664362	882	1	1
				578	circGPAM	0.57471	792	1	1
				579	circGPBP1_1	0.125289	134	1	1
				580	circGPBP1_2	1	1309	1	1
				581	circGPBP1_3	1	1310	1	1
				582	circGPBP1_4	1	1311	1	1
				583	circGPHN_1	0.250165	256	1	1
				584	circGPHN_2	0.496563	512	1	1
				585	circGRAMD1C	0.641416	866	1	1
				586	circGRIPAP1	0.100189	99	1	1
				587	circGSPT1_1	0.109762	105	1	1
				588	circGSPT1_2	1	1057	1	1
				589	circGSPT1_3	1	1312	1	1
				590	circGSTCD	0.012681	21	1	1
				591	circGTF2I_1	0.375275	410	1	1
				592	circGTF2I_2	0.416195	451	1	1
				593	circGTF2I_3	1	1313	1	1
				594	circGTF2I_4	1	1314	1	1
				595	circGUF1	1	1058	1	1
				596	circGULP1_1	0.16514	173	1	1
				597	circGULP1_2	0.428168	468	1	1
				598	circGULP1_3	0.500328	618	1	1
				599	circGULP1_4	0.894501	992	1	1
				600	circGULP1_5	1	1029	1	1
				601	circGXYLT1_1	0.129622	140	1	1
				602	circGXYLT1_2	0.562025	772	1	1
				603	circH2AFY	1	1315	1	1
				604	circHADH	1	1316	1	1
				605	circHAT1	1	1317	1	1
				606	circHDGFL3_1	0.500328	619	1	1
				607	circHDGFL3_2	1	1318	1	1
				608	circHDLBP	0.625165	830	1	1
				609	circHEATR3_1	0.264807	318	1	1
				610	circHEATR3_2	0.448697	482	1	1
				611	circHEATR3_3	1	1319	1	1
				612	circHECTD1	1	1320	1	1
				613	circHEG1	0.0498863	50	1	1
				614	circHERC1	0.687706	891	1	1
				615	circHERC4	0.500328	620	1	1
				616	circHERPUD2	0.50033	657	1	1
				617	circHIBADH	0.114933	114	1	1
				618	circHIF1A	0.50011	533	1	1
				619	circHIPK2	0.632591	859	1	1
				620	circHIPK3	0.840664	983	1	1
				621	circHMCN1	0.254278	285	1	1
				622	circHMGXB3_1	1	1059	1	1
				623	circHMGXB3_2	1	1321	1	1
				624	circHSPD1	0.256414	310	1	1
				625	circHTT	0.687706	892	1	1
				626	circHUWE1_1	0.128731	138	1	1
				627	circHUWE1_2	0.50011	534	1	1
				628	circHUWE1_3	0.50033	658	1	1
				629	circIARS_1	0.141861	155	1	1
				630	circIARS_2	1	1322	1	1
				631	circIDE	1	1323	1	1
				632	circIDH2_1	0.0729731	77	1	1
				633	circIDH2_2	1	1324	1	1
				634	circIFNGR2	1	1325	1	1
				635	circIFT80	1	1326	1	1
				636	circIFT88_1	0.50011	535	1	1
				637	circIFT88_2	0.500328	621	1	1
				638	circIGBP1	1	1327	1	1
				639	circIGF1R	1	1328	1	1
				640	circIGSF9	0.375275	411	1	1
				641	circIKBKB	1	1329	1	1
				642	circIL6ST_1	1	1330	1	1
				643	circIL6ST_2	1	1331	1	1
				644	circINO80	1	1060	1	1
				645	circINPP4B	1	1332	1	1
				646	circINPP5A	1	1333	1	1
				647	circINSIG1	0.57471	793	1	1
				648	circINTS10	0.641416	867	1	1
				649	circINVS	1	1334	1	1
				650	circIPMK	0.264807	319	1	1
				651	circIQGAP2_1	1	1335	1	1
				652	circIQGAP2_2	1	1336	1	1
				653	circISM1_1	0.256414	311	1	1
				654	circISM1_2	1	1337	1	1
				655	circITCH_1	0.555896	767	1	1
				656	circITCH_2	1	1338	1	1
				657	circITCH_3	1	1339	1	1
				658	circITFG1	1	1340	1	1
				659	circITGAV	0.264853	325	1	1
				660	circITGB8	0.0042432	11	0.666569	0.666569
				661	circITPR2_1	0.50011	536	1	1
				662	circITPR2_2	1	1341	1	1
				663	circITPR2_3	1	1342	1	1
				664	circITSN1_1	0.445257	477	1	1
				665	circITSN1_2	0.491537	508	1	1
				666	circJMJD1C_1	1	1343	1	1
				667	circJMJD1C_2	1	1061	1	1
				668	circJMY	1	1344	1	1
				669	circKANSL1	0.0086169	20	0.7445	0.7445
				670	circKANSL1L_1	0.219059	234	1	1
				671	circKANSL1L_2	0.116115	115	1	1
				672	circKANSL1L_3	0.189536	206	1	1
				673	circKANSL1L_4	1	1345	1	1
				674	circKANSL3	0.500328	622	1	1
				675	circKARS	0.448697	483	1	1
				676	circKATNBL1_1	0.0879236	90	1	1
				677	circKATNBL1_2	0.57471	794	1	1
				678	circKATNBL1_3	1	1346	1	1
				679	circKCMF1	0.125165	124	1	1
				680	circKCTD9_1	0.0722123	76	1	1
				681	circKCTD9_2	0.255717	292	1	1
				682	circKCTD9_3	0.641437	873	1	1
				683	circKCTD9_4	1	1347	1	1
				684	circKDM1A	0.255717	293	1	1
				685	circKDM2A	0.500328	623	1	1
				686	circKDM4B	0.57471	795	1	1
				687	circKDM4C	1	1348	1	1
				688	circKDM5A_1	0.393379	440	1	1
				689	circKDM5A_2	0.670989	884	1	1
				690	circKDM5A_3	1	1349	1	1
				691	circKDM5B_4	0.453486	495	1	1
				692	circKDM5B_5	1	1350	1	1
				693	circKDM7A_1	0.375275	412	1	1
				694	circKDM7A_2	1	1351	1	1
				695	circKIAA1217_1	0.289495	354	1	1
				696	circKIAA1217_2	0.562025	773	1	1
				697	circKIAA1217_3	1	1352	1	1
				698	circKIAA2026_1	1	1353	1	1
				699	circKIAA2026_2	1	1354	1	1
				700	circKIF13A	1	1355	1	1
				701	circKIF21A	0.109762	106	1	1
				702	circKIF5B	0.554268	755	1	1
				703	circKIF5B	1	1356	1	1
				704	circKIN	1	1357	1	1
				705	circKLHL24_1	0.0626375	58	1	1
				706	circKLHL24_2	0.508245	700	1	1
				707	circKMT2A	1	1358	1	1
				708	circKMT2C_1	0.0707064	74	1	1
				709	circKMT2C_2	0.105161	104	1	1
				710	circKMT2C_3	0.727809	920	1	1
				711	circKMT2E_1	1	1359	1	1
				712	circKMT2E_2	1	1360	1	1
				713	circKMT2E_3	1	1361	1	1
				714	circKMT2E_4	1	1362	1	1
				715	circKMT2E_5	1	1062	1	1
				716	circKMT5B	0.375275	413	1	1
				717	circKPNA4	0.749599	941	1	1
				718	circKRIT1_1	0.375275	414	1	1
				719	circKRIT1_2	1	1363	1	1
				720	circKRT23	0.50011	537	1	1
				721	circKTN1_1	0.493699	510	1	1
				722	circKTN1_2	0.57471	796	1	1
				723	circL3MBTL3	0.131867	145	1	1
				724	circLAPTM4B_1	0.500296	571	1	1
				725	circLAPTM4B_2	0.554077	728	1	1
				726	circLARP4	1	1063	1	1
				727	circLARP4B_1	0.4202	461	1	1
				728	circLARP4B_2	0.803964	973	1	1
				729	circLASP1	1	1064	1	1
				730	circLATS1	0.345972	383	1	1
				731	circLDLR	0.18012	196	1	1
				732	circLDLRAD3	0.50011	538	1	1
				733	circLIFR_1	0.375275	415	1	1
				734	circLIFR_2	1	1364	1	1
				735	circLIN54_1	0.142512	160	1	1
				736	circLIN54_2	1	1365	1	1
				737	circLMBR1_1	0.750389	942	1	1
				738	circLMBR1_2	1	1366	1	1
				739	circLMBR1L	0.255788	300	1	1
				740	circLMBRD2	0.554077	729	1	1
				741	circLMNTD1_1	0.687706	893	1	1
				742	circLMNTD1_2	1	1367	1	1
				743	circLMNTD1_3	1	1368	1	1
				744	circLNX1	1	1369	1	1
				745	circLOC110259338	0.250165	257	1	1
				746	circLONP2_1	0.123066	119	1	1
				747	circLONP2_2	0.500328	624	1	1
				748	circLPGAT1	0.375275	416	1	1
				749	circLPP	0.264853	326	1	1
				750	circLPXN	0.508245	701	1	1
				751	circLRBA	0.444129	476	1	1
				752	circLRCH1_1	0.500328	625	1	1
				753	circLRCH1_2	0.507582	697	1	1
				754	circLRCH3_1	1	1370	1	1
				755	circLRCH3_2	1	1371	1	1
				756	circLRP6_1	1	1372	1	1
				757	circLRP6_2	1	1373	1	1
				758	circLRP6_3	1	1374	1	1
				759	circLRRC1	1	1375	1	1
				760	circLRRIQ3	0.632561	858	1	1
				761	circLSM14A_1	0.206254	224	1	1
				762	circLSM14A_2	0.554077	730	1	1
				763	circLSM14A_3	0.694894	906	1	1
				764	circLSM14A_4	0.750389	943	1	1
				765	circLTF	1	1376	1	1
				766	circLYRM7	0.0854588	86	1	1
				767	circLYST	0.18012	197	1	1
				768	circMACC1	1	1065	1	1
				769	circMACF1	0.125289	135	1	1
				770	circMADD	1	1377	1	1
				771	circMAGI1_1	0.250165	258	1	1
				772	circMAGT1_2	0.50011	539	1	1
				773	circMALT1_3	1	1378	1	1
				774	circMAP2K1_1	0.219059	235	1	1
				775	circMAP3K1_2	0.641416	868	1	1
				776	circMAP3K2_1	0.0750949	78	1	1
				777	circMAP3K2_2	1	1379	1	1
				778	circMAP3K3	1	1380	1	1
				779	circMAPK6_1	1	1381	1	1
				780	circMAPK6_2	1	1382	1	1
				781	circMAPKAP1_1	0.500328	626	1	1
				782	circMAPKAP1_2	1	1383	1	1
				783	circMARCH7_1	0.50033	683	1	1
				784	circMARCH7_2	0.726803	916	1	1
				785	circMARK1	1	1384	1	1
				786	circMAST3	0.289495	355	1	1
				787	circMAST4	1	1385	1	1
				788	circMATR3_1	0.0156973	24	1	1
				789	circMATR3_2	0.871241	989	1	1
				790	circMATR3_3	1	1386	1	1
				791	circMBD5	1	1387	1	1
				792	circMCCC1_1	0.254278	286	1	1
				793	circMCCC1_2	1	1388	1	1
				794	circMCMBP	0.00393726	10	0.680358	0.680358
				795	circMDFIC	1	1389	1	1
				796	circMED14	1	1066	1	1
				797	circMED17	0.50033	684	1	1
				798	circMEF2A	0.443739	473	1	1
				799	circMEMO1	0.354042	389	1	1
				800	circMETTL9	0.167956	181	1	1
				801	circMFAP1_1	0.142512	161	1	1
				802	circMFAP1_2	1	1390	1	1
				803	circMFSD14A	1	1391	1	1
				804	circMFSD6	0.254278	287	1	1
				805	circMGA_1	0.811379	977	1	1
				806	circMGA_2	1	1392	1	1
				807	circMGAM2	0.364287	399	1	1
				808	circMIA2	1	1393	1	1
				809	circMIB1_1	0.375275	417	1	1
				810	circMIB1_2	1	1394	1	1
				811	circMICU2	0.146528	167	1	1
				812	circMINDY3_1	0.113764	110	1	1
				813	circMINDY3_2	0.267536	332	1	1
				814	circMINDY3_3	0.545405	712	1	1
				815	circMIPOL1	0.500328	627	1	1
				816	circMIS18BP1_1	0.0156973	25	1	1
				817	circMIS18BP1_2	0.142512	162	1	1
				818	circMKLN1_1	0.0920389	95	1	1
				819	circMKLN1_2	1	1395	1	1
				820	circMLLT10_1	0.528948	710	1	1
				821	circMLLT10_2	0.500328	628	1	1
				822	circMLLT10_3	0.758665	951	1	1
				823	circMLLT3	0.267536	333	1	1
				824	circMNAT1_1	0.255717	294	1	1
				825	circMNAT1_2	0.375275	418	1	1
				826	circMOBKL3	0.554077	731	1	1
				827	circMORC3_1	0.254232	273	1	1
				828	circMORC3_2	1	1396	1	1
				829	circMPHOSPH9	1	1397	1	1
				830	circMPP6	0.35077	385	1	1
				831	circMPZL1	1	1398	1	1
				832	circMRPL42	0.0720402	75	1	1
				833	circMRPS35	0.554077	732	1	1
				834	circMRPS5	0.038742	43	1	1
				835	circMRS2	1	1399	1	1
				836	circMSH3_1	0.500328	629	1	1
				837	circMSH3_2	0.774711	958	1	1
				838	circMSH3_3	1	1400	1	1
				839	circMSRB3	0.57471	797	1	1
				840	circMTERF3	0.180237	200	1	1
				841	circMTFR1	0.289495	356	1	1
				842	circMTHFSD_1	0.344291	378	1	1
				843	circMTHFSD_2	0.625165	831	1	1
				844	circMTHFSD_3	0.734687	928	1	1
				845	circMTM1_1	0.109762	107	1	1
				846	circMTM1_2	0.250165	259	1	1
				847	circMTMR14	0.219059	236	1	1
				848	circMTMR3	0.111521	108	1	1
				849	circMTMR6_1	0.0870762	88	1	1
				850	circMTMR6_2	0.254232	274	1	1
				851	circMTOR	1	1401	1	1
				852	circMTR_1	1	1402	1	1
				853	circMTR_2	1	1403	1	1
				854	circMTUS1	0.102709	100	1	1
				855	circMUC4_1	0.208067	225	1	1
				856	circMUC4_2	1	1404	1	1
				857	circMUT	1	1405	1	1
				858	circMYH11	1	1406	1	1
				859	circMYO1B	0.500296	572	1	1
				860	circMYO5C	1	1067	1	1
				861	circMYO9A_1	1	1407	1	1
				862	circMYO9A_2	1	1408	1	1
				863	circMYO9A_3	1	1409	1	1
				864	circMYO9B_1	0.554268	756	1	1
				865	circMYO9B_2	0.625165	832	1	1
				866	circMYOF_1	0.256414	312	1	1
				867	circMYOF_2	0.448697	484	1	1
				868	circMYOF_3	1	1017	1	1
				869	circMYOF_4	1	1410	1	1
				870	circN4BP1	1	1411	1	1
				871	circN4BP2L2	0.375275	419	1	1
				872	circNAA15_1	0.174128	191	1	1
				873	circNAA15_2	1	1412	1	1
				874	circNAA15_3	1	1413	1	1
				875	circNAA16	0.726803	917	1	1
				876	circNAA35	1	1414	1	1
				877	circNAA50	0.202148	220	1	1
				878	circNAALADL2	0.562025	774	1	1
				879	circNALCN_1	0.197441	212	1	1
				880	circNALCN_2	0.49116	507	1	1
				881	circNALCN_3	0.63445	860	1	1
				882	circNARS_1	0.354042	390	1	1
				883	circNARS_2	1	1415	1	1
				884	circNBEA_1	0.554268	757	1	1
				885	circNBEA_2	1	1001	1	1
				886	circNBR1	0.57471	798	1	1
				887	circNBR1	1	1416	1	1
				888	circNCOA6	1	1417	1	1
				889	circNCOR1_1	0.0393248	47	1	1
				890	circNCOR1_2	0.375275	420	1	1
				891	circNCOR1_3	0.375275	421	1	1
				892	circNCOR1_4	1	1418	1	1
				893	circNDEL1_1	0.375275	422	1	1
				894	circNDEL1_2	1	1419	1	1
				895	circNDFIP2_1	0.0809363	84	1	1
				896	circNDFIP2_2	0.219059	237	1	1
				897	circNDFIP2_3	0.255717	295	1	1
				898	circNDFIP2_4	1	1420	1	1
				899	circNDFIP2_5	1	1421	1	1
				900	circNDUFS1_1	0.50033	659	1	1
				901	circNDUFS1_2	1	1422	1	1
				902	circNDUFV2	0.721019	914	1	1
				903	circNECTIN3	0.777738	963	1	1
				904	circNEK1_1	0.142512	163	1	1
				905	circNEK1_2	0.361127	394	1	1
				906	circNEK4	0.581607	820	1	1
				907	circNELFCD	0.500299	588	1	1
				908	circNF1_1	0.125165	125	1	1
				909	circNF1_2	0.500296	573	1	1
				910	circNFAT5	1	1036	1	1
				911	circNFATC3	0.254232	275	1	1
				912	circNFIB	1	1423	1	1
				913	circNFIX	0.510897	705	1	1
				914	circNFKB1_1	1	1424	1	1
				915	circNFKB1_2	1	1425	1	1
				916	circNFYC_1	0.125165	126	1	1
				917	circNFYC_2	0.500328	630	1	1
				918	circNFYC_3	1	1426	1	1
				919	circNGLY1	1	1427	1	1
				920	circNIPBL	0.0581895	55	1	1
				921	circNKAP	0.728384	921	1	1
				922	circNKTR_1	0.116156	116	1	1
				923	circNKTR_2	1	1428	1	1
				924	circNOL10_1	1	1429	1	1
				925	circNOL10_2	1	1430	1	1
				926	circNONO	1	1431	1	1
				927	circNOS3	0.500328	631	1	1
				928	circNOTCH2	0.419947	454	1	1
				929	circNOTCH3	0.57471	799	1	1
				930	circnovel_1	0.254232	276	1	1
				931	circnovel_2	0.50033	660	1	1
				932	circnovel_3	0.687706	894	1	1
				933	circnovel_4	0.691308	905	1	1
				934	circnovel_5	1	1030	1	1
				935	circNOX4	0.500299	589	1	1
				936	circNPAT_1	0.102899	101	1	1
				937	circNPAT_2	1	1432	1	1
				938	circNPEPPS	0.50033	685	1	1
				939	circNPLOC4	0.500328	632	1	1
				940	circNR2C1	0.219059	238	1	1
				941	circNR3C2	0.761622	953	1	1
				942	circNRDC	0.0905086	92	1	1
				943	circNSD1_1	1	1068	1	1
				944	circNSD1_2	1	1433	1	1
				945	circNSUN6_1	1	1434	1	1
				946	circNSUN6_2	1	1435	1	1
				947	circNTRK2	1	1436	1	1
				948	circNUCB1	0.0078607	19	0.71491	0.71491
				949	circNUCKS1_1	0.131867	146	1	1
				950	circNUCKS1_2	0.166595	174	1	1
				951	circNUCKS1_3	0.814469	979	1	1
				952	circNUDT21	0.264807	320	1	1
				953	circNUP155_1	1	1437	1	1
				954	circNUP155_2	1	1438	1	1
				955	circNUP155_3	1	1439	1	1
				956	circNUPL2	0.50033	661	1	1
				957	circNUS1	0.254232	277	1	1
				958	circOAT	0.50011	540	1	1
				959	circODR4	0.365037	401	1	1
				960	circODR4	1	1440	1	1
				961	circOGA_1	0.630264	844	1	1
				962	circOGA_2	1	1441	1	1
				963	circOPHN1	0.625165	833	1	1
				964	circORC4	0.625165	834	1	1
				965	circOSBPL1A	0.50033	662	1	1
				966	circOSBPL9_1	0.254278	288	1	1
				967	circOSBPL9_2	0.631709	855	1	1
				968	circOSBPL9_3	1	1442	1	1
				969	circOSGIN2	1	998	1	1
				970	circOTUD4_1	0.125165	127	1	1
				971	circOTUD4_2	0.142512	164	1	1
				972	circOTUD4_3	1	1443	1	1
				973	circOXA1L	0.264853	327	1	1
				974	circOXCT1_1	0.0313532	37	1	1
				975	circOXCT1_2	0.289495	357	1	1
				976	circOXR1	0.375275	423	1	1
				977	circP4HA1	1	1444	1	1
				978	circPAFAH1B1	0.803964	974	1	1
				979	circPAK1	0.50011	541	1	1
				980	circPAN3_1	0.0313532	38	1	1
				981	circPAN3_2	0.210919	227	1	1
				982	circPAN3_3	0.139647	153	1	1
				983	circPAN3_4	0.400941	448	1	1
				984	circPAN3_5	0.555002	766	1	1
				985	circPAN3_6	0.500296	574	1	1
				986	circPAN3_7	0.411534	450	1	1
				987	circPAPOLA_1	0.746065	934	1	1
				988	circPAPOLA_2	0.554268	758	1	1
				989	circPAPOLA_3	1	1445	1	1
				990	circPAPOLA_4	1	1018	1	1
				991	circPAPSS1	1	1446	1	1
				992	circPARD3_1	0.500328	633	1	1
				993	circPARD3_2	0.790849	970	1	1
				994	circPARL_1	0.250165	260	1	1
				995	circPARL_2	0.61372	826	1	1
				996	circPARP4	0.166799	178	1	1
				997	circPATJ_1	1	1447	1	1
				998	circPATJ_2	1	1448	1	1
				999	circPAXIP1	0.0854588	87	1	1
				1000	circPBRM1_1	0.384415	431	1	1
				1001	circPBRM1_2	0.50011	542	1	1
				1002	circPCDH19	0.255717	296	1	1
				1003	circPCMTD1_1	0.271931	345	1	1
				1004	circPCMTD1_2	0.787174	967	1	1
				1005	circPCMTD2	1	1449	1	1
				1006	circPCSK5	0.687706	895	1	1
				1007	circPCSK6	1	1450	1	1
				1008	circPCTP	0.125289	136	1	1
				1009	circPDCD4	1	1451	1	1
				1010	circPDCD4_1	0.277457	350	1	1
				1011	circPDCD4_2	0.554077	733	1	1
				1012	circPDCD4_3	1	1452	1	1
				1013	circPDCD4_4	1	1453	1	1
				1014	circPDCD4_5	1	1454	1	1
				1015	circPDE4D	0.125165	128	1	1
				1016	circPDE7A	1	1069	1	1
				1017	circPDIA5	0.500296	575	1	1
				1018	circPDLIM5	0.133087	149	1	1
				1019	circPDPK1	0.152669	170	1	1
				1020	circPDS5A	0.687706	896	1	1
				1021	circPDS5B	1	1455	1	1
				1022	circPER2	0.0905086	93	1	1
				1023	circPGM1	0.174128	192	1	1
				1024	circPGM2L1	0.50011	543	1	1
				1025	circPHC3_1	0.50011	544	1	1
				1026	circPHC3_2	0.50033	663	1	1
				1027	circPHC3_3	0.297959	368	1	1
				1028	circPHC3_4	0.687706	897	1	1
				1029	circPHC3_5	1	1456	1	1
				1030	circPHC3_6	1	1457	1	1
				1031	circPHF20_1	0.254232	278	1	1
				1032	circPHF20_2	1	1458	1	1
				1033	circPHIP	0.000160606	1	0.277527	0.277527
				1034	circPHKB_1	1	1459	1	1
				1035	circPHKB_2	1	1460	1	1
				1036	circPHLDB2	0.687706	898	1	1
				1037	circPHLPP1	1	1461	1	1
				1038	circPHTF1	1	1462	1	1
				1039	circPHYHIPL	0.393379	441	1	1
				1040	circPIAS1_1	0.499168	513	1	1
				1041	circPIAS1_2	0.375275	424	1	1
				1042	circPIAS1_3	0.575607	816	1	1
				1043	circPIAS1_4	1	1463	1	1
				1044	circPIAS1_5	1	1464	1	1
				1045	circPIAS1_6	0.827435	982	1	1
				1046	circPIAS1_7	1	1006	1	1
				1047	circPICALM_1	0.00732606	16	0.791214	0.791214
				1048	circPICALM_2	0.334808	376	1	1
				1049	circPICALM_3	0.359025	391	1	1
				1050	circPICALM_4	1	1465	1	1
				1051	circPICALM_5	1	1466	1	1
				1052	circPIGN	0.57471	800	1	1
				1053	circPIK3C2A_1	0.448697	485	1	1
				1054	circPIK3C2A_2	0.50011	545	1	1
				1055	circPIK3R3	0.554077	734	1	1
				1056	circPIKFYVE	0.254232	279	1	1
				1057	circPITPNB	0.0783335	81	1	1
				1058	circPJA2	0.554268	759	1	1
				1059	circPKN2	0.50033	686	1	1
				1060	circPKNOX1_1	0.219059	239	1	1
				1061	circPKNOX1_2	0.549324	714	1	1
				1062	circPKNOX1_3	1	1019	1	1
				1063	circPLCB1	1	1467	1	1
				1064	circPLCE1	0.421713	462	1	1
				1065	circPLEKHA5_1	0.375275	425	1	1
				1066	circPLEKHA5_2	0.50011	546	1	1
				1067	circPLEKHA5_3	1	1468	1	1
				1068	circPLEKHA5_4	1	1469	1	1
				1069	circPLIN2_1	0.732096	925	1	1
				1070	circPLIN2_2	1	1470	1	1
				1071	circPLPP1_1	0.256414	313	1	1
				1072	circPLPP1_2	0.738671	933	1	1
				1073	circPLXNC1	0.641548	876	1	1
				1074	circPMS1	1	1471	1	1
				1075	circPOLDIP3_1	0.218351	230	1	1
				1076	circPOLDIP3_2	0.50011	547	1	1
				1077	circPOLR3B	1	1070	1	1
				1078	circPPA2	0.735277	930	1	1
				1079	circPPARG	1	1472	1	1
				1080	circPPFIA1	0.47772	505	1	1
				1081	circPPHLN1	0.166595	175	1	1
				1082	circPPIG	1	1020	1	1
				1083	circPPM1B	1	1473	1	1
				1084	circPPM1D	1	1474	1	1
				1085	circPPP1R12A	1	1475	1	1
				1086	circPPP1R12B	1	1476	1	1
				1087	circPPP2R1B	0.0622499	57	1	1
				1088	circPPP2R3A	1	1477	1	1
				1089	circPPP2R5A	0.500299	590	1	1
				1090	circPPP4R1	0.00256241	7	0.632549	0.632549
				1091	circPPP6R3_1	0.254232	280	1	1
				1092	circPPP6R3_2	1	1478	1	1
				1093	circPPP6R3_3	1	1071	1	1
				1094	circPRELID2_1	0.399682	444	1	1
				1095	circPRELID2_2	0.500296	576	1	1
				1096	circPREX2	1	1479	1	1
				1097	circPRKAA2_1	0.687706	899	1	1
				1098	circPRKAA2_2	1	1480	1	1
				1099	circPRKAG2	0.269272	340	1	1
				1100	circPRKAR1A_1	0.205116	222	1	1
				1101	circPRKAR1A_2	1	1481	1	1
				1102	circPRKCI	0.562025	775	1	1
				1103	circPRKD3	0.753729	946	1	1
				1104	circPRKDC	1	1482	1	1
				1105	circPRPF40A_1	0.19896	217	1	1
				1106	circPRPF40A_1	1	1483	1	1
				1107	circPRPF40A_2	0.50033	687	1	1
				1108	circPRPF40A_2	1	1484	1	1
				1109	circPRPF40A_3	1	1485	1	1
				1110	circPRPSAP1	1	1486	1	1
				1111	circPSD3_1	0.142512	165	1	1
				1112	circPSD3_2	0.182234	203	1	1
				1113	circPSD3_3	0.19027	207	1	1
				1114	circPSIP1	1	1487	1	1
				1115	circPSMC6	1	1488	1	1
				1116	circPSMD2	1	999	1	1
				1117	circPSME4	0.517448	707	1	1
				1118	circPSPC1_1	0.0042432	12	0.611022	0.611022
				1119	circPSPC1_2	0.0909577	94	1	1
				1120	circPSPC1_3	0.289495	358	1	1
				1121	circPTBP3_1	0.180237	201	1	1
				1122	circPTBP3_2	0.802763	972	1	1
				1123	circPTBP3_3	1	1489	1	1
				1124	circPTGES3	0.384418	433	1	1
				1125	circPTK2_1	0.607842	824	1	1
				1126	circPTK2_2	1	1490	1	1
				1127	circPTK2_3	1	1491	1	1
				1128	circPTP4A1_1	0.289495	359	1	1
				1129	circPTP4A1_2	0.770782	957	1	1
				1130	circPTP4A1_3	0.579843	819	1	1
				1131	circPTP4A1_4	1	1492	1	1
				1132	circPTPN11	0.57471	801	1	1
				1133	circPTPN9_1	0.18012	198	1	1
				1134	circPTPN9_2	0.269272	341	1	1
				1135	circPTPN9_3	0.500328	634	1	1
				1136	circPTPN9_4	0.705587	911	1	1
				1137	circPTPRJ	1	1493	1	1
				1138	circPUM2_1	0.0662391	67	1	1
				1139	circPUM2_2	0.113764	111	1	1
				1140	circPUM3	1	1072	1	1
				1141	circPUS7	1	1073	1	1
				1142	circPUS7	1	1494	1	1
				1143	circQKI	0.201279	219	1	1
				1144	circQRICH1	1	1495	1	1
				1145	circQRICH1	1	1496	1	1
				1146	circQSER1_1	0.562025	776	1	1
				1147	circQSER1_2	0.783094	966	1	1
				1148	circR3HDM1_1	1	1497	1	1
				1149	circR3HDM1_2	1	1498	1	1
				1150	circRAB10	0.269272	342	1	1
				1151	circRAB28	0.399714	446	1	1
				1152	circRAB32	0.264853	328	1	1
				1153	circRAB3IP_1	0.419947	455	1	1
				1154	circRAB3IP_2	1	1499	1	1
				1155	circRAB6A_1	0.0534629	51	1	1
				1156	circRAB6A_2	0.500296	577	1	1
				1157	circRAB6A_3	1	1500	1	1
				1158	circRABEP1	1	1501	1	1
				1159	circRABGAP1_1	0.168168	185	1	1
				1160	circRABGAP1_2	0.250165	261	1	1
				1161	circRABGAP1_3	1	1502	1	1
				1162	circRABGAP1L	0.0573741	54	1	1
				1163	circRAD18	0.125165	129	1	1
				1164	circRAD23B_1	0.754177	949	1	1
				1165	circRAD23B_2	1	1503	1	1
				1166	circRAD51C	1	1504	1	1
				1167	circRAD54B	0.57471	802	1	1
				1168	circRAF1	1	1505	1	1
				1169	circRALGAPA1_1	1	1506	1	1
				1170	circRALGAPA1_2	1	1507	1	1
				1171	circRALGPS1	1	1508	1	1
				1172	circRANBP9_1	0.0783335	82	1	1
				1173	circRANBP9_2	0.50011	548	1	1
				1174	circRANBP9_3	0.50011	549	1	1
				1175	circRANBP9_4	1	1509	1	1
				1176	circRAPGEF2	0.399714	447	1	1
				1177	circRARS	0.641416	869	1	1
				1178	circRASA2_1	0.00197252	6	0.568085	0.568085
				1179	circRASA2_2	0.255788	301	1	1
				1180	circRASA2_3	1	1510	1	1
				1181	circRASEF	0.554077	735	1	1
				1182	circRASGEF1B	0.0942463	98	1	1
				1183	circRASGRF2	0.16829	186	1	1
				1184	circRB1CC1	0.344291	379	1	1
				1185	circRBL1	1	1511	1	1
				1186	circRBM6_1	0.57471	803	1	1
				1187	circRBM6_2	1	1512	1	1
				1188	circRBM6_3	1	1513	1	1
				1189	circRC3H1	0.50011	550	1	1
				1190	circRDH11	0.57471	804	1	1
				1191	circRDX	1	1514	1	1
				1192	circRERE_1	0.231773	247	1	1
				1193	circRERE_2	0.458367	502	1	1
				1194	circREV1_1	0.18012	199	1	1
				1195	circREV1_2	0.238784	250	1	1
				1196	circREV1_3	1	1515	1	1
				1197	circREV3L	1	1074	1	1
				1198	circRFC1	0.749453	939	1	1
				1199	circRFX7	1	1516	1	1
				1200	circRHBDD1	0.624168	827	1	1
				1201	circRHOBTB1	0.125165	130	1	1
				1202	circRHOT1_1	0.384433	434	1	1
				1203	circRHOT1_2	0.500328	635	1	1
				1204	circRHOT1_3	1	1517	1	1
				1205	circRHOT1_4	1	1075	1	1
				1206	circRICTOR	0.254232	281	1	1
				1207	circRILPL1	0.687706	900	1	1
				1208	circRIMS1_1	0.2924	365	1	1
				1209	circRIMS1_2	0.454958	501	1	1
				1210	circRIMS1_3	0.500296	578	1	1
				1211	circRIMS1_4	0.50033	688	1	1
				1212	circRIMS1_5	1	1518	1	1
				1213	circRINT1	1	1519	1	1
				1214	circRIOK3	1	1520	1	1
				1215	circRNASEH1	0.269198	334	1	1
				1216	circRNF10	0.375275	426	1	1
				1217	circRNF111_1	0.070151	70	1	1
				1218	circRNF111_2	0.809852	975	1	1
				1219	circRNF115	0.731762	924	1	1
				1220	circRNF121	1	1521	1	1
				1221	circRNF138	0.719731	912	1	1
				1222	circRNF145	0.882684	990	1	1
				1223	circRNF169_1	1	1522	1	1
				1224	circRNF169_2	1	1523	1	1
				1225	circRNF2	0.500328	636	1	1
				1226	circRNF216_1	1	1524	1	1
				1227	circRNF216_2	1	1525	1	1
				1228	circRNF216_3	1	1526	1	1
				1229	circRNF219	1	1527	1	1
				1230	circROCK1	1	1528	1	1
				1231	circRPAP2_1	0.50033	664	1	1
				1232	circRPAP2_2	1	1529	1	1
				1233	circRPL3	1	994	1	1
				1234	circRPRD1B	1	1530	1	1
				1235	circRPRD2	0.554077	736	1	1
				1236	circRPS6KB1_1	0.50033	689	1	1
				1237	circRPS6KB1_2	0.554268	760	1	1
				1238	circRPS6KB1_3	1	1531	1	1
				1239	circRPS6KB1_4	1	1532	1	1
				1240	circRPS6KB1_5	1	1533	1	1
				1241	circRPS6KC1_1	0.50011	551	1	1
				1242	circRPS6KC1_2	1	1534	1	1
				1243	circRPSA	1	1535	1	1
				1244	circRRAS2	0.113764	112	1	1
				1245	circRRP15	0.729627	923	1	1
				1246	circRSC1A1	1	1536	1	1
				1247	circRSF1_1	0.0851266	85	1	1
				1248	circRSF1_2	0.57471	805	1	1
				1249	circRSF1_3	1	1537	1	1
				1250	circRSRC1_1	0.0256804	32	1	1
				1251	circRSRC1_2	1	1538	1	1
				1252	circRTTN_3	0.419947	456	1	1
				1253	circRUFY1	0.774711	959	1	1
				1254	circRUFY3	0.775555	962	1	1
				1255	circRXFP1	0.554268	761	1	1
				1256	circS100PBP	1	1539	1	1
				1257	circSACM1L	1	1540	1	1
				1258	circSAMD4A	0.00346001	9	0.664322	0.664322
				1259	circSAMD4B	1	1541	1	1
				1260	circSASH1	1	1542	1	1
				1261	circSBNO1	0.269272	343	1	1
				1262	circSCAF11	1	1543	1	1
				1263	circSCAF4	1	1544	1	1
				1264	circSCAF8_1	1	1545	1	1
				1265	circSCAF8_2	1	1546	1	1
				1266	circSCAF8_3	1	1547	1	1
				1267	circSCAI	1	1548	1	1
				1268	circSCAMP1	0.269272	344	1	1
				1269	circSCARB1	1	1549	1	1
				1270	circSCLT1	1	1550	1	1
				1271	circSCMH1_1	0.500328	637	1	1
				1272	circSCMH1_2	1	1551	1	1
				1273	circSCPEP1	0.50033	690	1	1
				1274	circSCYL2	0.289495	360	1	1
				1275	circSDAD1	0.748288	937	1	1
				1276	circSEC13	0.425236	466	1	1
				1277	circSEC23B_1	0.50033	691	1	1
				1278	circSEC23B_2	1	1552	1	1
				1279	circSEC23B_3	1	1076	1	1
				1280	circSEC24A_1	0.219059	240	1	1
				1281	circSEC24A_2	0.195499	208	1	1
				1282	circSEC24A_3	0.250165	262	1	1
				1283	circSEC24A_4	0.255717	297	1	1
				1284	circSEC24A_5	0.453486	496	1	1
				1285	circSEC24A_6	0.50033	665	1	1
				1286	circSEC24A_7	1	1553	1	1
				1287	circSEC24A_8	1	1077	1	1
				1288	circSEC24A_9	1	1078	1	1
				1289	circSEC24B_1	1	1021	1	1
				1290	circSEC24B_2	1	1554	1	1
				1291	circSEC24D	0.500296	579	1	1
				1292	circSEC62_1	1	1555	1	1
				1293	circSEC62_2	1	1556	1	1
				1294	circSEC63	0.57471	806	1	1
				1295	circSECISBP2	1	995	1	1
				1296	circSECISBP2	1	1557	1	1
				1297	circSENP7_1	0.57471	807	1	1
				1298	circSENP7_2	1	1558	1	1
				1299	circSENP7_3	1	1559	1	1
				1300	circSENP7_4	1	1560	1	1
				1301	circSEPT7_5	0.57471	808	1	1
				1302	circSERINC2	1	1561	1	1
				1303	circSESTD1	1	1562	1	1
				1304	circSETBP1	1	1022	1	1
				1305	circSETD2_1	0.687706	901	1	1
				1306	circSETD2_2	1	1563	1	1
				1307	circSETD3	1	1564	1	1
				1308	circSF3B3	1	1565	1	1
				1309	circSH3BP4	0.760558	952	1	1
				1310	circSH3GLB1_1	0.664362	883	1	1
				1311	circSH3GLB1_2	1	1566	1	1
				1312	circSHANK2	0.641437	874	1	1
				1313	circSHOC2	1	1567	1	1
				1314	circSIN3A	1	1568	1	1
				1315	circSLAIN2_1	0.264853	329	1	1
				1316	circSLAIN2_2	1	1569	1	1
				1317	circSLC15A2	0.448697	486	1	1
				1318	circSLC25A3	1	1570	1	1
				1319	circSLC25A40	0.57471	809	1	1
				1320	circSLC30A7_1	0.284035	351	1	1
				1321	circSLC30A7_2	0.750389	944	1	1
				1322	circSLC33A1_1	0.422411	463	1	1
				1323	circSLC33A1_2	0.549324	715	1	1
				1324	circSLC33A1_3	1	1571	1	1
				1325	circSLC33A1_4	1	1572	1	1
				1326	circSLC38A10	0.775383	961	1	1
				1327	circSLC38A9_1	0.625165	835	1	1
				1328	circSLC38A9_2	1	1573	1	1
				1329	circSLC38A9_3	1	1574	1	1
				1330	circSLC39A8_4	1	1007	1	1
				1331	circSLC39A8_5	1	1575	1	1
				1332	circSLC5A10_1	0.0875728	89	1	1
				1333	circSLC5A10_2	0.307971	373	1	1
				1334	circSLC5A10_3	0.17755	193	1	1
				1335	circSLC5A10_4	0.344291	380	1	1
				1336	circSLC5A10_5	1	1037	1	1
				1337	circSLC5A10_6	1	1576	1	1
				1338	circSLC5A10_7	1	1577	1	1
				1339	circSLC5A10_8	1	1578	1	1
				1340	circSLC6A14	0.500296	580	1	1
				1341	circSLC7A6_1	1	1579	1	1
				1342	circSLC9A6_2	0.226642	243	1	1
				1343	circSLTM_1	0.180419	202	1	1
				1344	circSLTM_2	0.310148	374	1	1
				1345	circSLTM_3	1	1580	1	1
				1346	circSMAD1_1	0.360296	393	1	1
				1347	circSMAD1_2	1	1581	1	1
				1348	circSMAD1_3	1	1582	1	1
				1349	circSMAD4_1	0.15014	169	1	1
				1350	circSMAD4_2	0.50011	552	1	1
				1351	circSMAD4_3	0.635996	861	1	1
				1352	circSMAD4_4	0.554077	737	1	1
				1353	circSMAD4_5	1	1583	1	1
				1354	circSMAD5_1	0.493419	509	1	1
				1355	circSMAD5_2	1	1584	1	1
				1356	circSMARCA2	1	1585	1	1
				1357	circSMARCC1_1	0.50033	666	1	1
				1358	circSMARCC1_2	1	1586	1	1
				1359	circSMARCC1_3	1	1587	1	1
				1360	circSMC3	0.644328	879	1	1
				1361	circSMC4	0.50011	553	1	1
				1362	circSMC5	1	1588	1	1
				1363	circSMCHD1_1	0.628878	839	1	1
				1364	circSMCHD1_2	1	1008	1	1
				1365	circSMCHD1_3	1	1589	1	1
				1366	circSMG1_1	0.549324	716	1	1
				1367	circSMG1_2	0.630425	851	1	1
				1368	circSMG1_3	0.74877	938	1	1
				1369	circSMG1_4	1	1590	1	1
				1370	circSMG7	0.307684	371	1	1
				1371	circSNAP47	1	1591	1	1
				1372	circSNRK	0.0263888	33	1	1
				1373	circSNTB2	0.384415	432	1	1
				1374	circSNX13	1	1592	1	1
				1375	circSNX14	1	1593	1	1
				1376	circSNX25_1	0.888173	991	1	1
				1377	circSNX25_2	1	1594	1	1
				1378	circSNX27_1	0.0626375	59	1	1
				1379	circSNX27_2	0.264853	330	1	1
				1380	circSNX6	0.0626375	60	1	1
				1381	circSNX9	1	1595	1	1
				1382	circSOCS7	1	1596	1	1
				1383	circSORBS1_1	0.500328	638	1	1
				1384	circSORBS1_2	1	1597	1	1
				1385	circSORBS1_3	1	1598	1	1
				1386	circSORD	1	1599	1	1
				1387	circSPAG9_1	0.264853	331	1	1
				1388	circSPAG9_2	0.500296	581	1	1
				1389	circSPAG9_3	1	1079	1	1
				1390	circSPAG9_4	1	1600	1	1
				1391	circSPATA6	1	1601	1	1
				1392	circSPECC1	0.815877	981	1	1
				1393	circSPEN_1	0.345513	382	1	1
				1394	circSPEN_2	0.726803	918	1	1
				1395	circSPG21	1	1602	1	1
				1396	circSPICE1	1	1603	1	1
				1397	circSPIDR	0.392984	438	1	1
				1398	circSPPL3_1	1	1604	1	1
				1399	circSPPL3_2	1	1605	1	1
				1400	circSPRED1	1	1606	1	1
				1401	circSREK1	0.50033	667	1	1
				1402	circSRP54	0.57471	810	1	1
				1403	circSRPK1	0.62971	841	1	1
				1404	circSRPK2_1	1	1607	1	1
				1405	circSRPK2_2	1	1608	1	1
				1406	circSS18_1	0.0626375	61	1	1
				1407	circSS18_2	1	1609	1	1
				1408	circST13	1	1080	1	1
				1409	circST3GAL6	0.57471	811	1	1
				1410	circST7L_1	0.628838	838	1	1
				1411	circST7L_2	1	1610	1	1
				1412	circST7L_3	1	1611	1	1
				1413	circSTAG1	1	1000	1	1
				1414	circSTAG2	1	1612	1	1
				1415	circSTAU1	0.50033	668	1	1
				1416	circSTAU2	0.230072	246	1	1
				1417	circSTK17A	1	1613	1	1
				1418	circSTK3	1	1614	1	1
				1419	circSTRN3_1	0.443782	475	1	1
				1420	circSTRN3_2	0.548439	713	1	1
				1421	circSTRN3_3	1	1615	1	1
				1422	circSTT3B	0.513321	706	1	1
				1423	circSTX8	1	1616	1	1
				1424	circSTXBP3_1	0.562025	777	1	1
				1425	circSTXBP3_2	0.862313	987	1	1
				1426	circSUCO_1	0.50011	554	1	1
				1427	circSUCO_2	1	1617	1	1
				1428	circSUGCT_1	0.630264	845	1	1
				1429	circSUGCT_2	1	1002	1	1
				1430	circSULF2	0.754177	950	1	1
				1431	circSUPT20H	0.219059	241	1	1
				1432	circSVIL	1	1618	1	1
				1433	circSWT1_1	0.289495	361	1	1
				1434	circSWT1_2	0.219059	242	1	1
				1435	circSYDE2	0.50011	555	1	1
				1436	circSYNCRIP_1	0.17378	187	1	1
				1437	circSYNCRIP_2	1	1619	1	1
				1438	circSYNE2_1	0.50011	556	1	1
				1439	circSYNE2_2	1	1620	1	1
				1440	circSYNRG	1	1621	1	1
				1441	circTACC1	0.158766	171	1	1
				1442	circTAF4	1	1622	1	1
				1443	circTAF4B	0.00271167	8	0.585722	0.585722
				1444	circTAOK1	0.687706	902	1	1
				1445	circTAX1BP1_1	1	1623	1	1
				1446	circTAX1BP1_2	1	1624	1	1
				1447	circTAX1BP1_3	1	1625	1	1
				1448	circTAX1BP1_4	1	1626	1	1
				1449	circTBC1D1	1	1627	1	1
				1450	circTBC1D12_1	0.197549	215	1	1
				1451	circTBC1D12_2	0.369972	402	1	1
				1452	circTBC1D12_3	0.383912	430	1	1
				1453	circTBC1D22A_1	0.0226456	30	1	1
				1454	circTBC1D22A_2	0.917868	993	1	1
				1455	circTBC1D22A_3	0.62971	842	1	1
				1456	circTBC1D23	1	1628	1	1
				1457	circTBC1D32_1	0.50011	557	1	1
				1458	circTBC1D32_2	1	1023	1	1
				1459	circTBC1D32_3	1	1629	1	1
				1460	circTBC1D5	0.770769	956	1	1
				1461	circTBC1D8_1	0.271931	346	1	1
				1462	circTBC1D8_2	0.638694	862	1	1
				1463	circTBCD	0.318912	375	1	1
				1464	circTC2N_1	0.070151	71	1	1
				1465	circTC2N_2	0.092746	97	1	1
				1466	circTC2N_3	1	1630	1	1
				1467	circTCF12	1	1631	1	1
				1468	circTCP1	0.146528	168	1	1
				1469	circTDRD3_1	0.554077	738	1	1
				1470	circTDRD3_2	1	1081	1	1
				1471	circTECTA	1	1082	1	1
				1472	circTENT4A	1	1632	1	1
				1473	circTESK2	0.500328	639	1	1
				1474	circTET1_1	0.125165	131	1	1
				1475	circTET1_2	0.289495	362	1	1
				1476	circTEX10_1	0.128731	139	1	1
				1477	circTEX10_2	1	1633	1	1
				1478	circTEX9	1	1634	1	1
				1479	circTFAP2A	1	1635	1	1
				1480	circTFEB	1	1636	1	1
				1481	circTFRC	0.554268	762	1	1
				1482	circTGFB2	0.687706	903	1	1
				1483	circTGFBR1	0.50011	558	1	1
				1484	circTGFBR3_1	0.50011	559	1	1
				1485	circTGFBR3_2	0.50033	692	1	1
				1486	circTGFBR3_3	1	1637	1	1
				1487	circTGFBR3_4	1	1638	1	1
				1488	circTGFBRAP1	0.373545	405	1	1
				1489	circTHOC2	1	1639	1	1
				1490	circTHUMPD3	0.118998	117	1	1
				1491	circTIA1_1	0.50033	669	1	1
				1492	circTIA1_2	1	1640	1	1
				1493	circTIPRL	0.735073	929	1	1
				1494	circTLK1_1	0.250165	263	1	1
				1495	circTLK1_2	1	1641	1	1
				1496	circTLK1_3	1	1642	1	1
				1497	circTLK2_1	0.453486	497	1	1
				1498	circTLK2_2	0.44989	488	1	1
				1499	circTM9SF3	0.256414	314	1	1
				1500	circTMEM120B	0.50033	693	1	1
				1501	circTMEM127	1	1643	1	1
				1502	circTMEM131	0.554077	739	1	1
				1503	circTMEM135	1	1644	1	1
				1504	circTMEM237	0.254278	289	1	1
				1505	circTMEM245	1	1645	1	1
				1506	circTMEM39A	0.554077	740	1	1
				1507	circTMEM43	0.256414	315	1	1
				1508	circTMEM50B	1	1646	1	1
				1509	circTMEM56_1	0.866577	988	1	1
				1510	circTMEM56_2	1	1647	1	1
				1511	circTMEM65	1	1648	1	1
				1512	circTMOD3	1	1649	1	1
				1513	circTMTC3	0.250165	264	1	1
				1514	circTNFRSF21_1	0.500328	640	1	1
				1515	circTNFRSF21_2	0.750389	945	1	1
				1516	circTNS3_1	1	1650	1	1
				1517	circTNS3_2	1	1651	1	1
				1518	circTOGARAM1	1	1652	1	1
				1519	circTOP1	1	1653	1	1
				1520	circTRAF3IP1	0.133087	150	1	1
				1521	circTRAM1	0.419947	457	1	1
				1522	circTRAPPC10_1	0.500328	641	1	1
				1523	circTRAPPC10_2	1	1654	1	1
				1524	circTRAPPC10_3	1	1655	1	1
				1525	circTRAPPC11	1	1656	1	1
				1526	circTRAPPC8	0.50033	670	1	1
				1527	circTRAPPC9	0.0161989	27	1	1
				1528	circTRDMT1	0.73443	927	1	1
				1529	circTRIM2	1	1657	1	1
				1530	circTRIM33	1	1658	1	1
				1531	circTRIP11	0.50011	560	1	1
				1532	circTRIP12_1	1	1659	1	1
				1533	circTRIP12_2	1	1660	1	1
				1534	circTRMT11	0.57471	812	1	1
				1535	circTRPM7_1	0.0537349	52	1	1
				1536	circTRPM7_2	0.453486	498	1	1
				1537	circTRPM7_3	0.50011	561	1	1
				1538	circTRPM7_4	0.50011	562	1	1
				1539	circTRPM7_5	0.554077	741	1	1
				1540	circTRPM7_6	0.728384	922	1	1
				1541	circTRPM7_7	1	1661	1	1
				1542	circTRPS1_1	0.630264	846	1	1
				1543	circTRPS1_2	1	1662	1	1
				1544	circTRPS1_3	1	1663	1	1
				1545	circTTC13	0.0777483	80	1	1
				1546	circTTC17	0.57471	813	1	1
				1547	circTTC21B	1	1664	1	1
				1548	circTTC3_1	0.137084	152	1	1
				1549	circTTC3_2	1	1665	1	1
				1550	circTTC3_3	1	1666	1	1
				1551	circTTC4	1	1667	1	1
				1552	circTTL	0.500328	642	1	1
				1553	circTTLL5	1	1668	1	1
				1554	circTUT7	0.0626375	62	1	1
				1555	circTXN2	0.0493711	49	1	1
				1556	circTXNDC16_1	0.197549	216	1	1
				1557	circTXNDC16_2	1	1669	1	1
				1558	circUBA2	1	1670	1	1
				1559	circUBAP1	1	1671	1	1
				1560	circUBAP2_1	0.0626375	63	1	1
				1561	circUBAP2_2	0.508245	702	1	1
				1562	circUBAP2_3	1	1672	1	1
				1563	circUBAP2L	1	1673	1	1
				1564	circUBE2D1	0.554077	742	1	1
				1565	circUBE2D2	1	1674	1	1
				1566	circUBE2J2	0.630422	850	1	1
				1567	circUBE2K_1	0.50033	694	1	1
				1568	circUBE2K_2	0.630888	854	1	1
				1569	circUBE3A	0.0607277	56	1	1
				1570	circUBE3B	1	1675	1	1
				1571	circUBE3C	0.500328	643	1	1
				1572	circUBE4B	1	1024	1	1
				1573	circUBR2	0.554268	763	1	1
				1574	circUBR3	0.735945	931	1	1
				1575	circUBR5_1	0.250165	265	1	1
				1576	circUBR5_2	0.353996	388	1	1
				1577	circUBR7	0.378505	429	1	1
				1578	circUCHL3	0.562025	778	1	1
				1579	circUCK2	0.575876	817	1	1
				1580	circUGGT1_1	0.256414	316	1	1
				1581	circUGGT1_2	0.630275	848	1	1
				1582	circUGGT1_3	1	1676	1	1
				1583	circUGP2	1	1025	1	1
				1584	circUHRF1BP1L	0.500328	644	1	1
				1585	circUIMC1	0.554077	743	1	1
				1586	circULK2	1	1677	1	1
				1587	circULK4_1	0.500328	645	1	1
				1588	circULK4_2	1	1678	1	1
				1589	circUNC13B	0.554077	744	1	1
				1590	circUNKL	1	1679	1	1
				1591	circUPF2_1	0.16428	172	1	1
				1592	circUPF2_2	0.508245	703	1	1
				1593	circUSO1	0.264807	321	1	1
				1594	circUSP10	0.554077	745	1	1
				1595	circUSP24_1	0.264807	322	1	1
				1596	circUSP24_2	1	1680	1	1
				1597	circUSP24_3	1	1681	1	1
				1598	circUSP3_1	0.508245	704	1	1
				1599	circUSP3_2	1	1682	1	1
				1600	circUSP3_3	1	1683	1	1
				1601	circUSP34	0.50033	695	1	1
				1602	circUSP37	1	1684	1	1
				1603	circUSP4	1	1685	1	1
				1604	circUSP40	0.50011	563	1	1
				1605	circUSP47_1	0.375275	427	1	1
				1606	circUSP47_2	0.50011	564	1	1
				1607	circUSP54	1	1686	1	1
				1608	circUSP7	0.556236	768	1	1
				1609	circUSP8	0.0156973	26	1	1
				1610	circUTP18	1	1687	1	1
				1611	circUTRN	1	1688	1	1
				1612	circUXS1	1	1689	1	1
				1613	circVAPA	1	1026	1	1
				1614	circVASH2	1	1690	1	1
				1615	circVAV1	1	1691	1	1
				1616	circVAV2	1	1692	1	1
				1617	circVCAN	0.554268	764	1	1
				1618	circVDR	0.50033	671	1	1
				1619	circVPS13B	0.644328	880	1	1
				1620	circVPS33B	0.641416	870	1	1
				1621	circVPS35_1	0.133087	151	1	1
				1622	circVPS35_2	0.202627	221	1	1
				1623	circVPS35_3	0.57471	814	1	1
				1624	circVPS35_4	0.554268	765	1	1
				1625	circVPS35_5	1	1693	1	1
				1626	circVPS50_6	0.781024	965	1	1
				1627	circVWA8	1	1694	1	1
				1628	circWAPL	1	1695	1	1
				1629	circWASF3	1	1696	1	1
				1630	circWASHC4	0.254232	282	1	1
				1631	circWASHC5	0.554077	746	1	1
				1632	circWBP4	1	1083	1	1
				1633	circWDFY2	1	1697	1	1
				1634	circWDFY3	0.554077	747	1	1
				1635	circWDR27	1	1698	1	1
				1636	circWDR33	0.00443382	13	0.589357	0.589357
				1637	circWDR36	1	1699	1	1
				1638	circWDR37_1	0.0313532	39	1	1
				1639	circWDR37_2	0.779072	964	1	1
				1640	circWDR37_3	1	1700	1	1
				1641	circWDR48	1	1701	1	1
				1642	circWDR7_1	0.344291	381	1	1
				1643	circWDR7_2	1	1702	1	1
				1644	circWDR75_1	0.625165	836	1	1
				1645	circWDR75_2	1	1703	1	1
				1646	circWIPI2	1	1704	1	1
				1647	circWNK1	0.289495	363	1	1
				1648	circWWOX	0.0657488	66	1	1
				1649	circWWP1_1	0.0626375	64	1	1
				1650	circWWP1_2	0.57471	815	1	1
				1651	circWWP1_3	1	1084	1	1
				1652	circXDH_1	0.166799	179	1	1
				1653	circXDH_2	0.375275	428	1	1
				1654	circXPC	1	1705	1	1
				1655	circXPO4	1	1706	1	1
				1656	circXPO6	0.255717	298	1	1
				1657	circXPOT_1	0.453486	499	1	1
				1658	circXPOT_2	1	1707	1	1
				1659	circXRN2	0.500296	582	1	1
				1660	circYAP1	0.197441	213	1	1
				1661	circYEATS2	1	1708	1	1
				1662	circYES1	0.500328	646	1	1
				1663	circYIPF5	0.749453	940	1	1
				1664	circYME1L1	1	1709	1	1
				1665	circYTHDC2	0.500328	647	1	1
				1666	circYTHDF3	1	1710	1	1
				1667	circZBTB44	1	1711	1	1
				1668	circZC3H14	0.125165	132	1	1
				1669	circZC3H15	0.554077	748	1	1
				1670	circZC3H18_1	0.419947	458	1	1
				1671	circZC3H18_2	0.364088	395	1	1
				1672	circZC3H6_1	0.255717	299	1	1
				1673	circZC3H6_2	1	1085	1	1
				1674	circZC3H7A_1	0.701363	910	1	1
				1675	circZC3H7A_2	1	1712	1	1
				1676	circZCCHC7	1	1086	1	1
				1677	circZDHHC20_1	0.500328	648	1	1
				1678	circZDHHC20_2	1	1713	1	1
				1679	circZDHHC7	0.186286	205	1	1
				1680	circZFAND3	1	1714	1	1
				1681	circZFC3H1_1	0.641437	875	1	1
				1682	circZFC3H1_2	0.732257	926	1	1
				1683	circZFC3H1_3	1	1715	1	1
				1684	circZFC3H1_4	1	1027	1	1
				1685	circZFR	1	1087	1	1
				1686	circZFX	0.372953	403	1	1
				1687	circZFYVE26	0.271972	347	1	1
				1688	circZHX1	1	1716	1	1
				1689	circZKSCAN1	1	1717	1	1
				1690	circZMYM2_1	0.250165	266	1	1
				1691	circZMYM2_2	0.250165	267	1	1
				1692	circZMYM2_3	0.687706	904	1	1
				1693	circZMYM2_4	1	1718	1	1
				1694	circZMYM4_1	0.500328	649	1	1
				1695	circZMYM4_2	1	1719	1	1
				1696	circZMYM4_3	1	1720	1	1
				1697	circZMYM4_4	0.847215	985	1	1
				1698	circZMYM5	0.50033	696	1	1
				1699	circZMYND11_1	0.0386237	42	1	1
				1700	circZMYND11_2	0.726803	919	1	1
				1701	circZNF143	1	1721	1	1
				1702	circZNF148_1	0.453486	500	1	1
				1703	circZNF148_2	1	1039	1	1
				1704	circZNF207	0.500328	650	1	1
				1705	circZNF236_1	0.255788	302	1	1
				1706	circZNF236_2	1	1009	1	1
				1707	circZNF292	0.167956	182	1	1
				1708	circZNF37A	0.384433	435	1	1
				1709	circZNF395	1	1722	1	1
				1710	circZNF532_1	0.250262	269	1	1
				1711	circZNF532_2	0.166595	176	1	1
				1712	circZNF532_3	1	1723	1	1
				1713	circZNF566	0.250165	268	1	1
				1714	circZNF568	1	1724	1	1
				1715	circZNF609	1	1725	1	1
				1716	circZNF644_1	0.296165	367	1	1
				1717	circZNF644_2	1	1726	1	1
				1718	circZNF644_3	1	1727	1	1
				1719	circZNF654	0.0216199	29	1	1
				1720	circZNF713	0.746065	935	1	1
				1721	circZNF827	0.810166	976	1	1
				1722	circZNFX1	0.291927	364	1	1
				1723	circZRANB1	0.554077	749	1	1
				1724	circZSWIM6_1	0.500296	583	1	1
				1725	circZSWIM6_2	1	1728	1	1
				1726	circZZZ3_1	0.113764	113	1	1
				1727	circZZZ3_2	0.399682	445	1	1
				1728	circZZZ3_3	0.419947	459	1	1
